# Supplementary material for: Enantioselective Syntheses of Wickerols A and B
Source: PubMed Central journal article supplement (PMC10037325; doi:10.1021/jacs.3c00448), 2023-03-08

# Enantioselective Syntheses of Wickerols A and B

Jonathan Chung, Joseph S. Capani, Jr., Matthias Göhl, Philipp C. Roosen, and Christopher D. Vanderwal

## Supporting Information

### Table of Contents:

#### I. Supplementary Results and Discussion

#### II. Experimental Information

Materials and Methods.....S2

Method for Predicting <sup>13</sup>C Chemical Shifts.....S2

Experimental Procedures and Characterization Data.....S3

III. References.....S35

#### IV. Experimental Data

SFC Traces .....S36

X-ray Data.....S37

Predicted <sup>13</sup>C Chemical Shifts and Comparisons of Spectral Data.....S62

1D and 2D NMR Spectra.....S75

## I. Supplementary Results and Discussion

### Conjugate butenylation

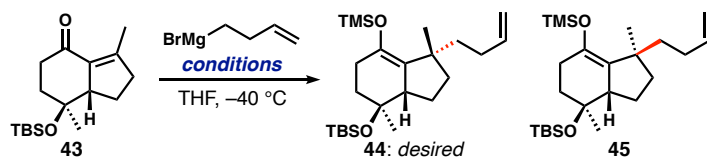

| conditions |              |          |            |
|------------|--------------|----------|------------|
| Entry      | Cu(I) source | Additive | dr (44:45) |
| 1          | CuI          | –        | 33:67      |
| 2          | CuBr         | –        | 45:55      |
| 3          | CuCl         | –        | 48:52      |
| 4          | CuBr-DMS     | HMPA     | 70:30      |
| 5          | CuCl         | DMS      | 47:53      |
| 6          | CuCl         | HMPA     | 4:96       |
| 7          | CuCl·2LiCl   | –        | 4:96       |
| 8          | CuCN         | HMPA     | 6:94       |
| 9          | CuCN·2LiCl   | HMPA     | 4:96       |
| 10         | CuCN·2LiCl   | –        | 4:96       |

**Figure S1.** Selected results from an extensive screen of conditions for conjugate butenylation of hydrindenone **43**.

### Ketyl radical cyclization

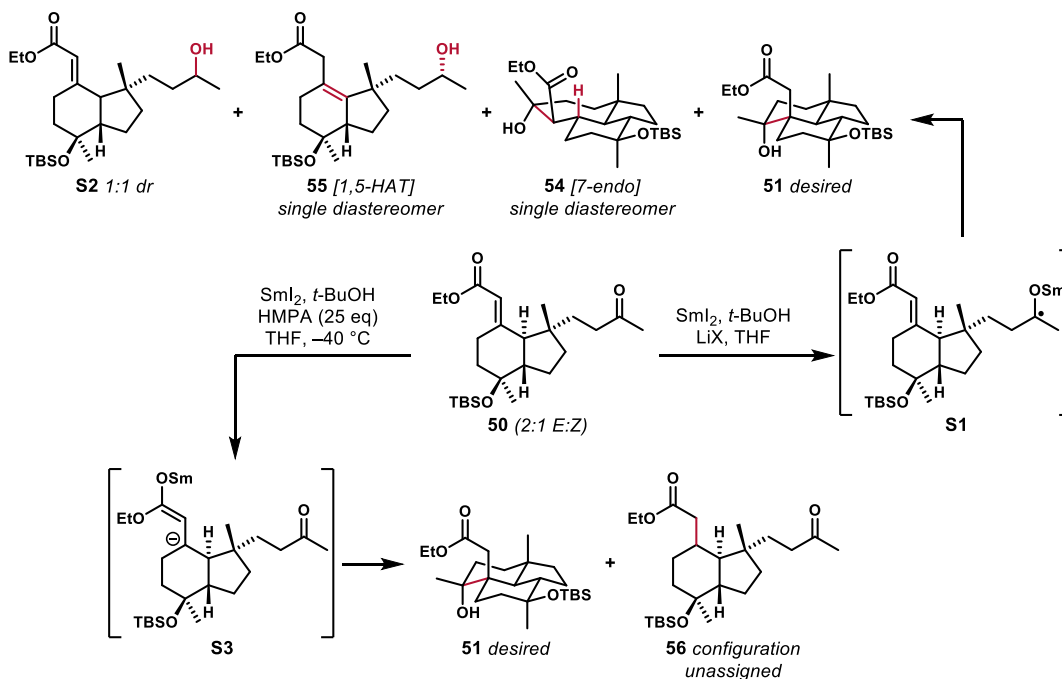

**Scheme S1.** Plausible divergent mechanistic pathways for the formation of byproducts during ketyl radical cyclization.

We expect that two distinct mechanisms are operative, especially considering the mutually exclusive formation of **55** and **56**. Firstly, **50** can take delivery of an electron from Sm(II) at the ketone, generating ketyl radical anion **S1** that could then undergo intramolecular 6-*exo* Giese addition to give the desired **51**. The observed diastereoselectivity is rationalized by electrostatic repulsion between the ketyl alkoxide and the enoate ester.<sup>1</sup> Compared with the model system, it is conceivable that some steric strain from the

axial methyl group must be overcome, possibly driving ketyl radical anion **51** down non-productive pathways such as 1,5-HAT to stereoselectively generate **55** or premature reduction to the alcohol **52**. That hypothesis is also consistent with the observation of 7-*endo* product **54**, which was not observed in the model system.

Our observation that **55** and **56** formation were mutually exclusive suggests that, depending upon the reduction potential of the Sm(II) complex utilized, **50** can accept an electron at the unsaturated ester. Indeed, this anionic reaction pathway for bond formation has been proposed by Proctor and co-workers.<sup>2,3</sup> The presumed dianion **53** could undergo intramolecular homoaldol addition to generate the desired product **51**, while quenching could lead to generation of **56**. It is clear that modulations in redox potential and additives can have a large impact on the operative reaction pathways.

### Prins cyclization

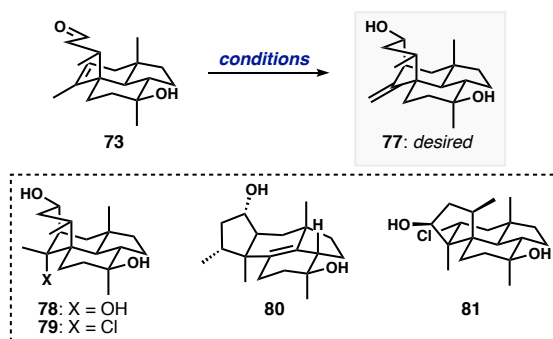

| Entry | Conditions                                                                  | Result                                                                       |
|-------|-----------------------------------------------------------------------------|------------------------------------------------------------------------------|
| 1     | HCl <sub>(aq)</sub> , THF, 0 °C                                             | 29% <b>77</b> , 49% <b>78</b> , 22% <b>80</b>                                |
| 2     | TFA, CH <sub>2</sub> Cl <sub>2</sub> , rt                                   | >95% <b>80</b>                                                               |
| 3     | THF, CH <sub>2</sub> Cl <sub>2</sub> , -40 °C                               | >95% <b>80</b>                                                               |
| 4     | THF, CH <sub>2</sub> Cl <sub>2</sub> , -78 °C                               | no reaction                                                                  |
| 5     | AcOH, CH <sub>2</sub> Cl <sub>2</sub> , 40 °C                               | no reaction                                                                  |
| 6     | MsOH, CH <sub>2</sub> Cl <sub>2</sub> , 0 °C                                | decomposition                                                                |
| 7     | MsOH, THF, 0 °C                                                             | no reaction                                                                  |
| 8     | MsOH, dioxane, 0 °C                                                         | 20% <b>73</b> , 35% <b>77</b> , 45% <b>80</b>                                |
| 9     | HBF <sub>4</sub> •OEt <sub>2</sub> , CH <sub>2</sub> Cl <sub>2</sub> , 0 °C | decomposition                                                                |
| 10    | HBF <sub>4</sub> •OEt <sub>2</sub> , THF, 0 °C                              | no reaction                                                                  |
| 11    | HBF <sub>4</sub> •OEt <sub>2</sub> , dioxane, 0 °C                          | decomposition                                                                |
| 12    | HFIP, 50 °C, 24 hr                                                          | 56% <b>73</b> , 44% <b>80</b>                                                |
| 13    | Dowex 50WX8-400, CH <sub>2</sub> Cl <sub>2</sub> , rt                       | 17% <b>73</b> , 9% <b>77</b> , 74% <b>80</b>                                 |
| 14    | Dowex 50WX8-400, THF, rt                                                    | 31% <b>73</b> , 24% <b>77</b> , 45% <b>80</b>                                |
| 15    | SiO <sub>2</sub> •NaHSO <sub>4</sub> , CH <sub>2</sub> Cl <sub>2</sub> , rt | decomposition                                                                |
| 16    | SiO <sub>2</sub> , CH <sub>2</sub> Cl <sub>2</sub> , rt                     | no reaction                                                                  |
| 17    | SiO <sub>2</sub> , THF, rt                                                  | no reaction                                                                  |
| 18    | SiO <sub>2</sub> , MeOH, rt                                                 | no reaction                                                                  |
| 19    | MK-10 clay, CH <sub>2</sub> Cl <sub>2</sub> , rt                            | decomposition                                                                |
| 20    | MK-10 clay, THF, 40 °C                                                      | no reaction                                                                  |
| 21    | TMSCl, MeOH, -40 °C                                                         | decomposition, MeOH incorporation                                            |
| 22    | HCl <sub>(dioxane)</sub> , 0 °C                                             | >95% <b>79</b>                                                               |
| 23    | HCl <sub>(ether)</sub> , 0 °C                                               | 8% <b>77</b> , 22% <b>80</b> , 70% <b>81</b>                                 |
| 24    | HCl <sub>(dioxane)</sub> ; DBU                                              | 75% <b>73</b> , 25% <b>79</b>                                                |
| 25    | HCl <sub>(dioxane)</sub> ; NaHCO <sub>3(aq)</sub>                           | 52% <b>73</b> , 15% <b>77</b> , 24% <b>78</b> , 9% <b>81</b>                 |
| 26    | HCl <sub>(ether)</sub> ; NaHCO <sub>3(aq)</sub>                             | 42% <b>73</b> , 9% <b>77</b> , 12% <b>79</b> , 12% <b>80</b> , 25% <b>81</b> |
| 27    | HCl <sub>(dioxane)</sub> ; NH <sub>4</sub> Cl <sub>(aq)</sub>               | 65% <b>73</b> , 14% <b>77</b> , 8% <b>80</b> , 13% <b>81</b>                 |

|    |                                                                      |                                                                             |
|----|----------------------------------------------------------------------|-----------------------------------------------------------------------------|
| 28 | HCl <sub>(dioxane)</sub> ; SiO <sub>2</sub> , dioxane, rt            | 4% <b>73</b> , 43% <b>77</b> , 8% <b>79</b> , 23% <b>80</b> , 19% <b>81</b> |
| 29 | HCl <sub>(dioxane)</sub> ; <i>i</i> -PrOH, 0 °C                      | 21% <b>77</b> , 24% <b>79</b> , 2% <b>80</b> , 53% <b>81</b>                |
| 30 | HCl <sub>(dioxane)</sub> ; <i>i</i> -PrOH, rt                        | 2% <b>73</b> , 48% <b>77</b> , 7% <b>79</b> , 7% <b>80</b> , 37% <b>81</b>  |
| 31 | HCl <sub>(dioxane)</sub> ; HFIP, 0 °C                                | decomposition                                                               |
| 32 | HCl <sub>(dioxane)</sub> ; HFIP/THF, °C                              | decomposition                                                               |
| 33 | HCl <sub>(dioxane)</sub> ; HFIP/CH <sub>2</sub> Cl <sub>2</sub> , °C | decomposition                                                               |
| 34 | HCl <sub>(dioxane)</sub> ; HFIP/Et <sub>2</sub> O, °C                | 3% <b>73</b> , 37% <b>77</b> , 44% <b>80</b> , 16% <b>81</b>                |
| 35 | HCl <sub>(dioxane)</sub> ; HFIP/dioxane, 0 °C                        | 58% <b>77</b> , 31% <b>80</b> , 11% <b>81</b>                               |

**Figure S2.** Selected results from an extensive screen of conditions for Prins cyclization of aldehyde **73**.

## II. Experimental Information

### Materials and Methods

All reactions were carried out in flame-dried glassware under an atmosphere of argon with dry solvents unless otherwise noted. Microwave reactions were performed in a CEM Discover Microwave. Reaction solvents including tetrahydrofuran (THF), diethyl ether (Et<sub>2</sub>O), dichloromethane (CH<sub>2</sub>Cl<sub>2</sub>), toluene, benzene (C<sub>6</sub>H<sub>6</sub>), acetonitrile (MeCN) and dimethylformamide (DMF) were dried by percolation through a column packed with neutral alumina and a column packed with Q5 reactant (a supported copper catalyst for scavenging oxygen) under a positive pressure of Ar. Diisopropylamine (*i*-Pr<sub>2</sub>NH), diisopropylethylamine (*i*-Pr<sub>2</sub>NEt), triethylamine (NEt<sub>3</sub>), pyridine (py), Trimethylsilyl chloride (TMSCl), 1,3-dimethyltetrahydropyrimidin-2(1H)-one (DMPU), and hexamethylphosphoramide (HMPA) were purified by distillation from CaH<sub>2</sub>. *N*-Bromosuccinimide (NBS) was purified by crystallization from water. Methyl vinyl ketone (MVK) was purified by distillation. Thionyl chloride (SOCl<sub>2</sub>) was purified by distillation. Copper iodide was purified by extracting impurities with THF *via* Soxlet and dried in vacuo at 100 °C. 2,6-lutidine was passed over a plug of basic alumina immediately prior to use. Carbon disulfide was purified by distillation immediately prior to use. Tributyltin hydride (Bu<sub>3</sub>SnH) was purified by distillation. All other commercially available solvents and reagents were used as received, unless otherwise indicated.

Solvents for workup and chromatography were: hexanes (Fisher or EMD, ACS Grade), pentane (Fisher, ACS Grade), EtOAc (Fisher, ACS Grade), chloroform (CHCl<sub>3</sub>, Fisher, ACS Grade), dichloromethane (CH<sub>2</sub>Cl<sub>2</sub>, Fisher, ACS Grade), and diethyl ether (Et<sub>2</sub>O, Fisher, ACS Grade). Analytical thin layer chromatography was performed on 0.25 mm EMD glass-backed TLC plates impregnated with a fluorescent dye and visualized with UV light (254 or 210 nm) and KMnO<sub>4</sub> in K<sub>2</sub>CO<sub>3</sub>/NaOH/H<sub>2</sub>O, *p*-anisaldehyde in ethanol/aqueous H<sub>2</sub>SO<sub>4</sub>/AcOH, or phosphomolybdic acid (PMA) staining solutions. Forced flow (flash) chromatography was performed on EMD Silica 60, mesh 0.04-0.063 silica gel. Yields refer to chromatographically and spectroscopically homogeneous materials, unless otherwise stated.

NMR spectra were recorded on Bruker 500 MHz and Bruker 600 MHz instruments, obtained at 298 K unless otherwise noted and referenced to residual chloroform (7.26 ppm, <sup>1</sup>H) or to CDCl<sub>3</sub> (77.16 ppm, <sup>13</sup>C). Chemical shifts are reported in ppm with the following abbreviations to explain multiplicities: s = singlet, d = doublet, t = triplet, q = quartet, quin = quintuplet, bs = broad singlet, m = multiplet. All coupling constants are apparent *J* values measured at the indicated field strengths and reported in Hertz (Hz). FT-IR spectra were recorded on a Perkin-Elmer spectrum RX1 spectrometer. High-resolution mass spectra (HRMS) were recorded on a Waters LCT Premier spectrometer using ESI-TOF (electrospray ionization-time of flight) or a Waters GCT Premier Micromass GC-MS (chemical ionization), and data are reported in the form of (*m/z*). Melting points were measured on a MEL-TEMP II capillary apparatus and stand uncorrected.

### Method for Predicting <sup>13</sup>C Chemical shifts

All calculations on structures **78**, **79**, **80**, and **81** were performed using Spartan 18 in the gas phase. First, a distribution of conformers was calculated with Molecular Mechanics MMFF. All conformers exceeding 13 kcal/mol were discarded. The remaining conformers were subjected to an equilibrium geometry calculation using HF/3-21G and then assigned an alignment score. Any duplicates (conformers that shared an align score and relative energy) were discarded as well as any conformers exceeding 5 kcal/mol. All remaining conformers were refined using a single point energy calculation with ωB97X-D/6-31G\* and all conformers exceeding 3 kcal/mol were discarded. Remaining conformers were subject to final energy refinement with ωB97XD/6-311+G(2df,2p)[6-311G\*]

with NMR prediction using  $\omega$ B97X-D/6-31G\*. Each of the conformers were assigned a Boltzmann weight and the Boltzmann averaged  $^{13}\text{C}$  shifts are reported.

#### Experimental Procedures and Characterization Data

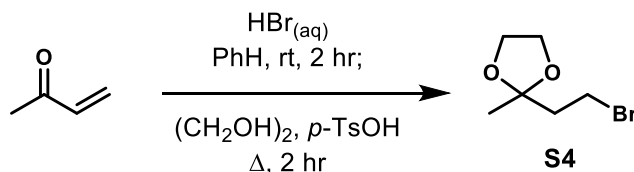

To a 3 L round bottom flask equipped with a stir bar was added benzene (1.20 L), butenone (100 mL, 1.20 mol), and  $\text{HBr}_{(\text{aq})}$  (48% w/v, 404 mL, 2.40 mol). The reaction mixture was allowed to stir vigorously at room temperature for 2 hours, then transferred to a separatory funnel and washed with saturated  $\text{NaHCO}_{3(\text{aq})}$  (3 x 750 mL) and brine (1 x 750 mL). The organic extracts were dried over  $\text{MgSO}_4$  and filtered into a 3 L round bottom flask equipped with stir bar. Neat ethylene glycol (70.5 mL, 1.26 mol) and *p*-TsOH (5.70 g, 30.0 mmol) were added to the reaction vessel, which was then equipped with a Dean–Stark apparatus and heated to reflux *via* oil bath. After stirring at reflux for two hours, the reaction mixture was allowed to cool to room temperature, then quenched with saturated  $\text{NaHCO}_{3(\text{aq})}$  (750 mL), diluted with pentane (1 L), and partitioned. The organic extracts were washed with water (7 x 600 mL) and brine (2 x 600 mL), dried over  $\text{MgSO}_4$ , filtered, and gently concentrated *in vacuo*. The crude product was purified by distillation under reduced pressure (10 torr, 62 °C) affording **bromoketal S4** (46.8 g, 20%) as a colorless liquid. The characterization data obtained are in good agreement with those previously reported.<sup>4</sup>

#### **bromoketal S4**

$^1\text{H}$  NMR (500 MHz,  $\text{CDCl}_3$ )  $\delta$  3.98-3.83 (m, 4H), 3.42-3.31 (m, 2H), 2.29-2.17 (m, 2H), 1.29 (s, 3H) ppm;  $^{13}\text{C}$  NMR (125 MHz,  $\text{CDCl}_3$ )  $\delta$  109.1, 64.9, 42.8, 27.0, 24.1 ppm; HRMS (CI) calculated for  $\text{C}_6\text{H}_{11}\text{BrO}_2$   $[\text{M}+\text{H}]^+$  195.0021 found 195.0023.

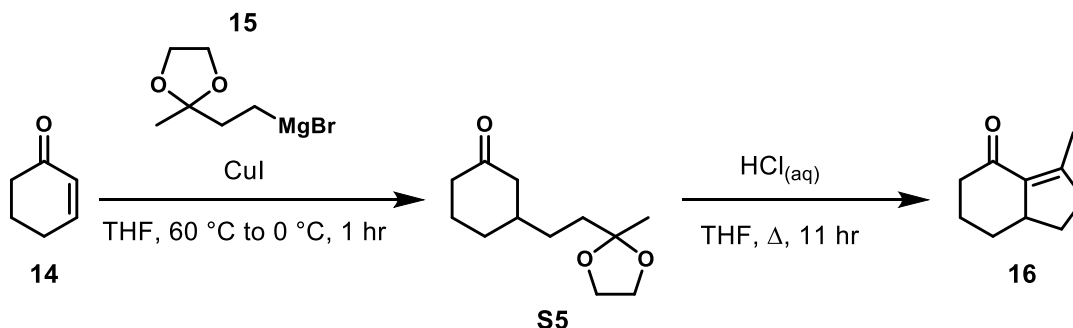

To a 3-necked 500 mL round bottom flask equipped with a stir bar, an addition funnel, and an internal thermometer was added magnesium powder (20-230 mesh, 8.81 g, 362 mmol). The flask was then flame-dried under high vacuum while stirring and allowed to cool to room temperature under an atmosphere of argon. THF (120 mL) and dibromoethane (0.6 mL) were added. The resultant slurry was sonicated for one minute, heated slightly with a heat gun, then stirred vigorously at room temperature until a gray precipitate was observed (ca. 30 min). The reaction vessel was placed in a room temperature water bath. A solution of **bromoketal S4** (24.0 g, 123 mmol) and dibromoethane (1.8 mL) in THF (36 mL) was added dropwise *via* addition funnel at a rate sufficient to maintain an internal temperature of 20 °C. Ice was added to the bath as necessary to maintain the internal temperature at 20 °C throughout the course of the addition. The reaction mixture was then allowed to stir for 30 minutes at an internal temperature of 20 °C. Stirring was halted, and the precipitate was allowed to settle (ca. 15 min). The supernatant containing **Grignard reagent 15** was transferred *via* cannula into a flame dried 2-necked 50 mL round bottom flask equipped with stir bar, rinsing with THF (2 x 5 mL). The solution was then cooled to -30 °C (internal temperature) *via*  $\text{MeOH}/\text{H}_2\text{O}/\text{CO}_{2(\text{s})}$  bath and freshly purified CuI (229 mg, 1.20 mmol) was added in one portion. The reaction mixture was allowed to stir for 30 minutes at -30 °C (internal temperature). The reaction mixture was then cooled to -60 °C (internal temperature) *via*  $\text{Me}_2\text{CO}/\text{CO}_{2(\text{s})}$  bath. A solution of **cyclohexanone 14** (7.02 mL, 72.5 mmol) in THF (24 mL)

was added dropwise *via* addition funnel at a rate sufficient to maintain an internal temperature below  $-60\text{ }^{\circ}\text{C}$ . A color change from white to yellow to orange was observed over the course of the addition. Upon completion of the addition, the reaction vessel was then allowed to stir while slowly warming to  $0\text{ }^{\circ}\text{C}$  over a period of 1 hour. During this period, a color change from orange to black was observed. After 1 hour, the reaction was quenched at  $0\text{ }^{\circ}\text{C}$  by the addition of 4:1  $\text{NH}_4\text{Cl}_{(\text{aq})}$ :1 M  $\text{NaOH}_{(\text{aq})}$  (300 mL) then allowed to warm to room temperature. The mixture was diluted with water until precipitated salts were dissolved, and extracted with  $\text{Et}_2\text{O}$  (480 mL, then 120 mL). The organic extracts were washed with water (2 x 180 mL). The water layers were back extracted with  $\text{Et}_2\text{O}$  (120 mL). The organic extracts were washed with brine, dried over  $\text{MgSO}_4$ , filtered, and concentrated *in vacuo*. Crude **keto dioxolane S5** was carried forward without further purification.

To a 2 L round bottom flask equipped with stir bar containing crude **keto dioxolane S5** was added THF (362 mL) followed by 2 M  $\text{HCl}_{(\text{aq})}$  (362 mL). The reaction vessel was heated to  $75\text{ }^{\circ}\text{C}$  *via* oil bath and allowed to stir at  $75\text{ }^{\circ}\text{C}$  for 11 hours. Upon consumption of starting material as indicated by TLC analysis, the reaction vessel was allowed to cool to room temperature. The phases were partitioned, and the aqueous layer was extracted with  $\text{Et}_2\text{O}$  (540 mL) and  $\text{EtOAc}$  (180 mL). The organic extracts were washed with saturated  $\text{NaHCO}_3_{(\text{aq})}$  (240 mL) and brine (180 mL), dried over  $\text{MgSO}_4$ , filtered, and concentrated *in vacuo*. The crude product was purified by column chromatography ( $\text{SiO}_2$ , 5% to 10%  $\text{Et}_2\text{O}$  in hexanes, stepped gradient) affording **hydrindenone 16** (9.59 g, 88% overall) as a colorless oil.

### hydrindenone 16

$^1\text{H NMR}$  (500 MHz,  $\text{CDCl}_3$ )  $\delta$  2.81–2.70 (m, 1H), 2.53–2.39 (m, 2H), 2.30–2.18 (m, 2H), 2.18–2.10 (m, 1H), 2.10–2.05 (s, 3H), 2.05–2.00 (m, 1H), 2.00–1.93 (m, 1H), 1.80–1.69 (m, 1H), 1.46 (quint, 1H,  $J = 10.6\text{ Hz}$ ), 1.22 (qd, 1H,  $J = 20.7, 3.0$ ) ppm;  $^{13}\text{C NMR}$  (125 MHz,  $\text{CDCl}_3$ )  $\delta$  200.8, 153.1, 135.9, 47.3, 41.5, 38.7, 32.4, 31.5, 24.4, 16.4 ppm; IR (thin film)  $\nu_{\text{max}}$  2926, 2859, 1677, 1619, 1260  $\text{cm}^{-1}$ ; HRMS (ESI+) calculated for  $\text{C}_{10}\text{H}_{14}\text{O}$   $[\text{M}+\text{H}]^+$  151.1123 found 151.1117.

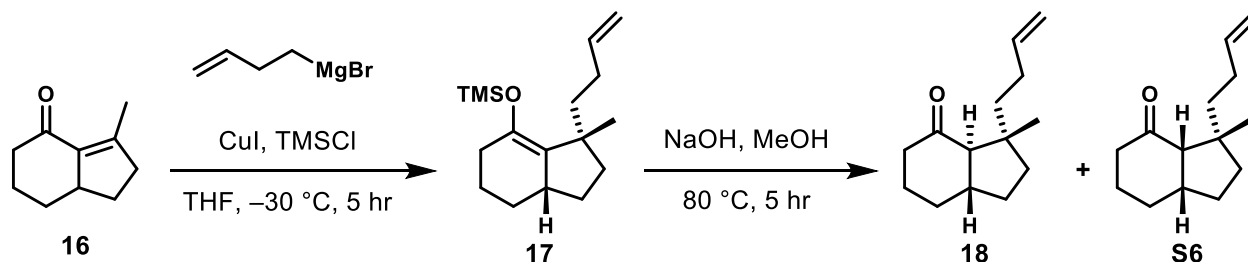

To a 25 mL round bottom flask equipped with a stir bar was added magnesium powder (20–230 mesh, 255 mg, 105 mmol). The flask was then flame dried under high vacuum and allowed to cool to room temperature under an atmosphere of argon. THF (5 mL) and dibromoethane (20  $\mu\text{L}$ ) were added. The resultant slurry was sonicated for one minute, then stirred vigorously until a gray precipitate was observed (ca. 30 min). Neat 4-bromobutene (3.55 mL, 350 mmol) was added slowly until an exotherm was observed indicating formation of the desired Grignard reagent. THF (30 mL) was then added, followed by dropwise addition of the remaining 4-bromobutene. The flask was then submerged in a  $10\text{--}15\text{ }^{\circ}\text{C}$  water/ice bath to cool the exotherm. Upon completion of the addition, the slurry was stirred for a further 1 hour at room temperature. Stirring was halted, and the precipitate was allowed to settle (ca. 15 min). The resulting solution of 4-butenylmagnesium bromide was titrated, and a concentration of 0.75 M was observed. To a 25 mL round bottom flask equipped with stir bar was added THF (5.3 mL) and 4-butenylmagnesium bromide (0.75 M, 2.7 mL, 2.0 mmol). The reaction vessel was cooled to  $-30\text{ }^{\circ}\text{C}$  *via*  $\text{Me}_2\text{CO}/\text{CO}_2_{(\text{s})}$  bath. Freshly purified  $\text{CuI}$  (190 mg, 1.0 mmol) was added to the reaction vessel. The reaction was allowed to stir at  $-30\text{ }^{\circ}\text{C}$  for 30 minutes. The reaction vessel was then cooled to  $-78\text{ }^{\circ}\text{C}$  *via*  $\text{Me}_2\text{CO}/\text{CO}_2_{(\text{s})}$  bath. Neat  $\text{TMSCl}$  (0.20 mL, 1.6 mmol) was added dropwise *via* syringe to the reaction vessel. A solution of **hydrindenone 16** (100 mg, 0.667 mmol) in THF (1 mL) was then added dropwise *via* syringe to the reaction vessel. The reaction vessel was allowed to warm to  $-30\text{ }^{\circ}\text{C}$  and allowed to stir at  $-30\text{ }^{\circ}\text{C}$  for 5 hours. The vessel was then allowed to warm to  $0\text{ }^{\circ}\text{C}$  by submersion in an ice bath and the reaction was quenched at  $0\text{ }^{\circ}\text{C}$  by the dropwise addition of 2:1  $\text{NH}_4\text{Cl}_{(\text{aq})}$ :1 M  $\text{NaOH}_{(\text{aq})}$  (12 mL). The mixture was allowed to warm to room temperature, stirring open to air until a clear solution was observed (ca. 15 minutes). The aqueous layer was extracted with  $\text{EtOAc}$  (10 mL). The organic extracts were washed with 2:1  $\text{NH}_4\text{Cl}_{(\text{aq})}$ :1 M  $\text{NaOH}_{(\text{aq})}$  (3 mL), water (3 mL), and brine (3 mL), dried over  $\text{MgSO}_4$ , filtered, and concentrated *in vacuo*. The crude material was filtered through a plug of  $\text{NEt}_3$  treated Florisil<sup>®</sup>, rinsing with hexanes/ $\text{NEt}_3$ .

(99:1 v/v ratio). The filtrate was concentrated *in vacuo*, affording crude **enoxysilane 17** (145 mg, 78%) as a mixture of diastereomers (8:1 *dr*). The crude material was carried forward without further purification.

To a 10 mL round bottom flask equipped with stir bar was added crude **enoxysilane 17** (140 mg, 0.50 mmol) and 0.13 M NaOH<sub>(MeOH)</sub> (5 mL, 0.65 mmol). The flask was equipped with a reflux condenser then heated to 80 °C *via* oil bath. The reaction mixture was allowed to stir at 80 °C for 5 hours then allowed to cool to room temperature. The reaction mixture was concentrated *in vacuo*. The crude residue was dissolved in EtOAc (10 mL) and 1:1 NH<sub>4</sub>Cl<sub>(aq)</sub>:water (5 mL) and the layers were partitioned. The aqueous layer was extracted with EtOAc (5 mL). The organic extracts were washed with brine (3 mL), dried over MgSO<sub>4</sub>, filtered, and concentrated *in vacuo*. The crude product was purified by column chromatography (SiO<sub>2</sub>, 1% Et<sub>2</sub>O in hexanes) affording **trans-hydrindanone 18** (54 mg, 51%, >20:1 *dr*) as a colorless oil and **cis-hydrindanone S6** (30 mg, 29%, 2:1 *dr*) as a colorless oil.

#### **trans-hydrindanone 18**

<sup>1</sup>H NMR (500 MHz, CDCl<sub>3</sub> at 7.27 ppm) δ 5.80 (ddt, 1H, *J* = 17.1, 10.3, 6.6), 4.98 (dq, 1H, *J* = 17.1, 1.7), 4.90 (d, 1H, *J* = 10.3), 2.26 (d, 1H, *J* = 14.4 Hz), 2.22-2.13 (m, 1H), 2.13-1.95 (m, 5H), 1.91-1.82 (m, 2H), 1.74 (td, 1H, *J* = 18.8, 5.0 Hz), 1.71-1.60 (m, 1H), 1.57-1.50 (m, 1H), 1.41-1.20 (m, 4H), 1.09 (s, 3H) ppm; <sup>13</sup>C NMR (125 MHz, CDCl<sub>3</sub>) δ 210.9, 139.8, 113.9, 64.9, 45.0, 42.6, 42.3, 41.8, 37.8, 31.9, 29.9, 29.2, 27.1, 22.2 ppm; IR (thin film) ν<sub>max</sub> 3076, 2932, 2865, 1711, 1640 cm<sup>-1</sup>; HRMS (ESI+) calculated for C<sub>14</sub>H<sub>22</sub>O [M+NH<sub>4</sub>]<sup>+</sup> 224.2014 found 224.2010.

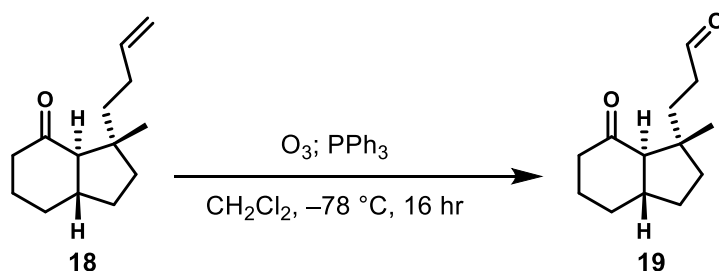

To a 100 mL round bottom flask equipped with a stir bar was added a solution of **trans-hydrindanone 18** (847 mg, 4.11 mmol) in CH<sub>2</sub>Cl<sub>2</sub> (41 mL). The reaction vessel was cooled to -78 °C *via* Me<sub>2</sub>CO/CO<sub>2(s)</sub> bath. Ozone gas was then bubbled through the solution until saturation. A color change to blue was observed. O<sub>2</sub> was then bubbled through the solution until the blue color dissipated. Triphenylphosphine (1.18 g, 4.52 mmol) was added to the reaction vessel. The vessel was then allowed to warm to room temperature. The reaction mixture was allowed to stir at room temperature for 16 hours, then passed through a plug of SiO<sub>2</sub> rinsing with Et<sub>2</sub>O. The filtrate was concentrated *in vacuo*. The crude product was purified by column chromatography (SiO<sub>2</sub>, 30% Et<sub>2</sub>O in hexanes) affording **keto aldehyde 19** (787 mg, 92%) as a colorless oil.

#### **keto aldehyde 19**

<sup>1</sup>H NMR (500 MHz, CDCl<sub>3</sub>) δ 9.75 (t, 1H, *J* = 1.7 Hz), 2.55 (dddd, 1H, *J* = 17.2, 10.3, 5.4, 1.7 Hz), 2.42 (dddd, 1H, *J* = 17.2, 10.3, 5.4, 1.7 Hz), 2.30-2.23 (m, 1H), 2.17 (tdd, 1H, *J* = 13.3, 6.2, 1.0), 2.10-2.00 (m, 3H), 1.95 (ddd, 1H, *J* = 13.8, 10.3, 5.8), 1.87 (dt, 1H, *J* = 12.1, 8.0), 1.70-1.57 (m, 2H), 1.53-1.46 (m, 1H), 1.43-1.29 (m, 3H), 1.03 (s, 3H) ppm; <sup>13</sup>C NMR (126 MHz, CDCl<sub>3</sub>) δ 211.1, 203.4, 65.1, 45.5, 42.8, 42.1, 41.0, 38.5, 34.7, 32.0, 29.1, 27.3, 22.0 ppm; IR (thin film) ν<sub>max</sub> 3175, 2937, 2866, 2719, 1708 cm<sup>-1</sup> (aldehyde and ketone are overlapping); HRMS (ESI+) calculated for C<sub>13</sub>H<sub>20</sub>O<sub>2</sub>Na [M+Na]<sup>+</sup> 231.1361 found 231.1365.

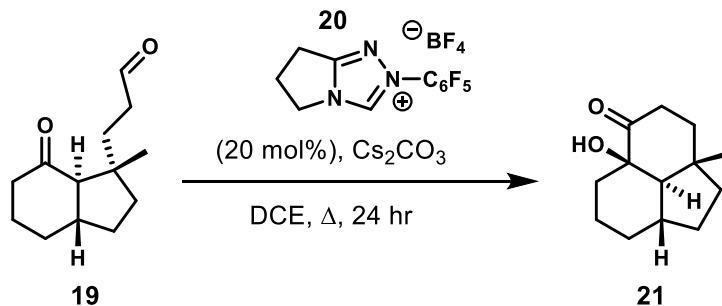

To a 3-necked 500 mL round bottom flask equipped with a stir bar and a reflux condenser was added Rovis's precatalyst **20**<sup>5</sup> (182 mg, 0.500 mmol), Cs<sub>2</sub>CO<sub>3</sub> (160 mg, 0.500 mmol), and DCE (83 mL). The mixture was allowed to stir at room temperature for 30 minutes. A color change from yellow to orange was observed. A solution of **keto aldehyde 19** (348 mg, 1.67 mmol) in DCE (42 mL) was added to the reaction mixture. The reaction mixture was heated to reflux *via* oil bath. The reaction mixture was allowed to stir while heated for 24 hours. Upon consumption of starting material as indicated by TLC analysis, the reaction mixture was allowed to cool to room temperature, then quenched by the addition of NH<sub>4</sub>Cl<sub>(s)</sub>. The quenched reaction mixture was filtered through SiO<sub>2</sub>, rinsing with Et<sub>2</sub>O. The filtrate was concentrated *in vacuo*. The crude product was purified by column chromatography (SiO<sub>2</sub>, 20% to 30% Et<sub>2</sub>O in hexanes, stepped gradient) affording **hydroxyketone 21** (240 mg, 69%) as a white solid. **Hydroxyketone 21** was crystallized \*\*\*conditions to afford X-ray quality crystals.

In some cases, an inseparable impurity co-elutes with the product. If this is the case, the impurity can be removed *via* trituration with cold hexanes to afford pure **hydroxyketone 21**.

#### hydroxyketone 21

<sup>1</sup>H NMR (500 MHz, CDCl<sub>3</sub>),  $\delta$  3.0 (dd, 1H,  $J = 15.0, 14.0, 6.1$  Hz), 2.20 (dq, 1H,  $J = 15.0, 2.1$  Hz), 2.11-1.92 (m, 4H), 1.73-1.64 (m, 2H), 1.64-1.51 (m, 3H), 1.45-1.37 (m, 1H) ppm; <sup>13</sup>C NMR (126 MHz, CDCl<sub>3</sub>)  $\delta$  211.1, 76.8, 70.0, 39.8, 39.6, 35.2, 33.5, 32.9, 32.7, 28.7, 22.0, 20.0 ppm; IR (thin film)  $\nu_{\text{max}}$  3452, 2931, 2862, 1708 cm<sup>-1</sup>; m.p. = 84–85 °C; HRMS (–ESI) calculated for C<sub>13</sub>H<sub>19</sub>O<sub>2</sub> [M–H]<sup>–</sup> 207.1385 found [M–H]<sup>–</sup> = 207.1379.

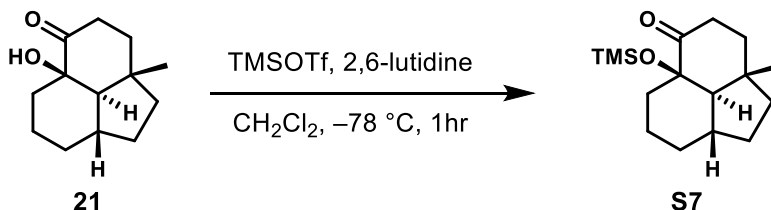

To a 50 mL round bottom flask equipped with a stir bar was added a solution of **hydroxyketone 21** (191 mg, 0.92 mmol) in CH<sub>2</sub>Cl<sub>2</sub> (9.2 mL). The reaction vessel was cooled to –78 °C *via* Me<sub>2</sub>CO/CO<sub>2</sub>(<sub>s</sub>) bath. 2,6-lutidine (540  $\mu$ L, 4.59 mmol) and TMSOTf (420  $\mu$ L, 2.29 mmol) were added to the reaction vessel at –78 °C. The reaction mixture was allowed to stir at –78 °C for 1 hour. Upon consumption of starting material as indicated by TLC analysis, the reaction was quenched by the addition of a solution of NEt<sub>3</sub> in MeOH (20 v/v%, 1 mL) at –78 °C. The reaction mixture was allowed to warm to room temperature then diluted with saturated NH<sub>4</sub>Cl (10 mL) and CH<sub>2</sub>Cl<sub>2</sub> (10 mL). The layers were partitioned, and the aqueous layer was extracted with CH<sub>2</sub>Cl<sub>2</sub> (20 mL). The organic extracts were dried over MgSO<sub>4</sub>, filtered, and concentrated *in vacuo*. The crude product was purified by column chromatography (SiO<sub>2</sub>, 2% Et<sub>2</sub>O in hexanes) affording **TMS-protected alcohol S7** (245 mg, 95%) as a colorless oil.

#### TMS-protected alcohol S7

<sup>1</sup>H NMR (500 MHz, CDCl<sub>3</sub>),  $\delta$  2.99 (td, 1H,  $J = 21.0, 6.0$  Hz), 2.15 (ddd, 1H,  $J = 14.1, 4.2, 2.4$  Hz), 2.10-2.004 (m, 1H), 1.98-1.87 (m, 3H), 1.78 (dt, 1H,  $J = 14.1, 2.9$ ), 1.66-1.46 (m, 3H), 1.42-1.31 (m, 2H), 1.30-1.17 (m, 2H), 1.16 (s, 3H), 0.88 (qd, 1H,  $J = 21.0, 3.7$  Hz), 0.85 (d, 1H, 12.4 Hz), 0.07 (s, 9H) ppm; <sup>13</sup>C NMR (126 MHz, CDCl<sub>3</sub>)  $\delta$  213.8, 79.8, 63.0, 40.6, 39.7, 39.2, 35.6, 33.5, 33.0, 31.7, 28.8, 22.2, 20.0,



1.7 ppm; IR (thin film)  $\nu_{\max}$  2933, 2864, 1746  $\text{cm}^{-1}$ ; HRMS (ESI+) calculated for  $\text{C}_{16}\text{H}_{28}\text{O}_2\text{SiNa}$   $[\text{M}+\text{Na}]^+$  303.1756 found  $[\text{M}+\text{H}]^+ = 303.1747$ .

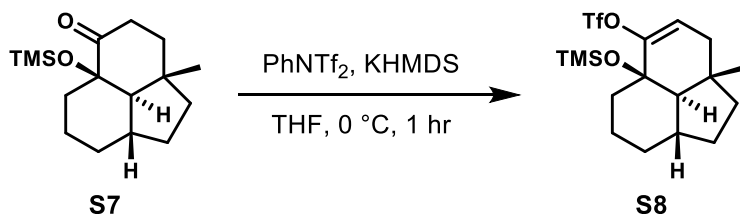

To a 100 mL round bottom flask equipped with a stir bar was added a solution of **TMS-protected alcohol S7** (245 mg, 0.875 mmol) and  $\text{PhNTf}_2$  (626 mg, 1.75 mmol) in THF (20.2 mL). The reaction vessel was cooled to  $0\text{ }^\circ\text{C}$  *via* ice bath. KHMDS (0.44 M in PhMe, 2.97 mL, 1.31 mmol) was added dropwise *via* syringe to the reaction vessel. The reaction mixture was allowed to stir at  $0\text{ }^\circ\text{C}$  for 1 hour. Upon consumption of starting material as indicated by TLC analysis, the reaction was quenched by the addition of saturated  $\text{NaHCO}_3(\text{aq})$  (20 mL). The aqueous layer was extracted with  $\text{Et}_2\text{O}$  (3 x 40 mL). The organic extracts were dried over  $\text{MgSO}_4$ , filtered, and concentrated *in vacuo*. The crude product was purified by column chromatography ( $\text{SiO}_2$ , hexanes) affording **alkenyl triflate S8** (336 mg, 93%) as a colorless oil.

#### alkenyl triflate S8

$^1\text{H NMR}$  (600 MHz,  $\text{CDCl}_3$ )  $\delta$  5.77 (dd, 1H,  $J = 5.6, 2.4$  Hz), 2.28 (dd, 1H,  $J = 17.6, 5.6$  Hz), 2.15 (dd, 1H,  $J = 17.6, 2.0$  Hz), 2.07-1.88 (m, 4H), 1.69-1.60 (m, 2H), 1.55 (ddd, 1H,  $J = 12.8, 9.2, 3.6$  Hz), 1.42 (td, 1H,  $J = 12.8, 6.1$  Hz), 1.31-1.23 (m, 2H), 1.16 (d, 1H, 12.8 Hz), 1.06-0.97 (m, 1H), 0.96 (s, 3H), 0.12 (s, 9H) ppm;  $^{13}\text{C NMR}$  (126 MHz,  $\text{CDCl}_3$ )  $\delta$  152.8, 120.8, 118.6 (q,  $J = 318$  Hz), 73.2, 60.7, 40.3, 39.8, 37.5, 34.4, 37.5, 33.2, 33.2, 29.0, 22.1, 21.7, 1.6 ppm; IR (thin film)  $\nu_{\max}$  3456, 3404, 2955, 2937, 2867, 1651, 1456, 1417, 1341, 1249, 1144; HRMS (ESI+) calculated for  $\text{C}_{17}\text{H}_{27}\text{F}_3\text{O}_4\text{SSiNa}$   $[\text{M}+\text{Na}]^+$  435.1249 found  $[\text{M}+\text{Na}]^+ 435.1252$ .

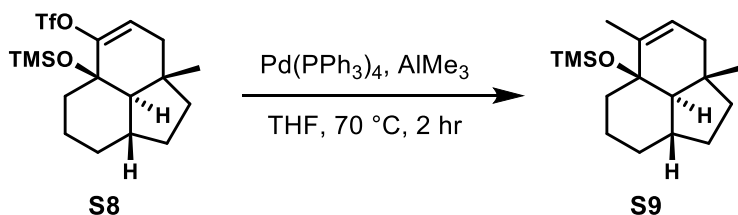

To a 100 mL round bottom flask equipped with a stir bar was added **alkenyl triflate S8** (815 mg, 1.98 mmol) and degassed THF (9.9 mL). The reaction vessel was cooled to  $0\text{ }^\circ\text{C}$  *via* ice bath. A solution of  $\text{Pd(PPh}_3)_4$  in degassed THF (9.9 mL) was added to the reaction mixture at  $0\text{ }^\circ\text{C}$ . The reaction mixture was allowed to stir at  $0\text{ }^\circ\text{C}$  for 5 minutes, then  $\text{AlMe}_3$  (2.0 M in heptane, 4.94 mL, 9.88 mmol) was added dropwise *via* syringe at  $0\text{ }^\circ\text{C}$ . The reaction mixture was allowed to stir at  $0\text{ }^\circ\text{C}$  for 5 minutes, then allowed to warm to room temperature. Upon warming to room temperature, the reaction vessel was equipped with a reflux condenser. The reaction vessel was then heated to  $70\text{ }^\circ\text{C}$  *via* oil bath. The reaction mixture was allowed to stir at  $70\text{ }^\circ\text{C}$  for 2 hours. Upon consumption of starting material as indicated by TLC analysis, the reaction vessel was cooled to  $0\text{ }^\circ\text{C}$ . The reaction was quenched at  $0\text{ }^\circ\text{C}$  by the dropwise addition of saturated  $\text{NaHCO}_3(\text{aq})$  (25 mL). The mixture was allowed to warm to room temperature, and saturated Rochelle's salt (25 mL) was added. The mixture was allowed to stir vigorously at room temperature for 2 hours, then extracted with  $\text{Et}_2\text{O}$  (3 x 100 mL). The organic extracts were dried over  $\text{MgSO}_4$ , filtered, and concentrated *in vacuo*. The crude product was purified by column chromatography ( $\text{SiO}_2$ , hexanes) affording **alkene S9** (479 mg, 87%) as a colorless oil.

#### alkene S9

$^1\text{H NMR}$  (600 MHz,  $\text{CDCl}_3$ )  $\delta$  5.36 (tq, 1H,  $J = 3.6, 1.4$  Hz), 2.10 (ddq, 1H,  $J = 17.2, 5.1, 1.4$  Hz), 2.00-1.80 (m, 5H), 1.75 (quint, 1H,  $J = 1.4$  Hz), 1.66 (qt, 1H,  $J = 13.0, 3.9$  Hz), 1.58 (dt, 1H,  $J = 13.3, 2.3, 4.5$  Hz), 1.49 (ddd, 1H,  $J = 12.5, 9.0, 3.6$  Hz), 1.34 (td, 1H,  $J = 12.5, 6.0$  Hz), 1.16 (tdd, 1H,  $J = 12.5, 8.0, 3.6$  Hz), 1.03 (td, 1H, 13.3, 4.5), 0.95 (qd, 1H,  $J = 12.5, 4.5$  Hz), 0.89 (s, 3H), 0.09 (s, 9H) ppm;  $^{13}\text{C NMR}$  (150

MHz, CDCl<sub>3</sub>),  $\delta$  136.8, 125.9, 74.1, 59.8, 42.7, 40.8, 37.6, 36.1, 33.8, 33.7, 28.6, 22.8, 22.1, 18.0, 2.4 ppm; IR (thin film)  $\nu_{\max}$  3405 (br), 3010, 2945, 2863, 2671, 2359, 2339, 2091, 1644 cm<sup>-1</sup>; HRMS (CI) calculated for C<sub>17</sub>H<sub>30</sub>OSi [M]<sup>+</sup> 278.2066 found [M]<sup>+</sup> 278.2060.

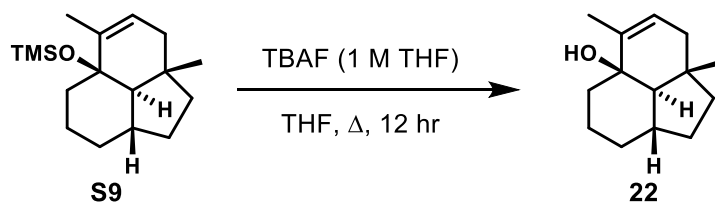

To a 50 mL round bottom flask equipped with a stir bar was added a solution of **alkene S9** (479 mg, 1.72 mmol) in THF (8.6 mL) followed by TBAF (1.0 M in THF, 8.6 mL, 8.6 mmol). The reaction mixture was heated to reflux *via* oil bath. The reaction mixture was allowed to stir while at reflux for 12 hours. Upon consumption of starting material as indicated by TLC analysis, the reaction vessel was cooled to room temperature. The reaction mixture was filtered through a plug of SiO<sub>2</sub>, rinsing with Et<sub>2</sub>O. The filtrate was concentrated *in vacuo*. The crude product was purified by column chromatography (SiO<sub>2</sub>, 6% Et<sub>2</sub>O in hexanes) affording **allylic alcohol 22** (356 mg, 99%) as a colorless oil.

#### allylic alcohol 22

<sup>1</sup>H NMR (600 MHz, CDCl<sub>3</sub>),  $\delta$  5.38 (tq, 1H, *J* = 3.6, 1.4 Hz), 2.12 (ddq, 1H, *J* = 17.0, 5.5, 1.2 Hz), 2.04-1.87 (m, 4H), 1.84 (ddd, 1H, *J* = 13.2, 3.7, 3.0 Hz), 1.74 (quint, 3H, *J* = 1.3 Hz), 1.69 (dtd, 1H, *J* = 12.7, 3.7, 1.0), 1.66 (dtt, 1H, *J* = 13.8, 2.8, 4.7 Hz), 1.54 (ddd, 1H, *J* = 12.7, 9.1, 3.7), 1.40 (td, 1H, *J* = 12.7, 6.1), 1.22 (tdd, 1H, *J* = 12.7, 8.0, 3.7 Hz) ppm; <sup>13</sup>C NMR (150 MHz, CDCl<sub>3</sub>),  $\delta$  138.1, 124.7, 71.6, 58.7, 42.2, 40.6, 37.6, 36.0, 33.8, 33.7, 28.5, 22.6, 21.6, 16.5 ppm; IR (thin film)  $\nu_{\max}$  3625, 3499 (br), 3009, 2933, 2862, 1714, 1642 cm<sup>-1</sup>; HRMS (ESI<sup>+</sup>) calculated for C<sub>14</sub>H<sub>21</sub> [M-OH]<sup>+</sup> 189.1643 found [M-OH]<sup>+</sup> 189.1637.

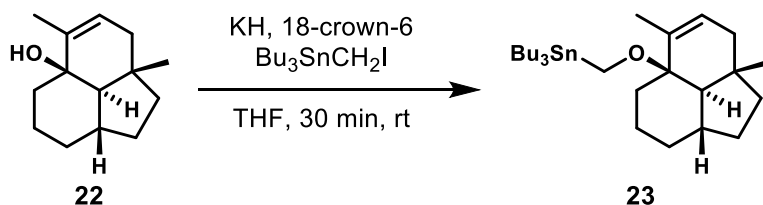

To a 2-dram vial equipped with a stir bar was added KH (30 wt % in mineral oil, 40 mg, 0.296 mmol). The solids were slurried in hexanes (1 mL) then allowed to settle to the bottom of the vessel and the supernatant was removed *via* syringe. This process was repeated three times to ensure the removal of mineral oil from the reaction vessel. THF (1 mL) was added to the reaction vessel and the mixture was allowed to stir at room temperature until a suspension was formed. The reaction vessel was cooled to 0 °C *via* ice bath. A solution of **allylic alcohol 22** (30.5 mg, 0.148 mmol) in THF (250  $\mu$ L) was added to the reaction vessel dropwise *via* syringe at 0 °C. The reaction mixture was allowed to warm to room temperature. 18-crown-6 (46.9 mg, 0.178 mmol) was added to the reaction mixture at room temperature, and the reaction mixture was allowed to stir at room temperature for 1 hour. A solution of Bu<sub>3</sub>SnCH<sub>2</sub>I (63.8 mg, 0.148 mmol) in THF (250  $\mu$ L) was added dropwise *via* syringe to the reaction vessel, and the reaction mixture was allowed to stir at room temperature for 30 minutes. Upon consumption of starting material as indicated by TLC analysis, the reaction was quenched at room temperature by the addition of saturated NH<sub>4</sub>Cl<sub>(aq)</sub> (3 mL). The mixture was extracted with Et<sub>2</sub>O (3 x 6 mL). The organic extracts were dried over MgSO<sub>4</sub>, filtered, and concentrated *in vacuo*. The crude product was purified by column chromatography (SiO<sub>2</sub>, hexanes) affording **stannylmethyl ether 23** (67.1 mg, 89%) as a colorless oil.

#### stannylmethyl ether 23

<sup>1</sup>H NMR (600 MHz, CDCl<sub>3</sub>),  $\delta$  5.46 (ddd, 1H, *J* = 4.5, 2.5, 1.5), 3.67 (td, 1H, *J* = 11.9, 8.9 Hz), 3.58 (q, 1H, *J* = 8.9 Hz), 2.31 (dt, 1H, *J* = 13.8, 3.9 Hz), 2.10 (ddq, 1H, *J* = 17.4, 4.5, 1.5), 2.04-1.96 (m, 1H), 1.96-1.88 (m, 2H), 1.86 (quint, 3H, *J* = 1.0 Hz), 1.85-1.80 (m, 1H), 1.59-1.40 (m, 8H), 1.35-1.24 (m, 6H), 1.13 (tdd, 1H, *J* = 12.5, 8.0, 4.0), 1.05-0.69 (m, 15H) ppm; <sup>13</sup>C NMR (150 MHz, CDCl<sub>3</sub>)  $\delta$  136.1, 127.7, 75.9, 59.9, 52.9, 43.1, 40.8, 37.5, 33.8, 29.9, 29.4, 28.7, 27.6, 23.2, 22.8, 20.9, 13.9, 8.9 ppm; IR (thin film)  $\nu_{\max}$  2954, 2925, 2869, 2853, 1457 cm<sup>-1</sup>; HRMS (CI<sup>+</sup>) calculated for C<sub>23</sub>H<sub>41</sub>OSn [M-Bu]<sup>+</sup> 453.2184 found [M-Bu]<sup>+</sup> 453.2168.

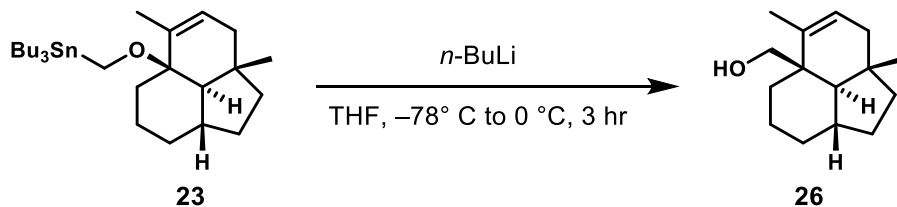

To a 1-dram vial equipped with a stir bar was added a solution of **stannylmethyl ether 23** (23.5 mg, 0.046 mmol) in THF (300  $\mu\text{L}$ ). The solution was cooled to  $-78^\circ\text{C}$  *via*  $\text{Me}_2\text{CO}/\text{CO}_2(\text{s})$  bath.  $n\text{-BuLi}$  (2.5 M in hexane, 22  $\mu\text{L}$ , 0.055 mmol) was added dropwise *via* syringe to the reaction vessel at  $-78^\circ\text{C}$ . The reaction mixture was allowed to warm slowly to  $0^\circ\text{C}$  while stirring for 3 hours. The reaction was then quenched by the addition of saturated  $\text{NH}_4\text{Cl}_{(\text{aq})}$  (1 mL). The resultant slurry was extracted with  $\text{Et}_2\text{O}$  (3 x 2 mL). The organic extracts were dried over  $\text{MgSO}_4$ , filtered, and concentrated *in vacuo*. The crude product was purified by column chromatography ( $\text{SiO}_2$ , 0% to 4%  $\text{Et}_2\text{O}$  in hexanes, stepped gradient) affording **alcohol 26** (2.1 mg 21%) as a white solid.

#### alcohol 26

$^1\text{H NMR}$  (600 MHz,  $\text{CDCl}_3$ )  $\delta$  5.34-5.31 (m, 1H), 3.91 (d, 1H,  $J = 11.0$  Hz), 3.83 (d, 1H,  $J = 11$  Hz), 2.20 (dt, 1H,  $J = 12.9, 3.3$  Hz), 2.10-1.98 (m, 2H), 1.93-1.81 (m, 2H), 1.77 (dt, 3H,  $J = 2.5, 1.4$  Hz), 1.70-1.65 (m, 1H), 1.60-1.50 (m, 2H)\*, 1.45 (qt, 1H,  $J = 13.5, 3.8$  Hz), 1.40-1.33 (m, 1H), 1.32-1.15 (m, 2H)\* 1.04-0.87 (m, 3H), 0.85 (s, 3H) ppm;  $^{13}\text{C NMR}$  (600 MHz,  $\text{CDCl}_3$ )  $\delta$  140.3, 123.3, 64.9, 59.8, 43.0, 42.5, 41.9, 37.8, 34.6, 33.9, 33.6, 29.9, 28.9, 23.2, 23.0, 19.5, 14.3 ppm; **IR** (thin film)  $\nu_{\text{max}}$  3369, 2923, 2862  $\text{cm}^{-1}$ ; **HRMS** (ESI+) calculated for  $\text{C}_{15}\text{H}_{24}\text{ONa}$   $[\text{M}+\text{Na}]^+$  243.1725 found  $[\text{M}+\text{Na}]^+$  243.1716.

\*Due to the small amount of material available, integration of multiplets in these regions were difficult to determine.

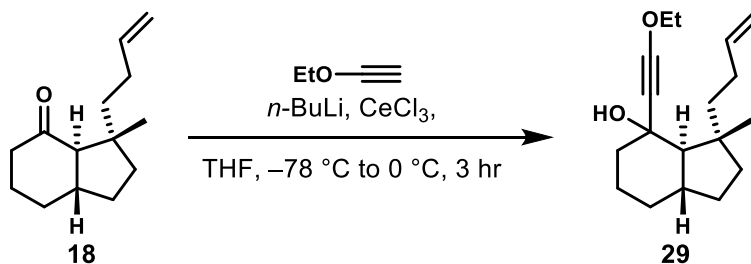

To a 25 mL round bottom flask equipped with a stir bar was added a solution of ethoxyacetylene (183  $\mu\text{L}$ , 2.09 mmol) in THF (5.3 mL). The solution was cooled to  $-78^\circ\text{C}$  *via*  $\text{Me}_2\text{CO}/\text{CO}_2(\text{s})$  bath.  $n\text{-BuLi}$  (2.6 M in hexane, 540  $\mu\text{L}$ , 1.40 mmol) was added dropwise *via* syringe at  $-78^\circ\text{C}$  to the reaction vessel. The reaction mixture was allowed to stir at  $-78^\circ\text{C}$  for 30 minutes, then allowed to warm to  $0^\circ\text{C}$  by submersion in an ice bath. The reaction mixture was allowed to stir at  $0^\circ\text{C}$  for 30 minutes, then cooled to  $-78^\circ\text{C}$ . Anhydrous  $\text{CeCl}_3$  (413 mg, 1.67 mmol) was added to the reaction mixture in a single portion under a stream of argon. The reaction mixture was allowed to stir at  $-78^\circ\text{C}$  for 30 minutes. A solution of **trans-hydrindanone 18** (57.6 mg, 0.279 mmol) in THF (200  $\mu\text{L}$ ) was added dropwise *via* syringe to the reaction vessel at  $-78^\circ\text{C}$ , rinsing with THF (100  $\mu\text{L}$ ). The reaction mixture was allowed to stir at  $-78^\circ\text{C}$ , then warmed slowly to  $0^\circ\text{C}$  while stirring over the course of 3 hours. A color change from white to light brown was observed. After 3 hours, the reaction mixture was allowed to warm to room temperature. The reaction mixture was allowed to stir at room temperature for 30 minutes, then quenched at room temperature by the addition of  $\text{NH}_4\text{Cl}_{(\text{s})}$ . The resultant slurry was allowed to stir vigorously at room temperature for 15 minutes, then diluted with hexanes (10 mL) and filtered through a plug of  $\text{SiO}_2$ , rinsing with  $\text{Et}_2\text{O}$ . The filtrate was concentrated *in vacuo*. The crude product was purified by column chromatography ( $\text{SiO}_2$ , 15% to 20%  $\text{Et}_2\text{O}$  in hexanes, stepped gradient) affording **alkynyl ether 29** (265 mg, 96%) as a colorless oil (inconsequential 1.6:1 mixture of diastereomers).

Note: individual diastereomers were isolated for characterization purposes only. Otherwise, the diastereomeric mixture was isolated together and taken onto the next step.

### major diastereomer of alkynyl ether 29

$^1\text{H NMR}$  (500 MHz,  $\text{CDCl}_3$ )  $\delta$  5.84 (ddt, 1H,  $J = 17.0, 10.3, 6.6$  Hz), 5.02 (ddd, 1H,  $J = 17.0, 3.1, 1.4$  Hz), 4.90 (ddd, 1H,  $J = 10.3, 1.7, 1.0$  Hz), 4.06 (q, 2H,  $J = 7.1$  Hz), 2.08 (dt, 2H,  $J = 8.6, 7.4$  Hz), 1.93-1.84 (m, 3H), 1.71 (dddd, 1H,  $J = 12.2, 8.7, 6.2, 2.4$  Hz), 1.67-1.49 (m, 5H), 1.35 (t, 3H,  $J = 7.1$  Hz), 1.27-1.19 (m, 2H), 1.14 (s, 3H), 1.11 (d, 1H,  $J = 12.1$  Hz), 1.05-0.91 (m, 2H) ppm;  $^{13}\text{C NMR}$  (126 MHz,  $\text{CDCl}_3$ )  $\delta$  140.1, 113.7, 93.2, 74.3, 68.3, 60.1, 44.0, 43.3, 42.8, 38.1, 38.1, 32.8, 30.0, 29.8, 25.2, 21.6, 14.6 ppm; IR (thin film)  $\nu_{\text{max}}$  3478, 3075, 2974, 2933, 2860, 2260, 1722, 1639  $\text{cm}^{-1}$ ; HRMS (ESI+) calculated for  $\text{C}_{18}\text{H}_{27}\text{O}$   $[\text{M}-\text{OH}]^+$  259.2062 found 259.2059, calculated for  $\text{C}_{18}\text{H}_{29}\text{O}_2$   $[\text{M}+\text{H}]^+$  277.2168 found 277.2163.

### minor diastereomer of alkynyl ether 29

$^1\text{H NMR}$  (500 MHz,  $\text{CDCl}_3$ )  $\delta$  5.83 (ddt, 1H,  $J = 17.0, 10.3, 6.6$  Hz), 4.99 (dq, 1H,  $J = 17.0, 1.5$  Hz), 4.89 (d, 1H,  $J = 10.3$ ), 4.07 (q, 2H,  $J = 7.1$  Hz), 2.11 (ddd, 1H,  $J = 18.8, 13.0, 6.0$  Hz), 2.04 (ddd, 1H,  $J = 18.8, 13.0, 6.0$  Hz), 1.88-1.71 (m, 5H), 1.71-1.64 (m, 1H), 1.64-1.54 (m, 2H), 1.46 (td, 1H,  $J = 12.3, 4.0$  Hz), 1.42 (td, 1H,  $J = 12.7, 4.8$  Hz), 1.36 (t, 3H, 7.1 Hz), 1.27 (dt, 1H,  $J = 13.3, 8.3$  Hz), 1.20 (s, 3H), 1.15 (d, 1H, 11.6 Hz), 1.15-1.04 (m, 1H), 0.92 (qd, 1H,  $J = 12.6, 4.3$  Hz) ppm;  $^{13}\text{C NMR}$  (126 MHz,  $\text{CDCl}_3$ )  $\delta$  140.2, 113.7, 96.3, 74.3, 72.7, 62.5, 45.7, 44.1, 41.7, 41.4, 38.4, 32.7, 29.9, 29.8, 24.8, 24.0, 14.7 ppm; IR (thin film) 3478, 3074, 2972, 2932, 2859, 2258, 1640  $\text{cm}^{-1}$ ; HRMS (ESI+) calculated for  $\text{C}_{18}\text{H}_{28}\text{O}_2\text{Na}$   $[\text{M}+\text{Na}]^+$  299.1987 found 299.1986.

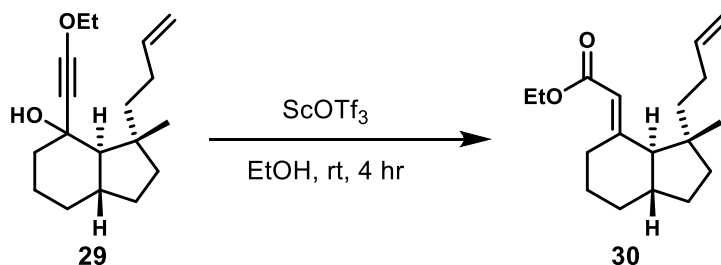

To a 50 mL round bottom flask equipped with a stir bar was added **alkynyl ether 29** (246.7 mg, 0.892 mmol),  $\text{CH}_2\text{Cl}_2$  (14.9 mL),  $\text{EtOH}$  (0.52 mL, 8.92 mmol), and  $\text{Sc}(\text{OTf})_3$  (43.9 mg, 0.0892 mmol). The reaction mixture was allowed to stir at room temperature for 4 hours, then diluted with hexanes (20 mL) and filtered through a plug of pH 7  $\text{SiO}_2$ , rinsing with  $\text{Et}_2\text{O}$ . The filtrate was concentrated *in vacuo*. The crude product was purified by column chromatography ( $\text{SiO}_2$ , 2%  $\text{Et}_2\text{O}$  in hexanes) affording **enoate ester 30** (231 mg, 94%) as a colorless oil (inconsequential 2:1 mixture of diastereomers).

Note: individual diastereomers were isolated for characterization purposes only. Otherwise, the diastereomeric mixture was isolated together and taken onto the next step.

### major diastereomer of enoate ester 30

$^1\text{H NMR}$  (500 MHz,  $\text{CDCl}_3$ )  $\delta$  5.82 (ddt, 1H,  $J = 17.0, 10.2, 6.5$  Hz), 5.78 (t, 1H,  $J = 1.5$  Hz), 4.99 (ddd, 1H,  $J = 17.0, 1.7, 1.4$  Hz), 4.89 (d, 1H,  $J = 10.2$  Hz), 4.14 (dq, 1H,  $J = 10.9, 7.1$  Hz), 4.06 (dq, 1H,  $J = 10.9, 7.1$  Hz), 2.76 (dt, 1H,  $J = 12.5, 1.4$  Hz), 2.41 (tdd, 1H,  $J = 12.2, 8.0, 1.4$  Hz), 2.14 (dddd, 1H,  $J = 25.1, 12.5, 5.8, 3.3$  Hz), 2.08-1.96 (m, 3H), 1.95-1.85 (m, 1H), 1.78 (q, 2H,  $J = 12.6$  Hz), 1.66 - 1.59 (m, 2H), 1.49-1.41 (m, 2H), 1.26 (t, 3H,  $J = 7.1$  Hz), 1.18-1.07 (m, 2H), 0.87 (s, 3H) ppm;  $^{13}\text{C NMR}$  (126 MHz,  $\text{CDCl}_3$ )  $\delta$  167.5, 160.7, 140.1, 116.6, 113.7, 59.8, 56.0, 45.6, 42.5, 40.4, 37.9, 34.9, 29.9, 28.3, 24.8, 24.1, 23.0, 14.4 ppm; IR (thin film)  $\nu_{\text{max}}$  3075, 2928, 2862, 1720, 1639  $\text{cm}^{-1}$ ; HRMS (ESI+) calculated for  $\text{C}_{18}\text{H}_{29}\text{O}_2$   $[\text{M}+\text{H}]^+$  277.2168 found 277.2172.

### minor diastereomer of enoate ester 30

$^1\text{H NMR}$  (500 MHz,  $\text{CDCl}_3$ )  $\delta$  5.83 (ddt, 1H,  $J = 17.0, 10.2, 6.5$  Hz), 5.69 (s, 1H), 5.01 (d, 1H,  $J = 17.0$  Hz), 4.92 (d, 1H,  $J = 10.2$  Hz), 4.14 (q, 2H,  $J = 7.1$  Hz), 3.92 (dt, 1H,  $J = 13.7, 2.8$  Hz), 2.18-2.08 (m, 1H), 2.08-1.94 (m, 2H), 1.93 -1.76 (m, 4H), 1.71-1.61 (m, 2H), 1.55 - 1.50 (m, 1H), 1.47-1.33 (m, 3H), 1.28 (t, 3H,  $J = 7.1$  Hz), 1.26-1.16 (m, 2H), 1.06 (s, 3H) ppm;  $^{13}\text{C NMR}$  (126 MHz,  $\text{CDCl}_3$ )  $\delta$  167.2, 162.2, 139.6,

114.0, 111.9, 59.7, 59.6, 44.2, 41.2, 43.1, 39.0, 33.5, 30.4, 29.4, 27.8, 27.2, 20.9, 14.4 ppm; IR (thin film)  $\nu_{\max}$  3075, 2929, 2863, 1717, 1641  $\text{cm}^{-1}$ ; HRMS (ESI+) calculated for  $\text{C}_{18}\text{H}_{29}\text{O}_2$   $[\text{M}+\text{H}]^+$  277.2168 found 277.2169

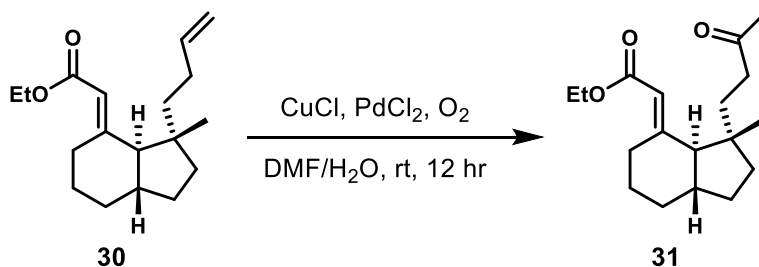

To a 50 mL round bottom flask equipped with a stir bar was added **enoate ester 30** (209.4 mg, 0.752 mmol), a mixture of DMF/ $\text{H}_2\text{O}$  (10:1, 7.52 mL), CuCl (112 mg, 1.13 mmol), and PdCl<sub>2</sub> (33.3 mg, 0.188 mmol). The reaction mixture was sparged with  $\text{O}_{2(\text{g})}$  while stirring at room temperature for 30 minutes, then allowed to stir at room temperature under an atmosphere of  $\text{O}_{2(\text{g})}$  for 12 hours. Upon consumption of starting material as indicated by TLC analysis, the reaction mixture was filtered through Celite, rinsing with Et<sub>2</sub>O (30 mL). The filtrate was washed with 1:1 brine:water (3 x 10 mL), brine (1 x 10 mL), dried over MgSO<sub>4</sub>, filtered, and concentrated *in vacuo*. The crude product was purified by column chromatography (SiO<sub>2</sub>, 20% Et<sub>2</sub>O in hexanes) affording **keto ester 31** (202 mg, 92%) as a colorless oil (inconsequential 2:1 mixture of diastereomers).

#### major diastereomer of keto ester 31

<sup>1</sup>H NMR (500 MHz, CDCl<sub>3</sub>)  $\delta$  5.78 (t, 1H,  $J = 1.8$  Hz), 4.09 (tq, 2H,  $J = 10.8, 3.7$  Hz, this is more likely 2 dq's, one for each methylene hydrogen of the ethyl ester which is split by 10.8 Hz), 2.78 (dt, 1H,  $J = 12.5, 1.3$  Hz), 2.61 (ddd, 1H,  $J = 16.3, 8.6, 7.6$  Hz), 2.45-2.31 (m, 2H), 2.15 (s, 3H), 2.14-2.07 (m, 1H), 1.99 (ddd, 1H,  $J = 12.7, 6.5, 1.5$  Hz), 1.94-1.85 (m, 1H), 1.80 (tdd, 1H,  $J = 10.8, 3.0, 1.7$  Hz), 1.72-1.56 (m, 4H), 1.43 (dt, 1H,  $J = 13.3, 8.7$  Hz), 1.26 (t, 3H,  $J = 7.1$  Hz), 1.23-1.03 (m, 2H), 0.87 (s, 3H) ppm; <sup>13</sup>C NMR (126 MHz, CDCl<sub>3</sub>)  $\delta$  210.1, 167.5, 160.8, 116.7, 59.9, 54.6, 44.8, 40.7, 40.0, 37.8, 36.3, 34.8, 30.0, 28.8, 24.7, 24.2, 23.9, 14.3 ppm; IR (thin film)  $\nu_{\max}$  2944, 2864, 1716, 1638  $\text{cm}^{-1}$ ; HRMS (ESI+) calculated for  $\text{C}_{18}\text{H}_{29}\text{O}_3$   $[\text{M}+\text{H}]^+$  293.2117 found 293.2130.

Note: The <sup>1</sup>H NMR spectra of this compound is contaminated with ~2% of an aldehyde tentatively assigned from anti-Markovnikov oxidation.

#### minor diastereomer of keto ester 31

<sup>1</sup>H NMR (500 MHz, CDCl<sub>3</sub>)  $\delta$  5.67 (t, 1H,  $J = 1.5$  Hz), 4.131 (q, 1H,  $J = 7.1$  Hz), 4.128 (q, 1H,  $J = 7.1$  Hz), 3.93 (td, 1H,  $J = 14.0, 3.0$  Hz), 2.52 (ddd, 1H,  $J = 16.7, 11.8, 4.9$  Hz), 2.38 (dddd, 1H,  $J = 16.7, 11.8, 4.9$  Hz), 2.16 (s, 3H), 2.04-1.94 (m, 2H), 1.91-1.77 (m, 2H), 1.69-1.53 (m, 3H), 1.51-1.32 (m, 2H), 1.27 (t, 3H,  $J = 7.1$  Hz), 1.28-1.67 (m, 2H), 1.05 (s, 3H) ppm; <sup>13</sup>C NMR (126 MHz, CDCl<sub>3</sub>)  $\delta$  209.4, 167.2, 161.8, 112.1, 59.8, 59.7, 44.3, 42.6, 39.8, 39.0, 34.6, 33.5, 30.4, 30.1, 27.8, 27.2, 20.9, 14.5 ppm; IR (thin film)  $\nu_{\max}$  2931, 2864, 2359, 2339, 1714, 1643  $\text{cm}^{-1}$ ; HRMS (ESI+) calculated for  $\text{C}_{18}\text{H}_{28}\text{O}_3\text{Na}$   $[\text{M}+\text{Na}]^+$  315.1936 found 315.1929.

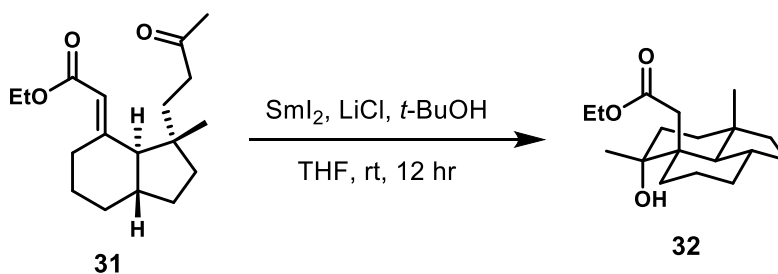

To a 2-dram vial equipped with a stir bar in a glove box was added anhydrous LiCl (40.0 mg, 0.944 mmol). The vessel was removed from the glovebox and placed under an atmosphere of argon. SmI<sub>2</sub><sup>6</sup> (0.1 M in THF, 1.89 mL, 0.189 mmol) was added to the reaction vessel. The mixture was allowed to stir vigorously for 30 minutes at room temperature. A color change to dark green was observed.

The reaction mixture was then cooled to  $-78\text{ }^{\circ}\text{C}$  *via*  $\text{Me}_2\text{CO}/\text{CO}_2(\text{s})$  bath. A solution of **keto ester 31** (18.4 mg, 0.0629 mmol) and *t*-BuOH (6.6  $\mu\text{L}$ , 0.0692 mmol) in degassed THF (1.79 mL) was added dropwise *via* syringe to the reaction mixture at  $-78\text{ }^{\circ}\text{C}$ , rinsing with degassed THF (0.2 mL). The reaction vessel was allowed to warm to room temperature, then allowed to stir at room temperature for 12 hours. Upon consumption of starting material as indicated by TLC analysis, the reaction was quenched at room temperature by the addition of 1:1 saturated  $\text{NaHCO}_3(\text{aq})$ :brine (3 mL). The resultant slurry was allowed to stir vigorously at room temperature for 20 minutes, then extracted with  $\text{Et}_2\text{O}$  (3 x 6 mL). The organic extracts were dried over  $\text{MgSO}_4$ , filtered, and concentrated *in vacuo*. The crude product was purified by column chromatography ( $\text{SiO}_2$ , 30%  $\text{Et}_2\text{O}$  in hexanes) affording **hydroxyester 32** (15.6 mg, 84%) as a colorless oil.

#### hydroxyester 32

$^1\text{H NMR}$  (500 MHz,  $\text{C}_6\text{D}_6$ )  $\delta$  3.96 (qd, 1H,  $J = 10.8, 7.1$  Hz), 3.95 (qd, 1H,  $J = 10.8, 7.1$  Hz), 2.45 (d, 1H,  $J = 15.5$  Hz), 2.29 (dt, 1H,  $J = 12.7, 3.0$  Hz), 2.26 (d, 1H,  $J = 15.5$  Hz), 1.91 (dq, 1H,  $J = 12.1, 3.4$  Hz), 1.82-1.45 (m, 7H), 1.40 (d, 1H,  $J = 13.0$  Hz), 1.37 (dt, 1H,  $J = 12.1, 3.4$  Hz), 1.31-1.19 (m, 3H), 1.23 (s, 3H), 1.18-1.10 (m, 1H), 0.99 (t, 3H,  $J = 7.1$  Hz), 0.97-0.91 (m, 1H), 0.67 (s, 3H);  $^{13}\text{C NMR}$  (126 MHz,  $\text{C}_6\text{D}_6$ )  $\delta$  172.3, 73.5, 59.8, 54.5, 45.2, 41.9, 40.0, 35.5, 35.2, 34.6, 34.4, 34.1, 28.4, 27.6, 26.0, 23.6, 20.8, 14.2 ppm; IR (thin film) 3527, 2977, 2935, 2864, 1735, 1714  $\text{cm}^{-1}$ ; HRMS (ESI+) calculated for  $\text{C}_{18}\text{H}_{30}\text{O}_3\text{Na}$   $[\text{M}+\text{Na}]^+$  317.2093 found 317.2094.

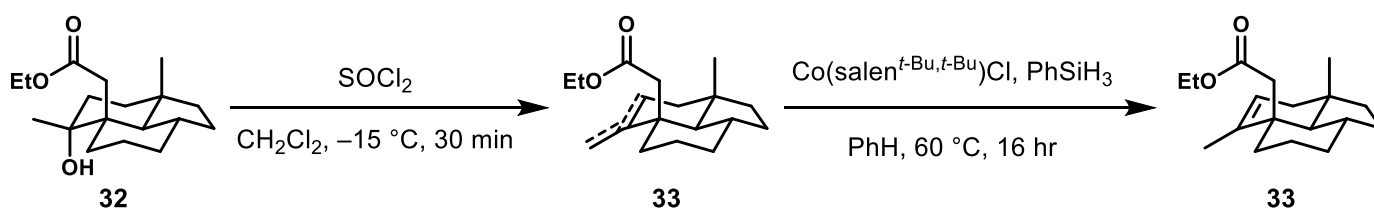

To a 2-dram vial equipped with a stir bar was added **hydroxyester 32** (26.1 mg, 0.0893 mmol), pyridine (72.0  $\mu\text{L}$ , 0.893 mmol), and  $\text{CH}_2\text{Cl}_2$  (0.72 mL). The mixture was cooled to  $-15\text{ }^{\circ}\text{C}$  *via*  $\text{MeOH}/\text{H}_2\text{O}/\text{CO}_2(\text{s})$  bath. A solution of  $\text{SOCl}_2$  (7.8  $\mu\text{L}$ , 0.107 mmol) in  $\text{CH}_2\text{Cl}_2$  (0.1 mL) was added dropwise *via* syringe to the reaction vessel at  $-15\text{ }^{\circ}\text{C}$ . The reaction mixture was allowed to stir at  $-15\text{ }^{\circ}\text{C}$  for 30 minutes. Upon consumption of starting material as indicated by TLC analysis, the reaction was quenched at  $-15\text{ }^{\circ}\text{C}$  by the addition of saturated  $\text{NaHCO}_3(\text{aq})$  (1 mL). The layers were partitioned, and the aqueous layer was extracted with  $\text{CH}_2\text{Cl}_2$  (3 x 2 mL). The organic extracts were dried over  $\text{MgSO}_4$ , filtered, and concentrated *in vacuo*, affording crude **alkene 33** (2.8:1 mixture of *endo:exo*). The crude mixture was carried forward without further purification.

To a 2-dram vial equipped with stir bar was added the crude mixture of **alkenes 33**,  $\text{Co}(\text{salen}^{\text{t-Bu,t-Bu}})\text{Cl}$  (1.47 mg, 2.31  $\mu\text{mol}$ ), degassed benzene (0.67 mL), and a solution of  $\text{PhSiH}_3$  (0.57  $\mu\text{L}$ , 4.63  $\mu\text{mol}$ ) in degassed benzene (0.1 mL). The vial was sealed under a stream of argon, then heated to  $60\text{ }^{\circ}\text{C}$  *via* oil bath. The reaction mixture was allowed to stir at  $60\text{ }^{\circ}\text{C}$  for 16 hours, then allowed to cool to room temperature. The reaction mixture was concentrated *in vacuo*. The resultant residue was purified by column chromatography ( $\text{SiO}_2$ , 2%  $\text{Et}_2\text{O}$  in hexanes) affording **alkene 33** (17.7 mg, 71%) as a colorless oil.

Note: The  $\alpha$ -ester methylene and ethyl ester methylene protons are distinct owing to slow equilibration of rotamers.

#### alkene 33

$^1\text{H NMR}$  (500 MHz,  $\text{CDCl}_3$ )  $\delta$  5.28-5.25 (m, 1H), 4.13 (dq, 1H,  $J = 10.8, 7.1$  Hz), 4.07 (dq, 1H,  $J = 10.8, 7.1$  Hz), 4.03 (dt, 1H,  $J = 10.8, 7.1$  Hz, rotamer), 3.96 (dt, 1H,  $J = 10.8, 7.1$  Hz, rotamer), 2.71 (d, 1H,  $J = 13.4$  Hz, rotamer), 2.70 (d, 1H,  $J = 13.4$  Hz), 2.44 (dd, 1H,  $J = 13.4, 0.7$  Hz, rotamer), 2.43 (dd, 1H,  $J = 13.4, 0.7$  Hz), 2.26 (dt, 1H,  $J = 13.0, 3.2$  Hz), 2.08 (ddq, 1H,  $J = 17.5, 4.8, 1.5$  Hz), 2.05-1.96 (m, 2H), 1.91 (dtd, 1H,  $J = 13.0, 9.3, 7.2$  Hz), 1.87-1.77 (m, 1H), 1.70-1.60 (m, 3H), 1.53 (ddd, 1H,  $J = 12.5, 9.2, 3.3$  Hz), 1.37 (td, 1H,  $J = 12.0, 7.3$  Hz), 1.25 (t, 3H,  $J = 7.1$  Hz), 1.24-1.17 (m, 1H), 1.18 (d, 1H,  $J = 12.8$  Hz), 1.05-0.91 (m, 2H), 0.89 (s, 3H) ppm;  $^{13}\text{C NMR}$  (126 MHz,  $\text{CDCl}_3$ ) 173.7, 141.1, 122.9, 60.9, 60.2, 42.6, 42.2, 41.0, 38.0, 37.4, 34.7, 33.8, 28.8, 23.3, 23.0, 18.7, 14.3 ppm; IR (thin film)  $\nu_{\text{max}}$  2936, 2865, 2831, 1731  $\text{cm}^{-1}$ ; HRMS (ESI+) calculated for  $\text{C}_{18}\text{H}_{28}\text{O}_2\text{Na}$   $[\text{M}+\text{Na}]^+$  299.1987 found 299.1994.

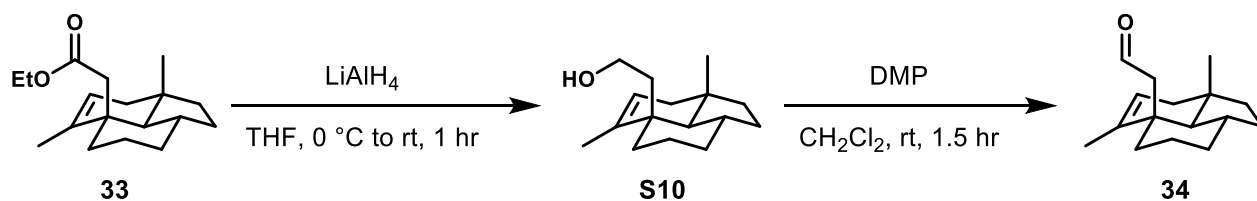

To a 2-dram vial equipped with a stir bar was added THF (1 mL) and LiAlH<sub>4</sub> (15.8 mg, 0.417 mmol). The slurry was cooled to 0 °C *via* ice bath. A solution of **alkene 33** (38.4 mg, 0.139 mmol) in THF (0.2 mL) was added dropwise *via* syringe at 0 °C to the reaction vessel, rinsing with THF (0.2 mL). The reaction mixture was allowed to stir at 0 °C for 30 minutes, warmed to room temperature, and allowed to stir at room temperature for 30 minutes. Upon consumption of starting material as indicated by TLC analysis, the reaction mixture was cooled to 0 °C. H<sub>2</sub>O (16 μL), of 15 w/v% NaOH<sub>(aq)</sub> (16 μL) and H<sub>2</sub>O (48 μL) were added to the reaction mixture at 0 °C. The resultant slurry was allowed to warm to room temperature then allowed to stir at room temperature for 20 minutes. MgSO<sub>4</sub> was added to the mixture, and the resultant slurry was filtered through MgSO<sub>4</sub>, rinsing with Et<sub>2</sub>O. The filtrate was concentrated *in vacuo*, affording crude **alcohol S10**, which was carried forward without further purification.

To a 2-dram vial equipped with stir bar was added crude **alcohol S10** (0.139 mmol), CH<sub>2</sub>Cl<sub>2</sub> (1.4 mL) which had been previously shaken with distilled H<sub>2</sub>O, and Dess-Martin periodinane (83.9 mg, 0.198 mmol). The reaction mixture was allowed to stir at room temperature for 1.5 hours. Upon consumption of starting material as indicated by TLC analysis, the reaction mixture was diluted with pentane (1.4 mL), dried over MgSO<sub>4</sub>, filtered, and concentrated *in vacuo*. The crude product was purified by column chromatography (SiO<sub>2</sub>, 3% Et<sub>2</sub>O in hexanes) affording **aldehyde 34** (27.4 mg, 85%) as a colorless oil.

#### aldehyde 34

<sup>1</sup>H NMR (500 MHz, CDCl<sub>3</sub>) δ 9.95 (t, 1H, *J* = 3.3 Hz), 5.32 (s, 1H), 2.67 (dd, 1H, *J* = 15.2, 3.2 Hz), 2.50 (dd, 1H, *J* = 15.2, 3.2 Hz), 2.12-1.97 (m, 4H), 1.97-1.79 (m, 2H), 1.70 (s, 3H), 1.69-1.62 (m, 1H), 1.58-1.46 (m, 2H), 1.39 (td, 1H, *J* = 12.2, 7.1 Hz), 1.27-1.18 (m, 1H), 1.16 (d, 12.7 Hz), 1.09 (td, 1H, *J* = 13.2, 4.0 Hz), 1.01 (td, 1H, *J* = 12.2, 4.0 Hz), 0.83 (s, 3H) ppm; <sup>13</sup>C NMR (126 MHz, CDCl<sub>3</sub>) δ 204.7, 139.7, 123.8, 60.7, 46.9, 42.5, 41.8, 40.9, 38.1, 36.0, 34.4, 33.8, 28.8, 22.9, 22.6, 19.0 ppm; IR (thin film) ν<sub>max</sub> 3007, 2930, 2865, 2831, 2736, 1716 cm<sup>-1</sup>; HRMS (ESI+) calculated for C<sub>16</sub>H<sub>24</sub>ONa [M+Na]<sup>+</sup> 255.1725 found 255.1728.

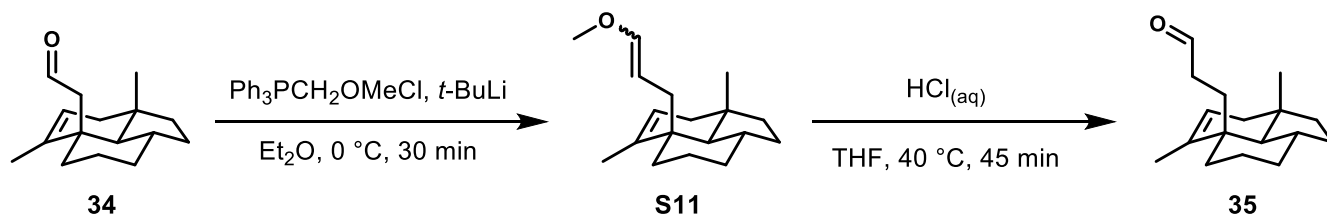

To a 1-dram vial equipped with a stir bar was added Ph<sub>3</sub>PCH<sub>2</sub>OMeCl (20.1 mg, 58.7 μmol) and Et<sub>2</sub>O (0.17 mL). The mixture was cooled to 0 °C *via* ice bath. *t*-BuLi (31.4 μL, 53.4 μmol, 1.7 M in pentane) was added dropwise *via* syringe at 0 °C to the reaction mixture. A color change to red was observed. The mixture was allowed to warm to room temperature and allowed to stir at room temperature for 15 minutes. The reaction mixture was then cooled to 0 °C. **Aldehyde 34** (6.2 mg, 26.7 μmol) was added dropwise *via* syringe at 0 °C to the reaction vessel. The reaction mixture was allowed to stir at 0 °C for 30 minutes. Upon consumption of starting material as indicated by TLC analysis, the reaction was quenched at 0 °C by the addition of saturated NH<sub>4</sub>Cl<sub>(aq)</sub> (1 mL) then allowed to warm to room temperature. The resultant slurry was extracted with Et<sub>2</sub>O (3 x 2 mL). The organic extracts were dried over MgSO<sub>4</sub>, filtered, and concentrated *in vacuo*, affording crude **methyl alkenyl ether S11** (1:1 E:Z) as a yellow oil. The crude product was carried forward without further purification.

To a 1-dram vial equipped with a stir bar was added crude **methyl alkenyl ether S11**, THF (0.2 mL), and 10% (w/v%) HCl<sub>(aq)</sub> (0.2 mL). The mixture was heated to 40 °C *via* oil bath and allowed to stir at 40 °C for 45 minutes. Upon consumption of starting material as indicated by TLC analysis, the reaction vessel was cooled to 0 °C *via* ice bath. The reaction was quenched at 0 °C by the addition of saturated NaHCO<sub>3(aq)</sub> (1 mL), then allowed to warm to room temperature. The resultant slurry was extracted with Et<sub>2</sub>O (3 x 2 mL). The

organic extracts were dried over  $\text{MgSO}_4$ , filtered, and concentrated *in vacuo*. The crude product was purified by column chromatography ( $\text{SiO}_2$ , 2%  $\text{Et}_2\text{O}$  in hexanes) affording **aldehyde 35** (5.2 mg, 72%) as a colorless oil.

#### aldehyde 35

$^1\text{H NMR}$  (500 MHz,  $\text{CDCl}_3$ )  $\delta$  9.76 (t, 1H,  $J = 1.5$  Hz), 5.24 (s, 1H), 2.60 (dddd, 1H,  $J = 17.0, 12.2, 5.0, 1.7$  Hz), 2.52 (dddd, 1H,  $J = 17.0, 12.2, 5.0, 1.7$  Hz), 2.10-1.95 (m, 4H), 1.95-1.83 (m, 3H), 1.79 (ddd, 1H,  $J = 16.6, 11.8, 5.0$  Hz), 1.70 (s, 3H, coupling constants too small to determine), 1.63 (dq, 1H,  $J = 14.1, 3.5$  Hz), 1.56-1.50 (m, 1H), 1.41-1.29 (m, 2H), 1.26-1.13 (m, 1H), 1.17 (d, 1H,  $J = 12.5$  Hz), 1.03-0.91 (m, 2H), 0.90 (s, 3H) ppm;  $^{13}\text{C NMR}$  (126 MHz,  $\text{CDCl}_3$ )  $\delta$  203.0, 141.4, 123.1, 60.9, 42.7, 42.2, 41.2, 39.6, 38.2, 34.48, 34.46, 33.9, 28.8, 24.3, 23.6, 23.0, 19.9 ppm; IR (thin film) 2926, 2864, 2804, 2713, 1758  $\text{cm}^{-1}$ ; HRMS (ESI+) calculated for  $\text{C}_{17}\text{H}_{26}\text{ONa}$   $[\text{M}+\text{Na}]^+$  269.1881 found 269.1888.

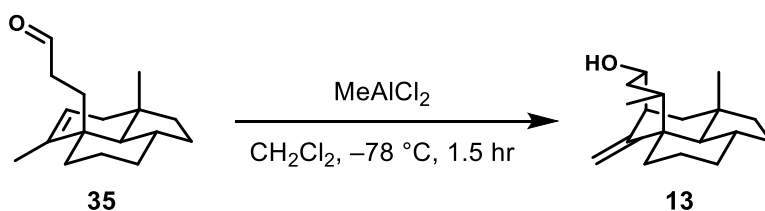

To a 25 mL round bottom flask equipped with a stir bar was added **aldehyde 35** (6.4 mg, 0.026 mmol) and  $\text{CH}_2\text{Cl}_2$  (5.5 mL). The vessel was cooled to  $-78^\circ\text{C}$  *via*  $\text{Me}_2\text{CO}/\text{CO}_2(\text{s})$  bath, and  $\text{MeAlCl}_2$  (1 M in hexane) (40  $\mu\text{L}$ , 0.040 mmol) was added dropwise. The reaction mixture was allowed to stir at  $-78^\circ\text{C}$  for 1.5 hours. Upon consumption of starting material as indicated by TLC analysis, the reaction was quenched at  $78^\circ\text{C}$  by the dropwise addition of citric acid (2.5 mL), then allowed to warm to room temperature. The phases were partitioned, and the aqueous layer was extracted with DCM (2 x 5 mL). The organic extracts were dried over  $\text{Mg}_2\text{SO}_4$ , filtered, and concentrated *in vacuo*. The crude material was purified by column chromatography ( $\text{SiO}_2$ , 7.5% to 15% to 30%  $\text{Et}_2\text{O}$  in hexanes, stepped gradient) affording an inseparable 3:1 mixture of hydrocarbon alcohols (3.4 mg). The spectral data for the minor component of this mixture are consistent with those expected for the desired Prins cyclization product **13**.

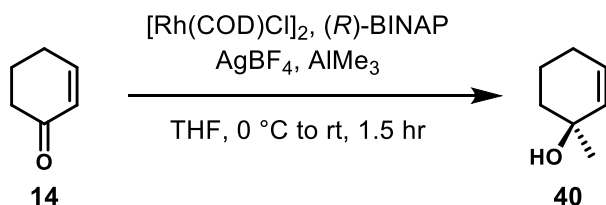

To a 3-necked 2 L round bottom flask equipped with a stir bar and internal thermometer was added  $[\text{Rh}(\text{COD})\text{Cl}]_2$  (1.63 g, 3.30 mmol),  $(R)\text{-BINAP}$  (4.93 g, 7.92 mmol), and THF (700 mL). The mixture was allowed to stir at room temperature for 1 hour, then a solution of  $\text{AgBF}_4$  (2.18 g, 11.2 mmol) in THF (10 mL) was added, rinsing with THF (2 x 1 mL). A color change from red to orange was observed. Neat **cyclohexenone 14** (48.1 g, 500 mmol) was then added to the reaction vessel. The mixture was cooled to  $5^\circ\text{C}$  (internal temperature) *via* ice bath, and neat  $\text{AlMe}_3$  (57.5 mL, 600 mmol) was added at a rate sufficient to maintain the internal temperature below  $10^\circ\text{C}$  (*ca.* 45 minutes). A color change from orange to brown was observed. Following completion of the addition, the mixture was allowed to stir at  $0^\circ\text{C}$  for 30 minutes, then allowed to warm to room temperature. Upon consumption of starting material as indicated by TLC analysis (*ca.* 1 hour), the reaction mixture was decanted into a 4 L beaker equipped with stir bar containing pentane (1 L) (pre-cooled to  $0^\circ\text{C}$  *via* ice bath). After vigorous stirring at  $0^\circ\text{C}$  for 10 minutes, the mixture was allowed to warm to room temperature, and activated charcoal (120 g) followed by  $\text{Na}_2\text{SO}_4(\text{s})$  (16 g) were added. The suspension was allowed to stir vigorously for 5 minutes, then filtered through a plug of Celite<sup>®</sup>, rinsing with pentane (3 x 200 mL). The filtrate was concentrated *in vacuo* to afford crude **alcohol 40** (46.7 g, 83%) as a colorless liquid. Crude **alcohol 40** was carried forward without further purification. The characterization data obtained are in good agreement with those previously reported.<sup>7</sup>



#### alcohol 40

$^1\text{H NMR}$  (500 MHz,  $\text{CDCl}_3$ )  $\delta$  5.62 (dt,  $J = 10.0, 3.7$  Hz, 1H), 5.52 (appar. d,  $J = 12$  Hz, 1H) 2.19 (bs, 1H), 1.97-1.88 (m, 1H), 1.82 (dddd,  $J = 17.3, 7.8, 5.5, 2.6$  Hz, 1H), 1.69-1.58 (m, 2H), 1.56-1.48 (m, 2H), 1.18 (s, 3H) ppm;  $^{13}\text{C NMR}$  (125 MHz,  $\text{CDCl}_3$ )  $\delta$  133.89, 128.47, 67.76, 37.75, 29.26, 24.95, 19.43 ppm;  $[\alpha]_{\text{D}}^{22.4} = -69.8$  (c 1.00,  $\text{CHCl}_3$ ); **FTIR** (film)  $\nu_{\text{max}}$  3341 (br), 3019, 2933, 2872  $\text{cm}^{-1}$ ; **SFC** analysis (Chiracel AD, 0.1% *i*-PrOH, 3 mL/min, 210 nm) indicated >99% ee:  $t_{\text{R}}$  (desired enantiomer) = 4.0 minutes,  $t_{\text{R}}$  (undesired enantiomer) = 4.6 minutes.

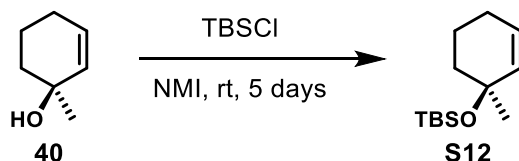

To a 500 mL round bottom flask equipped with a stir bar was added TBSCl (62.7 g, 416 mmol). The vessel was evacuated and backfilled with argon three times. *N*-Methylimidazole (60 mL, 820 mmol) was added, followed by neat crude **alcohol 40** (46.7 g, 416 mmol), rinsing with additional *N*-methylimidazole (3 x 5 mL). The reaction mixture was allowed to stir vigorously at room temperature for 5 days. Upon consumption of starting material as indicated by TLC analysis, the reaction mixture was transferred to a separatory funnel and the phases were partitioned. The organic phase was washed with water (4 x 25 mL), dried over  $\text{MgSO}_4$ , filtered, and concentrated *in vacuo* to afford crude **silyl ether S12** (78.3 g, 83%) as a colorless liquid. The crude product was carried forward without further purification.

#### silyl ether S12

$^1\text{H NMR}$  (600 MHz,  $\text{CDCl}_3$ )  $\delta$  5.66 (dt,  $J = 10.0, 3.6$  Hz, 1H), 5.61 (appar. d,  $J = 10.1$  Hz, 1H), 2.04-1.96 (m, 1H), 1.90 (dddd,  $J = 18.7, 8.2, 5.3, 2.8$  Hz, 1H), 1.81-1.72 (m, 2H), 1.60-1.48 (m, 2H), 1.25 (s, 3H), 0.85 (s, 9H), 0.07 (s, 3H), 0.05 (s, 3H) ppm;  $^{13}\text{C NMR}$  (125 MHz,  $\text{CDCl}_3$ )  $\delta$  134.8, 127.9, 70.4, 39.0, 30.9, 26.0, 25.3, 19.7, -1.9, -2.1 ppm;  $[\alpha]_{\text{D}}^{22.4} = -84.4$  (c 1.00,  $\text{CHCl}_3$ ); **FTIR** (film)  $\nu_{\text{max}}$  3021, 2930, 2857  $\text{cm}^{-1}$ ; **HRMS** (CI) calculated for  $\text{C}_{13}\text{H}_{26}\text{OSi}$   $[\text{M}-\text{H}_2+\text{H}]^+$  225.1675 found 225.1664.

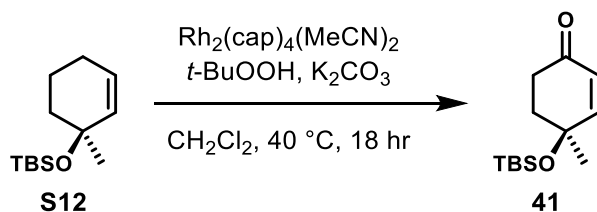

To a 1 L round bottom flask equipped with a stir bar was added  $\text{CH}_2\text{Cl}_2$  (280 mL) and **silyl ether S12** (17.2 g, 75.8 mmol). The mixture was stirred until dissolved, followed by the addition of ignited  $\text{K}_2\text{CO}_3$  (5.24 g, 37.9 mmol) and freshly prepared  $\text{Rh}_2(\text{cap})_4(\text{MeCN})_2^8$  (558 mg, 0.758 mmol). The reaction mixture was heated to 40  $^\circ\text{C}$  *via* oil bath, and TBHP (69 mL, 5.5 M in nonane) was added over 30 seconds. Gas evolution was observed. After 1.5 hours, the reaction mixture was charged with additional  $\text{Rh}_2(\text{cap})_4$  (279 mg, 0.379 mmol) and TBHP (69 mL, 5.5 M in nonane) over 30 seconds. At 3 hours, the addition of  $\text{Rh}_2(\text{cap})_4$  (279 mg, 0.379 mmol) and TBHP (69 mL, 5.5 M in nonane) was repeated. Upon consumption of starting material as indicated by TLC analysis (*ca.* 18 hours), the reaction mixture was allowed to cool to room temperature and concentrated *in vacuo* leaving a crude slurry in nonane, which was then partitioned between  $\text{Et}_2\text{O}$  (400 mL) and water (200 mL). The organic extracts were washed with  $\text{H}_2\text{O}$  (2 x 200 mL), and brine (100 mL), dried over  $\text{Na}_2\text{SO}_4$ , filtered, and concentrated *in vacuo* yielding a solution of crude product in nonane. The crude solution was then purified by column chromatography ( $\text{SiO}_2$ , 0% to 6%  $\text{Et}_2\text{O}$  in pentane, stepped gradient) to afford **enone 41** (13.38 g, 76%) as a colorless oil.

#### enone 41

$^1\text{H NMR}$  (600 MHz,  $\text{CDCl}_3$ )  $\delta$  6.74 (d,  $J = 10.1$  Hz, 1H), 5.83 (d,  $J = 10.1$  Hz, 1H), 2.63 (ddd,  $J = 17.1, 7.7, 4.9$  Hz, 1H), 2.37 (ddd,  $J = 17.1, 9.1, 4.9$  Hz, 1H), 2.16 (ddd,  $J = 13.4, 9.1, 4.9$  Hz, 1H), 2.03 (ddd,  $J = 13.4, 7.7, 4.9$  Hz, 1H), 1.43 (s, 3H), 0.86 (s, 9H), 0.11 (s, 3H), 0.09 (s,

3H) ppm;  $^{13}\text{C}$  NMR (150 MHz,  $\text{CDCl}_3$ )  $\delta$  199.5, 155.6, 127.5, 70.6, 38.3, 35.1, 28.4, 25.8, 18.1, -1.9, -2.0 ppm;  $[\alpha]_{\text{D}}^{21.6} = -82.8$  (c 2.28,  $\text{CH}_2\text{Cl}_2$ ); FTIR (film)  $\nu_{\text{max}}$  2955, 2929, 2857, 1686  $\text{cm}^{-1}$ ; HRMS (CI) calculated for  $\text{C}_{13}\text{H}_{24}\text{O}_2\text{Si}$   $[\text{M}+\text{H}]^+$  241.1624 found 241.1615.

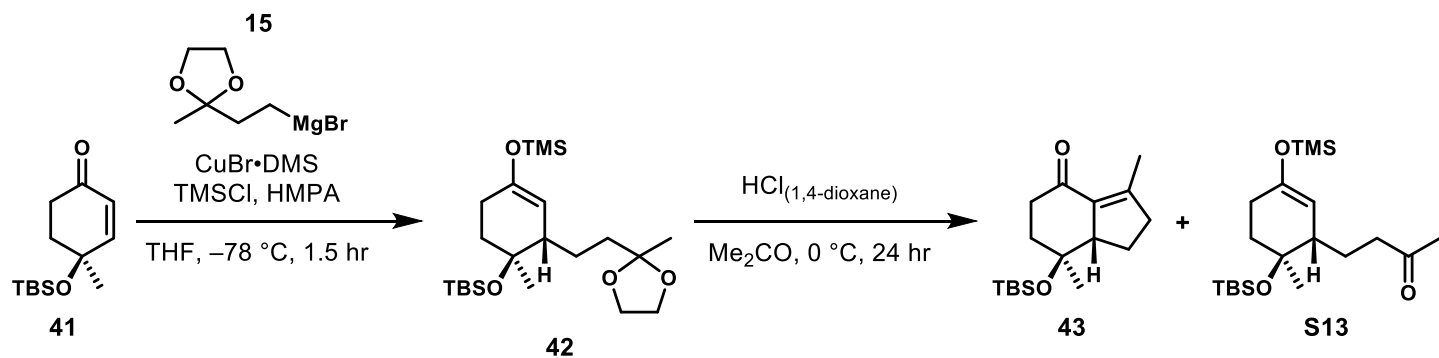

To a 3-necked 500 mL round bottom flask equipped with a stir bar and internal thermometer was added magnesium powder (20-230 mesh, 6.95 g, 286 mmol). The flask was then flame dried under high vacuum and allowed to cool to room temperature under an atmosphere of argon. THF (150 mL) and dibromoethane (220  $\mu\text{L}$ ) were added. The resultant slurry was sonicated for one minute, then stirred vigorously until a gray precipitate was observed (ca. 30 min). The reaction mixture was cooled to 10  $^{\circ}\text{C}$  (internal temperature) *via* ice bath, and a solution of **bromoketal S4** (22.3 g, 114 mmol) in THF (80 mL) was added dropwise at a rate sufficient to maintain an internal temperature of 10–20  $^{\circ}\text{C}$ . The flask containing the bromide solution was then rinsed with THF (2 x 35 mL) and transferred to the reaction mixture, ensuring quantitative transfer. The reaction mixture was then stirred for 30 minutes at an internal temperature of 15  $^{\circ}\text{C}$ . Stirring was halted, and the precipitate was allowed to settle (ca. 15 min). The supernatant containing **Grignard reagent 15** was transferred *via* cannula into a flame dried 3-necked 500 mL round bottom flask equipped with stir bar, rinsing with THF (2 x 35 mL). The solution was then cooled to -60  $^{\circ}\text{C}$  (internal temperature) *via*  $\text{Me}_2\text{CO}/\text{CO}_2(\text{s})$  bath and freshly prepared  $\text{CuBr}\cdot\text{DMS}^9$  (11.8 g, 57.2 mmol) was added in one portion. The reaction mixture was warmed to -40  $^{\circ}\text{C}$  (internal temperature) *via*  $\text{MeCN}/\text{CO}_2(\text{s})$  bath and allowed to stir for 30 minutes, during which time a color change from gray to brown was observed. The reaction mixture was then cooled to -78  $^{\circ}\text{C}$  (internal temperature) *via*  $\text{Me}_2\text{CO}/\text{CO}_2(\text{s})$  bath. HMPA (19.9 mL, 114 mol) and TMSCl (14.5 mL, 114 mmol) were added dropwise to the reaction mixture. A solution of **enone 41** (13.8 g, 57.2 mmol) in THF (40 mL) was then added dropwise *via* cannula, rinsing with THF (2 x 25 mL). The resulting mixture was stirred at -78  $^{\circ}\text{C}$  (internal temperature) for an additional 1.5 hours, then quenched with 4:1  $\text{NH}_4\text{Cl}_{(\text{aq})}$ :1 M NaOH (350 mL) at -78  $^{\circ}\text{C}$  and allowed to warm to room temperature. The mixture was diluted with water until precipitated salts were dissolved, and extracted with  $\text{Et}_2\text{O}$  (3 x 600 mL). The organic extracts were washed with water (2 x 300 mL), 4:1  $\text{NH}_4\text{Cl}_{(\text{aq})}$ :1 M NaOH (300 mL), and brine (150 mL), dried over  $\text{MgSO}_4$ , filtered, and concentrated *in vacuo*. The crude **enoxysilane 42** was carried forward without further purification.

To a 1 L round bottom flask equipped with a stir bar was added crude **enoxysilane 42** and  $\text{Me}_2\text{CO}$  (380 mL). The mixture was stirred at room temperature until dissolved, then cooled to 0  $^{\circ}\text{C}$  *via* ice bath. Hydrochloric acid in 1,4-dioxane (38 mL, 4 M) was added and the resulting mixture was allowed to sit in a freezer (ca. -20  $^{\circ}\text{C}$ ) for 24 hours. The reaction mixture was quenched with saturated  $\text{NaHCO}_3(\text{aq})$  (300 mL) at 0  $^{\circ}\text{C}$ , allowed to warm to room temperature, and extracted with hexanes (3 x 600 mL). The organic extracts were dried over  $\text{MgSO}_4$ , filtered, and concentrated *in vacuo*. The resultant crude product was purified by column chromatography ( $\text{SiO}_2$ , 3%  $\text{Et}_2\text{O}$  in hexanes). Unreacted **diketone S13** (2.38 g) was recovered by eluting with 30%  $\text{EtOAc}$  in hexanes and resubjected to the reaction conditions (76.3 mL  $\text{Me}_2\text{CO}$ , 7.63 mL 4 M HCl in 1,4-dioxane). **Hydrindenone 43** (12.1 g, 72% overall) was obtained as a yellow oil.

#### hydrindenone 43

$^1\text{H}$  NMR (600 MHz,  $\text{CDCl}_3$ )  $\delta$  3.08 (t,  $J = 8.5$  Hz, 1H), 2.48-2.37 (m, 2H), 2.34-2.25 (m, 2H), 2.07 (s, 3H), 2.02-1.88 (m, 3 H), 1.7 (dq,  $J = 12.9, 9.5$  Hz, 1H), 1.16 (s, 3H), 0.86 (s, 9H), 0.09 (s, 3H), 0.08 (s, 3H) ppm;  $^{13}\text{C}$  NMR (150 MHz,  $\text{CDCl}_3$ )  $\delta$  199.3, 155.8, 133.5, 74.7, 58.1, 39.7, 38.8, 38.7, 25.9, 24.4, 21.7, 18.2, 16.4, -1.80, -1.83 ppm;  $[\alpha]_{\text{D}}^{22.4} = -3.7$  (c 1.22,  $\text{CH}_2\text{Cl}_2$ ); FTIR (film)  $\nu_{\text{max}}$  2955, 2929, 2856, 1681, 1618  $\text{cm}^{-1}$ ; HRMS (CI) calculated for  $\text{C}_{17}\text{H}_{30}\text{O}_2\text{Si}$   $[\text{M}+\text{H}]^+$  295.2093 found 295.2094.

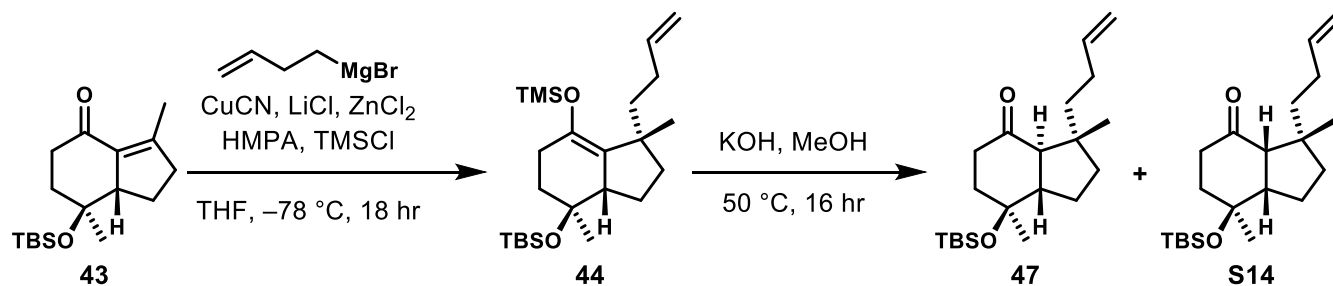

To a 1 L round bottom flask equipped with a stir bar was added magnesium powder (20-230 mesh, 25.5 g, 1.05 mol). The flask was then flame dried under high vacuum and allowed to cool to room temperature under an atmosphere of argon. THF (50 mL) and dibromoethane (150  $\mu\text{L}$ ) were added. The resultant slurry was sonicated for one minute, then stirred vigorously until a gray precipitate was observed (ca. 30 min). Neat 4-bromobutene (35.5 mL, 0.35 mol) was added slowly until an exotherm was observed indicating formation of the desired Grignard reagent. THF (300 mL) was then added, followed by dropwise addition of the remaining 4-bromobutene. The flask was then submerged in a 10–15  $^\circ\text{C}$  water/ice bath to cool the exotherm. Upon completion of the addition, the slurry was stirred for a further 1 hour at room temperature. Stirring was halted, and the precipitate was allowed to settle (ca. 15 min). The resulting solution of 4-butenylmagnesium bromide was titrated, and a concentration of 1.0 M was observed. To a separate 1 L round bottom flask was added previously refused  $\text{ZnCl}_2$  (15.4 g, 113 mmol). The flask was then flame dried under high vacuum until melting of the  $\text{ZnCl}_2$  was observed then allowed to cool to room temperature under an atmosphere of argon. THF (320 mL) was added, and the mixture was sonicated at room temperature until dissolved. The resulting solution was cooled to  $-78\text{ }^\circ\text{C}$  *via*  $\text{Me}_2\text{CO}/\text{CO}_2(\text{s})$  bath, and freshly prepared 4-butenylmagnesium bromide (1.0 M in THF, 221 mL, 221 mmol) was added dropwise *via* cannula. The reaction mixture was allowed to warm to room temperature, then allowed to stir at room temperature for 1 hour. The reaction mixture was then cooled to  $-78\text{ }^\circ\text{C}$  *via*  $\text{Me}_2\text{CO}/\text{CO}_2(\text{s})$  bath.  $\text{CuCN}$  (10.2 g, 114 mmol) and  $\text{LiCl}$  (9.82 g, 232 mmol) were added, and the resulting slurry was allowed to stir at  $-78\text{ }^\circ\text{C}$  for 1 hour.  $\text{HMPA}$  (37.6 mL, 216 mmol) and  $\text{TMSCl}$  (20.1 mL, 158 mmol) were added dropwise, and the reaction mixture was then allowed to stir at  $-78\text{ }^\circ\text{C}$  for 30 minutes. A solution of **enone 43** (15.5 g, 52.7 mmol) in THF (85 mL) was then added dropwise to the reaction mixture. The reaction mixture was allowed to stir at  $-78\text{ }^\circ\text{C}$  for 18 hours. Upon consumption of starting material as indicated by TLC analysis, the reaction mixture was quenched at  $-78\text{ }^\circ\text{C}$  with a 4:1  $\text{NH}_4\text{Cl}_{(\text{aq})}$ :1 M  $\text{NaOH}$  solution (500 mL), allowed to warm to room temperature, and extracted with hexanes (3 x 250 mL). The organic extracts were washed with 4:1  $\text{NH}_4\text{Cl}_{(\text{aq})}$ :1 M  $\text{NaOH}$  (250 mL), water (250 mL), and brine (150 mL), dried over  $\text{MgSO}_4$ , filtered, and concentrated *in vacuo*. Crude **enoxysilane 44** (93:7 *dr* by crude  $^1\text{H-NMR}$  integration) was carried forward without further purification.

To a 1 L round bottom flask containing crude **enoxysilane 44** (23.0 g, 52.7 mmol) and equipped with a stir bar was added  $\text{MeOH}$  (298 mL) and  $\text{KOH}$  (1 M in  $\text{MeOH}$ , 132 mL). The reaction mixture was heated to  $50\text{ }^\circ\text{C}$  *via* oil bath and allowed to stir for 16 hours. The reaction mixture was then cooled to room temperature and concentrated *in vacuo*, yielding a crude yellow residue. The residue was partitioned between  $\text{Et}_2\text{O}$  (500 mL) and sat. aqueous  $\text{NH}_4\text{Cl}$  (500 mL). The aqueous layer was then extracted with  $\text{Et}_2\text{O}$  (2 x 500 mL). The organic extracts were dried over  $\text{MgSO}_4$ , filtered, and concentrated *in vacuo*. The crude hydrindanone (1:3 *dr* by  $^1\text{H}$  NMR integration of the unpurified sample) was purified by column chromatography ( $\text{SiO}_2$ , 1%  $\text{Et}_2\text{O}$  in hexanes) to afford **cis-hydrindanone S14** and **trans-hydrindanone 47**. The **cis-hydrindanone S14** was resubject to the above conditions 9 times, affording **trans-hydrindanone 47** (14.5 g, 79% overall) as a colorless oil.

#### **trans-hydrindanone 47**

$^1\text{H NMR}$  (500 MHz,  $\text{CDCl}_3$ )  $\delta$  5.79 (ddt,  $J = 17.0, 10.2, 6.4$  Hz, 1H), 4.97 (d,  $J = 17.0$  Hz, 1H), 4.89 (d,  $J = 10.2$  Hz, 1H), 2.36-2.17 (m, 3H), 2.14-2.03 (m, 1H), 2.02-1.82 (m, 4H), 1.82-1.64 (m, 2H), 1.53-1.42 (m, 2H), 1.41-1.29 (m, 2H), 1.35 (s, 3H), 1.06 (s, 3H), 0.85 (s, 9H), 0.09 (s, 3H), 0.07 (s, 3H) ppm;  $^{13}\text{C DEPTQ}$  (125 MHz,  $\text{CDCl}_3$ )  $\delta$  209.8, 139.6, 114.0, 74.9, 59.7, 53.0, 42.5, 41.8, 41.6, 40.5, 37.3, 29.8, 25.9, 21.5, 20.1, -1.81, -1.84 ppm;  $[\alpha]_D^{22.4} = +22.4$  (c 1.99,  $\text{CH}_2\text{Cl}_2$ ); **FTIR** (film)  $\nu_{\text{max}}$  3076, 2955, 2930, 2856, 1716, 1641  $\text{cm}^{-1}$ ; **HRMS** (CI) calculated for  $\text{C}_{21}\text{H}_{38}\text{O}_2\text{Si}$   $[\text{M}-(t\text{-Bu})+\text{H}]^+$  293.1937 found 293.1927.

### *cis*-hydrindanone **514**

$^1\text{H NMR}$  (500 MHz,  $\text{CDCl}_3$ )  $\delta$  5.75 (ddt,  $J = 17.0, 10.3, 6.5$  Hz, 1H), 4.96 (dq,  $J = 17.0, 1.6$  Hz, 1H), 4.88 (d,  $J = 10.3$ , 1H), 2.57-2.43 (m, 3H), 2.12-1.99 (m, 3H), 1.98-1.89 (m, 1H), 1.88-1.78 (m, 1H), 1.78-1.66 (m, 2H), 1.49-1.32 (m, 3H), 1.30-1.18 (m, 1H), 1.26 (s, 3H), 1.07 (s, 3H), 0.81 (s, 9H), 0.07 (s, 6H);  $^{13}\text{C DEPTQ}$  (125 MHz,  $\text{CDCl}_3$ )  $\delta$  214.0, 139.4, 114.2, 114.0, 74.4, 60.7, 53.1, 47.1, 37.7, 36.9, 36.2, 32.9, 27.9, 27.0, 25.9, 18.4, -1.9, -2.1 ppm;  $[\alpha]_{\text{D}}^{22.5} = -15.4$  (c 2.02,  $\text{CH}_2\text{Cl}_2$ ); **FTIR** (film)  $\nu_{\text{max}}$  3075, 2953, 2929, 2856, 1694, 1641  $\text{cm}^{-1}$ ; **HRMS** (CI) calculated for  $\text{C}_{21}\text{H}_{38}\text{O}_2\text{Si}$   $[\text{M}+\text{H}]^+$  351.2719 found 351.2734.

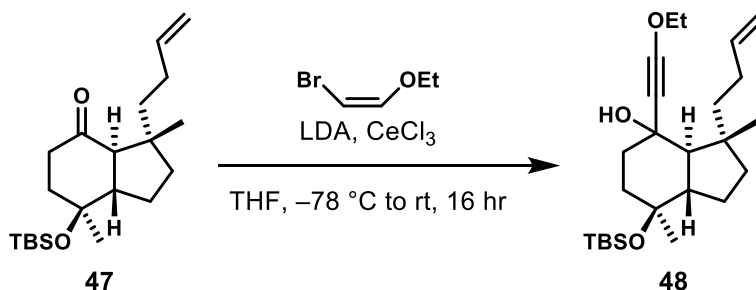

To a 3-necked 1 L round bottom flask equipped with a stir bar was added THF (220 mL) and  $i\text{-Pr}_2\text{NH}$  (22.6 mL, 161 mmol). The solution was cooled to  $-78^\circ\text{C}$  *via*  $\text{Me}_2\text{CO}/\text{CO}_2(\text{s})$  bath, and  $n\text{-BuLi}$  (2.75 M, 57.6 mL, 158 mmol) was added dropwise *via* addition funnel. The mixture was allowed to warm to  $0^\circ\text{C}$  in an ice bath, then allowed to stir for 30 minutes. The mixture was then cooled to  $-78^\circ\text{C}$  *via*  $\text{Me}_2\text{CO}/\text{CO}_2(\text{s})$  bath, and 1-bromo-2-ethoxyethene (8.59 mL, 80.7 mmol) was added dropwise *via* addition funnel. The mixture was allowed to warm to  $0^\circ\text{C}$  in an ice bath, then allowed to stir for 2.5 hours. The mixture was then cooled to  $-78^\circ\text{C}$  *via*  $\text{Me}_2\text{CO}/\text{CO}_2(\text{s})$  bath, and anhydrous  $\text{CeCl}_3$  (21.5 g, 87.1 mmol) was added in one portion. The resulting slurry was allowed to stir at  $-78^\circ\text{C}$  for 30 minutes. **Hydrindanone 47** (11.1 g, 31.7 mmol) was then added as a solution in THF (20 mL) at  $-78^\circ\text{C}$ , rinsing with THF (10 mL). The reaction mixture was allowed to warm to room temperature, then allowed to stir for 16 hours. Upon consumption of starting material as indicated by TLC analysis, the reaction mixture was quenched at  $-78^\circ\text{C}$  with solid  $\text{NH}_4\text{Cl}$ . The resulting slurry was allowed to warm to room temperature, stirring vigorously for 15 minutes. The mixture was then filtered through a pad of silica, rinsing with  $\text{Et}_2\text{O}$ , and the filtrate was concentrated *in vacuo*. The crude material was purified by column chromatography ( $\text{SiO}_2$ , 5%  $\text{Et}_2\text{O}$  in hexanes) to afford **alkynyl ether 48** (10.8 g, 84%) as a colorless oil (inconsequential mixture of diastereomers).

Note: individual diastereomers were isolated for characterization purposes only. Otherwise, the diastereomeric mixture was isolated together and taken onto the next step.

### less polar diastereomer of alkynyl ether **48**

$^1\text{H NMR}$  (500 MHz,  $\text{CDCl}_3$ )  $\delta$  5.83 (ddt,  $J = 17.0, 10.3, 6.5$  Hz, 1H), 5.00 (dq,  $J = 17.0, 1.5$  Hz, 1H), 4.91 (dq,  $J = 10.3, 1.0$  Hz, 1H), 4.06 (q,  $J = 7.0$  Hz, 2H), 2.19 (ddd,  $J = 13.2, 10.3, 7.4$  Hz, 1H), 2.14-2.00 (m, 2H), 1.19-1.80 (m, 3H), 1.70-1.47 (m, 6H), 1.35 (t,  $J = 7.0$  Hz, 3H), 1.28-1.20 (m, 3H), 1.17 (s, 3H), 1.14 (s, 3H), 0.84 (s, 9H), 0.07 (s, 3H), 0.06 (s, 3H) ppm;  $^{13}\text{C NMR}$  (125 MHz,  $\text{CDCl}_3$ )  $\delta$  140.0, 113.8, 93.4, 75.9, 74.3, 67.6, 56.4, 48.5, 43.6, 42.9, 42.5, 42.4, 38.1, 37.8, 29.7, 26.0, 24.5, 22.9, 20.3, 18.3, 14.7, -1.71, -1.75 ppm;  $[\alpha]_{\text{D}}^{22.7} = +32.2$  (c 1.28,  $\text{CH}_2\text{Cl}_2$ ); **FTIR** (film)  $\nu_{\text{max}}$  3505 (br), 2954, 2929, 2856, 2260, 1640  $\text{cm}^{-1}$  **HRMS** (ESI) calculated for  $\text{C}_{25}\text{H}_{44}\text{O}_3\text{Si}$   $[\text{M}+\text{Na}]^+$  443.2957 found 443.2944.

### more polar diastereomer of alkynyl ether **48**

$^1\text{H NMR}$  (500 MHz,  $\text{CDCl}_3$ )  $\delta$  5.82 (ddt,  $J = 17.1, 10.3, 6.5$  Hz, 1H), 4.99 (dq,  $J = 17.1, 1.7$  Hz, 1H), 4.89 (dq,  $J = 10.3, 1.0$  Hz, 1H), 4.09 (q,  $J = 7.1$  Hz, 2H), 2.17-1.97 (m, 3H), 1.88 (td,  $J = 13.5, 3.8$  Hz, 1H), 1.78 (s, 1H), 1.77-1.59 (m, 5H), 1.49 (ddd,  $J = 12.4, 9.5, 5.0$  Hz, 1H), 1.43-1.24 (m, 5H), 1.39 (t,  $J = 7.1$  Hz, 3H), 1.21 (s, 3H), 1.17 (s, 3H), 0.85 (s, 9H), 0.08 (s, 3H), 0.07 (s, 3H) ppm;  $^{13}\text{C NMR}$  (125 MHz,  $\text{CDCl}_3$ )  $\delta$  140.1, 113.8, 96.5, 75.9, 74.3, 72.9, 57.9, 51.5, 44.5, 43.81, 43.76, 41.0, 40.7, 38.6, 31.7, 25.9, 23.1, 22.9, 22.8, 21.1, 18.2, 14.7, 14.3, -1.7, -1.8 ppm;  $[\alpha]_{\text{D}}^{22.4} = -11.2$  (c 2.41,  $\text{CH}_2\text{Cl}_2$ ); **FTIR** (film)  $\nu_{\text{max}}$  3451 (br), 2952, 2928, 2856, 2257, 1640  $\text{cm}^{-1}$ ; **HRMS** (ESI) calculated for  $\text{C}_{25}\text{H}_{44}\text{O}_3\text{Si}$   $[\text{M}+\text{Na}]^+$  443.2957 found 443.2953.

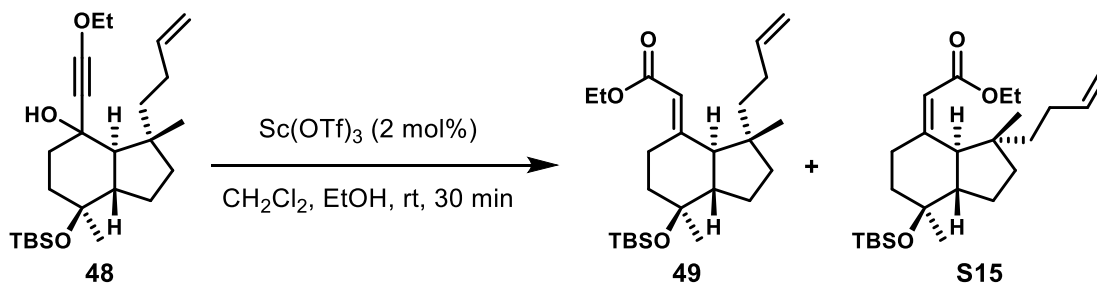

To a 500 mL round bottom flask equipped with a stir bar was added **alkynyl ether 48** (12.0 g, 29.4 mmol), and a 30:1 mixture of  $\text{CH}_2\text{Cl}_2/\text{EtOH}$  (200 mL). The mixture was allowed to stir at room temperature until dissolved, then cooled to 0 °C *via* ice bath.  $\text{Sc}(\text{OTf})_3$  (290 mg, 0.589 mmol) was added, and the reaction mixture was allowed to warm to room temperature and stir for 30 minutes. Upon consumption of starting material as indicated by TLC analysis, the reaction mixture was diluted with hexanes (300 mL) and filtered through a plug of silica, rinsing with  $\text{Et}_2\text{O}$ . The filtrate was then concentrated *in vacuo*. The crude product was purified by column chromatography ( $\text{SiO}_2$ , 2% to 5%  $\text{Et}_2\text{O}$  in hexanes, stepped gradient) affording a mixture of *E*-enoate ester **49** and *Z*-enoate ester **S15** (10.2 g, 85%) as a colorless oil (inconsequential 2:1 mixture of diastereomers).

Note: individual diastereomers were isolated for characterization purposes only. Otherwise, the diastereomeric mixture was isolated together and taken onto the next step.

#### *Z*-enoate ester **S15**

$^1\text{H NMR}$  (600 MHz,  $\text{CDCl}_3$ )  $\delta$  5.81 (ddt,  $J = 16.8, 10.3, 6.5$  Hz, 1H), 5.77 (bs, 1H), 4.99 (d,  $J = 17.1$  Hz, 1H), 4.89 (d,  $J = 10.2$  Hz, 1H), 4.15 (dq,  $J = 10.9, 7.3$  Hz, 1H), 4.05 (dq,  $J = 10.9, 7.3$  Hz, 1H), 2.94 (d,  $J = 13.4$  Hz, 1H), 2.71-2.61 (m, 1H), 2.42 (td,  $J = 12.8, 5.7$  Hz, 1H), 2.11-1.96 (m, 4H), 1.76 (appar. t,  $J = 11.6$  Hz, 1H), 1.69-1.59 (m, 2H), 1.50-1.37 (m, 3H), 1.32-1.23 (m, 1H), 1.26 (t,  $J = 7.2$  Hz, 3H), 1.12 (s, 3H), 0.89 (s, 3H), 0.86 (s, 9H), 0.08 (s, 3H), 0.06 (s, 3H) ppm;  $^{13}\text{C NMR}$  (125 MHz,  $\text{CDCl}_3$ )  $\delta$  167.3, 159.7, 140.0, 116.6, 113.8, 74.4, 59.8, 51.1, 51.0, 45.8, 43.8, 42.6, 30.7, 35.5, 29.8, 26.0, 24.8, 23.2, 23.0, 18.2, 14.4, -1.8, -1.9 ppm;  $[\alpha]_{\text{D}}^{22.4} = +74.9$  (c 1.00,  $\text{CHCl}_3$ ); **FTIR** (film)  $\nu_{\text{max}}$  2956, 2930, 2856, 1720, 1641  $\text{cm}^{-1}$ ; **HRMS** (CI) calculated for  $\text{C}_{25}\text{H}_{44}\text{O}_3\text{Si}$   $[\text{M}]^+$  420.3060 found 420.3047.

#### *E*-enoate ester **49**

$^1\text{H NMR}$  (600 MHz,  $\text{CDCl}_3$ )  $\delta$  5.86-5.78 (m, 1H), 5.69 (bs, 1H), 5.01 (d,  $J = 17.1$  Hz, 1H), 4.93 (d,  $J = 10.0$  Hz, 1H), 4.15 (q,  $J = 7.3$  Hz, 2H), 3.90-3.84 (m, 1H), 2.16-2.06 (m, 2H), 2.00 (tt,  $J = 12.6, 7.2$  Hz, 1H), 1.87-1.75 (m, 4H), 1.72-1.56 (m, 2H), 1.54-1.48 (m, 1H), 1.45-1.39 (m, 2H), 1.36 (td,  $J = 12.6, 4.8$  Hz, 1H), 1.29 (t,  $J = 7.1$  Hz, 2H), 1.25 (s, 3H), 1.06 (s, 3H), 0.83 (s, 9H), 0.07 (s, 3H), 0.05 (s, 3H) ppm;  $^{13}\text{C NMR}$  (125 MHz,  $\text{CDCl}_3$ )  $\delta$  167.2, 160.9, 139.6, 114.2, 112.6, 75.5, 59.9, 55.5, 53.4, 43.5, 42.9, 40.6, 39.3, 29.9, 29.5, 28.1, 25.9, 21.2, 20.3, 20.1, 18.2, 14.5, -1.78, -1.80 ppm;  $[\alpha]_{\text{D}}^{22.4} = -30.2$  (c 1.00,  $\text{CHCl}_3$ ); **FTIR** (film)  $\nu_{\text{max}}$  2955, 2928, 2855, 1717, 1644  $\text{cm}^{-1}$ ; **HRMS** (CI) calculated for  $\text{C}_{25}\text{H}_{44}\text{O}_3\text{Si}$   $[\text{M}]^+$  420.3060 found 420.3062.

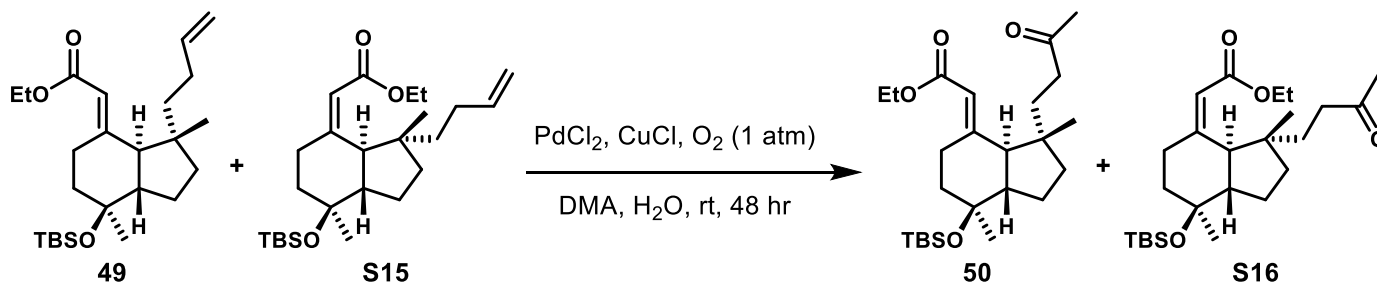

To a 250 mL round bottom flask equipped with a stir bar was added a mixture of *E*-enoate ester **49** and *Z*-enoate ester **S15** (3.23 g, 7.68 mmol), DMA (70 mL), and water (7 mL). The mixture was allowed to stir at room temperature until dissolved, then freshly purified  $\text{CuCl}$  (3.19 g, 32.2 mmol) and  $\text{PdCl}_2$  (1.02 g, 5.76 mmol) were added. The reaction mixture was sparged with  $\text{O}_2$  for 15 min, then allowed

to stir under an atmosphere of O<sub>2</sub> for 48 hours. The reaction mixture was then filtered through Celite®, rinsing with Et<sub>2</sub>O (400 mL). The filtrate was washed with H<sub>2</sub>O (5 x 100 mL) and brine (100 mL), dried over MgSO<sub>4</sub>, filtered, and concentrated *in vacuo*. The crude product was purified by column chromatography (SiO<sub>2</sub>, 10% Et<sub>2</sub>O in hexanes) affording **E-ketoester 50** and **Z-ketoester S16** (2.88 g, 86%) as a yellow oil (inconsequential 2:1 mixture of diastereomers).

Note: individual diastereomers were isolated for characterization purposes only. Otherwise, the diastereomeric mixture was isolated together and taken onto the next step.

#### Z-ketoester S16

<sup>1</sup>H NMR (600 MHz, CDCl<sub>3</sub>) δ 5.78 (bs, 1H), 4.18-4.03 (m, 2H), 2.93 (d, *J* = 13.4 Hz, 1H), 2.71-2.55 (m, 2H), 2.46-2.31 (m, 2H), 2.15 (s, 3H), 2.07 (dd, *J* = 13.7, 7.2 Hz, 1H), 2.00 (dd, *J* = 12.7, 5.5 Hz, 1H), 1.72-1.54 (m, 5H), 1.44 (dt, *J* = 13.2, 9.1 Hz, 1H), 1.31-1.20 (m, 1H), 1.26 (s, 3H), 1.12 (s, 3H), 0.89 (s, 3H), 0.86 (s, 9H), 0.08 (s, 3H), 0.06 (s, 3H) ppm; <sup>13</sup>C NMR (125 MHz, CDCl<sub>3</sub>) δ 209.9, 167.2, 159.7, 116.8, 74.2, 59.9, 51.3, 49.6, 45.0, 43.7, 40.0, 36.9, 36.4, 35.5, 30.0, 26.0, 24.8, 24.4, 23.4, 18.2, 14.3, -1.8, -1.9 ppm; [α]<sub>D</sub><sup>22.5</sup> = +27.2 (c 1.23, CH<sub>2</sub>Cl<sub>2</sub>); FTIR (film) ν<sub>max</sub> 2955, 2929, 2856, 1716, 1643 cm<sup>-1</sup>; HRMS (ESI) calculated for C<sub>25</sub>H<sub>44</sub>O<sub>4</sub>Si [M+Na]<sup>+</sup> 459.2906 found 459.2919.

#### E-ketoester 50

<sup>1</sup>H NMR (600 MHz, CDCl<sub>3</sub>) δ 5.67 (bs, 1H), 4.13 (q, *J* = 7.1 Hz, 2H), 3.91-3.84 (m, 1H), 2.50 (ddd, *J* = 16.6, 11.7, 4.8 Hz, 1H), 2.38 (ddd, *J* = 16.6, 11.6, 4.8 Hz, 1H), 2.16 (s, 3H), 2.13-2.06 (m, 1H), 2.01 (ddd, *J* = 14.0, 11.8, 4.8 Hz, 1H), 1.87-1.74 (m, 3H), 1.66 (dq, *J* = 13.8, 8.9 Hz, 1H), 1.59-1.47 (m, 3H), 1.45-1.30 (m, 2H), 1.27 (t, *J* = 7.1 Hz, 3H), 1.24 (s, 3H), 1.05 (s, 3H), 0.82 (s, 9H), 0.06 (s, 3H), 0.05 (s, 3H) ppm; <sup>13</sup>C NMR (125 MHz, CDCl<sub>3</sub>) δ 209.2, 167.0, 160.4, 112.7, 75.5, 59.9, 55.6, 53.5, 42.9, 42.8, 39.7, 39.2, 34.8, 30.1, 28.0, 25.9, 21.1, 20.3, 19.8, 18.2, 14.5, -1.79, -1.81 ppm; [α]<sub>D</sub><sup>22.7</sup> = -91.5 (c 1.94, CH<sub>2</sub>Cl<sub>2</sub>); FTIR (film) ν<sub>max</sub> 2955, 2929, 2856, 1714, 1645 cm<sup>-1</sup>; HRMS (CI) calculated for C<sub>25</sub>H<sub>44</sub>O<sub>4</sub>Si [M]<sup>+</sup> 436.3009 found 436.2993.

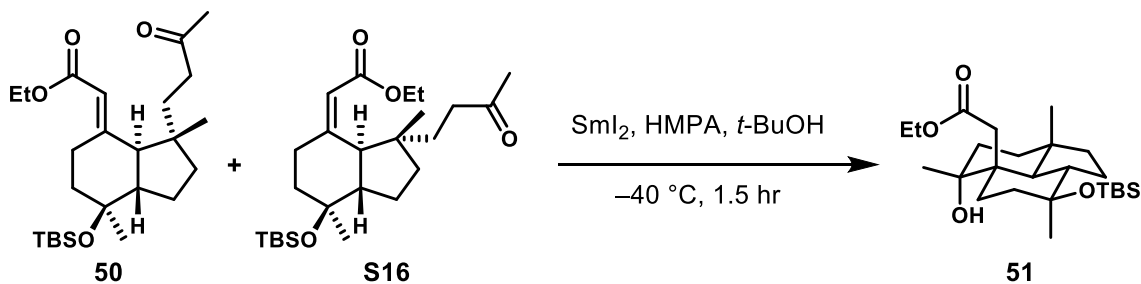

To a 500 mL round bottom flask equipped with a stir bar was added freshly synthesized SmI<sub>2</sub><sup>6</sup> (0.0975 M in THF, 106 mL, 10.3 mmol) and HMPA (28.8 mL, 165 mmol). The mixture was allowed to stir at room temperature for 30 minutes. THF (61 mL) was added, and the mixture was cooled to -40 °C *via* MeCN/CO<sub>2</sub>(s) bath. A solution of ketoesters **50**, **S16** (1.80 g, 4.13 mmol) and *t*-BuOH (830 μL, 8.68 mmol) in THF (25 mL) was added dropwise, rinsing with THF (10 mL). The reaction mixture was allowed to stir at -40 °C for 1.5 hours, then quenched at -40 °C with a solution of 1:1 NaHCO<sub>3</sub>(aq) : Na<sub>2</sub>S<sub>2</sub>O<sub>3</sub>(aq) (100 mL) and allowed to warm to room temperature. The resulting mixture was extracted with Et<sub>2</sub>O (3 x 75 mL). The organic extracts were dried over MgSO<sub>4</sub>, filtered, and concentrated *in vacuo*. The resulting solution of crude product with HMPA was dissolved in Et<sub>2</sub>O (200 mL), then washed with water (5 x 100 mL) and brine (75 mL). The organic extract was dried over MgSO<sub>4</sub>, filtered, and concentrated *in vacuo*. The crude product was purified by column chromatography (SiO<sub>2</sub>, 6% EtOAc in hexanes) affording hydroxyester **51** (1.59 g, 88%) as a colorless oil.

#### hydroxyester 51

<sup>1</sup>H NMR (600 MHz, CDCl<sub>3</sub>) δ 4.14 (dq, *J* = 10.8, 7.3 Hz, 1H), 4.07 (dq, *J* = 10.8, 7.3 Hz, 1H), 2.79 (d, *J* = 13.5 Hz, 1H), 2.40 (d, *J* = 13.5 Hz, 1H), 2.20 (dt, *J* = 13.5, 3.6 Hz, 1H), 2.11-2.04 (m, 2H), 1.96 (dt, *J* = 17.6, 2.3 Hz, 1H), 1.87 (td, *J* = 13.5, 3.6 Hz, 1H), 1.78-1.71 (m, 1H), 1.69 (s, 3H), 1.65 (dt, *J* = 13.5, 3.6 Hz, 1H), 1.64-1.60 (m, 1H), 1.56 (ddd, *J* = 12.2, 8.8, 1.3 Hz, 1H), 1.28 (d, *J* = 14.0 Hz, 1H), 1.25 (t, 3H, *J* = 7.3 Hz), 1.21 (q, *J* = 11.3 Hz, 1H), 1.16 (s, 3H), 1.01 (td, *J* = 13.5, 3.6 Hz, 1H), 0.89 (s, 3H), 0.85 (s, 9H), 0.09 (s, 3H), 0.08 (s, 3H) ppm; <sup>13</sup>C NMR (150 MHz, CDCl<sub>3</sub>) δ 173.5, 141.1, 122.7, 77.1, 60.3, 56.6, 44.9, 43.0, 42.3, 40.7, 39.8, 38.4, 37.2, 33.3, 25.9, 22.3, 22.2, 21.3,

19.0, 18.2, 14.3, -1.7, -1.8 ppm;  $[\alpha]_D^{22.4} = +14.1$  (c 1.68, CH<sub>2</sub>Cl<sub>2</sub>); **FTIR** (film)  $\nu_{\max}$  3536 (br), 2953, 2929, 2856, 1722 cm<sup>-1</sup>; **HRMS** (CI) calculated for C<sub>25</sub>H<sub>46</sub>O<sub>4</sub>Si [M+H]<sup>+</sup> 439.3244 found 439.3266.

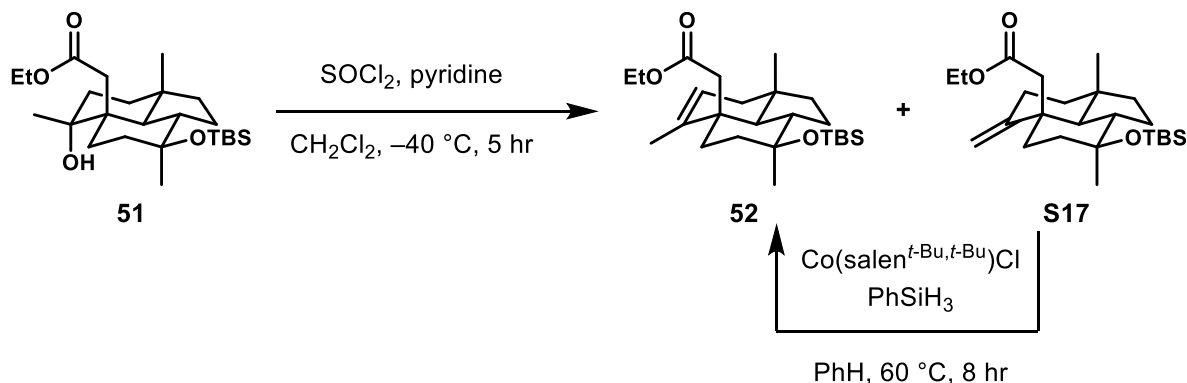

To a 250 mL round bottom flask equipped with a stir bar was added **hydroxyester 51** (1.37 g, 3.13 mmol), pyridine (31 mL), and CH<sub>2</sub>Cl<sub>2</sub> (31 mL). The mixture was allowed to stir at room temperature until dissolved, then cooled to -40 °C *via* MeCN/CO<sub>2(s)</sub> bath. SOCl<sub>2</sub> (250 μL, 3.44 mmol) was added dropwise, and the reaction mixture was allowed to stir at -40 °C for 5 hours. The reaction mixture was quenched at -40 °C with saturated NaHCO<sub>3(aq)</sub> (100 mL) and allowed to warm to room temperature. The organic layer was separated, and the aqueous phase was extracted with CH<sub>2</sub>Cl<sub>2</sub> (4 x 200 mL). The organic extracts were dried over MgSO<sub>4</sub>, filtered, and concentrated *in vacuo*. The crude product was purified by column chromatography (SiO<sub>2</sub>, 0.5% to 2% Et<sub>2</sub>O in hexanes, stepped gradient) affording **endocyclic alkene 52** (963 mg, 73%) and **exocyclic alkene S17** (124 mg, 9%) as colorless oils.

The exocyclic alkene isomer can be isomerized to the *endo* isomer with the following procedure:

To a 25 mL round bottom flask equipped with stir bar was added **exocyclic alkene S17** (327 mg, 0.775 mmol) and Co(salen<sup>tBu, tBu</sup>)Cl (14.7 mg, 0.0231 mmol). The reaction vessel was evacuated and backfilled with argon three times. Degassed PhH (7.8 mL) was added, followed by PhSiH<sub>3</sub> (5.7 μL, 0.0465 mmol). The reaction mixture was heated to 60 °C *via* oil bath, and allowed to stir for 8 hours. The reaction mixture was then allowed to cool to room temperature, and concentrated *in vacuo*. The crude residue (5.4:1 *endocyclic:exocyclic*, based on <sup>1</sup>H NMR integration of the crude sample) was purified by column chromatography (SiO<sub>2</sub>, 0.5% to 2% Et<sub>2</sub>O in hexanes, stepped gradient) affording **endocyclic alkene 52** (241 mg, 74%) and **exocyclic alkene S17** (72.5 mg, 22%) as colorless oils.

#### endocyclic alkene 52

<sup>1</sup>H NMR (600 MHz, CDCl<sub>3</sub>) δ 5.25 (s, 1H), 4.15 (dq, *J* = 10.8, 7.3 Hz, 1H), 4.08 (dq, *J* = 10.8, 7.3 Hz, 1H), 2.80 (d, *J* = 13.6 Hz, 1H), 2.40 (d, *J* = 13.6 Hz, 1H), 2.20 (dt, *J* = 13.6, 3.4 Hz, 1H), 2.11-2.04 (m, 2H), 1.97 (dt, *J* = 17.7, 2.0 Hz, 1H), 1.87 (td, *J* = 13.6, 3.4 Hz, 1H), 1.74 (dq, *J* = 14.0, 9.4 Hz, 1H), 1.69 (s, 3H), 1.65 (dt, *J* = 13.6, 3.4 Hz, 1H), 1.64-1.60 (m, 1H), 1.57 (dd, *J* = 12.2, 8.8 Hz, 1H), 1.29 (d, *J* = 13.6 Hz, 1H), 1.26 (t, *J* = 7.3 Hz, 3H), 1.21 (q, *J* = 11.4 Hz, 1H), 1.16 (s, 3H), 1.02 (td, *J* = 13.6, 3.4 Hz, 1H), 0.89 (s, 3H), 0.86 (s, 9H), 0.09 (s, 3H), 0.08 (s, 3H) ppm; <sup>13</sup>C NMR (150 MHz, CDCl<sub>3</sub>) δ 173.5, 141.1, 122.8, 77.1, 60.3, 56.6, 44.9, 43.0, 42.3, 40.7, 39.9, 38.5, 37.2, 33.3, 26.0, 22.3, 22.2, 21.3, 19.0, 18.2, 14.3, -1.7, -1.8 ppm;  $[\alpha]_D^{22.6} = +48.1$  (c 1.19, CH<sub>2</sub>Cl<sub>2</sub>); **FTIR** (film)  $\nu_{\max}$  2954, 2928, 2900, 2857 cm<sup>-1</sup>; **HRMS** (CI) calculated for C<sub>25</sub>H<sub>44</sub>O<sub>3</sub>Si [M+H]<sup>+</sup> 421.3138 found 421.3124.

#### exocyclic alkene S17

<sup>1</sup>H NMR (600 MHz, CDCl<sub>3</sub>) δ 4.81 (s, 1H), 4.58 (s, 1H), 4.04 (q, *J* = 7.2 Hz, 2H), 2.61-2.51 (m, 3H), 2.17 (dt, *J* = 14.5, 2.5 Hz, 1H), 2.01 (dt, *J* = 14.5, 3.1 Hz, 1H), 1.98 (ddd, *J* = 14.5, 10.8, 6.3 Hz, 1H), 1.84-1.76 (m, 2H), 1.73 (dq, *J* = 14.5, 9.3 Hz, 1H), 1.67 (dt, *J* = 13.5, 3.1 Hz, 1H), 1.61-1.57 (m, 1H), 1.40 (dd, *J* = 11.7, 9.2, 1H), 1.29 (dd, *J* = 14.5, 3.1 Hz, 1H), 1.24 (dd, *J* = 14.5, 3.1 Hz, 1H), 1.20 (t, *J* = 7.2 Hz, 3H), 1.14 (s, 3H), 1.06 (q, *J* = 10.8 Hz, 1H), 1.00 (s, 3H), 0.94 (d, *J* = 9.3 Hz, 1H), 0.85 (s, 9H), 0.09 (s, 3H), 0.08 (s, 3H) ppm; <sup>13</sup>C NMR (125 MHz, CDCl<sub>3</sub>) δ 172.2, 154.4, 108.5, 76.8, 60.0, 58.1, 44.7, 42.6, 42.4, 41.1, 40.6, 39.4, 34.8, 32.9, 30.5, 26.0, 22.2, 21.1, 20.0, 18.2, 14.4, -1.69, -1.72 ppm;  $[\alpha]_D^{22.5} = -16.4$  (c 1.24, CH<sub>2</sub>Cl<sub>2</sub>); **FTIR** (film)  $\nu_{\max}$  3081, 2955, 2929, 2855, 1734, 1640 cm<sup>-1</sup>; **HRMS** (ESI) calculated for C<sub>25</sub>H<sub>44</sub>O<sub>3</sub>Si [M+Na]<sup>+</sup> 443.2957 found 443.2959.

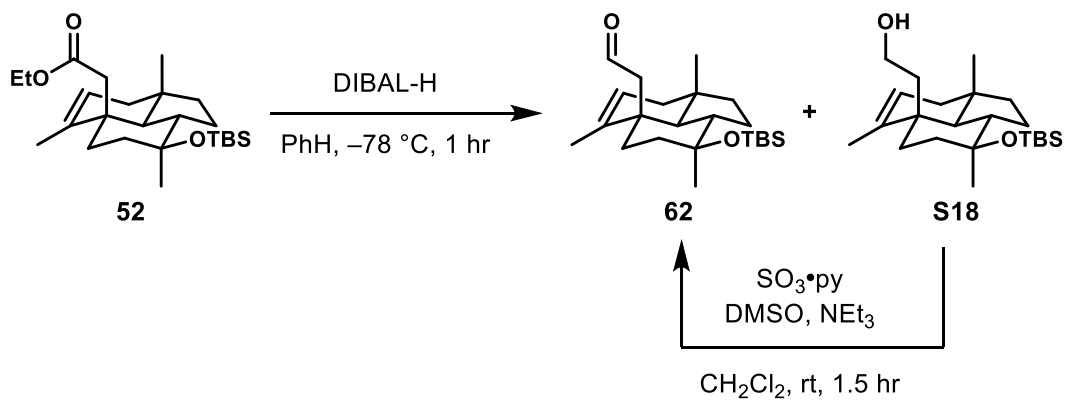

To a 100 mL round bottom flask equipped with a stir bar was added **endocyclic alkene 52** (1.04 g, 2.48 mmol) and PhMe (25 mL). The mixture was stirred at room temperature until dissolved, then cooled to  $-78^\circ\text{C}$  *via*  $\text{Me}_2\text{CO}/\text{CO}_2(\text{s})$  bath. Neat DIBAL-H (486  $\mu\text{L}$ , 2.73 mmol) was added dropwise. The reaction mixture was allowed to stir at  $-78^\circ\text{C}$  for 1 hour, then quenched at  $-78^\circ\text{C}$  by dropwise addition of MeOH (200  $\mu\text{L}$ ). The quenched reaction mixture was allowed to warm to room temperature, then saturated Rochelle's salt (30 mL) and  $\text{Et}_2\text{O}$  (15 mL) were added. The resulting slurry was allowed to stir at room temperature for 1 hour. The organic layer was separated, and the aqueous phase was extracted with  $\text{Et}_2\text{O}$  (4 x 15 mL). The organic extracts were dried over  $\text{MgSO}_4$ , filtered, and concentrated *in vacuo*. The crude product was purified by column chromatography ( $\text{SiO}_2$ , 2% to 20%  $\text{Et}_2\text{O}$  in hexanes, stepped gradient) affording **aldehyde 62** (794 mg, 85%) and overreduced **alcohol S18** (113 mg, 12%) as colorless oils.

The alcohol can be oxidized to the desired aldehyde *via* Parikh–Doering oxidation:

To a 15 mL round bottom flask equipped with a stir bar was added **alcohol S18** (140 mg, 0.370 mmol),  $\text{NEt}_3$  (260  $\mu\text{L}$ , 1.85 mmol), DMSO (930  $\mu\text{L}$ ) and  $\text{CH}_2\text{Cl}_2$  (3.70 mL). The mixture was allowed to stir until dissolved at room temperature, then cooled to  $0^\circ\text{C}$  *via* ice bath.  $\text{SO}_3\cdot\text{py}$  (176 mg, 1.10 mmol) was added, and the reaction mixture was allowed to warm to room temperature and stir for 1.5 hours. Water (5 mL) was added, and the organic layer was separated. The aqueous layer was extracted with  $\text{CH}_2\text{Cl}_2$  (3 x 10 mL). The organic extracts were dried over  $\text{MgSO}_4$ , filtered, and concentrated *in vacuo*. The crude product was purified by column chromatography ( $\text{SiO}_2$ , 2%  $\text{Et}_2\text{O}$  in hexanes) affording **aldehyde 62** (135 mg, 97%) as a colorless oil.

#### aldehyde 62

$^1\text{H NMR}$  (500 MHz,  $\text{CDCl}_3$ )  $\delta$  9.95 (s, 1H), 5.32 (s, 1H), 2.71 (d,  $J = 15.2$  Hz, 1H), 2.52 (d,  $J = 15.2$  Hz, 1H), 2.12-2.04 (m, 2H), 1.99 (s, 1H), 1.96 (s, 1H), 1.81-1.61 (m, 4H), 1.70 (s, 3H), 1.27 (d,  $J = 14.1$  Hz, 1H), 1.23 (q,  $J = 11.4$  Hz, 1H), 1.18 (s, 3H), 1.14 (dd,  $J = 13.1, 4.5$  Hz, 1H), 0.85 (s, 9H), 0.84 (s, 3H), 0.08 (s, 6H) ppm;  $^{13}\text{C NMR}$  (125 MHz,  $\text{CDCl}_3$ )  $\delta$  204.1, 139.5, 123.9, 77.0, 56.3, 46.2, 45.1, 42.6, 42.2, 40.7, 39.5, 38.5, 34.7, 25.9, 22.3, 21.9, 21.2, 19.2, 18.2,  $-1.71, -1.74$  ppm;  $[\alpha]_{\text{D}}^{22.4} = +76.0$  (c 1.68,  $\text{CH}_2\text{Cl}_2$ ); **FTIR** (film)  $\nu_{\text{max}}$  2953, 2928, 2856, 1717  $\text{cm}^{-1}$ ; **HRMS** (CI) calculated for  $\text{C}_{23}\text{H}_{40}\text{O}_2\text{Si}$   $[\text{M}+\text{H}]^+$  377.2876 found 377.2877.

#### alcohol S18

$^1\text{H NMR}$  (500 MHz,  $\text{CDCl}_3$ )  $\delta$  5.21 (ddq,  $J = 3.8, 2.8, 1.5$  Hz, 1H), 3.87 (ddd,  $J = 11.4, 10.4, 5.6$  Hz, 1H), 3.77 (ddd,  $J = 11.4, 10.4, 5.3$  Hz, 1H), 2.15 (tdd,  $J = 13.3, 11.4, 5.6$  Hz, 1H), 2.06 (ddd,  $J = 17.7, 4.5, 1.3$  Hz, 1H), 1.96 (dt,  $J = 17.7, 2.4$  Hz, 1H), 1.80-1.70 (m, 3H), 1.70 (s, 3H), 1.66-1.54 (m, 5H), 1.22-1.18 (m, 2H), 1.16 (s, 3H), 1.01-0.94 (m, 1H), 0.92 (s, 3H), 0.86 (s, 9H), 0.08 (s, 6H) ppm;  $^{13}\text{C NMR}$  (125 MHz,  $\text{CDCl}_3$ )  $\delta$  141.6, 122.7, 77.0, 61.1, 56.8, 45.0, 43.0, 42.5, 40.2, 39.5, 38.6, 35.5, 33.2, 26.0, 22.5, 22.4, 21.1, 20.0, 18.2,  $-1.67, -1.69$  ppm;  $[\alpha]_{\text{D}}^{22.6} = +52.7$  (c 1.83,  $\text{CH}_2\text{Cl}_2$ ); **FTIR** (film)  $\nu_{\text{max}}$  3324 (br), 2953, 2927, 2856  $\text{cm}^{-1}$ ; **HRMS** (CI) calculated for  $\text{C}_{23}\text{H}_{42}\text{O}_2\text{Si}$   $[\text{M}+\text{H}]^+$  379.3032 found 379.3033.



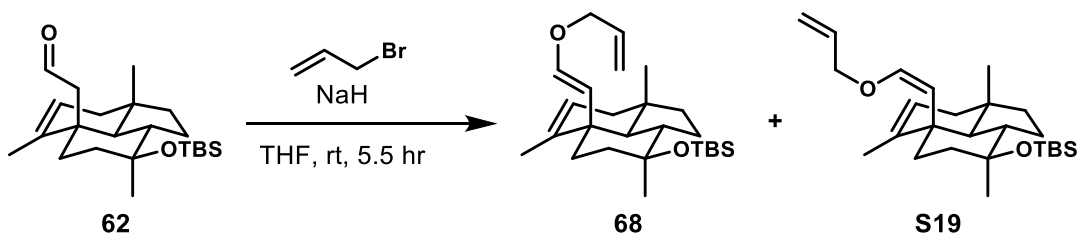

To a 100 mL round bottom flask equipped with a stir bar was added NaH (60% dispersion in mineral oil, 400 mg, 10.0 mmol). The solids were slurried in hexanes (10 mL) then allowed to settle to the bottom of the vessel and the supernatant was removed *via* syringe. This process was repeated three times to ensure the removal of mineral oil from the reaction vessel. THF (9.5 mL) was added to the reaction vessel and the mixture was allowed to stir at room temperature until a suspension was formed. A solution of **aldehyde 62** (754 mg, 2.00 mmol) in THF (7.5 mL) was added to the reaction vessel at room temperature, rinsing with THF (3 x 1 mL). The reaction mixture was allowed to stir at room temperature for 5.5 hours. Neat allyl bromide (518  $\mu$ L, 6.00 mmol) was added to the reaction vessel, and the reaction mixture was allowed to stir at room temperature for 18 hours. The reaction mixture was then cooled to 0 °C *via* ice bath and quenched with saturated NaHCO<sub>3(aq)</sub> (40 mL). The mixture was allowed to warm to room temperature and extracted with Et<sub>2</sub>O (3 x 120 mL). The organic extracts were dried over MgSO<sub>4</sub>, filtered, and concentrated *in vacuo*. The crude product was purified by column chromatography (SiO<sub>2</sub>, hexanes) affording **E-alkenyl ether 68** (681 mg, 82%) and **Z-alkenyl ether S19** (19 mg, 2%) as colorless oils.

#### **E-alkenyl ether 68**

<sup>1</sup>H NMR (500 MHz, CDCl<sub>3</sub>)  $\delta$  6.09 (d, *J* = 12.9 Hz, 1H), 5.94 (ddt, *J* = 16.6, 10.7, 5.4 Hz, 1H), 5.34-5.31 (m, 1H), 5.30 (d, *J* = 0.7 Hz, 1H), 5.22 (dd, *J* = 10.5, 1.3 Hz, 1H), 5.14 (d, *J* = 12.9 Hz, 1H), 4.23 (dd, *J* = 13.3, 5.4 Hz, 1H), 4.20 (dd, *J* = 13.6, 5.4 Hz, 1H), 2.15-2.03 (m, 2H), 1.95 (appar d, *J* = 17.5 Hz, 1H), 1.85 (td, *J* = 13.7, 4.0 Hz, 1H), 1.77-1.67 (m, 2H), 1.66 (d, *J* = 1.2 Hz, 3H), 1.64-1.56 (m, 2H), 1.26-1.17 (m, 1H), 1.16 (s, 3H), 0.88 (s, 3H), 0.85 (s, 9H), 0.08 (s, 6H) ppm; <sup>13</sup>C NMR (125 MHz, CDCl<sub>3</sub>)  $\delta$  146.9, 138.5, 134.0, 123.7, 117.4, 105.8, 77.4, 70.4, 55.8, 44.7, 42.8, 42.2, 41.4, 39.5, 38.9, 35.7, 25.9, 22.5, 21.7, 21.2, 18.2, 18.1, -1.8, -1.9 ppm; [ $\alpha$ ]<sub>D</sub><sup>22.4</sup> = +109.7 (c 1.00, CHCl<sub>3</sub>); FTIR (film)  $\nu_{\text{max}}$  2953, 2928, 2857, 1643 cm<sup>-1</sup>; HRMS (CI) calculated for C<sub>26</sub>H<sub>44</sub>O<sub>2</sub>Si [M-(*t*-Bu)]<sup>+</sup> 359.2406 found 359.2402.

#### **Z-alkenyl ether S19**

<sup>1</sup>H NMR (600 MHz, CDCl<sub>3</sub>)  $\delta$  5.95-5.82 (m, 2H), 5.30 (d, *J* = 17.2 Hz, 1H), 5.18 (d, *J* = 10.2 Hz, 1H), 5.18 (s, 1H), 4.38 (d, *J* = 7.5 Hz, 1H), 4.24 (dd, *J* = 13.5, 5.1 Hz, 1H), 4.17 (dd, *J* = 13.5, 5.2 Hz, 1H), 2.63 (dt, *J* = 12.8, 3.4 Hz, 1H), 2.09 (ddd, *J* = 13.7, 10.7, 6.0 Hz, 1H), 2.03 (dd, *J* = 17.0, 4.8 Hz, 1H), 1.92 (appar. d, *J* = 17.1 Hz, 1H), 1.81 (td, *J* = 13.4, 3.6 Hz, 1H), 1.76-1.67 (m, 1H), 1.73 (bs, 3H), 1.66-1.55 (m, 3H), 1.21-1.12 (m, 2H), 1.15 (s, 3H), 0.98-0.90 (m, 1H), 0.94 (s, 3H), 0.85 (s, 9H), 0.07 (s, 6H) ppm; <sup>13</sup>C NMR (150 MHz, CDCl<sub>3</sub>)  $\delta$  144.3, 140.5, 134.2, 121.5, 117.0, 105.6, 77.3, 73.0, 56.4, 45.4, 43.8, 42.7, 40.6, 38.9, 34.1, 26.0, 22.5, 21.4, 21.3, 18.8, 18.2, -1.7, -1.8 ppm; [ $\alpha$ ]<sub>D</sub><sup>22.4</sup> = +192.6 (c 1.00, CHCl<sub>3</sub>); FTIR (film)  $\nu_{\text{max}}$  2954, 2930, 2856, 2827, 1639 cm<sup>-1</sup>; HRMS (CI) calculated for C<sub>26</sub>H<sub>44</sub>O<sub>2</sub>Si [M]<sup>+</sup> 416.3111 found 416.3091.

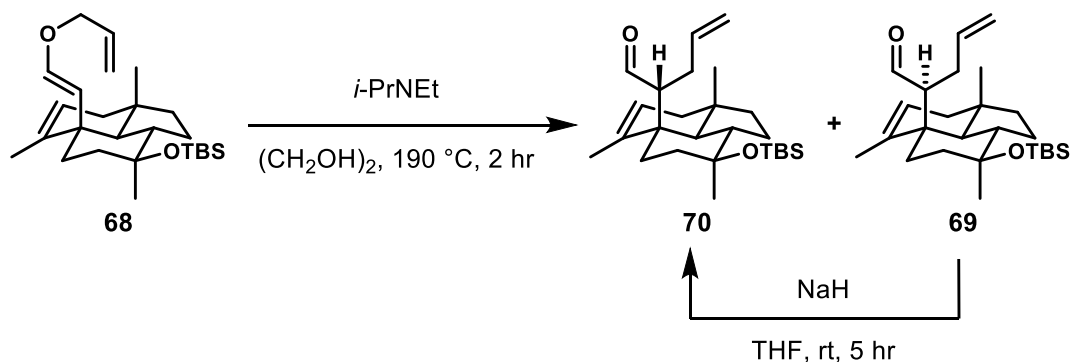

To a 250 mL round bottom flask equipped with a stir bar was added **E-alkenyl ether 68** (681 mg, 1.63 mmol) and ethylene glycol (33 mL). The mixture was sparged with argon under sonication for 30 minutes, then degassed *i*-Pr<sub>2</sub>NEt (854  $\mu$ L, 4.90 mmol) was added. The reaction mixture was heated to 190 °C *via* oil bath and allowed to stir at 190 °C for 2 hours. Upon consumption of starting material

as indicated by TLC analysis, the reaction mixture was allowed to cool to room temperature, diluted with brine (150 mL), and partitioned. The aqueous layer was extracted with hexanes (4 x 300 mL). The organic extracts were dried over MgSO<sub>4</sub>, filtered, and concentrated *in vacuo*. The crude product was purified by column chromatography (SiO<sub>2</sub>, 10% CH<sub>2</sub>Cl<sub>2</sub> in hexanes) affording **R-allyl aldehyde 70** (239 mg, 26%) and **S-allyl aldehyde 69** (473 mg, 69%) as colorless oils.

**S-allyl aldehyde 69** can be epimerized according to the following protocol:

To a 1-dram vial equipped with a stir bar was added NaH (60% dispersion in mineral oil, 10 mg, 0.25 mmol). The solids were slurried in hexanes (1 mL) then allowed to settle to the bottom of the vessel and the supernatant was removed *via* syringe. This process was repeated three times to ensure the removal of mineral oil from the reaction vessel. A solution of **S-allyl-aldehyde 69** (5 mg, 0.0120 mmol) in THF (120 μL) was added in one portion. The reaction mixture was allowed to stir at room temperature for 5 hours. Upon consumption of starting material as indicated by TLC analysis, the reaction mixture was cooled to -50 °C *via* MeCN/Me<sub>2</sub>CO/CO<sub>2(s)</sub> bath and quenched by dropwise addition of MeOH (30 μL). The quenched reaction mixture was allowed to warm to room temperature, diluted with water (0.5 mL), and extracted with Et<sub>2</sub>O (3 x 2 mL). The organic extracts were purified via column chromatography (SiO<sub>2</sub>, 10% CH<sub>2</sub>Cl<sub>2</sub> in hexanes) to afford **R-allyl aldehyde 70** (2.1 mg, 43%) and **S-allyl aldehyde 69** (0.7 mg, 13%) as colorless oils.

#### **R-allyl-aldehyde 70**

<sup>1</sup>H NMR (600 MHz, CDCl<sub>3</sub>) δ 9.73 (d, *J* = 5.4 Hz, 1H), 5.58 (dddd, *J* = 17.6, 9.8, 7.6, 5.9 Hz, 1H), 5.43 (ddq, *J* = 4.1, 2.8, 1.1 Hz, 1H), 4.98 (d, 5.9 Hz, 1H), 4.96 (s, 1H), 2.69 (ddd, *J* = 11.3, 5.9, 1.1 Hz, 1H), 2.60 (ddd, *J* = 15.8, 5.9, 1.1 Hz, 1H), 2.28 (ddd, *J* = 15.8, 11.3, 7.6 Hz, 1H), 2.16-2.09 (m, 2H), 2.06 (dt, *J* = 18.9, 2.0 Hz, 1H), 1.96 (dt, *J* = 14.5, 3.5 Hz, 1H), 1.81-1.72 (m, 1H), 1.75, (s, 3H), 1.68 (dd, *J* = 10.0, 5.1 Hz, 1H), 1.66-1.62 (m, 1H), 1.61-1.56 (m, 2H), 1.52 (dt, *J* = 13.6, 3.5 Hz, 1H), 1.35 (d, *J* = 13.6 Hz, 1H), 1.17 (s, 3H), 1.16-1.09 (m, 2H), 0.92 (s, 3H), 0.85 (s, 9H), 0.09 (s, 3H), 0.08 (s, 3H) ppm; <sup>13</sup>C NMR (150 MHz, CDCl<sub>3</sub>) δ 203.3, 138.0, 135.8, 126.0, 116.8, 76.7, 57.9, 51.0, 44.7, 44.1, 43.5, 41.6, 39.1, 37.8, 33.4, 32.8, 25.9, 22.4, 21.7, 21.1, 20.5, 18.2, -1.7, -1.8 ppm; [α]<sub>D</sub><sup>22.4</sup> = +61.0 (c 1.48, CH<sub>2</sub>Cl<sub>2</sub>); FTIR (film) ν<sub>max</sub> 2953, 2927, 2876, 2856, 2707, 1723, 1641 cm<sup>-1</sup> HRMS (ESI) calculated for C<sub>26</sub>H<sub>44</sub>O<sub>2</sub>Si [M+Na]<sup>+</sup> 439.3008 found 439.2994.

#### **S-allyl-aldehyde 69**

<sup>1</sup>H NMR (500 MHz, CDCl<sub>3</sub>) δ 9.50 (d, *J* = 4.8 Hz, 1H), 5.65 (dddd, *J* = 17.9, 10.8, 8.8, 7.0 Hz, 1H), 5.48 (ddq, *J* = 4.2, 2.8, 1.3 Hz, 1H), 5.03 (s, 1H), 5.00 (dq, *J* = 7.0, 1.3 Hz, 1H), 2.63 (ddd, *J* = 11.6, 4.7, 3.1 Hz, 1H), 2.58 (ddq, *J* = 14.3, 6.5, 1.3 Hz, 1H), 2.33 (ddd, *J* = 14.3, 11.6, 7.0 Hz, 1H), 2.18-2.09 (m, 2H), 2.05 (ddq, *J* = 18.0, 4.2, 1.3 Hz, 1H), 1.99 (dquin, *J* = 18.0, 2.3 Hz, 1H), 1.77 (q, *J* = 1.3 Hz, 3H), 1.75-1.54 (m, 6H), 1.43 (d, *J* = 13.8 Hz, 1H), 1.20 (s, 3H), 1.16 (q, *J* = 11.0 Hz, 1H), 1.06 (td, *J* = 14.2, 3.7 Hz, 1H), 0.85 (s, 9H), 0.81 (s, 3H), 0.08 (s, 3H), 0.07 (s, 3H) ppm; <sup>13</sup>C NMR (125 MHz, CDCl<sub>3</sub>) δ 204.3, 137.5, 136.0, 126.1, 117.0, 76.8, 57.5, 51.2, 44.6, 44.2, 41.83, 41.76, 40.3, 37.8, 34.5, 32.5, 25.9, 22.54, 22.53, 21.1, 20.6, 18.2, -1.67, -1.72 ppm; [α]<sub>D</sub><sup>22.5</sup> = +125.2 (c 1.80, CH<sub>2</sub>Cl<sub>2</sub>); FTIR (film) ν<sub>max</sub> 2953, 2928, 2882, 1717, 1640 cm<sup>-1</sup>; HRMS (CI) calculated for C<sub>26</sub>H<sub>44</sub>O<sub>2</sub>Si [M+H]<sup>+</sup> 417.3189 found 417.3191.

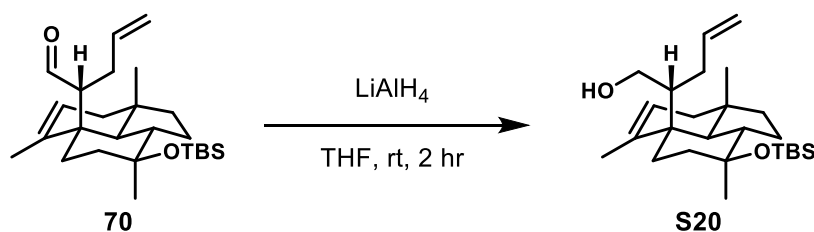

To a 25 mL round bottom flask equipped with a stir bar was added a solution of **R-allyl-aldehyde 70** (356 mg, 0.856 mmol) in THF (7.6 mL). The vessel was cooled to 0 °C *via* ice bath. LiAlH<sub>4</sub> (145 mg, 3.83 mmol) was added portionwise at 0 °C. The reaction mixture was allowed to warm to room temperature and stir for 2 hours. Upon consumption of starting material as indicated by TLC analysis, the reaction mixture was cooled to 0 °C *via* ice bath and quenched with saturated Rochelle's salt (20 mL). Et<sub>2</sub>O (20 mL) was added and the resulting mixture was stirred vigorously for 1 hour, then partitioned. The aqueous layer was extracted with Et<sub>2</sub>O (2 x 20 mL). The organic extracts were dried over MgSO<sub>4</sub>, filtered, and concentrated *in vacuo* to afford crude **alcohol S20** which was used without further purification.

### alcohol **S20**

$^1\text{H NMR}$  (500 MHz,  $\text{CDCl}_3$ )  $\delta$  5.81 (dtd,  $J = 17.0, 9.7, 4.3$  Hz, 1H), 5.28 (bs, 1H), 5.09 (d,  $J = 17.1$  Hz, 1H), 5.00 (d,  $J = 10.2$  Hz, 1H), 3.93-3.81 (m, 2H), 2.61 (d,  $J = 15.3$  Hz, 1H), 2.18-1.98 (m, 5H), 1.93-1.87 (m, 1H), 1.80-1.61 (m, 8H), 1.56 (dd,  $J = 11.5, 8.0$  Hz, 1H), 1.40 (d,  $J = 13.7$  Hz, 1H), 1.18 (s, 3H), 1.16-1.00 (m, 2H), 0.96 (s, 3H), 0.85 (s, 9H), 0.07 (s, 3H), 0.06 (s, 3H) ppm;  $^{13}\text{C NMR}$  (125 MHz,  $\text{CDCl}_3$ )  $\delta$  140.8, 140.2, 124.5, 115.7, 77.1, 63.7, 57.9, 45.0, 44.7, 43.1, 41.9, 41.4, 38.1, 37.8, 35.9, 33.9, 26.0, 22.8, 21.8, 20.8, 20.4, 18.2, -1.67, -1.70 ppm;  $[\alpha]_{\text{D}}^{22.6} = +82.4$  (c 0.41,  $\text{CH}_2\text{Cl}_2$ ); **FTIR** (film)  $\nu_{\text{max}}$  3406 (br), 2952, 2928, 2894, 2856, 1638  $\text{cm}^{-1}$ ; **HRMS** (CI) calculated for  $\text{C}_{26}\text{H}_{46}\text{O}_2\text{Si}$   $[\text{M}+\text{H}]^+$  419.3345 found 419.3336.

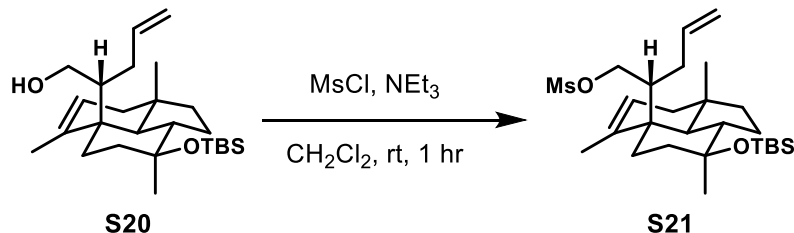

To a 25 mL round bottom flask equipped with a stir bar was added  $\text{NEt}_3$  (600  $\mu\text{L}$ , 4.29 mmol) and a solution of crude **alcohol S20** in  $\text{CH}_2\text{Cl}_2$  (8.6 mL). The mixture was cooled to 0  $^\circ\text{C}$  *via* ice bath, and  $\text{MsCl}$  (166  $\mu\text{L}$ , 2.14 mmol) was added dropwise. The reaction mixture was allowed to warm to room temperature and stir for 1 hour. Upon consumption of starting material as indicated by TLC analysis, the reaction mixture was cooled to 0  $^\circ\text{C}$  *via* ice bath and quenched with saturated  $\text{NaHCO}_3(\text{aq})$  (10 mL). The resulting mixture was allowed to warm to room temperature and partitioned. The aqueous layer was extracted with  $\text{CH}_2\text{Cl}_2$  (2 x 10 mL). The organic extracts were dried over  $\text{MgSO}_4$ , filtered, and concentrated *in vacuo*. The crude product was purified by column chromatography ( $\text{SiO}_2$ , 5%  $\text{Et}_2\text{O}$  in hexanes) affording **mesylate S21** (420 mg, 99% over two steps) as a colorless oil.

### mesylate **S21**

$^1\text{H NMR}$  (500 MHz,  $\text{CDCl}_3$ )  $\delta$  5.71 (dddd,  $J = 17.4, 10.7, 8.5, 4.2$  Hz, 1H), 5.33 (s, 1H), 5.09 (d,  $J = 10.7$ , 1H), 5.07 (quin,  $J = 1.7$  Hz, 1H), 4.47 (dt,  $J = 10.7, 1.7$  Hz, 1H), 4.39 (dd,  $J = 10.1, 2.9$  Hz, 1H), 3.00 (s, 3H), 2.6 (d,  $J = 14.8$  Hz, 1H), 2.13-2.02 (m, 5H), 1.96 (ddd,  $J = 14.0, 10.1, 4.6$  Hz, 1H), 1.77 (dt,  $J = 13.6, 3.5$  Hz, 1H), 1.79-1.71 (m, 1H), 1.68 (s, 3H), 1.69-1.63 (m, 1H), 1.61-1.52 (m, 3H), 1.44 (d,  $J = 13.6$  Hz, 1H), 1.19 (s, 3H), 1.19-1.09 (m, 2H), 0.97 (s, 3H), 0.85 (s, 9H), 0.08 (s, 3H), 0.07 (s, 3H) ppm;  $^{13}\text{C NMR}$  (125 MHz,  $\text{CDCl}_3$ )  $\delta$  139.7, 137.8, 125.5, 117.3, 76.9, 69.5, 57.7, 44.9, 44.8, 42.7, 41.8, 41.2, 37.8, 37.4, 36.1, 34.5, 33.8, 26.0, 22.8, 21.7, 20.6, 20.2, 18.2, -1.6 ppm;  $[\alpha]_{\text{D}}^{22.6} = +65.5$  (c 1.04,  $\text{CH}_2\text{Cl}_2$ ); **FTIR** (film)  $\nu_{\text{max}}$  2952, 2923, 2892, 2856, 1639  $\text{cm}^{-1}$ ; **HRMS** (ESI) calculated for  $\text{C}_{27}\text{H}_{48}\text{O}_4\text{SSi}$   $[\text{M}+\text{Na}]^+$  519.2940 found 519.2948.

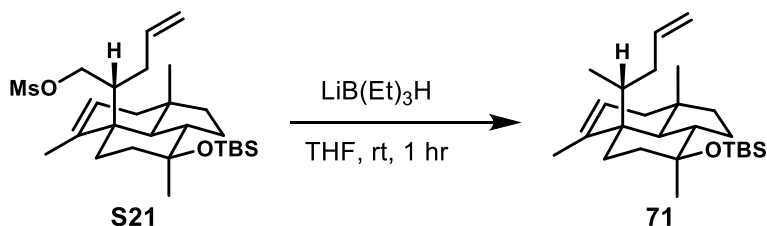

To a 50 mL round bottom flask equipped with a stir bar was added **mesylate S21** (394 mg, 0.794 mmol) and  $\text{LiB(Et)}_3\text{H}$  (1.0 M in THF, 15.9 mL, 15.9 mmol). The reaction mixture was allowed to stir at room temperature for 1 hour. Upon consumption of starting material as indicated by TLC analysis, the reaction mixture was cooled to 0  $^\circ\text{C}$  *via* ice bath and quenched by dropwise addition of methanol (0.5 mL). The mixture was allowed to warm to room temperature, diluted with water (20 mL) and hexanes (20 mL), and partitioned. The aqueous layer was extracted with hexanes (2 x 20 mL). The organic extracts were dried over  $\text{MgSO}_4$ , filtered, and concentrated *in vacuo*. The crude product was purified by column chromatography ( $\text{SiO}_2$ , hexanes) affording **diene 71** (275 mg, 86%) as a colorless oil.

### diene 71

$^1\text{H NMR}$  (500 MHz,  $\text{CDCl}_3$ )  $\delta$  5.74 (dtd,  $J = 18.2, 8.9, 4.5$  Hz, 1H), 5.26 (dtd,  $J = 4.5, 2.8, 1.5$  Hz, 1H), 4.99 (d,  $J = 5.2$  Hz, 1H), 4.97 (s, 1H), 2.69 (dd,  $J = 15.0, 3.7$  Hz, 1H), 2.12-2.03 (m, 4H), 1.84-1.51 (m, 10H), 1.39 (d,  $J = 13.6$  Hz, 1H), 1.19 (s, 3H), 1.09 (d,  $J = 7.0$  Hz, 3H), 1.03-0.97 (m, 1H), 0.96 (s, 3H), 0.86 (s, 9H), 0.08 (s, 3H), 0.07 (s, 3H) ppm;  $^{13}\text{C NMR}$  (125 MHz,  $\text{CDCl}_3$ )  $\delta$  141.0, 139.8, 123.8, 115.3, 77.0, 57.8, 45.2, 44.6, 42.9, 41.5, 41.4, 41.3, 37.7, 34.2, 30.2, 26.0, 22.7, 22.0, 21.0, 20.8, 18.2, 18.1, -1.67, -1.71 ppm;  $[\alpha]_{\text{D}}^{22.6} = +87.0$  (c 1.02,  $\text{CH}_2\text{Cl}_2$ ); **FTIR** (film)  $\nu_{\text{max}}$  3076, 2955, 2928, 2895, 2856, 1639  $\text{cm}^{-1}$ ; **HRMS** (CI) calculated for  $\text{C}_{26}\text{H}_{46}\text{OSi}$   $[\text{M}]^+$  402.3318 found 402.3305.

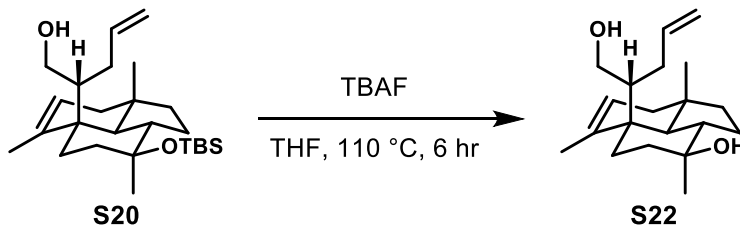

To a 5 mL microwave tube equipped with stir bar was added crude **alcohol S20** (10.0 mg, 23.9  $\mu\text{mol}$ ) and TBAF (1.0 M in THF, 1.20 mL, 1.20 mmol). The mixture was sparged with argon under sonication for 30 minutes, then subject to microwave irradiation with stirring at 110  $^{\circ}\text{C}$  for 6 hours. The mixture was allowed to cool to room temperature, diluted with saturated  $\text{NH}_4\text{Cl}_{(\text{aq})}$  (3 mL), and extracted with  $\text{Et}_2\text{O}$  (3 x 3 mL). The organic extracts were washed with brine (1 x 3 mL), dried over  $\text{MgSO}_4$ , filtered, and concentrated *in vacuo*. The crude product was purified by column chromatography ( $\text{SiO}_2$ , 30% to 50%  $\text{EtOAc}$  in hexanes, stepped gradient) affording **diol S22** (5.2 mg, 85%) as a white solid. **Diol S22** was dissolved in a mixture of  $\text{Et}_2\text{O}$  and hexanes, then crystallized by slow evaporation to afford X-ray quality crystals.

### diol S22

$^1\text{H NMR}$  (500 MHz,  $\text{CDCl}_3$ )  $\delta$  5.79 (dtd,  $J = 17.4, 9.9, 4.3$  Hz, 1H), 5.32-5.29 (m, 1H), 5.09 (dt,  $J = 17.4, 1.8$  Hz, 1H), 5.01 (dt,  $J = 9.9, 1.8$  Hz, 1H), 3.89 (dd,  $J = 11.4, 4.5$  Hz, 1H), 3.86 (dd,  $J = 11.4, 4.5$  Hz, 1H), 2.62 (d,  $J = 15.9$  Hz, 1H), 2.18-2.08 (m, 4H), 2.05 (ddd,  $J = 15.3, 10.8, 4.8$  Hz, 1H), 1.94-1.89 (m, 1H), 1.84-1.65 (m, 7H), 1.62 (dd,  $J = 11.6, 8.1$  Hz, 1H), 1.44 (d,  $J = 13.5$  Hz, 1H), 1.22 (s, 3H), 1.16 (q,  $J = 10.7$  Hz, 1H), 1.10 (td,  $J = 14.0, 4.8$  Hz, 1H), 0.98 (s, 3H) ppm;  $^{13}\text{C NMR}$  (125 MHz,  $\text{CDCl}_3$ )  $\delta$  140.6, 140.1, 124.5, 115.8, 74.5, 63.9, 58.4, 45.1, 44.1, 43.1, 41.5, 41.2, 38.0, 37.8, 35.9, 33.9, 22.2, 21.8, 20.5, 20.3 ppm;  $[\alpha]_{\text{D}}^{22.7} = +96.6$  (c 0.50,  $\text{CH}_2\text{Cl}_2$ ); **FTIR** (film)  $\nu_{\text{max}}$  3362 (br), 3072, 2945, 2873, 2829, 1647  $\text{cm}^{-1}$ ; **m.p.** = 149  $^{\circ}\text{C}$ ; **HRMS** (ESI) calculated for  $\text{C}_{20}\text{H}_{32}\text{O}_2$   $[\text{M}+\text{Na}]^+$  327.2300 found 327.2290.

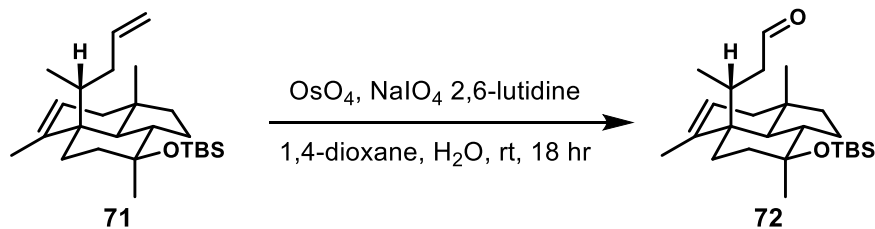

To a 1-dram vial equipped with a stir bar was added a 3:1 mixture of 1,4-dioxane/water (2.0 mL), **diene 71** (43.1 mg, 0.107 mmol),  $\text{NaIO}_4$  (69 mg, 0.324 mmol), 2,6-lutidine (87  $\mu\text{L}$ , 0.751 mmol), and  $\text{OsO}_4$  (2.5 wt% in *t*-BuOH, 110  $\mu\text{L}$ , 8.56  $\mu\text{mol}$ ). The reaction mixture was allowed to stir at room temperature for 18 hours. Upon consumption of starting material as indicated by TLC analysis, the reaction mixture was cooled to 0  $^{\circ}\text{C}$  *via* ice bath and quenched with saturated  $\text{Na}_2\text{S}_2\text{O}_3_{(\text{aq})}$  (10 mL). The mixture was allowed to warm to room temperature and extracted with pentane (3 x 20 mL). The organic extracts were washed with brine (1 x 20 mL), dried over  $\text{MgSO}_4$ , filtered, and concentrated *in vacuo*. The crude product was purified by column chromatography ( $\text{SiO}_2$ , 3%  $\text{EtOAc}$  in hexanes) affording **aldehyde 72** (42 mg, 97%) as a colorless oil.

### aldehyde 72

$^1\text{H NMR}$  (600 MHz,  $\text{CDCl}_3$ )  $\delta$  9.72 (d,  $J = 2.3$  Hz, 1H), 5.29 (bs, 1H), 3.10 (d,  $J = 18.4$  Hz, 1H), 2.66-2.49 (m, 1H), 2.23-2.09 (m, 2H), 2.07 (bs, 3H), 1.78 – 1.69 (m, 1H), 1.69-1.62 (m, 3H), 1.64 (s, 3H), 1.56 (dd,  $J = 11.5, 8.3$  Hz, 1H), 1.40 (d,  $J = 13.6$  Hz, 1H), 1.18 (s, 3H), 1.15-1.08 (m, 1H), 1.10 (d,  $J = 7.0$  Hz, 3H), 1.07-0.98 (m, 1H), 0.86 (s, 9H), 0.86 (s, 3H), 0.09 (s, 3H), 0.08 (s, 3H) ppm;  $^{13}\text{C NMR}$  (150 MHz,  $\text{CDCl}_3$ )  $\delta$  203.4, 140.9, 124.3, 76.8, 57.4, 52.3, 45.1, 44.5, 42.5, 41.5, 41.4, 37.6, 33.8, 26.0, 24.3, 22.6, 22.4, 20.8, 20.6, 20.3, 18.2, – 1.68, –1.69 ppm;  $[\alpha]_{\text{D}}^{22.4} = +66.5$  (c 1.0,  $\text{CHCl}_3$ ); **FTIR** (film)  $\nu_{\text{max}}$  2953, 2857, 1725, 1462, 1379, 1254, 1148, 1116, 1053, 1033  $\text{cm}^{-1}$ ; **HRMS** (CI) calculated for  $\text{C}_{25}\text{H}_{44}\text{O}_2\text{Si}$   $[\text{M}-(t\text{-Bu})]^+$  347.2406 found 347.2398.

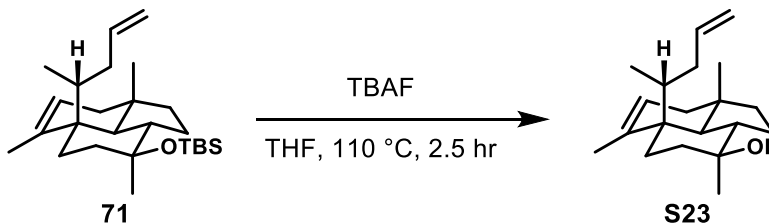

To a 5 mL microwave tube equipped with a stir bar was added a solution of **diene 71** (50 mg, 0.124 mmol) in THF (400  $\mu\text{L}$ ), and TBAF (1.0 M in THF, 4.00 mL, 4.00 mmol). The mixture was sparged with argon under sonication for 30 minutes, then subject to microwave irradiation with stirring at 110  $^{\circ}\text{C}$  for 2.5 hours. The mixture was allowed to cool to room temperature, diluted with saturated  $\text{NH}_4\text{Cl}_{(\text{aq})}$  (20 mL), and extracted with  $\text{Et}_2\text{O}$  (3 x 40 mL). The organic extracts were washed with brine (1 x 40 mL), dried over  $\text{MgSO}_4$ , filtered, and concentrated *in vacuo*. The crude product was purified by column chromatography ( $\text{SiO}_2$ , 6%  $\text{EtOAc}$  in hexanes) affording **alcohol S23** (31 mg, 92%) as a colorless oil.

### alcohol S23

$^1\text{H NMR}$  (500 MHz,  $\text{CDCl}_3$ )  $\delta$  5.76 – 5.63 (m, 1H), 5.27 (dd,  $J = 4.9, 3.5$  Hz, 1H), 5.00-4.97 (m, 1H), 4.97-4.93 (m, 1H), 2.67 (dd,  $J = 15.1, 2.1$  Hz, 1H), 2.14 (dt,  $J = 13.9, 3.3$  Hz, 1H), 2.12-2.01 (m, 3H), 1.86-1.72 (m, 2H), 1.72-1.52 (m, 8H), 1.43 (s, 1H), 1.40 (bs, 1H), 1.21 (s, 3H), 1.14 (q,  $J = 10.5$  Hz, 1H), 1.08 (d,  $J = 6.9$  Hz, 3H), 1.03 (td,  $J = 13.4, 4.2$  Hz, 1H), 0.97 (s, 3H) ppm;  $^{13}\text{C NMR}$  (125 MHz,  $\text{CDCl}_3$ )  $\delta$  140.8, 139.6, 115.4, 74.4, 58.2, 45.2, 44.0, 42.9, 41.23, 41.15, 41.15, 37.6, 34.3, 30.1, 22.1, 21.9, 20.8, 20.6, 18.1 ppm;  $[\alpha]_{\text{D}}^{22.4} = +67.2$  (c 1.00,  $\text{CHCl}_3$ ); **FTIR** (film)  $\nu_{\text{max}}$  3348 (br), 3074, 2957, 2938, 2874, 2828, 1639  $\text{cm}^{-1}$ ; **HRMS** (CI) calculated for  $\text{C}_{20}\text{H}_{32}\text{O}$   $[\text{M}]^+$  288.2453 found 288.2459.

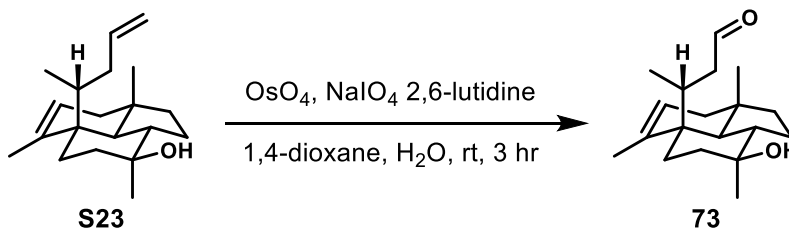

To a 25 mL round bottom flask equipped with a stir bar was added a 3:1 mixture of 1,4-dioxane/water (2.2 mL), **alcohol S23** (31 mg, 0.108 mmol),  $\text{NaIO}_4$  (69 mg, 0.324 mmol), 2,6-lutidine (88  $\mu\text{L}$ , 0.756 mmol), and  $\text{OsO}_4$  (2.5 wgt% in  $t\text{-BuOH}$ , 111  $\mu\text{L}$ , 8.64  $\mu\text{mol}$ ). The reaction mixture was allowed to stir at room temperature for 3 hours. Upon consumption of starting material as indicated by TLC analysis, the reaction mixture was cooled to 0  $^{\circ}\text{C}$  *via* ice bath and quenched with saturated  $\text{Na}_2\text{S}_2\text{O}_3_{(\text{aq})}$  (10 mL). The mixture was allowed to warm to room temperature and extracted with pentane (3 x 20 mL). The organic extracts were washed with brine (1 x 20 mL), dried over  $\text{MgSO}_4$ , filtered, and concentrated *in vacuo*. The crude product was purified by column chromatography ( $\text{SiO}_2$ , 15%  $\text{EtOAc}$  in hexanes) affording **aldehyde 73** (28 mg, 89%) as a colorless oil.

### aldehyde 73

$^1\text{H NMR}$  (600 MHz,  $\text{CDCl}_3$ )  $\delta$  9.71 (d,  $J = 2.3$  Hz, 1H), 5.31 (appar. d,  $J = 1.3$  Hz, 1H), 3.11 (d,  $J = 18.6$  Hz, 1H), 2.60 (tt,  $J = 14.0, 7.0$  Hz, 1H), 2.19 (ddd,  $J = 18.7, 10.3, 2.4$  Hz, 1H), 2.16-2.07 (m, 4H), 1.79 (dtd,  $J = 14.0, 10.9, 8.2$  Hz, 1H), 1.74-1.67 (m, 2H), 1.67-1.59 (m, 5H),

1.43 (d,  $J = 13.6$  Hz, 1H), 1.21 (s, 3H), 1.16 (q,  $J = 10.8$  Hz, 1H), 1.10 (d,  $J = 7.1$  Hz, 3H), 1.07 (td,  $J = 14.0, 3.8$  Hz), 0.85 (s, 3H) ppm;  $^{13}\text{C}$  NMR (150 MHz,  $\text{CDCl}_3$ )  $\delta$  203.2, 140.7, 124.3, 74.3, 58.0, 52.3, 45.1, 44.0, 42.5, 41.3, 41.1, 37.5, 33.9, 24.2, 22.3, 22.0, 20.6, 20.43, 20.40 ppm;  $[\alpha]_{\text{D}}^{22.4} = +84.4$  (c 1.00,  $\text{CHCl}_3$ ); FTIR (film)  $\nu_{\text{max}}$  3388 (br), 2938, 2876, 2827, 2711, 1722  $\text{cm}^{-1}$ ; HRMS (CI) calculated for  $\text{C}_{19}\text{H}_{30}\text{O}_2$   $[\text{M}]^+$  290.2246 found 290.2244.

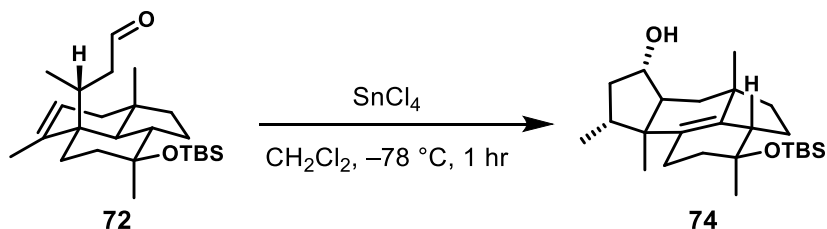

To a 1-dram vial equipped with stir bar was added **aldehyde 72** (3.6 mg, 8.9  $\mu\text{mol}$ ) and  $\text{CH}_2\text{Cl}_2$  (100  $\mu\text{L}$ ). The reaction vessel was cooled to  $-78\text{ }^\circ\text{C}$  *via*  $\text{Me}_2\text{CO}/\text{CO}_2(\text{s})$  bath.  $\text{SnCl}_4$  (1 M in hexane) (2.2  $\mu\text{L}$ , 2.2  $\mu\text{mol}$ ) was added to the reaction vessel. The reaction mixture was allowed to stir at  $-78\text{ }^\circ\text{C}$  for 1 hour. Upon consumption of starting material as indicated by TLC analysis, the reaction mixture was quenched at  $-78\text{ }^\circ\text{C}$  with saturated  $\text{NaHCO}_3(\text{aq})$  (1 mL). The mixture was allowed to warm to room temperature and extracted with  $\text{Et}_2\text{O}$  (3x2 mL). The organic extracts were dried over  $\text{Na}_2\text{SO}_4$ , filtered, and concentrated *in vacuo*. Analysis of the crude reaction mixture revealed the presence of rearranged **tetrasubstituted alkene 74**.

#### tetrasubstituted alkene 74

$^1\text{H}$  NMR (500 MHz,  $\text{CDCl}_3$ )  $\delta$  4.16 (td,  $J = 9.9, 5.6$  Hz, 1 H), 2.60 (d,  $J = 11.0$  Hz, 1H), 2.16-1.99 (m, 3H), 1.96 (appar. d,  $J = 14.1$  Hz, 1H), 1.89-1.74 (m, 2H), 1.74-1.57 (m, 5H), 1.42 (dd,  $J = 14.2, 5.0$  Hz, 1H), 1.20 (appar. q,  $J = 10.8$  Hz, 1H), 1.08 (s, 3H), 1.04 (d,  $J = 7.3$  Hz, 3H), 1.01-0.97 (m, 1H), 0.96 (s, 3H), 0.94 (s, 3H), 0.85 (s, 9H), 0.07 (s, 3H), 0.06 (s, 3H) ppm;  $^{13}\text{C}$  NMR (125 MHz,  $\text{CDCl}_3$ )  $\delta$  138.5, 131.0, 88.6, 74.9, 73.4, 56.2, 48.5, 43.8, 43.6, 42.9, 40.6, 39.0, 38.2, 33.8, 25.9, 24.2, 22.4, 22.3, 20.0, 18.3, 17.6,  $-1.7, -1.8$  ppm.

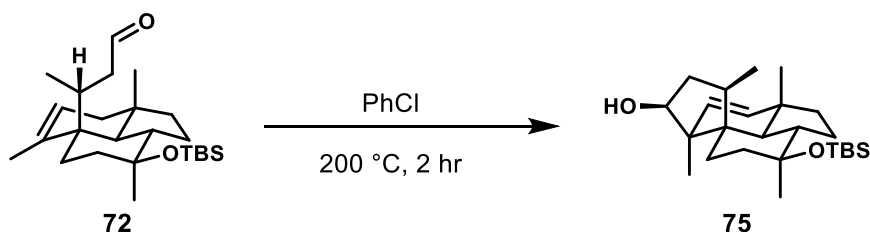

To a 10 mL microwave vial equipped with a stir bar was added **aldehyde 72** (2.9 mg, 7.4  $\mu\text{mol}$ ) and  $\text{PhCl}$  (1 mL). The reaction vessel was sealed and subject to microwave irradiation at  $200\text{ }^\circ\text{C}$  with stirring for 2 hours. The reaction vessel was then allowed to cool to room temperature, and the reaction mixture was concentrated *in vacuo*. Analysis of the crude residue revealed the presence of **carbonyl ene product 75**.

#### carbonyl ene product 75

$^1\text{H}$  NMR (500 MHz,  $\text{CDCl}_3$ )  $\delta$  6.06 (d,  $J = 10.1$  Hz, 1H), 5.28 (d,  $J = 10.2$  Hz, 1H), 3.78 (d,  $J = 10.4, 5.7$  Hz, 1H), 2.27 (quin.d,  $J = 7.2, 2.0$  Hz, 1H), 2.20-2.10 (m, 1H), 2.10-2.03 (m, 1H), 1.97 (ddd,  $J = 14.3, 10.3, 6.2$  Hz, 1H), 1.84-1.72 (m, 3H), 1.70-1.60 (m, 4 H), 1.36 (dd,  $J = 11.3, 8.8$  Hz, 1H), 1.17 (s, 3H), 1.08 (d,  $J = 6.8$  Hz, 3H), 1.03 (s, 3H), 0.98 (s, 3H), 0.85 (s, 9H), 0.08-0.05 (m, 6H) ppm;  $^{13}\text{C}$  NMR (125 MHz,  $\text{CDCl}_3$ )  $\delta$  138.7, 131.2, 79.3, 76.4, 52.5, 51.8, 45.3, 44.2, 42.4, 42.2, 41.1, 39.6, 30.4, 29.6, 26.0, 22.3, 21.2, 20.8, 20.3, 19.7, 18.3,  $-1.6, -1.7$  ppm.

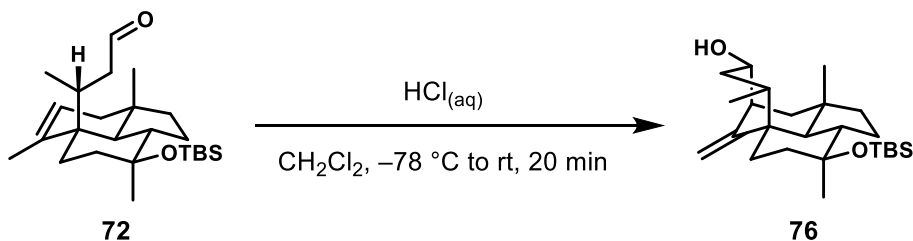

To a 1-dram vial equipped with a stir bar was added **aldehyde 72** (2.9 mg, 7.2  $\mu\text{mol}$ ) and  $\text{CH}_2\text{Cl}_2$  (400  $\mu\text{L}$ ). The reaction vessel was cooled to  $-78\text{ }^\circ\text{C}$  *via*  $\text{Me}_2\text{CO}/\text{CO}_2(\text{s})$  bath. Concentrated  $\text{HCl}_{(\text{aq})}$  (10  $\mu\text{L}$ ) was added to the reaction vessel. The cooling bath was removed, and the reaction mixture was allowed to warm to room temperature, stirring for 20 minutes. Upon consumption of starting material as indicated by TLC analysis, the reaction mixture was cooled to  $-78\text{ }^\circ\text{C}$  and quenched with saturated  $\text{NaHCO}_3(\text{aq})$  (1 mL). The mixture was allowed to warm to room temperature and extracted with  $\text{CH}_2\text{Cl}_2$  (3x2 mL). The organic extracts were dried over  $\text{Na}_2\text{SO}_4$ , filtered, and concentrated *in vacuo*. NMR spectra of the crude product are consistent with the presence of small quantities of expected **Prins product 76**.

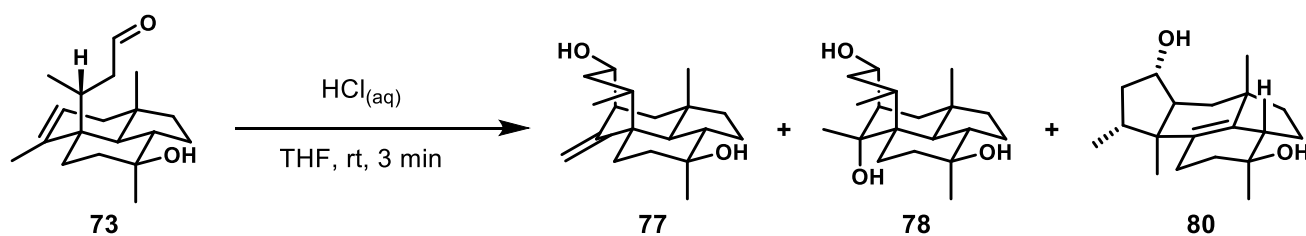

To a 2-dram vial equipped with a stir bar was added **aldehyde 73** (9 mg, 31  $\mu\text{mol}$ ), THF (900  $\mu\text{L}$ ), and concentrated  $\text{HCl}_{(\text{aq})}$  (900  $\mu\text{L}$ ). The reaction mixture was allowed to stir vigorously at room temperature for 3 minutes. Upon consumption of starting material as indicated by TLC analysis, the reaction was quenched by addition of saturated  $\text{NaHCO}_3(\text{aq})$  (1.5 mL) followed by  $\text{NaHCO}_3(\text{s})$  until the evolution of gas subsided. The mixture was extracted with  $\text{Et}_2\text{O}$  (3x3 mL). The organic extracts were dried over  $\text{MgSO}_4$ , filtered, and concentrated *in vacuo*. The crude product was purified by column chromatography ( $\text{SiO}_2$ , 15% to 20%  $\text{EtOAc}$  in hexanes, stepped gradient;  $\text{SiO}_2$ , 15%  $\text{EtOAc}$  in 1:1 hexanes: $\text{CH}_2\text{Cl}_2$ ) affording **tetrasubstituted alkene 80** as a white solid, desired **diol 77** as a white solid, and **triol 78** as a white solid. Characterization data obtained for the desired **diol 77** are in good agreement with those previously reported.<sup>10</sup> **Tetrasubstituted alkene 80** was dissolved in a mixture of  $\text{MeOH}/\text{hexanes}$  then crystallized by slow evaporation to produce X-ray quality crystals.

#### **tetrasubstituted alkene 80**

$^1\text{H NMR}$  (600 MHz,  $\text{CDCl}_3$ )  $\delta$  4.16 (td,  $J = 10.0, 5.8$  Hz, 1H), 2.60 (d,  $J = 10.8$  Hz, 1H), 2.15 (ddt,  $J = 17.6, 6.7, 1.7$  Hz, 1H), 2.11-2.03 (m, 2H), 1.99 (dd,  $J = 14.1, 2.2$  Hz, 1H), 1.91-1.80 (m, 2H), 1.74-1.64 (m, 3H), 1.64-1.57 (m, 2H), 1.44 (dd,  $J = 14.1, 5.6$  Hz, 1H), 1.22-1.17 (m, 1H), 1.10 (s, 3H), 1.05 (d,  $J = 7.1$  Hz, 3H), 1.04-0.99 (m, 1H), 0.98 (s, 6H) ppm;  $^{13}\text{C NMR}$  (150 MHz,  $\text{CDCl}_3$ )  $\delta$  138.2, 131.4, 73.3, 72.3, 56.1, 47.9, 43.8, 43.6, 42.9, 40.6, 38.9, 38.1, 33.7, 25.8, 24.1, 22.4, 21.9, 19.5, 17.6 ppm; **HRMS** (CI) calculated for  $\text{C}_{19}\text{H}_{30}\text{O}_2$   $[\text{M}]^+$  290.2246 found 290.2251.

#### **diol 77**

$^1\text{H NMR}$  (500 MHz,  $\text{CDCl}_3$ )  $\delta$  4.77 (s, 1H), 4.63 (s, 1H), 4.26 (t,  $J = 7.3$  Hz, 1H), 2.35 (dd,  $J = 4.9, 2.2$  Hz, 1H), 2.23-2.11 (m, 2H), 2.04 (dd,  $J = 13.1, 2.4$  Hz, 1H), 2.00-1.93 (m, 1H), 1.93-1.87 (m, 1H), 1.86-1.78 (m, 1H), 1.72 (dt,  $J = 12.9, 3.4$  Hz, 1H), 1.63-1.59 (m, 1H), 1.54-1.39 (m, 4H), 1.33-1.27 (m, 2H), 1.19 (s, 3H), 1.03 (s, 3H), 1.01-0.96 (m, 1H), 0.94 (d,  $J = 6.2$  Hz, 3H), 0.91-0.86 (m, 2H) ppm;  $^{13}\text{C NMR}$  (125 MHz,  $\text{CDCl}_3$ )  $\delta$  154.7, 106.0, 73.9, 73.4, 59.5, 52.1, 45.8, 44.5, 43.3, 43.1, 41.5, 41.3, 39.9, 30.4, 27.8, 21.7, 20.8, 20.52, 20.46 ppm;  $[\alpha]_D^{22.4} = -3.1$  (c 1.00,  $\text{CHCl}_3$ ); **FTIR** (film)  $\nu_{\text{max}}$  3350 (br), 2926, 2852, 1640  $\text{cm}^{-1}$ ; **HRMS** (CI) calculated for  $\text{C}_{19}\text{H}_{30}\text{O}_2$   $[\text{M}]^+$  290.2246 found 290.2241.

### triol **78**

$^1\text{H NMR}$  (500 MHz,  $\text{CDCl}_3$ )  $\delta$  4.26 (dd,  $J = 9.7, 6.7$  Hz, 1H), 2.52 (dt,  $J = 16.0, 9.3$  Hz, 1H), 2.14-2.07 (m, 1H), 1.93-1.72 (m, 3H), 1.71-1.40 (m, 9H), 1.37 (s, 3H), 1.28-1.23 (m, 1H), 1.22 (s, 3H), 1.11-1.07 (m, 1H), 1.05 (d,  $J = 7.1$  Hz, 3H), 0.91 (s, 3H) ppm;  $^{13}\text{C NMR}$  (125 MHz,  $\text{CDCl}_3$ )  $\delta$  73.9, 73.8, 72.2, 52.3, 50.2, 43.4, 41.2, 41.1, 40.8, 40.7, 38.9, 27.1, 25.8, 24.8, 21.9, 21.6, 20.6, 19.8 ppm;  $[\alpha]_{\text{D}}^{22.4} = +1.8$  (c 0.50,  $\text{CHCl}_3$ ); **FTIR** (film)  $\nu_{\text{max}}$  3393 (br), 2927, 1463, 1383, 1099  $\text{cm}^{-1}$ ; **HRMS** (CI) calculated for  $\text{C}_{19}\text{H}_{32}\text{O}_3\text{Na}$   $[\text{M}+\text{Na}]^+$  331.2249 found 331.2250.

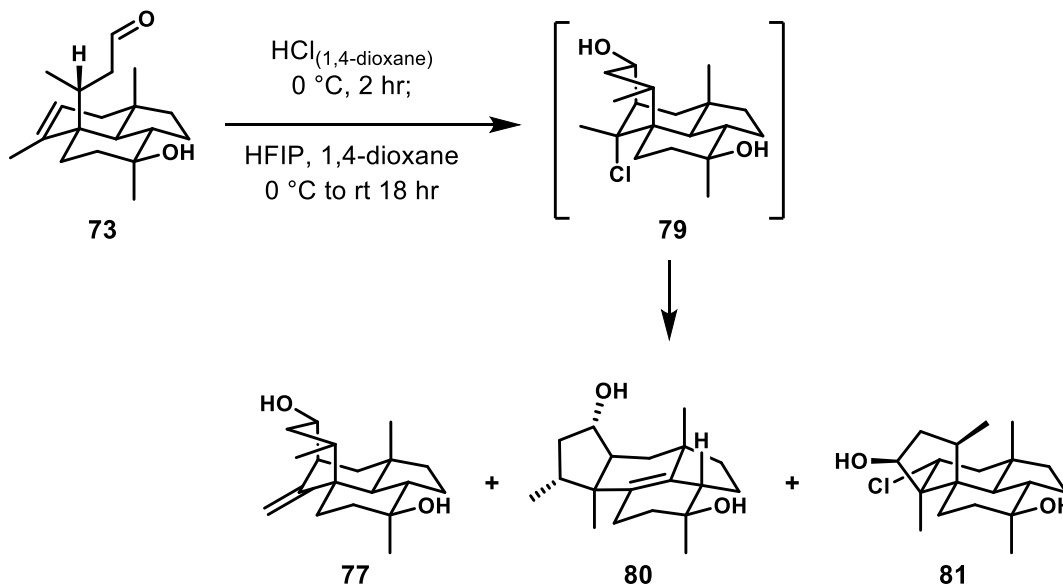

To a 2-dram vial equipped with stir bar was added **aldehyde 73** (14.6 mg, 50  $\mu\text{mol}$ ). The reaction vessel was cooled to 0 °C *via* ice bath, and HCl (4 M in 1,4-dioxane, 600  $\mu\text{L}$ , 2.4 mmol) was added. The reaction mixture was allowed to stir at 0 °C for 2 hours, then allowed to warm to room temperature and concentrated *in vacuo*. Analysis of the concentrated reaction mixture revealed the presence of **chlorinated intermediate 79**. The resulting residue was cooled to 0 °C *via* ice bath, and a 1:1 mixture of HFIP/1,4-dioxane (1.2 mL) was added streamwise down the sides of the reaction vessel. The reaction mixture was allowed to warm slowly to room temperature, stirring for 18 hours, then concentrated *in vacuo*. The crude product was purified by column chromatography ( $\text{SiO}_2$ , 8% EtOAc in 1:1 hexanes/DCM followed by 15% EtOAc in hexanes) affording **diol 77** (6.8 mg, 48%) as a white solid, **chloride 81** as a colorless oil (1.5 mg, 9%), and **tetrasubstituted alkene 80** (4.1 mg, 28%) as a white solid.

### chlorinated intermediate **79**

$^1\text{H NMR}$  (600 MHz,  $\text{CDCl}_3$ )  $\delta$  4.34 (dd,  $J = 9.8, 6.2$  Hz, 1H), 2.59 (dt,  $J = 16.1, 9.7$  Hz, 1H), 2.22-2.13 (m, 2H), 2.11-2.08 (m, 1H), 1.83 (s, 3H), 1.82-1.55 (m, 8H), 1.48-1.40 (m, 2H), 1.31 (ddd,  $J = 15.4, 9.2, 6.2$  Hz, 1H), 1.23 (s, 3H), 1.15-1.11 (m, 1H), 1.09 (d,  $J = 6.9$  Hz, 3H), 0.93 (s, 3H).  $^{13}\text{C NMR}$  (125 MHz,  $\text{CDCl}_3$ )  $\delta$  86.2, 73.9, 72.5, 54.7, 52.0, 44.2, 43.3, 42.5, 42.0, 41.0, 40.6, 38.9, 28.5, 27.8, 27.0, 22.2, 21.6, 20.6, 19.5 ppm; **HRMS** (CI) calculated for  $\text{C}_{19}\text{H}_{31}\text{ClO}_2$   $[\text{M}]^+$  326.2013 found 326.2010.

### chloride **81**

$^1\text{H NMR}$  (500 MHz,  $\text{CDCl}_3$ )  $\delta$  4.21-4.09 (m, 2H), 2.57-2.41 (m, 2H), 2.19-2.06 (m, 2H), 1.88-1.68 (m, 4H), 1.68-1.58 (m, 2H), 1.52-1.31 (m, 3H), 1.18 (m, 8H), 1.06 (s, 3H), 1.05 (s, 3H) ppm;  $^{13}\text{C NMR}$  (150 MHz,  $\text{CDCl}_3$ )  $\delta$  75.3, 74.2, 66.2, 57.5, 51.2, 49.4, 46.6, 44.5, 43.3, 42.8, 42.0, 40.8, 35.9, 27.8, 21.5, 20.8, 20.3, 19.8, 9.3 ppm; **HRMS** (CI) calculated for  $\text{C}_{29}\text{H}_{31}\text{ClO}_2$   $[\text{M}]^+$  326.2013 found 326.2020.



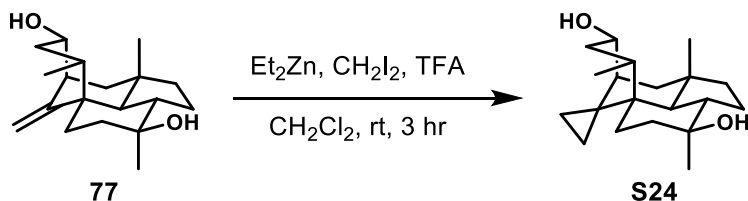

To a 2-dram vial equipped with a stir bar was added  $\text{CH}_2\text{Cl}_2$  (150  $\mu\text{L}$ ) and  $\text{Et}_2\text{Zn}$  (1.0 M in hexanes, 103  $\mu\text{L}$ , 103  $\mu\text{mol}$ ). The solution was cooled to 0  $^\circ\text{C}$  *via* ice bath. A solution of TFA (3.9  $\mu\text{L}$ , 52  $\mu\text{mol}$ ) in  $\text{CH}_2\text{Cl}_2$  (150  $\mu\text{L}$ ) was added dropwise to the reaction vessel, and the mixture was allowed to stir at 0  $^\circ\text{C}$  for 10 minutes. A solution of  $\text{CH}_2\text{I}_2$  (4.1  $\mu\text{L}$ , 52  $\mu\text{mol}$ ) in  $\text{CH}_2\text{Cl}_2$  (150  $\mu\text{L}$ ) was added dropwise to the reaction vessel, and the mixture was allowed to stir at 0  $^\circ\text{C}$  for 20 minutes. A solution of **diol 77** (3.0 mg, 103  $\mu\text{mol}$ ) was added dropwise to the reaction vessel. The reaction mixture was allowed to warm to room temperature and stir for 3 hours. Upon consumption of starting material as indicated by TLC analysis, The reaction mixture was cooled to 0  $^\circ\text{C}$  *via* ice bath, quenched with saturated  $\text{NaHCO}_3(\text{aq})$  (1 mL), allowed to warm to room temperature, and extracted with  $\text{EtOAc}$  (3 x 2 mL). The organic extracts were washed with brine (1 x 1 mL), dried over  $\text{MgSO}_4$ , filtered, and concentrated *in vacuo*. The crude product was purified by column chromatography ( $\text{SiO}_2$ , 20%  $\text{EtOAc}$  in hexanes) affording **cyclopropane S24** (2.2 mg, 70%) as a white solid. The characterization data obtained are in good agreement with those previously reported.<sup>10</sup>

#### cyclopropane S24

$^1\text{H NMR}$  (600 MHz,  $\text{CDCl}_3$ )  $\delta$  4.25 (appar t,  $J = 8.4$  Hz, 1H), 2.19 (dt,  $J = 13.8, 6.9$  Hz, 1H), 2.15-2.06 (m, 1H), 1.90-1.73 (m, 3H), 1.63-1.57 (m, 2H), 1.54-1.37 (m, 6H), 1.18 (s, 3H), 1.07-1.01 (m, 2H), 1.00 (d,  $J = 6.7$  Hz, 3H), 0.97 (s, 3H), 0.66 (td,  $J = 14.0, 3.2$  Hz, 1H), 0.64-0.60 (m, 1H), 0.56 (dt,  $J = 9.3, 4.7$  Hz, 1H), 0.38 (dt,  $J = 9.5, 4.9$  Hz, 1H), -0.16 (ddd,  $J = 9.3, 5.9, 5.0$  Hz, 1H) ppm;  $^{13}\text{C NMR}$  (150 MHz,  $\text{CDCl}_3$ )  $\delta$  73.8, 72.2, 57.5, 52.4, 44.6, 43.6, 43.5, 42.4, 41.3, 40.4, 36.4, 27.5, 26.5, 25.7, 21.5, 21.3, 20.7, 20.5, 8.2, 4.3 ppm;  $[\alpha]_{\text{D}}^{22.4} = +4.5$  (c 0.50,  $\text{CHCl}_3$ ); **FTIR** (film)  $\nu_{\text{max}}$  3347 (br), 2952, 2924  $\text{cm}^{-1}$ ; **HRMS** (CI) calculated for  $\text{C}_{20}\text{H}_{32}\text{O}_2$   $[\text{M}-\text{H}_2\text{O}]^+$  286.2297 found 286.2288.

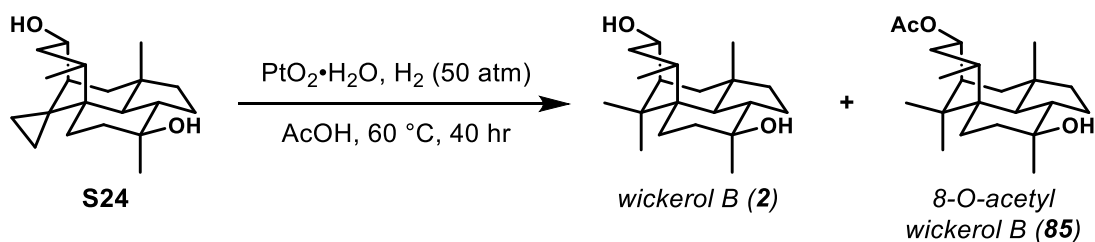

To a 2-dram vial equipped with a stir bar was added **cyclopropane S24** (2.2 mg, 7.2  $\mu\text{mol}$ ),  $\text{PtO}_2 \cdot \text{H}_2\text{O}$  (3.3 mg, 250 wgt%), and  $\text{AcOH}$  (1 mL). The reaction vessel was placed in a pressure reactor, which was then sealed, flushed with  $\text{H}_2$  three times, and pressurized to 50 atm  $\text{H}_2$ . The reactor was heated to 60  $^\circ\text{C}$  (bath temperature) *via* oil bath. The reaction mixture was allowed to stir at 60  $^\circ\text{C}$  for 40 hours, allowed to cool to room temperature, then filtered through a pad of Celite rinsing with  $\text{EtOAc}$  (5 x 2 mL). The filtrate was concentrated *in vacuo*. The crude product was purified by column chromatography ( $\text{SiO}_2$ , 50%  $\text{CHCl}_3$  in hexanes) affording **wickerol B (2)**, 1.0 mg, 45%) as a white solid, and **8-O-acetyl wickerol B (85)**, 0.4 mg, 18%) as a colorless oil. The characterization data obtained are in good agreement with those previously reported.<sup>10</sup>

#### wickerol B (2)

$^1\text{H NMR}$  (600 MHz,  $\text{CDCl}_3$ )  $\delta$  4.18 (dd,  $J = 10.0, 6.3$  Hz, 1H), 2.62 (dt,  $J = 16.1, 9.8$  Hz, 1H), 2.07-1.97 (m, 1H), 1.90-1.70 (m, 4H), 1.67-1.58 (m, 3H), 1.49-1.37 (m, 4H), 1.29 (d,  $J = 13.0$  Hz, 1H), 1.25-1.20 (m, 1H), 1.18 (s, 3H), 1.14 (s, 3H), 1.08 (d,  $J = 7.0$  Hz, 1H), 0.98 (s, 3H), 0.92 (s, 3H) ppm;  $^{13}\text{C NMR}$  (151 MHz,  $\text{CDCl}_3$ )  $\delta$  73.91, 72.8, 52.6, 52.0, 44.3, 43.6, 41.9, 41.2, 41.1, 39.4, 39.3, 39.0, 26.6, 26.2, 26.1, 25.1, 22.5, 21.6, 20.6, 19.8 ppm;  $[\alpha]_{\text{D}}^{22.0} = +17.6$  (c 0.10,  $\text{MeOH}$ ); **FTIR** (film)  $\nu_{\text{max}}$  3328 (br), 2957, 2926, 2881, 1463, 1383, 1103, 1014  $\text{cm}^{-1}$ ; **HRMS** (CI) calculated for  $\text{C}_{20}\text{H}_{34}\text{O}_2$   $[\text{M}]^+$  306.2559 found 306.2567.

### 8-O-acetyl wickerol B (85)

$^1\text{H NMR}$  (500 MHz,  $\text{CDCl}_3$ )  $\delta$  5.13 (dd,  $J = 10.2, 6.1$  Hz, 1H), 2.65 – 2.55 (m, 1H), 2.04 (d,  $J = 8.0$  Hz, 1H), 2.01 (s, 2H), 1.88 – 1.66 (m, 4H), 1.61 (dd,  $J = 13.2, 9.6$  Hz, 2H), 1.50 – 1.38 (m, 3H), 1.38 – 1.27 (m, 3H), 1.18 (s, 2H), 1.08 (d,  $J = 9.1$  Hz, 5H), 1.03 (dd,  $J = 18.7, 9.7$  Hz, 1H), 0.97 (d,  $J = 3.2$  Hz, 4H) ppm;  $^{13}\text{C NMR}$  (151 MHz,  $\text{CDCl}_3$ )  $\delta$  170.9, 76.1, 73.9, 52.0, 48.8, 44.3, 43.6, 41.0, 40.6, 39.3, 39.0, 38.9, 37.9, 26.3, 26.2, 25.8, 24.9, 22.5, 21.8, 21.6, 20.6, 19.8 ppm;  $[\alpha]_{\text{D}}^{22.4} = +20.6$  (c 0.10,  $\text{CHCl}_3$ ); **FTIR** (film)  $\nu_{\text{max}}$  2918, 2851, 1731  $\text{cm}^{-1}$ ; **HRMS** (CI) calculated for  $\text{C}_{22}\text{H}_{36}\text{O}_3$   $[\text{M}-\text{AcOH}]^+$  288.2453 found 288.2446.

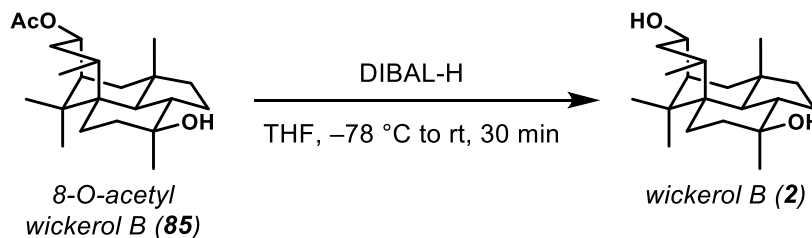

To a 1-dram vial equipped with a stir bar was added **8-O-acetyl wickerol B (85)**, 1.7 mg, 4.8  $\mu\text{mol}$  and THF (200  $\mu\text{L}$ ). The solution was cooled to  $-78\text{ }^\circ\text{C}$  *via*  $\text{Me}_2\text{CO}/\text{CO}_{2(\text{s})}$  bath. Neat DIBAL-H (20  $\mu\text{L}$ , 0.11 mmol) was added dropwise to the reaction vessel. The cooling bath was removed, and the reaction allowed to stir warming to room temperature over 30 minutes. Upon consumption of starting material as indicated by TLC analysis, the reaction was quenched at  $-78\text{ }^\circ\text{C}$  by dropwise addition of MeOH (50  $\mu\text{L}$ ). The quenched reaction mixture was allowed to warm to room temperature, then saturated Rochelle's salt (1 mL) and EtOAc (1 mL) were added. The resulting slurry was allowed to stir at room temperature for 1 hour. The organic layer was separated, and the aqueous layer was extracted with EtOAc (3 x 1 mL). The organic extracts were dried over  $\text{Na}_2\text{SO}_4$ , filtered, and concentrated *in vacuo*. The crude product was purified by column chromatography ( $\text{SiO}_2$ , 25% EtOAc in hexanes) affording **wickerol B (2)**, 1.0 mg, 59% as a white residue.

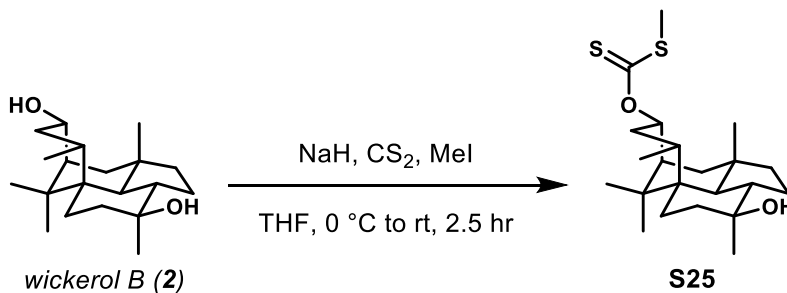

To a 1-dram vial equipped with a stir bar was added dry NaH (1.0 mg, 0.042 mmol) followed by THF (50  $\mu\text{L}$ ). The mixture was allowed to stir vigorously at room temperature until formation of a suspension, then cooled to  $0\text{ }^\circ\text{C}$  *via* ice bath. **Wickerol B (2)**, 1.3 mg, 4.2  $\mu\text{mol}$  was added to the reaction vessel as a solution in THF (50  $\mu\text{L}$ ), rinsing with THF (2 x 50  $\mu\text{L}$ ). The mixture was allowed to stir at  $0\text{ }^\circ\text{C}$  for 30 minutes. Carbon disulfide (neat) (5.1  $\mu\text{L}$ , 0.085 mmol) was added to the reaction vessel. The mixture was allowed to stir at  $0\text{ }^\circ\text{C}$  for 30 minutes. Methyl iodide (neat) (5.3  $\mu\text{L}$ , 0.085 mmol) was added to the reaction vessel. The mixture was allowed to warm to room temperature, then allowed to stir at room temperature for 2.5 hours. Upon consumption of starting material as indicated by TLC analysis, the reaction was quenched at room temperature by dropwise addition of saturated  $\text{NH}_4\text{Cl}_{(\text{aq})}$  (0.5 mL). The quenched reaction mixture was diluted with water (0.5 mL). The aqueous layer was extracted with EtOAc (3 x 2 mL). The organic extracts were washed with brine (1 x 2 mL), dried over  $\text{Na}_2\text{SO}_4$ , filtered, and concentrated *in vacuo*. The crude product was purified by column chromatography ( $\text{SiO}_2$ , 20% EtOAc in hexanes) affording **xanthate ester S25** (0.7 mg, 42%) as a colorless residue.

### xanthate ester S25

$^1\text{H NMR}$  (500 MHz,  $\text{CDCl}_3$ )  $\delta$  5.92 (dd,  $J = 10.3, 6.1$  Hz, 1H), 2.74 (dt,  $J = 16.6, 10.1$  Hz, 1H), 2.53 (s, 3H), 2.11-2.05 (m, 1H), 1.92 (dd,  $J = 13.7, 2.8$  Hz, 1H), 1.88-1.69 (m, 4H), 1.69-1.58 (m, 4H), 1.50-1.42 (m, 2H), 1.31 (d,  $J = 12.9$  Hz, 1H), 1.24-1.20 (m, 1H), 1.19 (s, 3H), 1.12 (s, 3H), 1.11 (d,  $J = 7.1$  Hz, 3H), 1.09-1.02 (m, 1H), 0.98 (s, 3H), 0.97 (s, 3H) ppm.

This material was prepared only once and was not characterized beyond  $^1\text{H NMR}$  spectroscopy.

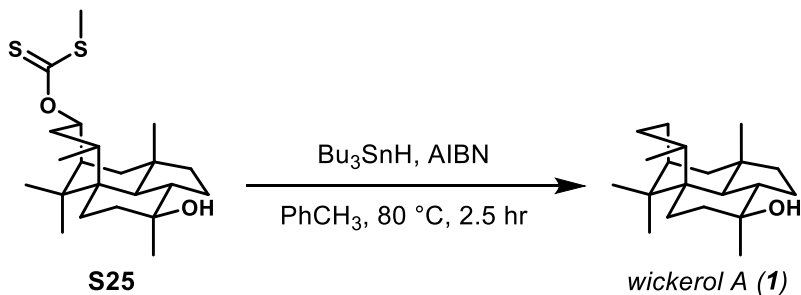

To a 1-dram vial equipped with a stir bar was added **xanthate ester S25** (1.8 mg, 4.5  $\mu\text{mol}$ ) and toluene (350  $\mu\text{L}$ ). AIBN (0.75  $\mu\text{g}$ , 0.45  $\mu\text{mol}$ ) was added as a stock solution in toluene (50  $\mu\text{L}$ ).  $\text{Bu}_3\text{SnH}$  (2.0 mg, 6.8  $\mu\text{mol}$ ) was added as a stock solution in toluene (50  $\mu\text{L}$ ). The reaction mixture was heated to 80  $^\circ\text{C}$  *via* oil bath and allowed to stir for 2.5 hours. Upon consumption of starting material as indicated by TLC analysis, the reaction vessel was allowed to cool to room temperature, then filtered through a plug of  $\text{K}_2\text{CO}_3/\text{SiO}_2$  (10 w/w%), rinsing with DCM.<sup>11</sup> The filtrate was concentrated *in vacuo*. The crude product was purified by column chromatography ( $\text{SiO}_2$ , 10% to 15% to 25% EtOAc in hexanes, stepped gradient) affording **wickerol A (1)** as a white solid (0.87 mg, 67%). The characterization data obtained are in good agreement with those previously reported.<sup>10</sup>

#### wickerol A (1)

$^1\text{H NMR}$  (600 MHz,  $\text{CDCl}_3$ )  $\delta$  2.16–2.05 (m, 2H), 2.05–1.96 (m, 1H), 1.90–1.83 (m, 1H), 1.83–1.74 (m, 1H), 1.72–1.65 (m, 2H), 1.65–1.56 (m, 3H), 1.52–1.43 (m, 4H), 1.41 (d,  $J = 11.1$  Hz, 1H), 1.27 (d,  $J = 13.6$  Hz, H), 1.24–1.18 (m, 1H), 1.17 (s, 3H), 1.052 (s, 3H), 1.048 (s, 3H), 1.02 (d,  $J = 6.9$  Hz, 3H), 1.01–0.97 (m, 1H), 0.94 (s, 3H) ppm;  $^{13}\text{C NMR}$  (151 MHz,  $\text{CDCl}_3$ )  $\delta$  74.1, 52.2, 44.5, 44.1, 43.1, 41.2, 41.0, 39.4, 38.9, 38.8, 29.0, 26.8, 26.5, 25.84, 25.76, 24.8, 23.1, 21.7, 20.6, 20.0 ppm;  $[\alpha]_{\text{D}}^{22.4} = +10.7$  (c 0.23,  $\text{CHCl}_3$ ); **FTIR** (film)  $\nu_{\text{max}}$  3347, 2955, 2923, 2878, 1457, 1381, 1098  $\text{cm}^{-1}$ .

### III. References

1. Harb, H. Y.; Procter, D. J. *Synlett* **2012**, 2012 (01), 6–20.
2. Hutton, T. K.; Muir, K. W.; Procter, D. J. *Org. Lett.* **2002**, 4 (14), 2345–2347.
3. Hutton, T. K.; Muir, K. W.; Procter, D. J. *Org. Lett.* **2003**, 5 (25), 4811–4814.
4. Singh, S.; Guiry, P. J. *J. Org. Chem.* **2009**, 74 (15), 5758–5761.
5. Kerr, M. S.; Read de Alaniz, J.; Rovis, T. *J. Org. Chem.* **2005**, 70, 5725–5728.
6. Szostak, M.; Spain, M.; Procter, D. J. *J. Org. Chem.* **2012**, 77 (7), 3049–3059.
7. Kolb, A.; Zuo, W.; Siewert, J.; Harms, K.; Von Zezschwitz, P. *Chem. A Eur. J.* **2013**, 19 (48), 16366–16373.
8. Ratnikov, M. O.; Goldmann, P. L.; McLaughlin, E. C.; Doyle, M. P. *Org. Synth.* **2012**, 89, 19–33.
9. Wuts, P. G. M. *Synth. Commun.* **1981**, 11 (2), 139–140.
10. Deng, J.; Ning, Y.; Tian, H.; Gui, J. *J. Am. Chem. Soc.* **2020**, 142 (10), 4690–4695.
11. Harrowven, D. C.; Curran, D. P.; Kostiuik, S. L.; Wallis-Guy, I. L.; Whiting, S.; Stenning, K. J.; Tang, B.; Packard, E.; Nanson, L. *Chem. Commun.* **2010**, 46 (34), 6335–6337.

## IV. Experimental Data

### SFC Data

#### Racemic 1-methylcyclohex-2-en-1-ol

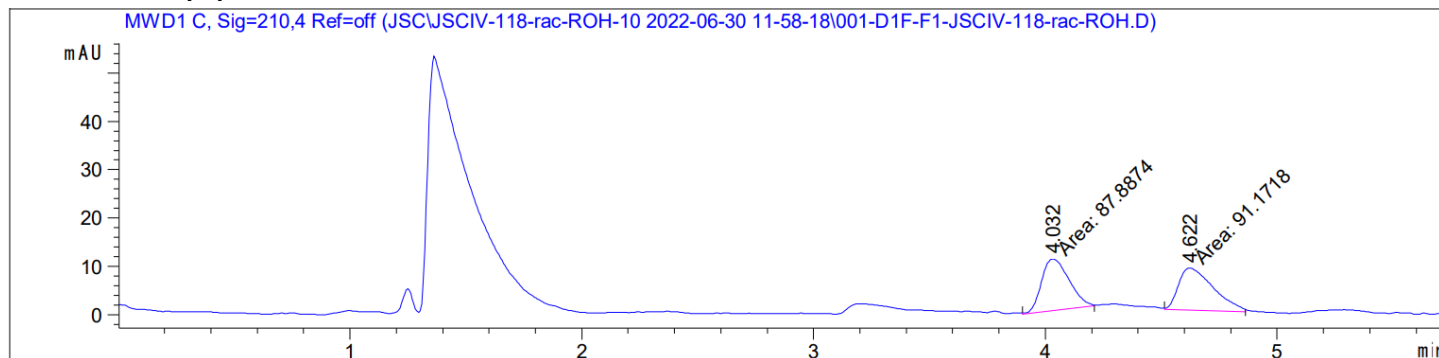

Signal 3: MWD1 C, Sig=210,4 Ref=off

| Peak # | RetTime [min] | Type | Width [min] | Area [mAU*s] | Height [mAU] | Area %  |
|--------|---------------|------|-------------|--------------|--------------|---------|
| 1      | 4.032         | MM   | 0.1371      | 87.88737     | 10.68692     | 49.0829 |
| 2      | 4.622         | MM   | 0.1749      | 91.17184     | 8.68892      | 50.9171 |

Totals : 179.05921 19.37584

#### Compound 40

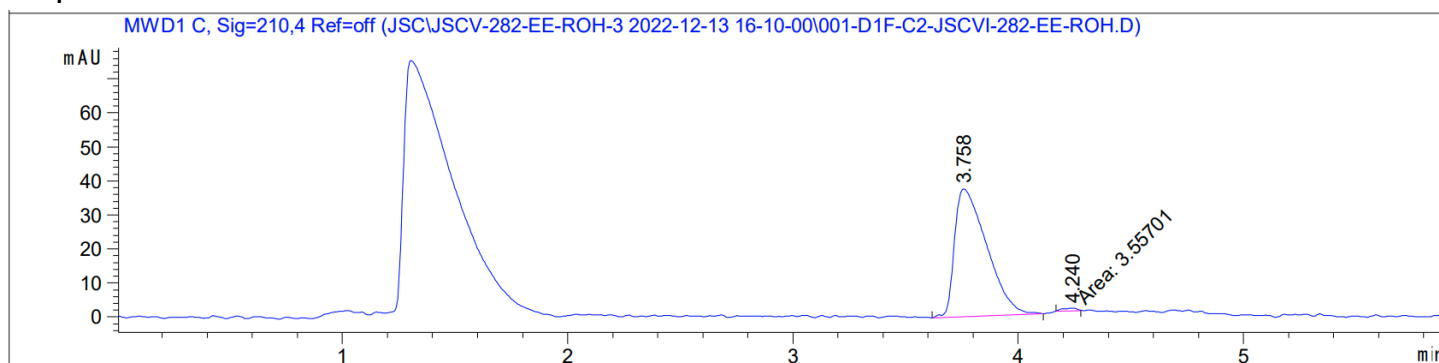

Signal 3: MWD1 C, Sig=210,4 Ref=off

| Peak # | RetTime [min] | Type | Width [min] | Area [mAU*s] | Height [mAU] | Area %  |
|--------|---------------|------|-------------|--------------|--------------|---------|
| 1      | 3.758         | VB R | 0.1495      | 372.07651    | 37.57992     | 99.0531 |
| 2      | 4.240         | MM   | 0.0766      | 3.55701      | 7.73441e-1   | 0.9469  |

Totals : 375.63352 38.35336

Please note that the difference in retention times between the racemic and enantioenriched samples is due to a six-month interval between data collection.

## X-ray Diffraction Data

X-ray Data Collection, Structure Solution and Refinement for **21**.

A colorless crystal of approximate dimensions 0.108 x 0.347 x 0.405 mm was mounted on a glass fiber and transferred to a Bruker SMART APEX II diffractometer system. The APEX2<sup>1</sup> program package was used to determine the unit-cell parameters and for data collection (20 sec/frame scan time). The raw frame data was processed using SAINT<sup>2</sup> and SADABS<sup>3</sup> to yield the reflection data file. Subsequent calculations were carried out using the SHELXTL<sup>4</sup> program package. The diffraction symmetry was  $2/m$  and the systematic absences were consistent with the monoclinic space groups  $P2_1$  and  $P2_1/m$ . It was later determined that space group  $P2_1$  was correct.

The structure was solved by direct methods and refined on  $F^2$  by full-matrix least-squares techniques. The analytical scattering factors<sup>5</sup> for neutral atoms were used throughout the analysis. Hydrogen atom H(1) was located from a difference-Fourier map and refined ( $x, y, z$  and  $U_{iso}$ ). The remaining hydrogen atoms were included using a riding model. The complex was refined as a two-component twin.

Least-squares analysis yielded  $wR2 = 0.0683$  and  $Goof = 1.047$  for 142 variables refined against 2866 data (0.74 Å),  $R1 = 0.0282$  for those 2813 data with  $I > 2.0\sigma(I)$ . The absolute structure was assigned according to the synthetic method employed. Refinement of the Flack<sup>6</sup> parameter was ambiguous due to the lack of an atom heavier than oxygen and the radiation (Mo) used.

## References.

1. APEX2 Version 2014.11-0, Bruker AXS, Inc.; Madison, WI 2014.
2. SAINT Version 8.34a, Bruker AXS, Inc.; Madison, WI 2013.
3. Sheldrick, G. M. SADABS, Version 2014/5, Bruker AXS, Inc.; Madison, WI 2014.
4. Sheldrick, G. M. SHELXTL, Version 2014/7, Bruker AXS, Inc.; Madison, WI 2014.
5. International Tables for Crystallography 1992, Vol. C., Dordrecht: Kluwer Academic Publishers.
6. Parsons, S., Flack, H. D., Wagner, T. Acta. Cryst. B69, 249-259, 2013.

---

Definitions:

$$wR2 = [\sum[w(F_o^2 - F_c^2)^2] / \sum[w(F_o^2)^2] ]^{1/2}$$

$$R1 = \sum ||F_o| - |F_c|| / \sum |F_o|$$

Goof =  $S = [\sum[w(F_o^2 - F_c^2)^2] / (n-p)]^{1/2}$  where n is the number of reflections and p is the total number of parameters refined.

The thermal ellipsoid plot is shown at the 50% probability level.

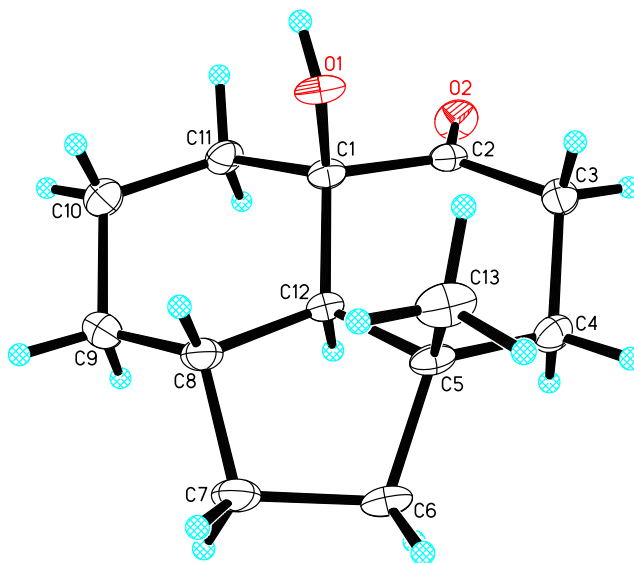

Table 1. Crystal data and structure refinement for **21**.

|                                         |                                                |                   |
|-----------------------------------------|------------------------------------------------|-------------------|
| Identification code                     | cdv41 (Jonathan Chung)                         |                   |
| Empirical formula                       | C <sub>13</sub> H <sub>20</sub> O <sub>2</sub> |                   |
| Formula weight                          | 208.29                                         |                   |
| Temperature                             | 93(2) K                                        |                   |
| Wavelength                              | 0.71073 Å                                      |                   |
| Crystal system                          | Monoclinic                                     |                   |
| Space group                             | P2 <sub>1</sub>                                |                   |
| Unit cell dimensions                    | a = 8.4288(10) Å                               | ∠ = 90°.          |
|                                         | b = 5.9423(7) Å                                | ∠ = 90.0207(15)°. |
|                                         | c = 11.5281(13) Å                              | ∠ = 90°.          |
| Volume                                  | 577.40(12) Å <sup>3</sup>                      |                   |
| Z                                       | 2                                              |                   |
| Density (calculated)                    | 1.198 Mg/m <sup>3</sup>                        |                   |
| Absorption coefficient                  | 0.079 mm <sup>-1</sup>                         |                   |
| F(000)                                  | 228                                            |                   |
| Crystal color                           | colorless                                      |                   |
| Crystal size                            | 0.405 x 0.347 x 0.108 mm <sup>3</sup>          |                   |
| Theta range for data collection         | 1.766 to 28.953°                               |                   |
| Index ranges                            | -11 ≤ h ≤ 11, -8 ≤ k ≤ 8, -15 ≤ l ≤ 15         |                   |
| Reflections collected                   | 12947                                          |                   |
| Independent reflections                 | 2866 [R(int) = 0.0237]                         |                   |
| Completeness to theta = 25.242°         | 100.0 %                                        |                   |
| Absorption correction                   | Semi-empirical from equivalents                |                   |
| Max. and min. transmission              | 0.8621 and 0.8359                              |                   |
| Refinement method                       | Full-matrix least-squares on F <sup>2</sup>    |                   |
| Data / restraints / parameters          | 2866 / 1 / 142                                 |                   |
| Goodness-of-fit on F <sup>2</sup>       | 1.047                                          |                   |
| Final R indices [I > 2σ(I) = 2813 data] | R1 = 0.0282, wR2 = 0.0675                      |                   |
| R indices (all data, 0.74 Å)            | R1 = 0.0291, wR2 = 0.0683                      |                   |
| Largest diff. peak and hole             | 0.176 and -0.141 e.Å <sup>-3</sup>             |                   |

Table 2. Atomic coordinates ( $\times 10^4$ ) and equivalent isotropic displacement parameters ( $\text{\AA}^2 \times 10^3$ ) for cdv41.  $U(\text{eq})$  is defined as one third of the trace of the orthogonalized  $U^{ij}$  tensor.

|       | x       | y       | z       | $U(\text{eq})$ |
|-------|---------|---------|---------|----------------|
| O(1)  | 5839(2) | 3236(2) | 3435(1) | 18(1)          |
| O(2)  | 6941(2) | 7081(2) | 5370(1) | 23(1)          |
| C(1)  | 6217(2) | 5587(3) | 3475(2) | 15(1)          |
| C(2)  | 7315(2) | 5974(3) | 4529(2) | 16(1)          |
| C(3)  | 8935(2) | 4873(3) | 4445(2) | 19(1)          |
| C(4)  | 9843(2) | 5560(3) | 3333(2) | 19(1)          |
| C(5)  | 8831(2) | 5076(3) | 2252(2) | 16(1)          |
| C(6)  | 9313(2) | 6292(3) | 1114(2) | 20(1)          |
| C(7)  | 7739(2) | 6629(3) | 413(2)  | 24(1)          |
| C(8)  | 6364(2) | 6082(3) | 1260(2) | 20(1)          |
| C(9)  | 4905(3) | 7588(4) | 1263(2) | 28(1)          |
| C(10) | 3846(2) | 6956(4) | 2299(2) | 27(1)          |
| C(11) | 4727(2) | 7075(3) | 3468(2) | 19(1)          |
| C(12) | 7214(2) | 6213(3) | 2423(2) | 14(1)          |
| C(13) | 8773(3) | 2521(3) | 2021(2) | 24(1)          |



Table 3. Bond lengths [ $\text{\AA}$ ] and angles [ $^\circ$ ] for cdv41.

---

|              |            |
|--------------|------------|
| O(1)-C(1)    | 1.4340(19) |
| O(1)-H(1)    | 0.82(3)    |
| O(2)-C(2)    | 1.213(2)   |
| C(1)-C(12)   | 1.521(2)   |
| C(1)-C(11)   | 1.536(2)   |
| C(1)-C(2)    | 1.544(3)   |
| C(2)-C(3)    | 1.518(2)   |
| C(3)-C(4)    | 1.548(2)   |
| C(3)-H(3A)   | 0.9900     |
| C(3)-H(3B)   | 0.9900     |
| C(4)-C(5)    | 1.537(3)   |
| C(4)-H(4A)   | 0.9900     |
| C(4)-H(4B)   | 0.9900     |
| C(5)-C(12)   | 1.534(3)   |
| C(5)-C(13)   | 1.542(2)   |
| C(5)-C(6)    | 1.552(3)   |
| C(6)-C(7)    | 1.566(3)   |
| C(6)-H(6A)   | 0.9900     |
| C(6)-H(6B)   | 0.9900     |
| C(7)-C(8)    | 1.550(3)   |
| C(7)-H(7A)   | 0.9900     |
| C(7)-H(7B)   | 0.9900     |
| C(8)-C(9)    | 1.521(3)   |
| C(8)-C(12)   | 1.522(3)   |
| C(8)-H(8A)   | 1.0000     |
| C(9)-C(10)   | 1.537(3)   |
| C(9)-H(9A)   | 0.9900     |
| C(9)-H(9B)   | 0.9900     |
| C(10)-C(11)  | 1.540(3)   |
| C(10)-H(10A) | 0.9900     |
| C(10)-H(10B) | 0.9900     |
| C(11)-H(11A) | 0.9900     |
| C(11)-H(11B) | 0.9900     |
| C(12)-H(12A) | 1.0000     |
| C(13)-H(13A) | 0.9800     |
| C(13)-H(13B) | 0.9800     |

|                  |            |
|------------------|------------|
| C(13)-H(13C)     | 0.9800     |
| C(1)-O(1)-H(1)   | 107.1(16)  |
| O(1)-C(1)-C(12)  | 109.59(14) |
| O(1)-C(1)-C(11)  | 112.25(14) |
| C(12)-C(1)-C(11) | 107.90(15) |
| O(1)-C(1)-C(2)   | 107.66(14) |
| C(12)-C(1)-C(2)  | 105.07(14) |
| C(11)-C(1)-C(2)  | 114.09(15) |
| O(2)-C(2)-C(3)   | 121.22(18) |
| O(2)-C(2)-C(1)   | 123.64(17) |
| C(3)-C(2)-C(1)   | 115.15(15) |
| C(2)-C(3)-C(4)   | 112.58(15) |
| C(2)-C(3)-H(3A)  | 109.1      |
| C(4)-C(3)-H(3A)  | 109.1      |
| C(2)-C(3)-H(3B)  | 109.1      |
| C(4)-C(3)-H(3B)  | 109.1      |
| H(3A)-C(3)-H(3B) | 107.8      |
| C(5)-C(4)-C(3)   | 110.34(15) |
| C(5)-C(4)-H(4A)  | 109.6      |
| C(3)-C(4)-H(4A)  | 109.6      |
| C(5)-C(4)-H(4B)  | 109.6      |
| C(3)-C(4)-H(4B)  | 109.6      |
| H(4A)-C(4)-H(4B) | 108.1      |
| C(12)-C(5)-C(4)  | 107.84(13) |
| C(12)-C(5)-C(13) | 115.32(16) |
| C(4)-C(5)-C(13)  | 110.00(16) |
| C(12)-C(5)-C(6)  | 97.85(15)  |
| C(4)-C(5)-C(6)   | 116.90(15) |
| C(13)-C(5)-C(6)  | 108.70(15) |
| C(5)-C(6)-C(7)   | 105.88(15) |
| C(5)-C(6)-H(6A)  | 110.6      |
| C(7)-C(6)-H(6A)  | 110.6      |
| C(5)-C(6)-H(6B)  | 110.6      |
| C(7)-C(6)-H(6B)  | 110.6      |
| H(6A)-C(6)-H(6B) | 108.7      |
| C(8)-C(7)-C(6)   | 106.34(15) |
| C(8)-C(7)-H(7A)  | 110.5      |

|                     |            |
|---------------------|------------|
| C(6)-C(7)-H(7A)     | 110.5      |
| C(8)-C(7)-H(7B)     | 110.5      |
| C(6)-C(7)-H(7B)     | 110.5      |
| H(7A)-C(7)-H(7B)    | 108.7      |
| C(9)-C(8)-C(12)     | 110.37(16) |
| C(9)-C(8)-C(7)      | 118.90(16) |
| C(12)-C(8)-C(7)     | 101.11(15) |
| C(9)-C(8)-H(8A)     | 108.7      |
| C(12)-C(8)-H(8A)    | 108.7      |
| C(7)-C(8)-H(8A)     | 108.7      |
| C(8)-C(9)-C(10)     | 109.15(17) |
| C(8)-C(9)-H(9A)     | 109.9      |
| C(10)-C(9)-H(9A)    | 109.9      |
| C(8)-C(9)-H(9B)     | 109.9      |
| C(10)-C(9)-H(9B)    | 109.9      |
| H(9A)-C(9)-H(9B)    | 108.3      |
| C(9)-C(10)-C(11)    | 112.87(17) |
| C(9)-C(10)-H(10A)   | 109.0      |
| C(11)-C(10)-H(10A)  | 109.0      |
| C(9)-C(10)-H(10B)   | 109.0      |
| C(11)-C(10)-H(10B)  | 109.0      |
| H(10A)-C(10)-H(10B) | 107.8      |
| C(1)-C(11)-C(10)    | 111.86(16) |
| C(1)-C(11)-H(11A)   | 109.2      |
| C(10)-C(11)-H(11A)  | 109.2      |
| C(1)-C(11)-H(11B)   | 109.2      |
| C(10)-C(11)-H(11B)  | 109.2      |
| H(11A)-C(11)-H(11B) | 107.9      |
| C(1)-C(12)-C(8)     | 115.46(15) |
| C(1)-C(12)-C(5)     | 119.06(15) |
| C(8)-C(12)-C(5)     | 106.40(15) |
| C(1)-C(12)-H(12A)   | 104.8      |
| C(8)-C(12)-H(12A)   | 104.8      |
| C(5)-C(12)-H(12A)   | 104.8      |
| C(5)-C(13)-H(13A)   | 109.5      |
| C(5)-C(13)-H(13B)   | 109.5      |
| H(13A)-C(13)-H(13B) | 109.5      |
| C(5)-C(13)-H(13C)   | 109.5      |

|                     |       |
|---------------------|-------|
| H(13A)-C(13)-H(13C) | 109.5 |
| H(13B)-C(13)-H(13C) | 109.5 |

---

Table 4. Anisotropic displacement parameters ( $\text{\AA}^2 \times 10^3$ ) for cdv41. The anisotropic displacement factor exponent takes the form:  $-2\sigma^2 [ h^2 a^{*2} U^{11} + \dots + 2 h k a^* b^* U^{12} ]$

|       | $U^{11}$ | $U^{22}$ | $U^{33}$ | $U^{23}$ | $U^{13}$ | $U^{12}$ |
|-------|----------|----------|----------|----------|----------|----------|
| O(1)  | 21(1)    | 14(1)    | 20(1)    | 0(1)     | 9(1)     | -5(1)    |
| O(2)  | 23(1)    | 27(1)    | 18(1)    | -7(1)    | 4(1)     | -1(1)    |
| C(1)  | 15(1)    | 13(1)    | 16(1)    | -1(1)    | 4(1)     | -1(1)    |
| C(2)  | 16(1)    | 15(1)    | 17(1)    | 2(1)     | 4(1)     | -2(1)    |
| C(3)  | 17(1)    | 22(1)    | 17(1)    | 2(1)     | 1(1)     | 2(1)     |
| C(4)  | 14(1)    | 20(1)    | 22(1)    | -1(1)    | 4(1)     | 1(1)     |
| C(5)  | 17(1)    | 12(1)    | 19(1)    | -2(1)    | 8(1)     | 0(1)     |
| C(6)  | 21(1)    | 20(1)    | 20(1)    | -1(1)    | 10(1)    | -4(1)    |
| C(7)  | 25(1)    | 33(1)    | 15(1)    | 1(1)     | 5(1)     | -9(1)    |
| C(8)  | 20(1)    | 26(1)    | 14(1)    | 1(1)     | 2(1)     | -7(1)    |
| C(9)  | 22(1)    | 43(1)    | 21(1)    | 12(1)    | 0(1)     | 0(1)     |
| C(10) | 15(1)    | 40(1)    | 26(1)    | 9(1)     | 3(1)     | 2(1)     |
| C(11) | 13(1)    | 21(1)    | 22(1)    | 1(1)     | 5(1)     | 3(1)     |
| C(12) | 14(1)    | 13(1)    | 14(1)    | 0(1)     | 4(1)     | -2(1)    |
| C(13) | 28(1)    | 14(1)    | 30(1)    | -5(1)    | 12(1)    | 1(1)     |

Table 5. Hydrogen coordinates ( $\times 10^4$ ) and isotropic displacement parameters ( $\text{\AA}^2 \times 10^3$ )

for cdv41.

|        | x        | y        | z        | U(eq) |
|--------|----------|----------|----------|-------|
| H(1)   | 5110(30) | 3030(40) | 3890(20) | 22(6) |
| H(3A)  | 8804     | 3218     | 4455     | 22    |
| H(3B)  | 9573     | 5300     | 5132     | 22    |
| H(4A)  | 10102    | 7184     | 3365     | 22    |
| H(4B)  | 10850    | 4709     | 3285     | 22    |
| H(6A)  | 10074    | 5365     | 667      | 24    |
| H(6B)  | 9812     | 7762     | 1288     | 24    |
| H(7A)  | 7655     | 8199     | 133      | 29    |
| H(7B)  | 7709     | 5605     | -264     | 29    |
| H(8A)  | 6018     | 4493     | 1127     | 24    |
| H(9A)  | 4308     | 7393     | 530      | 34    |
| H(9B)  | 5230     | 9184     | 1325     | 34    |
| H(10A) | 3438     | 5410     | 2185     | 32    |
| H(10B) | 2924     | 7988     | 2322     | 32    |
| H(11A) | 5036     | 8653     | 3625     | 22    |
| H(11B) | 4005     | 6583     | 4095     | 22    |
| H(12A) | 7464     | 7845     | 2529     | 16    |
| H(13A) | 9849     | 1962     | 1878     | 36    |
| H(13B) | 8108     | 2224     | 1341     | 36    |
| H(13C) | 8324     | 1752     | 2698     | 36    |

Table 6. Torsion angles [°] for cdv41.

---

|                        |             |
|------------------------|-------------|
| O(1)-C(1)-C(2)-O(2)    | -114.43(18) |
| C(12)-C(1)-C(2)-O(2)   | 128.82(19)  |
| C(11)-C(1)-C(2)-O(2)   | 10.9(2)     |
| O(1)-C(1)-C(2)-C(3)    | 66.01(18)   |
| C(12)-C(1)-C(2)-C(3)   | -50.74(17)  |
| C(11)-C(1)-C(2)-C(3)   | -168.71(14) |
| O(2)-C(2)-C(3)-C(4)    | -124.6(2)   |
| C(1)-C(2)-C(3)-C(4)    | 54.98(19)   |
| C(2)-C(3)-C(4)-C(5)    | -54.7(2)    |
| C(3)-C(4)-C(5)-C(12)   | 53.10(18)   |
| C(3)-C(4)-C(5)-C(13)   | -73.44(18)  |
| C(3)-C(4)-C(5)-C(6)    | 162.01(16)  |
| C(12)-C(5)-C(6)-C(7)   | -35.06(17)  |
| C(4)-C(5)-C(6)-C(7)    | -149.69(16) |
| C(13)-C(5)-C(6)-C(7)   | 85.1(2)     |
| C(5)-C(6)-C(7)-C(8)    | 11.88(19)   |
| C(6)-C(7)-C(8)-C(9)    | 137.84(19)  |
| C(6)-C(7)-C(8)-C(12)   | 16.94(19)   |
| C(12)-C(8)-C(9)-C(10)  | -54.6(2)    |
| C(7)-C(8)-C(9)-C(10)   | -170.70(18) |
| C(8)-C(9)-C(10)-C(11)  | 55.9(2)     |
| O(1)-C(1)-C(11)-C(10)  | -68.1(2)    |
| C(12)-C(1)-C(11)-C(10) | 52.78(19)   |
| C(2)-C(1)-C(11)-C(10)  | 169.11(15)  |
| C(9)-C(10)-C(11)-C(1)  | -56.3(2)    |
| O(1)-C(1)-C(12)-C(8)   | 67.4(2)     |
| C(11)-C(1)-C(12)-C(8)  | -55.1(2)    |
| C(2)-C(1)-C(12)-C(8)   | -177.15(16) |
| O(1)-C(1)-C(12)-C(5)   | -61.1(2)    |
| C(11)-C(1)-C(12)-C(5)  | 176.45(15)  |
| C(2)-C(1)-C(12)-C(5)   | 54.37(19)   |
| C(9)-C(8)-C(12)-C(1)   | 57.5(2)     |
| C(7)-C(8)-C(12)-C(1)   | -175.77(15) |
| C(9)-C(8)-C(12)-C(5)   | -168.02(14) |
| C(7)-C(8)-C(12)-C(5)   | -41.28(18)  |
| C(4)-C(5)-C(12)-C(1)   | -57.88(19)  |

|                       |             |
|-----------------------|-------------|
| C(13)-C(5)-C(12)-C(1) | 65.5(2)     |
| C(6)-C(5)-C(12)-C(1)  | -179.49(16) |
| C(4)-C(5)-C(12)-C(8)  | 169.58(15)  |
| C(13)-C(5)-C(12)-C(8) | -67.1(2)    |
| C(6)-C(5)-C(12)-C(8)  | 47.97(17)   |

---



Table 7. Hydrogen bonds for cdv41 [ $\text{\AA}$  and  $^\circ$ ].

| D-H...A            | d(D-H)  | d(H...A) | d(D...A) | $\angle$ (DHA) |
|--------------------|---------|----------|----------|----------------|
| O(1)-H(1)...O(2)#1 | 0.82(3) | 2.01(3)  | 2.804(2) | 165(2)         |

Symmetry transformations used to generate equivalent atoms:

#1  $-x+1, y-1/2, -z+1$

## X-ray Data Collection, Structure Solution and Refinement for **80**.

A colorless crystal of approximate dimensions 0.051 x 0.052 x 0.192 mm was mounted in a cryoloop and transferred to a Bruker SMART APEX II diffractometer system. The APEX3<sup>1</sup> program package was used to determine the unit-cell parameters and for data collection (4-10 sec/frame scan time). The raw frame data was processed using SAINT<sup>2</sup> and SADABS<sup>3</sup> to yield the reflection data file. Subsequent calculations were carried out using the SHELXTL<sup>4</sup> program package. Thee systematic absences were consistent with the hexagonal space groups  $R\bar{3}$  and  $R\bar{3}$ . The chiral space group  $R\bar{3}$  was assigned and later determined to be correct.

The structure was solved by direct methods and refined on  $F^2$  by full-matrix least-squares techniques. The analytical scattering factors<sup>5</sup> for neutral atoms were used throughout the analysis. Hydrogen atoms were located from a difference-Fourier map and refined ( $x, y, z$  and  $U_{iso}$ )

Least-squares analysis yielded  $wR2 = 0.0658$  and  $Goof = 1.050$  for 310 variables refined against 4016 data (0.83 Å),  $R1 = 0.0255$  for those 3931 data with  $I > 2.0\sigma(I)$ . The absolute structure was assigned by refinement of the Flack<sup>6</sup> parameter.

There were high residuals present in the final difference-Fourier map. It was not possible to determine the nature of the residuals although it was probable that acetonitrile solvent was present. The SQUEEZE<sup>7a</sup> routine in the PLATON<sup>7b</sup> program package was used to account for the electrons in the solvent accessible voids.

## References.

7. APEX3 Version 2018.1-0, Bruker AXS, Inc.; Madison, WI 2018.
8. SAINT Version 8.38a, Bruker AXS, Inc.; Madison, WI 2013.
9. Sheldrick, G. M. SADABS, Version 2014/5, Bruker AXS, Inc.; Madison, WI 2014.
10. Sheldrick, G. M. SHELXTL, Version 2014/7, Bruker AXS, Inc.; Madison, WI 2014.
11. International Tables for Crystallography 1992, Vol. C., Dordrecht: Kluwer Academic Publishers.
12. Parsons, S., Flack, H. D., Wagner, T. Acta Cryst. B69, 249-259, 2013. **(Check CIF for correct reference)**
13. (a) Spek, A.L. SQUEEZE, Acta Cryst. 2015, C71, 9-19., (b) Spek, A. L. PLATON, Acta. Cryst. 2009, D65, 148-155

Definitions:

$$wR2 = [\sum[w(F_o^2 - F_c^2)^2] / \sum[w(F_o^2)^2]]^{1/2}$$

$$R1 = \sum ||F_o| - |F_c|| / \sum |F_o|$$

Goof =  $S = [\sum[w(F_o^2 - F_c^2)^2] / (n-p)]^{1/2}$  where n is the number of reflections and p is the total number of parameters refined.

The thermal ellipsoid plot is shown at the 50% probability level.

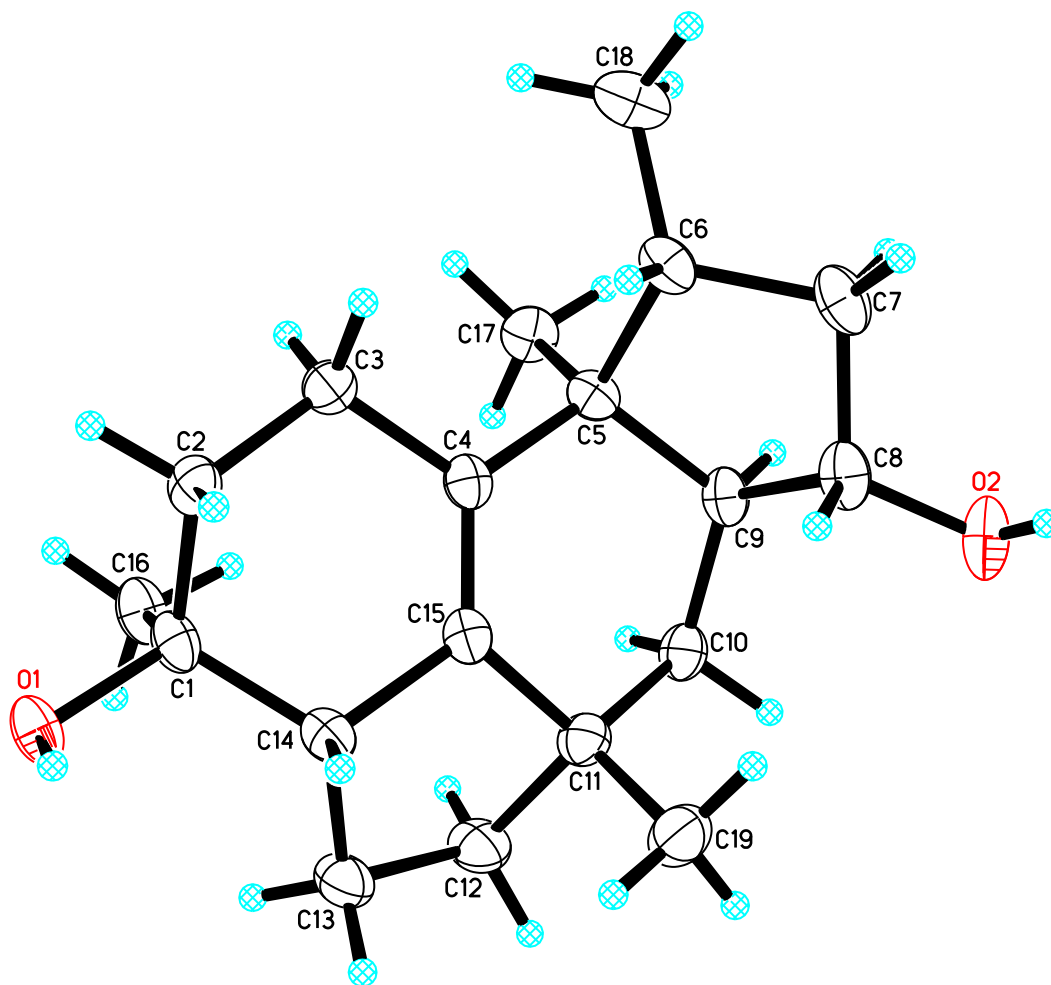

Table 1. Crystal data and structure refinement for **80**.

|                                         |                                                |           |
|-----------------------------------------|------------------------------------------------|-----------|
| Identification code                     | cdv89 (Joseph Capani Jr.)                      |           |
| Empirical formula                       | C <sub>19</sub> H <sub>30</sub> O <sub>2</sub> |           |
| Formula weight                          | 290.43                                         |           |
| Temperature                             | 93(2) K                                        |           |
| Wavelength                              | 1.54178 Å                                      |           |
| Crystal system                          | Trigonal                                       |           |
| Space group                             | R3                                             |           |
| Unit cell dimensions                    | a = 29.9115(19) Å                              | ∠ = 90°.  |
|                                         | b = 29.9115(19) Å                              | ∠ = 90°.  |
|                                         | c = 6.2915(4) Å                                | ∠ = 120°. |
| Volume                                  | 4874.8(7) Å <sup>3</sup>                       |           |
| Z                                       | 9                                              |           |
| Density (calculated)                    | 0.890 Mg/m <sup>3</sup>                        |           |
| Absorption coefficient                  | 0.431 mm <sup>-1</sup>                         |           |
| F(000)                                  | 1440                                           |           |
| Crystal color                           | colorless                                      |           |
| Crystal size                            | 0.192 x 0.052 x 0.051 mm <sup>3</sup>          |           |
| Theta range for data collection         | 2.955 to 68.957°                               |           |
| Index ranges                            | -35 ≤ h ≤ 36, -36 ≤ k ≤ 36, -7 ≤ l ≤ 7         |           |
| Reflections collected                   | 25740                                          |           |
| Independent reflections                 | 4016 [R(int) = 0.0406]                         |           |
| Completeness to theta = 67.679°         | 100.0 %                                        |           |
| Absorption correction                   | Semi-empirical from equivalents                |           |
| Max. and min. transmission              | 0.8643 and 0.7908                              |           |
| Refinement method                       | Full-matrix least-squares on F <sup>2</sup>    |           |
| Data / restraints / parameters          | 4016 / 1 / 310                                 |           |
| Goodness-of-fit on F <sup>2</sup>       | 1.050                                          |           |
| Final R indices [I > 2σ(I) = 3931 data] | R1 = 0.0255, wR2 = 0.0653                      |           |
| R indices (all data, ? Å)               | R1 = 0.0262, wR2 = 0.0658                      |           |
| Absolute structure parameter            | -0.02(8)                                       |           |
| Largest diff. peak and hole             | 0.103 and -0.123 e.Å <sup>-3</sup>             |           |

Table 2. Atomic coordinates ( $\times 10^4$ ) and equivalent isotropic displacement parameters ( $\text{\AA}^2 \times 10^3$ ) for cdv89.  $U(\text{eq})$  is defined as one third of the trace of the orthogonalized  $U^{ij}$  tensor.

|       | x       | y       | z       | $U(\text{eq})$ |
|-------|---------|---------|---------|----------------|
| O(1)  | 6380(1) | 6760(1) | 5204(2) | 25(1)          |
| O(2)  | 6626(1) | 9672(1) | 5997(2) | 32(1)          |
| C(1)  | 6179(1) | 7108(1) | 4996(2) | 23(1)          |
| C(2)  | 5863(1) | 7069(1) | 6961(2) | 24(1)          |
| C(3)  | 5606(1) | 7403(1) | 6754(3) | 25(1)          |
| C(4)  | 5946(1) | 7921(1) | 5730(2) | 20(1)          |
| C(5)  | 5715(1) | 8272(1) | 5480(2) | 21(1)          |
| C(6)  | 5565(1) | 8396(1) | 7740(2) | 24(1)          |
| C(7)  | 5854(1) | 8987(1) | 7891(2) | 28(1)          |
| C(8)  | 6336(1) | 9141(1) | 6581(3) | 25(1)          |
| C(9)  | 6114(1) | 8809(1) | 4605(2) | 22(1)          |
| C(10) | 6489(1) | 8806(1) | 2964(2) | 24(1)          |
| C(11) | 6765(1) | 8516(1) | 3674(2) | 24(1)          |
| C(12) | 6894(1) | 8262(1) | 1811(3) | 30(1)          |
| C(13) | 6962(1) | 7832(1) | 2845(3) | 29(1)          |
| C(14) | 6619(1) | 7670(1) | 4874(2) | 23(1)          |
| C(15) | 6410(1) | 8041(1) | 4953(2) | 20(1)          |
| C(16) | 5843(1) | 6927(1) | 3009(3) | 28(1)          |
| C(17) | 5252(1) | 8015(1) | 3942(3) | 27(1)          |
| C(18) | 4991(1) | 8154(1) | 8223(3) | 37(1)          |
| C(19) | 7267(1) | 8870(1) | 4902(3) | 33(1)          |

Table 3. Bond lengths [ $\text{\AA}$ ] and angles [ $^\circ$ ] for cdv89.

---

|              |            |
|--------------|------------|
| O(1)-C(1)    | 1.4430(17) |
| O(1)-H(1)    | 0.90(2)    |
| O(2)-C(8)    | 1.4242(19) |
| O(2)-H(2)    | 0.76(3)    |
| C(1)-C(16)   | 1.524(2)   |
| C(1)-C(2)    | 1.526(2)   |
| C(1)-C(14)   | 1.533(2)   |
| C(2)-C(3)    | 1.539(2)   |
| C(2)-H(2A)   | 0.97(2)    |
| C(2)-H(2B)   | 1.00(2)    |
| C(3)-C(4)    | 1.507(2)   |
| C(3)-H(3A)   | 0.99(2)    |
| C(3)-H(3B)   | 0.99(2)    |
| C(4)-C(15)   | 1.341(2)   |
| C(4)-C(5)    | 1.5264(19) |
| C(5)-C(17)   | 1.544(2)   |
| C(5)-C(9)    | 1.546(2)   |
| C(5)-C(6)    | 1.590(2)   |
| C(6)-C(18)   | 1.524(2)   |
| C(6)-C(7)    | 1.533(2)   |
| C(6)-H(6A)   | 1.010(19)  |
| C(7)-C(8)    | 1.520(2)   |
| C(7)-H(7A)   | 1.02(2)    |
| C(7)-H(7B)   | 0.99(2)    |
| C(8)-C(9)    | 1.521(2)   |
| C(8)-H(8A)   | 1.00(2)    |
| C(9)-C(10)   | 1.528(2)   |
| C(9)-H(9A)   | 0.986(18)  |
| C(10)-C(11)  | 1.533(2)   |
| C(10)-H(10A) | 1.00(2)    |
| C(10)-H(10B) | 1.02(2)    |
| C(11)-C(15)  | 1.512(2)   |
| C(11)-C(19)  | 1.544(2)   |
| C(11)-C(12)  | 1.546(2)   |
| C(12)-C(13)  | 1.543(2)   |
| C(12)-H(12A) | 1.01(2)    |

|                  |            |
|------------------|------------|
| C(12)-H(12B)     | 0.97(2)    |
| C(13)-C(14)      | 1.556(2)   |
| C(13)-H(13A)     | 0.95(2)    |
| C(13)-H(13B)     | 0.97(2)    |
| C(14)-C(15)      | 1.521(2)   |
| C(14)-H(14A)     | 1.02(2)    |
| C(16)-H(16A)     | 1.01(2)    |
| C(16)-H(16B)     | 0.95(2)    |
| C(16)-H(16C)     | 0.94(2)    |
| C(17)-H(17A)     | 0.98(2)    |
| C(17)-H(17B)     | 0.96(2)    |
| C(17)-H(17C)     | 1.00(3)    |
| C(18)-H(18A)     | 0.99(2)    |
| C(18)-H(18B)     | 0.98(3)    |
| C(18)-H(18C)     | 0.99(2)    |
| C(19)-H(19A)     | 0.93(3)    |
| C(19)-H(19B)     | 0.96(3)    |
| C(19)-H(19C)     | 1.00(2)    |
|                  |            |
| C(1)-O(1)-H(1)   | 108.7(12)  |
| C(8)-O(2)-H(2)   | 104.7(17)  |
| O(1)-C(1)-C(16)  | 104.93(12) |
| O(1)-C(1)-C(2)   | 109.77(11) |
| C(16)-C(1)-C(2)  | 111.28(13) |
| O(1)-C(1)-C(14)  | 110.90(12) |
| C(16)-C(1)-C(14) | 113.56(13) |
| C(2)-C(1)-C(14)  | 106.44(12) |
| C(1)-C(2)-C(3)   | 111.98(12) |
| C(1)-C(2)-H(2A)  | 109.1(13)  |
| C(3)-C(2)-H(2A)  | 110.6(12)  |
| C(1)-C(2)-H(2B)  | 108.1(11)  |
| C(3)-C(2)-H(2B)  | 110.1(12)  |
| H(2A)-C(2)-H(2B) | 106.8(17)  |
| C(4)-C(3)-C(2)   | 113.80(13) |
| C(4)-C(3)-H(3A)  | 109.5(11)  |
| C(2)-C(3)-H(3A)  | 108.9(11)  |
| C(4)-C(3)-H(3B)  | 109.3(12)  |
| C(2)-C(3)-H(3B)  | 107.7(12)  |

|                    |            |
|--------------------|------------|
| H(3A)-C(3)-H(3B)   | 107.4(16)  |
| C(15)-C(4)-C(3)    | 120.46(13) |
| C(15)-C(4)-C(5)    | 122.81(13) |
| C(3)-C(4)-C(5)     | 116.55(13) |
| C(4)-C(5)-C(17)    | 108.84(12) |
| C(4)-C(5)-C(9)     | 111.93(12) |
| C(17)-C(5)-C(9)    | 109.17(12) |
| C(4)-C(5)-C(6)     | 110.23(12) |
| C(17)-C(5)-C(6)    | 112.91(13) |
| C(9)-C(5)-C(6)     | 103.73(12) |
| C(18)-C(6)-C(7)    | 112.77(14) |
| C(18)-C(6)-C(5)    | 116.74(13) |
| C(7)-C(6)-C(5)     | 105.18(12) |
| C(18)-C(6)-H(6A)   | 107.6(10)  |
| C(7)-C(6)-H(6A)    | 107.1(10)  |
| C(5)-C(6)-H(6A)    | 107.0(10)  |
| C(8)-C(7)-C(6)     | 102.66(12) |
| C(8)-C(7)-H(7A)    | 110.1(12)  |
| C(6)-C(7)-H(7A)    | 110.6(12)  |
| C(8)-C(7)-H(7B)    | 113.6(11)  |
| C(6)-C(7)-H(7B)    | 110.8(11)  |
| H(7A)-C(7)-H(7B)   | 109.0(16)  |
| O(2)-C(8)-C(7)     | 115.84(13) |
| O(2)-C(8)-C(9)     | 109.90(13) |
| C(7)-C(8)-C(9)     | 101.86(13) |
| O(2)-C(8)-H(8A)    | 108.3(12)  |
| C(7)-C(8)-H(8A)    | 107.9(12)  |
| C(9)-C(8)-H(8A)    | 113.1(11)  |
| C(8)-C(9)-C(10)    | 118.25(13) |
| C(8)-C(9)-C(5)     | 104.23(12) |
| C(10)-C(9)-C(5)    | 114.91(12) |
| C(8)-C(9)-H(9A)    | 103.2(10)  |
| C(10)-C(9)-H(9A)   | 107.0(10)  |
| C(5)-C(9)-H(9A)    | 108.3(10)  |
| C(9)-C(10)-C(11)   | 114.27(12) |
| C(9)-C(10)-H(10A)  | 112.0(12)  |
| C(11)-C(10)-H(10A) | 108.9(12)  |
| C(9)-C(10)-H(10B)  | 106.1(11)  |



|                     |            |
|---------------------|------------|
| C(11)-C(10)-H(10B)  | 108.5(11)  |
| H(10A)-C(10)-H(10B) | 106.7(16)  |
| C(15)-C(11)-C(10)   | 111.35(12) |
| C(15)-C(11)-C(19)   | 111.35(13) |
| C(10)-C(11)-C(19)   | 111.78(13) |
| C(15)-C(11)-C(12)   | 99.92(12)  |
| C(10)-C(11)-C(12)   | 113.17(13) |
| C(19)-C(11)-C(12)   | 108.70(14) |
| C(13)-C(12)-C(11)   | 104.98(13) |
| C(13)-C(12)-H(12A)  | 111.5(12)  |
| C(11)-C(12)-H(12A)  | 106.3(13)  |
| C(13)-C(12)-H(12B)  | 113.0(13)  |
| C(11)-C(12)-H(12B)  | 111.6(13)  |
| H(12A)-C(12)-H(12B) | 109.3(17)  |
| C(12)-C(13)-C(14)   | 105.35(12) |
| C(12)-C(13)-H(13A)  | 110.3(13)  |
| C(14)-C(13)-H(13A)  | 108.9(12)  |
| C(12)-C(13)-H(13B)  | 113.5(13)  |
| C(14)-C(13)-H(13B)  | 111.1(13)  |
| H(13A)-C(13)-H(13B) | 107.7(18)  |
| C(15)-C(14)-C(1)    | 110.98(12) |
| C(15)-C(14)-C(13)   | 104.27(12) |
| C(1)-C(14)-C(13)    | 116.98(13) |
| C(15)-C(14)-H(14A)  | 107.8(11)  |
| C(1)-C(14)-H(14A)   | 107.5(11)  |
| C(13)-C(14)-H(14A)  | 108.9(11)  |
| C(4)-C(15)-C(11)    | 126.31(13) |
| C(4)-C(15)-C(14)    | 124.37(13) |
| C(11)-C(15)-C(14)   | 108.46(12) |
| C(1)-C(16)-H(16A)   | 110.8(13)  |
| C(1)-C(16)-H(16B)   | 110.7(14)  |
| H(16A)-C(16)-H(16B) | 111.6(19)  |
| C(1)-C(16)-H(16C)   | 111.9(13)  |
| H(16A)-C(16)-H(16C) | 109.1(19)  |
| H(16B)-C(16)-H(16C) | 102.3(19)  |
| C(5)-C(17)-H(17A)   | 110.2(12)  |
| C(5)-C(17)-H(17B)   | 112.2(13)  |
| H(17A)-C(17)-H(17B) | 107.7(18)  |

|                     |           |
|---------------------|-----------|
| C(5)-C(17)-H(17C)   | 107.7(14) |
| H(17A)-C(17)-H(17C) | 108.8(19) |
| H(17B)-C(17)-H(17C) | 110(2)    |
| C(6)-C(18)-H(18A)   | 112.5(14) |
| C(6)-C(18)-H(18B)   | 110.9(15) |
| H(18A)-C(18)-H(18B) | 108(2)    |
| C(6)-C(18)-H(18C)   | 106.7(14) |
| H(18A)-C(18)-H(18C) | 111(2)    |
| H(18B)-C(18)-H(18C) | 108(2)    |
| C(11)-C(19)-H(19A)  | 105.5(16) |
| C(11)-C(19)-H(19B)  | 111.7(14) |
| H(19A)-C(19)-H(19B) | 110(2)    |
| C(11)-C(19)-H(19C)  | 111.1(13) |
| H(19A)-C(19)-H(19C) | 112(2)    |
| H(19B)-C(19)-H(19C) | 107.2(19) |

---

Table 4. Anisotropic displacement parameters ( $\text{\AA}^2 \times 10^3$ ) for cdv89. The anisotropic displacement factor exponent takes the form:  $-2\pi^2 [ h^2 a^{*2} U^{11} + \dots + 2 h k a^* b^* U^{12} ]$

|       | $U^{11}$ | $U^{22}$ | $U^{33}$ | $U^{23}$ | $U^{13}$ | $U^{12}$ |
|-------|----------|----------|----------|----------|----------|----------|
| O(1)  | 36(1)    | 26(1)    | 22(1)    | -2(1)    | -5(1)    | 22(1)    |
| O(2)  | 49(1)    | 19(1)    | 27(1)    | -4(1)    | -11(1)   | 15(1)    |
| C(1)  | 31(1)    | 23(1)    | 21(1)    | 1(1)     | -2(1)    | 18(1)    |
| C(2)  | 28(1)    | 22(1)    | 22(1)    | 5(1)     | 1(1)     | 14(1)    |
| C(3)  | 28(1)    | 23(1)    | 26(1)    | 4(1)     | 7(1)     | 13(1)    |
| C(4)  | 24(1)    | 20(1)    | 16(1)    | -2(1)    | -2(1)    | 12(1)    |
| C(5)  | 23(1)    | 25(1)    | 16(1)    | 0(1)     | -1(1)    | 14(1)    |
| C(6)  | 30(1)    | 28(1)    | 21(1)    | -2(1)    | -1(1)    | 19(1)    |
| C(7)  | 40(1)    | 30(1)    | 22(1)    | -4(1)    | -6(1)    | 24(1)    |
| C(8)  | 34(1)    | 23(1)    | 23(1)    | -1(1)    | -8(1)    | 17(1)    |
| C(9)  | 28(1)    | 20(1)    | 20(1)    | 0(1)     | -5(1)    | 14(1)    |
| C(10) | 28(1)    | 20(1)    | 22(1)    | 4(1)     | 0(1)     | 12(1)    |
| C(11) | 24(1)    | 23(1)    | 25(1)    | 5(1)     | 3(1)     | 11(1)    |
| C(12) | 34(1)    | 34(1)    | 26(1)    | 8(1)     | 11(1)    | 20(1)    |
| C(13) | 33(1)    | 32(1)    | 29(1)    | 5(1)     | 10(1)    | 20(1)    |
| C(14) | 26(1)    | 25(1)    | 22(1)    | 1(1)     | 1(1)     | 16(1)    |
| C(15) | 26(1)    | 20(1)    | 16(1)    | 0(1)     | -1(1)    | 13(1)    |
| C(16) | 37(1)    | 26(1)    | 25(1)    | -3(1)    | -6(1)    | 20(1)    |
| C(17) | 25(1)    | 30(1)    | 25(1)    | -1(1)    | -4(1)    | 14(1)    |
| C(18) | 35(1)    | 51(1)    | 31(1)    | -4(1)    | 3(1)     | 27(1)    |
| C(19) | 25(1)    | 28(1)    | 42(1)    | 4(1)     | -1(1)    | 10(1)    |

Table 5. Hydrogen coordinates ( $\times 10^4$ ) and isotropic displacement parameters ( $\text{\AA}^2 \times 10^3$ )

for cdv89.

|        | x        | y        | z        | U(eq) |
|--------|----------|----------|----------|-------|
| H(1)   | 6607(8)  | 6869(7)  | 6290(30) | 23(4) |
| H(2)   | 6722(9)  | 9815(9)  | 7040(40) | 34(6) |
| H(2A)  | 6085(9)  | 7170(8)  | 8210(40) | 32(5) |
| H(2B)  | 5594(8)  | 6700(8)  | 7160(30) | 29(5) |
| H(3A)  | 5282(8)  | 7209(8)  | 5920(30) | 23(4) |
| H(3B)  | 5509(8)  | 7455(8)  | 8200(30) | 29(5) |
| H(6A)  | 5719(7)  | 8268(7)  | 8850(30) | 17(4) |
| H(7A)  | 5642(8)  | 9131(8)  | 7220(30) | 30(5) |
| H(7B)  | 5927(7)  | 9100(7)  | 9390(30) | 26(5) |
| H(8A)  | 6566(8)  | 9054(7)  | 7420(30) | 26(5) |
| H(9A)  | 5925(7)  | 8961(7)  | 3910(30) | 17(4) |
| H(10A) | 6752(9)  | 9162(9)  | 2520(30) | 32(5) |
| H(10B) | 6274(8)  | 8628(8)  | 1650(30) | 28(5) |
| H(12A) | 6585(9)  | 8115(8)  | 830(40)  | 34(5) |
| H(12B) | 7197(9)  | 8512(8)  | 1040(30) | 32(5) |
| H(13A) | 7312(9)  | 7964(8)  | 3260(30) | 29(5) |
| H(13B) | 6866(8)  | 7540(8)  | 1920(40) | 32(5) |
| H(14A) | 6847(7)  | 7738(7)  | 6170(30) | 21(4) |
| H(16A) | 5719(9)  | 7174(9)  | 2630(40) | 40(6) |
| H(16B) | 5564(9)  | 6585(10) | 3190(40) | 40(6) |
| H(16C) | 6019(9)  | 6892(8)  | 1840(40) | 33(5) |
| H(17A) | 5111(8)  | 8244(8)  | 3690(30) | 28(5) |
| H(17B) | 4978(9)  | 7694(9)  | 4490(30) | 37(5) |
| H(17C) | 5380(10) | 7956(10) | 2570(40) | 44(6) |
| H(18A) | 4808(9)  | 7772(10) | 8160(40) | 39(5) |
| H(18B) | 4824(10) | 8277(10) | 7220(40) | 48(6) |
| H(18C) | 4963(9)  | 8270(10) | 9660(40) | 44(6) |
| H(19A) | 7482(11) | 9121(11) | 3930(40) | 49(7) |
| H(19B) | 7431(9)  | 8684(9)  | 5410(40) | 42(6) |
| H(19C) | 7196(8)  | 9026(8)  | 6160(40) | 33(5) |

Table 6. Torsion angles [°] for cdv89.

---

|                        |             |
|------------------------|-------------|
| O(1)-C(1)-C(2)-C(3)    | -175.85(13) |
| C(16)-C(1)-C(2)-C(3)   | -60.15(17)  |
| C(14)-C(1)-C(2)-C(3)   | 64.06(16)   |
| C(1)-C(2)-C(3)-C(4)    | -40.08(18)  |
| C(2)-C(3)-C(4)-C(15)   | 4.9(2)      |
| C(2)-C(3)-C(4)-C(5)    | -179.85(13) |
| C(15)-C(4)-C(5)-C(17)  | 110.70(16)  |
| C(3)-C(4)-C(5)-C(17)   | -64.48(16)  |
| C(15)-C(4)-C(5)-C(9)   | -10.1(2)    |
| C(3)-C(4)-C(5)-C(9)    | 174.77(12)  |
| C(15)-C(4)-C(5)-C(6)   | -124.96(15) |
| C(3)-C(4)-C(5)-C(6)    | 59.86(17)   |
| C(4)-C(5)-C(6)-C(18)   | -109.94(15) |
| C(17)-C(5)-C(6)-C(18)  | 12.03(19)   |
| C(9)-C(5)-C(6)-C(18)   | 130.07(15)  |
| C(4)-C(5)-C(6)-C(7)    | 124.21(13)  |
| C(17)-C(5)-C(6)-C(7)   | -113.82(14) |
| C(9)-C(5)-C(6)-C(7)    | 4.23(15)    |
| C(18)-C(6)-C(7)-C(8)   | -159.23(13) |
| C(5)-C(6)-C(7)-C(8)    | -30.96(15)  |
| C(6)-C(7)-C(8)-O(2)    | 165.63(13)  |
| C(6)-C(7)-C(8)-C(9)    | 46.42(14)   |
| O(2)-C(8)-C(9)-C(10)   | 63.57(17)   |
| C(7)-C(8)-C(9)-C(10)   | -173.09(12) |
| O(2)-C(8)-C(9)-C(5)    | -167.41(12) |
| C(7)-C(8)-C(9)-C(5)    | -44.07(13)  |
| C(4)-C(5)-C(9)-C(8)    | -94.67(14)  |
| C(17)-C(5)-C(9)-C(8)   | 144.77(12)  |
| C(6)-C(5)-C(9)-C(8)    | 24.16(14)   |
| C(4)-C(5)-C(9)-C(10)   | 36.34(17)   |
| C(17)-C(5)-C(9)-C(10)  | -84.22(15)  |
| C(6)-C(5)-C(9)-C(10)   | 155.17(12)  |
| C(8)-C(9)-C(10)-C(11)  | 72.12(17)   |
| C(5)-C(9)-C(10)-C(11)  | -51.75(17)  |
| C(9)-C(10)-C(11)-C(15) | 37.25(18)   |
| C(9)-C(10)-C(11)-C(19) | -88.00(16)  |

|                         |             |
|-------------------------|-------------|
| C(9)-C(10)-C(11)-C(12)  | 148.87(13)  |
| C(15)-C(11)-C(12)-C(13) | -39.98(16)  |
| C(10)-C(11)-C(12)-C(13) | -158.46(14) |
| C(19)-C(11)-C(12)-C(13) | 76.73(16)   |
| C(11)-C(12)-C(13)-C(14) | 27.72(17)   |
| O(1)-C(1)-C(14)-C(15)   | -172.42(12) |
| C(16)-C(1)-C(14)-C(15)  | 69.72(16)   |
| C(2)-C(1)-C(14)-C(15)   | -53.07(15)  |
| O(1)-C(1)-C(14)-C(13)   | 68.15(16)   |
| C(16)-C(1)-C(14)-C(13)  | -49.71(18)  |
| C(2)-C(1)-C(14)-C(13)   | -172.50(13) |
| C(12)-C(13)-C(14)-C(15) | -3.95(17)   |
| C(12)-C(13)-C(14)-C(1)  | 119.00(15)  |
| C(3)-C(4)-C(15)-C(11)   | 172.65(14)  |
| C(5)-C(4)-C(15)-C(11)   | -2.3(2)     |
| C(3)-C(4)-C(15)-C(14)   | 4.6(2)      |
| C(5)-C(4)-C(15)-C(14)   | -170.44(13) |
| C(10)-C(11)-C(15)-C(4)  | -11.3(2)    |
| C(19)-C(11)-C(15)-C(4)  | 114.19(17)  |
| C(12)-C(11)-C(15)-C(4)  | -131.11(16) |
| C(10)-C(11)-C(15)-C(14) | 158.37(12)  |
| C(19)-C(11)-C(15)-C(14) | -76.15(16)  |
| C(12)-C(11)-C(15)-C(14) | 38.55(15)   |
| C(1)-C(14)-C(15)-C(4)   | 21.0(2)     |
| C(13)-C(14)-C(15)-C(4)  | 147.80(15)  |
| C(1)-C(14)-C(15)-C(11)  | -148.89(12) |
| C(13)-C(14)-C(15)-C(11) | -22.11(16)  |

---

Table 7. Hydrogen bonds for cdv89 [ $\text{\AA}$  and  $^\circ$ ].

| D-H...A            | d(D-H)  | d(H...A) | d(D...A)   | $\angle(\text{DHA})$ |
|--------------------|---------|----------|------------|----------------------|
| O(1)-H(1)...O(1)#1 | 0.90(2) | 1.86(2)  | 2.7494(12) | 168.3(18)            |
| O(2)-H(2)...O(2)#2 | 0.76(3) | 1.89(3)  | 2.6416(12) | 169(2)               |

Symmetry transformations used to generate equivalent atoms:

#1  $-x+y+2/3, -x+4/3, z+1/3$  #2  $-y+5/3, x-y+4/3, z+1/3$

*Cartesian coordinates for lowest energy conformer of 78 optimized at HF/3-21G*

|   |           |           |           |
|---|-----------|-----------|-----------|
| C | 0.712290  | 0.212055  | -0.256925 |
| C | -0.430796 | -0.695766 | 1.942692  |
| C | 1.982721  | -0.185822 | 1.971342  |
| C | 0.702918  | -0.185510 | 2.829970  |
| C | 1.873739  | 0.656141  | 0.677644  |
| C | -0.520378 | 0.137606  | 0.666366  |
| C | -1.898414 | -0.190947 | 0.067627  |
| C | -2.754855 | 0.013231  | 1.349082  |
| C | -1.892920 | -0.627454 | 2.497805  |
| C | 0.462168  | 1.183020  | 3.478896  |
| C | 0.990237  | -1.137926 | -1.008791 |
| C | 0.431448  | -1.213117 | -2.470140 |
| C | -0.702250 | -0.255346 | -2.920166 |
| C | -0.924058 | 0.967986  | -2.021420 |
| C | -2.139493 | 0.823204  | -1.062616 |
| C | 0.366908  | 1.347867  | -1.267926 |
| C | 2.483367  | -1.537394 | -1.116979 |
| C | 1.502404  | 1.736241  | -2.227987 |
| C | -2.138628 | -1.648858 | -0.382662 |
| H | -0.179842 | -1.725937 | 1.726173  |
| H | -0.638927 | 1.158236  | 0.998329  |
| O | 0.837797  | -1.184877 | 3.876632  |
| O | 0.091022  | 2.532264  | -0.458463 |
| O | -0.352539 | 0.296263  | -4.225334 |
| H | 2.197956  | -1.221449 | 1.742517  |
| H | 2.811823  | 0.191463  | 2.566628  |
| H | 2.823325  | 0.624669  | 0.160738  |
| H | 1.686684  | 1.687650  | 0.936970  |
| H | -3.736030 | -0.440109 | 1.275241  |
| H | -2.881067 | 1.074296  | 1.533130  |
| H | -2.249449 | -1.618779 | 2.741577  |
| H | -1.952922 | -0.032498 | 3.396363  |
| H | -0.357445 | 1.121326  | 4.181148  |
| H | 0.248440  | 1.950483  | 2.749870  |
| H | 1.349835  | 1.483174  | 4.029672  |
| H | 0.511142  | -1.913426 | -0.430219 |
| H | 0.136822  | -2.240612 | -2.660430 |
| H | 1.252626  | -1.007101 | -3.142088 |
| H | -1.635058 | -0.792854 | -3.019427 |
| H | -1.156632 | 1.770562  | -2.713036 |
| H | -2.306950 | 1.794407  | -0.614894 |
| H | -3.020785 | 0.568746  | -1.644917 |
| H | 2.559908  | -2.473947 | -1.661443 |
| H | 3.050091  | -0.790061 | -1.658974 |
| H | 2.942273  | -1.684729 | -0.150929 |
| H | 1.792925  | 0.935398  | -2.882292 |



|   |           |           |           |
|---|-----------|-----------|-----------|
| H | 1.168811  | 2.553379  | -2.860031 |
| H | 2.357370  | 2.073443  | -1.657428 |
| H | -3.178339 | -1.748698 | -0.680977 |
| H | -1.528661 | -1.954373 | -1.213295 |
| H | -1.964470 | -2.341090 | 0.431327  |
| H | 1.535531  | -0.928336 | 4.495387  |
| H | -0.045996 | 3.296446  | -1.034274 |
| H | -0.275679 | -0.412540 | -4.879062 |

wB97X-D/6-311+G(2DF,2P) [6-311G\*] = -968.0016618 hartrees

*Cartesian coordinates for lowest energy conformer of 79 optimized at HF/3-21G*

|    |           |           |           |
|----|-----------|-----------|-----------|
| C  | -0.303169 | 0.699692  | -0.305893 |
| C  | 0.476866  | -0.370139 | 1.979281  |
| C  | -0.122397 | 2.020105  | 1.916426  |
| C  | -0.145246 | 0.757571  | 2.799546  |
| C  | -0.865284 | 1.855748  | 0.569110  |
| C  | -0.232833 | -0.519327 | 0.633992  |
| C  | 0.240343  | -1.879674 | 0.090400  |
| C  | -0.045043 | -2.736423 | 1.356300  |
| C  | 0.418117  | -1.825313 | 2.552399  |
| C  | -1.548678 | 0.474952  | 3.348868  |
| C  | -1.280993 | 0.298910  | -1.458689 |
| C  | -0.769601 | -0.998332 | -2.121028 |
| C  | -0.626401 | -2.197462 | -1.138588 |
| C  | 1.105421  | 1.047548  | -0.928825 |
| C  | 1.402649  | 0.444611  | -2.343092 |
| C  | 0.532822  | -0.705789 | -2.897949 |
| C  | -1.569783 | 1.406745  | -2.483965 |
| Cl | -2.987877 | -0.096861 | -0.788575 |
| C  | 1.419864  | 2.560541  | -1.051145 |
| C  | 1.749758  | -2.036813 | -0.198573 |
| O  | 0.218820  | -0.268465 | -4.251303 |
| O  | 0.766811  | 0.948923  | 3.913923  |
| H  | 1.511070  | -0.082736 | 1.846259  |
| H  | -1.265971 | -0.708814 | 0.893238  |
| H  | -1.507588 | -1.290665 | -2.860329 |
| H  | 0.919120  | 2.266915  | 1.759784  |
| H  | -0.571237 | 2.846961  | 2.462291  |
| H  | -1.904654 | 1.645331  | 0.775551  |
| H  | -0.837768 | 2.794266  | 0.033865  |
| H  | 0.474895  | -3.686385 | 1.344090  |
| H  | -1.109101 | -2.930087 | 1.431588  |
| H  | 1.390393  | -2.126394 | 2.916633  |
| H  | -0.275089 | -1.901620 | 3.376046  |
| H  | -1.930358 | 1.364137  | 3.843523  |
| H  | -2.248794 | 0.201341  | 2.573298  |
| H  | -1.504941 | -0.318479 | 4.081777  |
| H  | -1.619210 | -2.467666 | -0.803068 |
| H  | -0.229060 | -3.045691 | -1.689376 |

|   |           |           |           |
|---|-----------|-----------|-----------|
| H | 1.832372  | 0.644260  | -0.239852 |
| H | 2.445334  | 0.150982  | -2.370505 |
| H | 1.302566  | 1.227527  | -3.078842 |
| H | 1.107447  | -1.620469 | -2.959087 |
| H | -0.685230 | 1.677801  | -3.030248 |
| H | -1.976659 | 2.276359  | -1.987420 |
| H | -2.298765 | 1.052303  | -3.199586 |
| H | 1.432439  | 3.062069  | -0.095476 |
| H | 0.708523  | 3.059876  | -1.696702 |
| H | 2.405476  | 2.675348  | -1.491604 |
| H | 2.341784  | -1.812734 | 0.679252  |
| H | 2.105586  | -1.423847 | -1.005606 |
| H | 1.937968  | -3.073263 | -0.462946 |
| H | -0.218872 | -0.975215 | -4.744823 |
| H | 0.434158  | 1.637840  | 4.505659  |

wB97X-D/6-311+G(2DF,2P) [6-311G\*] = -1353.3907037 hartrees

*Cartesian coordinates for lowest energy conformer of **80** optimized at HF/3-21G*

|   |           |           |           |
|---|-----------|-----------|-----------|
| C | -0.721238 | -0.092673 | 0.041788  |
| C | 0.020449  | 0.981721  | 2.205998  |
| C | -2.386543 | 0.694578  | 1.830536  |
| C | -1.268315 | 0.454157  | 2.844791  |
| C | -2.168072 | -0.108818 | 0.536749  |
| C | 0.231982  | 0.391465  | 0.816076  |
| C | 1.720335  | 0.318785  | 0.553560  |
| C | 2.245272  | -0.089022 | 1.956065  |
| C | 1.363171  | 0.705305  | 2.959819  |
| C | -0.450354 | -0.766277 | -1.312957 |
| C | 1.062911  | -0.720011 | -1.713996 |
| C | 2.029090  | -0.735920 | -0.517012 |
| C | 2.278897  | 1.719962  | 0.213861  |
| C | -1.152256 | 0.051963  | -2.452122 |
| C | -0.126489 | 1.167309  | -2.739810 |
| C | 1.233927  | 0.454817  | -2.708699 |
| C | -0.918723 | -2.237861 | -1.232921 |
| C | -1.444910 | -0.760472 | -3.728736 |
| C | -1.200042 | -1.015369 | 3.272849  |
| O | -1.631831 | 1.275824  | 3.983065  |
| O | 1.545349  | -0.163980 | -3.989598 |
| H | -0.121295 | 2.053496  | 2.124754  |
| H | -2.410497 | 1.756542  | 1.618351  |
| H | -3.333766 | 0.429110  | 2.284172  |
| H | -2.833142 | 0.274694  | -0.226820 |
| H | -2.460326 | -1.138904 | 0.709639  |
| H | 3.301945  | 0.117857  | 2.077401  |
| H | 2.082853  | -1.151538 | 2.097406  |
| H | 1.838731  | 1.639265  | 3.228561  |
| H | 1.216504  | 0.141647  | 3.871400  |
| H | 1.273492  | -1.597448 | -2.309323 |

|   |           |           |           |
|---|-----------|-----------|-----------|
| H | 3.049327  | -0.631283 | -0.873838 |
| H | 1.952667  | -1.713822 | -0.052041 |
| H | 1.781343  | 2.151246  | -0.641850 |
| H | 3.342543  | 1.657359  | 0.005335  |
| H | 2.140461  | 2.397371  | 1.047319  |
| H | -2.081839 | 0.474623  | -2.099160 |
| H | -0.161554 | 1.901772  | -1.944851 |
| H | -0.306990 | 1.670701  | -3.683025 |
| H | 2.042944  | 1.116286  | -2.438604 |
| H | -1.991460 | -2.312481 | -1.106193 |
| H | -0.440772 | -2.729035 | -0.391853 |
| H | -0.650234 | -2.772245 | -2.134487 |
| H | -1.893196 | -0.105528 | -4.470612 |
| H | -0.531483 | -1.158241 | -4.142144 |
| H | -2.145003 | -1.564634 | -3.538495 |
| H | -0.497135 | -1.150953 | 4.087005  |
| H | -0.894509 | -1.648558 | 2.452603  |
| H | -2.176116 | -1.328126 | 3.624244  |
| H | -0.973727 | 1.186321  | 4.685800  |
| H | 1.617623  | 0.509025  | -4.679999 |

wB97X-D/6-311+G(2DF,2P) [6-311G\*] = -892.2940182 hartrees

*Cartesian coordinates for lowest energy conformer of 81 optimized at HF/3-21G*

|    |           |           |           |
|----|-----------|-----------|-----------|
| C  | 0.657626  | 0.200745  | -0.377015 |
| C  | -0.421871 | -0.701693 | 1.817323  |
| C  | 1.686787  | 0.611416  | 1.986348  |
| C  | 0.374327  | 0.248952  | 2.716505  |
| C  | 1.513606  | 1.129147  | 0.532682  |
| C  | -0.608869 | -0.048906 | 0.447397  |
| C  | -1.862685 | -0.686112 | -0.178845 |
| C  | -2.792368 | -0.617313 | 1.066944  |
| C  | -1.879927 | -1.055800 | 2.257801  |
| C  | -0.378197 | 1.510421  | 3.161757  |
| C  | -1.759101 | -2.171036 | -0.592050 |
| C  | -2.317367 | 0.186728  | -1.382864 |
| C  | -1.306649 | 1.293303  | -1.788875 |
| C  | 0.195506  | 0.914303  | -1.726268 |
| C  | 1.416523  | -1.110083 | -0.857345 |
| C  | 1.656021  | -0.912402 | -2.369020 |
| C  | 0.406978  | -0.172851 | -2.822906 |
| C  | 2.729292  | -1.525750 | -0.167524 |
| O  | 0.696607  | -0.540185 | 3.892940  |
| O  | 0.421238  | 0.346848  | -4.160293 |
| Cl | -1.684217 | 2.834168  | -0.830181 |
| C  | 1.049836  | 2.136501  | -2.115848 |
| H  | -0.959027 | 0.946941  | 0.673688  |
| H  | 0.167246  | -1.607059 | 1.749408  |
| H  | 2.300501  | -0.273192 | 2.008777  |
| H  | 2.208921  | 1.376237  | 2.557396  |

|   |           |           |           |
|---|-----------|-----------|-----------|
| H | 1.022651  | 2.092359  | 0.578428  |
| H | 2.495528  | 1.296465  | 0.107744  |
| H | -3.668165 | -1.247164 | 0.966448  |
| H | -3.120723 | 0.405852  | 1.210864  |
| H | -1.965662 | -2.120989 | 2.425089  |
| H | -2.160755 | -0.564100 | 3.176308  |
| H | 0.271776  | 2.105180  | 3.798007  |
| H | -1.252756 | 1.246409  | 3.739346  |
| H | -0.678437 | 2.129758  | 2.329591  |
| H | -2.756422 | -2.543355 | -0.806595 |
| H | -1.343122 | -2.777269 | 0.202681  |
| H | -1.163405 | -2.319105 | -1.480943 |
| H | -2.469887 | -0.438646 | -2.254868 |
| H | -3.266872 | 0.661730  | -1.176078 |
| H | -1.507208 | 1.592436  | -2.805608 |
| H | 0.730277  | -1.933863 | -0.745904 |
| H | 1.789826  | -1.853430 | -2.888237 |
| H | 2.540895  | -0.303898 | -2.531999 |
| H | -0.418127 | -0.862606 | -2.815511 |
| H | 3.176587  | -2.335269 | -0.736693 |
| H | 2.566243  | -1.890993 | 0.835987  |
| H | 3.443694  | -0.713041 | -0.134662 |
| H | 1.171682  | -0.000964 | 4.540122  |
| H | 1.276976  | 0.742365  | -4.368070 |
| H | 0.713590  | 2.515855  | -3.071836 |
| H | 0.964196  | 2.933296  | -1.396162 |
| H | 2.096888  | 1.869660  | -2.197382 |

wB97X-D/6-311+G(2DF,2P) [6-311G\*] = -1353.0854026 hartrees

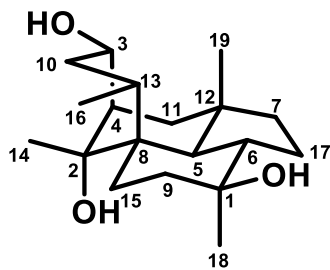

**Table S1.** Isolated experimental and calculated  $^{13}\text{C}$  chemical shifts for **78**. Carbons are numbered according to structural assignment performed *via* 2D-NMR analysis.

| Carbon | Isolated Exp. | $\omega\text{B97X-D/6-31G}^*$ | $\Delta$ | $ \Delta $ |
|--------|---------------|-------------------------------|----------|------------|
| 1      | 73.9          | 76.4                          | 2.5      | 2.5        |
| 2      | 73.8          | 78.5                          | 4.7      | 4.7        |
| 3      | 72.2          | 74.8                          | 2.6      | 2.6        |
| 4      | 52.3          | 50.0                          | -2.3     | 2.3        |
| 5      | 50.2          | 48.3                          | -1.9     | 1.9        |
| 6      | 43.4          | 43.3                          | -0.1     | 0.1        |
| 7      | 41.2          | 42.1                          | 0.9      | 0.9        |
| 8      | 41.1          | 41.6                          | 0.5      | 0.5        |
| 9      | 41.1          | 39.2                          | -1.9     | 1.9        |
| 10     | 40.8          | 39.7                          | -1.1     | 1.1        |
| 11     | 40.7          | 37.9                          | -2.8     | 2.8        |
| 12     | 38.9          | 39.2                          | 0.3      | 0.3        |
| 13     | 27.1          | 27.7                          | 0.6      | 0.6        |
| 14     | 25.8          | 24.5                          | -1.3     | 1.3        |
| 15     | 24.8          | 25.1                          | 0.3      | 0.3        |
| 16     | 21.9          | 20.7                          | -1.2     | 1.2        |
| 17     | 21.6          | 22.9                          | 1.3      | 1.3        |
| 18     | 20.6          | 19.1                          | -1.5     | 1.5        |
| 19     | 19.8          | 18.0                          | -1.8     | 1.8        |

**AVERAGE  $|\Delta|$ :** 1.6

**MAX  $|\Delta|$ :** 4.7

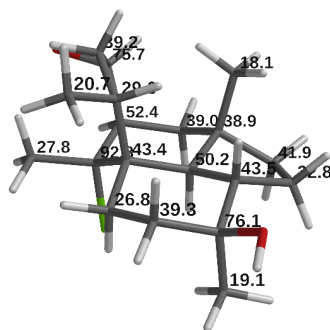

**Table S2.** Isolated experimental and calculated  $^{13}\text{C}$  chemical shifts for **79**. Carbons are numbered according to decreasing chemical shift.

| Carbon | Isolated Exp. | $\omega\text{B97X-D/6-31G}^*$ | $\Delta$ | $ \Delta $ |
|--------|---------------|-------------------------------|----------|------------|
| 1      | 86.2          | 92.8                          | 6.6      | 6.6        |
| 2      | 73.9          | 76.1                          | 2.2      | 2.2        |
| 3      | 72.5          | 75.7                          | 3.2      | 3.2        |
| 4      | 54.7          | 52.4                          | -2.3     | 2.3        |
| 5      | 52.0          | 50.2                          | -1.8     | 1.8        |
| 6      | 44.2          | 43.5                          | -0.7     | 0.7        |
| 7      | 43.3          | 43.4                          | 0.1      | 0.1        |
| 8      | 42.5          | 41.9                          | -0.6     | 0.6        |
| 9      | 42.0          | 39.3                          | -2.7     | 2.7        |
| 10     | 41.0          | 39.2                          | -1.8     | 1.8        |
| 11     | 40.6          | 39.0                          | -1.6     | 1.6        |
| 12     | 38.9          | 38.9                          | 0.0      | 0.0        |
| 13     | 28.5          | 29.0                          | 0.5      | 0.5        |
| 14     | 27.8          | 27.8                          | 0.0      | 0.0        |
| 15     | 27.0          | 26.8                          | -0.2     | 0.2        |
| 16     | 22.2          | 22.8                          | 0.6      | 0.6        |
| 17     | 21.6          | 20.7                          | -0.9     | 0.9        |
| 18     | 20.6          | 19.1                          | -1.5     | 1.5        |
| 19     | 19.5          | 18.1                          | -1.4     | 1.4        |

**AVERAGE  $|\Delta|$ :** 1.5

**MAX  $|\Delta|$ :** 6.6

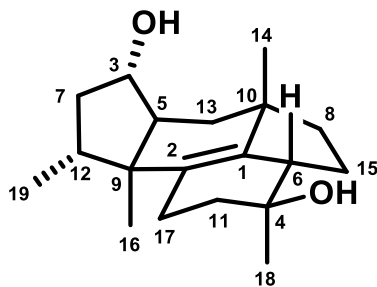

**Table S3.** Isolated experimental and calculated  $^{13}\text{C}$  chemical shifts for **80**. Carbons are numbered according to structural assignment performed *via* 2D-NMR analysis.

| Carbon | Isolated Exp. | $\omega\text{B97X-D/6-31G}^*$ | $\Delta$ | $ \Delta $ |
|--------|---------------|-------------------------------|----------|------------|
| 1      | 138.2         | 140.9                         | 2.7      | 2.7        |
| 2      | 131.4         | 128.8                         | -2.6     | 2.6        |
| 3      | 73.3          | 80.8                          | 7.5      | 7.5        |
| 4      | 72.3          | 74.2                          | 1.9      | 1.9        |
| 5      | 56.1          | 55.0                          | -1.1     | 1.1        |
| 6      | 47.9          | 48.2                          | 0.3      | 0.3        |
| 7      | 43.8          | 39.6                          | -4.2     | 4.2        |
| 8      | 43.6          | 41.1                          | -2.5     | 2.5        |
| 9      | 42.9          | 47.5                          | 4.6      | 4.6        |
| 10     | 40.6          | 41.2                          | 0.6      | 0.6        |
| 11     | 38.8          | 37.1                          | -1.7     | 1.7        |
| 12     | 38.1          | 41.0                          | 2.9      | 2.9        |
| 13     | 33.7          | 35.1                          | 1.4      | 1.4        |
| 14     | 25.8          | 25.0                          | -0.8     | 0.8        |
| 15     | 24.1          | 23.3                          | -0.8     | 0.8        |
| 16     | 22.4          | 22.9                          | 0.5      | 0.5        |
| 17     | 21.9          | 25.3                          | 3.5      | 3.5        |
| 18     | 19.5          | 19.3                          | -0.2     | 0.2        |
| 19     | 17.6          | 16.0                          | -1.6     | 1.6        |

**AVERAGE  $|\Delta|$ :** 2.2

**MAX  $|\Delta|$ :** 7.5

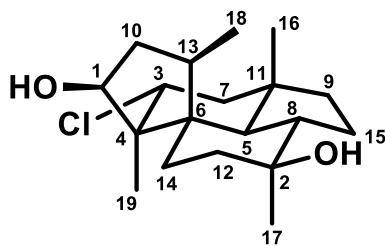

**Table S4.** Isolated experimental and calculated  $^{13}\text{C}$  chemical shifts for **81**. Carbons are numbered according to structural assignment performed *via* 2D-NMR analysis.

| Carbon | Isolated Exp. | $\omega\text{B97X-D/6-31G}^*$ | $\Delta$ | $ \Delta $ |
|--------|---------------|-------------------------------|----------|------------|
| 1      | 75.3          | 76.0                          | 0.7      | 0.7        |
| 2      | 74.2          | 77.2                          | 3.0      | 3.0        |
| 3      | 66.2          | 71.6                          | 5.4      | 5.4        |
| 4      | 57.5          | 54.5                          | -3.0     | 3.0        |
| 5      | 51.2          | 48.6                          | -2.6     | 2.6        |
| 6      | 49.4          | 45.2                          | -4.2     | 4.2        |
| 7      | 46.6          | 40.4                          | -6.2     | 6.2        |
| 8      | 44.5          | 42.6                          | -1.9     | 1.9        |
| 9      | 43.3          | 43.7                          | 0.4      | 0.4        |
| 10     | 42.8          | 39.7                          | -3.1     | 3.1        |
| 11     | 42.0          | 38.5                          | -3.5     | 3.5        |
| 12     | 40.8          | 38.6                          | -2.2     | 2.2        |
| 13     | 35.9          | 32.8                          | -3.1     | 3.1        |
| 14     | 27.8          | 30.4                          | 2.6      | 2.6        |
| 15     | 21.5          | 23.2                          | 1.7      | 1.7        |
| 16     | 20.8          | 22.9                          | 2.1      | 2.1        |
| 17     | 20.3          | 19.6                          | -0.7     | 0.7        |
| 18     | 19.8          | 17.4                          | -2.4     | 2.4        |
| 19     | 9.3           | 15.6                          | 6.3      | 6.3        |

**AVERAGE  $|\Delta|$ :** 2.9

**MAX  $|\Delta|$ :** 6.3



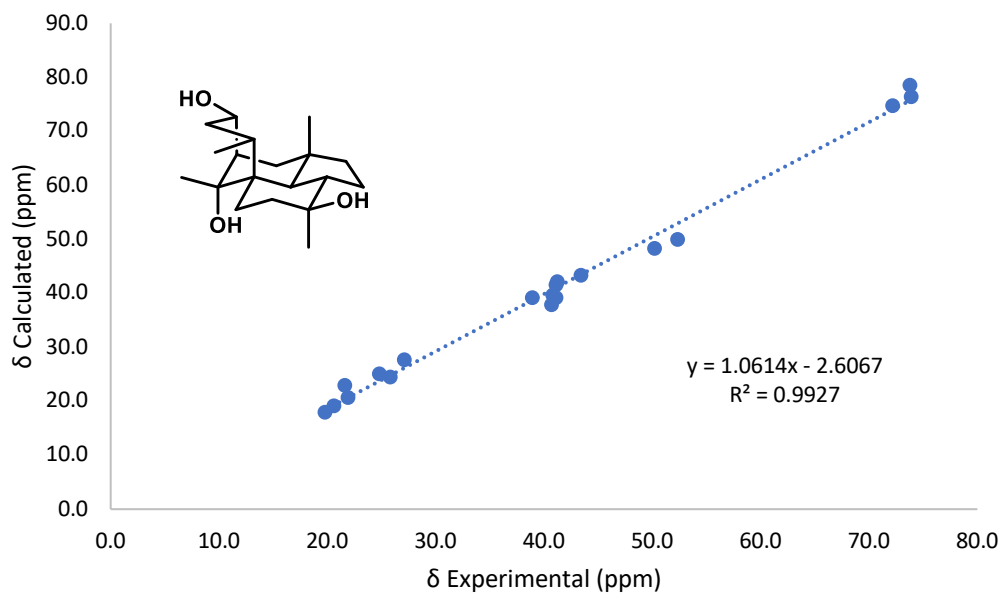

**Figure S3.** Linear correlation plot for **78** based on data from Table S1.

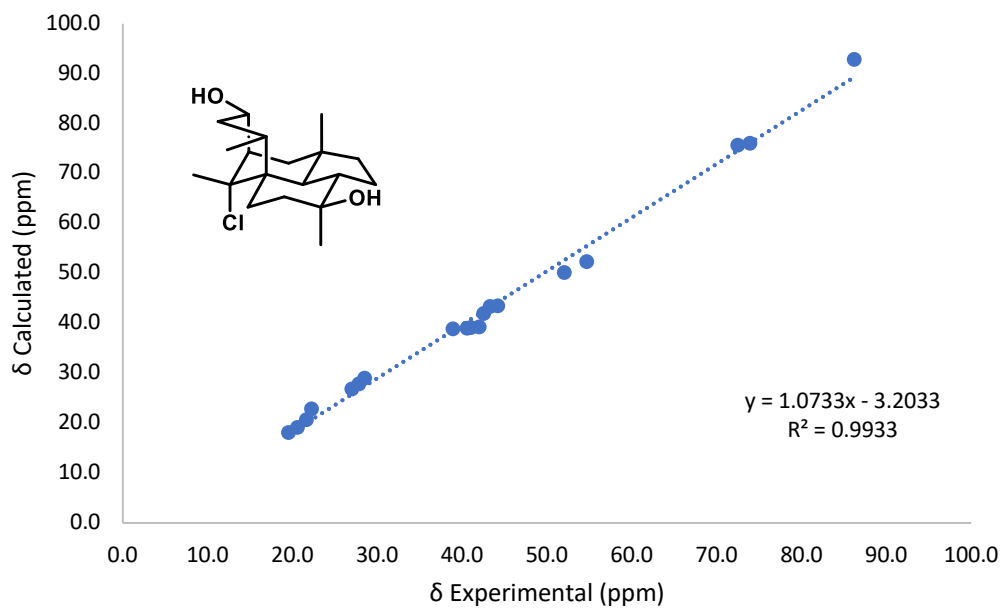

**Figure S4.** Linear correlation plot for **79** based on data from Table S2.

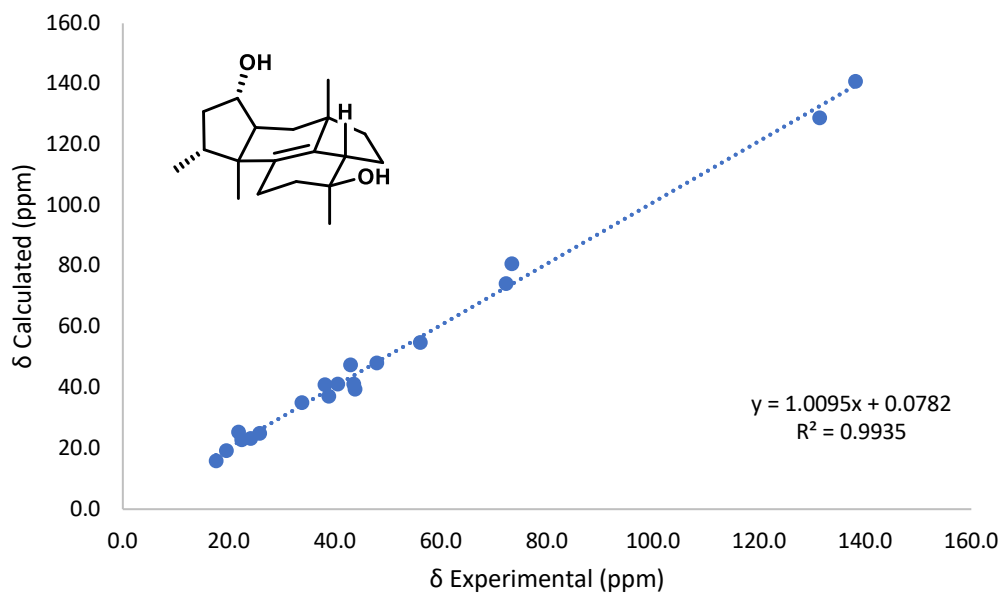

**Figure S5.** Linear correlation plot for **80** based on data from Table **S3**.

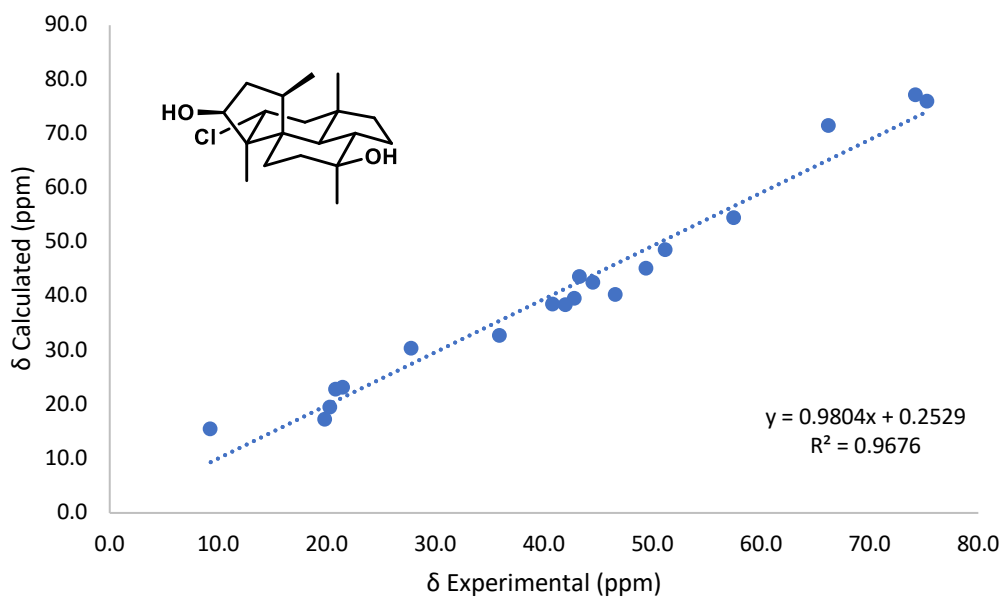

**Figure S6.** Linear correlation plot for **81** based on data from Table **S4**.

Current Data Parameters  
NAME MG 1-1 dest Fr. 4  
EXPNO 1  
PROCNO 1

F2 - Acquisition Parameters

Date\_ 20170310  
Time 19.16  
INSTRUM cryo500  
PROBHD 5 mm CPTCI 1H-  
PULPROG zg30  
TD 32048  
SOLVENT CDCl3  
NS 8  
DS 0  
SWH 8012.820 Hz  
FIDRES 0.250026 Hz  
AQ 1.9997952 sec  
RG 3.6  
DW 62.400 usec  
DE 6.00 usec  
TE 298.0 K  
D1 0.10000000 sec  
MCREST 0 sec  
MCWRK 0.01500000 sec

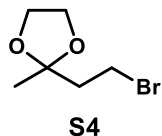

==== CHANNEL f1 =====

NUC1 1H  
P1 7.50 usec  
PL1 1.60 dB  
SFO1 500.2235015 MHz

F2 - Processing parameters

SI 65536  
SF 500.2200317 MHz  
WDW EM  
SSB 0  
LB 0.30 Hz  
GB 0  
PC 1.00

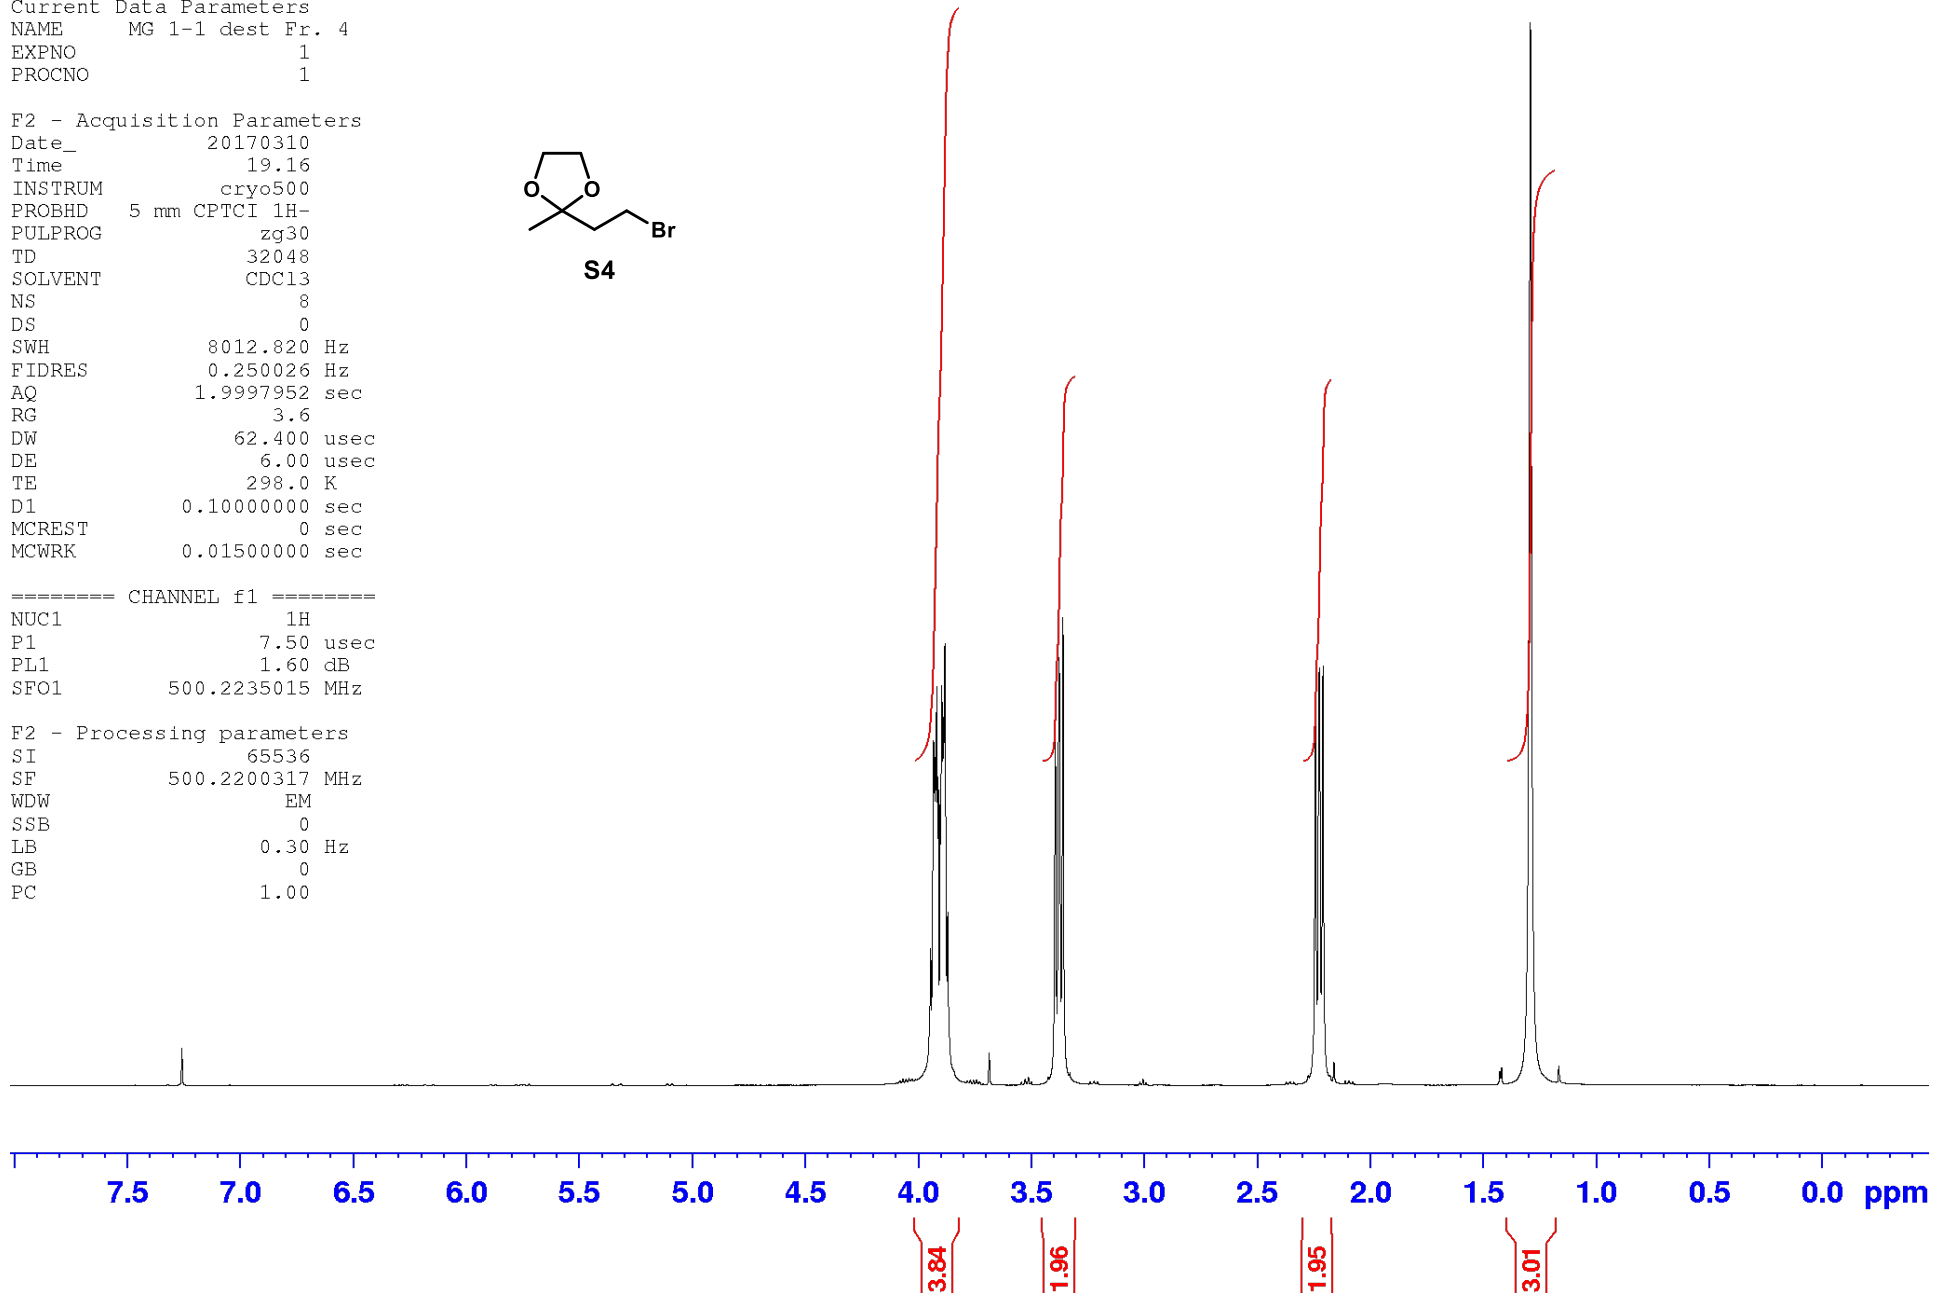

Current Data Parameters  
NAME MG 1-1 dest Fr. 4  
EXPNO 2  
PROCNO 1

F2 - Acquisition Parameters  
Date\_ 20170310  
Time 19.20  
INSTRUM cryo500  
PROBHD 5 mm CPTCI 1H-  
PULPROG deptqgppsp  
TD 65536  
SOLVENT cdcl3  
NS 329  
DS 8  
SWH 30303.031 Hz  
FIDRES 0.462388 Hz  
AQ 1.0813440 sec  
RG 2048  
DW 16.500 usec  
DE 6.00 usec  
TE 298.0 K  
CNST2 145.0000000  
CNST12 1.5000000  
D1 1.00000000 sec  
d2 0.00344828 sec  
d12 0.00002000 sec  
D16 0.00020000 sec  
DELTA 0.00001707 sec  
DELTA1 0.00228023 sec  
DELTA2 0.00226483 sec  
DELTA3 0.00224828 sec  
MCFEST 0 sec  
MCWRK 0.01500000 sec

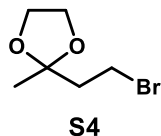

109.09  
64.85  
42.84  
26.96  
24.10

===== CHANNEL f1 =====  
NUC1 13C  
P1 16.55 usec  
P12 2000.00 usec  
P10 120.00 dB  
PL1 -1.00 dB  
SFO1 125.7942548 MHz  
SP2 2.70 dB  
SPNAM[2] Crp60comp.4  
SPOFF2 0 Hz

===== CHANNEL f2 =====  
CPDPRG[2] waltz16  
NUC2 1H  
p0 11.55 usec  
P3 7.70 usec  
p4 15.40 usec  
PCPD2 100.00 usec  
PL2 1.60 dB  
PL12 24.50 dB  
SFO2 500.2225011 MHz

===== GRADIENT CHANNEL =====  
GPNAM[1] SINE.100  
GPNAM[2] SINE.100  
GPNAM[3] SINE.100  
GPX1 0 %  
GPX2 0 %  
GPX3 0 %  
GPI1 0 %  
GPY2 0 %  
GPY3 0 %  
GPZ1 31.00 %  
GPZ2 31.00 %  
GPZ3 31.00 %  
P16 1000.00 usec

F2 - Processing parameters  
SI 65536  
SF 125.7804165 MHz  
WDW EM  
SSE 0  
LB 1.00 Hz  
GB 0  
PC 2.00

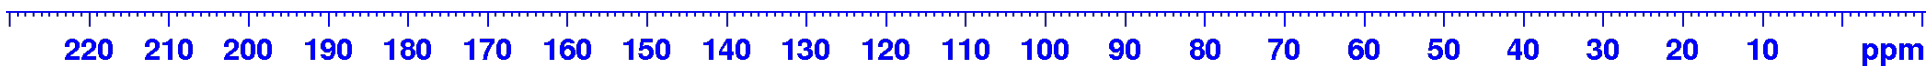

2.88  
2.87  
2.86  
2.86  
2.85  
2.85  
2.84  
2.84  
2.47  
2.46  
2.46  
2.45  
2.44  
2.44  
2.43  
2.43  
2.43  
2.42  
2.42  
2.41  
2.40  
2.40  
2.30  
2.28  
2.26  
2.25  
2.25  
2.24  
2.23  
2.23  
2.22  
2.20  
2.19  
2.16  
2.16  
2.14  
2.13  
2.13  
2.12  
2.10  
2.10  
2.07  
2.05  
2.05  
2.04  
2.04  
2.03  
2.02  
2.02  
2.01  
2.01  
2.00  
2.00  
1.99  
1.99  
1.97  
1.97  
1.96  
1.96  
1.95  
1.95  
1.78  
1.76  
1.76  
1.75  
1.75  
1.74  
1.74  
1.73  
1.73  
1.72  
1.50  
1.48  
1.48  
1.46  
1.46  
1.44  
1.44  
1.42  
1.42  
1.29  
1.28  
1.27  
1.26  
1.24  
1.23  
1.22  
1.21

Current Data Parameters  
 NAME JC 1-259 hydrinenone  
 EXPNO 1  
 PROCNO 1

F2 - Acquisition Parameters  
 Date\_ 20160819  
 Time 14.16  
 INSTRUM cryo500  
 PROBHD 5 mm CPTCI 1H-  
 PULPROG zg30  
 TD 81728  
 SOLVENT CDCl3  
 NS 4  
 DS 2  
 SWH 8012.820 Hz  
 FIDRES 0.098043 Hz  
 AQ 5.0998273 sec  
 RG 5  
 DW 62.400 usec  
 DE 6.00 usec  
 TE 298.0 K  
 D1 0.10000000 sec  
 MCREST 0 sec  
 MCWRK 0.01500000 sec

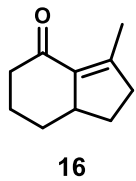

==== CHANNEL f1 =====  
 NUC1 1H  
 P1 7.50 usec  
 PL1 1.60 dB  
 SFO1 500.2235015 MHz

F2 - Processing parameters  
 SI 65536  
 SF 500.2200308 MHz  
 WDW EM  
 SSB 0  
 LB 0.30 Hz  
 GB 0  
 PC 4.00

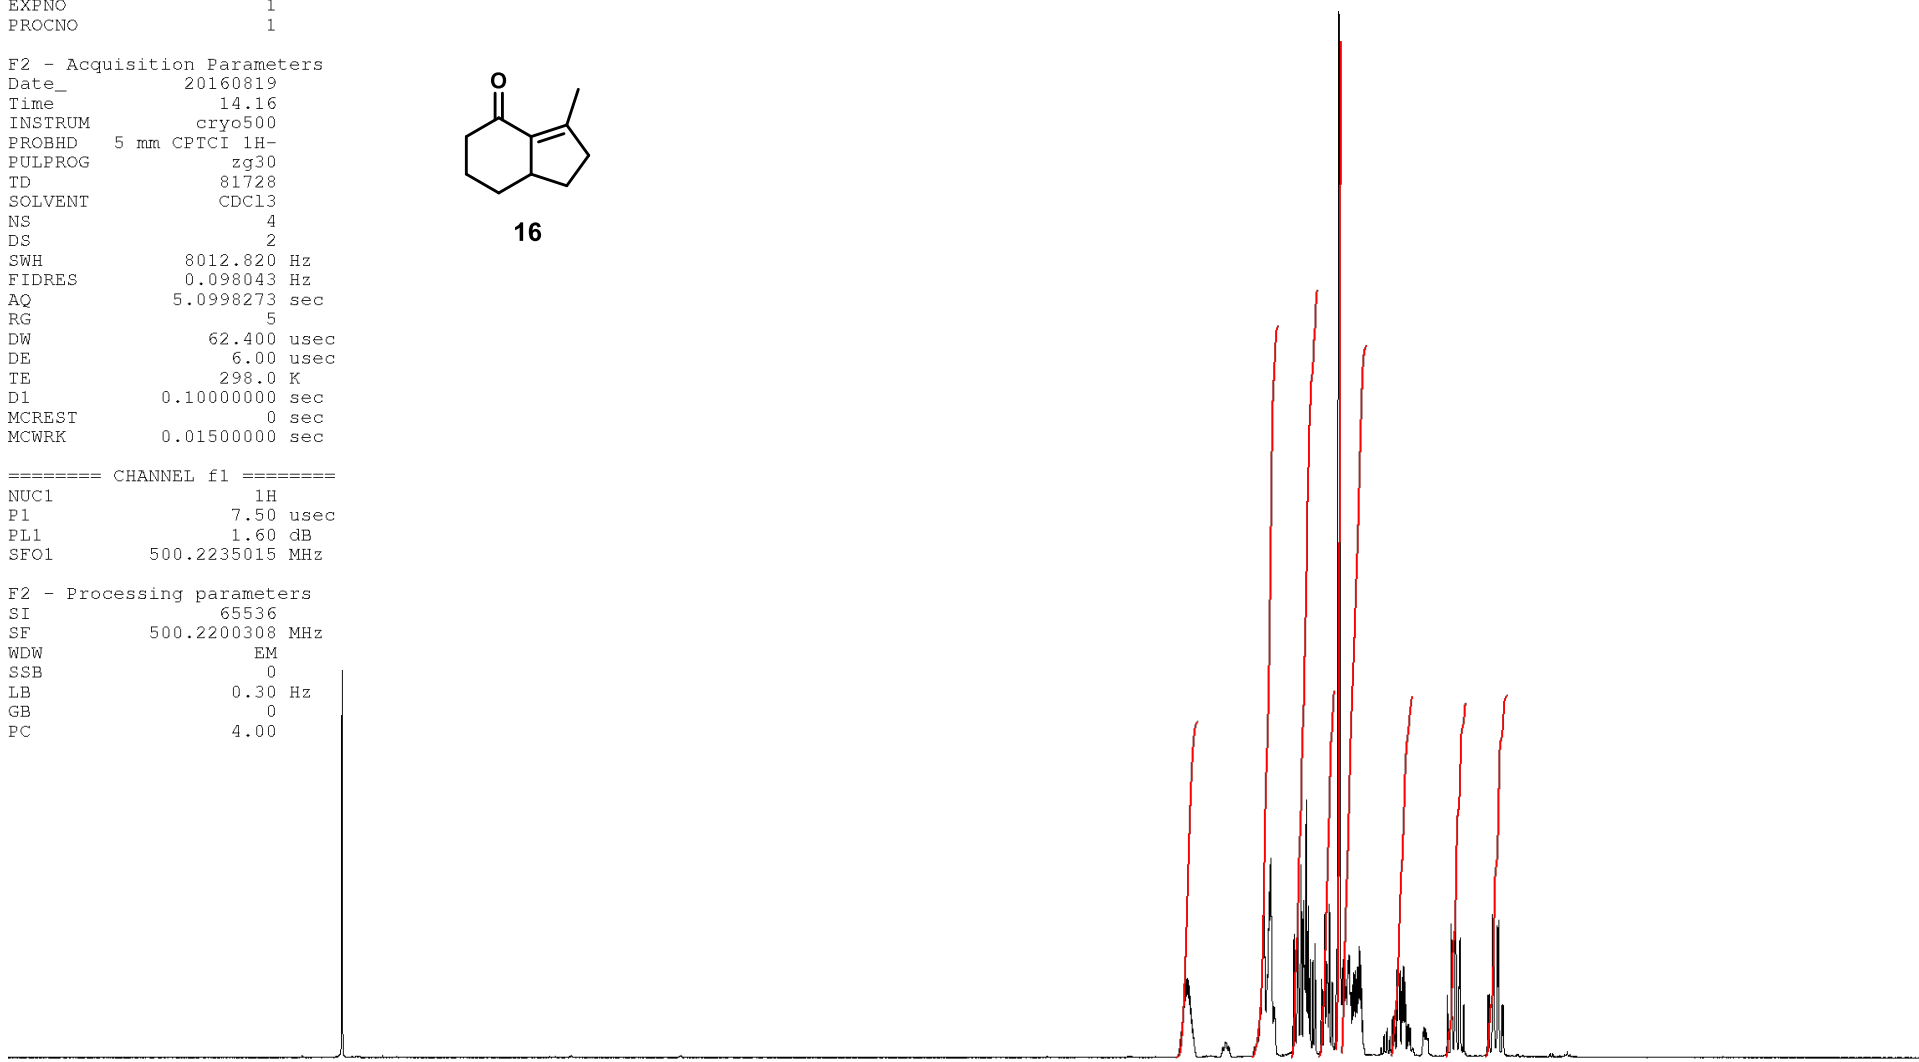

8.5 8.0 7.5 7.0 6.5 6.0 5.5 5.0 4.5 4.0 3.5 3.0 2.5 2.0 1.5 1.0 0.5 0.0 ppm

1.00  
2.18  
2.29  
1.09  
3.11  
2.12  
1.08  
1.06  
1.08

Current Data Parameters  
NAME JC 1-259 hydrinenone  
EXPNO 2  
PROCNO 1

F2 - Acquisition Parameters  
Date\_ 20160819  
Time 14.17  
INSTRUM cryo500  
PROBHD 5 mm CPTCI 1H-  
PULPROG SpinEchopg30gp.prd  
ID 65536  
SOLVENT CDCl3  
NS 35  
DS 16  
SWH 30303.031 Hz  
FIDRES 0.462388 Hz  
AQ 1.0813440 sec  
RG 7298.2  
DW 16.500 usec  
DE 6.00 usec  
TE 298.0 K  
D1 0.25000000 sec  
d11 0.03000000 sec  
D16 0.00020000 sec  
d17 0.00019600 sec  
MCREST 0 sec  
MCWRK 0.01500000 sec  
F2 33.10 usec

----- CHANNEL f1 -----  
NUC1 13C  
P1 16.55 usec  
P11 500.00 usec  
P12 2000.00 usec  
PL0 120.00 dB  
PL1 -1.00 dB  
SFO1 125.7942548 MHz  
SP1 2.70 dB  
SP2 2.70 dB  
SPNAM[1] Crp60,0.5,20.1  
SPNAM[2] Crp60comp.4  
SPOFF1 0 Hz  
SPOFF2 0 Hz

----- CHANNEL f2 -----  
CPDPRG2 waltz16  
NUC2 1H  
PCPD2 100.00 usec  
PL2 1.60 dB  
PL12 24.50 dB  
SFO2 500.2225011 MHz

----- GRADIENT CHANNEL -----  
GPNAM[1] SINE.100  
GPNAM[2] SINE.100  
GFX1 0 %  
GFX2 0 %  
GPY1 0 %  
GPY2 0 %  
GPZ1 30.00 %  
GPZ2 50.00 %  
p15 500.00 usec  
p16 1000.00 usec

F2 - Processing parameters  
SI 65536  
SF 125.7804080 MHz  
WDW EM  
SSB 0  
LB 1.00 Hz  
GB 0  
PC 2.00

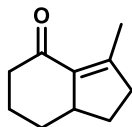

16

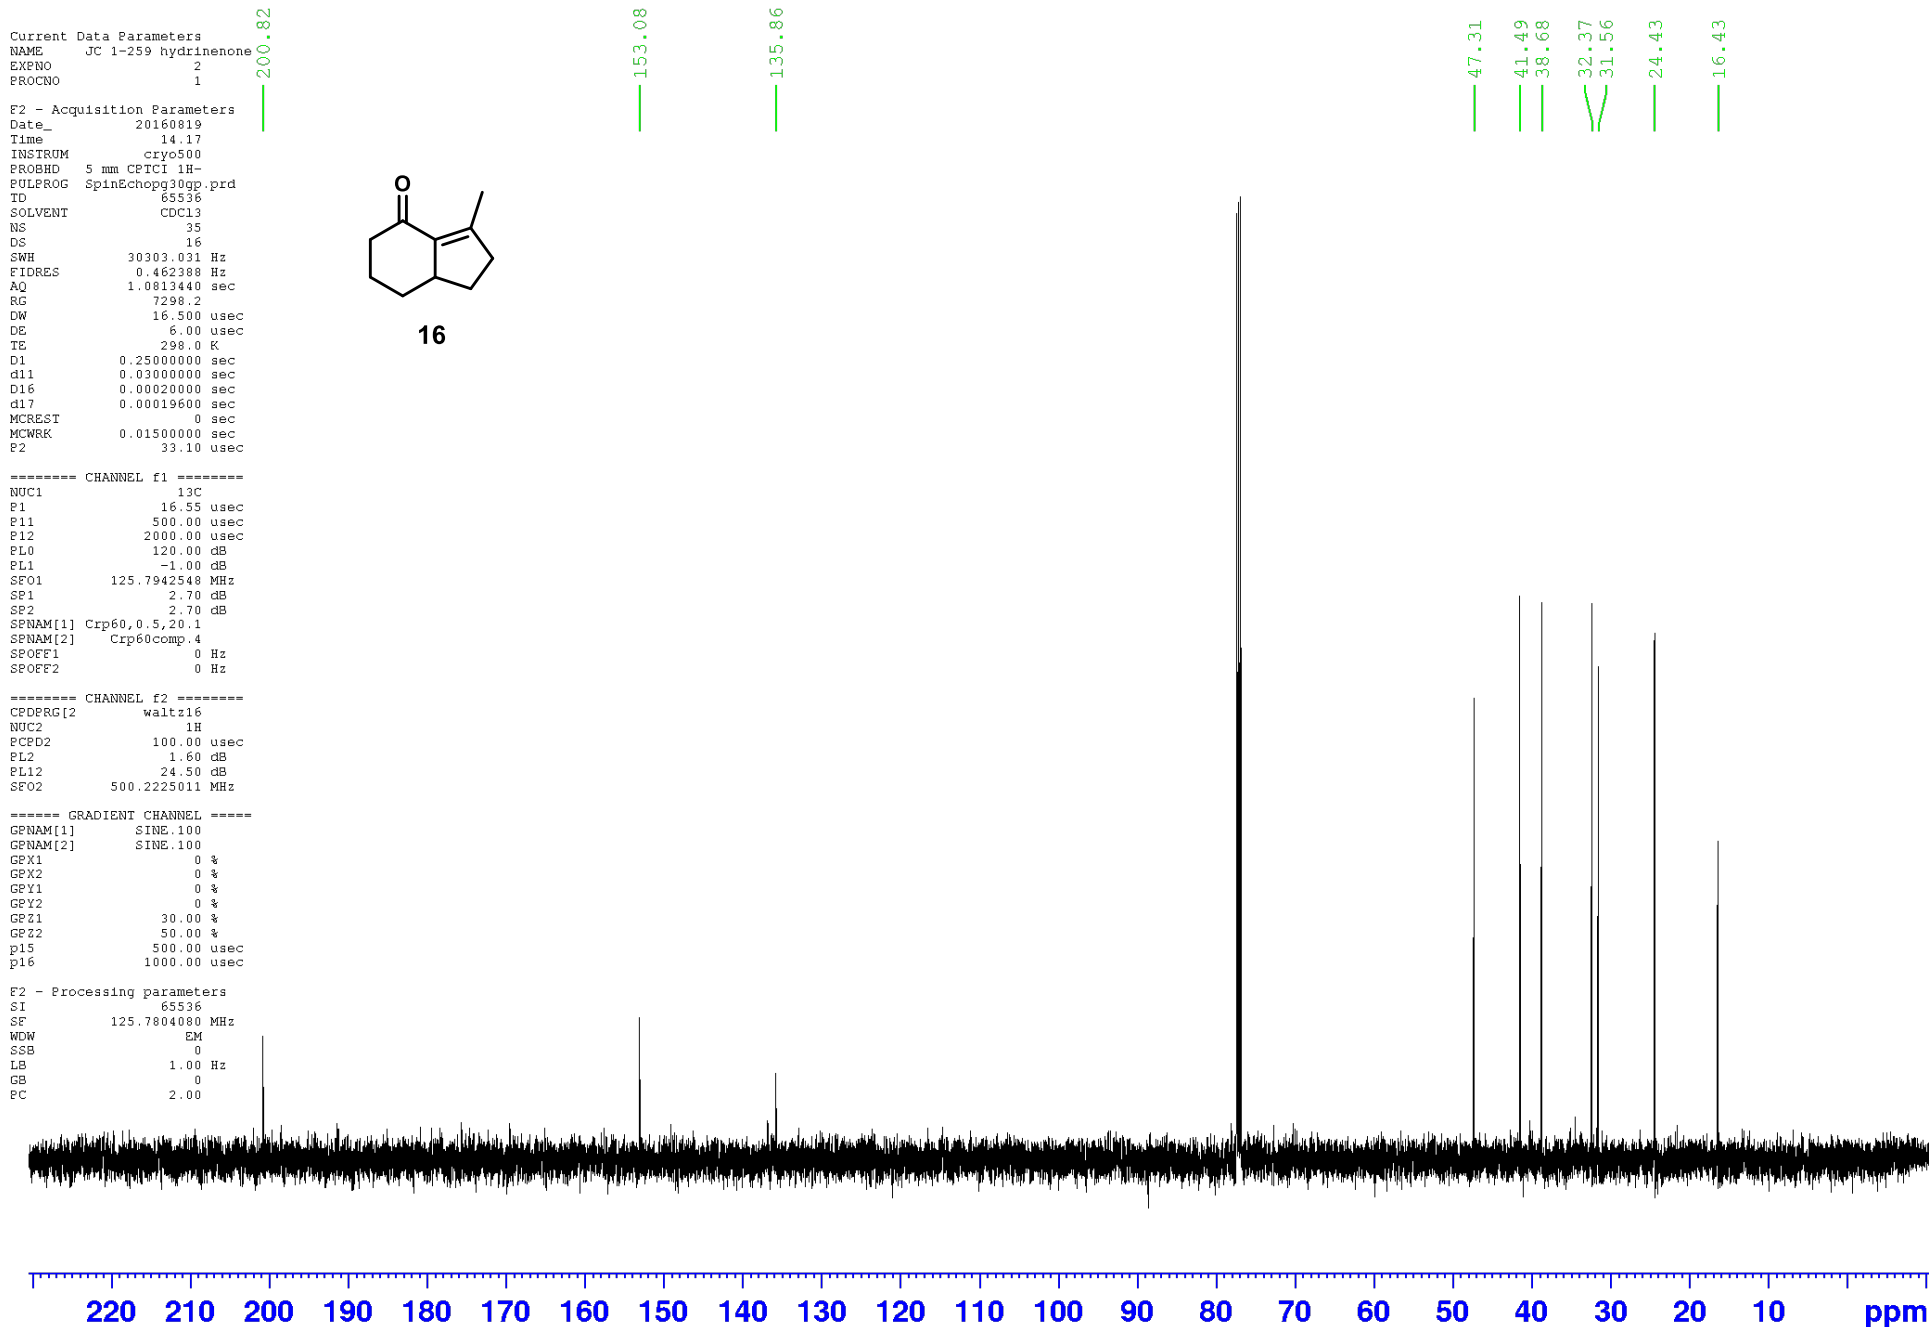

Current Data Parameters  
 NAME JC 1-141 CuI butene  
 EXPNO 1  
 PROCNO 1

F2 - Acquisition Parameters  
 Date\_ 20160525  
 Time 22.18  
 INSTRUM gn500  
 PROBHD 5 mm broadband  
 PULPROG zg30  
 TD 81728  
 SOLVENT CDCl3  
 NS 8  
 DS 2  
 SWH 8012.820 Hz  
 FIDRES 0.098043 Hz  
 AQ 5.0998273 sec  
 RG 574.7  
 DW 62.400 usec  
 DE 6.00 usec  
 TE 298.2 K  
 D1 0.10000000 sec  
 MCREST 0 sec  
 MCWRK 0.01500000 sec

===== CHANNEL f1 =====  
 NUC1 1H  
 P1 12.00 usec  
 PL1 -5.80 dB  
 SFO1 499.0734935 MHz

F2 - Processing parameters  
 SI 65536  
 SF 499.0700314 MHz  
 WDW EM  
 SSB 0  
 LB 0.30 Hz  
 GB 0  
 PC 1.00

5.84  
5.83  
5.82  
5.81  
5.80  
5.79  
5.78  
5.76

5.00  
4.97  
4.91  
4.89

2.27  
2.25  
2.21  
2.20  
2.19  
2.17  
2.16  
2.15  
2.12  
2.11  
2.08  
2.06  
2.05  
2.03  
2.01  
1.97  
1.96  
1.90  
1.88  
1.85  
1.83  
1.78  
1.77  
1.75  
1.74  
1.73  
1.72  
1.69  
1.67  
1.66  
1.65  
1.64  
1.63  
1.62  
1.61  
1.57  
1.55  
1.53  
1.51  
1.40  
1.40  
1.37  
1.35  
1.33  
1.32  
1.30  
1.28  
1.27

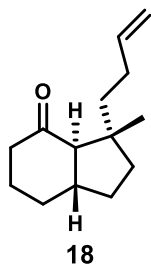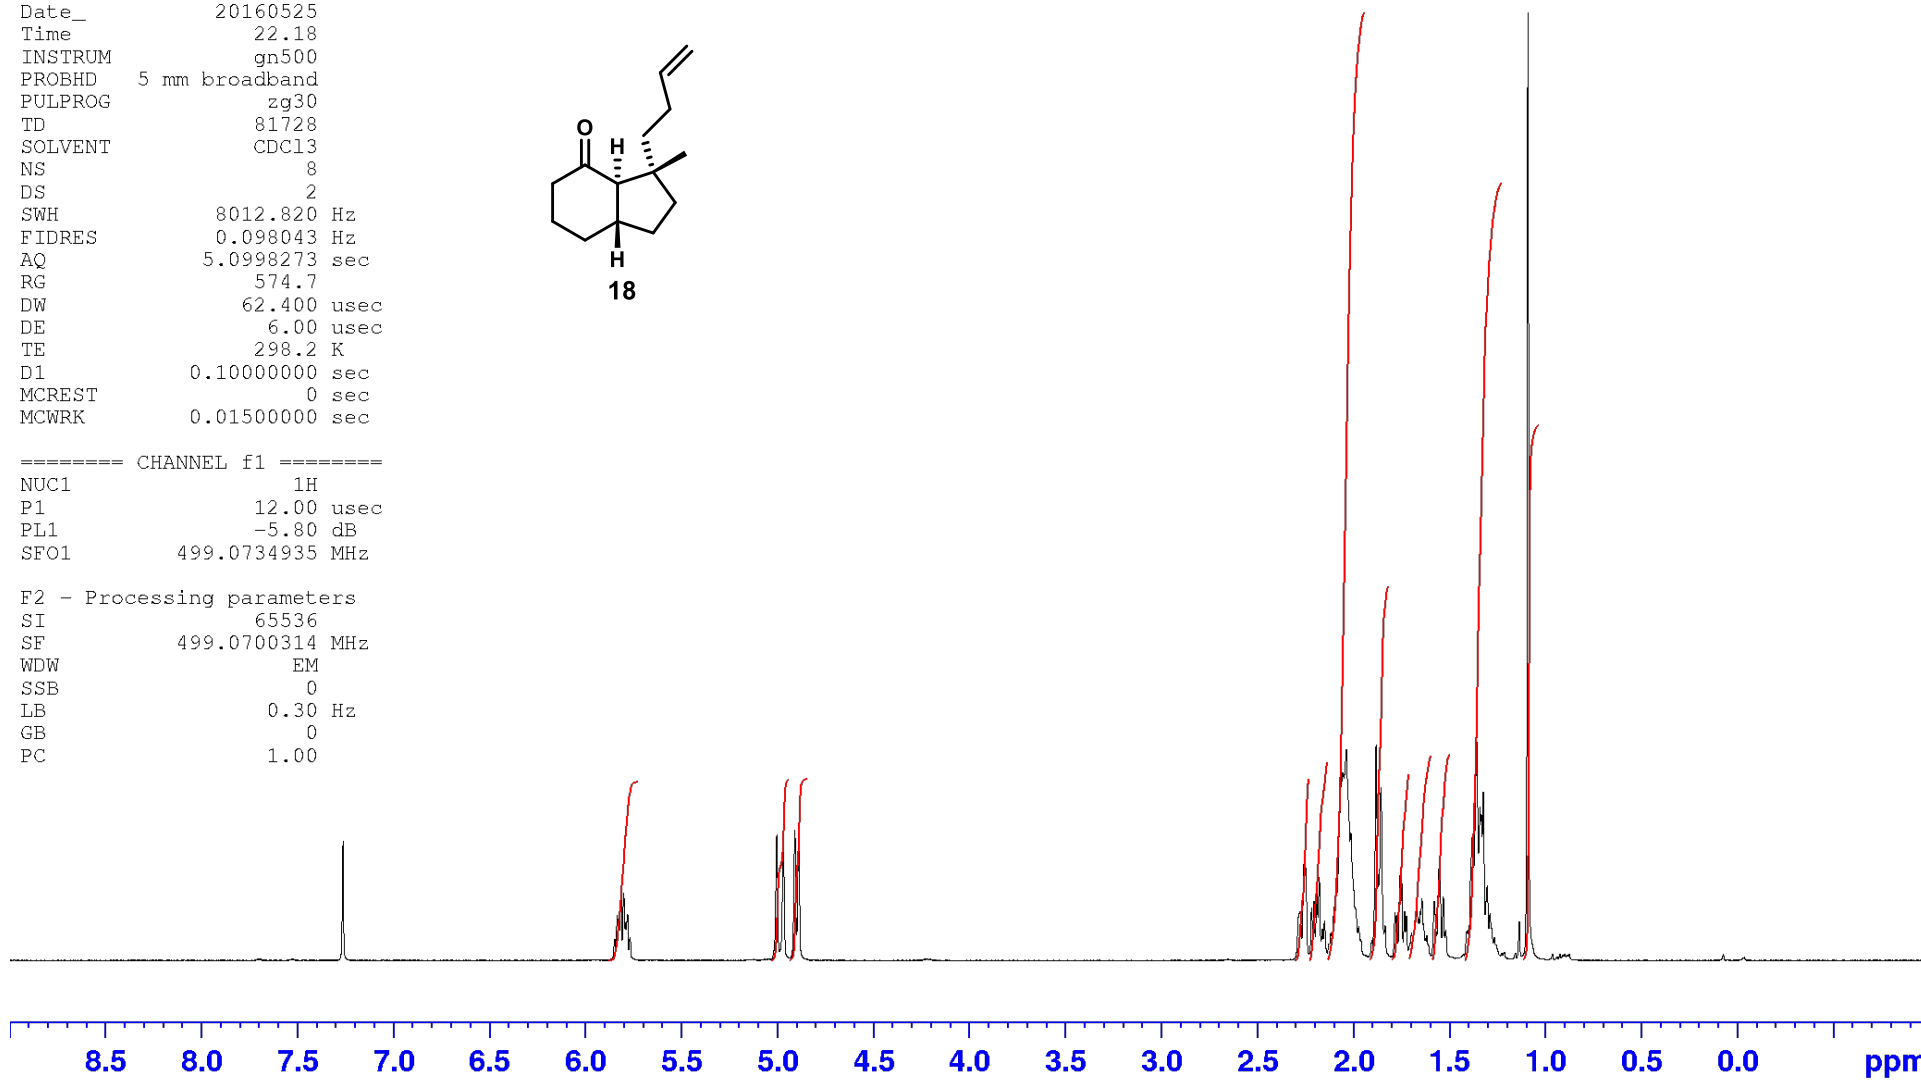

1.00

1.02  
1.02

1.03  
1.11  
5.30  
2.10  
1.04  
1.15  
1.16  
4.35  
3.00

```

Current Data Parameters
NAME      JC 1-020-6 NaOH
EXPNO     2
PROCNO    1

F2 - Acquisition Parameters
Date_     20160302
Time      16.42
INSTRUM   cryo500
PROBHD    5 mm CPTCI 1H-
PULPROG   SpinEchopg30gp.prd
TD         65536
SOLVENT   CDCl3
NS         128
DS         16
SWH        30303.031 Hz
FIDRES     0.462388 Hz
AQ         1.0813440 sec
RG         7298.2
DM         16.500 usec
DE         6.00 usec
TE         298.0 K
D1         0.25000000 sec
d11        0.03000000 sec
D16        0.00020000 sec
d17        0.00019600 sec
MCREST     0 sec
MCWRK     0.01500000 sec
P2         33.10 usec

----- CHANNEL f1 -----
NUC1       13C
P1         16.55 usec
P11        500.00 usec
P12        2000.00 usec
PL0        120.00 dB
PL1        -1.00 dB
SFO1       125.7942548 MHz
SP1        2.70 dB
SP2        2.70 dB
SPPAM[1]   Crp60, 0.5, 20.1
SPPAM[2]   Crp60comp, 4
SPOFF1     0 Hz
SPOFF2     0 Hz

----- CHANNEL f2 -----
CPDPRG[2]  waltz16
NUC2       1H
PCPD2     100.00 usec
PL2        1.60 dB
PL12       24.50 dB
SFO2       500.2225011 MHz

----- GRADIENT CHANNEL -----
GPPAM[1]   SINE.100
GPPAM[2]   SINE.100
GPX1       0 %
GPX2       0 %
GPY1       0 %
GPY2       0 %
GPZ1       30.00 %
GPZ2       50.00 %
p15        500.00 usec
p16        1000.00 usec

F2 - Processing parameters
SI         65536
SF         125.7804092 MHz
WDW        EM
SSB        0
LB         1.00 Hz
GB         0
PC         2.00

```

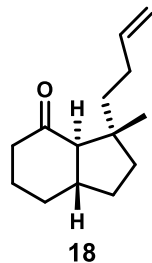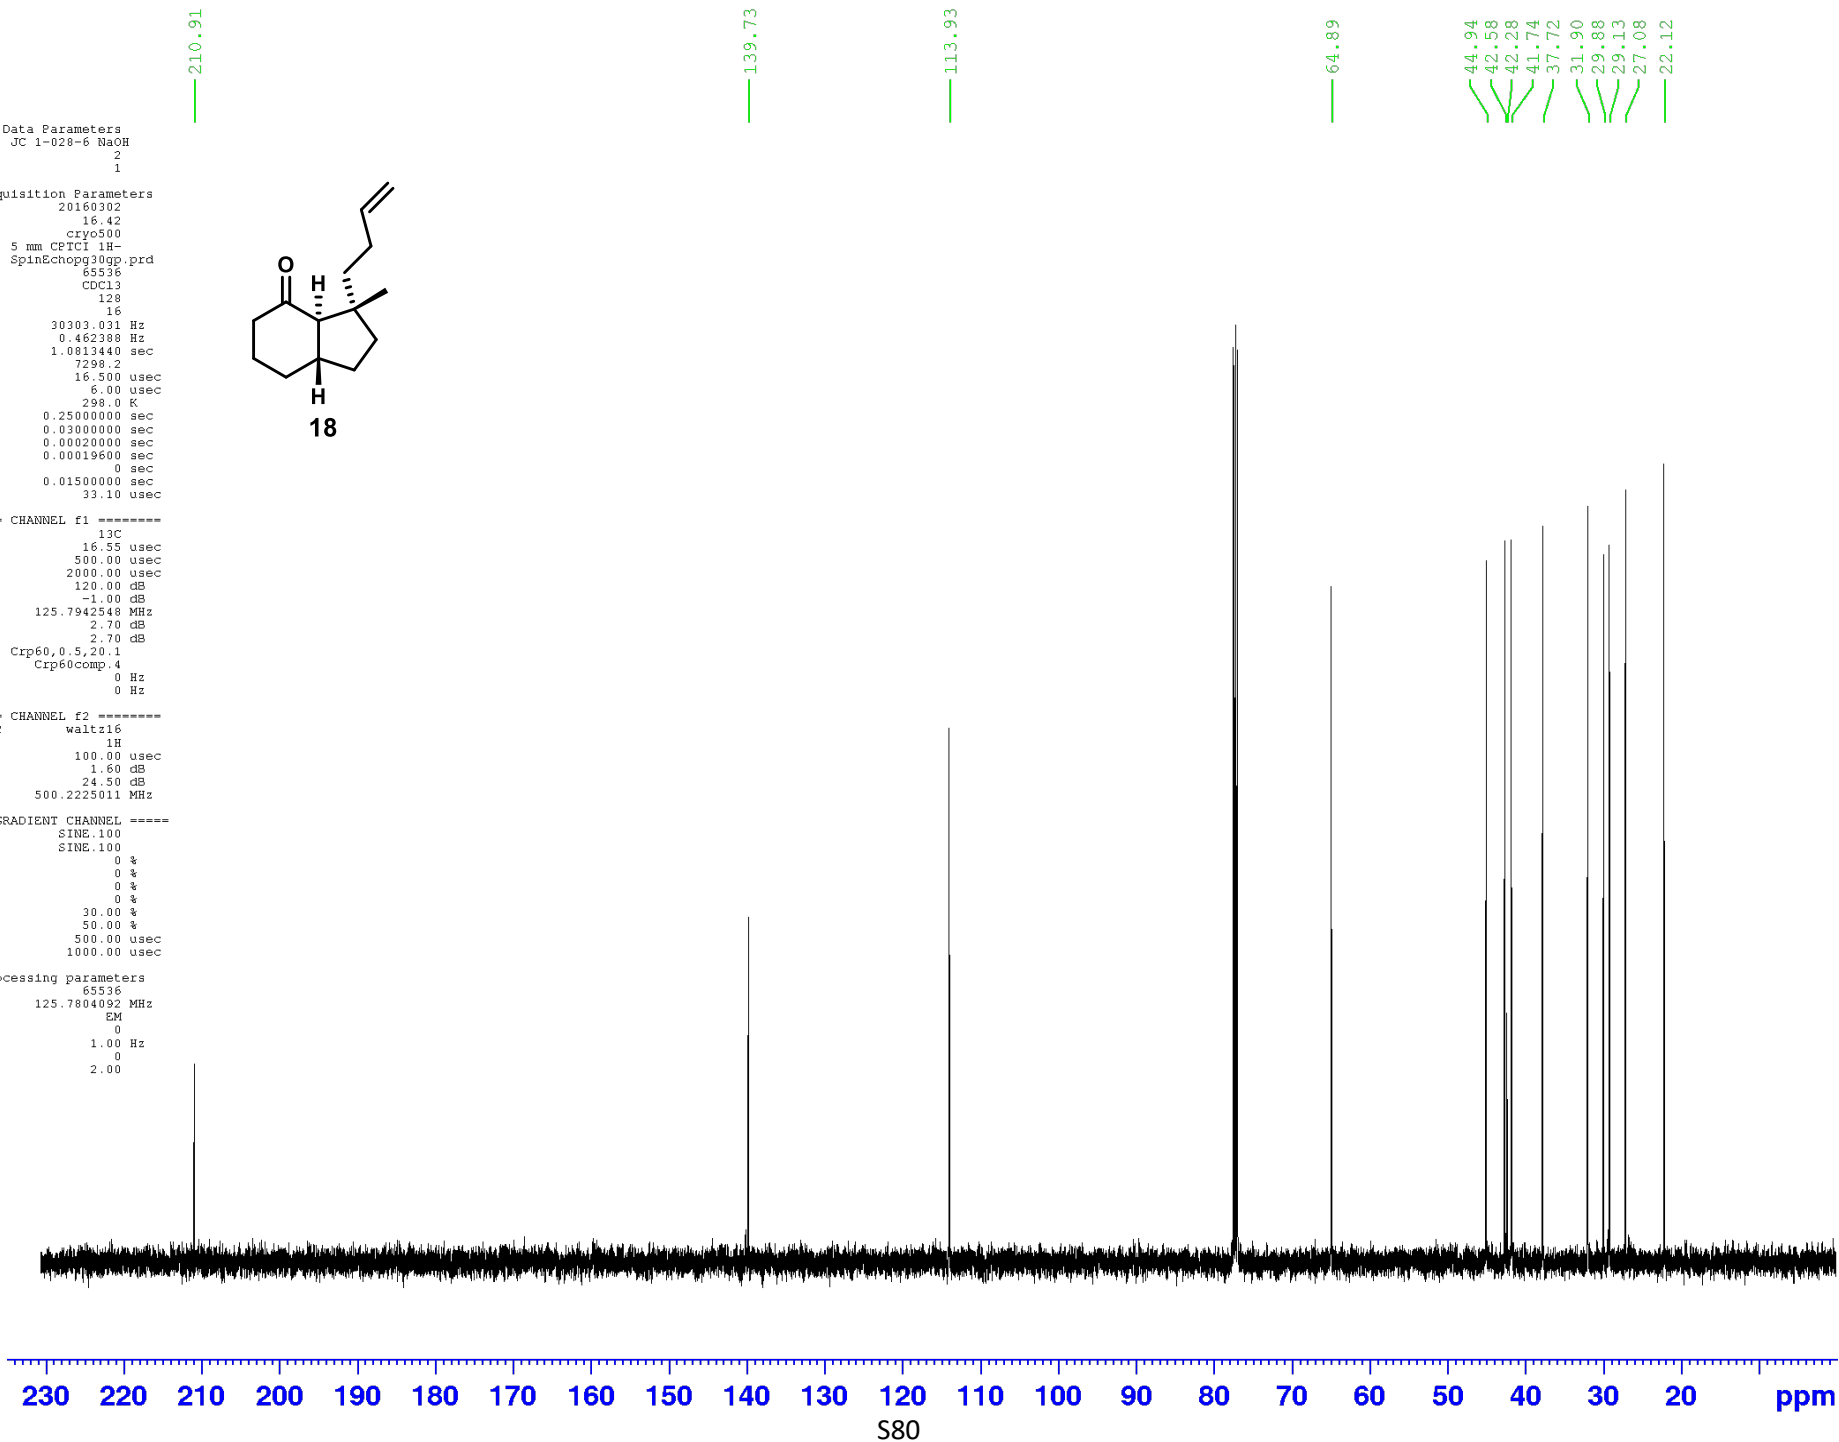



9.75  
9.75  
2.57  
2.56  
2.56  
2.55  
2.53  
2.52  
2.51  
2.46  
2.45  
2.44  
2.44  
2.43  
2.43  
2.42  
2.40  
2.40  
2.39  
2.39  
2.29  
2.28  
2.26  
2.25  
2.21  
2.20  
2.20  
2.18  
2.17  
2.15  
2.14  
2.06  
2.06  
2.05  
2.04  
2.04  
2.03  
2.02  
2.01  
1.98  
1.97  
1.96  
1.96  
1.95  
1.94  
1.93  
1.92  
1.90  
1.89  
1.88  
1.87  
1.86  
1.84  
1.67  
1.66  
1.65  
1.64  
1.63  
1.63  
1.62  
1.61  
1.61  
1.60  
1.53  
1.50  
1.49  
1.48  
1.47  
1.41  
1.39  
1.39  
1.38  
1.37  
1.36  
1.35  
1.34  
1.33  
1.33  
1.31  
1.30  
1.08

Current Data Parameters  
 NAME JC 1-056-12 aldehyde  
 EXPNO 1  
 PROCNO 1

F2 - Acquisition Parameters  
 Date\_ 20160324  
 Time 16.27  
 INSTRUM cryo500  
 PROBHD 5 mm CPTCI 1H-  
 PULPROG zg30  
 TD 81728  
 SOLVENT CDCl3  
 NS 8  
 DS 2  
 SWH 8012.820 Hz  
 FIDRES 0.098043 Hz  
 AQ 5.0998273 sec  
 RG 5  
 DW 62.400 usec  
 DE 6.00 usec  
 TE 298.0 K  
 D1 0.10000000 sec  
 MCREST 0 sec  
 MCWRK 0.01500000 sec

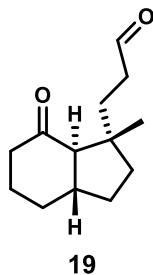

==== CHANNEL f1 =====  
 NUC1 1H  
 P1 7.50 usec  
 PL1 1.60 dB  
 SF01 500.2235015 MHz

F2 - Processing parameters  
 SI 65536  
 SF 500.2200315 MHz  
 WDW EM  
 SSB 0  
 LB 0.30 Hz  
 GB 0  
 PC 4.00

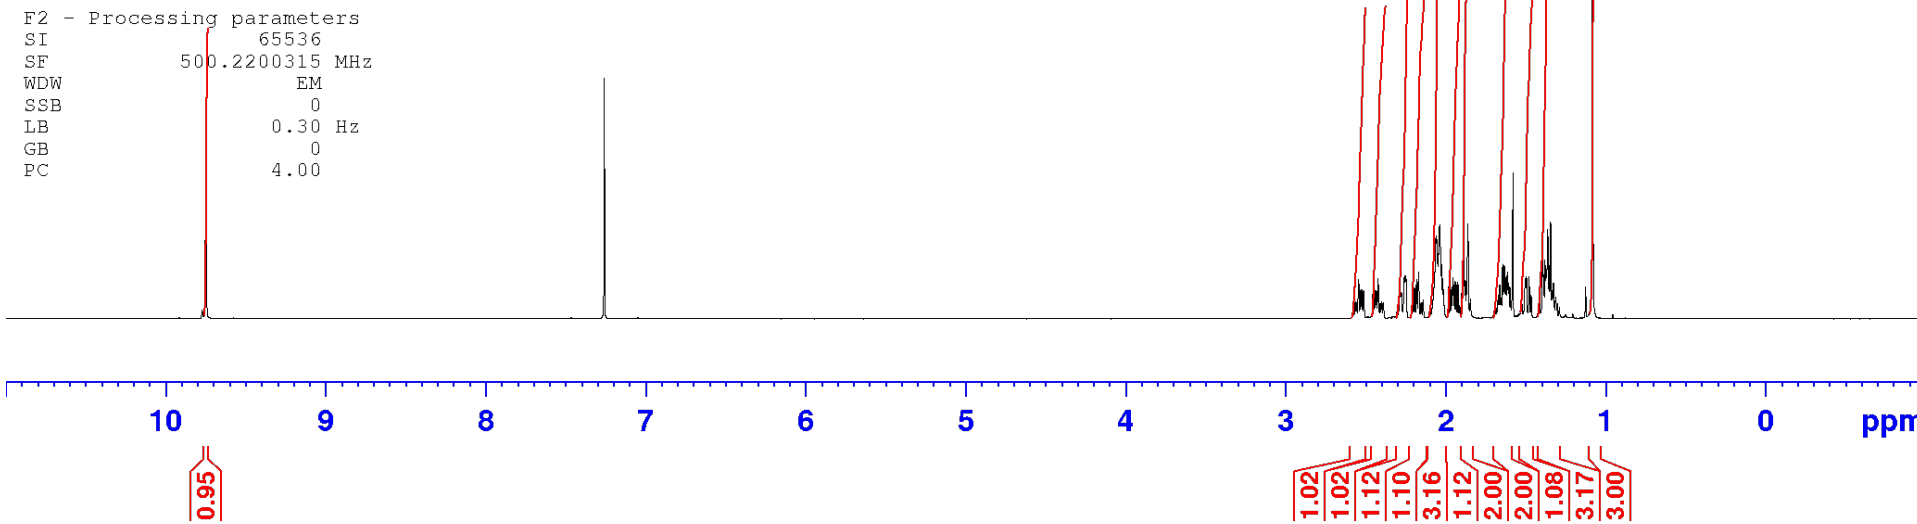

Current Data Parameters  
 NAME JC 1-056-12 aldehyde  
 EXPNO 2  
 PROCNO 1

F2 - Acquisition Parameters  
 Date\_ 20160324  
 Time 16.29  
 INSTRUM cryo500  
 PROBHD 5 mm CPYCI 1H-  
 PULPROG SpinEchopg30gp.prd  
 TD 65536  
 SOLVENT CDCl3  
 NS 55  
 DS 16  
 SMH 30303.031 Hz  
 FIDRES 0.462388 Hz  
 AQ 1.0813440 sec  
 RG 7298.2  
 DM 16.500 usec  
 DE 6.00 usec  
 TE 298.0 K  
 DL 0.25000000 sec  
 dL1 0.03000000 sec  
 DL6 0.00020000 sec  
 dL7 0.00019600 sec  
 MCREST 0 sec  
 MCWRE 0.01500000 sec  
 F2 33.10 usec

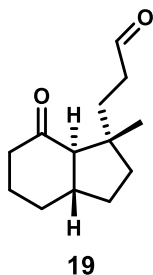

===== CHANNEL f1 =====  
 NUC1 13C  
 P1 16.55 usec  
 PL1 500.00 usec  
 PL2 2000.00 usec  
 PL0 120.00 dB  
 PL1 -1.00 dB  
 SF01 125.7942548 MHz  
 SP1 2.70 dB  
 SP2 2.70 dB  
 SFOFF1 Crp60, 0.5, 20.1  
 SFOFF2 Crp60comp, 4  
 SFOFF1 0 Hz  
 SFOFF2 0 Hz

===== CHANNEL f2 =====  
 CPDPRG2 waltz16  
 NUC2 1H  
 PCPD2 100.00 usec  
 PL2 1.60 dB  
 PL12 24.50 dB  
 SF02 500.2225011 MHz

===== GRADIENT CHANNEL =====  
 GPNAM[1] SINE.100  
 GPNAM[2] SINE.100  
 GPX1 0 %  
 GPX2 0 %  
 GPY1 0 %  
 GPY2 0 %  
 GPZ1 30.00 %  
 GPZ2 50.00 %  
 P15 500.00 usec  
 P16 1000.00 usec

F2 - Processing parameters  
 SI 65536  
 SF 125.7804091 MHz  
 WDW EM  
 SSB 0  
 LB 1.00 Hz  
 GB 0  
 PC 2.00

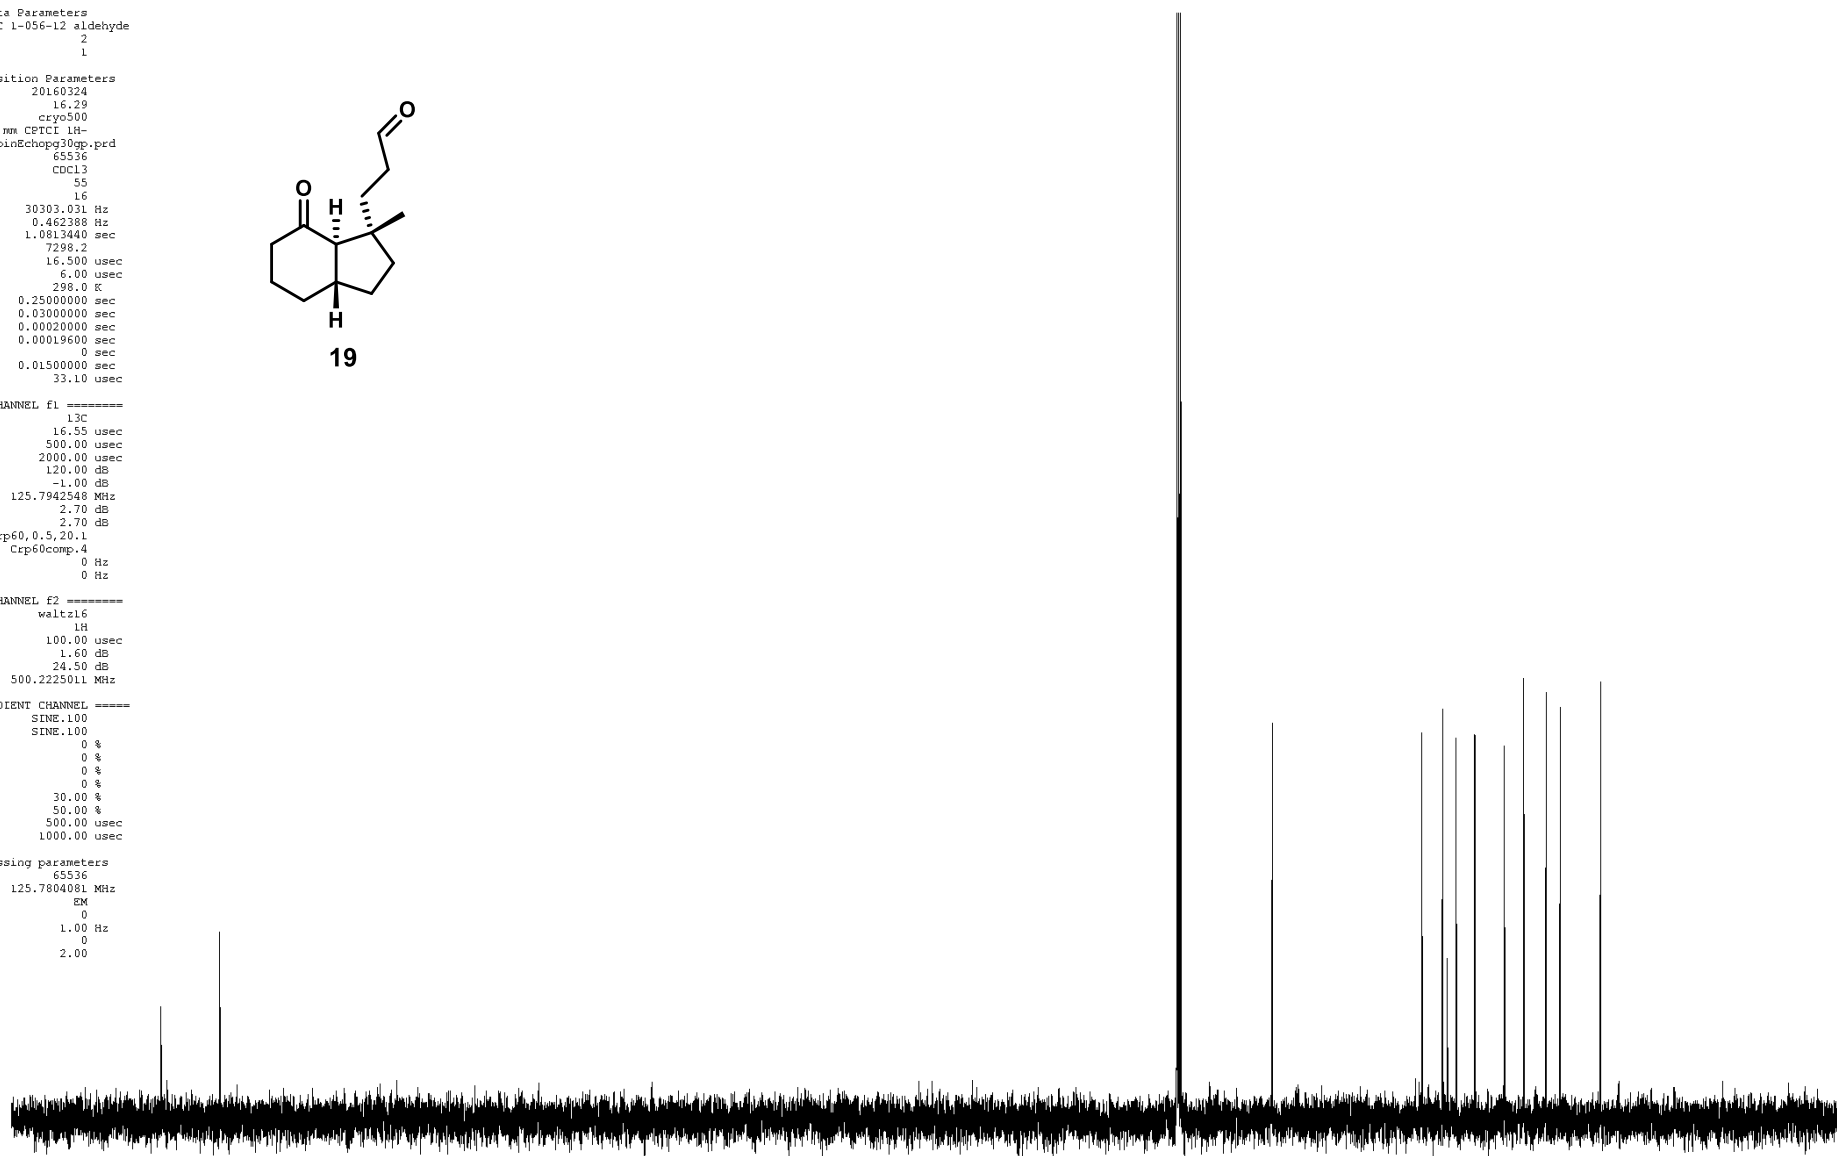

210.85  
 203.14

64.89  
 45.22  
 42.51  
 41.86  
 40.72  
 38.27  
 34.37  
 31.82  
 28.92  
 27.03  
 21.70

220 210 200 190 180 170 160 150 140 130 120 110 100 90 80 70 60 50 40 30 20 10 ppm

7.26  
3.06  
3.05  
3.04  
3.03  
3.01  
3.00  
2.20  
2.20  
2.20  
2.19  
2.18  
2.17  
2.17  
2.06  
2.06  
2.05  
2.04  
2.04  
2.03  
2.02  
2.01  
2.01  
2.00  
1.99  
1.99  
1.98  
1.98  
1.97  
1.97  
1.96  
1.96  
1.95  
1.94  
1.94  
1.93  
1.93  
1.74  
1.71  
1.70  
1.69  
1.69  
1.66  
1.66  
1.65  
1.65  
1.62  
1.61  
1.60  
1.59  
1.59  
1.58  
1.57  
1.57  
1.56  
1.56  
1.54  
1.54  
1.47  
1.46  
1.46  
1.44  
1.44  
1.43  
1.43  
1.40  
1.40  
1.39  
1.38  
1.32  
1.31  
1.30  
1.30  
1.29  
1.29  
1.28  
1.27  
1.26  
1.25  
1.23  
1.21  
1.00  
0.97  
0.97  
0.95  
0.95  
0.93  
0.93  
0.91  
0.91

Current Data Parameters  
NAME JC 1-284 NHC cyclise recryst  
EXPNO 1  
PROCNO 1

F2 - Acquisition Parameters  
Date\_ 20160912  
Time 19.15  
INSTRUM av600  
PROBHD 5 mm CPBBO BB-  
PULPROG zg30  
TD 57690  
SOLVENT CDCl3  
NS 8  
DS 0  
SWH 9615.385 Hz  
FIDRES 0.166673 Hz  
AQ 2.9998801 sec  
RG 10  
DW 52.000 usec  
DE 13.70 usec  
TE 298.0 K  
D1 0.10000000 sec  
TD0 1

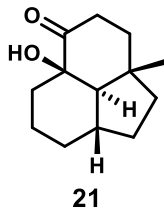

===== CHANNEL f1 =====  
SFO1 600.1342009 MHz  
NUC1 1H  
P1 12.00 usec  
PLW1 20.00000000 W

F2 - Processing parameters  
SI 65536  
SF 600.1300357 MHz  
WDW EM  
SSB 0  
LB 0.30 Hz  
GB 0  
PC 1.00

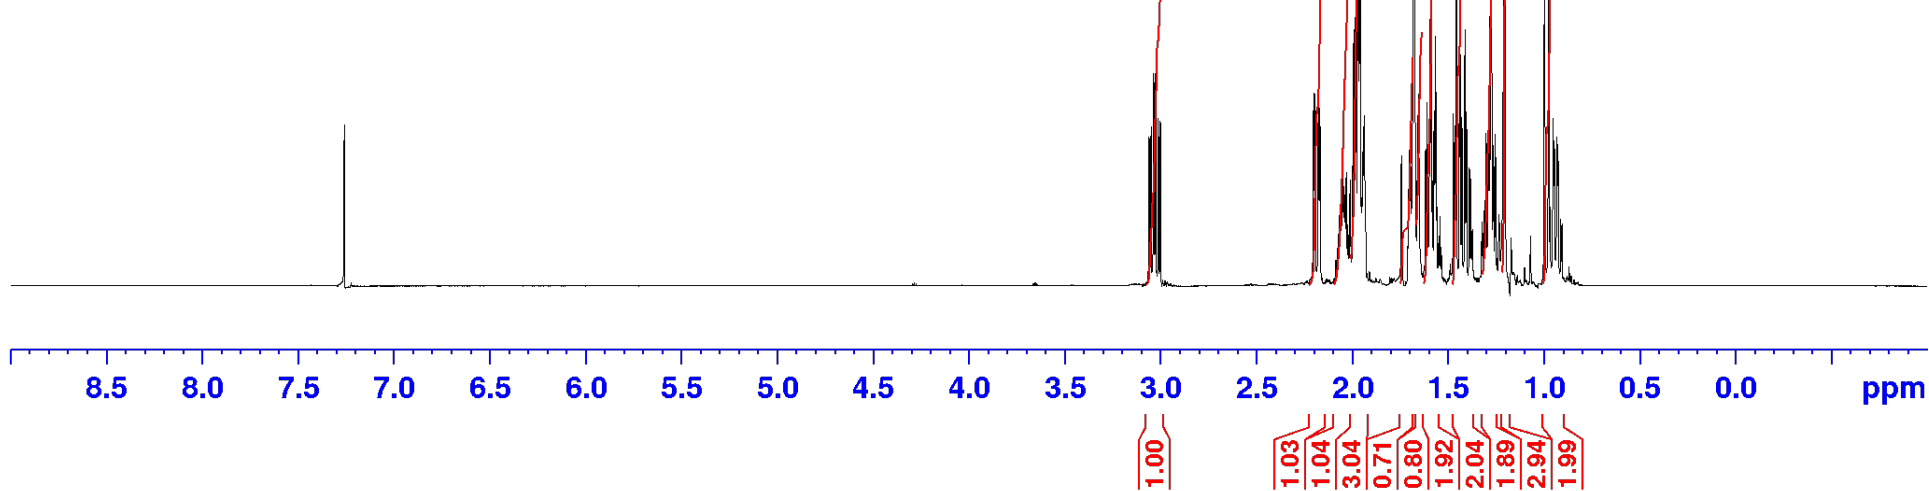

Current Data Parameters  
NAME JC 1-284 NHC cyclise recryst  
EXPNO 2  
PROCNO 1

F2 - Acquisition Parameters

Date\_ 20160912  
Time 19.20  
INSTRUM av600  
PROBHD 5 mm CPBBO BB-  
PULPROG zgdc30  
TD 65536  
SOLVENT CDCl3  
NS 79  
DS 4  
SWH 36231.883 Hz  
FIDRES 0.552855 Hz  
AQ 0.9043968 sec  
RG 2050  
DW 13.800 usec  
DE 19.65 usec  
TE 298.0 K  
D1 0.40000001 sec  
D11 0.03000000 sec  
TD0 1

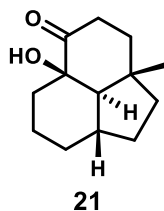

=====  
SFO1 150.9194075 MHz  
NUC1 13C  
P1 10.00 usec  
PLW1 64.00000000 W

=====  
SFO2 600.1330010 MHz  
NUC2 1H  
CPDPRG[2] waltz16  
PCPD2 80.00 usec  
PLW2 20.00000000 W  
PLW12 0.36000001 W

F2 - Processing parameters  
SI 65536  
SF 150.9027969 MHz  
WDW EM  
SSB 0  
LB 1.00 Hz  
GB 0  
PC 1.00

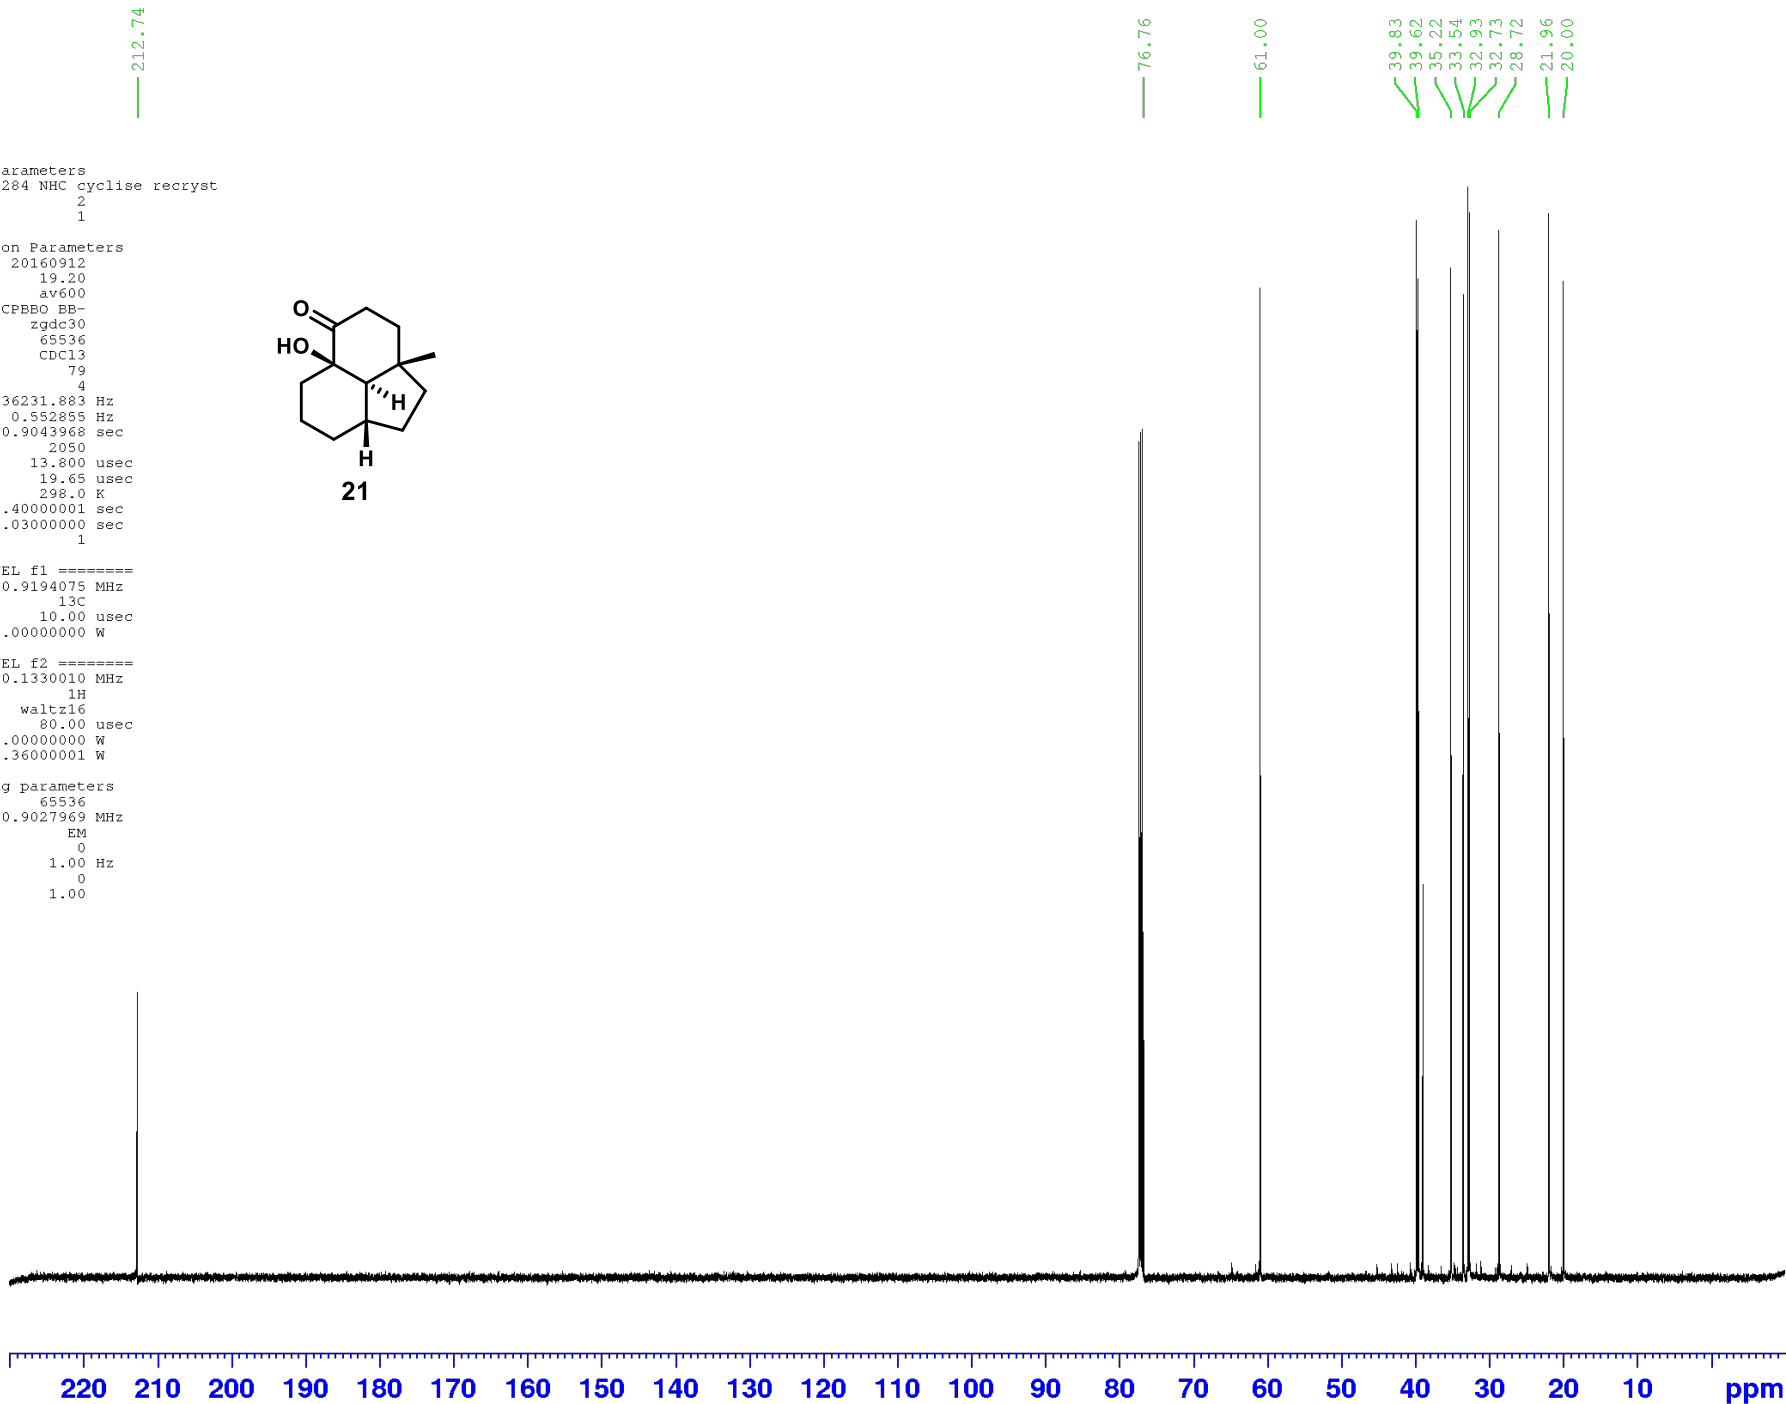

3.04  
3.03  
3.01  
3.00  
2.99  
2.98  
2.17  
2.17  
2.16  
2.15  
2.15  
2.14  
2.14  
2.06  
2.06  
2.04  
2.04  
1.98  
1.97  
1.96  
1.96  
1.96  
1.95  
1.95  
1.95  
1.94  
1.94  
1.93  
1.93  
1.92  
1.92  
1.90  
1.90  
1.81  
1.80  
1.80  
1.79  
1.78  
1.78  
1.65  
1.64  
1.63  
1.62  
1.62  
1.61  
1.60  
1.58  
1.58  
1.56  
1.55  
1.54  
1.54  
1.53  
1.52  
1.52  
1.51  
1.43  
1.42  
1.41  
1.41  
1.40  
1.40  
1.39  
1.39  
1.37  
1.37  
1.35  
1.34  
1.34  
1.28  
1.27  
1.26  
1.26  
1.25  
1.25  
1.25  
1.24  
1.24  
1.23  
1.22  
1.21  
1.21  
1.20  
1.17  
0.93  
0.92  
0.91  
0.90  
0.86  
0.84  
0.08

Current Data Parameters  
NAME JC 1-116 TMS  
EXPNO 1  
PROCNO 1

F2 - Acquisition Parameters  
Date\_ 20160512  
Time 14.50  
INSTRUM av600  
PROBHD 5 mm CPBBO BB-  
PULPROG zg30  
TD 98074  
SOLVENT CDC13  
NS 8  
DS 2  
SWH 9615.385 Hz  
FIDRES 0.098042 Hz  
AQ 5.0998478 sec  
RG 12.7  
DW 52.000 usec  
DE 13.70 usec  
TE 298.0 K  
D1 0.10000000 sec  
TDO 1

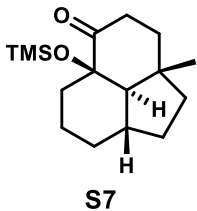

==== CHANNEL f1 =====  
SFO1 600.1342009 MHz  
NUC1 1H  
P1 12.00 usec  
PLW1 20.00000000 W

F2 - Processing parameters  
SI 65536  
SF 600.1300357 MHz  
WDW EM  
SSB 0  
LB 0.30 Hz  
GB 0  
PC 1.00

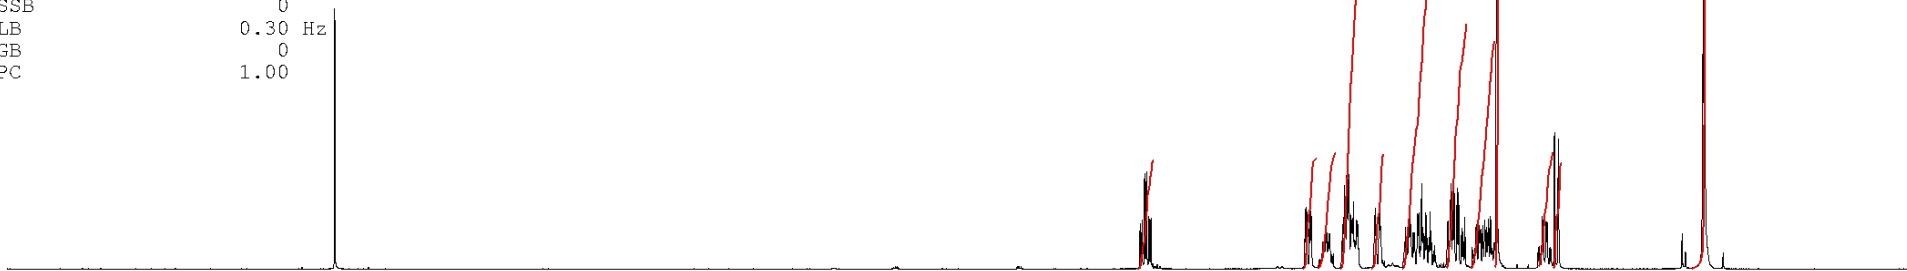

8.5 8.0 7.5 7.0 6.5 6.0 5.5 5.0 4.5 4.0 3.5 3.0 2.5 2.0 1.5 1.0 0.5 0.0 ppm

1.00  
1.01  
1.06  
2.97  
1.05  
3.25  
2.25  
2.14  
3.02  
1.06  
0.98  
9.16

Current Data Parameters  
 NAME JC 1-116 TMS  
 EXPNO 2  
 PROCNO 1

F2 - Acquisition Parameters  
 Date\_ 20160512  
 Time 14.52  
 INSTRUM av600  
 PROBHD 5 mm CPBBO BB-  
 PULPROG zgdc30  
 TD 65536  
 SOLVENT CDCl3  
 NS 38  
 DS 4  
 SWH 36231.883 Hz  
 FIDRES 0.552855 Hz  
 AQ 0.9043968 sec  
 RG 2050  
 DW 13.800 usec  
 DE 19.65 usec  
 TE 298.0 K  
 D1 0.40000001 sec  
 D11 0.03000000 sec  
 TDO 1

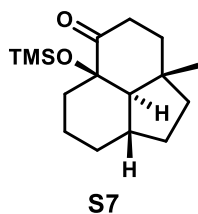

==== CHANNEL f1 =====  
 SFO1 150.9194075 MHz  
 NUC1 13C  
 P1 10.00 usec  
 PLW1 64.00000000 W

==== CHANNEL f2 =====  
 SFO2 600.1330010 MHz  
 NUC2 1H  
 CPDPRG[2] waltz16  
 PCPD2 80.00 usec  
 PLW2 20.00000000 W  
 PLW12 0.36000001 W

F2 - Processing parameters  
 SI 65536  
 SF 150.9027931 MHz  
 WDW EM  
 SSB 0  
 LB 1.00 Hz  
 GB 0  
 PC 1.00

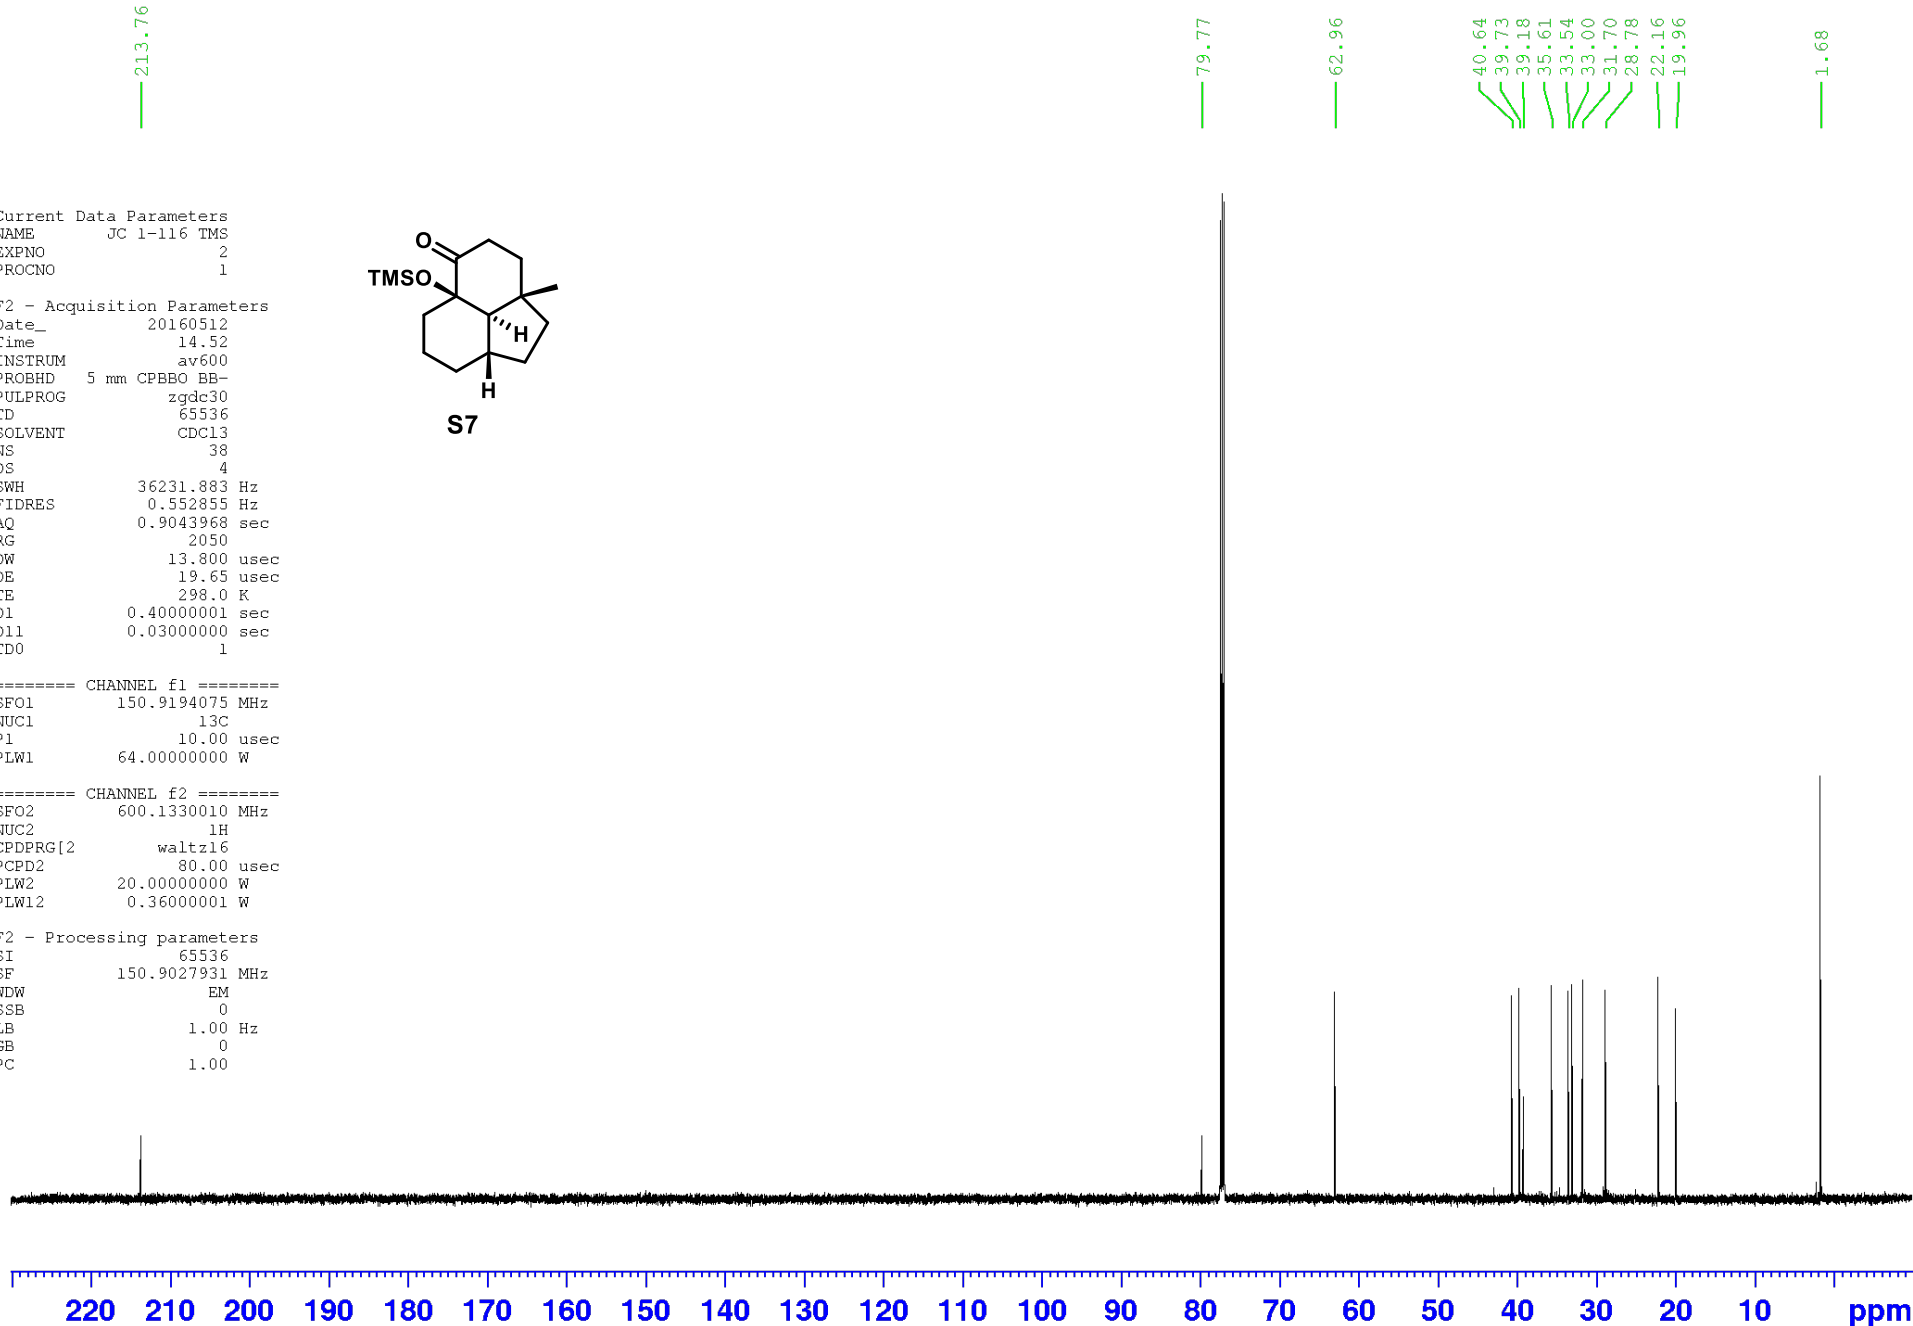

5.78  
5.78  
5.77  
5.77  
2.31  
2.30  
2.27  
2.26  
2.17  
2.16  
2.13  
2.13  
2.05  
2.04  
2.04  
2.03  
2.03  
2.02  
2.02  
2.01  
2.01  
2.00  
2.00  
2.00  
1.98  
1.97  
1.96  
1.96  
1.95  
1.94  
1.94  
1.93  
1.93  
1.92  
1.92  
1.91  
1.90  
1.90  
1.89  
1.89  
1.68  
1.67  
1.66  
1.66  
1.65  
1.65  
1.65  
1.64  
1.63  
1.63  
1.62  
1.58  
1.57  
1.55  
1.55  
1.55  
1.54  
1.53  
1.45  
1.43  
1.42  
1.41  
1.40  
1.39  
1.30  
1.30  
1.29  
1.29  
1.28  
1.27  
1.27  
1.27  
1.26  
1.25  
1.24  
1.23  
1.22  
1.17  
1.15  
1.05  
1.03  
1.02  
1.01  
0.99  
0.98  
0.97  
0.96  
0.12

Current Data Parameters  
NAME JC 1-112 Otf KHMDS  
EXPNO 1  
PROCNO 1

F2 - Acquisition Parameters  
Date\_ 20160510  
Time 22.54  
INSTRUM gn500  
PROBHD 5 mm broadband  
PULPROG zg30  
TD 81728  
SOLVENT CDCl3  
NS 8  
DS 2  
SWH 8012.820 Hz  
FIDRES 0.098043 Hz  
AQ 5.0998273 sec  
RG 812.7  
DW 62.400 usec  
DE 6.00 usec  
TE 298.0 K  
D1 0.10000000 sec  
MCREST 0 sec  
MCWRK 0.01500000 sec

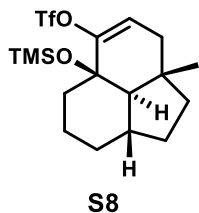

===== CHANNEL f1 =====  
NUC1 1H  
P1 12.00 usec  
PL1 -5.80 dB  
SFO1 499.0734935 MHz

F2 - Processing parameters  
SI 65536  
SF 499.0700313 MHz  
WDW EM  
SSB 0  
LB 0.30 Hz  
GB 0  
PC 1.00

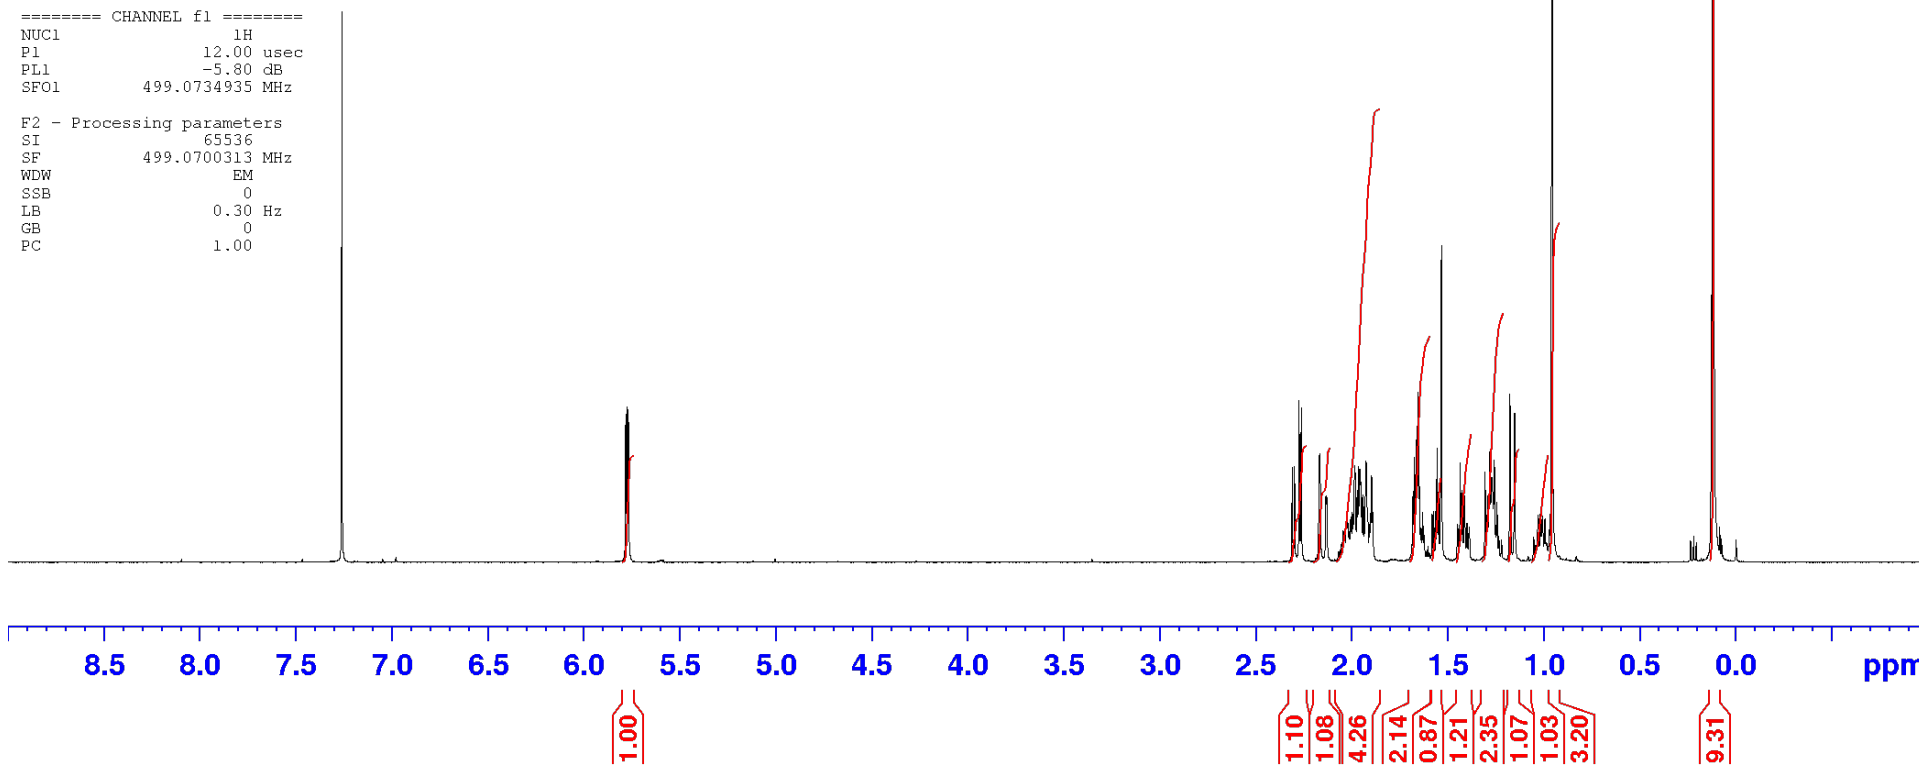

Current Data Parameters  
NAME JC 1-111 OTf pub  
EXPNO 2  
PROCNO 1

F2 - Acquisition Parameters  
Date\_ 20160820  
Time 1.45  
INSTRUM av600  
PROBHD 5 mm CPBBO BB-  
PULPROG zgdc30  
TD 65536  
SOLVENT CDCl3  
NS 277  
DS 4  
SWH 36231.883 Hz  
FIDRES 0.552855 Hz  
AQ 0.9043968 sec  
RG 2050  
DW 13.800 usec  
DE 19.65 usec  
TE 298.0 K  
D1 2.00000000 sec  
D11 0.03000000 sec  
TD0 1

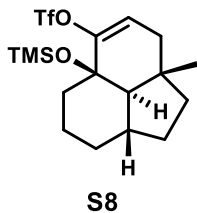

121.74  
120.84  
119.63  
117.51  
115.39

73.20

60.66  
60.51

40.28  
39.83  
37.49  
34.45  
33.23  
33.17  
28.97  
22.07  
21.66

1.54

==== CHANNEL f1 =====  
SFO1 150.9194075 MHz  
NUC1 13C  
P1 10.00 usec  
PLW1 64.00000000 W  
  
==== CHANNEL f2 =====  
SFO2 600.1330010 MHz  
NUC2 1H  
CPDPRG[2] waltz16  
PCPD2 80.00 usec  
PLW2 20.00000000 W  
PLW12 0.36000001 W

F2 - Processing parameters  
SI 65536  
SF 150.9027921 MHz  
WDW EM  
SSB 0  
LB 1.00 Hz  
GB 0  
PC 1.00

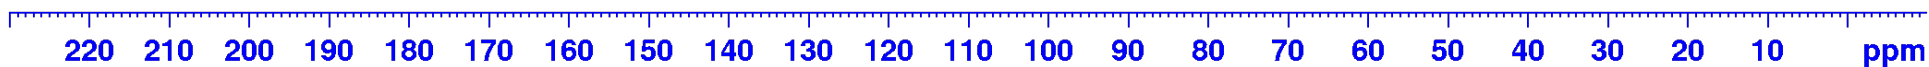



Current Data Parameters  
NAME JC 1-126 A1  
EXPNO 1  
PROCNO 1

F2 - Acquisition Parameters  
Date\_ 20160517  
Time 19.53  
INSTRUM cryo500  
PROBHD 5 mm CPTCI 1H-  
PULPROG zg30  
TD 81728  
SOLVENT CDC13  
NS 8  
DS 2  
SWH 8012.820 Hz  
FIDRES 0.098043 Hz  
AQ 5.0998273 sec  
RG 6.3  
DW 62.400 usec  
DE 6.00 usec  
TE 298.0 K  
D1 0.1000000 sec  
MCREST 0 sec  
MCWRK 0.0150000 sec

==== CHANNEL f1 =====  
NUC1 1H  
P1 7.50 usec  
PL1 1.60 dB  
SFO1 500.2235015 MHz

F2 - Processing parameters  
SI 65536  
SF 500.2200319 MHz  
WDW EM  
SSB 0  
LB 0.30 Hz  
GB 0  
PC 4.00

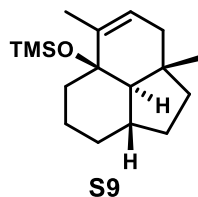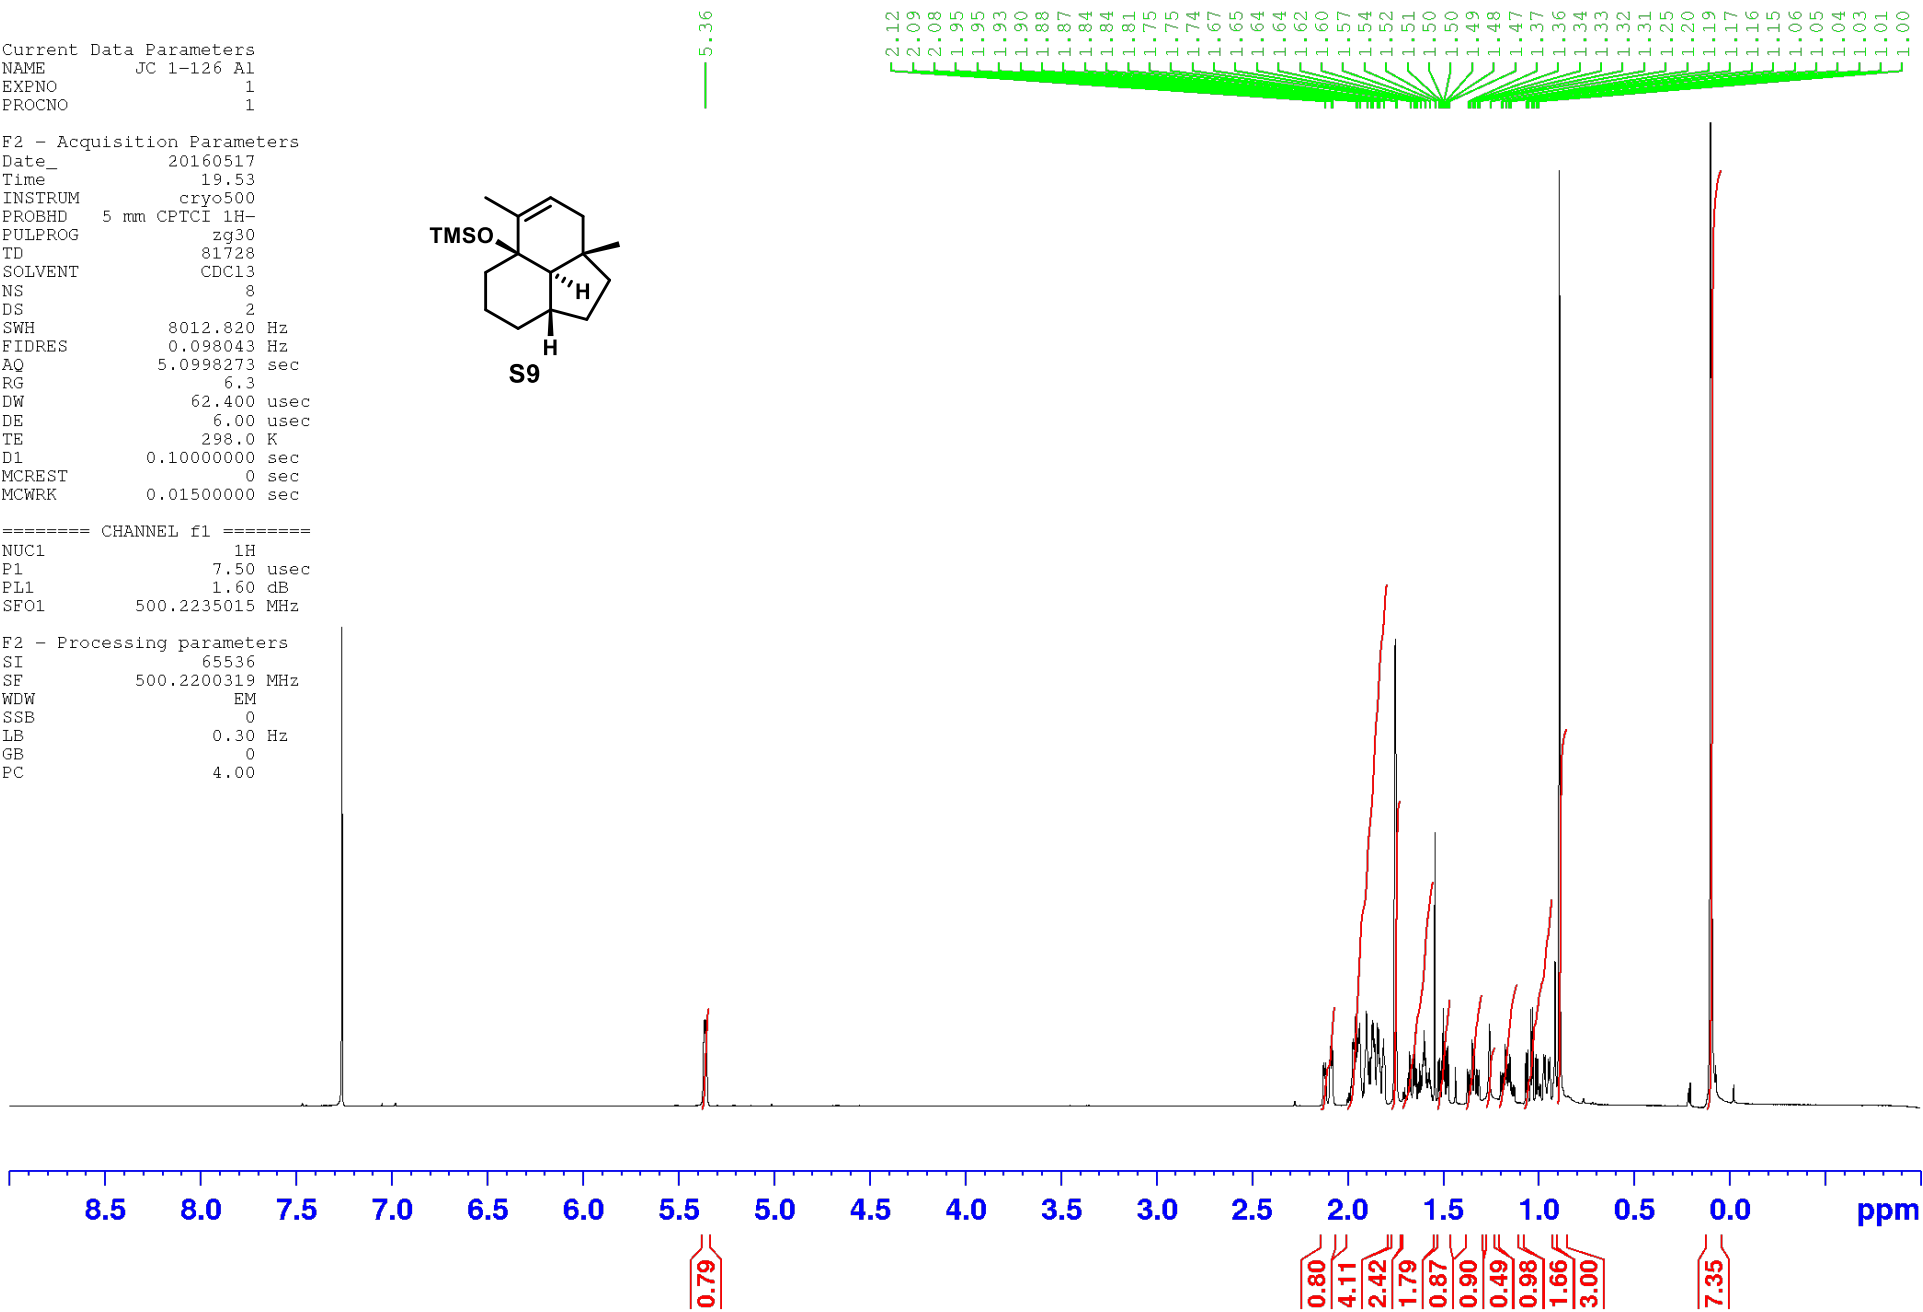

Current Data Parameters  
NAME JC L-126 A1  
EXPNO 2  
PROCNO 1

F2 - Acquisition Parameters  
Date\_ 20160517  
Time 19.55  
INSTRUM cryo500  
PROBHD 5 mm CPTCI 1H-  
PULPROG SpinEcho30pp.prd  
TD 65536  
SOLVENT COCL3  
NS 45  
DS 16  
SWH 30303.031 Hz  
FIDRES 0.462388 Hz  
AQ 1.0813440 sec  
RG 2298.8  
DM 16.500 usec  
DE 6.00 usec  
TE 298.0 K  
D1 1.00000000 sec  
d11 0.03000000 sec  
D16 0.00020000 sec  
d17 0.00019600 sec  
MCREST 0 sec  
MCWRSK 0.01500000 sec  
F2 33.10 usec

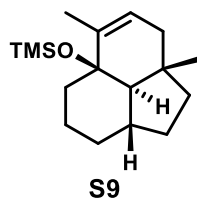

----- CHANNEL f1 -----  
NUC1 13C  
P1 16.55 usec  
P11 500.00 usec  
P12 2000.00 usec  
PL0 120.00 dB  
PL1 -1.00 dB  
SFO1 125.7942548 MHz  
SE1 2.70 dB  
SE2 2.70 dB  
SFO2 125.7942548 MHz  
SFO1 [1] Crp60,0.5,20.1  
SFO1 [2] Crp60comp.4  
SFOF1 0 Hz  
SFOF2 0 Hz

----- CHANNEL F2 -----  
CPDPRG2 waltz16  
NUC2 1H  
PCPD2 100.00 usec  
PL2 1.60 dB  
PL12 24.50 dB  
SFO2 500.2225011 MHz

----- GRADIENT CHANNEL -----  
GENAM [1] SINE.100  
GENAM [2] SINE.100  
GPX1 0 %  
GPX2 0 %  
GPY1 0 %  
GPY2 0 %  
GPZ1 30.00 %  
GPZ2 50.00 %  
p15 500.00 usec  
p16 1000.00 usec

F2 - Processing parameters  
SI 65536  
SF 125.7804074 MHz  
WDW EM  
SSB 0  
LB 1.00 Hz  
GB 0  
PC 2.00

136.82

125.92

74.09

59.81

42.71

40.77

37.60

36.06

33.81

33.73

28.61

22.75

22.06

17.98

2.35

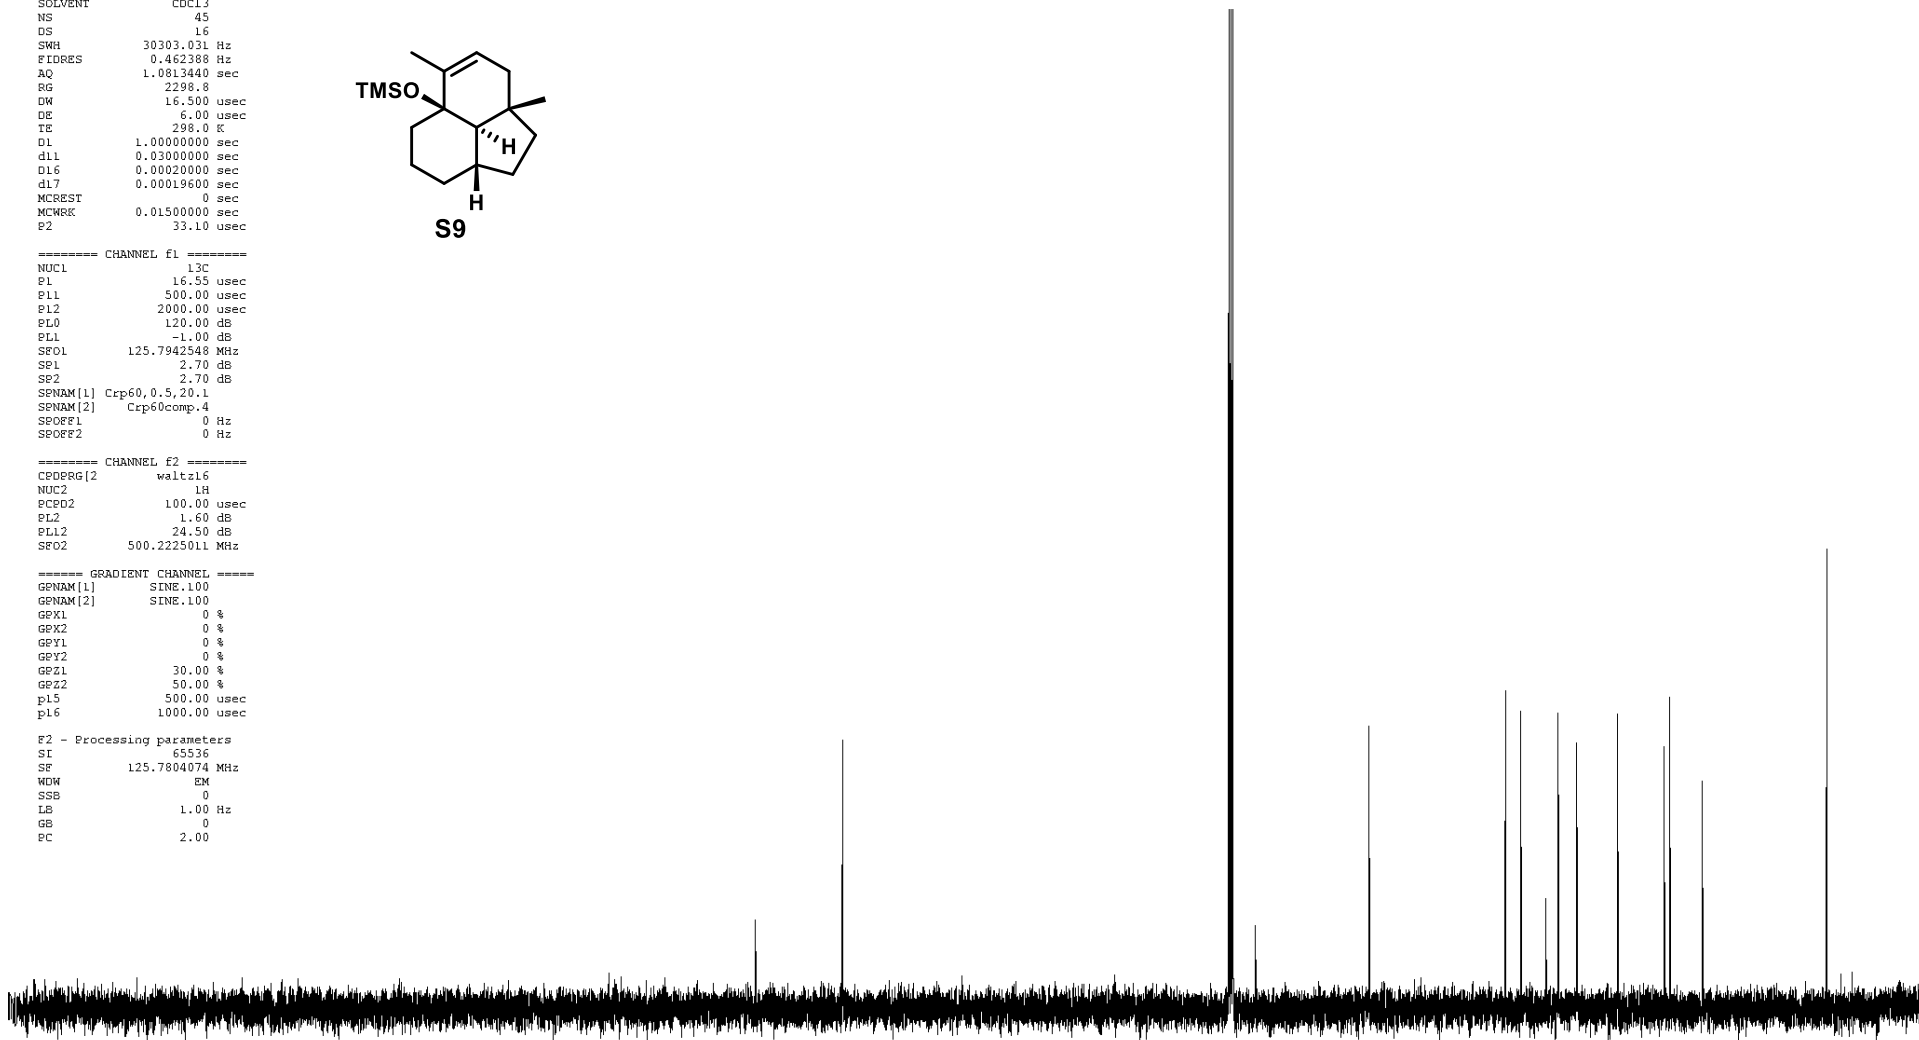

220 210 200 190 180 170 160 150 140 130 120 110 100 90 80 70 60 50 40 30 20 10 ppm

S90

5.39  
5.38  
5.38  
5.38  
2.15  
2.14  
2.14  
2.13  
2.11  
2.11  
2.10  
2.10  
2.03  
2.02  
2.02  
2.01  
2.00  
2.00  
1.98  
1.98  
1.97  
1.97  
1.94  
1.93  
1.93  
1.93  
1.92  
1.91  
1.91  
1.90  
1.90  
1.89  
1.88  
1.87  
1.86  
1.86  
1.85  
1.84  
1.83  
1.82  
1.74  
1.74  
1.74  
1.71  
1.71  
1.70  
1.69  
1.68  
1.67  
1.67  
1.66  
1.66  
1.65  
1.65  
1.65  
1.57  
1.56  
1.55  
1.54  
1.53  
1.52  
1.52  
1.44  
1.43  
1.42  
1.40  
1.39  
1.38  
1.28  
1.26  
1.25  
1.24  
1.24  
1.23  
1.22  
1.21  
1.20  
1.14  
1.13  
1.12  
1.11  
1.09  
1.08  
1.07  
1.02  
1.01  
1.00  
1.00  
0.95

Current Data Parameters  
NAME JC 1-143 TBAF  
EXPNO 1  
PROCNO 1

F2 - Acquisition Parameters  
Date\_ 20160527  
Time 20.29  
INSTRUM cryo500  
PROBHD 5 mm CPTCI 1H-  
PULPROG zg30  
TD 81728  
SOLVENT CDC13  
NS 8  
DS 2  
SWH 8012.820 Hz  
FIDRES 0.098043 Hz  
AQ 5.0998273 sec  
RG 5  
DW 62.400 usec  
DE 6.00 usec  
TE 298.0 K  
D1 0.10000000 sec  
MCREST 0 sec  
MCWRK 0.01500000 sec

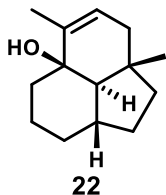

===== CHANNEL f1 =====  
NUC1 1H  
P1 7.50 usec  
PL1 1.60 dB  
SFO1 500.2235015 MHz

F2 - Processing parameters  
SI 65536  
SF 500.2200320 MHz  
WDW EM  
SSB 0  
LB 0.30 Hz  
GB 0  
PC 4.00

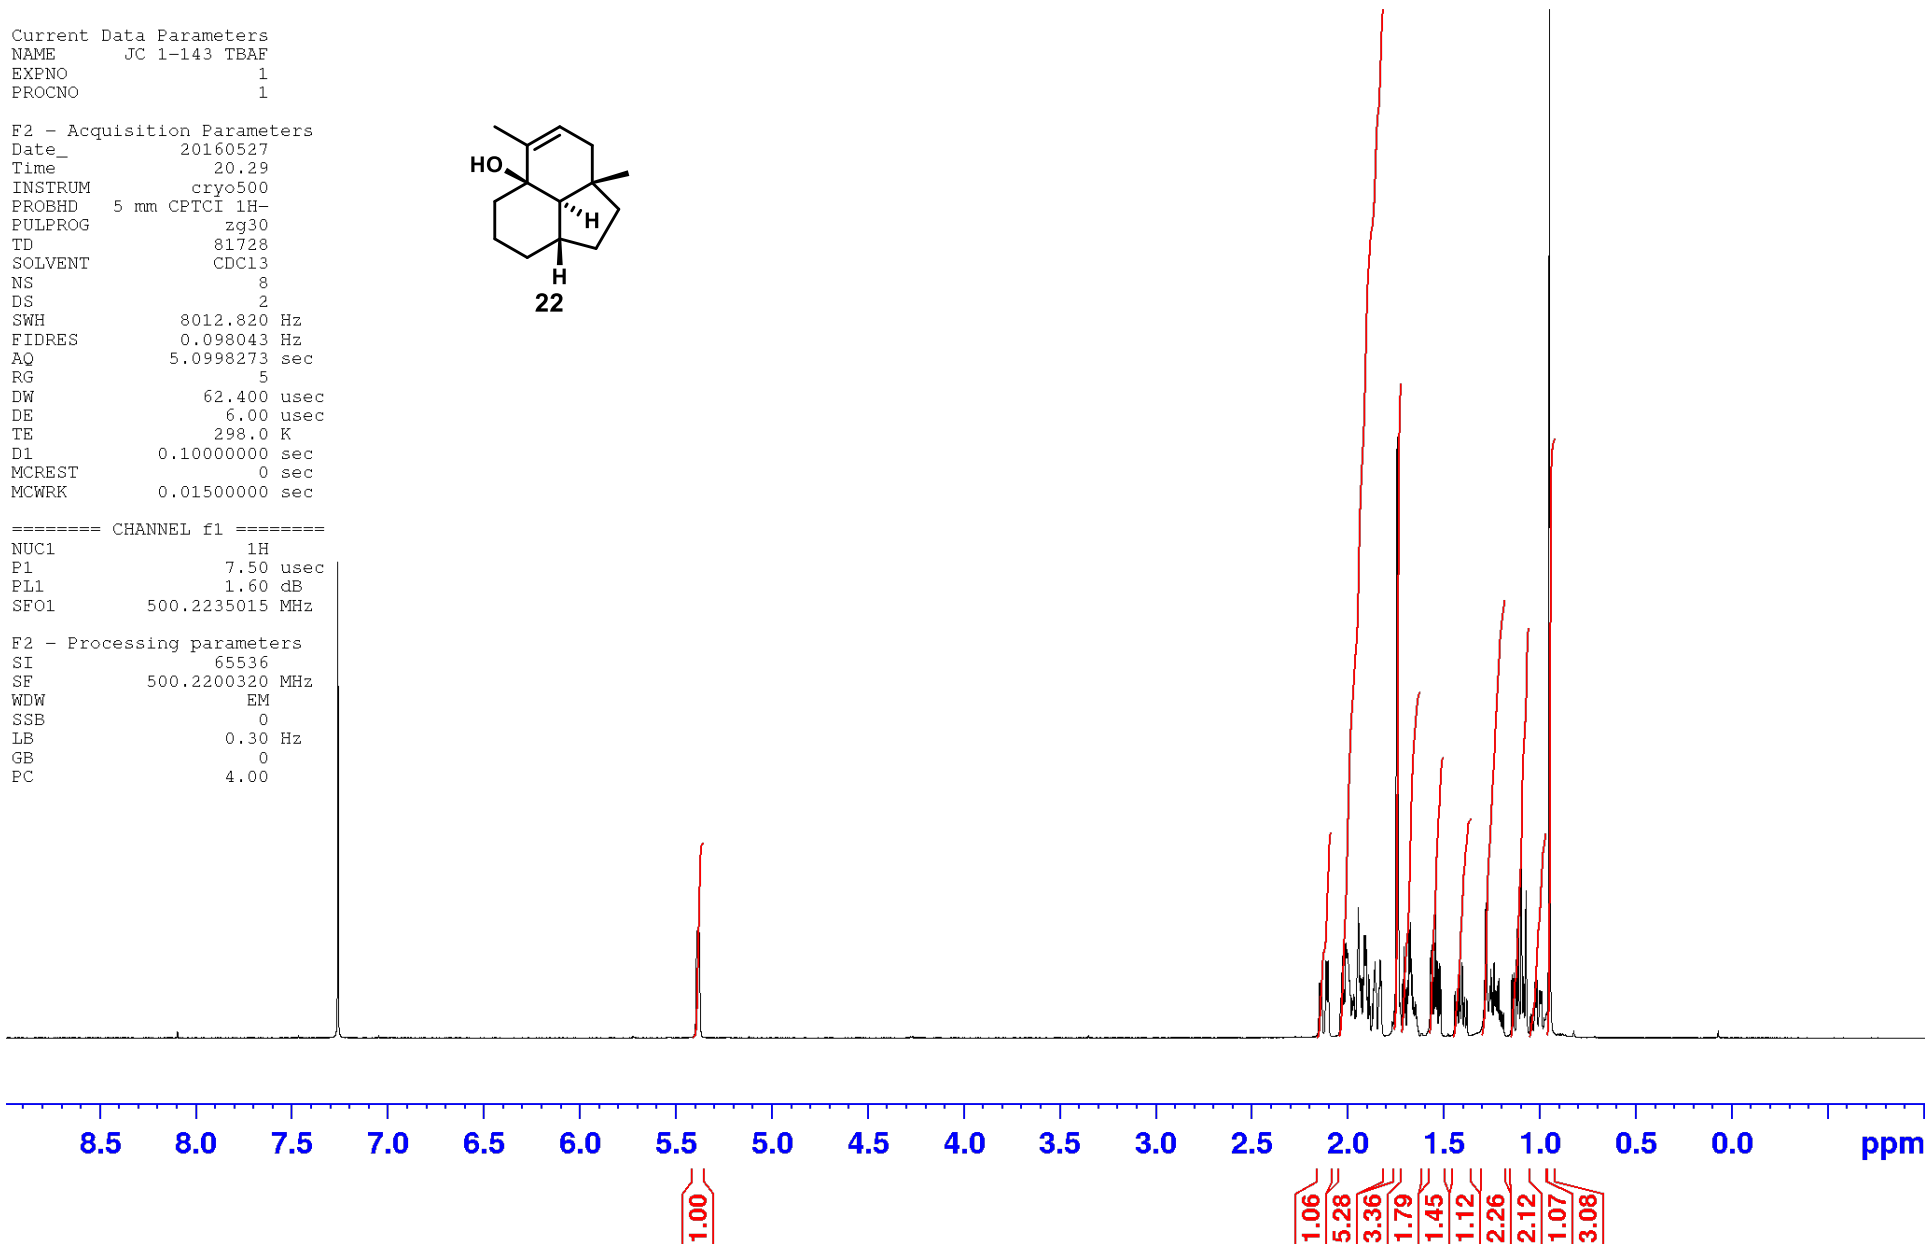

```

Current Data Parameters
NAME      JC 1-179 TBAF
EXPNO     2
PROCNO    1

F2 - Acquisition Parameters
Date_     20160622
Time      18.54
INSTRUM   cryo500
PROBHD    5 mm CPTCI 1H-
PULPROG   SpinEchopg30gp.prd
TD         65536
SOLVENT   CDCl3
NS         55
DS         16
SWH        30303.031 Hz
FIDRES     0.462388 Hz
AQ         1.0813440 sec
RG         3251
DW         16.500 usec
DE         6.00 usec
TE         298.0 K
D1         0.25000000 sec
d11        0.03000000 sec
D16        0.00020000 sec
d17        0.00019600 sec
MCREST     0 sec
MCWRK     0.01500000 sec
F2         33.10 usec

```

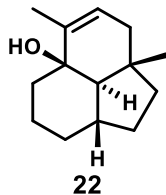

```

===== CHANNEL f1 =====
NUC1      13C
P1        16.55 usec
P11       500.00 usec
P12       2000.00 usec
PL0       120.00 dB
PL1       -1.00 dB
SFO1     125.7942548 MHz
SP1       2.70 dB
SP2       2.70 dB
SFOFF[1] Crp60, 0.5, 20.1
SFOFF[2] Crp60comp, 4
SPOFF1    0 Hz
SPOFF2    0 Hz

```

```

===== CHANNEL f2 =====
CPDPRG[2] waltz16
NUC2      1H
PCPD2     100.00 usec
PL2       1.60 dB
PL12      24.50 dB
SFO2     500.2225011 MHz

```

```

===== GRADIENT CHANNEL =====
GPNAM[1]  SINE.100
GPNAM[2]  SINE.100
GPX1      0 %
GPX2      0 %
GPY1      0 %
GPY2      0 %
GPZ1      30.00 %
GPZ2      50.00 %
p15       500.00 usec
p16       1000.00 usec

```

```

F2 - Processing parameters
SI         65536
SF         125.7804075 MHz
WDW        EM
SSB        0
LB         1.00 Hz
GB         0
PC         2.00

```

138.13

124.69

71.56

58.63

42.19

40.57

37.61

36.03

33.78

33.71

28.50

22.62

21.58

16.55

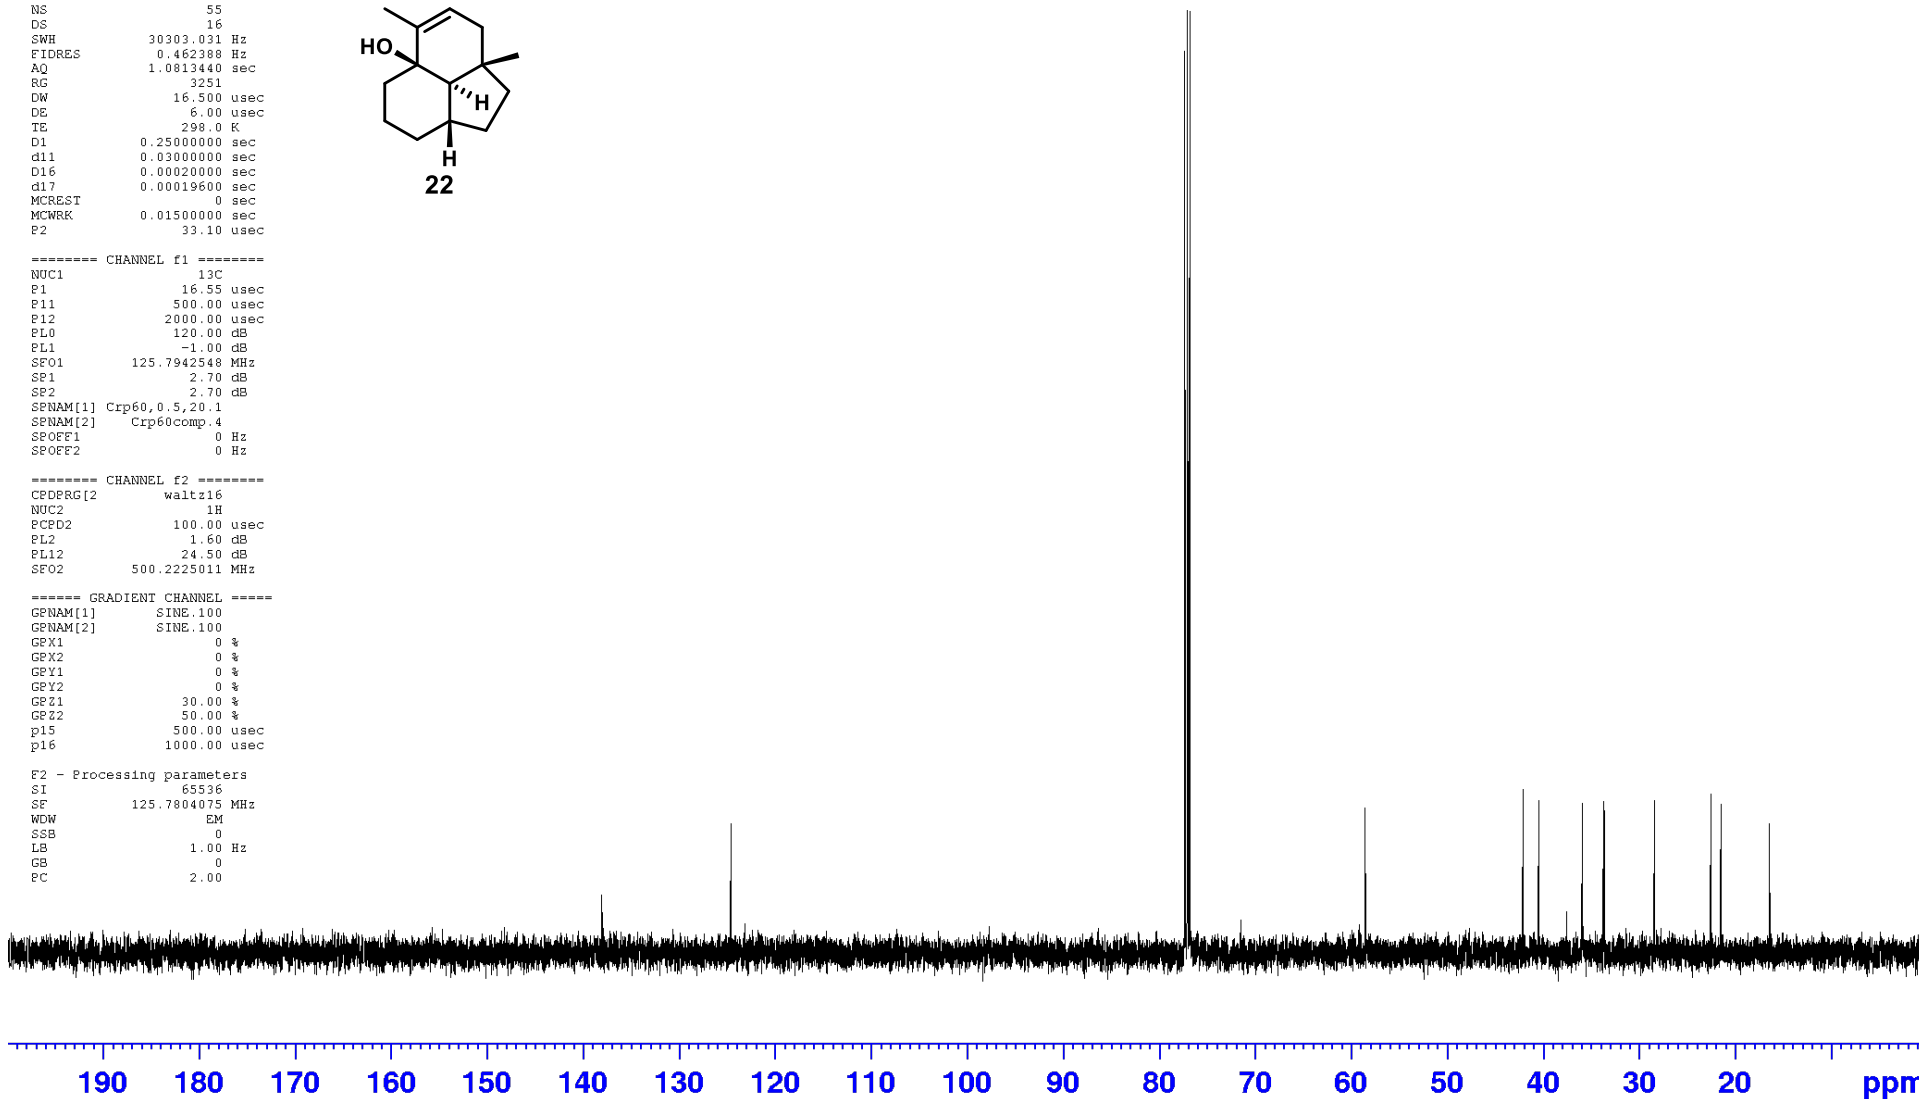

Current Data Parameters  
 NAME JC 1-194 Sn  
 EXPNO 1  
 PROCNO 1

F2 - Acquisition Parameters  
 Date\_ 20160709  
 Time 16.03  
 INSTRUM cryo500  
 PROBHD 5 mm CPTCI 1H-  
 PULPROG zg30  
 TD 81728  
 SOLVENT CDC13  
 NS 8  
 DS 2  
 SWH 8012.820 Hz  
 FIDRES 0.098043 Hz  
 AQ 5.0998273 sec  
 RG 6.3  
 DW 62.400 usec  
 DE 6.00 usec  
 TE 298.0 K  
 D1 0.10000000 sec  
 MCREST 0 sec  
 MCWRK 0.01500000 sec

===== CHANNEL f1 =====  
 NUC1 1H  
 P1 7.50 usec  
 PL1 1.60 dB  
 SFO1 500.2235015 MHz

F2 - Processing parameters  
 SI 65536  
 SF 500.2200313 MHz  
 WDW EM  
 SSB 0  
 LB 0.30 Hz  
 GB 0  
 PC 4.00

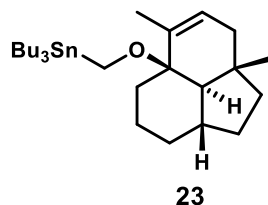

2.13  
2.12  
2.09  
2.08  
2.04  
2.03  
2.02  
2.01  
2.00  
2.00  
1.99  
1.98  
1.97  
1.95  
1.94  
1.93  
1.89  
1.88  
1.86  
1.84  
1.84  
1.82  
1.82  
1.81  
1.57  
1.57  
1.56  
1.55  
1.55  
1.54  
1.53  
1.52  
1.51  
1.49  
1.47  
1.47  
1.46  
1.44  
1.43  
1.43  
1.41  
1.33  
1.30  
1.28

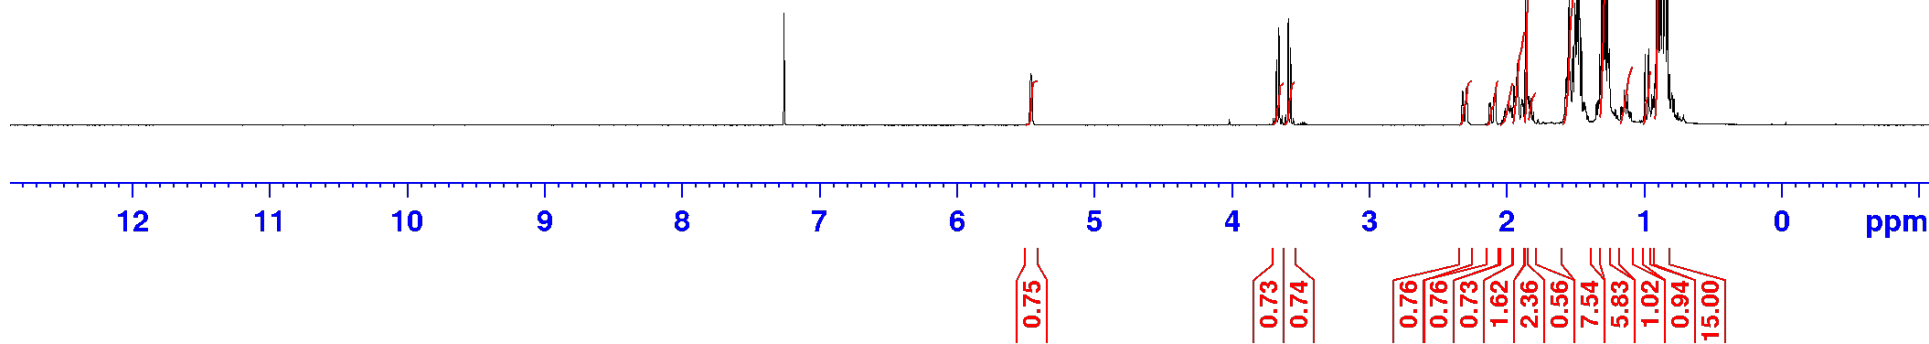

```

Current Data Parameters
NAME      JC 1-194 Sn
EXPNO     2
PROCNO    1

F2 - Acquisition Parameters
Date_     20160709
Time      16.06
INSTRUM   cryo500
PROBHD    5 mm CPTCI 1H-
PULPROG   SpinEchopg30gp.prd
TD         65536
SOLVENT   CDCl3
NS         163
DS         16
SWH        30303.031 Hz
FIDRES     0.462388 Hz
AQ         1.0813440 sec
RG         5792.6
DW         16.500 usec
DE         6.00 usec
TE         298.0 K
D1         0.25000000 sec
d11        0.03000000 sec
D16        0.00020000 sec
d17        0.00019600 sec
MCREST     0
MCWRK     0.01500000 sec
P2         33.10 usec

----- CHANNEL F1 -----
NUC1       13C
P1         16.55 usec
P11        500.00 usec
P12        2000.00 usec
PL0        120.00 dB
PL1        -1.00 dB
SFO1       125.7942548 MHz
SF1        2.70 dB
SF2        2.70 dB
SPNAM[1]   Crp60,0.5,20.1
SPNAM[2]   Crp60comp.4
SPOFF1     0 Hz
SPOFF2     0 Hz

----- CHANNEL F2 -----
CPDPRG[2]  waltz16
NUC2       1H
PCPD2      100.00 usec
PL2        1.60 dB
PL12       24.50 dB
SFO2       500.2225011 MHz

----- GRADIENT CHANNEL -----
GPNAM[1]   SINE.100
GPNAM[2]   SINE.100
GPX1       0 %
GPX2       0 %
GPY1       0 %
GPY2       0 %
GPZ1       30.00 %
GPZ2       50.00 %
p15        500.00 usec
p16        1000.00 usec

F2 - Processing parameters
SI         65536
SF         125.7804070 MHz
WDW        EM
SSB        0
LB         1.00 Hz
GB         0
PC         2.00

```

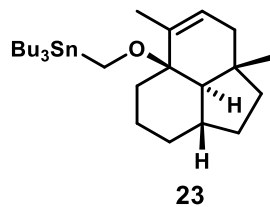

136.11

127.73

75.88

59.93

52.95

43.14

40.84

37.46

33.81

33.79

29.87

29.39

29.31

28.72

27.60

23.18

22.79

20.93

13.87

8.90

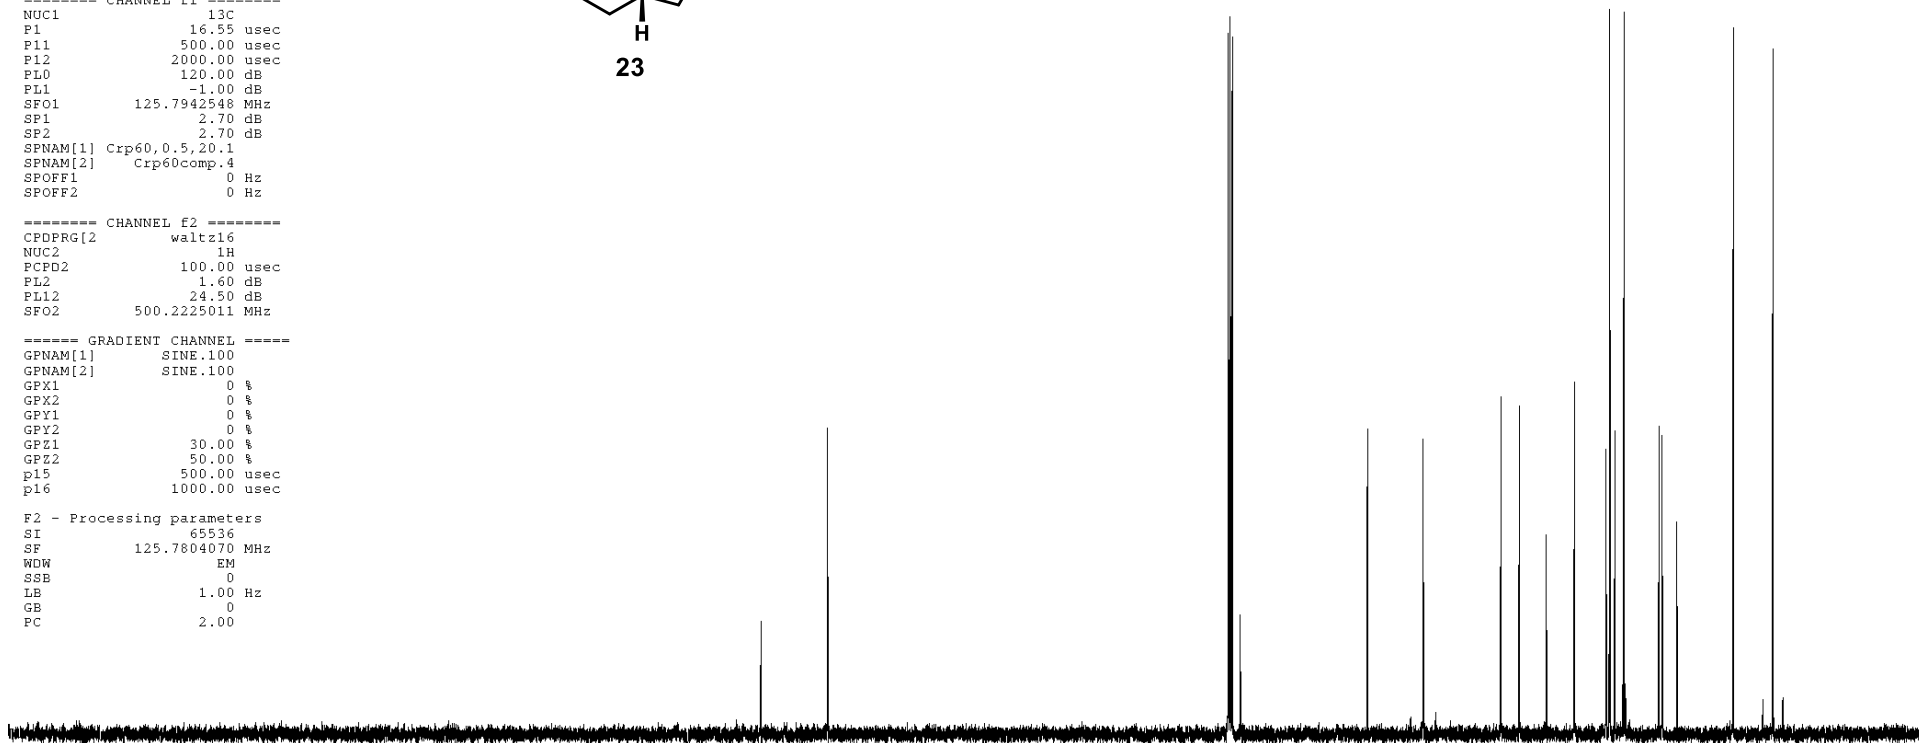

220 210 200 190 180 170 160 150 140 130 120 110 100 90 80 70 60 50 40 30 20 10 ppm

5.34  
5.33  
5.33  
5.33  
3.92  
3.90  
3.84  
3.82  
3.22  
2.21  
2.21  
2.19  
2.19  
2.18  
2.10  
2.10  
2.09  
2.06  
2.06  
2.05  
2.04  
2.02  
2.02  
1.98  
1.91  
1.90  
1.89  
1.89  
1.88  
1.87  
1.86  
1.85  
1.84  
1.83  
1.78  
1.77  
1.69  
1.68  
1.68  
1.67  
1.66  
1.66  
1.65  
1.56  
1.55  
1.54  
1.54  
1.53  
1.52  
1.51  
1.49  
1.49  
1.47  
1.46  
1.45  
1.44  
1.43  
1.42  
1.40  
1.40  
1.39  
1.38  
1.36  
1.35  
1.34  
1.25  
1.23  
1.22  
1.21  
1.20  
1.20  
1.19  
1.19  
1.18  
1.17  
1.17  
1.16  
1.01  
1.01  
0.99  
0.98  
0.97  
0.96  
0.95  
0.93  
0.92  
0.85

Current Data Parameters  
NAME JC 2-150 1,2  
EXPNO 1  
PROCNO 1

F2 - Acquisition Parameters  
Date\_ 20161224  
Time 9.12  
INSTRUM cryo500  
PROBHD 5 mm CPIC1 1H-  
PULPROG zg30  
TD 81728  
SOLVENT CDCl3  
NS 8  
DS 2  
SWH 8012.820 Hz  
FIDRES 0.098043 Hz  
AQ 5.0998273 sec  
RG 8  
DW 62.400 usec  
DE 6.00 usec  
TE 298.0 K  
D1 0.10000000 sec  
MCREST 0 sec  
MCNRK 0.01500000 sec

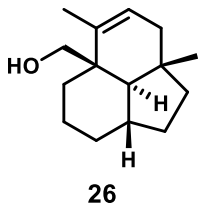

----- CHANNEL f1 -----  
NUC1 1H  
P1 7.50 usec  
PL1 1.60 dB  
SF01 500.2235015 MHz

F2 - Processing parameters  
SI 65536  
SF 500.2200319 MHz  
WDW EM  
SSB 0  
LB 0.30 Hz  
GB 0  
PC 1.00

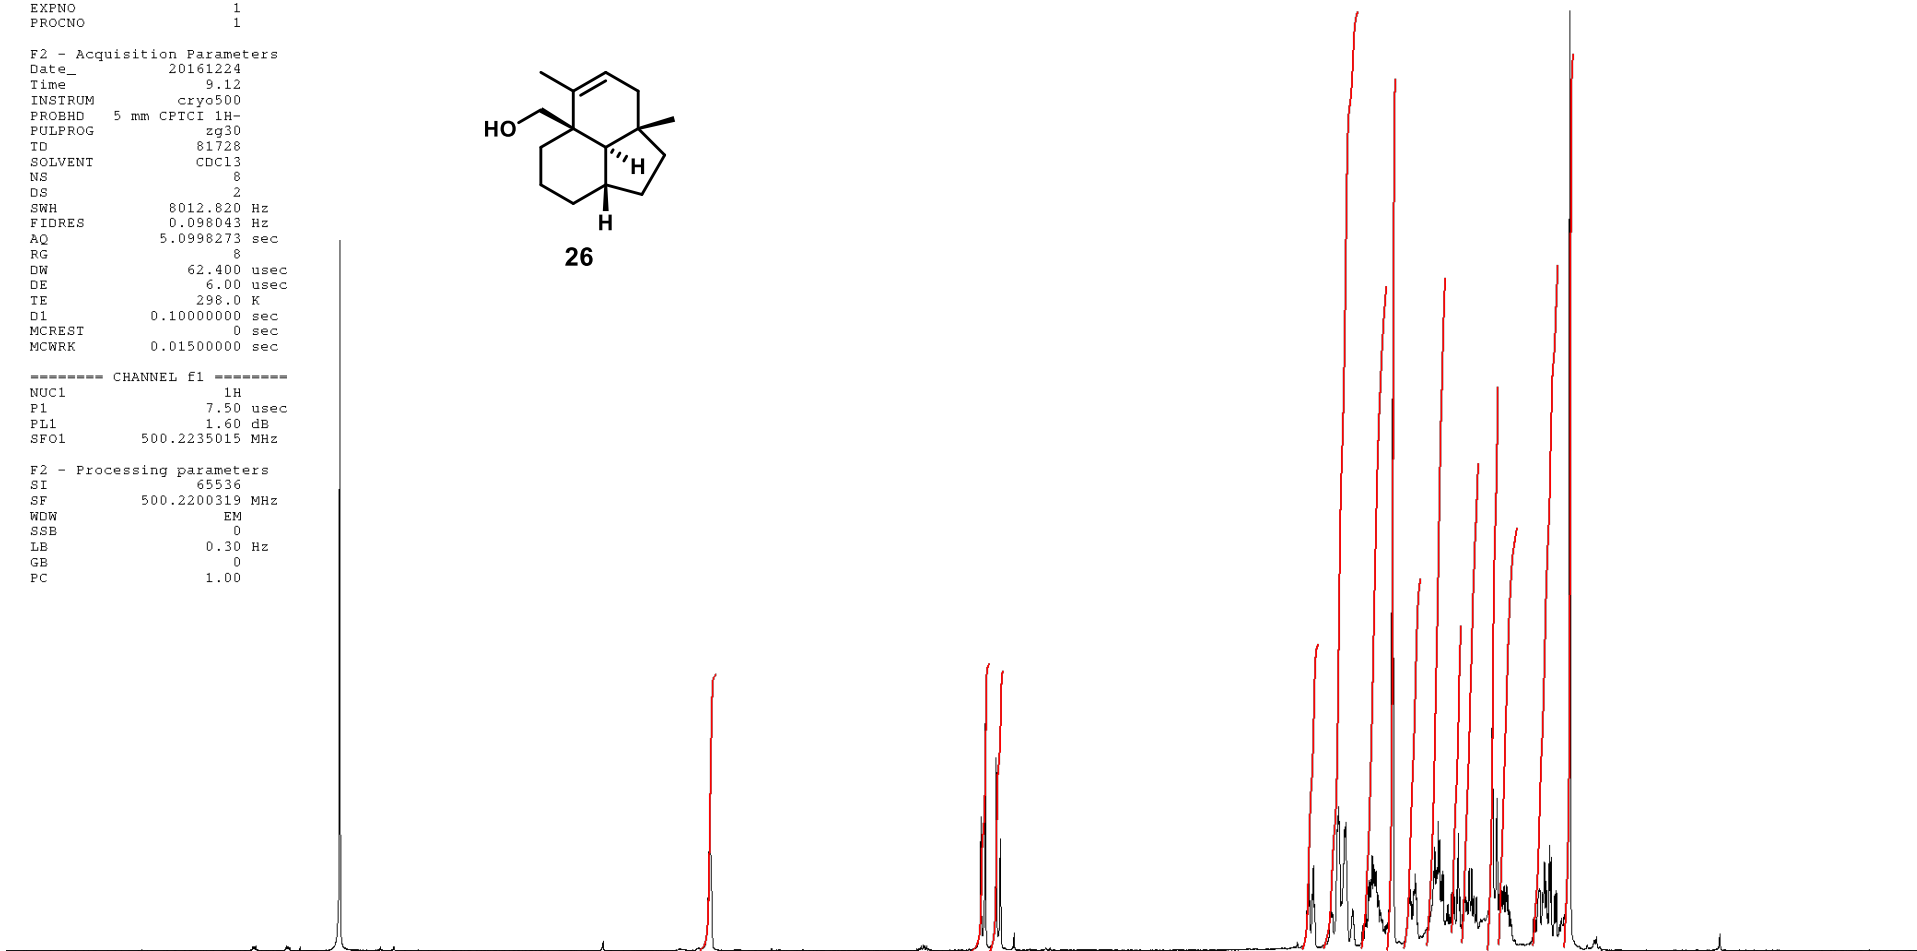

8.5 8.0 7.5 7.0 6.5 6.0 5.5 5.0 4.5 4.0 3.5 3.0 2.5 2.0 1.5 1.0 0.5 0.0 ppm

0.92

0.96  
0.94

1.03  
3.14  
2.26  
2.92  
1.24  
2.27  
1.13  
1.66  
2.00  
1.42  
2.32  
3.00

```

Current Data Parameters
NAME      JC 2-150 1,2
EXPMO     2
PROCNO    1

F2 - Acquisition Parameters
Date_     20161224
Time      9.20
INSTRUM   cryo500
PROBHD    5 mm CPTCI 1H-
PULPROG   SpinEchopg30pp.prd
TD        65536
SOLVENT   CDCl3
NS        142
DS        16
SWH       30303.031 Hz
FIDRES    0.462388 Hz
AQ        1.0813440 sec
RG        3649.1
DW        16.500 usec
DE        6.00 usec
TE        298.0 K
D1        2.00000000 sec
d11       0.03000000 sec
D16       0.00020000 sec
d17       0.00019600 sec
MCREST    0 sec
MCWRK     0.01500000 sec
P2        33.10 usec

```

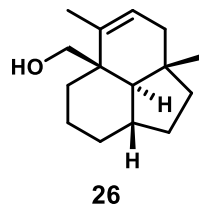

140.34

123.32

64.94

59.83

42.94

42.50

41.93

37.79

34.59

33.89

33.58

28.84

23.17

22.99

19.50

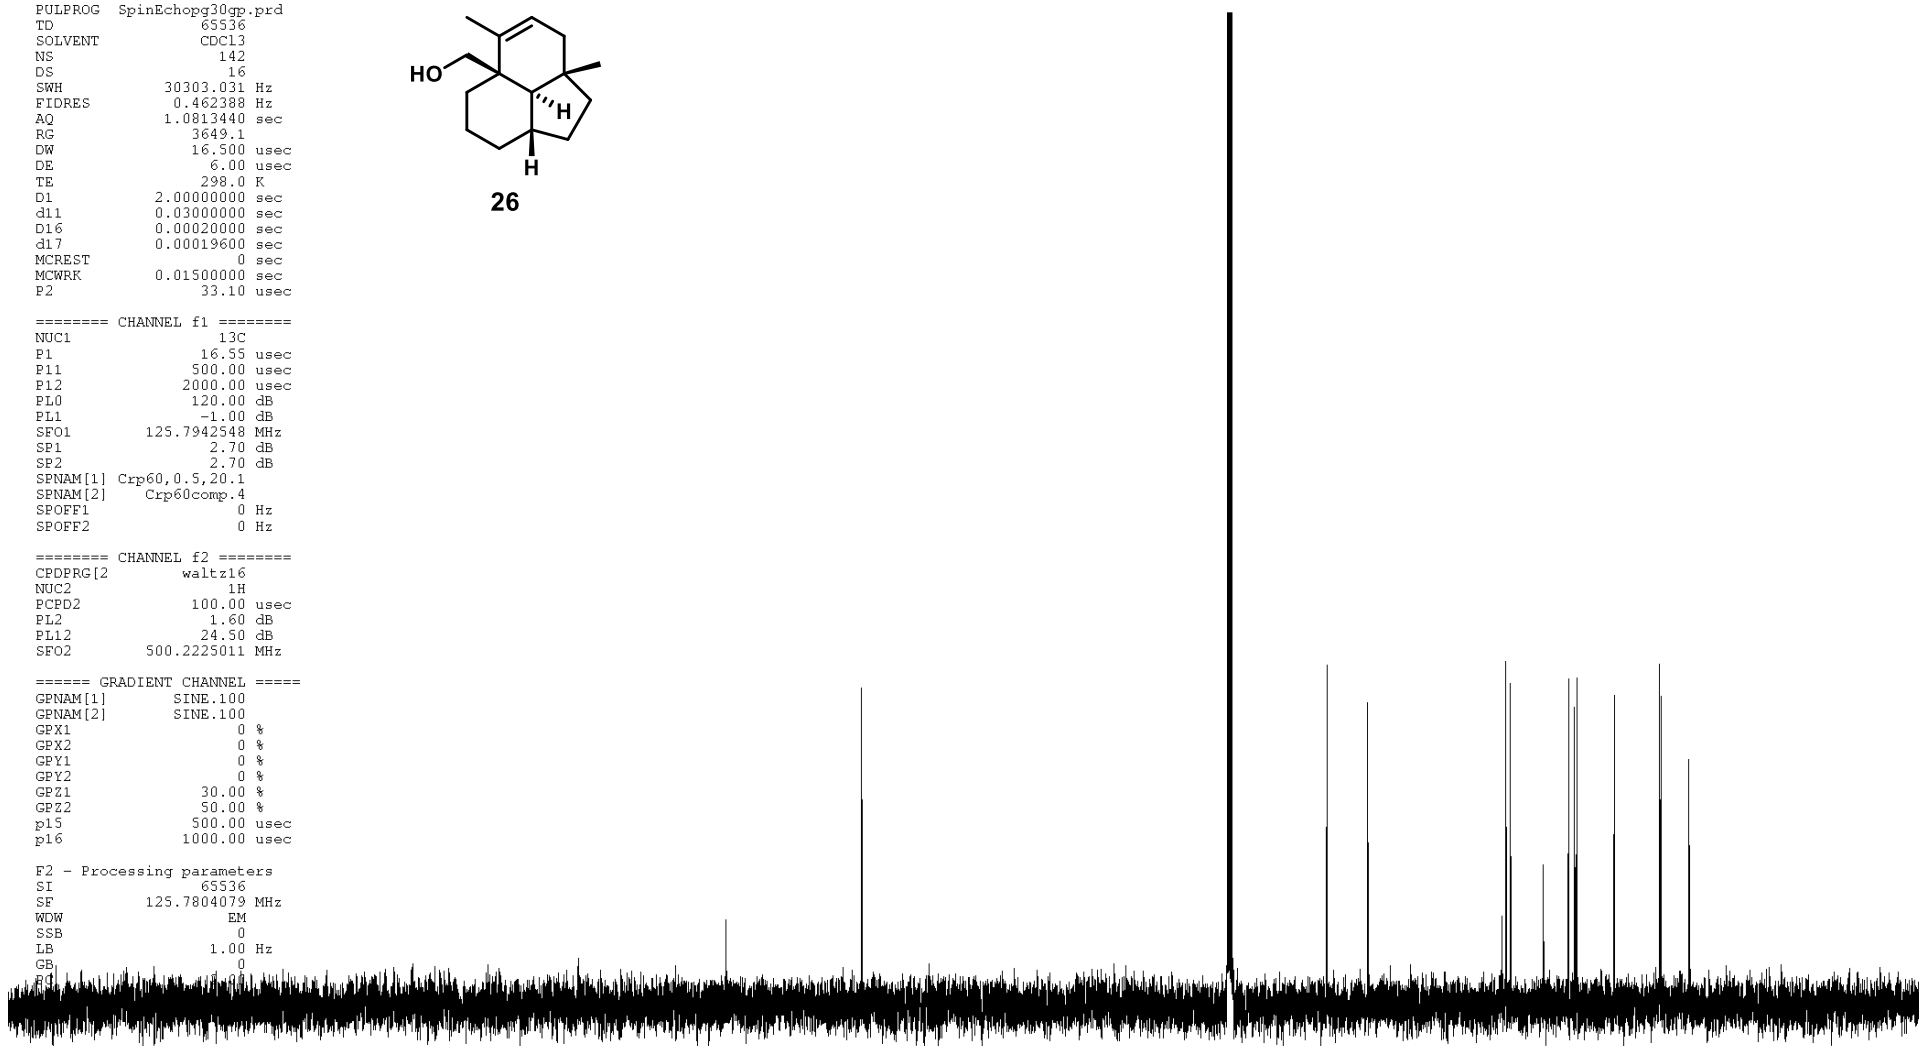

220 210 200 190 180 170 160 150 140 130 120 110 100 90 80 70 60 50 40 30 20 10 ppm



5.87  
5.86  
5.85  
5.85  
5.83  
5.82  
5.81  
5.80  
5.03  
5.02  
4.99  
4.99  
4.92  
4.91  
4.90  
4.89  
4.08  
4.07  
4.06  
4.04  
2.10  
2.09  
2.07  
2.06  
1.92  
1.91  
1.91  
1.90  
1.89  
1.88  
1.88  
1.86  
1.86  
1.73  
1.73  
1.72  
1.71  
1.71  
1.70  
1.70  
1.69  
1.68  
1.68  
1.65  
1.65  
1.63  
1.63  
1.62  
1.62  
1.61  
1.60  
1.60  
1.59  
1.59  
1.58  
1.58  
1.57  
1.56  
1.56  
1.55  
1.54  
1.53  
1.53  
1.52  
1.52  
1.50  
1.50  
1.50  
1.36  
1.35  
1.34  
1.26  
1.25  
1.24  
1.23  
1.22  
1.20  
1.15  
1.12  
1.09  
1.02  
1.00  
0.97  
0.97  
0.95  
0.94  
0.93

Current Data Parameters  
NAME JC 2-104 top CeCl3  
EXPNO 1  
PROCNO 1

F2 - Acquisition Parameters

Date\_ 20161208  
Time 23.39  
INSTRUM cryo500  
PROBHD 5 mm CPTCI 1H-  
PULPROG zg30  
TD 81728  
SOLVENT CDCl3  
NS 8  
DS 2  
SWH 8012.820 Hz  
FIDRES 0.098043 Hz  
AQ 5.0998273 sec  
RG 6.3  
DW 62.400 usec  
DE 6.00 usec  
TE 298.0 K  
D1 0.10000000 sec  
MCREST 0 sec  
MCWRK 0.01500000 sec

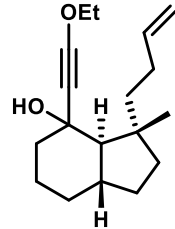

**29, major diastereomer**

==== CHANNEL f1 =====  
NUC1 1H  
P1 7.50 usec  
PL1 1.60 dB  
SF01 500.2235015 MHz

F2 - Processing parameters  
SI 65536  
SF 500.2200317 MHz  
WDW EM  
SSB 0  
LB 0.30 Hz  
GB 0  
PC 1.00

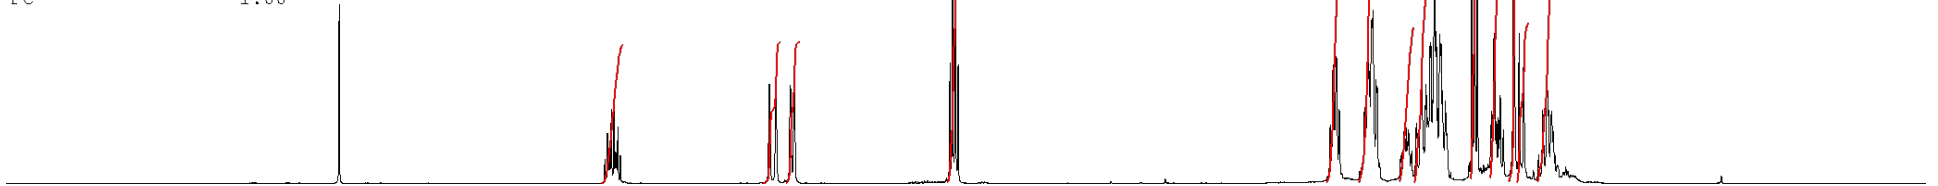

8.5 8.0 7.5 7.0 6.5 6.0 5.5 5.0 4.5 4.0 3.5 3.0 2.5 2.0 1.5 1.0 0.5 0.0 ppm

1.00

1.02

1.02

1.96

2.05

4.04

1.13

6.84

3.03

2.18

2.89

1.16

2.16

Current Data Parameters  
NAME JC 2-104 top CeCl3  
EXPNO 2  
PROCNO 1

F2 - Acquisition Parameters  
Date\_ 20161208  
Time 23.42  
INSTRUM cryo500  
PROBHD 5 mm CPTCI 1H-  
PULPROG SpinEchopg30gp.prd  
TD 65536  
SOLVENT cdcl3  
NS 61  
DS 16  
SWH 30303.031 Hz  
FIDRES 0.462388 Hz  
AQ 1.0813440 sec  
RG 7298.2  
DW 16.500 usec  
DE 6.00 usec  
TE 298.0 K  
D1 1.00000000 sec  
d11 0.03000000 sec  
d16 0.00020000 sec  
d17 0.00019600 sec  
MCREST 0 sec  
MCWRK 0.01500000 sec  
F2 33.10 usec

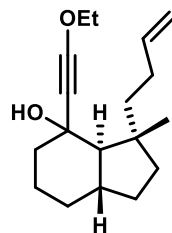

**29**, major  
diastereomer

----- CHANNEL f1 -----  
NUC1 13C  
P1 16.55 usec  
P11 500.00 usec  
P12 2000.00 usec  
PL0 120.00 dB  
PL1 -1.00 dB  
SFO1 125.7942548 MHz  
SP1 2.70 dB  
SP2 2.70 dB  
SPNAM[1] Crp60,0.5,20.1  
SPNAM[2] Crp60comp.4  
SPOFF1 0 Hz  
SPOFF2 0 Hz

----- CHANNEL f2 -----  
CPDPRG[2] waltz16  
NUC2 1H  
PCPD2 100.00 usec  
PL2 1.60 dB  
PL12 24.50 dB  
SFO2 500.2225011 MHz

===== GRADIENT CHANNEL =====  
GPNAM[1] SINE.100  
GPNAM[2] SINE.100  
GPX1 0 %  
GPX2 0 %  
GPY1 0 %  
GPY2 0 %  
GFZ1 30.00 %  
GFZ2 50.00 %  
p15 500.00 usec  
p16 1000.00 usec

F2 - Processing parameters  
SI 65536  
SF 125.7804084 MHz  
WDW EM  
SSB 0  
LB 1.00 Hz  
GB 0  
PC 2.00

140.10  
113.72  
93.24  
74.27  
68.25  
60.13  
44.01  
43.28  
42.83  
38.13  
38.08  
32.82  
29.96  
29.78  
25.20  
21.57  
14.65

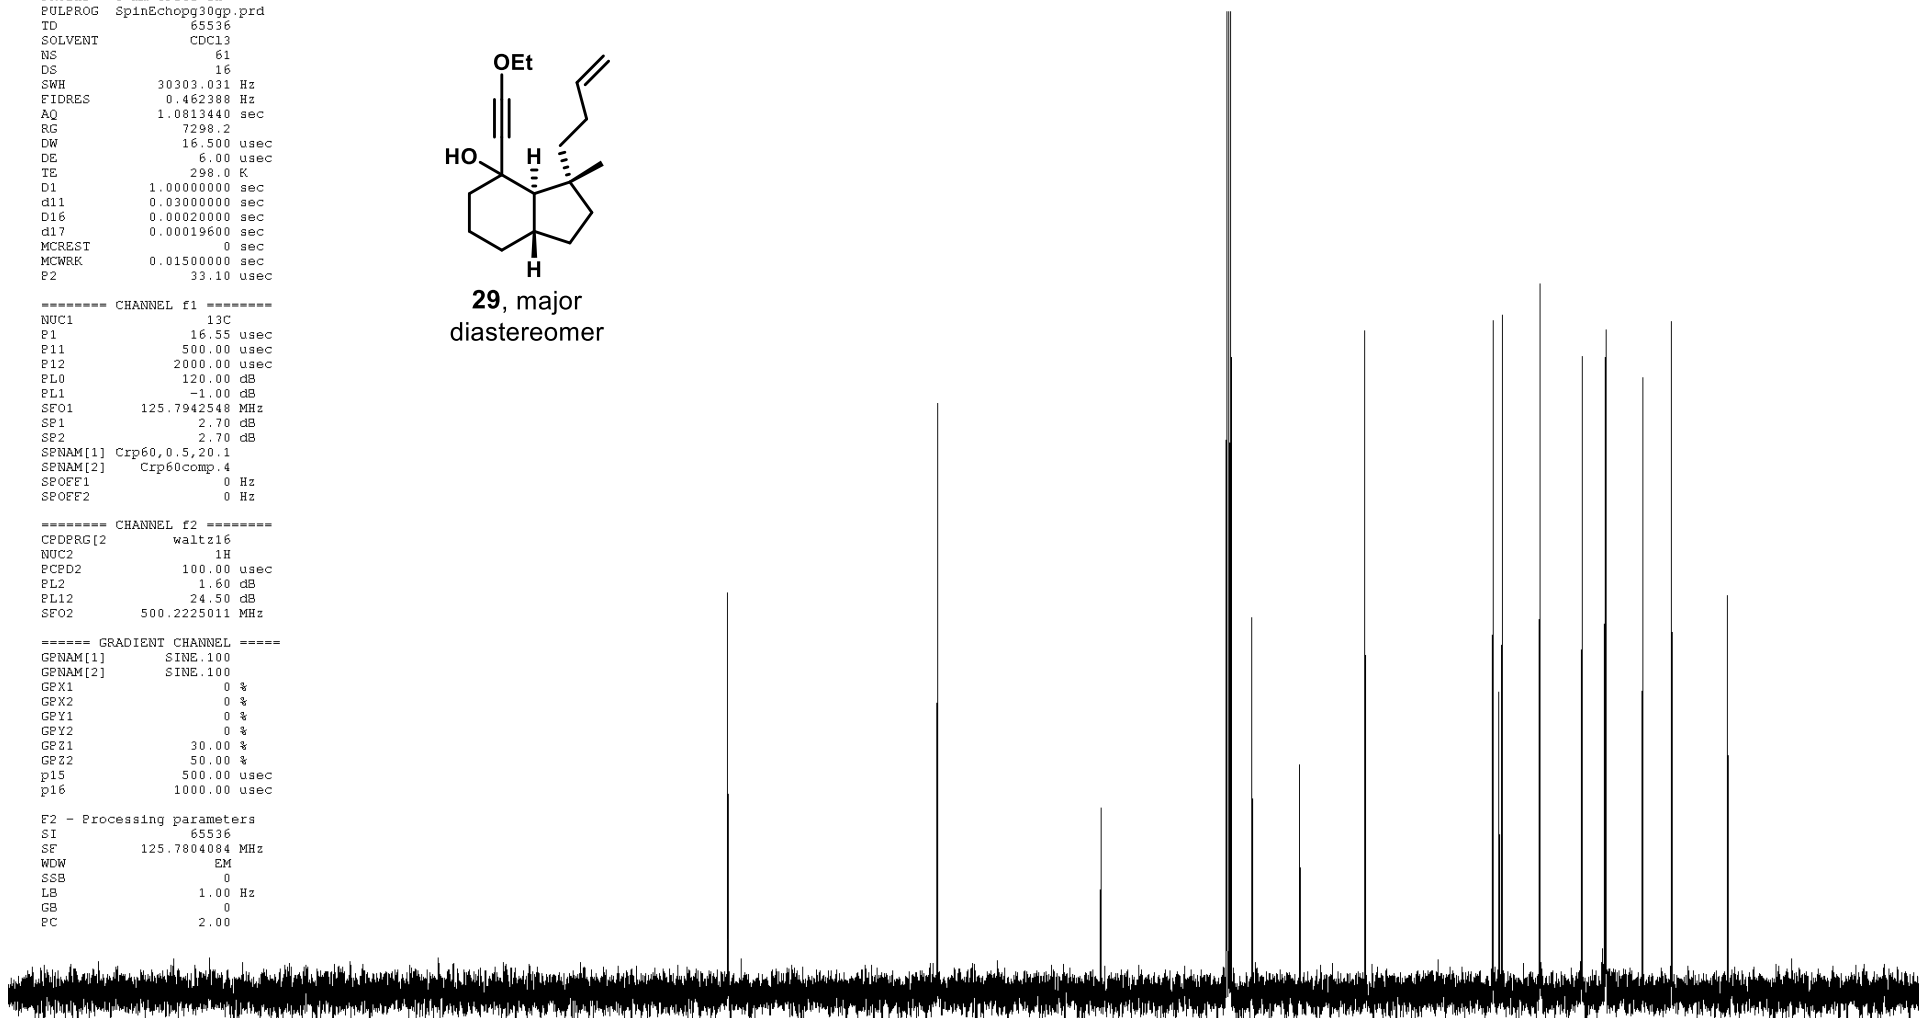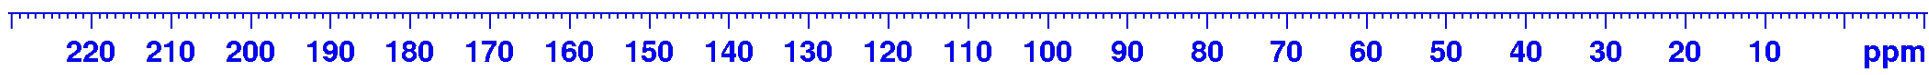

5.87  
5.85  
5.84  
5.83  
5.82  
5.81  
5.80  
5.79  
5.01  
4.98  
4.98  
4.90  
4.88  
4.10  
4.08  
4.07  
4.05  
2.14  
2.12  
2.11  
2.10  
2.09  
2.08  
2.07  
2.05  
2.04  
2.03  
1.85  
1.83  
1.82  
1.81  
1.80  
1.78  
1.76  
1.75  
1.74  
1.73  
1.72  
1.69  
1.66  
1.64  
1.63  
1.61  
1.61  
1.59  
1.59  
1.58  
1.57  
1.56  
1.49  
1.48  
1.47  
1.46  
1.45  
1.44  
1.42  
1.41  
1.40  
1.39  
1.38  
1.36  
1.35  
1.34  
1.30  
1.28  
1.27  
1.26  
1.25  
1.24  
1.20  
1.16  
1.15  
1.14  
1.13  
1.11  
1.09  
1.07  
0.96  
0.95  
0.94  
0.93  
0.91  
0.90  
0.89

Current Data Parameters  
 NAME JC 2-104 bot CeCl3  
 EXPNO 1  
 PROCNO 1  
 F2 - Acquisition Parameters  
 Date\_ 20161208  
 Time 23.56  
 INSTRUM cryo500  
 PROBHD 5 mm CPTCI 1H-  
 PULPROG zg30  
 TD 81728  
 SOLVENT CDC13  
 NS 8  
 DS 2  
 SWH 8012.820 Hz  
 FIDRES 0.098043 Hz  
 AQ 5.0998273 sec  
 RG 5.7  
 DW 62.400 usec  
 DE 6.00 usec  
 TE 298.0 K  
 D1 0.1000000 sec  
 MCREST 0 sec  
 MCWRK 0.0150000 sec

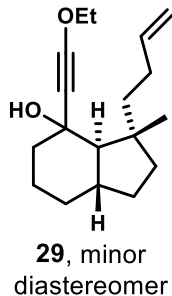

==== CHANNEL f1 =====  
 NUC1 1H  
 P1 7.50 usec  
 PL1 1.60 dB  
 SFO1 500.2235015 MHz  
 F2 - Processing parameters  
 SI 65536  
 SF 500.2200319 MHz  
 WDW EM  
 SSB 0  
 LB 0.30 Hz  
 GB 0  
 PC 1.00

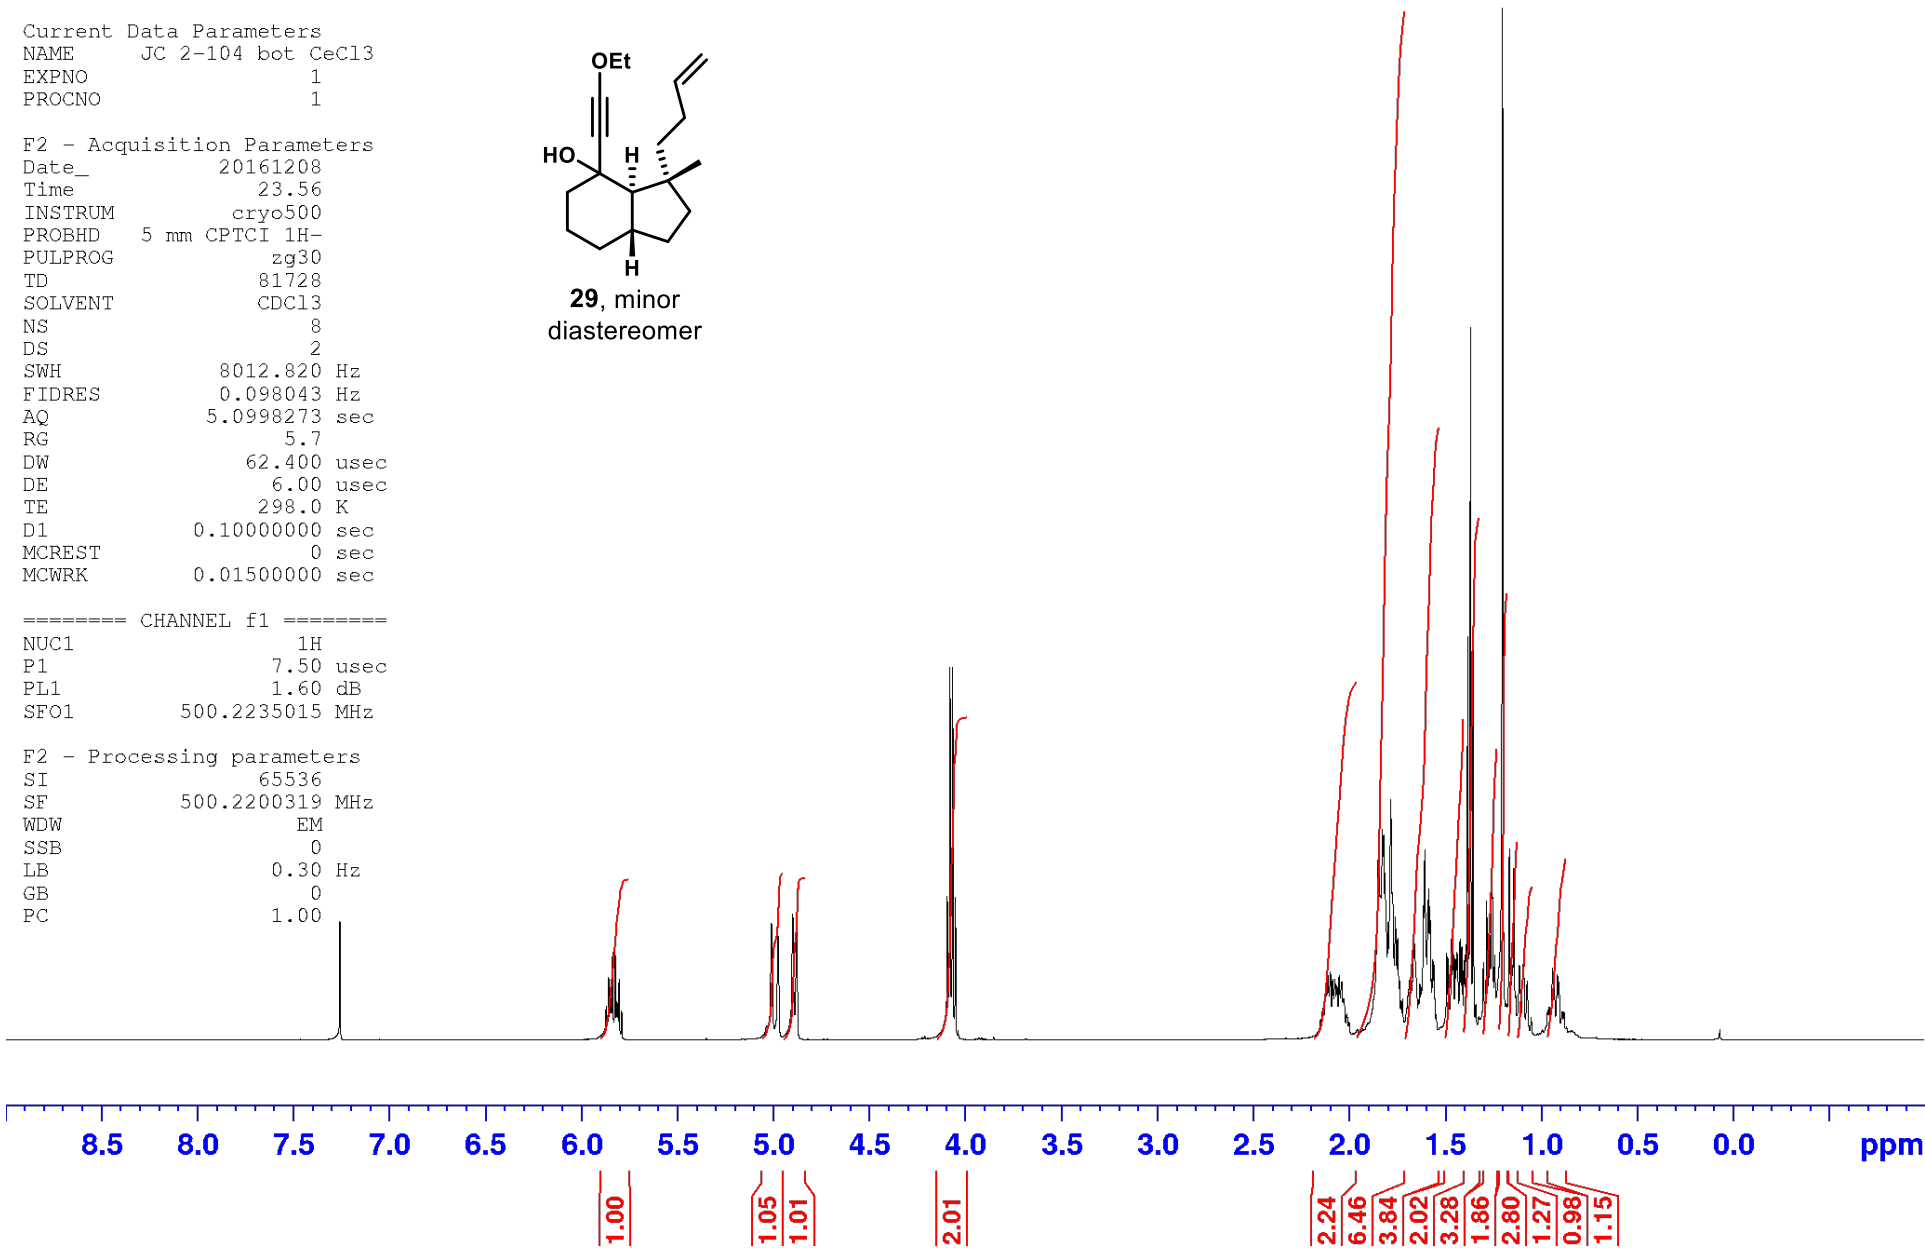

Current Data Parameters  
NAME JC 2-104 bot CeCl3  
EXPNO 2  
PROCNO 1

F2 - Acquisition Parameters  
Date\_ 20161208  
Time 23.59  
INSTRUM cryo500  
PROBHD 5 mm CPTCI 1H-  
PULPROG SpinEchopg30gp.prd  
TD 65536  
SOLVENT CDCl3  
NS 39  
DS 16  
SWH 30303.031 Hz  
FIDRES 0.462388 Hz  
AQ 1.0813440 sec  
RG 6502  
OW 16.500 usec  
DE 6.00 usec  
TE 298.0 K  
D1 1.00000000 sec  
d11 0.03000000 sec  
D16 0.00020000 sec  
d17 0.00019600 sec  
MCREST 0 sec  
MCWRK 0.01500000 sec  
P2 33.10 usec

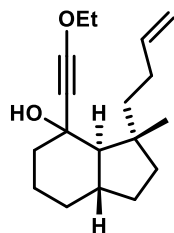

29, minor  
diastereomer

===== CHANNEL f1 =====  
NUC1 13C  
P1 16.55 usec  
PL1 500.00 usec  
PL2 2000.00 usec  
PL0 120.00 dB  
PL1 -1.00 dB  
SFO1 125.7942548 MHz  
SP1 2.70 dB  
SP2 2.70 dB  
SPNAM[1] Crp60,0.5,20.1  
SPNAM[2] Crp60comp.4  
SPOFF1 0 Hz  
SPOFF2 0 Hz

===== CHANNEL f2 =====  
CPDPRG[2] waltz16  
NUC2 1H  
PCPD2 100.00 usec  
PL2 1.60 dB  
PL12 24.50 dB  
SFO2 500.2225011 MHz

===== GRADIENT CHANNEL =====  
GPNAM[1] SINE.100  
GPNAM[2] SINE.100  
GFX1 0 %  
GFX2 0 %  
GPY1 0 %  
GPY2 0 %  
GPZ1 30.00 %  
GPZ2 50.00 %  
p15 500.00 usec  
p16 1000.00 usec

F2 - Processing parameters  
SI 65536  
SF 125.7804090 MHz  
WDW EM  
SSB 0  
LB 1.00 Hz  
GB 0  
PC 2.00

140.18

113.71

96.30

74.25  
72.73

62.54

45.70  
44.07  
41.71  
41.39  
38.42  
32.72  
29.92  
29.79  
24.84  
23.99

14.67

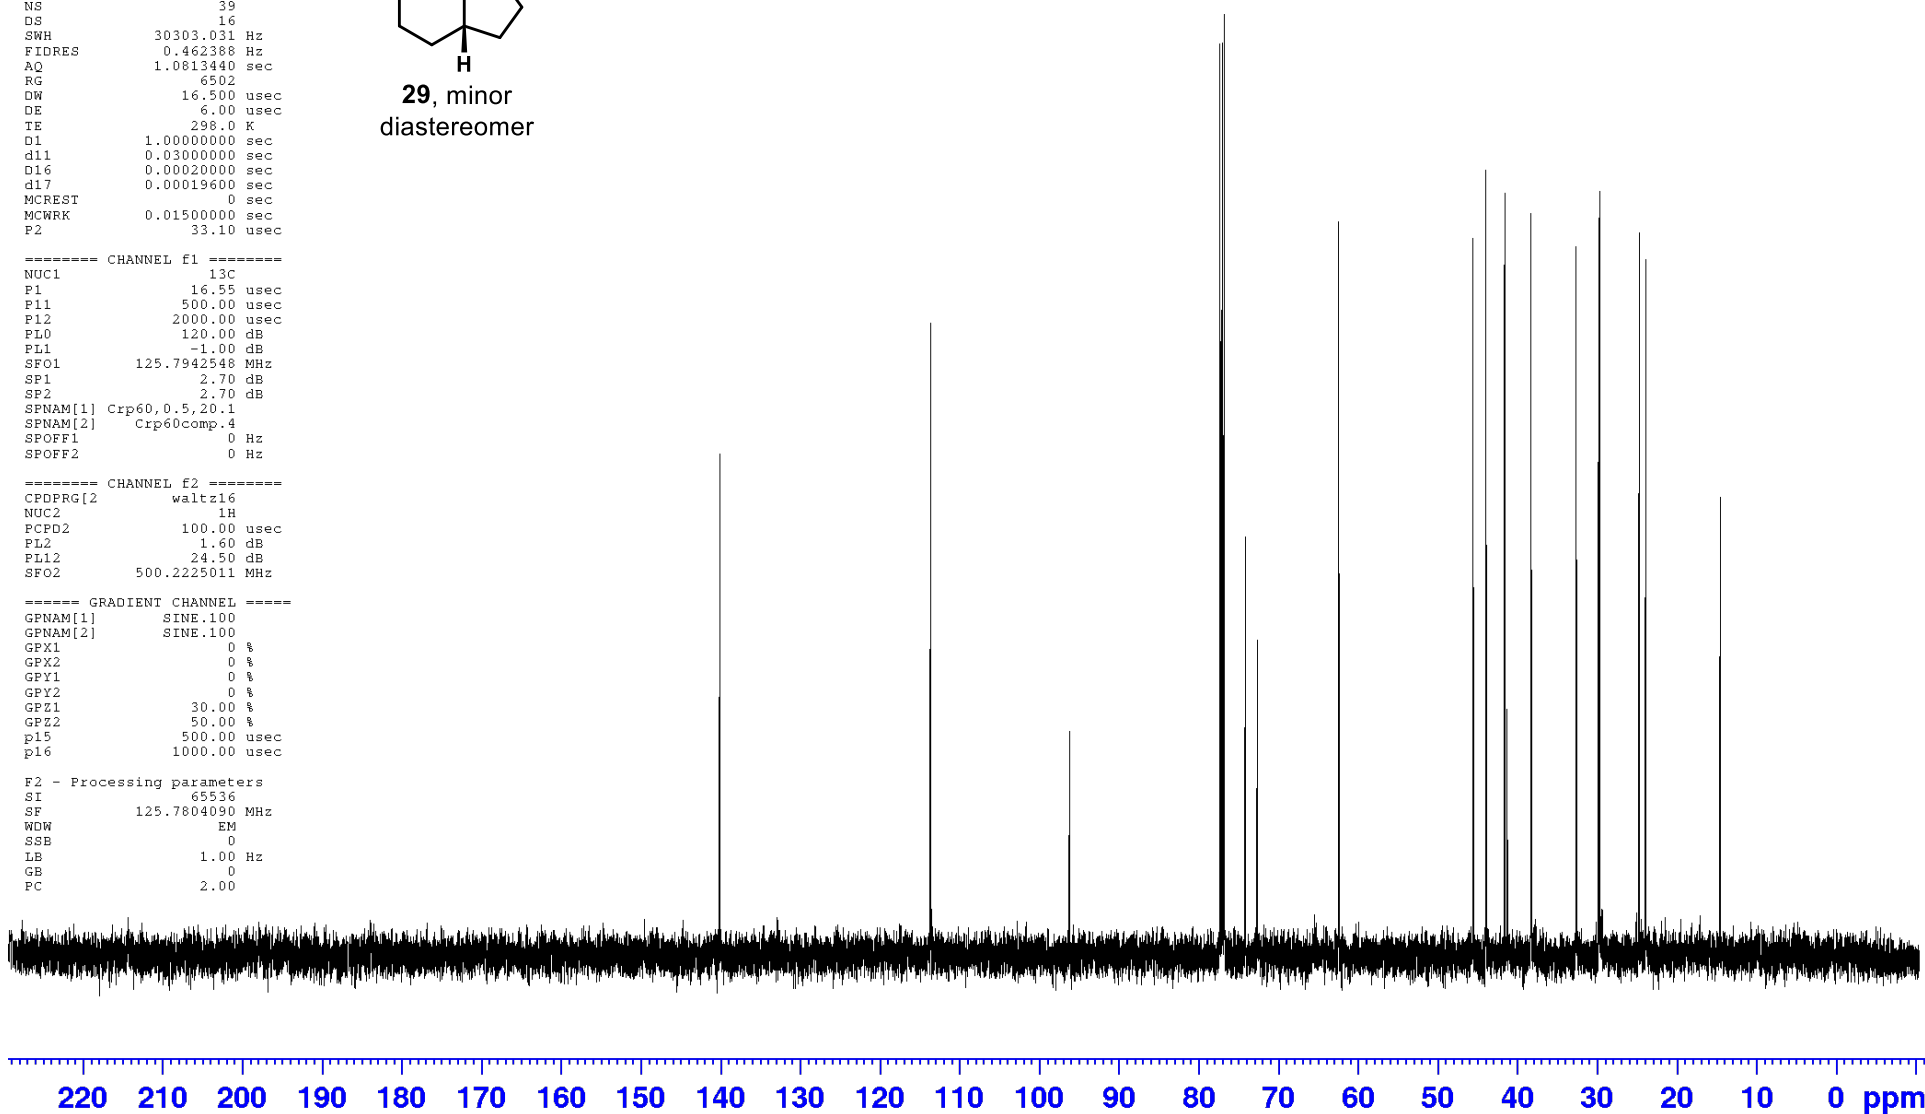

5.85  
5.82  
5.81  
5.80  
5.80  
5.78  
5.01  
5.00  
4.97  
4.97  
4.90  
4.90  
4.88  
4.16  
4.15  
4.15  
4.14  
4.13  
4.11  
4.09  
4.08  
4.06  
4.06  
4.05  
4.04  
2.77  
2.75  
2.42  
2.41  
2.17  
2.16  
2.16  
2.15  
2.14  
2.14  
2.13  
2.12  
2.06  
2.05  
2.04  
2.03  
2.01  
2.00  
2.00  
1.98  
1.97  
1.97  
1.92  
1.90  
1.90  
1.89  
1.89  
1.88  
1.82  
1.79  
1.77  
1.74  
1.74  
1.65  
1.63  
1.63  
1.62  
1.62  
1.61  
1.61  
1.60  
1.57  
1.47  
1.47  
1.46  
1.45  
1.44  
1.44  
1.44  
1.42  
1.28  
1.26  
1.25  
1.16  
1.16  
1.15  
1.15  
1.14  
1.14  
1.11  
1.11  
1.10  
0.87

Current Data Parameters  
NAME JC 2-110 top Sc (Of)  
EXPNO 1  
PROCNO 1

F2 - Acquisition Parameters  
Date\_ 20161208  
Time\_ 23.28  
INSTRUM cryo500  
PROBHD 5 mm CPTCI 1H-  
PULPROG zg30  
TD 81728  
SOLVENT CDCl3  
NS 8  
DS 2  
SWH 8012.820 Hz  
FIDRES 0.098043 Hz  
AQ 5.0998273 sec  
RG 6.3  
DW 62.400 usec  
DE 6.00 usec  
TE 298.0 K  
D1 0.10000000 sec  
MCREST 0 sec  
MCWRK 0.01500000 sec

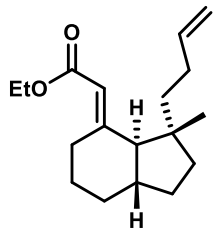

**30**, major diastereomer

==== CHANNEL f1 =====  
NUC1 1H  
P1 7.50 usec  
PL1 1.60 dB  
SFO1 500.2235015 MHz

F2 - Processing parameters  
SI 65536  
SF 500.2200317 MHz  
WDW EM  
SSB 0  
LB 0.30 Hz  
GB 0  
PC 1.00

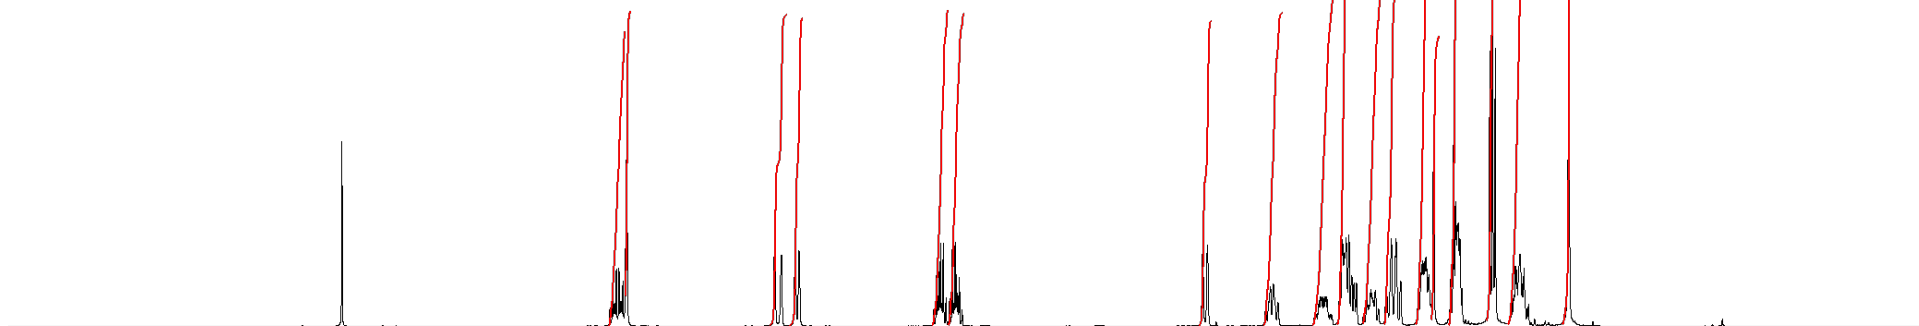

8.5 8.0 7.5 7.0 6.5 6.0 5.5 5.0 4.5 4.0 3.5 3.0 2.5 2.0 1.5 1.0 0.5 0.0 ppm

0.93  
0.99

0.98  
0.97

0.99  
0.98

0.96

0.98

1.05

2.98

1.05

2.00

1.94

0.91

2.95

3.22

2.08

3.00

```

Current Data Parameters
NAME      JC 2-110 top Sc(OTf)
EXPNO    2
PROCNO   1

F2 - Acquisition Parameters
Date_    20161208
Time     23.31
INSTRUM  cryo500
PROBHD   5 mm CPCE 1H-
PULPROG  SpinEchopg30gp.prd
TD       65536
SOLVENT  CDCl3
NS       62
DS       16
SWH      30303.031 Hz
FIDRES   0.462388 Hz
AQ       1.0813440 sec
RG       4096
DW       16.500 usec
DE       6.00 usec
TE       298.0 K
DL       1.00000000 sec
dl1      0.03000000 sec
dl6      0.00020000 sec
dl7      0.00019600 sec
MCREST   0 sec
MCWRK    0.01500000 sec
F2       33.10 usec

```

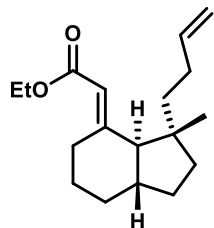

**30, major diastereomer**

```

===== CHANNEL f1 =====
NUC1    13C
P1      16.55 usec
PL1     500.00 usec
PL2     2000.00 usec
PL0     120.00 dB
PL1     -1.00 dB
SFO1    125.7942548 MHz
SFO2    2.70 dB
SFO3    2.70 dB
SPNAM[1] Crp60, 0.5, 20.1
SPNAM[2] Crp60comp.4
SPOFF1  0 Hz
SPOFF2  0 Hz

```

```

===== CHANNEL f2 =====
CPDPRG[2] waltz16
NUC2     1H
PCPD2    100.00 usec
PL2      1.60 dB
PL12     24.50 dB
SFO2    500.2225011 MHz

```

```

===== GRADIENT CHANNEL =====
GPNAM[1] SINE.100
GPNAM[2] SINE.100
GPX1     0 %
GPX2     0 %
GPY1     0 %
GPY2     0 %
GZ1      30.00 %
GZ2      50.00 %
p15      500.00 usec
p16      1000.00 usec

```

```

F2 - Processing parameters
SI       65536
SF       125.7804081 MHz
WQM      EM
SSB      0
LB       1.00 Hz
GB       0
PC       2.00

```

167.55  
160.72  
140.08  
116.56  
113.70  
59.79  
56.03  
45.61  
42.50  
40.45  
37.98  
34.86  
29.87  
28.30  
24.84  
24.13  
22.98  
14.41

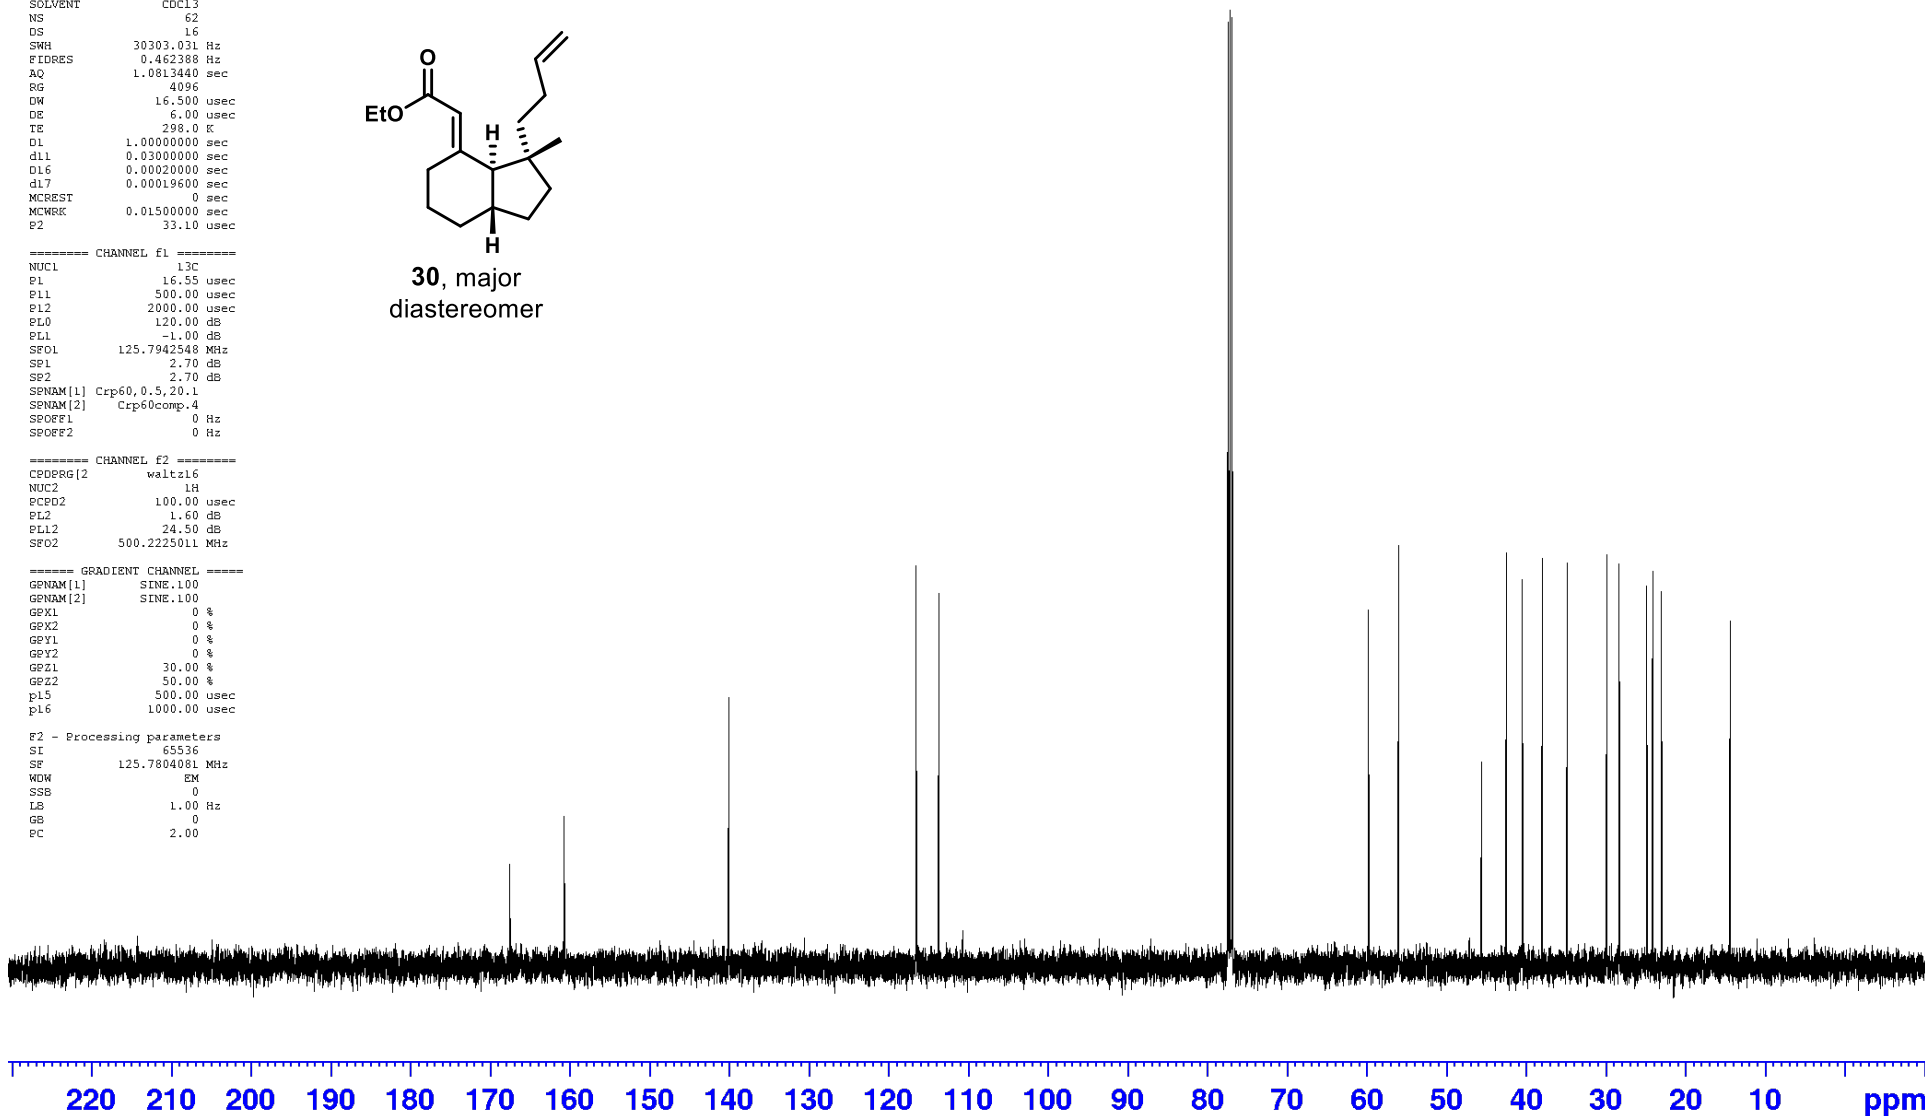

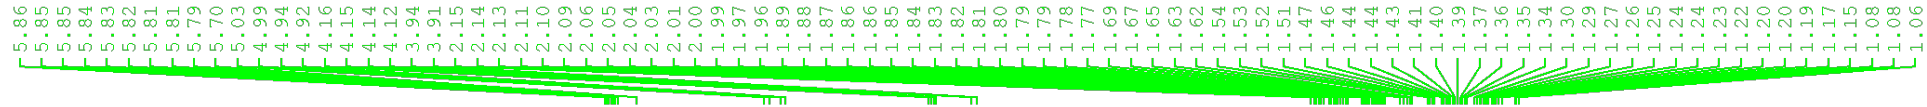

Current Data Parameters  
 NAME JC 2-110 bot Sc(Off)  
 EXPNO 1  
 PROCNO 1

F2 - Acquisition Parameters  
 Date\_ 20161208  
 Time 23.15  
 INSTRUM cryo500  
 PROBHD 5 mm CPTCI 1H-  
 PULPROG zg30  
 TD 81728  
 SOLVENT CDCl3  
 NS 8  
 DS 2  
 SWH 8012.820 Hz  
 FIDRES 0.098043 Hz  
 AQ 5.0998273 sec  
 RG 6.3  
 DW 62.400 usec  
 DE 6.00 usec  
 TE 298.0 K  
 D1 0.10000000 sec  
 MCREST 0 sec  
 MCWRK 0.01500000 sec

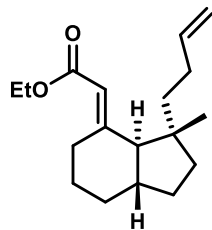

**30, minor diastereomer**

===== CHANNEL f1 =====  
 NUC1 1H  
 P1 7.50 usec  
 PL1 1.60 dB  
 SFO1 500.2235015 MHz

F2 - Processing parameters  
 SI 65536  
 SF 500.2200322 MHz  
 WDW EM  
 SSB 0  
 LB 0.30 Hz  
 GB 0  
 PC 1.00

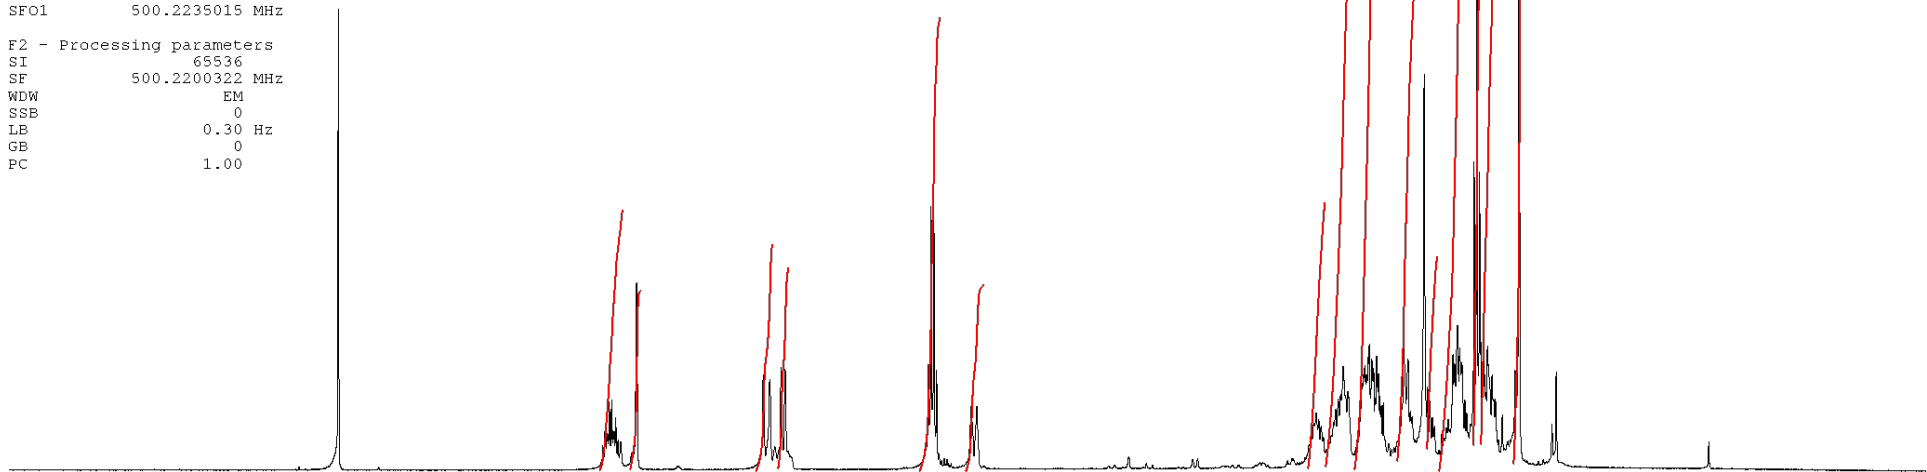

8.5 8.0 7.5 7.0 6.5 6.0 5.5 5.0 4.5 4.0 3.5 3.0 2.5 2.0 1.5 1.0 0.5 0.0 ppm

1.15 0.80 1.01 0.90 2.00 0.82 1.19 2.71 4.21 2.15 0.96 3.52 2.69 3.03 2.61

Current Data Parameters  
NAME JC 2-110 bot Sc(OTf)  
EXPNO 2  
PROCNO 1

F2 - Acquisition Parameters  
Date\_ 20161208  
Time 23.19  
INSTRUM cryo500  
PROBHD 5 mm CPTCI 1H-  
PULPROG SpinEcho30pp-prd  
TD 65536  
SOLVENT CDCl3  
NS 60  
DS 16  
SWH 30303.031 Hz  
FIDRES 0.462388 Hz  
AQ 1.0813440 sec  
RG 8192  
DW 16.500 usec  
DE 6.00 usec  
TE 298.0 K  
DL 1.0000000 sec  
dL1 0.0300000 sec  
DL6 0.0002000 sec  
dL7 0.000196000 sec  
MCREST 0 sec  
MCWRK 0.01500000 sec  
F2 33.10 usec

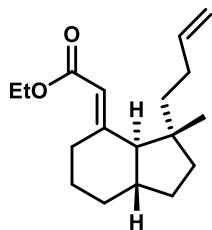

30, minor  
diastereomer

===== CHANNEL f1 =====  
NUC1 13C  
P1 16.55 usec  
P11 500.00 usec  
P12 2000.00 usec  
PL0 120.00 dB  
PL1 -1.00 dB  
SFO1 125.7942549 MHz  
SP1 2.70 dB  
SP2 2.70 dB  
SPNAM[1] Crp60, 0.5, 20.1  
SPNAM[2] Crp60comp.4  
SPOFF1 0 Hz  
SPOFF2 0 Hz

===== CHANNEL f2 =====  
CPDPRG[2] waltz16  
NUC2 1H  
PCPD2 100.00 usec  
PL2 1.60 dB  
PLL2 24.50 dB  
SFO2 500.225011 MHz

===== GRADIENT CHANNEL =====  
GPNAM[1] SINE.100  
GPNAM[2] SINE.100  
GPX1 0 %  
GPX2 0 %  
GPY1 0 %  
GPY2 0 %  
GPZ1 30.00 %  
GPZ2 50.00 %  
p15 500.00 usec  
p16 1000.00 usec

F2 - Processing parameters  
SI 65536  
SF 125.7804079 MHz  
WDW EM  
SSB 0  
LB 1.00 Hz  
GB 0  
PC 2.00

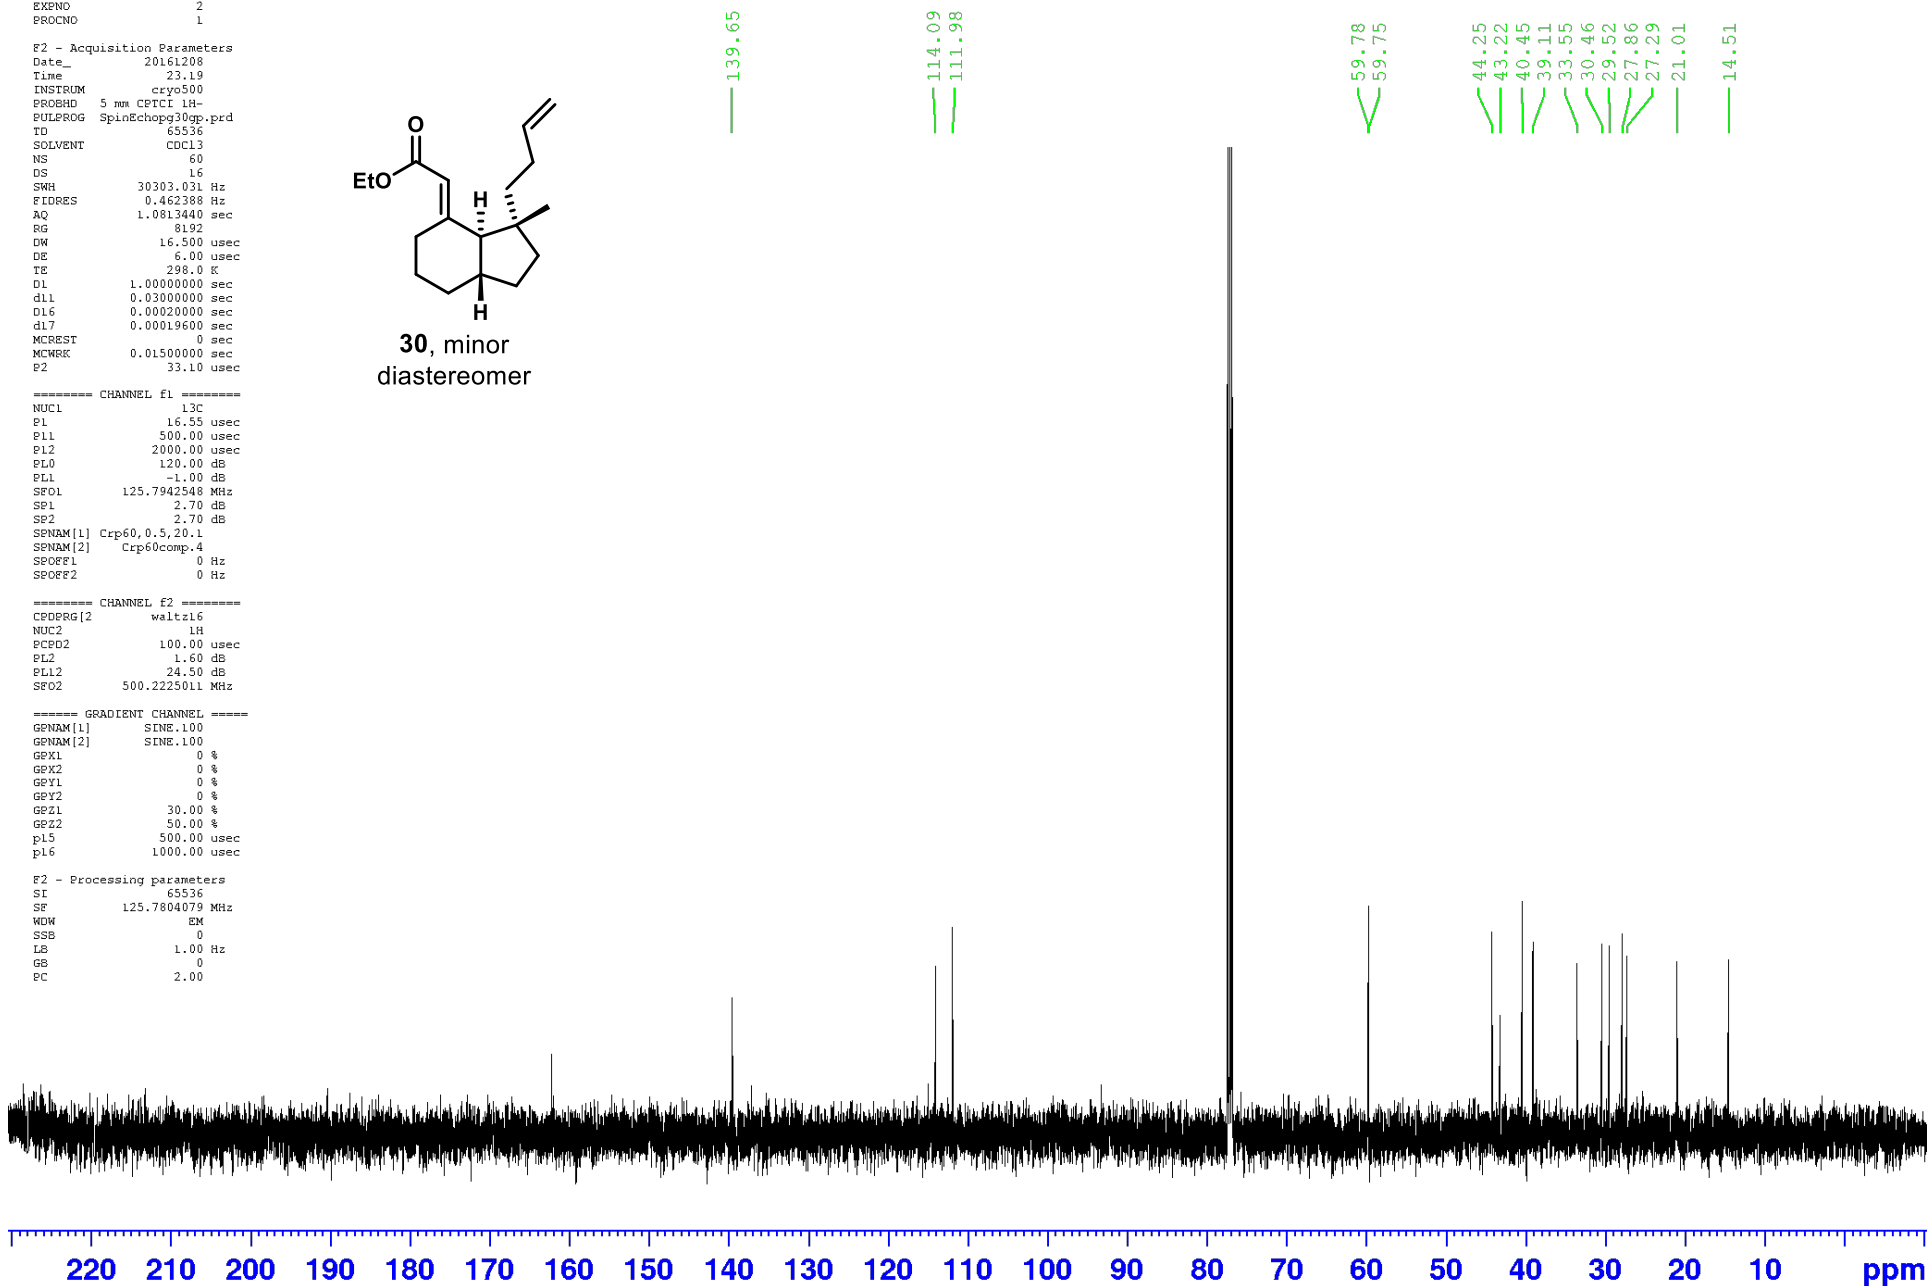



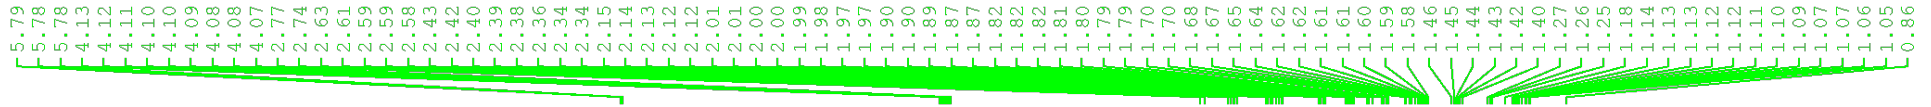

Current Data Parameters  
 NAME JC 2-115 Wacker top  
 EXPNO 1  
 PROCNO 1

F2 - Acquisition Parameters  
 Date\_ 20161210  
 Time 17.41  
 INSTRUM cryo500  
 PROBHD 5 mm CPTCI 1H-  
 PULPROG zg30  
 TD 81728  
 SOLVENT CDCl3  
 NS 8  
 DS 2  
 SWH 8012.820 Hz  
 FIDRES 0.098043 Hz  
 AQ 5.0998273 sec  
 RG 7.1  
 DW 62.400 usec  
 DE 6.00 usec  
 TE 298.0 K  
 D1 0.10000000 sec  
 MCREST 0 sec  
 MCWRK 0.01500000 sec

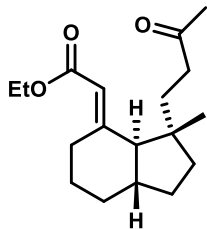

**31, major diastereomer**

==== CHANNEL f1 =====  
 NUC1 1H  
 P1 7.50 usec  
 PL1 1.60 dB  
 SFO1 500.2235015 MHz

F2 - Processing parameters  
 SI 65536  
 SF 500.2200313 MHz  
 WDW EM  
 SSB 0  
 LB 0.30 Hz  
 GB 0  
 PC 1.00

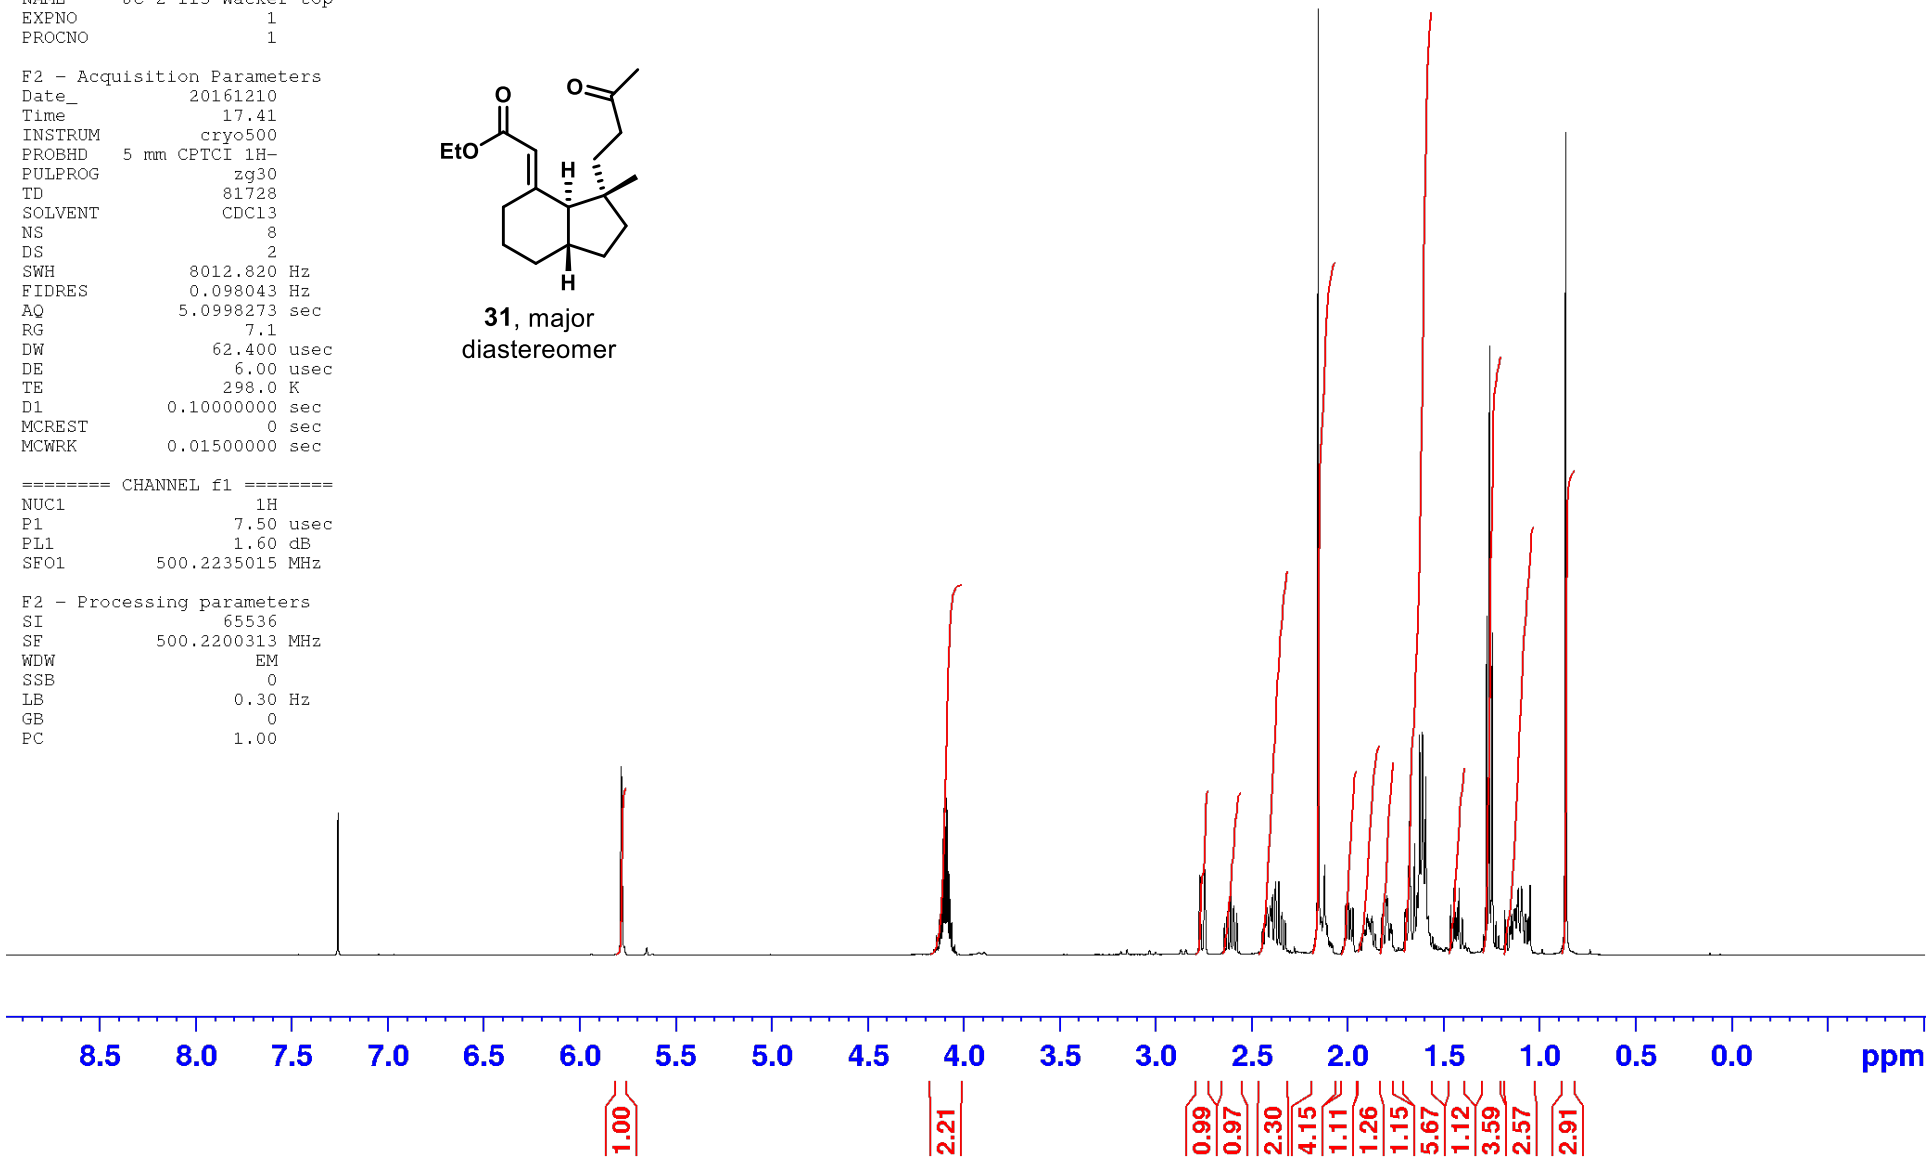

210.14

167.46  
160.80

59.88  
54.63  
44.79  
40.66  
40.05  
37.85  
36.27  
34.78  
30.01  
28.76  
24.65  
24.24  
23.90  
14.34

```
CURRENT DATA PARAMETERS
NAME      JE 2.115 wackec Log
EXPNO    2
PROCNO   1

F2 - ACQUISITION PARAMETERS
DATE_    20161210
TIME     11.44
INSTRUM  Ccp6000
PROBHD   5 mm CPIC1 1H-
PULPROG  zgpg30
SFO1     125.7604991 MHz
ID       65526
SOLVENT  CDCl3
NS       38
DS       16
SWH      30000.021 MHz
FIDRES   0.162388 MHz
AQ       1.0813460 SEC
RG       5160.6
DM       16.500 USEC
DE       6.00 USEC
TE       298.0 K
D1       1.0000000 SEC
D11      0.0200000 SEC
D16      0.0002000 SEC
D17      0.00019600 SEC
MCRES1   0 SEC
MCWRK    0.0150000 SEC
P2       33.10 USEC

----- CHANNEL f1 -----
NUC1     13C
P1       16.55 USEC
P11      500.00 USEC
P12      2000.00 USEC
PL0      120.00 DB
PL1      -1.00 DB
SFO1     125.7604991 MHz
SP1      2.10 DB
SP2      2.10 DB
SFO1M11  Ccp60.0.5.20.1
SFO1M12  Ccp60comp.1
SFOFF1   0 MHz
SFOFF2   0 MHz

----- CHANNEL f2 -----
CPDPRG12 waltz16
NUC2     1H
PCPD2   100.00 USEC
PL2     1.60 DB
PL12    24.50 DB
SFO2    500.225011 MHz

----- GRADIENT CHANNEL -----
GPM1M11  SINE.100
GPM1M12  SINE.100
GPI1     0 %
GPI2     0 %
GPI3     0 %
GPI4     0 %
GPI5     30.00 %
GPI6     50.00 %
GPI7     500.00 USEC
GPI8     1000.00 USEC

F2 - PROCESSING PARAMETERS
SI       65526
SF       125.7604991 MHz
WDW      EM
SSB      0
LB       1.00 MHz
GB       0
PC       2.00
```

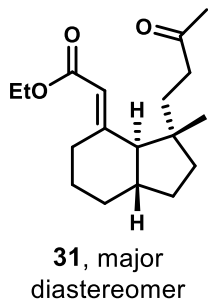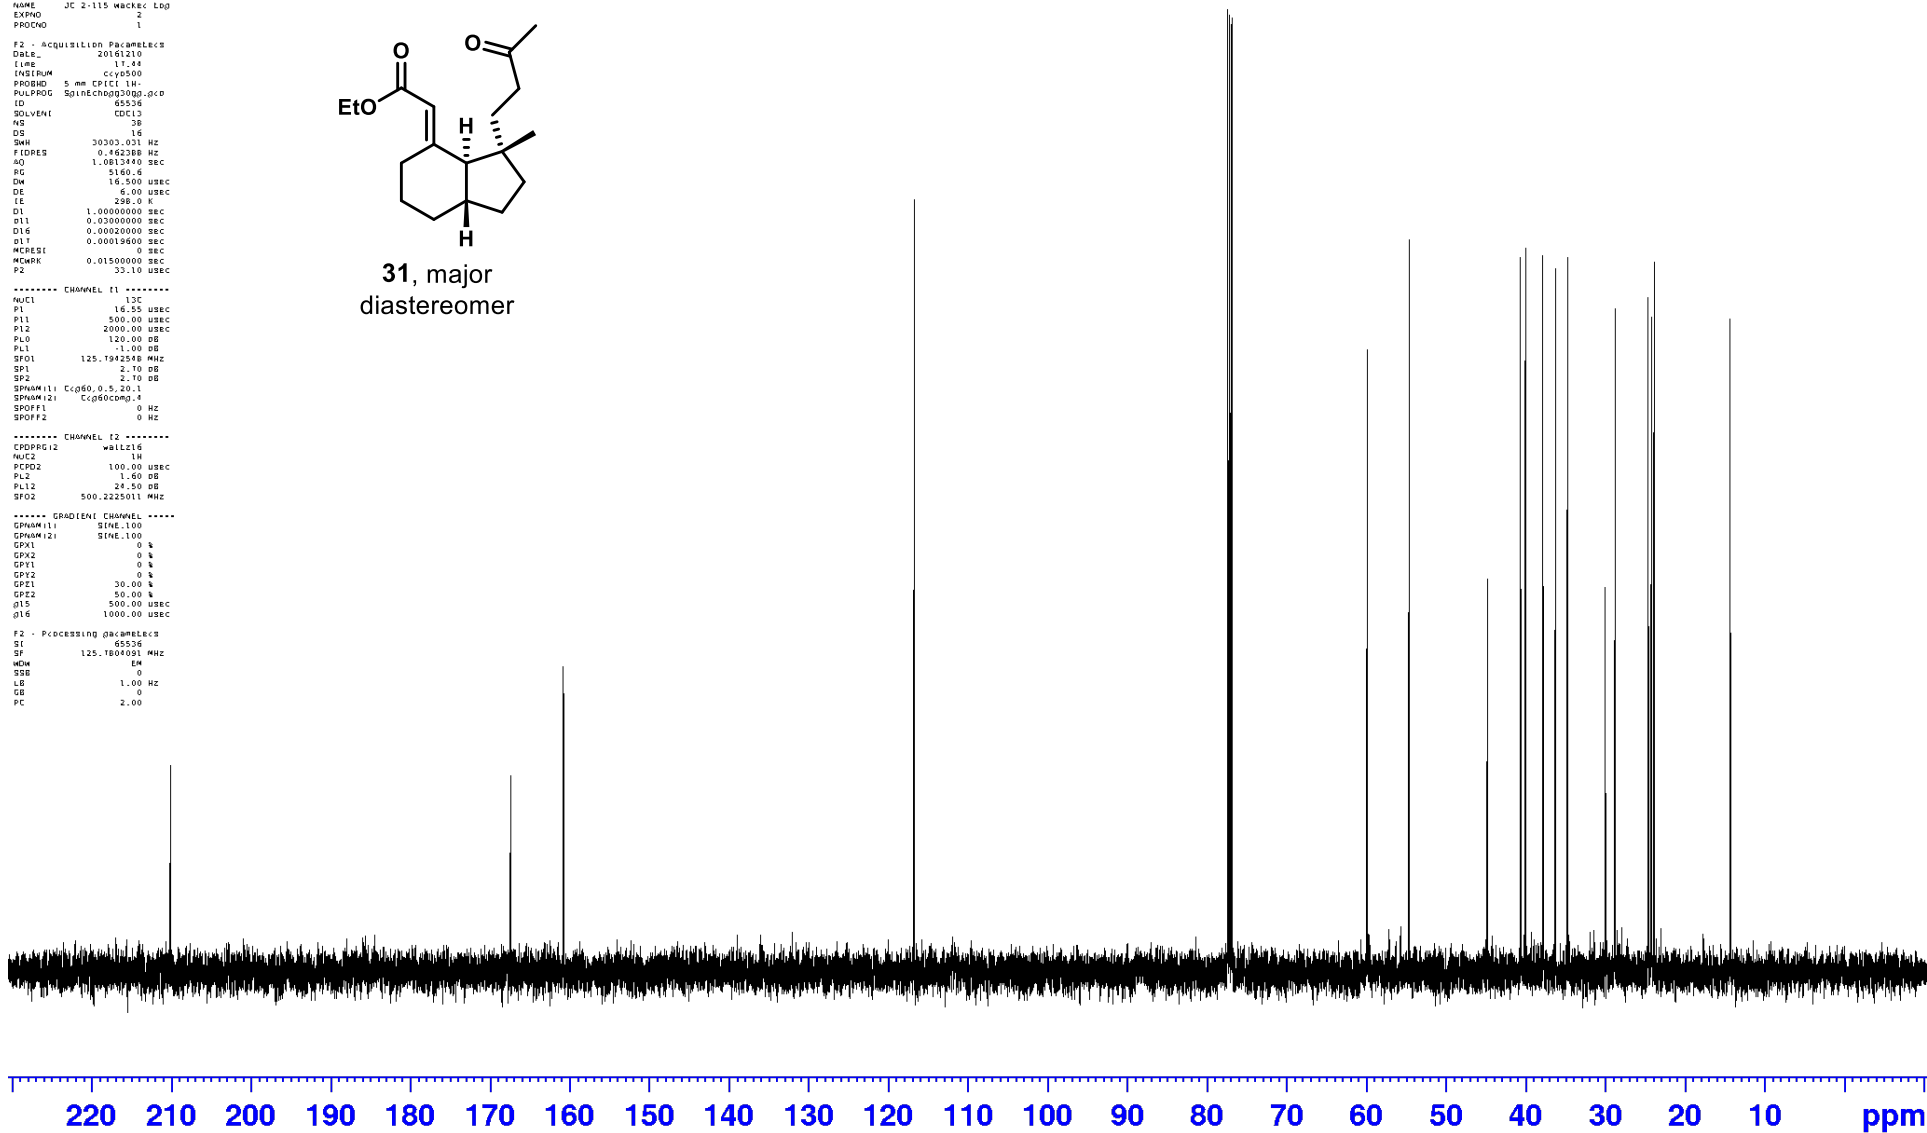

5.67  
4.15  
4.14  
4.14  
4.12  
4.12  
4.11  
3.94  
3.92  
2.53  
2.50  
2.49  
2.48  
2.47  
2.42  
2.41  
2.39  
2.38  
2.36  
2.35  
2.16  
2.03  
2.02  
2.01  
2.01  
2.00  
2.00  
1.98  
1.97  
1.96  
1.96  
1.90  
1.89  
1.88  
1.88  
1.87  
1.86  
1.85  
1.84  
1.84  
1.83  
1.82  
1.82  
1.81  
1.80  
1.68  
1.67  
1.65  
1.64  
1.63  
1.62  
1.59  
1.57  
1.57  
1.56  
1.56  
1.55  
1.54  
1.47  
1.46  
1.44  
1.43  
1.43  
1.41  
1.40  
1.40  
1.39  
1.38  
1.37  
1.36  
1.35  
1.35  
1.34  
1.29  
1.27  
1.27  
1.26  
1.25  
1.24  
1.24  
1.23  
1.23  
1.21  
1.20  
1.20  
1.05

Current Data Parameters  
NAME JC 2-115 Wacker bot  
EXPNO 1  
PROCNO 1

F2 - Acquisition Parameters  
Date\_ 20161210  
Time 17.32  
INSTRUM cryo500  
PROBHD 5 mm CPTCI 1H-  
PULPROG zg30  
TD 81728  
SOLVENT CDCl3  
NS 2  
DS 2  
SWH 8012.820 Hz  
FIDRES 0.098043 Hz  
AQ 5.0998273 sec  
RG 6.3  
DW 62.400 usec  
DE 6.00 usec  
TE 298.0 K  
D1 0.10000000 sec  
MCREST 0 sec  
MCWRK 0.01500000 sec

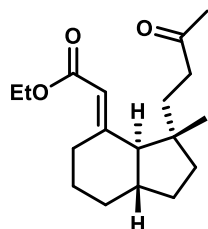

31, minor diastereomer

===== CHANNEL f1 =====  
NUC1 1H  
P1 7.50 usec  
PL1 1.60 dB  
SFO1 500.2235015 MHz

F2 - Processing parameters  
SI 65536  
SF 500.2200318 MHz  
WDW EM  
SSB 0  
LB 0.30 Hz  
GB 0  
PC 1.00

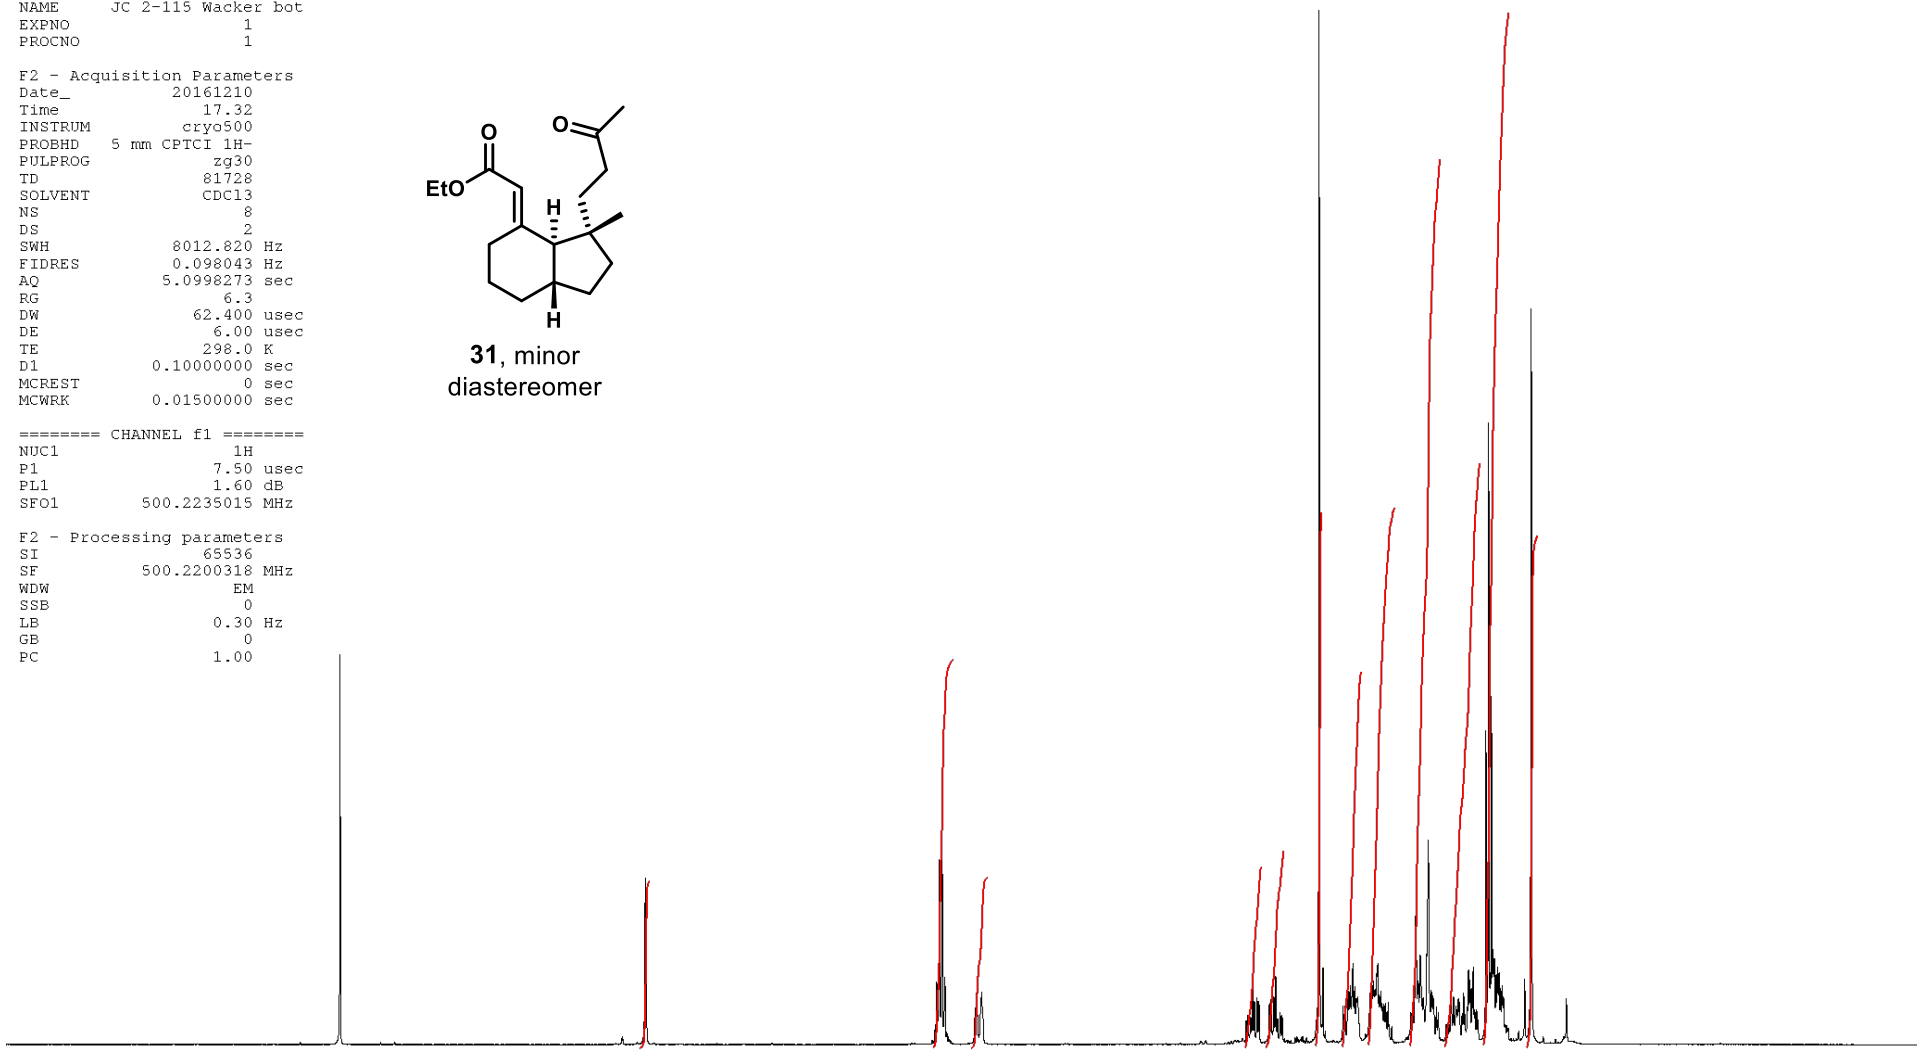

8.5 8.0 7.5 7.0 6.5 6.0 5.5 5.0 4.5 4.0 3.5 3.0 2.5 2.0 1.5 1.0 0.5 0.0 ppm

1.00

2.33

1.02

1.09

1.19

3.24

2.27

3.24

5.33

3.51

6.22

3.07

S107

```

Current Data Parameters
NAME      JC 2-115 Wacker bot
EXPNO     2
PROCNO    1

F2 - Acquisition Parameters
Date_     20161210
Time      17.34
INSTRUM   crys500
PROBHD    5 mm CPTCI 1H-
PULPROG   SpinEcho30pp.prd
TD         65536
SOLVENT   CDCl3
NS         76
DS         16
SWH        30303.031 Hz
FIDRES     0.462388 Hz
AQ         1.0813440 sec
RG         4597.6
DW         16.500 usec
DE         6.00 usec
TE         298.0 K
D1         1.00000000 sec
d11        0.33000000 sec
D16        0.00020000 sec
d17        0.00019600 sec
MCREST    0 sec
MCHRR     0.01500000 sec
P2         33.10 usec

----- CHANNEL F1 -----
NUC1       13C
P1         16.55 usec
P11        500.00 usec
P12        2000.00 usec
P10        120.00 dB
P11        -1.00 dB
SFO1       125.7942548 MHz
SP1        2.70 dB
SP2        2.70 dB
SPNAM[1]   Crp60,0.5,20.1
SPNAM[2]   Crp60comp.4
SPOFF1     0 Hz
SPOFF2     0 Hz

----- CHANNEL F2 -----
CPDPRG[2]  waltz16
NUC2       1H
PCPD2      100.00 usec
PL2        1.60 dB
PL12       24.50 dB
SFO2       500.2225011 MHz

----- GRADIENT CHANNEL -----
GPNAM[1]   SINE.100
GPNAM[2]   SINE.100
GPX1       0 %
GPX2       0 %
GPY1       0 %
GPY2       0 %
GPD1       30.00 %
GPZ2       50.00 %
p15        500.00 usec
p16        1000.00 usec

F2 - Processing parameters
SI         65536
SF         125.7804084 MHz
WDW        EM
SSB        0
LB         1.00 Hz
GB         0
PC         2.00

```

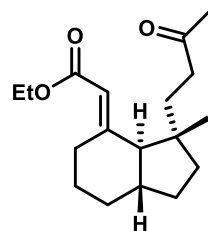

31, minor diastereomer

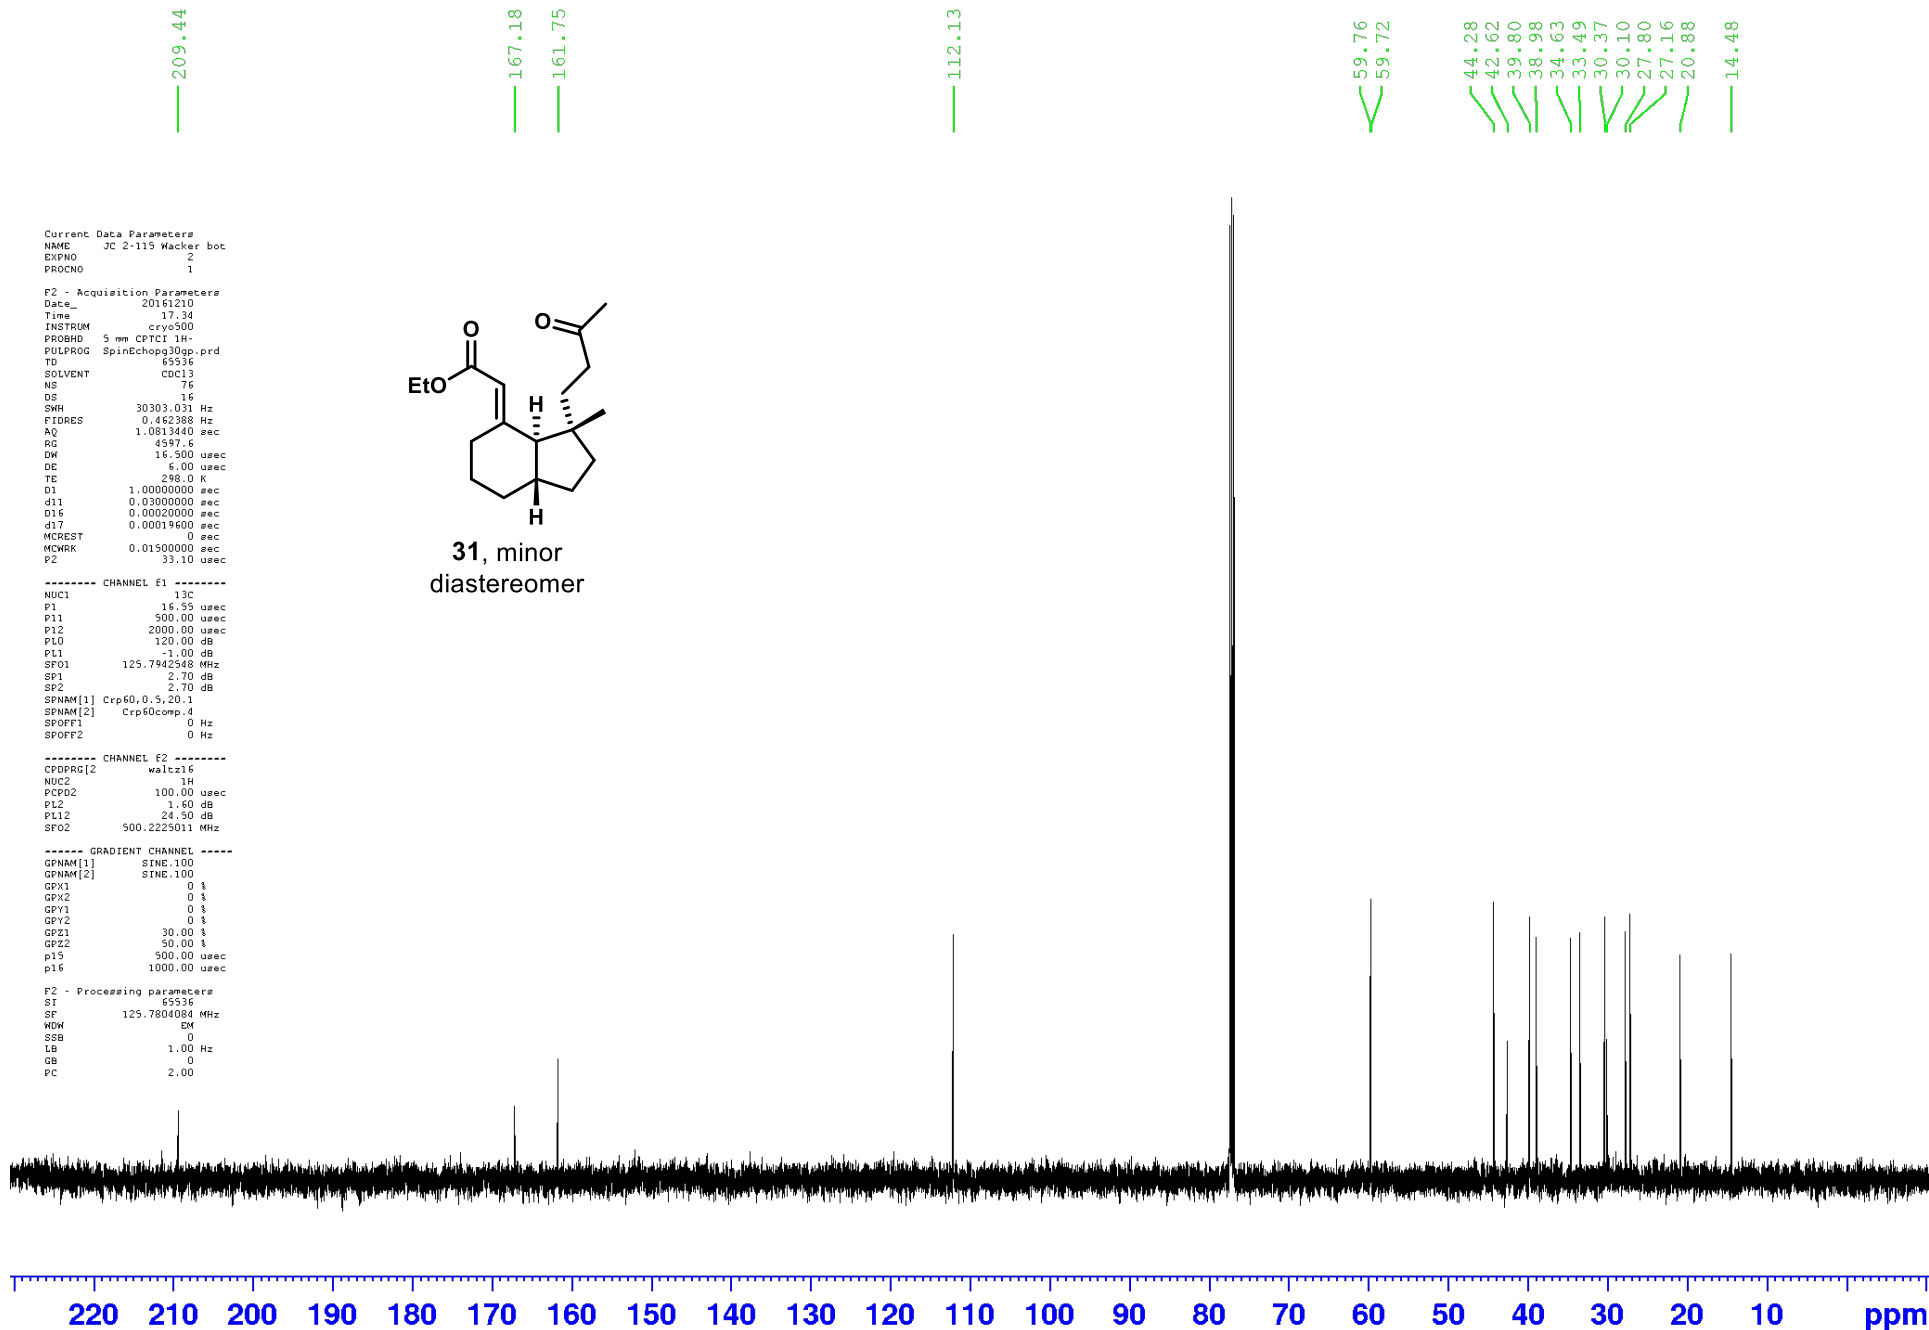

4.11  
4.10  
4.10  
4.09  
4.08  
4.07  
4.06  
4.06  
2.55  
2.52  
2.35  
2.32  
2.07  
2.05  
2.04  
1.96  
1.96  
1.95  
1.93  
1.92  
1.92  
1.91  
1.91  
1.89  
1.88  
1.88  
1.87  
1.86  
1.85  
1.83  
1.77  
1.74  
1.72  
1.71  
1.70  
1.69  
1.68  
1.66  
1.66  
1.65  
1.63  
1.63  
1.57  
1.56  
1.54  
1.53  
1.52  
1.52  
1.51  
1.51  
1.50  
1.48  
1.47  
1.47  
1.45  
1.45  
1.44  
1.42  
1.42  
1.41  
1.39  
1.38  
1.37  
1.36  
1.34  
1.34  
1.32  
1.30  
1.28  
1.27  
1.25  
1.24  
1.22  
1.22  
1.20  
1.02  
1.01  
0.99  
0.98  
0.97  
0.96  
0.95  
0.94  
0.92  
0.84

Current Data Parameters

NAME JC 2-133 SmI2 140 mg  
EXPNO 1  
PROCNO 1

F2 - Acquisition Parameters

Date\_ 20161219  
Time 23.08  
INSTRUM cryo500  
PROBHD 5 mm CPTCI 1H-  
PULPROG zg30  
TD 81728  
SOLVENT CDCl3  
NS 8  
DS 2  
SWH 8012.820 Hz  
FIDRES 0.098043 Hz  
AQ 5.0998273 sec  
RG 6.3  
DW 62.400 usec  
DE 6.00 usec  
TE 298.0 K  
D1 0.10000000 sec  
MCREST 0 sec  
MCWRK 0.01500000 sec

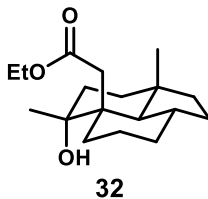

==== CHANNEL f1 =====

NUC1 1H  
P1 7.50 usec  
PL1 1.60 dB  
SFO1 500.2235015 MHz

F2 - Processing parameters

SI 65536  
SF 500.2200318 MHz  
WDW EM  
SSB 0  
LB 0.30 Hz  
GB 0  
PC 1.00

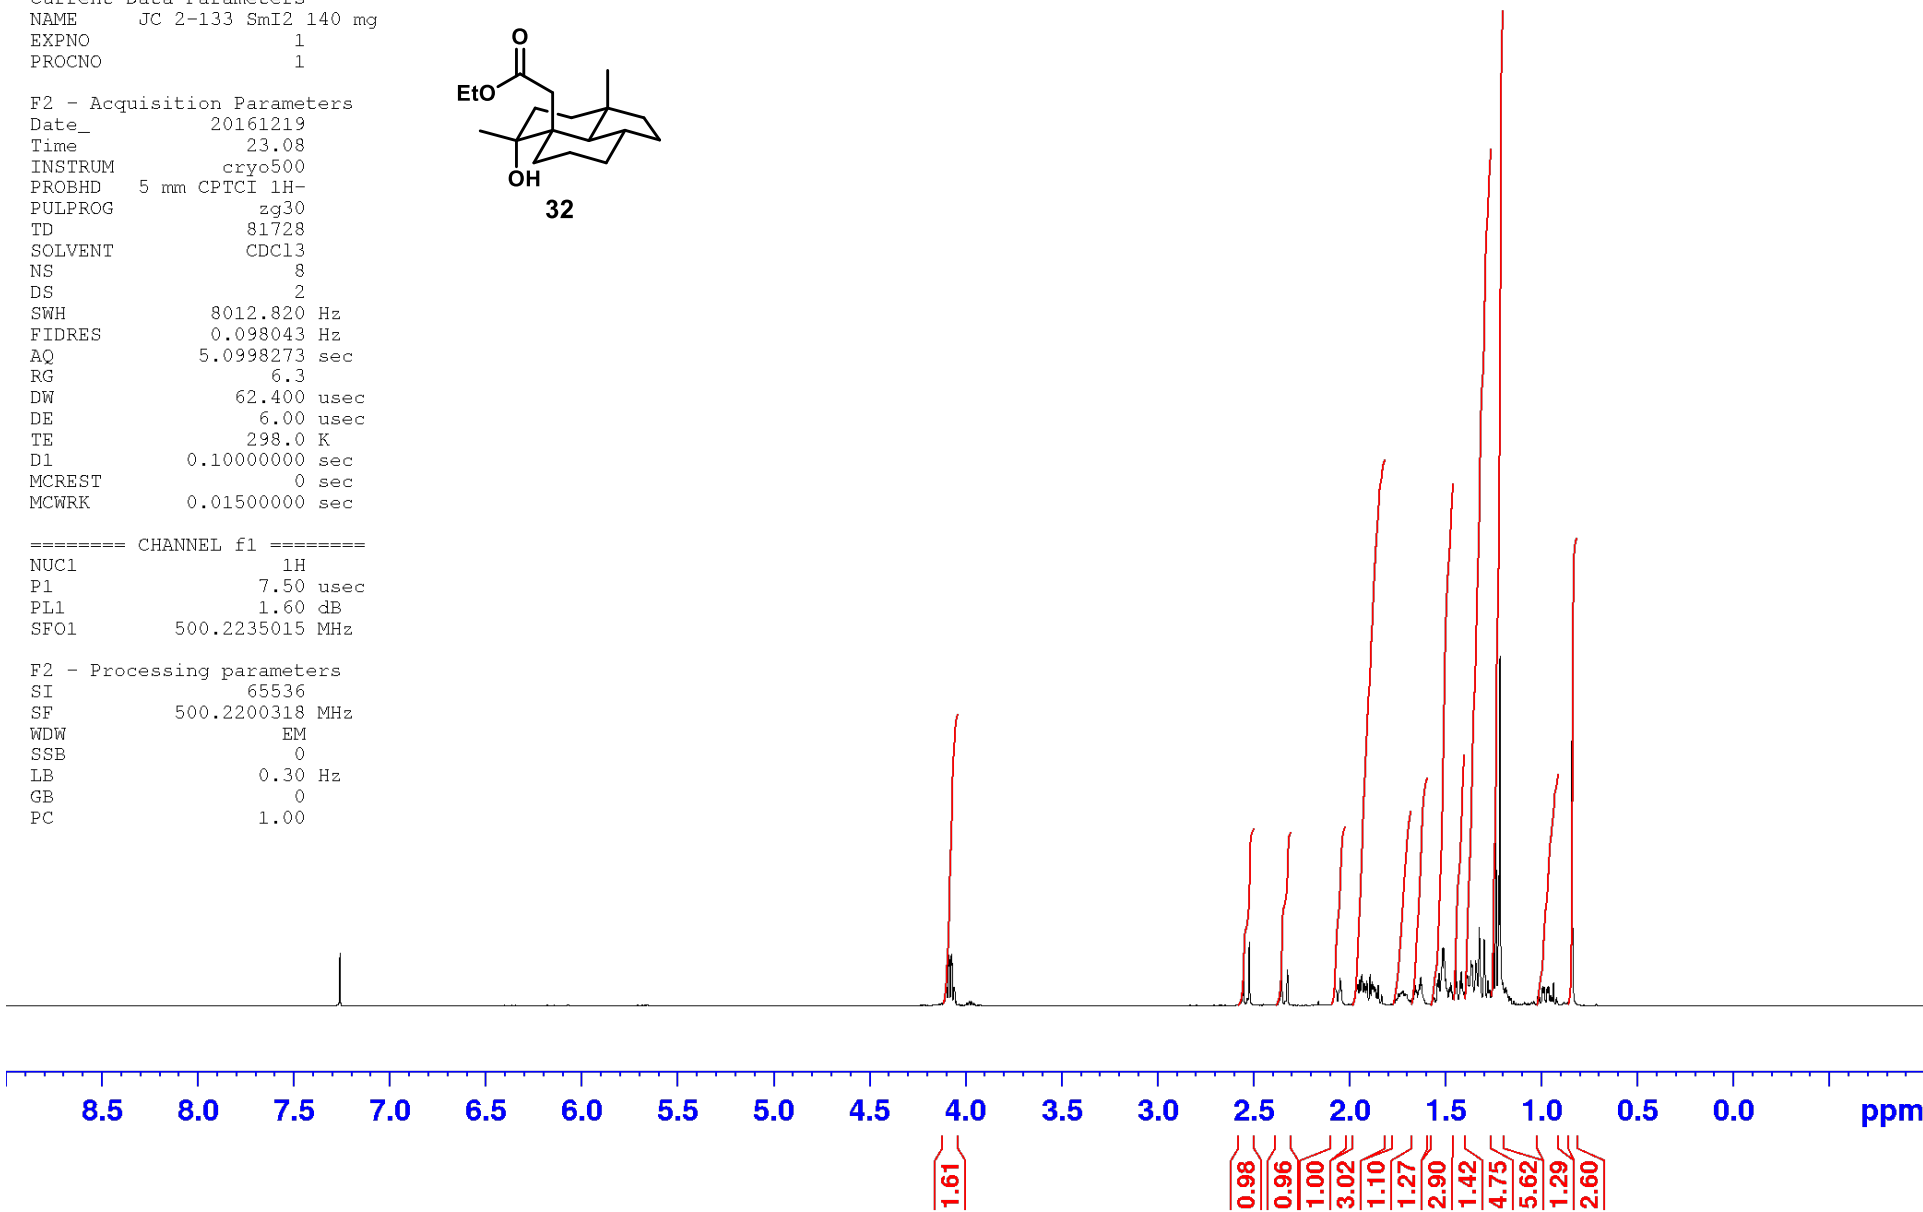

Current Data Parameters  
NAME JC 2-133 SmI2 140 mg  
EXPNO 2  
PROCNO 1

F2 - Acquisition Parameters  
Date\_ 20161219  
Time 23:10  
INSTRUM cryo500  
PROBHD 5 mm CPTCI 1H-  
PULPROG SpinEchopq30gp.prd  
TD 65536  
SOLVENT CDC13  
NS 51  
DS 16  
SWH 30303.031 Hz  
FIDRES 0.462388 Hz  
AQ 1.0813440 sec  
RG 7298.2  
DW 16.500 usec  
DE 6.00 usec  
TE 298.0 K  
D1 0.25000000 sec  
d11 0.03000000 sec  
D16 0.00020000 sec  
d17 0.00019600 sec  
MCKEST 0 sec  
MCWRK 0.01500000 sec  
P2 33.10 usec

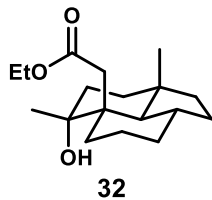

172.91

74.21

60.14

54.69

45.05

41.62

39.85

35.29

35.10

34.32

34.06

34.05

28.07

27.47

25.73

23.19

20.88

14.28

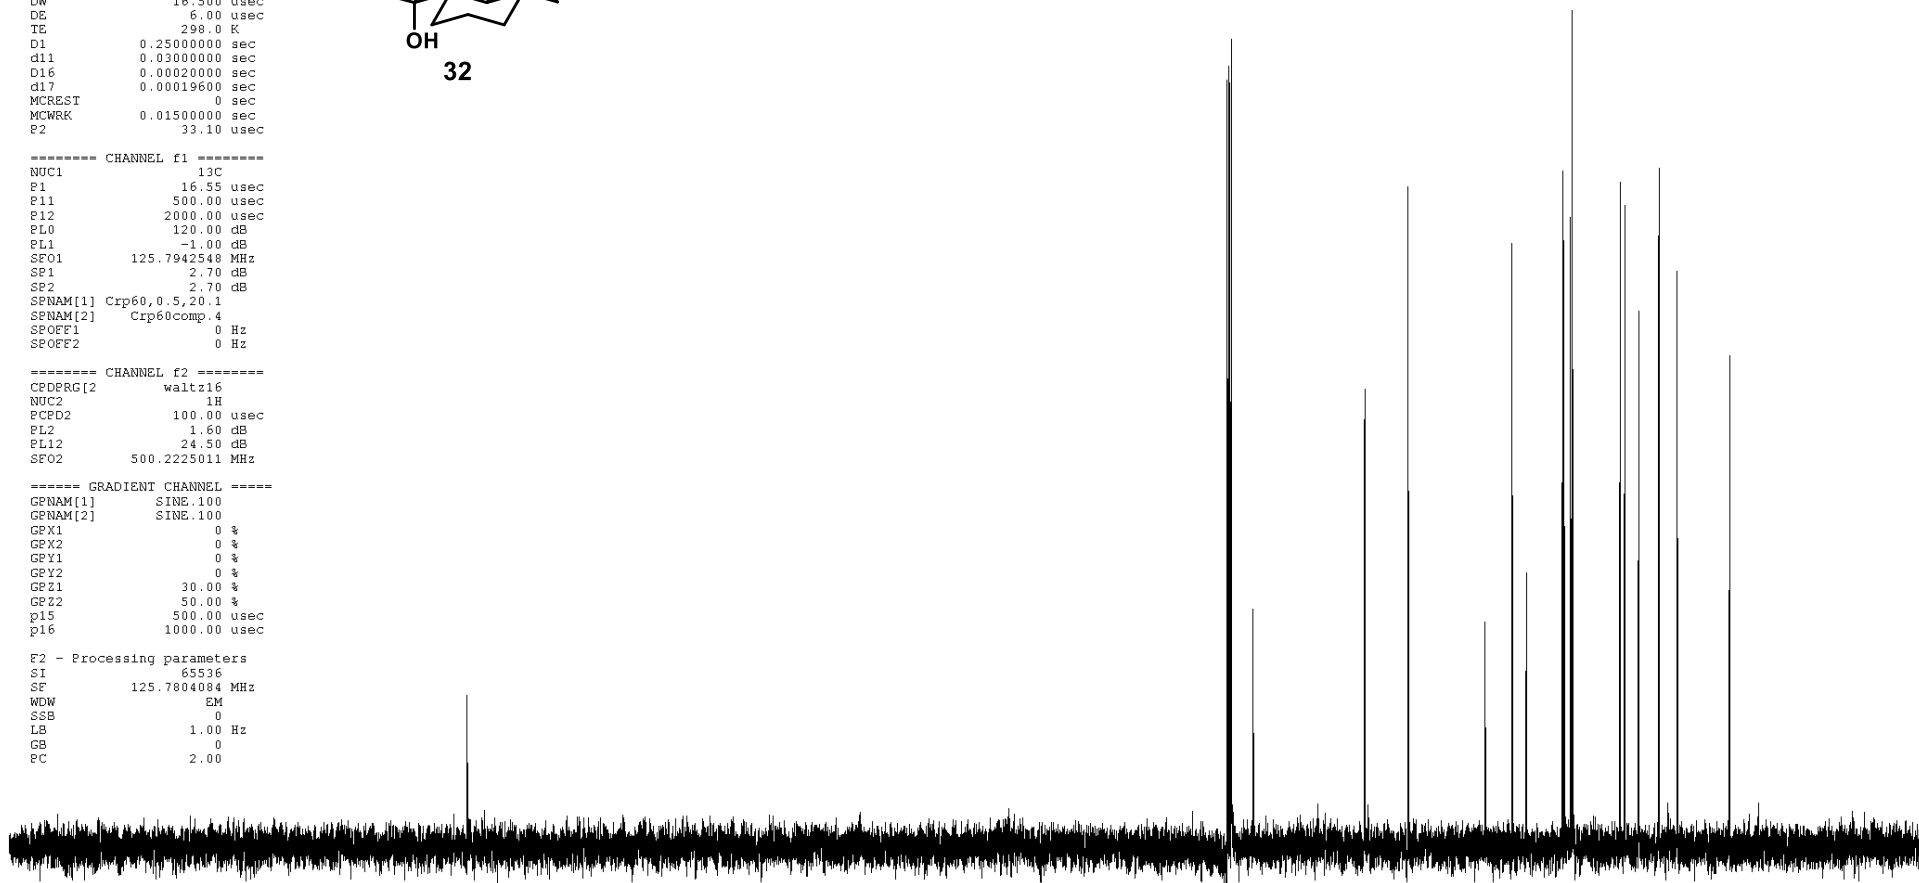

220 210 200 190 180 170 160 150 140 130 120 110 100 90 80 70 60 50 40 30 20 10 ppm

5.27  
5.27  
5.27  
5.26  
5.26  
4.15  
4.14  
4.13  
4.12  
4.10  
4.09  
4.07  
4.07  
4.05  
2.72  
2.69  
2.69  
2.45  
2.44  
2.42  
2.42  
2.27  
2.26  
2.24  
2.24  
2.07  
2.07  
2.06  
2.06  
2.05  
2.04  
2.02  
2.01  
2.01  
1.97  
1.93  
1.92  
1.91  
1.89  
1.89  
1.82  
1.69  
1.69  
1.68  
1.68  
1.67  
1.67  
1.66  
1.65  
1.65  
1.64  
1.64  
1.56  
1.55  
1.54  
1.53  
1.53  
1.51  
1.39  
1.37  
1.27  
1.25  
1.24  
1.23  
1.23  
1.21  
1.21  
1.20  
1.19  
1.18  
1.02  
1.00  
0.99  
0.98  
0.97  
0.96  
0.95  
0.93  
0.89

Current Data Parameters  
NAME JC 2-137 SOC12 top  
EXPNO 1  
PROCNO 1

F2 - Acquisition Parameters  
Date\_ 20161220  
Time 5.27  
INSTRUM gn500  
PROBHD 5 mm broadband  
PULPROG zg30  
TD 81728  
SOLVENT CDC13  
NS 8  
DS 2  
SWH 8012.820 Hz  
FIDRES 0.098043 Hz  
AQ 5.0998273 sec  
RG 181  
DW 62.400 usec  
DE 6.00 usec  
TE 298.1 K  
D1 0.10000000 sec  
MCREST 0 sec  
MCWRK 0.01500000 sec

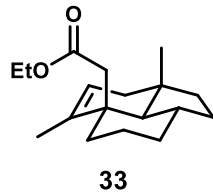

==== CHANNEL f1 =====  
NUC1 1H  
P1 12.00 usec  
PL1 -5.80 dB  
SF01 499.0734935 MHz

F2 - Processing parameters  
SI 65536  
SF 499.0700315 MHz  
WDW EM  
SSB 0  
LB 0.30 Hz  
GB 0  
PC 1.00

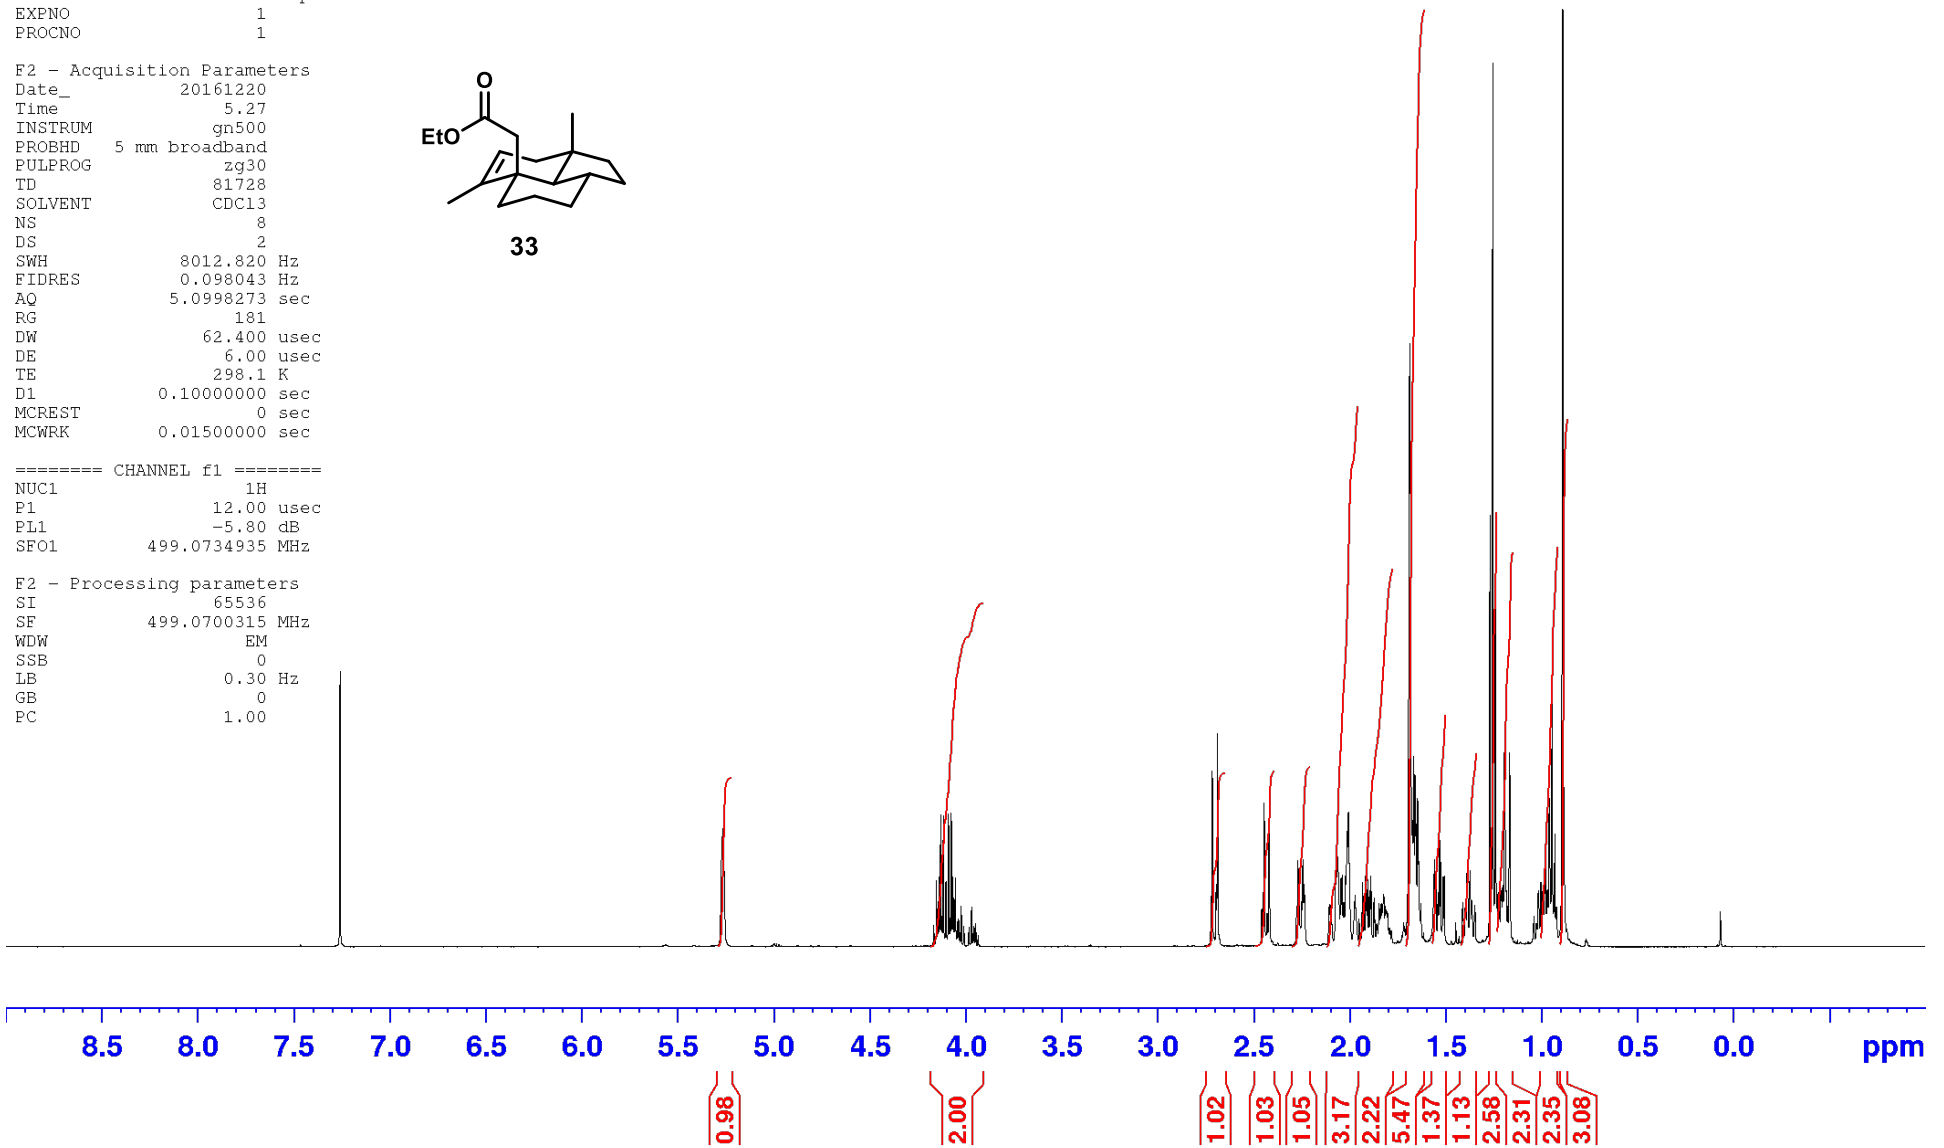

Current Data Parameters  
NAME JC 2-137 SOCl2 top  
EXPNO 2  
PROCNO 1

F2 - Acquisition Parameters  
Date\_ 20161220  
Time 5.24  
INSTRUM gn500  
PROBHD 5 mm broadband  
PULPROG zgdc30  
TD 65536  
SOLVENT CDC13  
NS 42  
DS 4  
SWH 30303.031 Hz  
FIDRES 0.462388 Hz  
AQ 1.0813440 sec  
RG 14596.5  
DW 16.500 usec  
DE 4.50 usec  
TE 298.1 K  
D1 2.00000000 sec  
d11 0.03000000 sec  
MCREST 0 sec  
MCWRK 0.01500000 sec

==== CHANNEL f1 =====  
NUC1 13C  
P1 9.00 usec  
PL1 -0.60 dB  
SFO1 125.5050550 MHz

==== CHANNEL f2 =====  
CPDPRG[2] waltz16  
NUC2 1H  
PCPD2 80.00 usec  
PL2 -3.00 dB  
PL12 12.80 dB  
SFO2 499.0724953 MHz

F2 - Processing parameters  
SI 65536  
SF 125.4912384 MHz  
WDW EM  
SSB 0  
LB 1.00 Hz  
GB 0  
PC 2.00

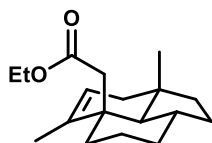

33

173.69

141.12

122.88

60.86  
60.21

42.62  
42.25  
41.03  
38.08  
37.45  
34.65  
33.78  
28.77  
23.26  
23.03  
18.72  
14.31

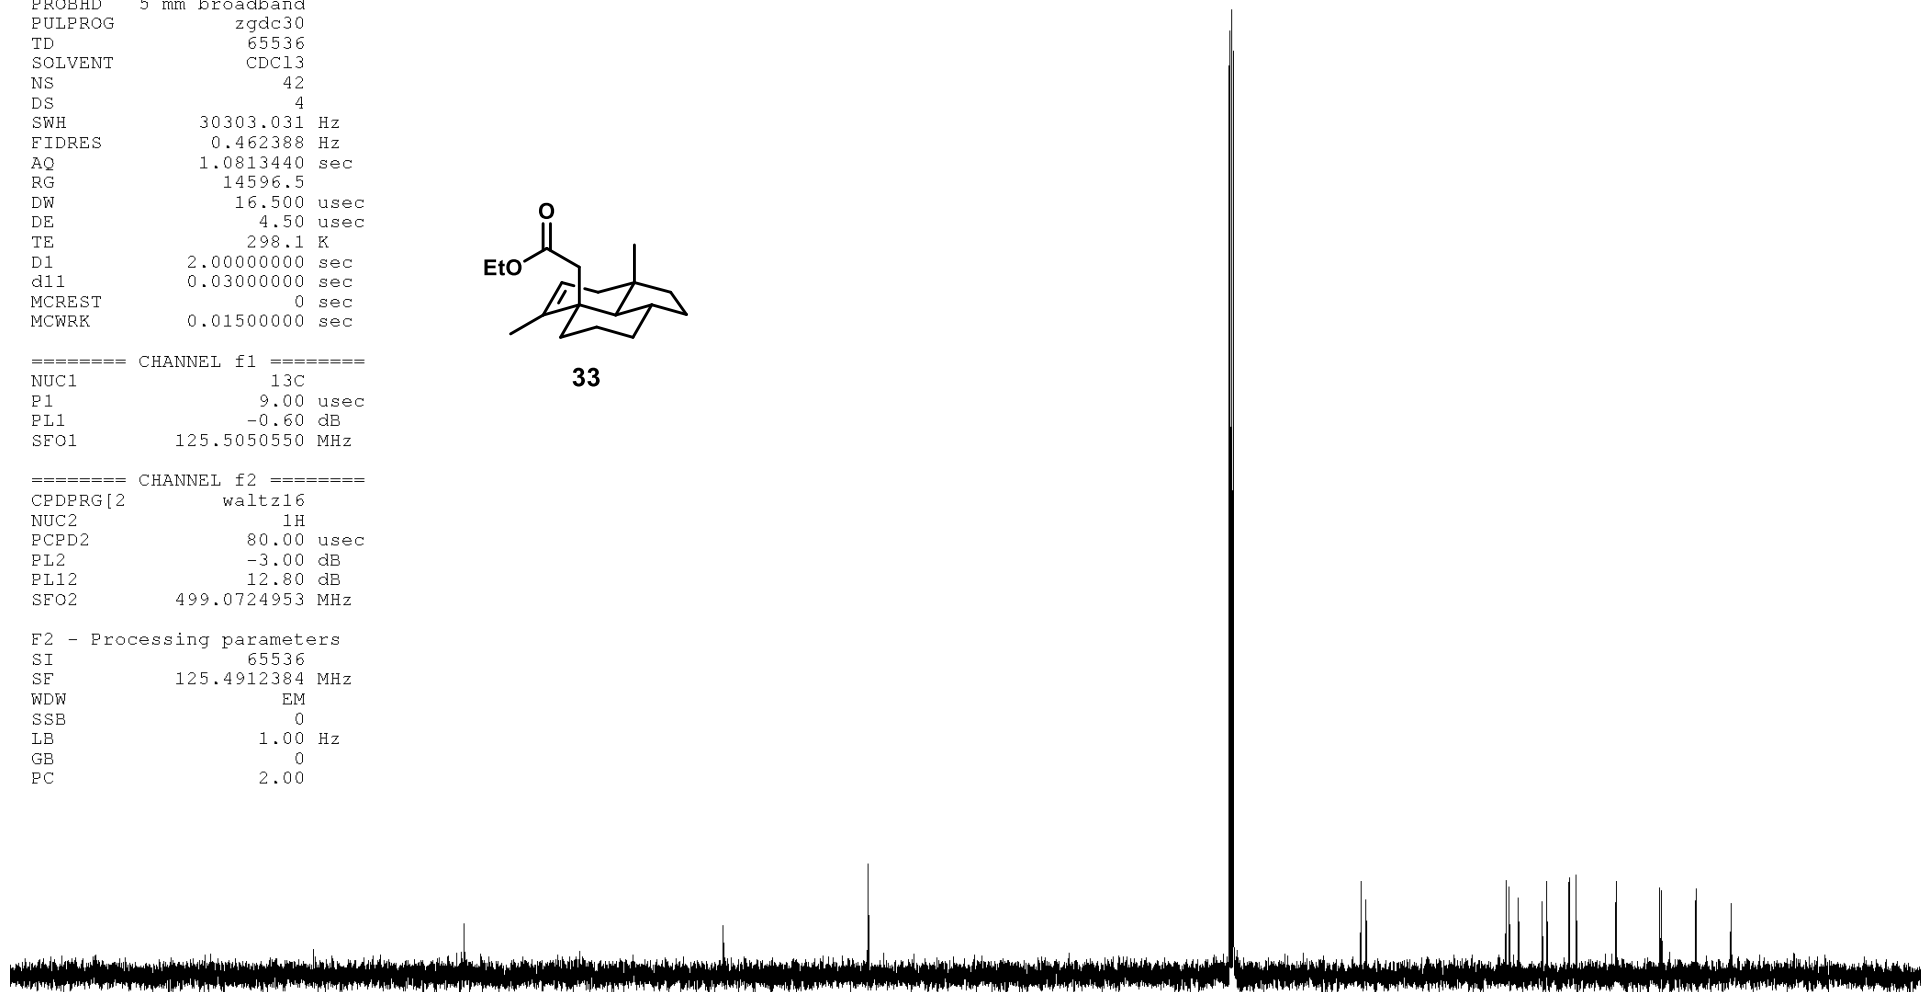

220 210 200 190 180 170 160 150 140 130 120 110 100 90 80 70 60 50 40 30 20 10 ppm



9.96  
9.95  
9.94

5.32  
2.69  
2.68  
2.66  
2.65  
2.51  
2.51  
2.48  
2.48  
2.11  
2.10  
2.06  
2.03  
2.01  
1.98  
1.96  
1.94  
1.94  
1.93  
1.92  
1.91  
1.90  
1.89  
1.87  
1.86  
1.85  
1.83  
1.82  
1.80  
1.79  
1.70  
1.69  
1.68  
1.67  
1.66  
1.57  
1.56  
1.55  
1.54  
1.53  
1.52  
1.51  
1.50  
1.50  
1.48  
1.48  
1.47  
1.44  
1.43  
1.41  
1.40  
1.39  
1.38

Current Data Parameters  
NAME JC 2-144 DMP col  
EXPNO 1  
PROCNO 1

F2 - Acquisition Parameters  
Date\_ 20161222  
Time 21.11  
INSTRUM cryo500  
PROBHD 5 mm CPTCI 1H-  
PULPROG zg30  
TD 81728  
SOLVENT CDCl3  
NS 8  
DS 2  
SWH 8012.820 Hz  
FIDRES 0.098043 Hz  
AQ 5.0998273 sec  
RG 5.7  
DW 62.400 usec  
DE 6.00 usec  
TE 298.0 K  
D1 0.10000000 sec  
MCREST 0 sec  
MCWRK 0.01500000 sec

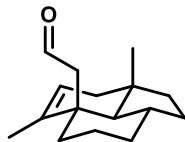

34

==== CHANNEL f1 =====  
NUC1 1H  
P1 7.50 usec  
PL1 1.60 dB  
SFO1 500.2235015 MHz

F2 - Processing parameters  
SI 65536  
SF 500.2200320 MHz  
WDW EM  
SSB 0  
LB 0.30 Hz  
GB 0  
PC 1.00

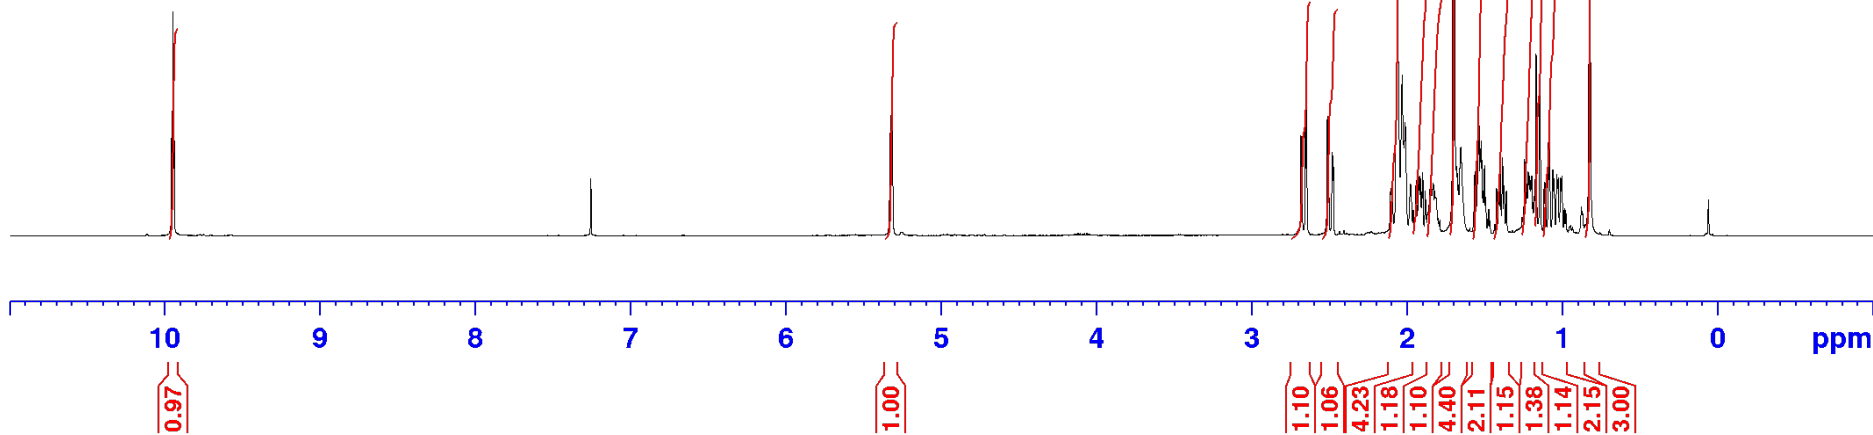

Current Data Parameters  
NAME JC 2-144 DMP cool  
EXPNO 2  
PROCNO 1

F2 - Acquisition Parameters  
Date\_ 20161222  
Time 21.13  
INSTRUM cryo500  
PROBHD 5 mm CPTCI 1H-  
PULPROG SpinEcho30gp.prd  
TD 65536  
SOLVENT CDCl3  
NS 32  
DS 16  
SWH 30303.031 Hz  
FIDRES 0.462388 Hz  
AQ 1.0813440 sec  
RG 7298.2  
DW 16.500 usec  
DE 6.00 usec  
TE 298.0 K  
D1 1.00000000 sec  
d11 0.03000000 sec  
D16 0.00020000 sec  
d17 0.00019600 sec  
MCREST 0 sec  
MCWRK 0.01500000 sec  
F2 33.10 usec

----- CHANNEL f1 -----  
NUC1 13C  
P1 16.55 usec  
P11 500.00 usec  
P12 2000.00 usec  
PL0 120.00 dB  
PL1 -1.00 dB  
SFO1 125.7942548 MHz  
SP1 2.70 dB  
SP2 2.70 dB  
SPNAM[1] Crp60, 0.5, 20.1  
SPNAM[2] Crp60comp.4  
SPOFF1 0 Hz  
SPOFF2 0 Hz

----- CHANNEL f2 -----  
CPDPRG2 waltz16  
NUC2 1H  
PCPD2 100.00 usec  
PL2 1.60 dB  
PL12 24.50 dB  
SFO2 500.2225011 MHz

----- GRADIENT CHANNEL -----  
GPNAM[1] SINE.100  
GPNAM[2] SINE.100  
GPX1 0 %  
GPX2 0 %  
GPY1 0 %  
GPY2 0 %  
GPZ1 30.00 %  
GPZ2 50.00 %  
p15 500.00 usec  
p16 1000.00 usec

F2 - Processing parameters  
SI 65536  
SF 125.7804101 MHz  
WDW EM  
SSB 0  
LB 1.00 Hz  
GB 0  
PC 2.00

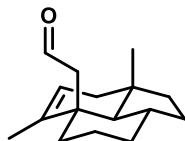

34

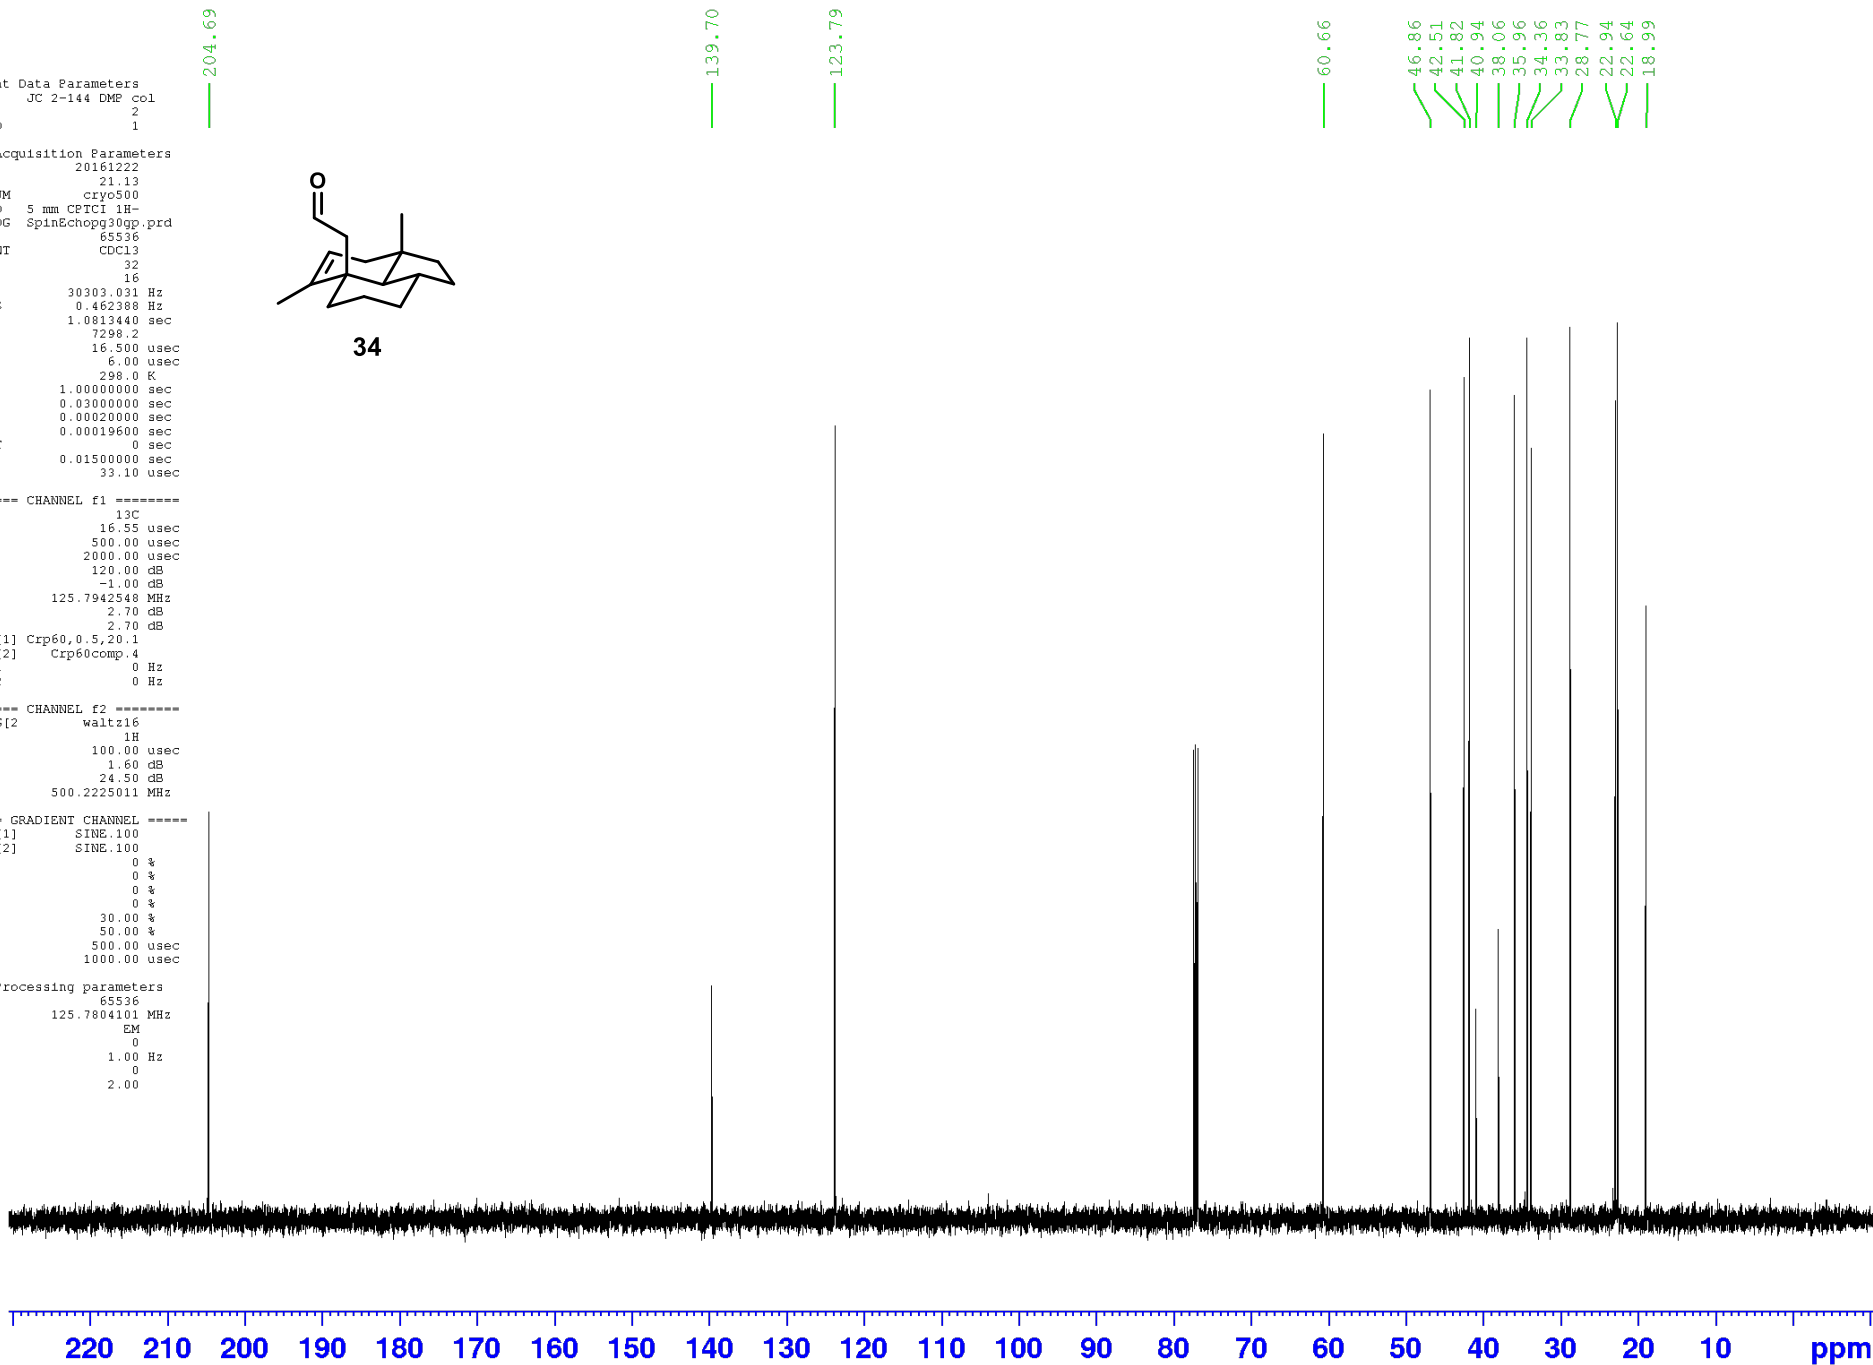

5.24  
5.24  
2.61  
2.60  
2.59  
2.58  
2.57  
2.55  
2.55  
2.54  
2.54  
2.53  
2.52  
2.52  
2.09  
2.09  
2.08  
2.05  
2.04  
2.03  
2.02  
2.01  
2.01  
1.99  
1.98  
1.97  
1.93  
1.92  
1.91  
1.90  
1.90  
1.89  
1.89  
1.88  
1.88  
1.82  
1.81  
1.80  
1.79  
1.79  
1.77  
1.76  
1.70  
1.65  
1.65  
1.64  
1.63  
1.62  
1.62  
1.61  
1.55  
1.54  
1.54  
1.53  
1.52  
1.51  
1.41  
1.39  
1.38  
1.38  
1.37  
1.36  
1.35  
1.34  
1.33  
1.32  
1.30  
1.21  
1.20  
1.20  
1.19  
1.18  
1.17  
1.16  
0.98  
0.98  
0.97  
0.96  
0.95  
0.95  
0.92  
0.90

Current Data Parameters  
 NAME JC 2-148 HCl col  
 EXPNO 1  
 PROCNO 1

F2 - Acquisition Parameters  
 Date\_ 20161224  
 Time 9.00  
 INSTRUM cryo500  
 PROBHD 5 mm CPTCI 1H-  
 PULPROG zg30  
 TD 81728  
 SOLVENT CDC13  
 NS 8  
 DS 2  
 SWH 8012.820 Hz  
 FIDRES 0.098043 Hz  
 AQ 5.0998273 sec  
 RG 7.1  
 DW 62.400 usec  
 DE 6.00 usec  
 TE 298.0 K  
 DL 0.10000000 sec  
 MCREST 0 sec  
 MCWRK 0.01500000 sec

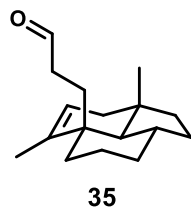

==== CHANNEL f1 =====  
 NUC1 1H  
 P1 7.50 usec  
 PL1 1.60 dB  
 SFO1 500.2235015 MHz

F2 - Processing parameters  
 SI 65536  
 SF 500.2200315 MHz  
 WDW EM  
 SSB 0  
 LB 0.30 Hz  
 GB 0  
 PC 1.00

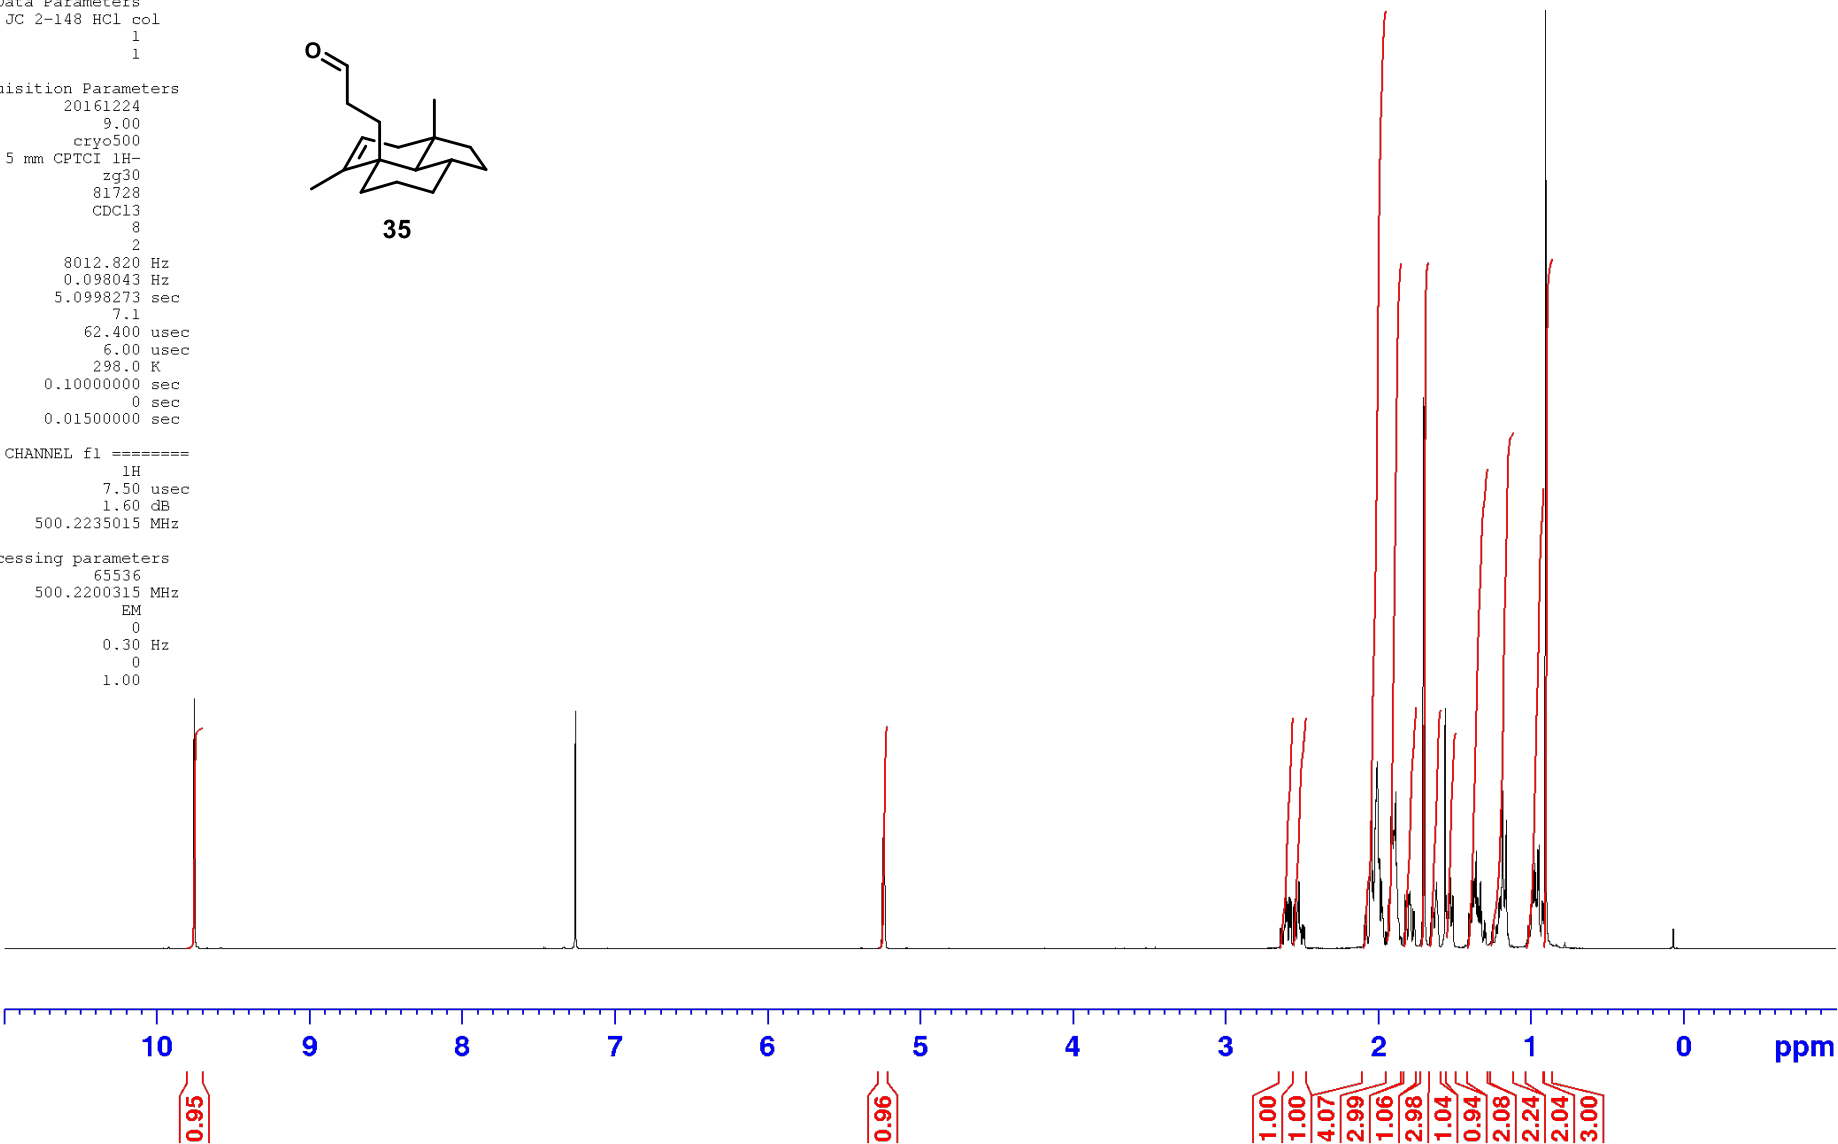

Current Data Parameters  
NAME JC 2-148 HCl col  
EXPNO 2  
PROCNO 1

F2 - Acquisition Parameters  
Date\_ 20161224  
Time\_ 9.04  
INSTRUM cryo500  
PROBHD 5 mm CP1CI 1H-  
PULPROG SpinEcho30pp.prd  
TD 65536  
SOLVENT CDCl3  
NS 41  
DS 16  
SWH 30303.031 Hz  
FIDRES 0.462388 Hz  
AQ 1.0813440 sec  
RG 7298.2  
DW 16.500 usec  
DE 6.00 usec  
TE 298.0 K  
D1 1.00000000 sec  
d11 0.03000000 sec  
D16 0.00020000 sec  
d17 0.00019600 sec  
MCREST 0 sec  
MCWRK 0.01500000 sec  
F2 33.10 usec

----- CHANNEL f1 -----  
NUC1 13C  
P1 16.55 usec  
P11 500.00 usec  
P12 2000.00 usec  
PL0 120.00 dB  
PL1 -1.00 dB  
SFO1 125.7942548 MHz  
SP1 2.70 dB  
SP2 2.70 dB  
SPNAM[1] Crp60,0.5,20.1  
SPNAM[2] Crp60comp.4  
SPOFF1 0 Hz  
SPOFF2 0 Hz

----- CHANNEL f2 -----  
CPDPRG2 waltz16  
NUC2 1H  
PCPD2 100.00 usec  
PL2 1.60 dB  
PL12 24.50 dB  
SFO2 500.2225011 MHz

----- GRADIENT CHANNEL -----  
GPNAM[1] SINE.100  
GPNAM[2] SINE.100  
GPX1 0 %  
GPX2 0 %  
GPY1 0 %  
GPY2 0 %  
GZ1 30.00 %  
GZ2 50.00 %  
p15 500.00 usec  
p16 1000.00 usec

F2 - Processing parameters  
SI 65536  
SF 125.7804080 MHz  
WDW EM  
SSB 0  
LB 1.00 Hz  
GB 0  
PC 2.00

203.01

141.37

123.07

60.86

42.75  
42.19  
41.22  
39.64  
38.15  
34.48  
34.46  
33.79  
28.79  
24.29  
23.63  
23.00  
19.90

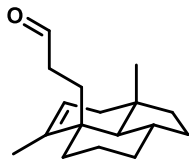

35

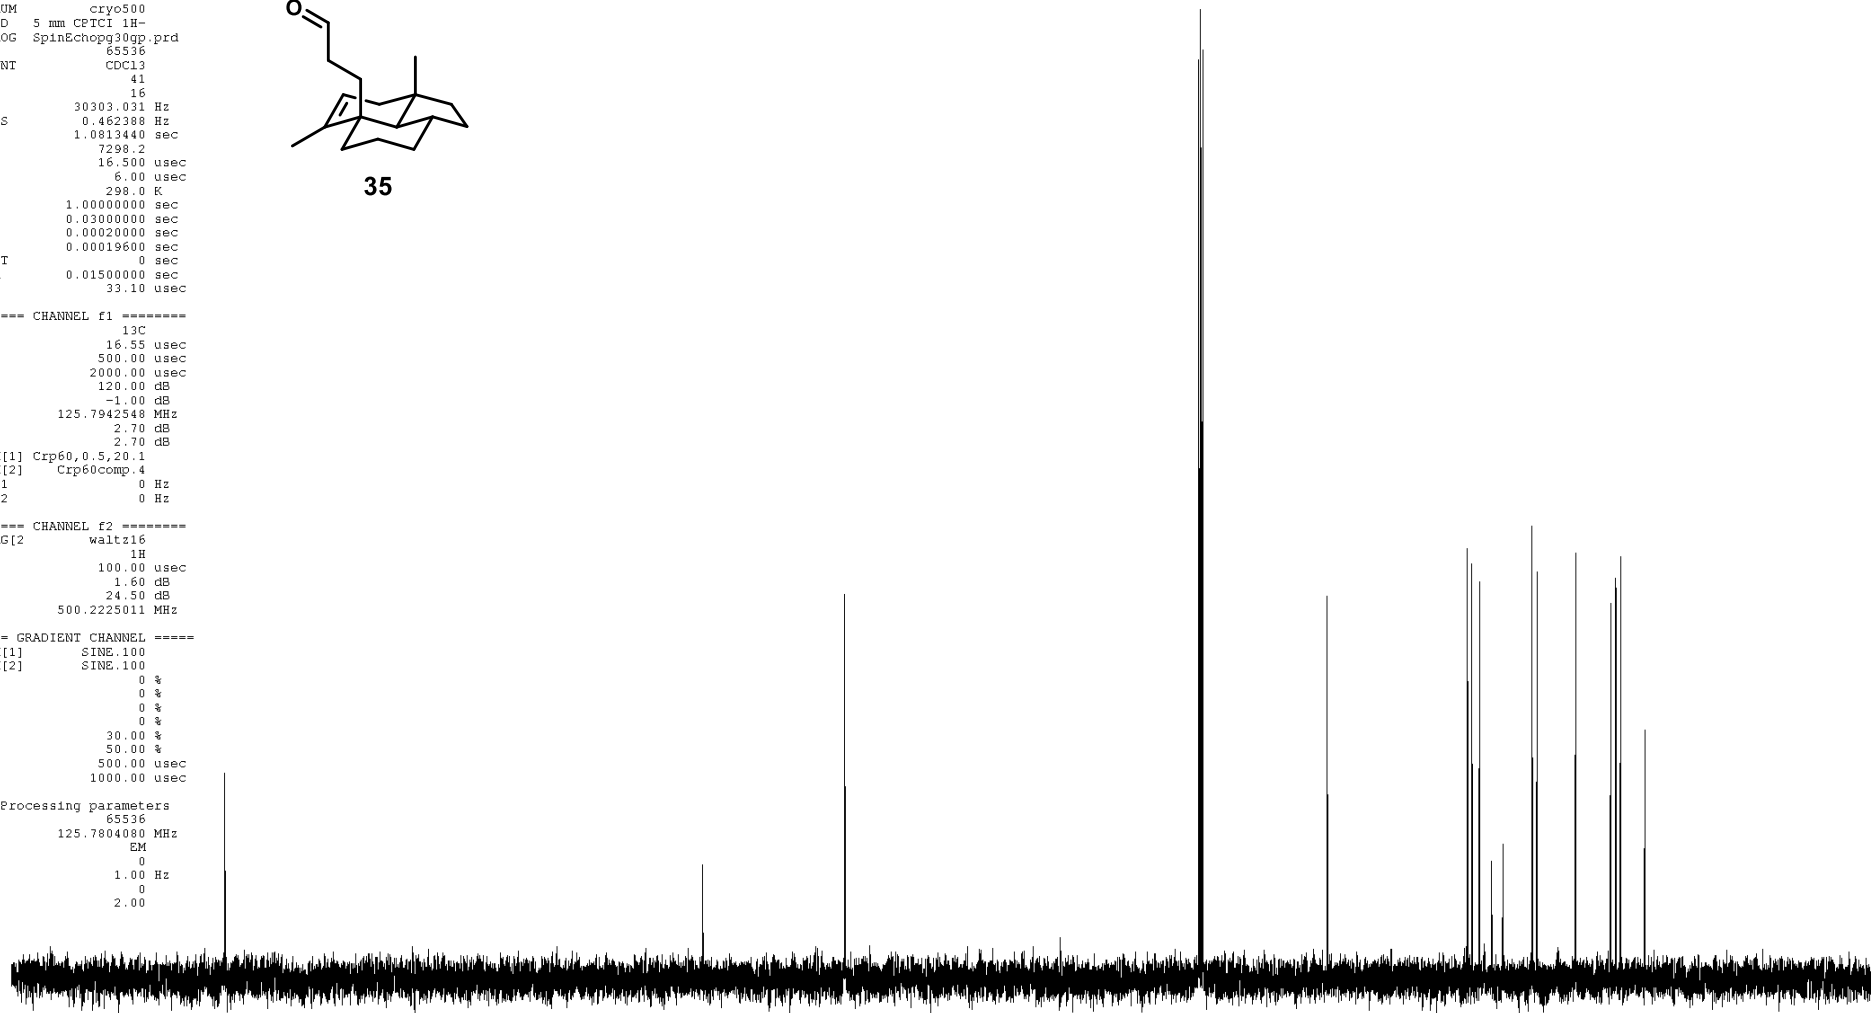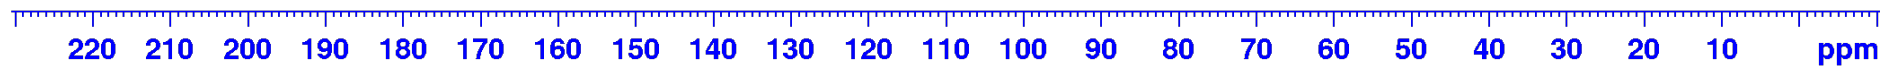

Current Data Parameters  
NAME MG 1-128 Fr 16-15  
EXPNO 1  
PROCNO 1

F2 - Acquisition Parameters  
Date\_ 20171031  
Time 19.41  
INSTRUM av600  
PROBHD 5 mm CPBBO BB-  
PULPROG zg30  
TD 38460  
SOLVENT CDC13  
NS 8  
DS 0  
SWH 9615.385 Hz  
FIDRES 0.250010 Hz  
AQ 1.9999200 sec  
RG 25.4  
DW 52.000 usec  
DE 13.70 usec  
TE 298.2 K  
D1 0.10000000 sec  
TD0 1

==== CHANNEL f1 =====  
SFO1 600.1342009 MHz  
NUC1 1H  
P1 12.00 usec  
PLW1 20.00000000 W

F2 - Processing parameters  
SI 65536  
SF 600.1300000 MHz  
WDW EM  
SSB 0  
LB 0.30 Hz  
GB 0  
PC 1.00

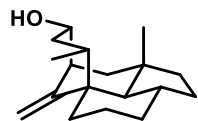

13, tentative structure  
assigned to  
minor component

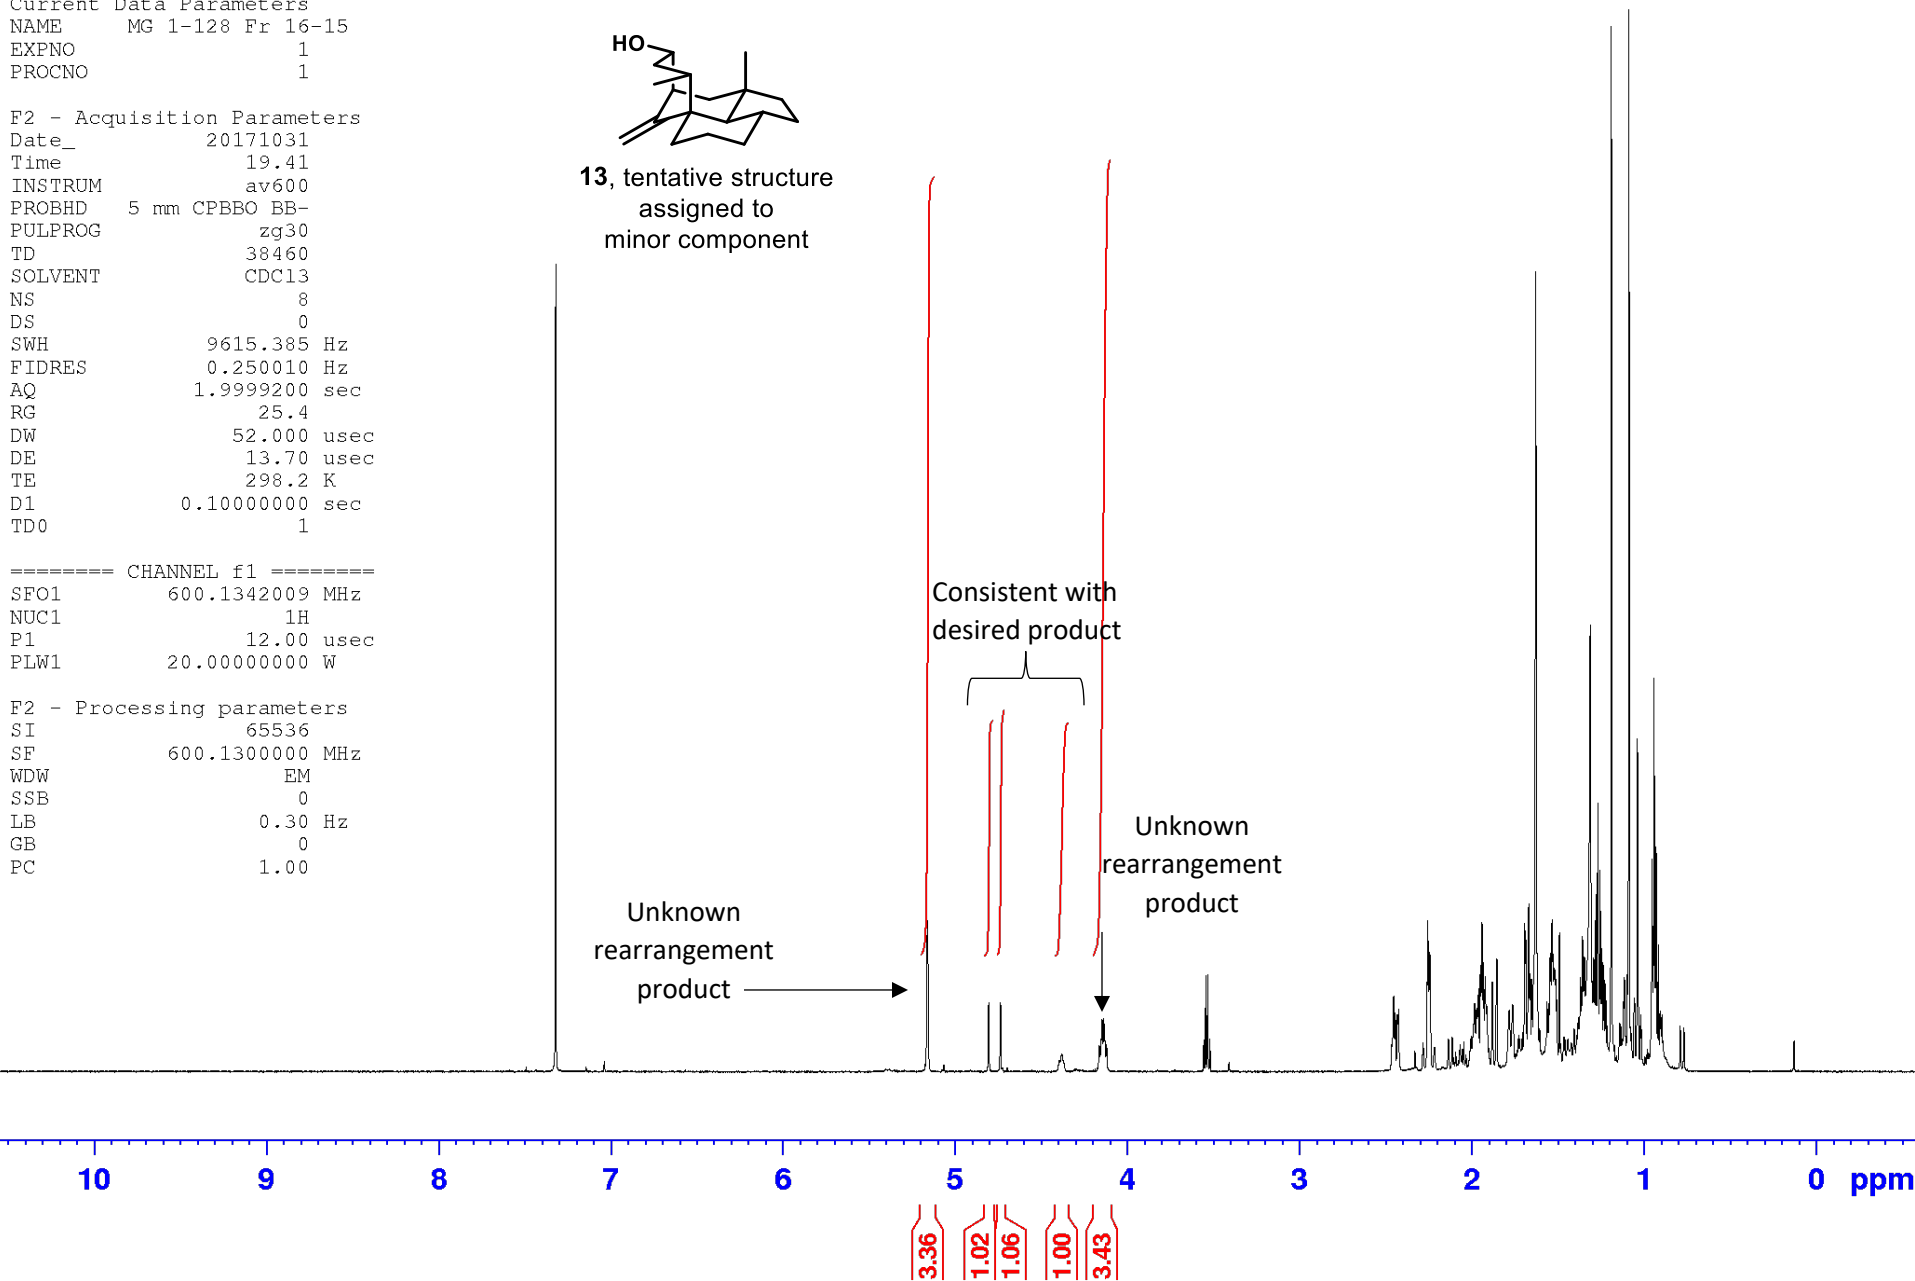

Current Data Parameters  
NAME MG 1-103 Fr 9-19 AlMe3  
EXPNO 1  
PROCNO 1

F2 - Acquisition Parameters  
Date\_ 20170822  
Time 16.45  
INSTRUM cryo500  
PROBHD 5 mm CPTCI 1H-  
PULPROG zg30  
TD 32048  
SOLVENT CDCl3  
NS 8  
DS 0  
SWH 8012.820 Hz  
FIDRES 0.250026 Hz  
AQ 1.9997952 sec  
RG 2.5  
DW 62.400 usec  
DE 6.00 usec  
TE 298.0 K  
D1 0.10000000 sec  
MCREST 0 sec  
MCWRK 0.01500000 sec

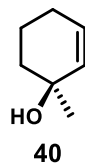

==== CHANNEL f1 =====  
NUC1 1H  
P1 7.50 usec  
PL1 1.60 dB  
SFO1 500.2235015 MHz

F2 - Processing parameters  
SI 65536  
SF 500.2200307 MHz  
WDW EM  
SSB 0  
LB 0.30 Hz  
GB 0  
PC 1.00

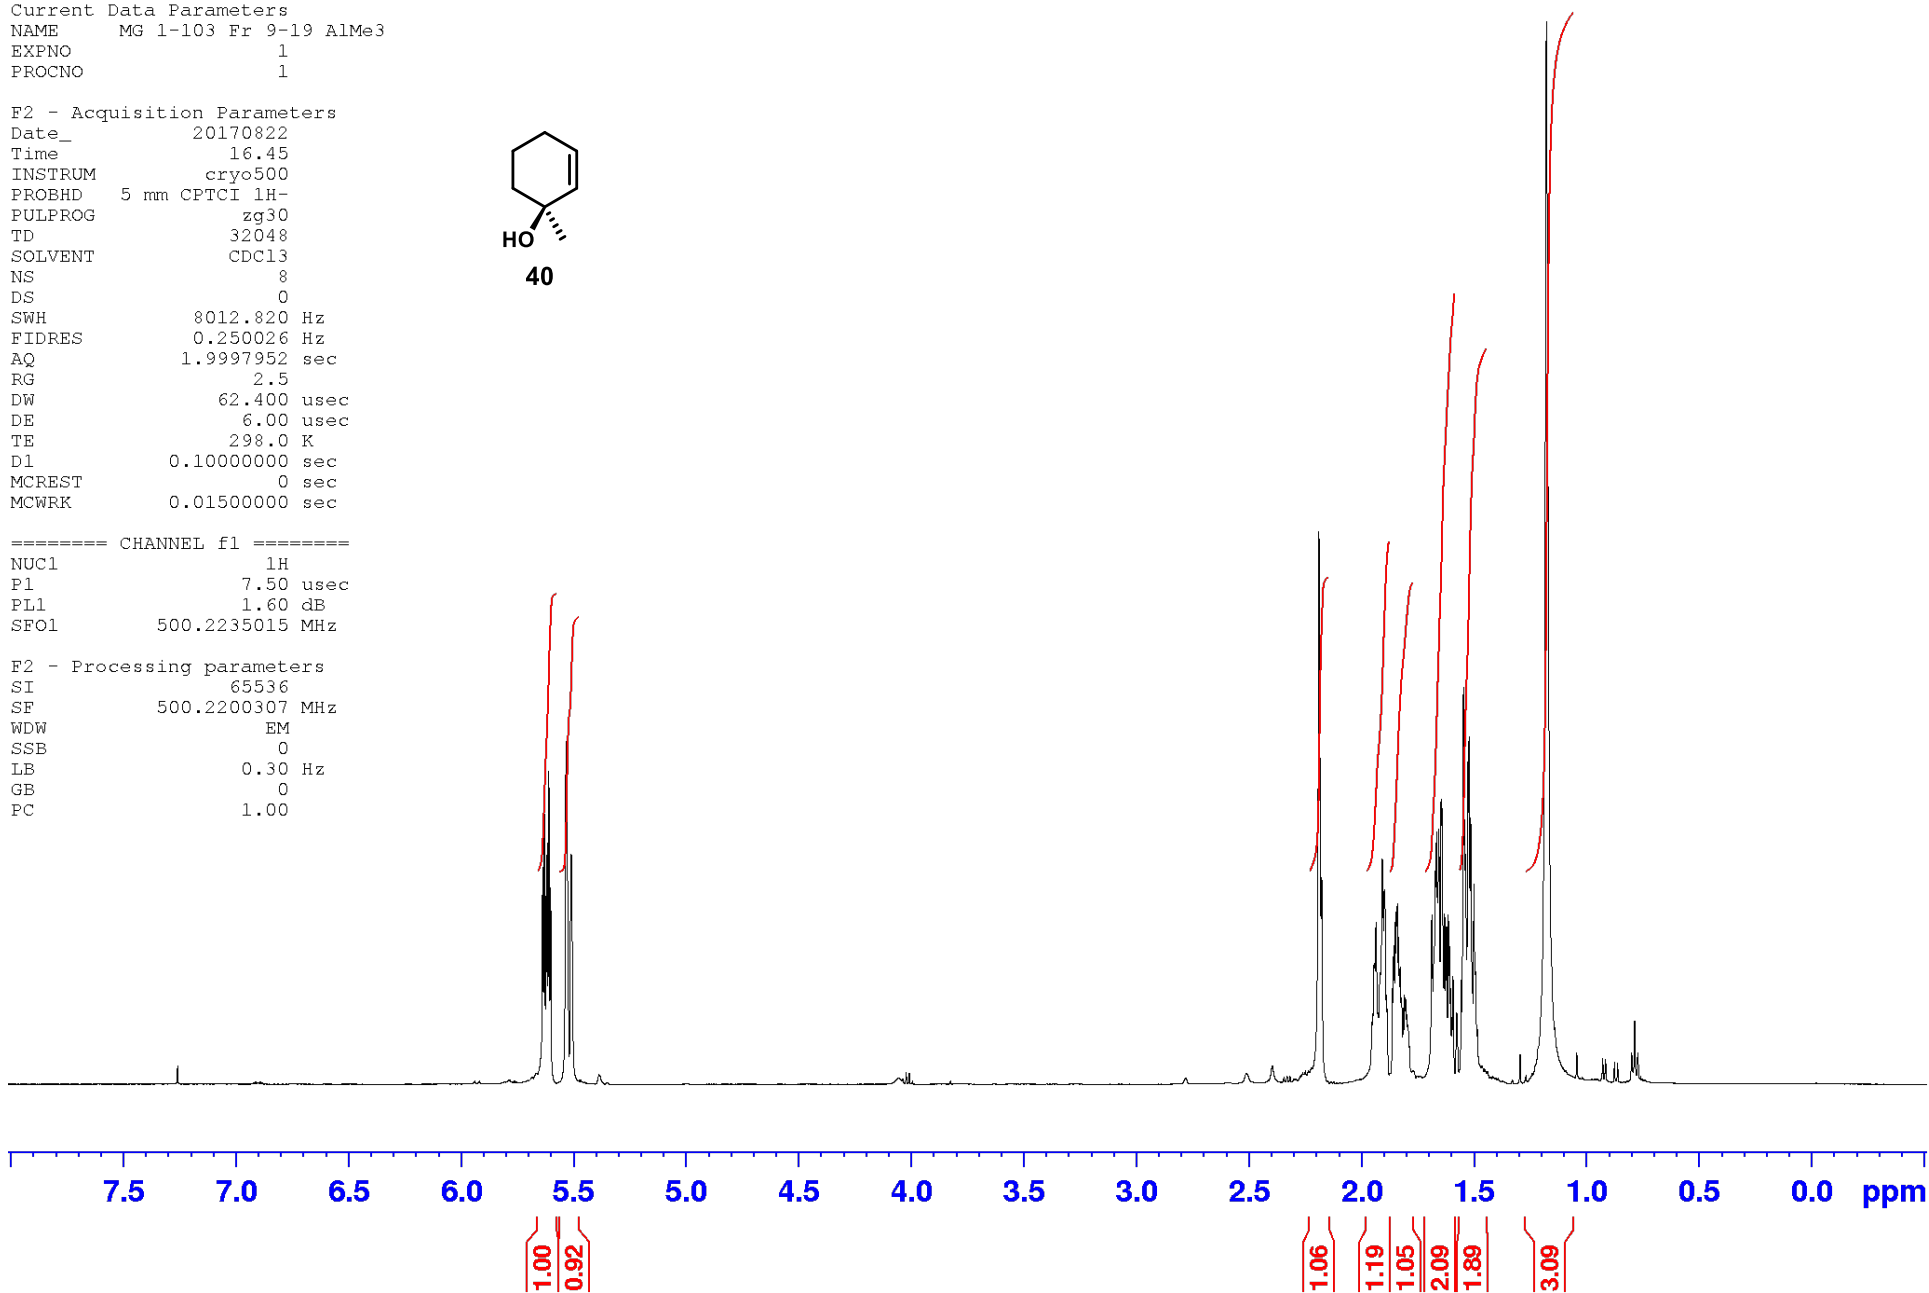

Current Data Parameters  
NAME MG 1-103 Fr 9-19 AlMe3  
EXPNO 2  
PROCNO 1

F2 - Acquisition Parameters  
Date\_ 20170822  
Time 16.47  
INSTRUM cryo500  
PROBHD 5 mm CPTCI 1H-  
PULPROG deptgppp  
TD 65536  
SOLVENT CD3OD  
NS 59  
DS 0  
SWH 30303.031 Hz  
FIDRES 0.462388 Hz  
AQ 1.0813440 sec  
RG 6502  
DW 16.500 usec  
DE 6.00 usec  
TE 298.0 K  
CNST2 145.0000000  
CNST12 1.5000000  
D1 1.0000000 sec  
d2 0.00344828 sec  
d12 0.00002000 sec  
D16 0.00020000 sec  
DELTA 0.00001707 sec  
DELTA1 0.00228023 sec  
DELTA2 0.00226483 sec  
DELTA3 0.00224828 sec  
MCREST 0 sec  
MCWRK 0.01500000 sec

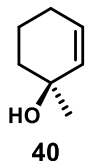

===== CHANNEL f1 =====  
NUC1 13C  
P1 16.55 usec  
P12 2000.00 usec  
PL0 120.00 dB  
PL1 -1.00 dB  
SF01 125.7942548 MHz  
SP2 2.70 dB  
SPNAM[2] Crp60comp.4  
SPOFF2 0 Hz

===== CHANNEL f2 =====  
CPDPRG[2] waltz16  
NUC2 1H  
p0 11.55 usec  
p3 7.70 usec  
p4 15.40 usec  
PCPD2 100.00 usec  
PL2 1.60 dB  
PL12 24.50 dB  
SF02 500.2225011 MHz

===== GRADIENT CHANNEL =====  
GPNAM[1] SINE.100  
GPNAM[2] SINE.100  
GPNAM[3] SINE.100  
GPX1 0 %  
GPX2 0 %  
GPX3 0 %  
GPY1 0 %  
GPY2 0 %  
GPY3 0 %  
GPZ1 31.00 %  
GPZ2 31.00 %  
GPZ3 31.00 %  
P16 1000.00 usec

F2 - Processing parameters  
SI 65536  
SF 125.7804264 MHz  
WDW EM  
SSB 0  
LB 1.00 Hz  
GB 0  
PC 2.00

133.89  
128.47

67.76

37.75

29.26

24.95

19.43

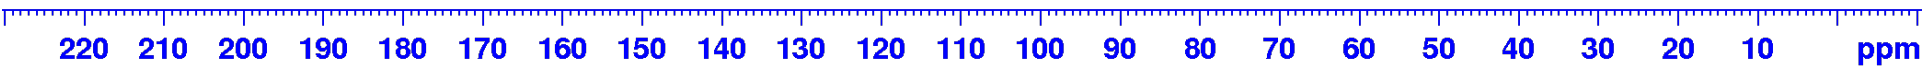

Current Data Parameters  
NAME MG 2-254 crude TBSCl  
EXPNO 1  
PROCNO 1

F2 - Acquisition Parameters  
Date\_ 20180412  
Time 13.29  
INSTRUM av600  
PROBHD 5 mm CPBBO BB-  
PULPROG zg30  
TD 38460  
SOLVENT CDC13  
NS 8  
DS 0  
SWH 9615.385 Hz  
FIDRES 0.250010 Hz  
AQ 1.9999200 sec  
RG 10  
DW 52.000 usec  
DE 14.07 usec  
TE 298.0 K  
D1 0.10000000 sec  
TD0 1

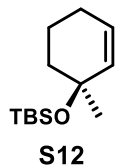

===== CHANNEL f1 =====  
SFO1 600.1342009 MHz  
NUC1 1H  
P1 10.25 usec  
PLW1 20.00000000 W

F2 - Processing parameters  
SI 65536  
SF 600.1300360 MHz  
WDW EM  
SSB 0  
LB 0.30 Hz  
GB 0  
PC 1.00

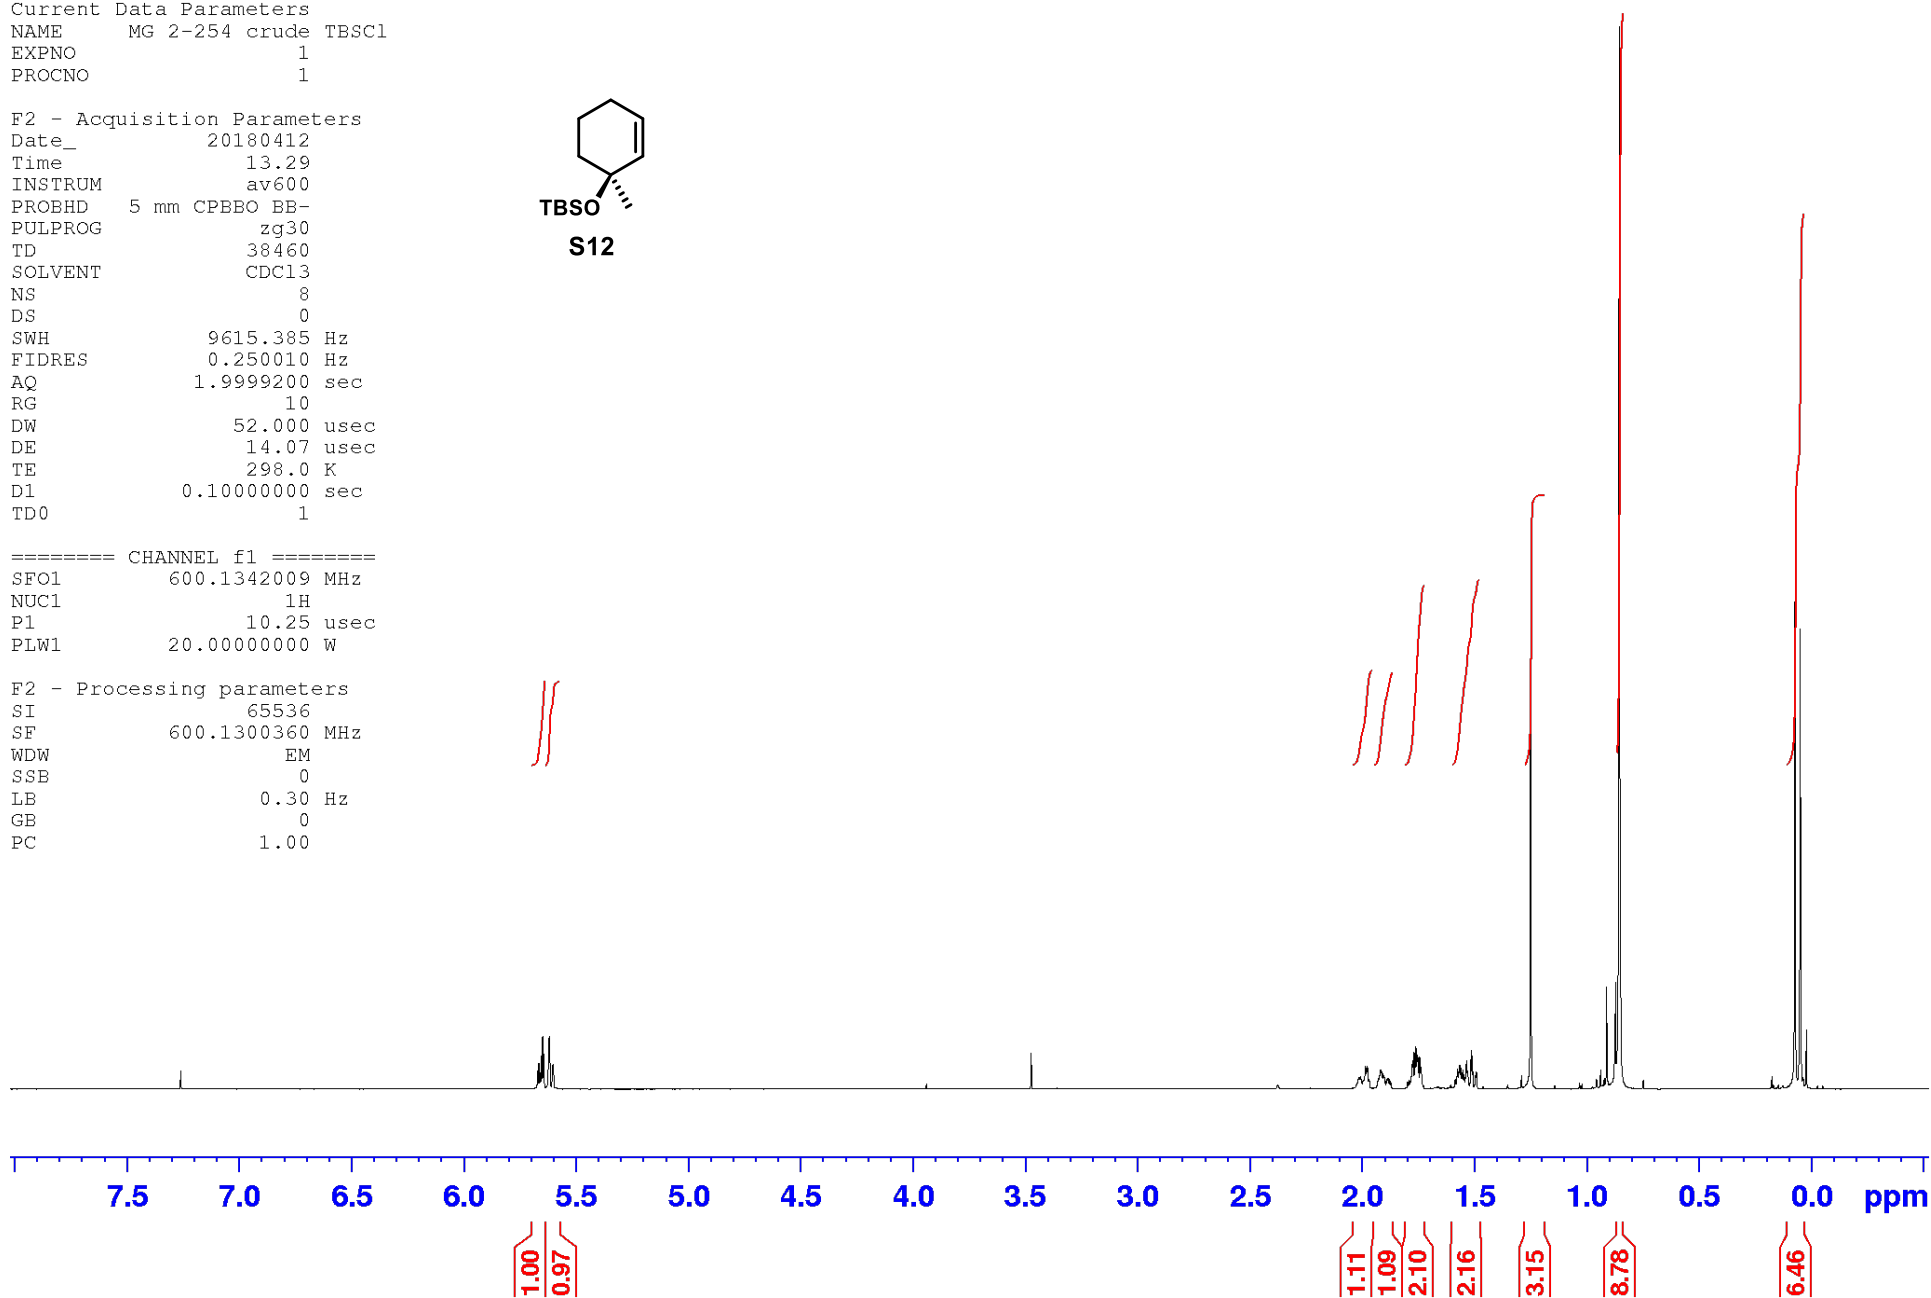



Current Data Parameters  
NAME MG 2-254 crude TBSC1  
EXPNO 2  
PROCNO 1

F2 - Acquisition Parameters  
Date\_ 20180412  
Time 13.37  
INSTRUM av600  
PROBHD 5 mm CPBBO BB-  
PULPROG deptgpgp  
TD 65536  
SOLVENT CDCl3  
NS 72  
DS 0  
SWH 36231.883 Hz  
FIDRES 0.552855 Hz  
AQ 0.9043968 sec  
RG 2050  
DW 13.800 usec  
DE 18.00 usec  
TE 298.0 K  
CNST2 145.000000  
CNST12 1.500000  
D1 2.0000000 sec  
D2 0.00344828 sec  
D12 0.00002000 sec  
D16 0.00020000 sec

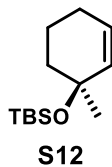

134.77  
127.87

77.37  
77.16  
76.94  
70.40

38.96  
30.91  
25.97  
25.25  
19.65

-1.86  
-2.06

==== CHANNEL f1 =====  
SFO1 150.9194080 MHz  
NUC1 13C  
P1 10.00 usec  
P13 2000.00 usec  
PLW0 0 W  
PLW1 64.00000000 W  
SPNAM[5] Crp60comp.4  
SPOAL5 0.500  
SPOFFS5 0 Hz  
SPW5 11.50000000 W

==== CHANNEL f2 =====  
SFO2 600.1330010 MHz  
NUC2 1H  
CPDPRG[2] waltz16  
P0 15.38 usec  
P3 10.25 usec  
P4 20.50 usec  
PCPD2 80.00 usec  
PLW2 20.00000000 W  
PLW12 0.33113000 W

==== GRADIENT CHANNEL =====  
GPNAM[1] SMSQ10.100  
GPNAM[2] SMSQ10.100  
GPNAM[3] SMSQ10.100  
GPZ1 31.00 %  
GPZ2 31.00 %  
GPZ3 31.00 %  
P16 1000.00 usec

F2 - Processing parameters  
SI 65536  
SF 150.9028085 MHz  
WDW EM  
SSB 0  
LB 1.00 Hz  
GB 0  
PC 1.00

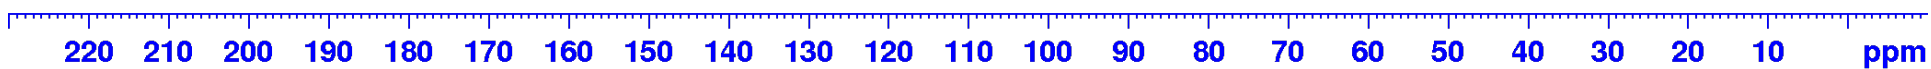

Current Data Parameters  
NAME JC 3-188 Rh ocl3 PUB  
EXPNO 1  
PROCNO 1

F2 - Acquisition Parameters  
Date\_ 20201010  
Time 2.37  
INSTRUM av600  
PROBHD 5 mm CPBBO BB-  
PULPROG zg30  
TD 98074  
SOLVENT CDCl3  
NS 8  
DS 2  
SWH 9615.385 Hz  
FIDRES 0.098042 Hz  
AQ 5.0998478 sec  
RG 10  
DW 52.000 usec  
DE 13.70 usec  
TE 298.0 K  
DL 0.10000000 sec  
TDO 1

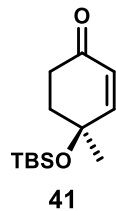

----- CHANNEL f1 -----  
SFO1 600.1342009 MHz  
NUC1 1H  
P1 12.00 usec  
PLW1 28.00000000 W

F2 - Processing parameters  
SI 65536  
SF 600.1300349 MHz  
WDW EM  
SSB 0  
LB 0.30 Hz  
GB 0  
PC 1.00

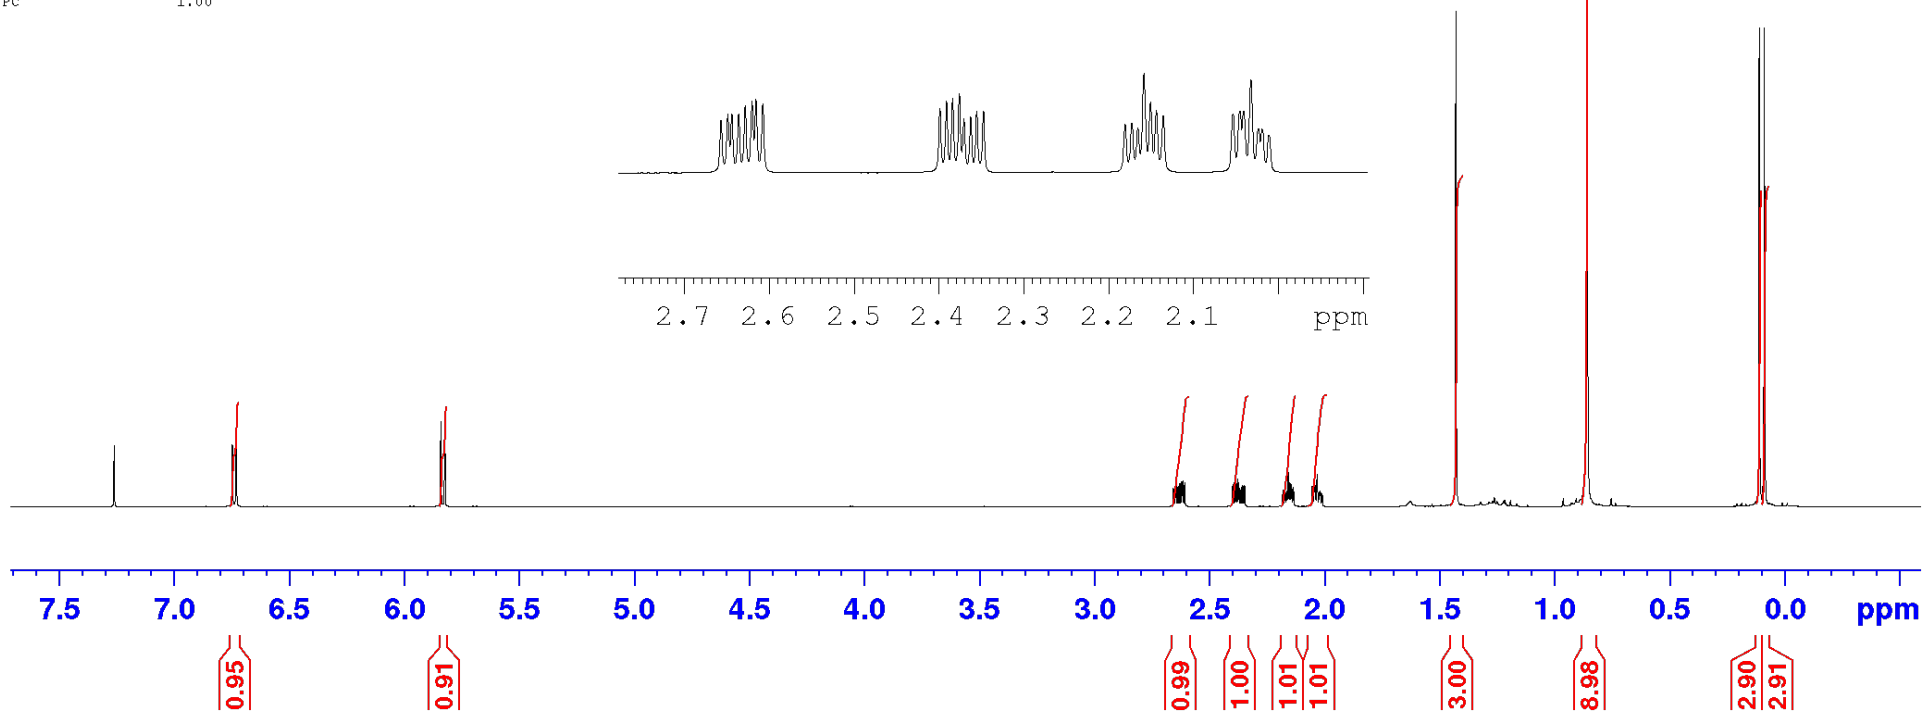

Current Data Parameters  
NAME JC 3-188 Rh col3 PUB  
EXPNO 2  
PROCNO 1

F2 - Acquisition Parameters  
Date\_ 20201010  
Time 2.41  
INSTRUM av600  
PROBHD 5 mm CPBBO BB-  
PULPROG zgdc30  
TD 65536  
SOLVENT CDCl3  
NS 85  
DS 4  
SWH 36231.883 Hz  
FIDRES 0.552855 Hz  
AQ 0.9043968 sec  
RG 2050  
DW 13.800 usec  
DE 19.65 usec  
TE 298.0 K  
D1 0.40000001 sec  
D11 0.03000000 sec  
TD0 1

----- CHANNEL f1 -----  
SFO1 150.9194075 MHz  
NUC1 13C  
P1 10.00 usec  
PLW1 65.0000000 W

----- CHANNEL f2 -----  
SFO2 600.1330010 MHz  
NUC2 1H  
CPDPRG[2] waltz16  
PCPD2 80.00 usec  
PLW2 28.0000000 W  
PLW12 0.63000000 W

F2 - Processing parameters  
SI 65536  
SF 150.9027942 MHz  
WDW EM  
SSB 0  
LE 1.00 Hz  
GE 0  
PC 1.00

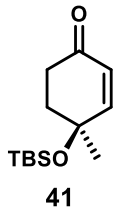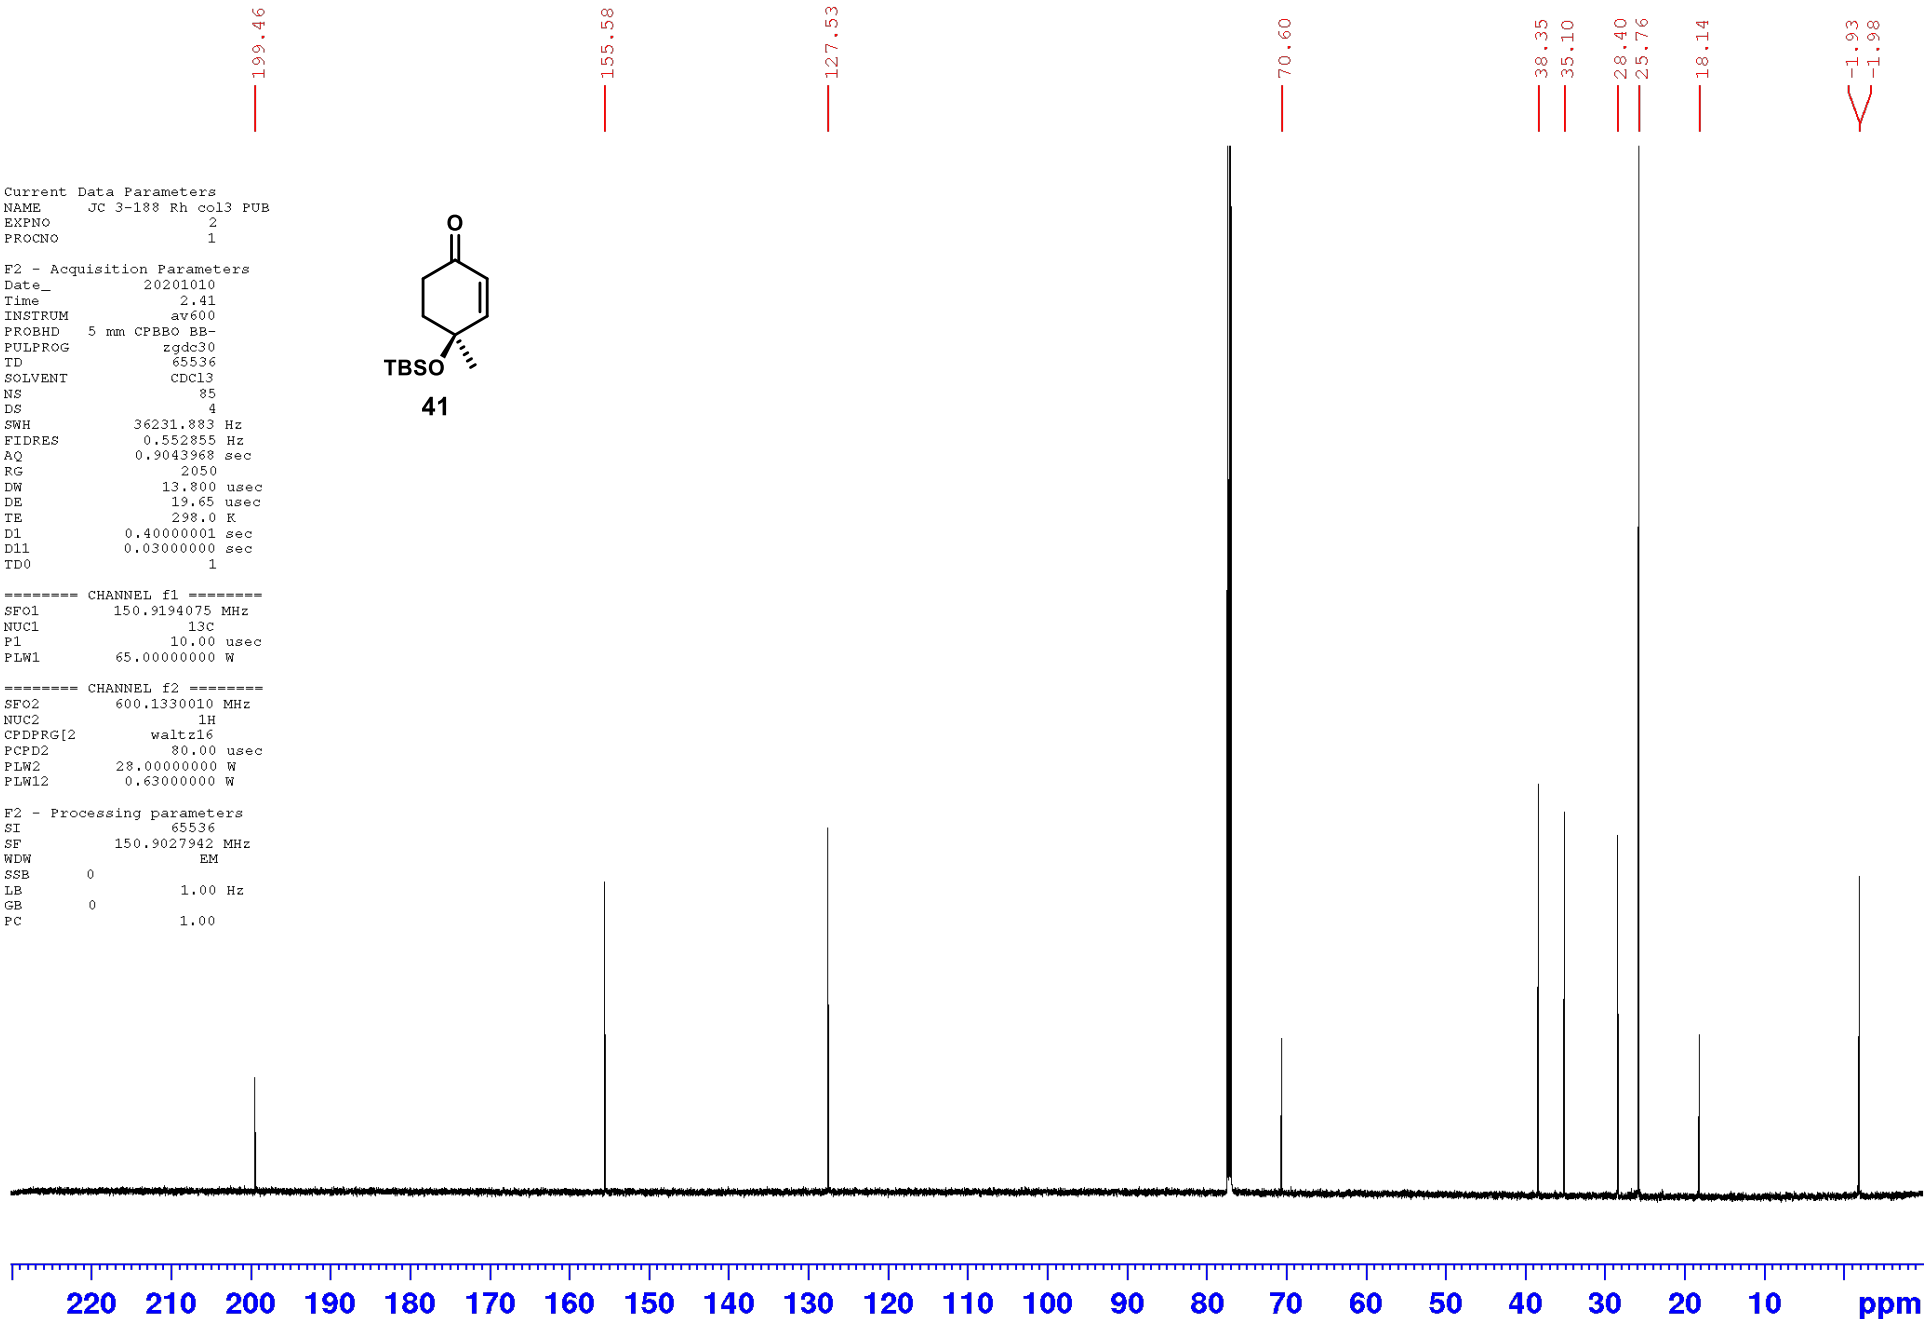

Current Data Parameters  
NAME JC 3-225 top col  
EXPNO 1  
PROCNO 1

F2 - Acquisition Parameters  
Date\_ 20201023  
Time 4.05  
INSTRUM av600  
PROBHD 5 mm CPBBO BB-  
PULPROG zg30  
TD 98074  
SOLVENT CDCl3  
NS 8  
DS 2  
SWH 9615.385 Hz  
FIDRES 0.098042 Hz  
AQ 5.0998478 sec  
RG 8  
DW 52.000 usec  
DE 13.70 usec  
TE 298.0 K  
D1 0.10000000 sec  
TD0 1

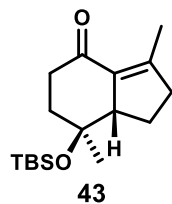

===== CHANNEL f1 =====  
SFO1 600.1342009 MHz  
NUC1 1H  
P1 12.00 usec  
PLW1 28.00000000 W

F2 - Processing parameters  
SI 65536  
SF 600.1300345 MHz  
WDW EM  
SSB 0  
LB 0.30 Hz  
GB 0  
PC 1.00

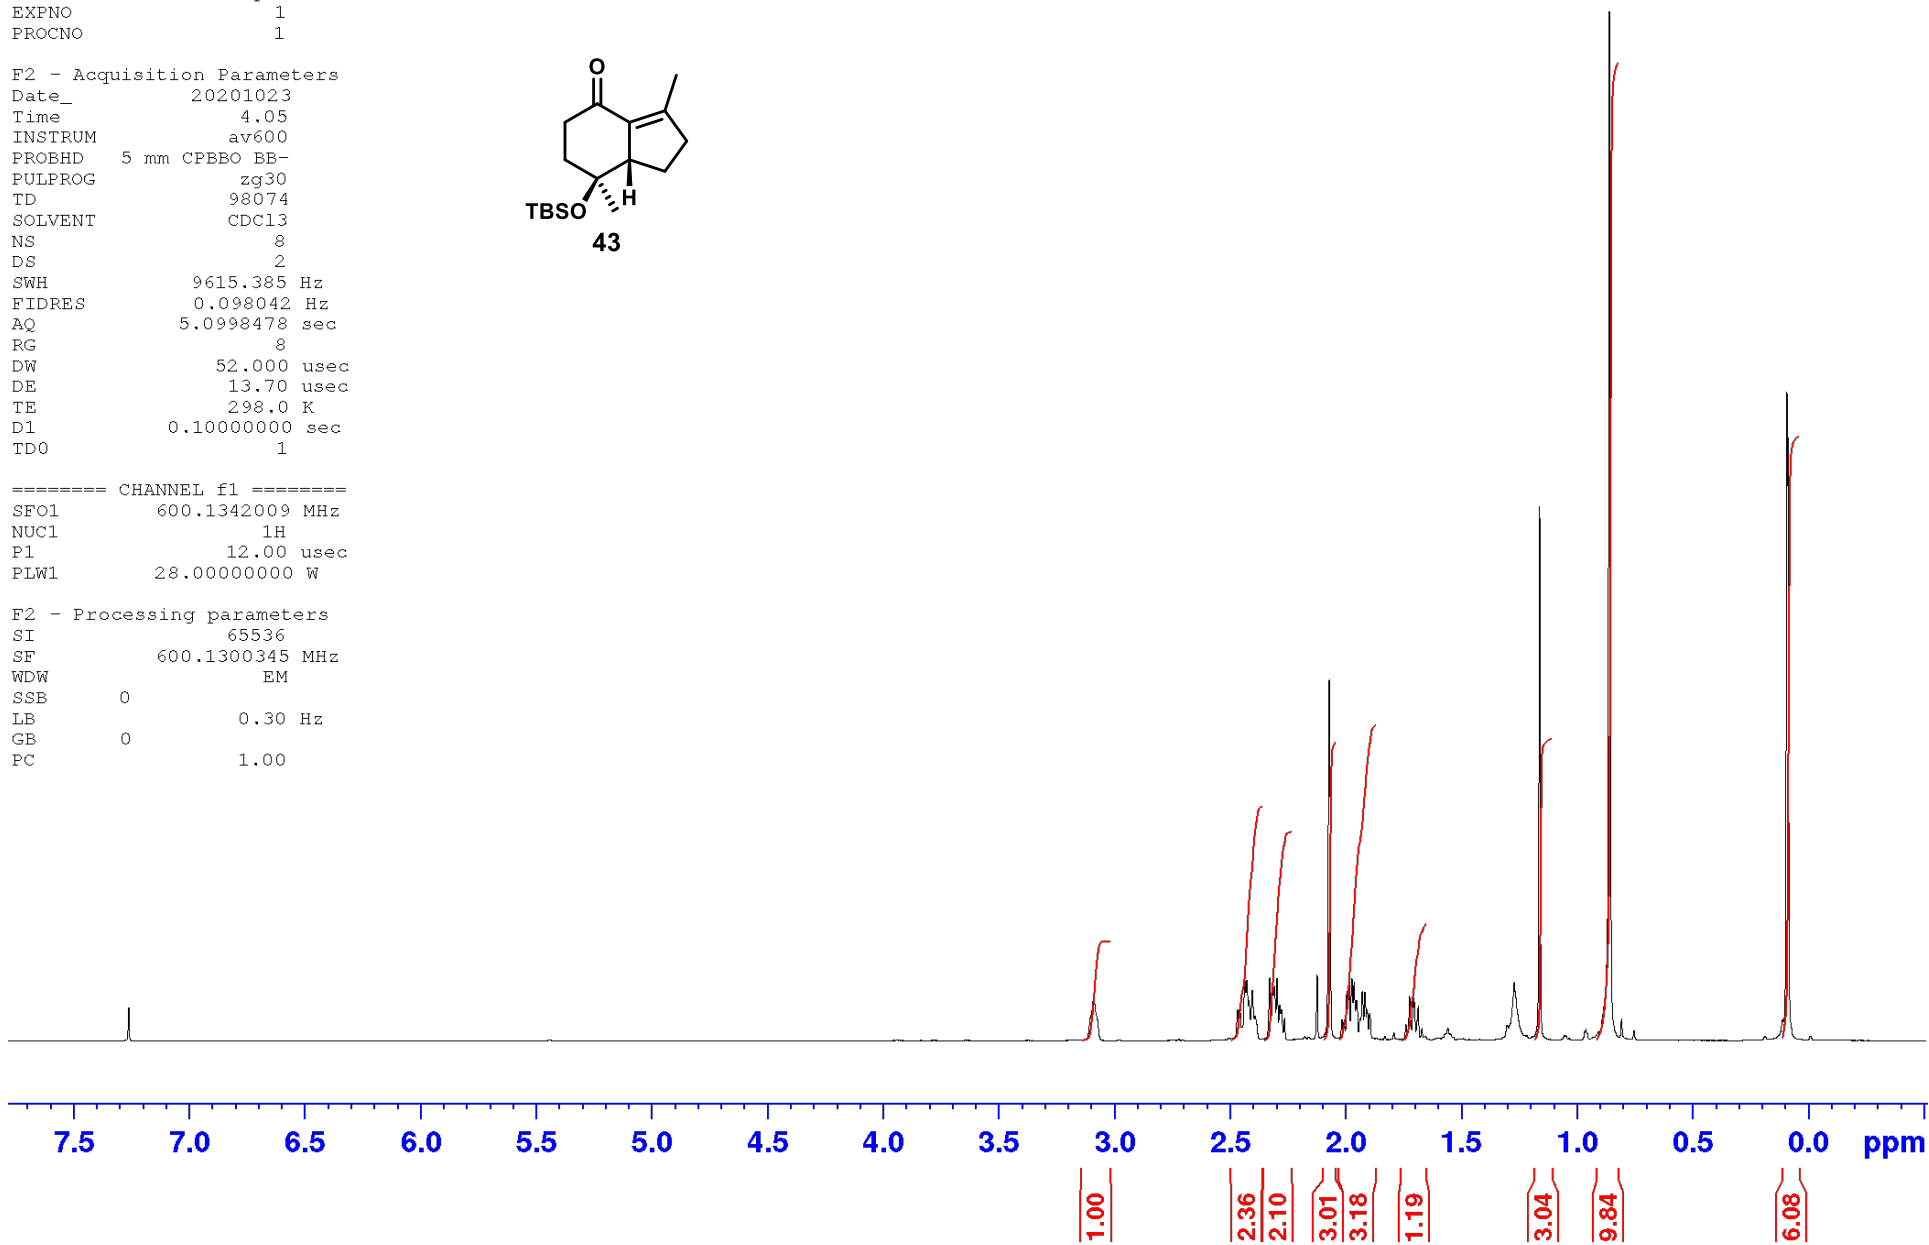

Current Data Parameters  
 NAME JC 3-225 top col  
 EXPNO 2  
 PROCNO 1

F2 - Acquisition Parameters  
 Date\_ 20201023  
 Time 4.09  
 INSTRUM av600  
 PROBHD 5 mm CPBBO BB-  
 PULPROG zgpg30  
 TD 65536  
 SOLVENT CDCl3  
 NS 127  
 DS 4  
 SWH 36231.883 Hz  
 FIDRES 0.552855 Hz  
 AQ 0.9043968 sec  
 RG 2050  
 DW 13.800 usec  
 DE 19.65 usec  
 TE 298.0 K  
 D1 0.4000001 sec  
 D11 0.0300000 sec  
 TD0 1

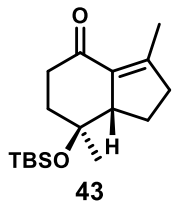

----- CHANNEL f1 -----  
 SFO1 150.9194075 MHz  
 NUC1 13C  
 P1 10.00 usec  
 PLW1 65.00000000 W

----- CHANNEL f2 -----  
 SFO2 600.1330010 MHz  
 NUC2 1H  
 CPDPRG[2] waltz16  
 PCPD2 80.00 usec  
 PLW2 28.00000000 W  
 PLW12 0.63000000 W

F2 - Processing parameters  
 SI 65536  
 SF 150.9027946 MHz  
 WDW EM  
 SSB 0  
 LB 1.00 Hz  
 GB 0  
 PC 1.00

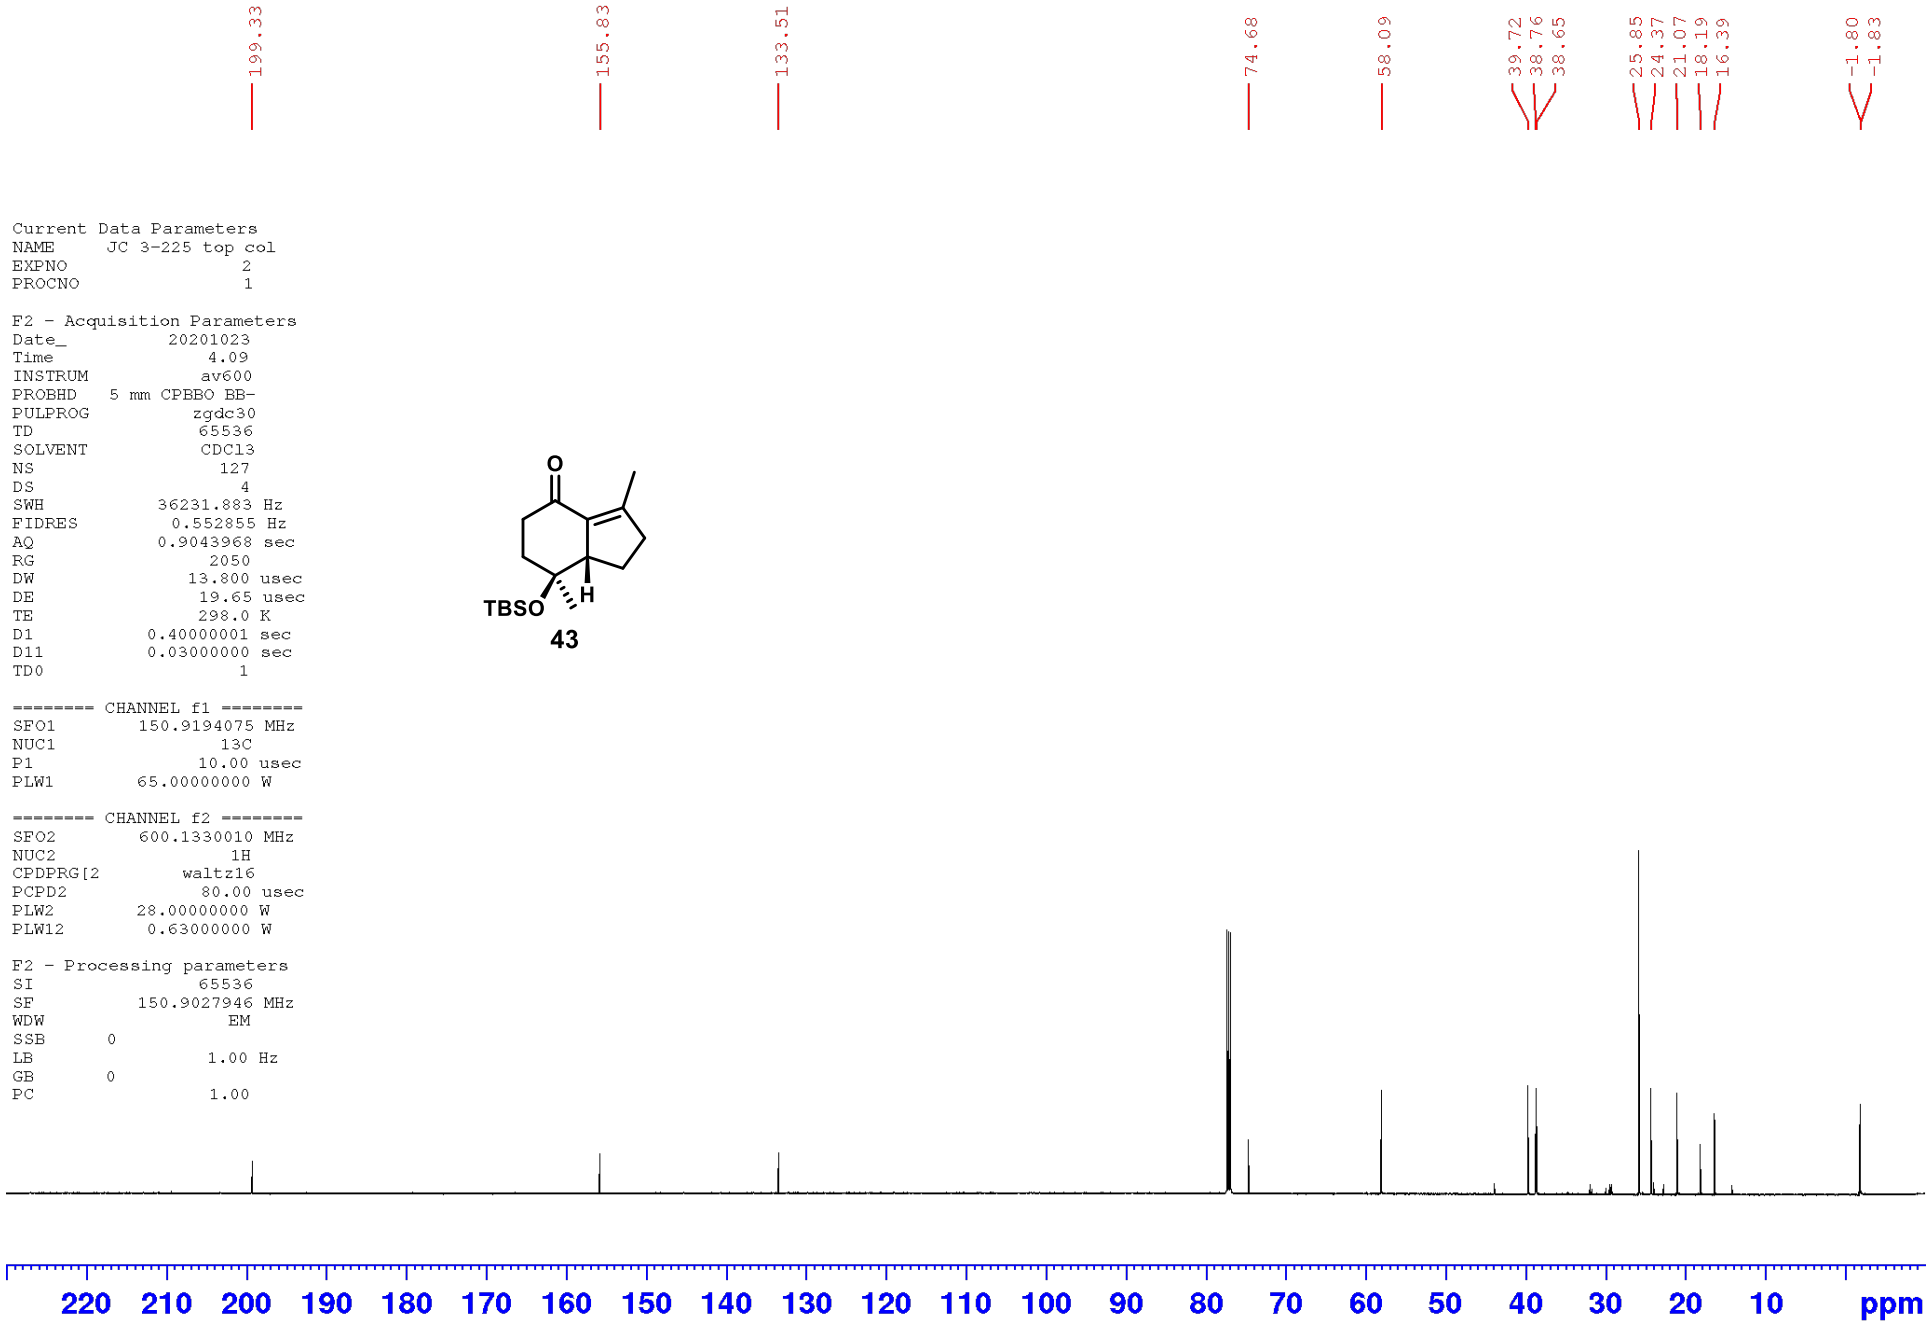

Current Data Parameters  
NAME JC 3-234 top spot  
EXPNO 1  
PROCNO 1

F2 - Acquisition Parameters  
Date\_ 20201113  
Time 22.36  
INSTRUM cryo500  
PROBHD 5 mm CPTCI 1H-  
PULPROG zg30  
TD 16022  
SOLVENT CDCl3  
NS 8  
DS 2  
SWH 8012.820 Hz  
FIDRES 0.500114 Hz  
AQ 0.9997728 sec  
RG 3.2  
DW 62.400 usec  
DE 6.00 usec  
TE 298.0 K  
D1 0.10000000 sec  
MCREST 0 sec  
MCWRK 0.01500000 sec

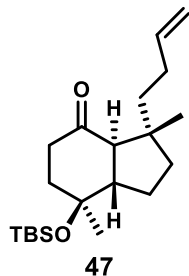

==== CHANNEL f1 =====  
NUC1 1H  
P1 7.50 usec  
PL1 1.60 dB  
SF01 500.2235015 MHz

F2 - Processing parameters  
SI 65536  
SF 500.2200312 MHz  
WDW EM  
SSB 0  
LB 0.30 Hz  
GB 0  
PC 1.00

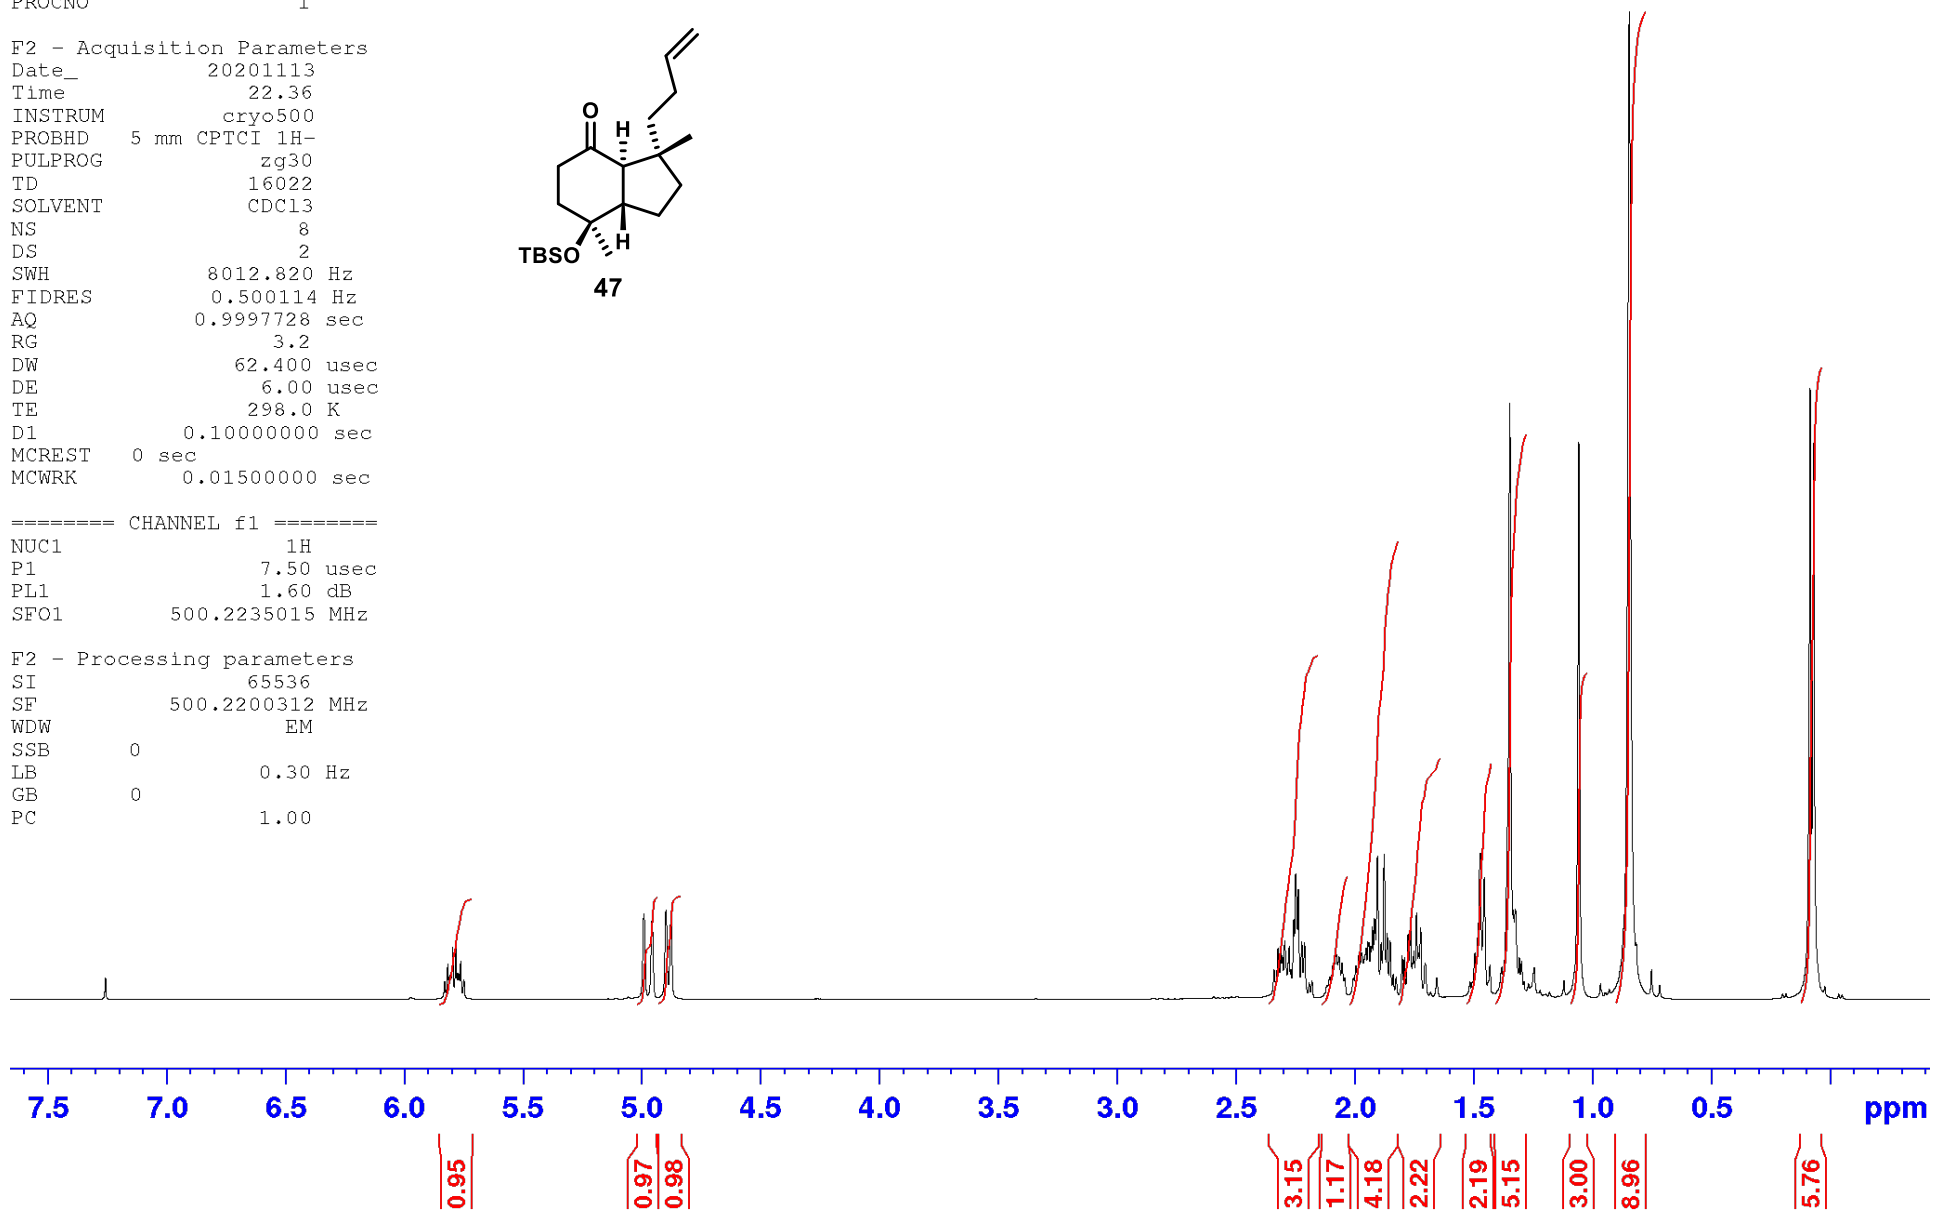

Current Data Parameters  
NAME JC 3-234 top spot  
EXPNO 2  
PROCNO 1

F2 - Acquisition Parameters  
Date\_ 20201113  
Time 22.39  
INSTRUM cryo500  
PROBHD 5 mm CPTCI 1H-  
PULPROG deptqgppp  
TD 65536  
SOLVENT cdcl3  
NS 125  
DS 8  
SWH 30303.031 Hz  
FIDRES 0.462388 Hz  
AQ 1.0813440 sec  
RG 2048  
DW 16.500 usec  
DE 6.00 usec  
TE 298.0 K  
CNST2 145.0000000  
CNST12 1.5000000  
D1 1.0000000 sec  
d2 0.00344828 sec  
d12 0.00002000 sec  
D16 0.00020000 sec  
DELTA 0.00001707 sec  
DELTA1 0.00228023 sec  
DELTA2 0.00226483 sec  
DELTA3 0.00224828 sec  
MCREST 0 sec  
MCWRK 0.01500000 sec

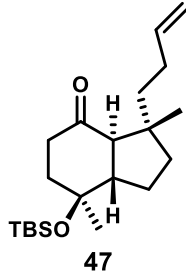

----- CHANNEL f1 -----  
NUC1 13C  
P1 16.55 usec  
P12 2000.00 usec  
PL0 120.00 dB  
PL1 -1.00 dB  
SFO1 125.7942548 MHz  
SF2 2.70 dB  
SPNAM[2] Crp60comp.4  
SPOFF2 0 Hz

----- CHANNEL f2 -----  
CPDPRG[2] waltz16  
NUC2 1H  
p0 11.55 usec  
P3 7.70 usec  
p4 15.40 usec  
PCPD2 100.00 usec  
PL2 1.60 dB  
PL12 24.50 dB  
SFO2 500.2225011 MHz

===== GRADIENT CHANNEL =====  
GPNAM[1] SINE.100  
GPNAM[2] SINE.100  
GPNAM[3] SINE.100  
GPX1 0 %  
GPX2 0 %  
GPX3 0 %  
GPY1 0 %  
GPY2 0 %  
GPY3 0 %  
GPZ1 31.00 %  
GPZ2 31.00 %  
GPZ3 31.00 %  
P16 1000.00 usec

F2 - Processing parameters  
SI 65536  
SF 125.7804078 MHz  
WDW EM  
SSB 0  
LB 1.00 Hz  
GB 0  
PC 2.00

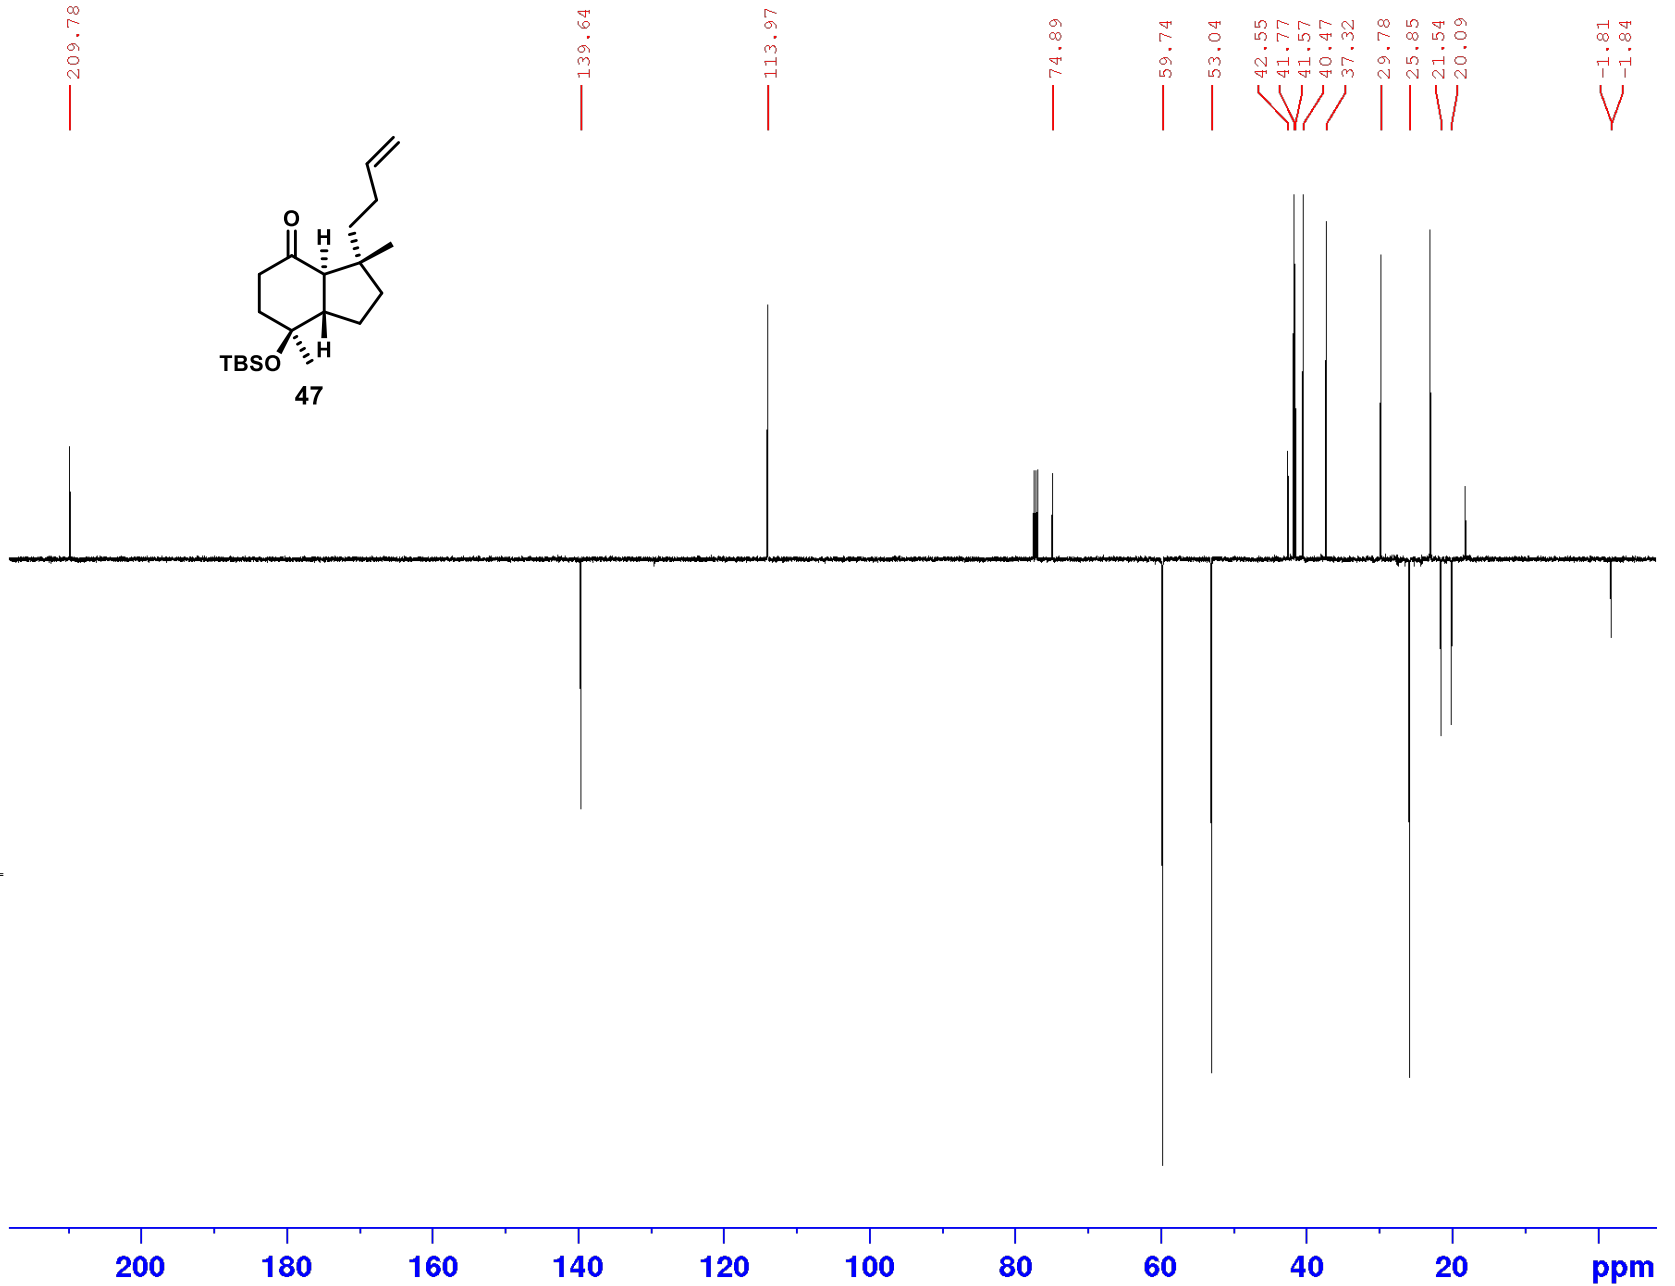

Current Data Parameters  
NAME JC 3-234 bot cis  
EXPNO 1  
PROCNO 1

F2 - Acquisition Parameters  
Date\_ 20201113  
Time 22.44  
INSTRUM cryo500  
PROBHD 5 mm CPTCI 1H-  
PULPROG zg30  
TD 16022  
SOLVENT CDCl3  
NS 8  
DS 2  
SWH 8012.820 Hz  
FIDRES 0.500114 Hz  
AQ 0.9997728 sec  
RG 4  
DW 62.400 usec  
DE 6.00 usec  
TE 298.0 K  
D1 0.10000000 sec  
MCREST 0 sec  
MCWRK 0.01500000 sec

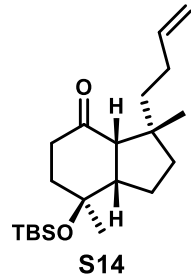

===== CHANNEL f1 =====  
NUC1 1H  
P1 7.50 usec  
PL1 1.60 dB  
SFO1 500.2235015 MHz

F2 - Processing parameters  
SI 65536  
SF 500.2200312 MHz  
WDW EM  
SSB 0  
LB 0.30 Hz  
GB 0  
PC 2.00

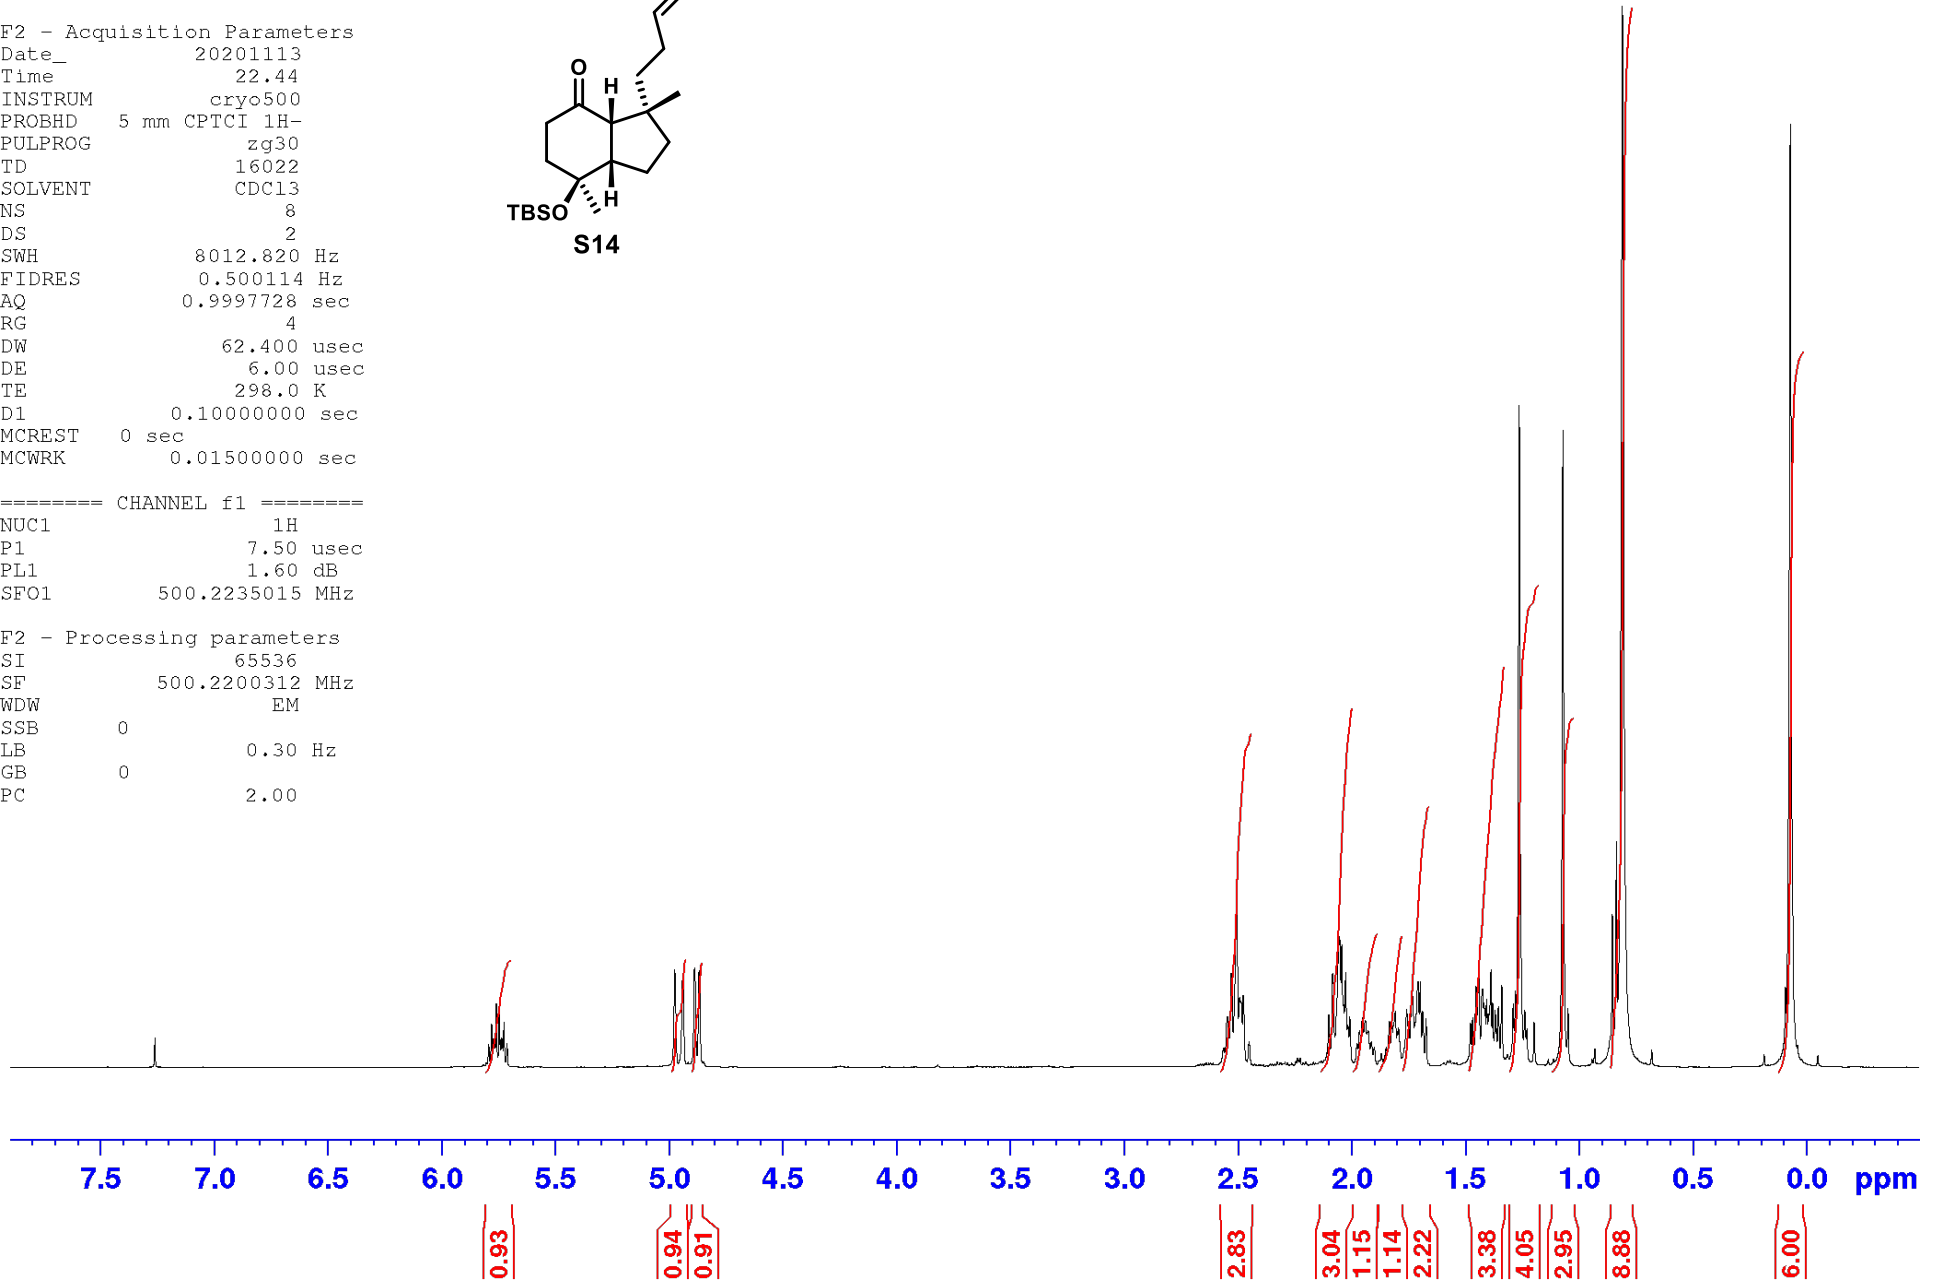



Current Data Parameters  
NAME JC 3-234 bot cis  
EXPNO 2  
PROCNO 1

F2 - Acquisition Parameters  
Date\_ 20201113  
Time 22.45  
INSTRUM crys500  
PROBHD 5 mm CPTCI LH-  
PULPROG deptqppsp  
TD 65536  
SOLVENT CDCl3  
NS 24  
DS 8  
SWH 30303.031 Hz  
FIDRES 0.462388 Hz  
AQ 1.0813440 sec  
RG 4096  
DW 16.500 usec  
DE 6.00 usec  
TE 298.0 K  
CNST2 145.0000000  
CNST12 1.5000000  
D1 1.00000000 sec  
d2 0.00344828 sec  
d12 0.00002000 sec  
D16 0.00020000 sec  
DELTA 0.00001707 sec  
DELTA1 0.00228023 sec  
DELTA2 0.00226483 sec  
DELTA3 0.00224828 sec  
MCREST 0 sec  
MCNRK 0.01500000 sec

===== CHANNEL f1 =====  
NUC1 13C  
P1 16.55 usec  
P12 2000.00 usec  
PL0 120.00 dB  
PL1 -1.00 dB  
SF01 125.7942548 MHz  
SF2 2.70 dB  
SFOFF2 0 Hz

===== CHANNEL f2 =====  
CPDPRG2 waltz16  
NUC2 1H  
p0 11.55 usec  
P3 7.70 usec  
p4 15.40 usec  
PCPD2 100.00 usec  
PL2 1.60 dB  
PL12 24.50 dB  
SFO2 500.2225011 MHz

===== GRADIENT CHANNEL =====  
GPNAM[1] SINE.100  
GPNAM[2] SINE.100  
GPNAM[3] SINE.100  
GPX1 0 %  
GPX2 0 %  
GPX3 0 %  
GPY1 0 %  
GPY2 0 %  
GPY3 0 %  
GPZ1 31.00 %  
GPZ2 31.00 %  
GPZ3 31.00 %  
P16 1000.00 usec

F2 - Processing parameters  
SI 65536  
SF 125.7804090 MHz  
WDW EM  
SSB 0  
LB 1.00 Hz  
GB 0  
PC 2.00

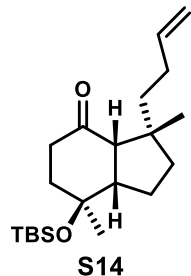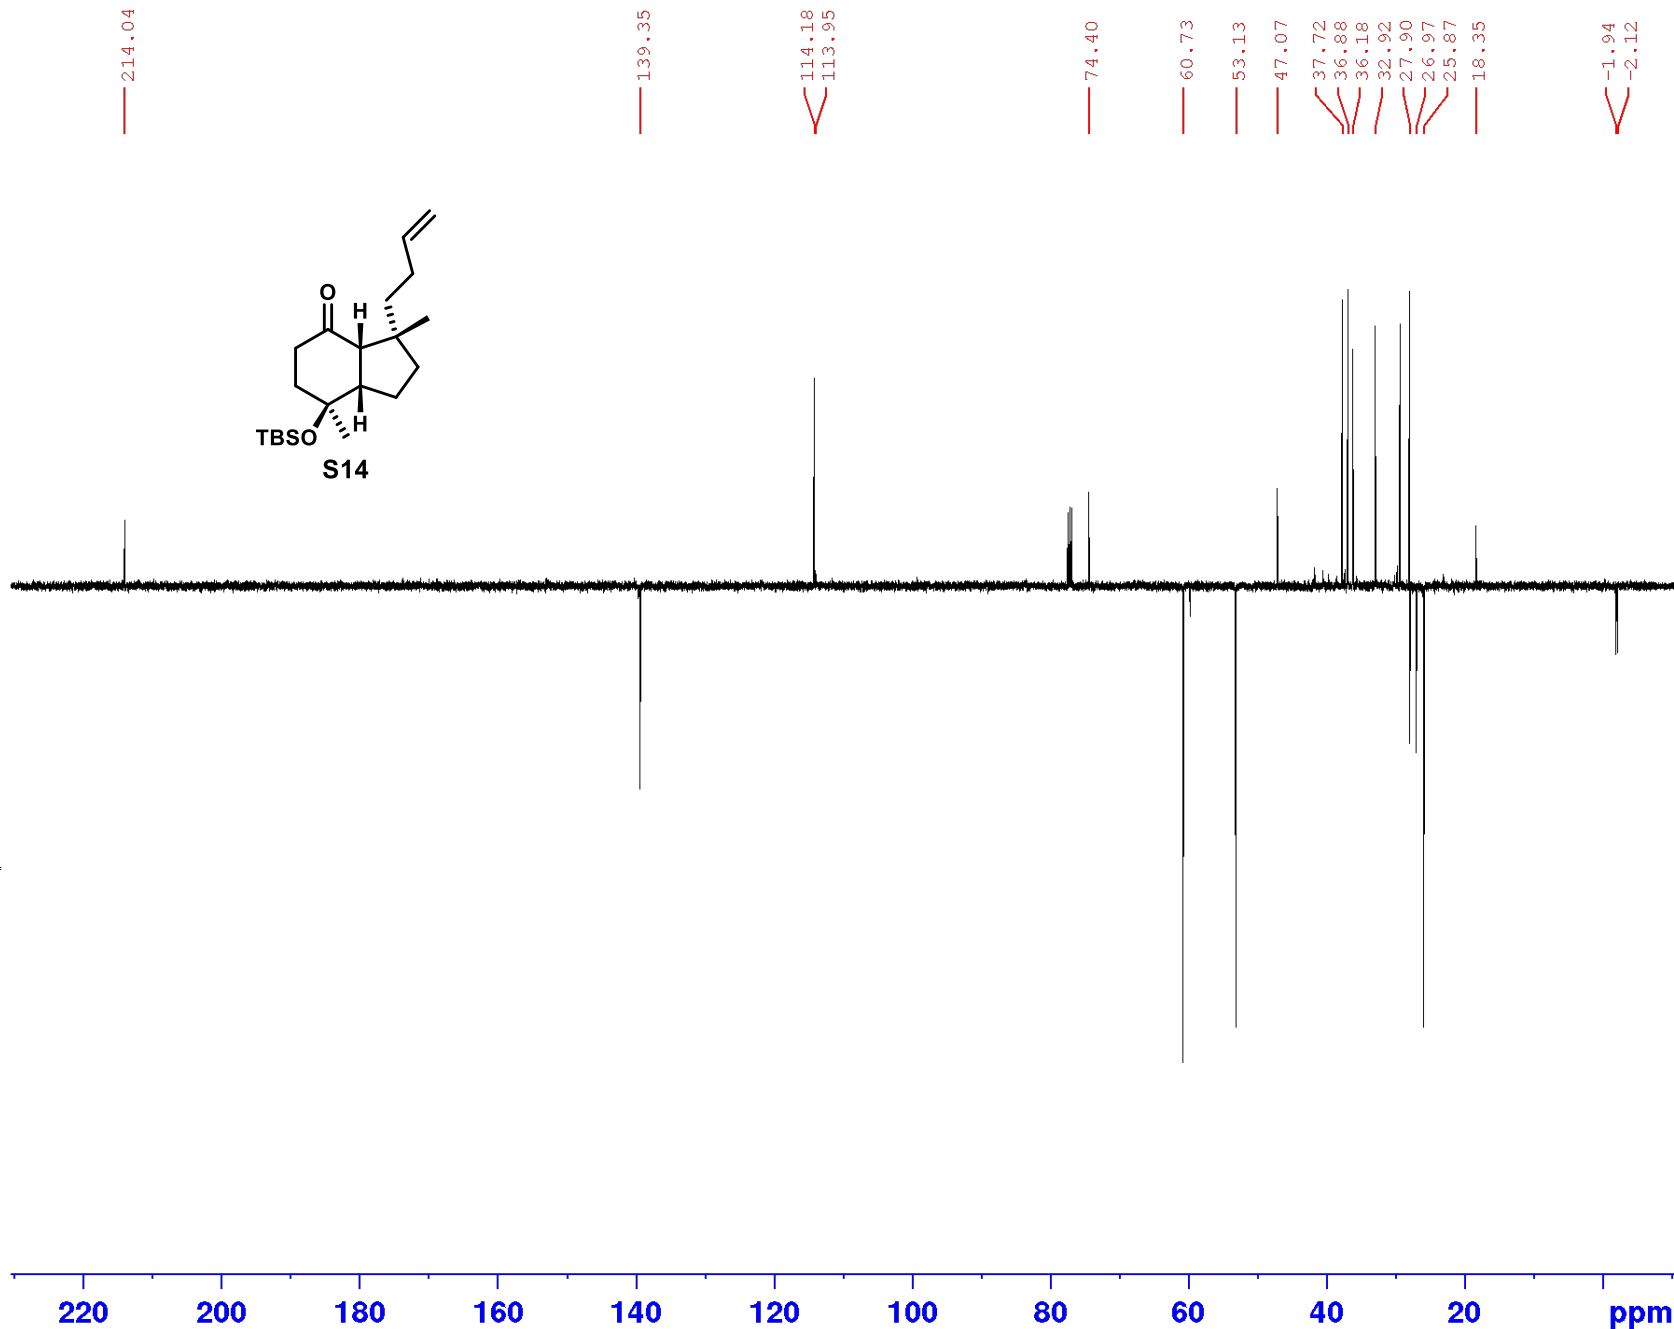

Current Data Parameters  
NAME JC 3-242 FRAC 6 col  
EXPNO 2  
PROCNO 1

F2 - Acquisition Parameters  
Date\_ 20201215  
Time 0.47  
INSTRUM cryo500  
PROBHD 5 mm CPTCI 1H-  
PULPROG zg30  
TD 16022  
SOLVENT CDCl3  
NS 8  
DS 2  
SWH 8012.820 Hz  
FIDRES 0.500114 Hz  
AQ 0.9997728 sec  
RG 8  
DW 62.400 usec  
DE 6.00 usec  
TE 298.0 K  
D1 0.10000000 sec  
MCREST 0 sec  
MCWRK 0.01500000 sec

===== CHANNEL f1 =====  
NUC1 1H  
P1 9.75 usec  
PL1 1.60 dB  
SFO1 500.2235015 MHz

F2 - Processing parameters  
SI 65536  
SF 500.2200314 MHz  
WDW EM  
SSB 0  
LB 0.30 Hz  
GB 0  
PC 2.00

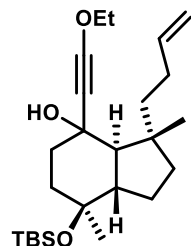

**48**, less polar diastereomer

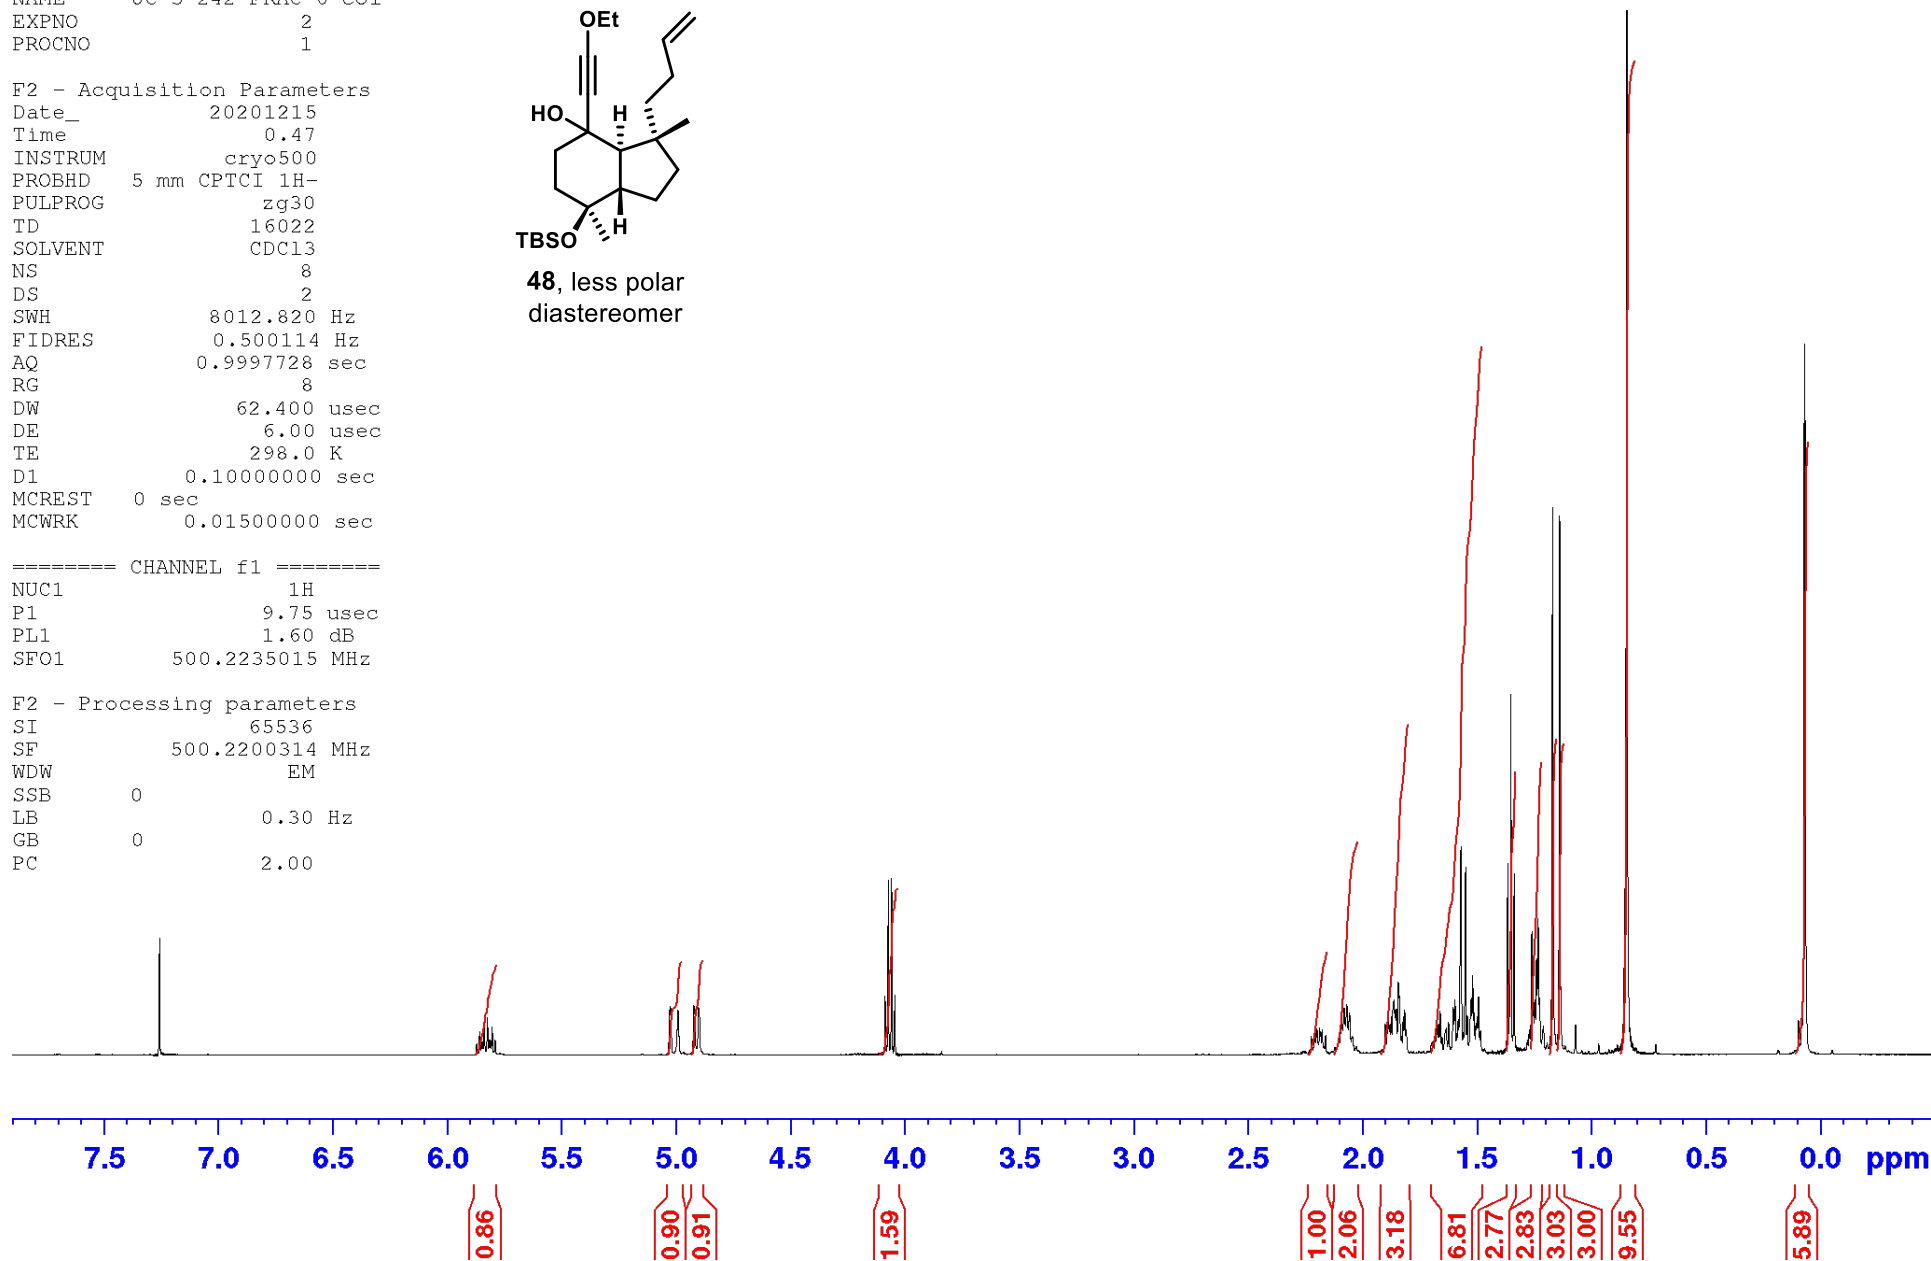

Current Data Parameters  
NAME JC 3-242 FRAC 6 col  
EXPNO 3  
PROCNO 1

F2 - Acquisition Parameters  
Date\_ 20201215  
Time 0.48  
INSTRUM cryo500  
PROBHD 5 mm CPTCI 1H-  
PULPROG SpinEchopg30gp2.prd  
TD 65536  
SOLVENT CDCl3  
NS 68  
DS 16  
SWH 30303.031 Hz  
FIDRES 0.462388 Hz  
AQ 1.0013440 sec  
RG 7298.2  
DW 16.500 usec  
DE 6.00 usec  
TE 298.0 K  
D1 0.25000000 sec  
d11 0.03000000 sec  
D16 0.00020000 sec  
d17 0.00019600 sec  
MCREST 0 sec  
MCWRK 0.01500000 sec  
F2 37.70 usec

===== CHANNEL f1 =====  
NUC1 13C  
P1 18.85 usec  
P12 2000.00 usec  
F20 500.00 usec  
PL0 120.00 dB  
PL1 -1.00 dB  
SFO1 125.7942548 MHz  
SP2 1.55 dB  
SP4 1.55 dB  
SPNAM[2] Crp60comp.4  
SPNAM[4] Crp60,0.5,20.1  
SPOPF2 0 Hz  
SPOPF4 0 Hz

===== CHANNEL f2 =====  
CFDPRG[2] waltz16  
NUC2 1H  
PCPD2 100.00 usec  
PL2 1.60 dB  
PL12 22.00 dB  
SFO2 500.2225011 MHz

===== GRADIENT CHANNEL =====  
GFNAM[1] SINE.100  
GFNAM[2] SINE.100  
GFX1 0 %  
GFX2 0 %  
GFY1 0 %  
GFY2 0 %  
GFZ1 30.00 %  
GFZ2 50.00 %  
p15 500.00 usec  
p16 1000.00 usec

F2 - Processing parameters  
SI 65536  
SF 125.7804058 MHz  
WDW EM  
SSB 0  
LB 1.00 Hz  
GB

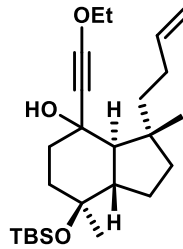

48, less polar diastereomer

140.00  
113.82  
93.39  
75.94  
74.34  
67.63  
56.42  
48.53  
43.62  
42.94  
42.49  
42.41  
38.11  
37.77  
29.71  
25.97  
24.55  
22.92  
20.33  
18.26  
14.66  
-1.71  
-1.75

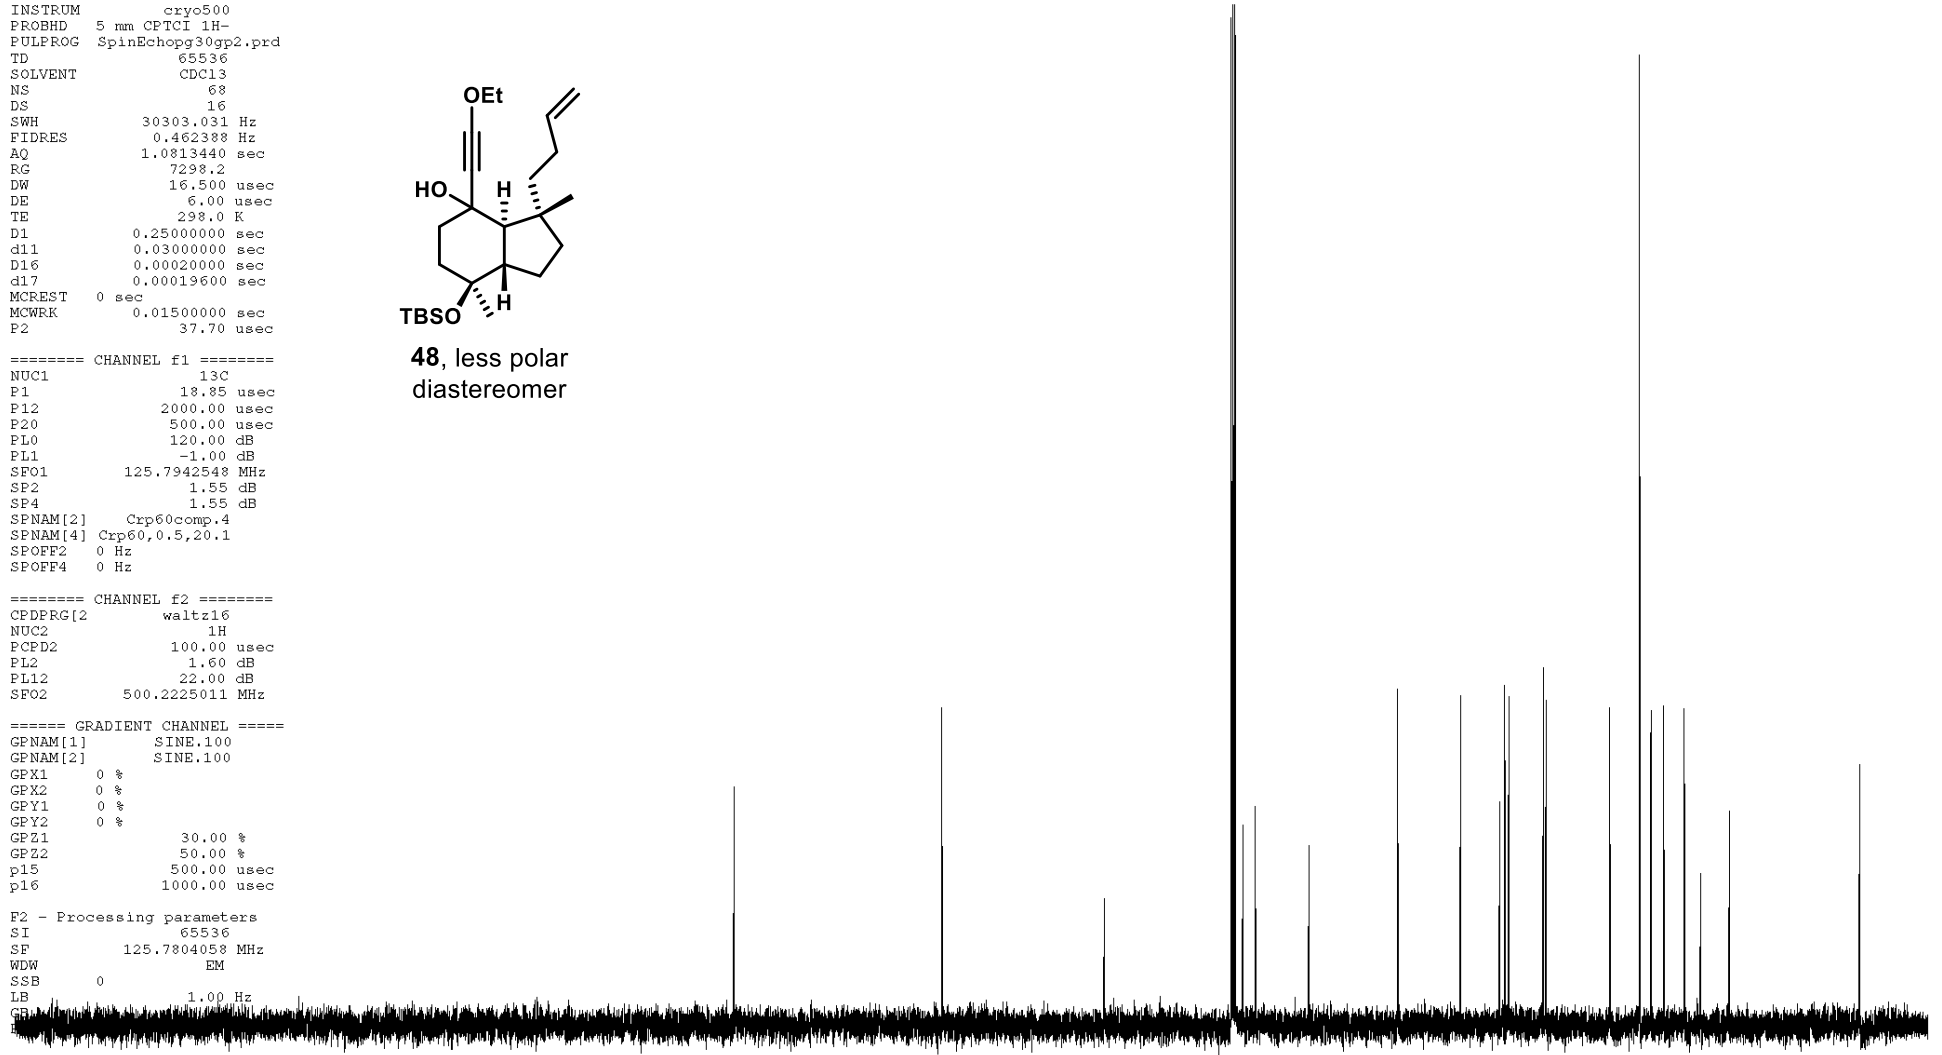

220 210 200 190 180 170 160 150 140 130 120 110 100 90 80 70 60 50 40 30 20 10 ppm

Current Data Parameters  
NAME JC 3-242 FRAC 12 col  
EXPNO 1  
PROCNO 1

F2 - Acquisition Parameters  
Date\_ 20201215  
Time 0.54  
INSTRUM cryo500  
PROBHD 5 mm CPTCI 1H-  
PULPROG zg30  
TD 16022  
SOLVENT CDC13  
NS 8  
DS 2  
SWH 8012.820 Hz  
FIDRES 0.500114 Hz  
AQ 0.9997728 sec  
RG 5.7  
DW 62.400 usec  
DE 6.00 usec  
TE 298.0 K  
D1 0.1000000 sec  
MCREST 0 sec  
MCWRK 0.0150000 sec

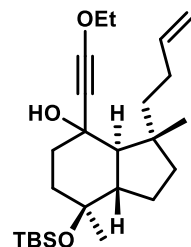

**48**, more polar diastereomer

==== CHANNEL f1 =====  
NUC1 1H  
P1 9.75 usec  
PL1 1.60 dB  
SFO1 500.2235015 MHz

F2 - Processing parameters  
SI 65536  
SF 500.2200314 MHz  
WDW EM  
SSB 0  
LB 0.30 Hz  
GB 0  
PC 2.00

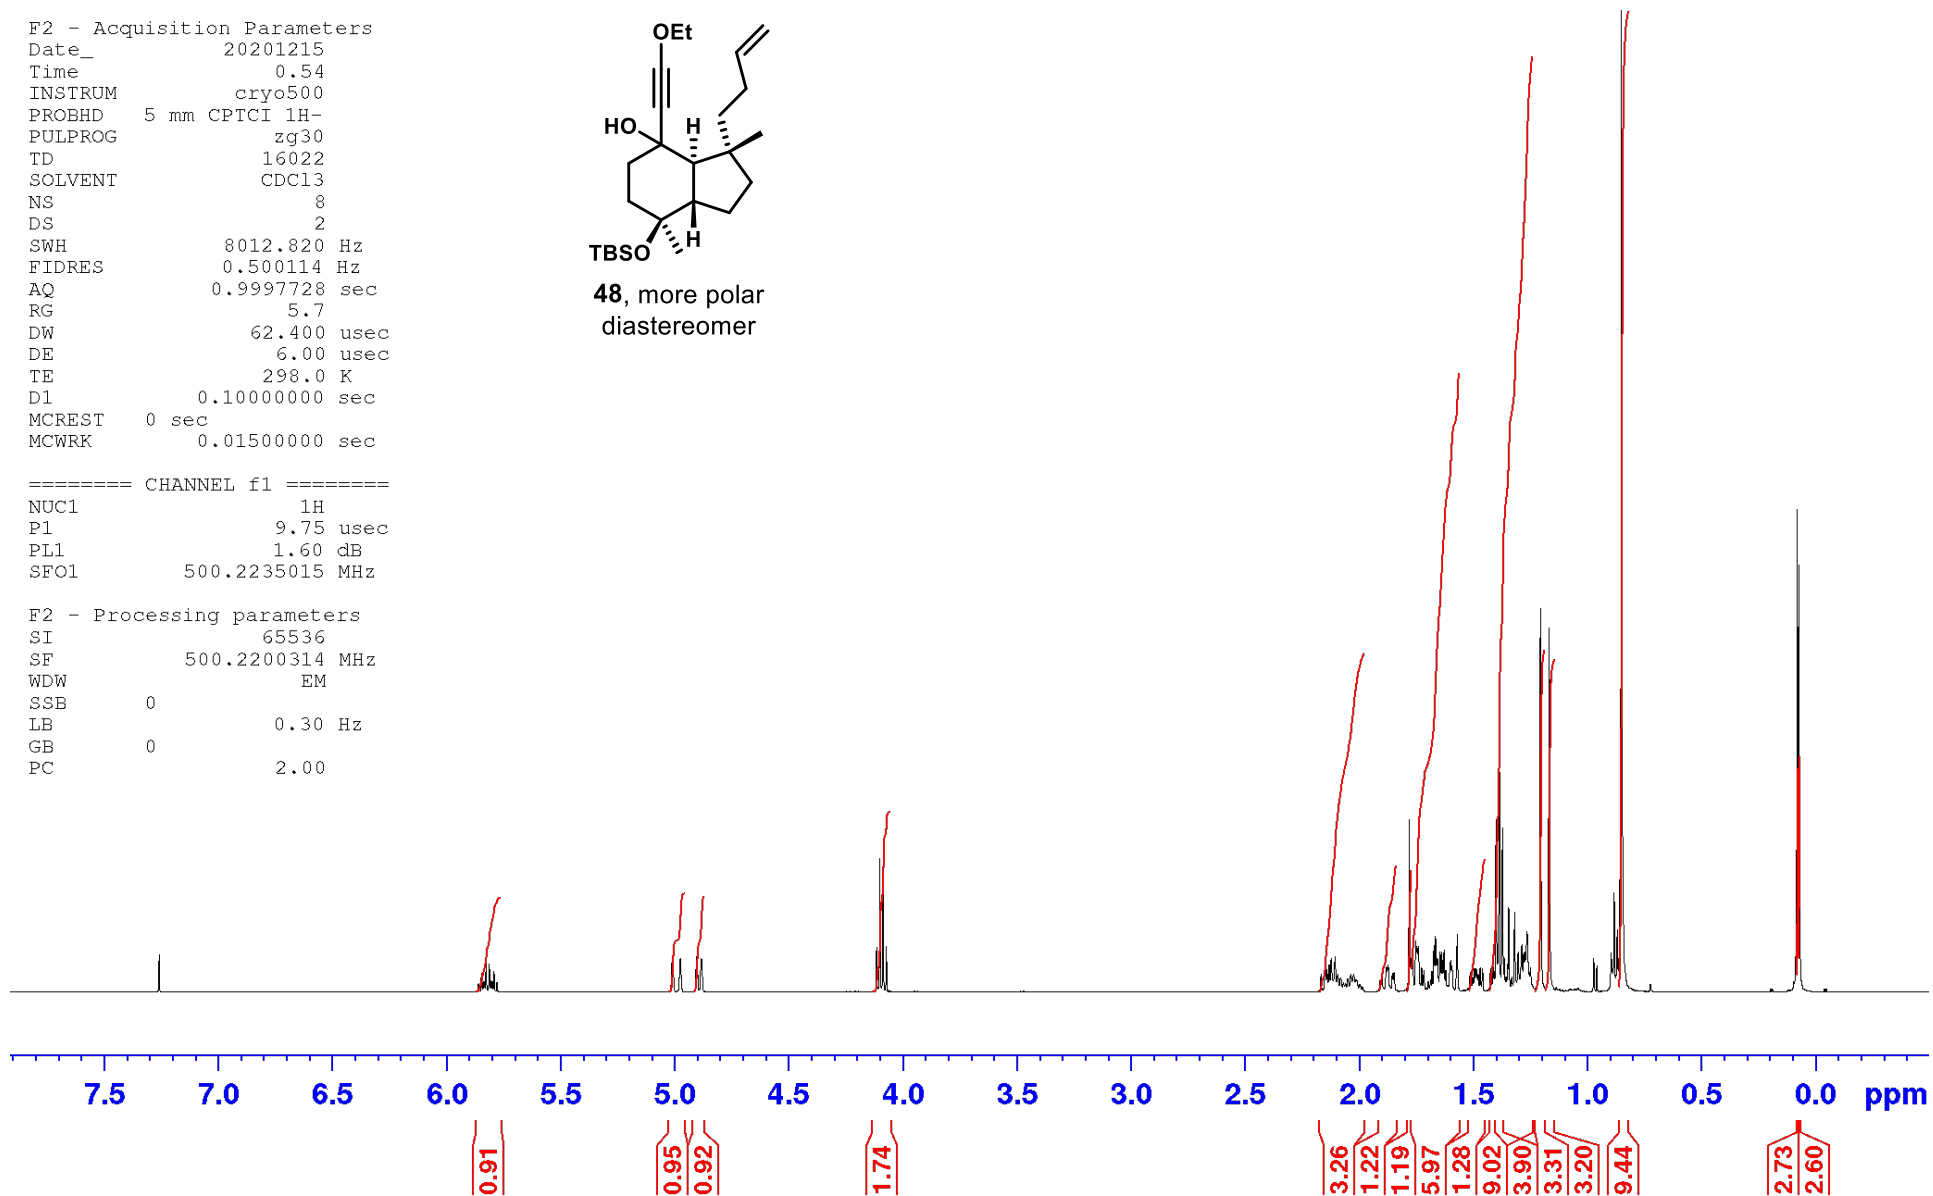

Current Data Parameters  
NAME JC 3-242 FRAC 12 col  
EXPNO 2  
PROCNO 1

F2 - Acquisition Parameters  
Date\_ 20201215  
Time\_ 0.56  
INSTRUM cryo500  
PROBHD 5 mm CPTCI 1H-  
PULPROG SpinEcho30gp2.prd  
TD 65536  
SOLVENT CDCl3  
NS 105  
DS 16  
SMH 30303.031 Hz  
FIDRES 0.462388 Hz  
AQ 1.0813440 sec  
RG 16384  
DW 16.500 usec  
DE 6.00 usec  
TE 298.0 K  
D1 0.25000000 sec  
d11 0.03000000 sec  
D16 0.00020000 sec  
d17 0.00019600 sec  
MORST 0 sec  
MCWRK 0.01500000 sec  
F2 37.70 usec

===== CHANNEL f1 =====  
NUC1 13C  
P1 18.85 usec  
P12 2000.00 usec  
P20 500.00 usec  
PL0 120.00 dB  
PL1 -1.00 dB  
SFO1 125.7942548 MHz  
SP2 1.55 dB  
SP4 1.55 dB  
SPNAM[2] Crp60comp-4  
SPNAM[4] Crp60,0.5,20.1  
SPOFF2 0 Hz  
SPOFF4 0 Hz

===== CHANNEL f2 =====  
CPDPRG[2] waltz16  
NUC2 1H  
PCPD2 100.00 usec  
PL2 1.60 dB  
FL12 22.00 dB  
SFO2 500.2225011 MHz

===== GRADIENT CHANNEL =====  
GPNAM[1] SINE.100  
GPNAM[2] SINE.100  
GPX1 0 %  
GPX2 0 %  
GPY1 0 %  
GPY2 0 %  
GPZ1 30.00 %  
GPZ2 50.00 %  
p15 500.00 usec  
p16 1000.00 usec

F2 - Processing parameters  
SI 65536  
SF 125.7804062 MHz  
MDW EM  
SSB 0  
LB 1.00 Hz  
GB 0  
PC 2.00

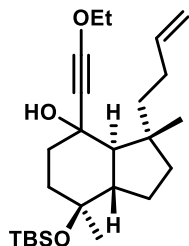

48, more polar diastereomer

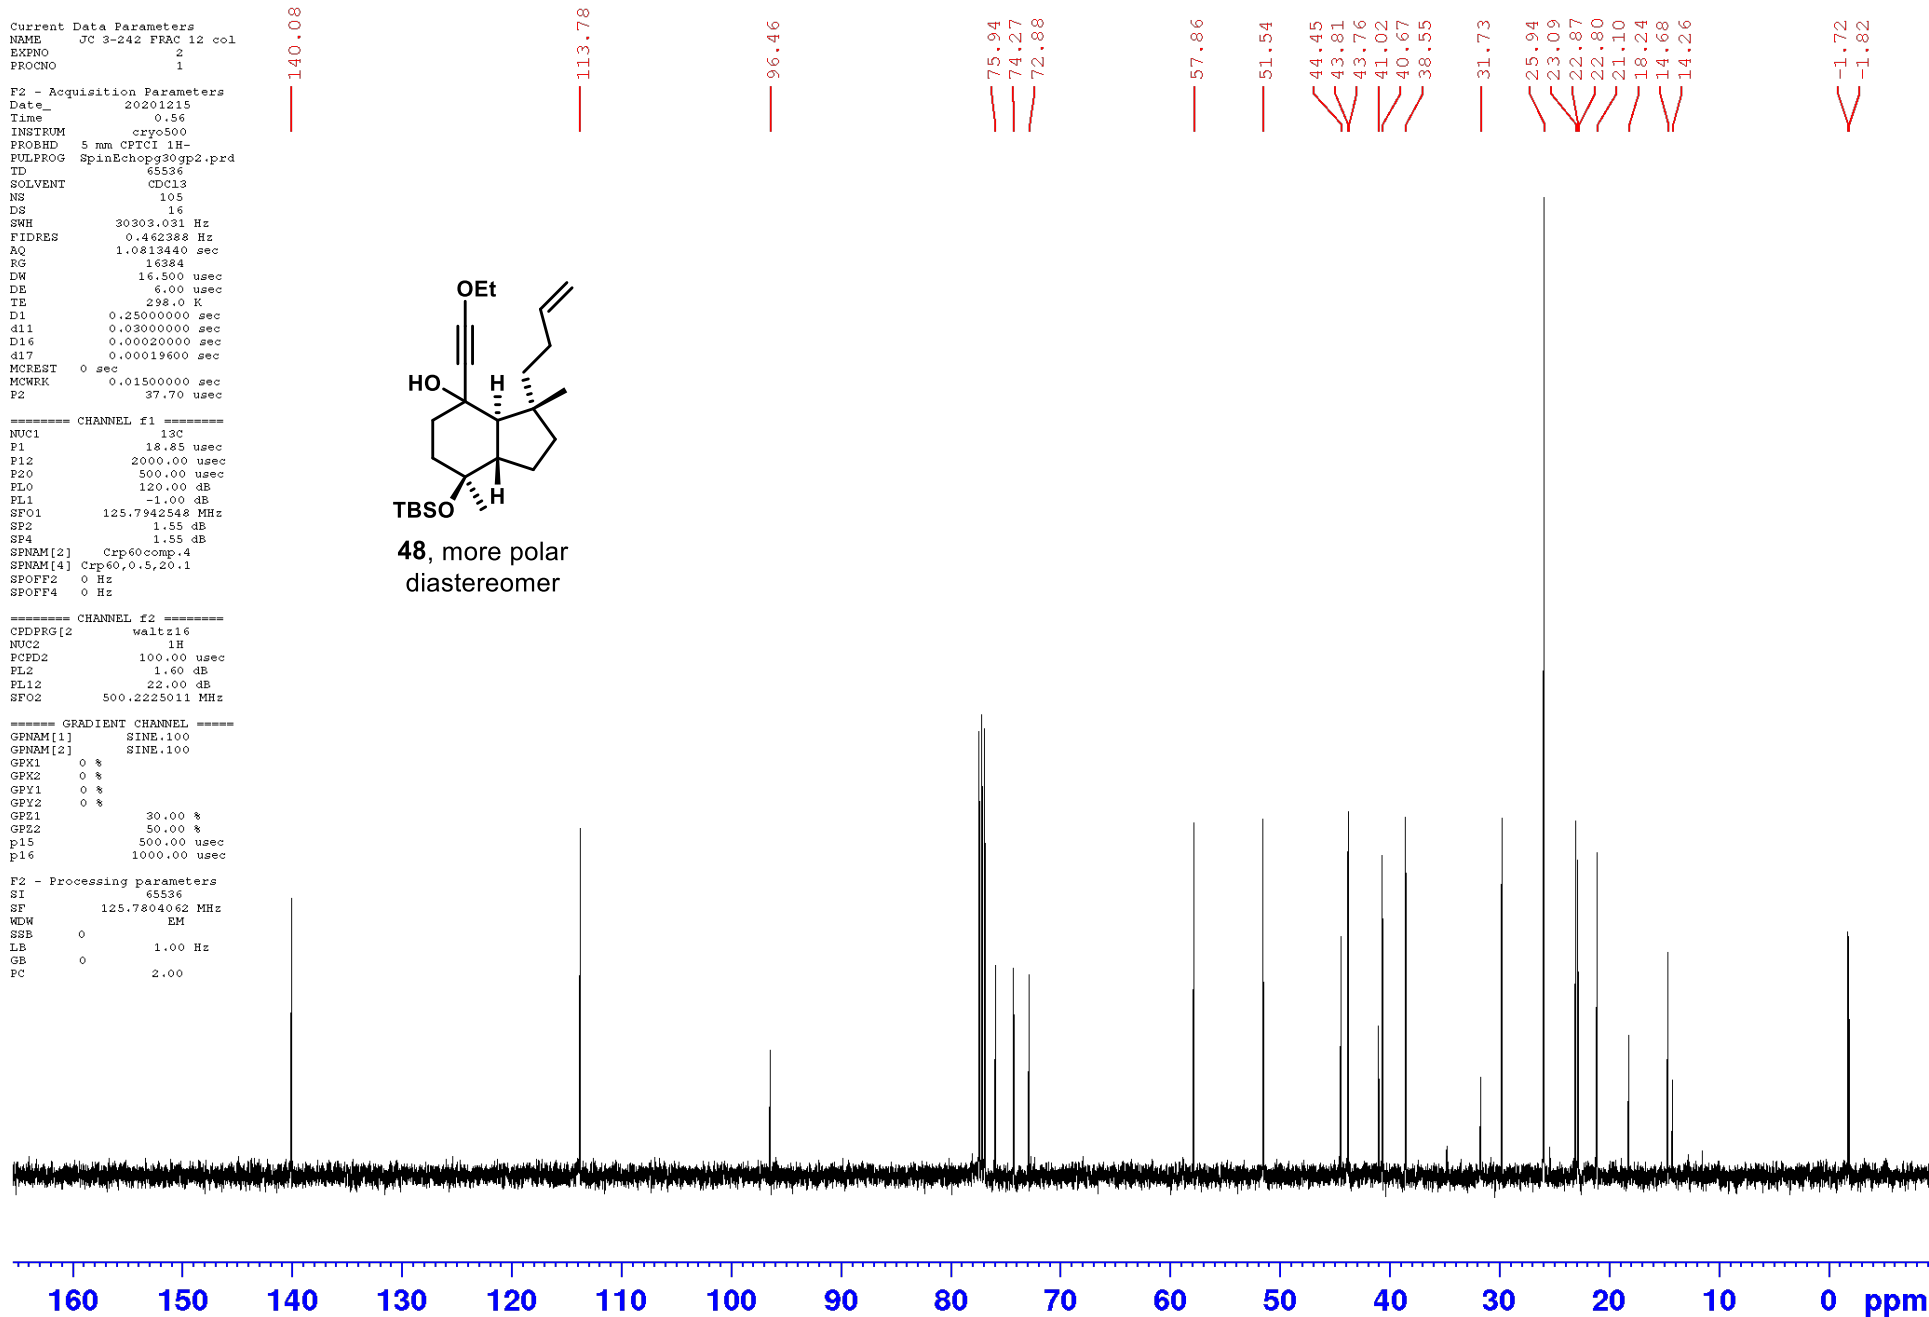

Current Data Parameters  
 NAME JSCIV-125-f10-11-3  
 EXPNO 1  
 PROCNO 1

F2 - Acquisition Parameters  
 Date\_ 20220523  
 Time 13.09  
 INSTRUM av600  
 PROBHD 5 mm CPBBO BB-  
 PULPROG zg30  
 TD 98074  
 SOLVENT CDC13  
 NS 8  
 DS 2  
 SWH 9615.385 Hz  
 FIDRES 0.098042 Hz  
 AQ 5.0998478 sec  
 RG 10  
 DW 52.000 usec  
 DE 14.23 usec  
 TE 298.0 K  
 D1 0.10000000 sec  
 TD0 1

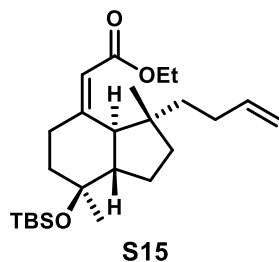

==== CHANNEL f1 =====  
 SFO1 600.134209 MHz  
 NUC1 1H  
 P1 9.50 usec  
 PLW1 30.00000000 W  
 F2 - Processing parameters  
 SI 65536  
 SF 600.1300348 MHz  
 WDW EM  
 SSB 0  
 LB 0.30 Hz  
 GB 0  
 PC 1.00

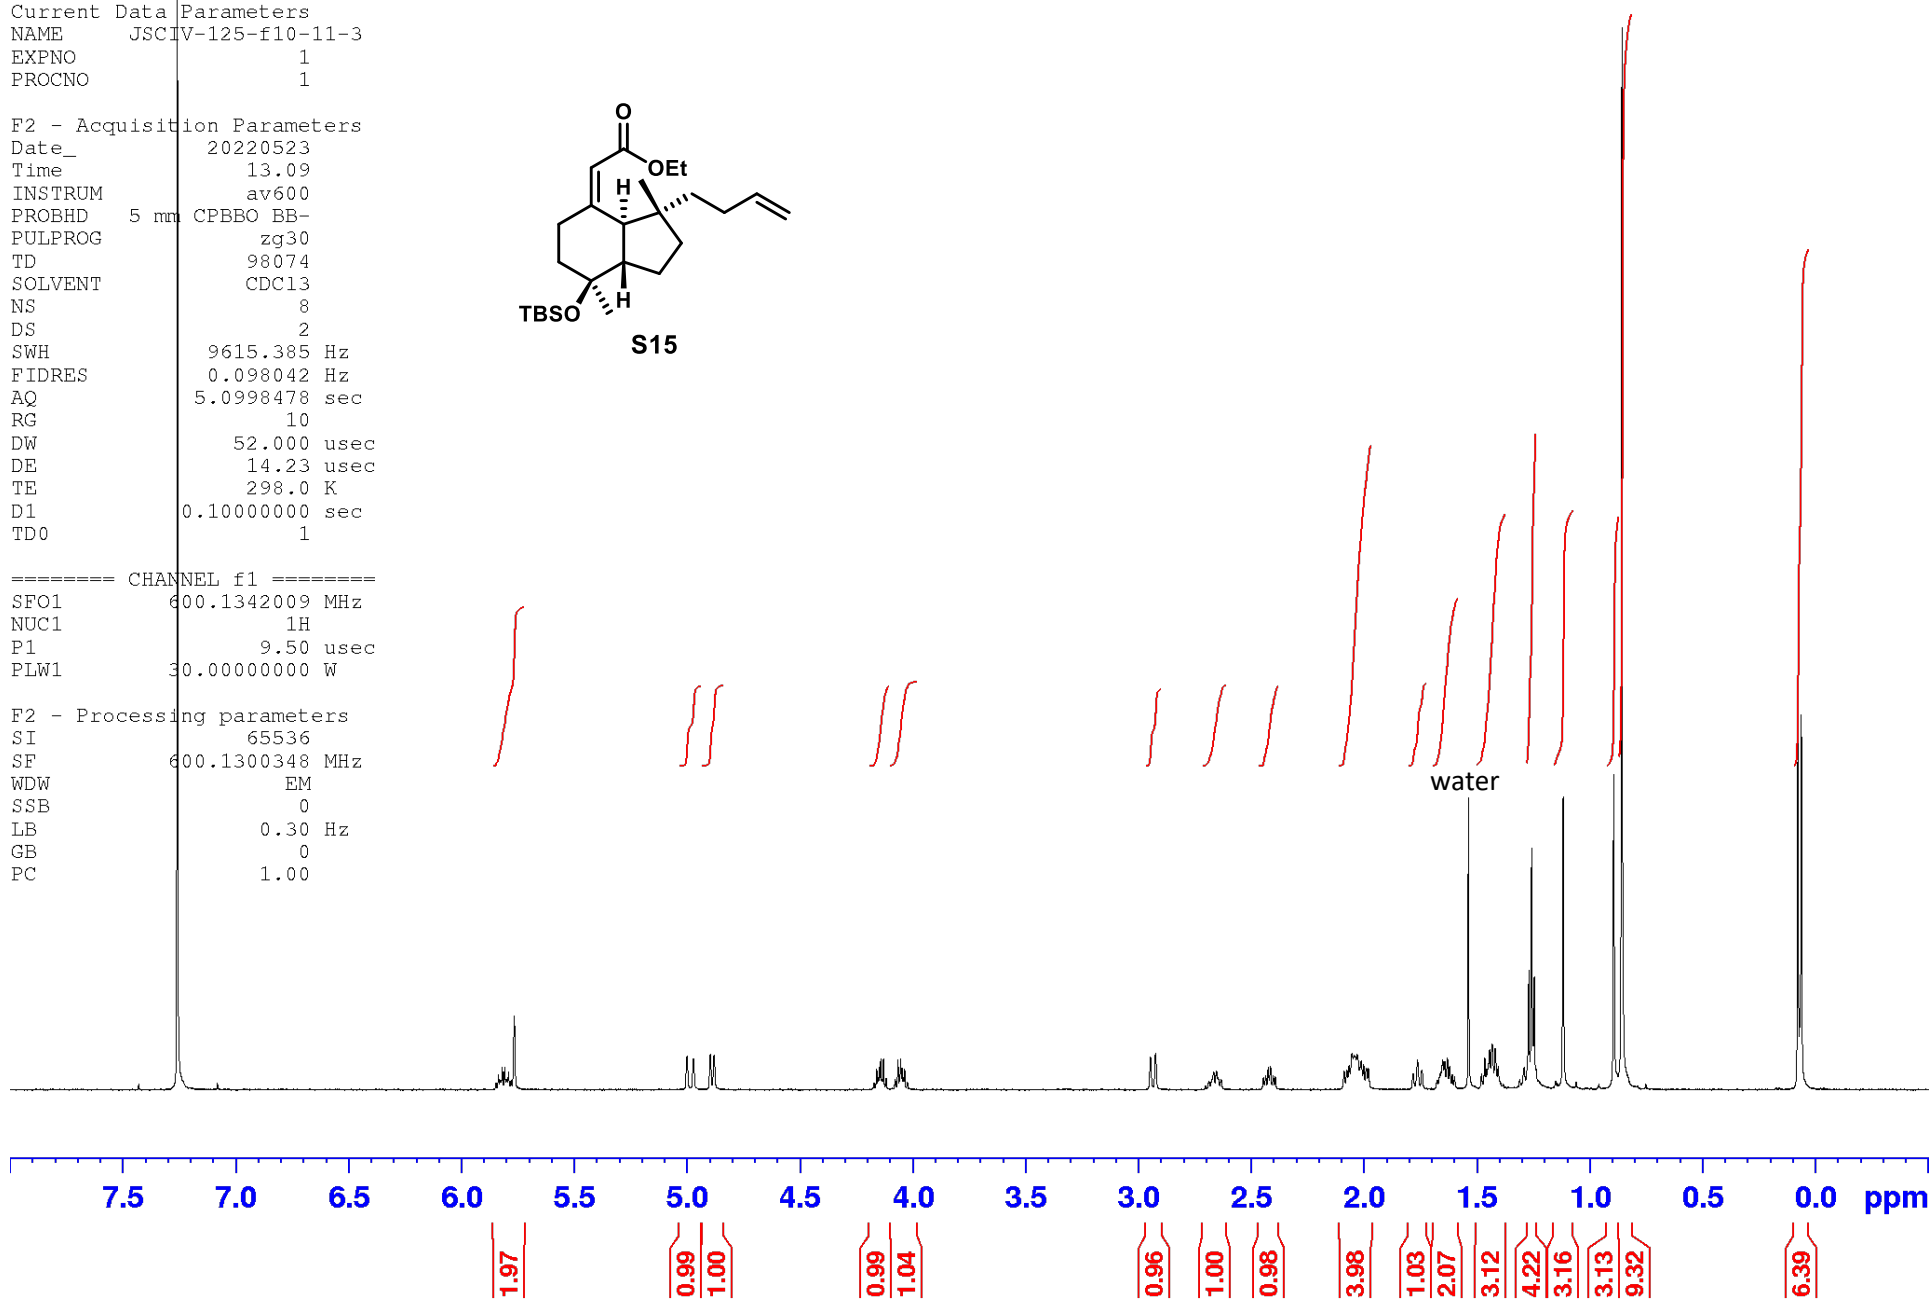

Current Data Parameters  
NAME JSCIV-125-f10-11-3  
EXPNO 2  
PROCNO 1

F2 - Acquisition Parameters  
Date\_ 20220523  
Time 13.13  
INSTRUM av600  
PROBHD 5 mm CPBBO BB-  
PULPROG zgdc30  
TD 65536  
SOLVENT CDC13  
NS 292  
DS 4  
SWH 36231.883 Hz  
FIDRES 0.552855 Hz  
AQ 0.9043968 sec  
RG 2050  
DW 13.800 usec  
DE 19.63 usec  
TE 298.0 K  
D1 0.40000001 sec  
D11 0.03000000 sec  
TD0 1

==== CHANNEL f1 =====  
SFO1 150.9194080 MHz  
NUC1 13C  
P1 10.10 usec  
PLW1 64.00000000 W

==== CHANNEL f2 =====  
SFO2 600.1330010 MHz  
NUC2 1H  
CPDPRG[2] waltz16  
PCPD2 80.00 usec  
PLW2 30.00000000 W  
PLW12 0.37154001 W

F2 - Processing parameters  
SI 65536  
SF 150.9027930 MHz  
WDW EM  
SSB 0  
LB 1.00 Hz  
GB 0  
PC 1.00

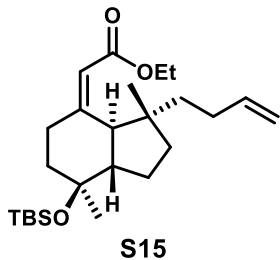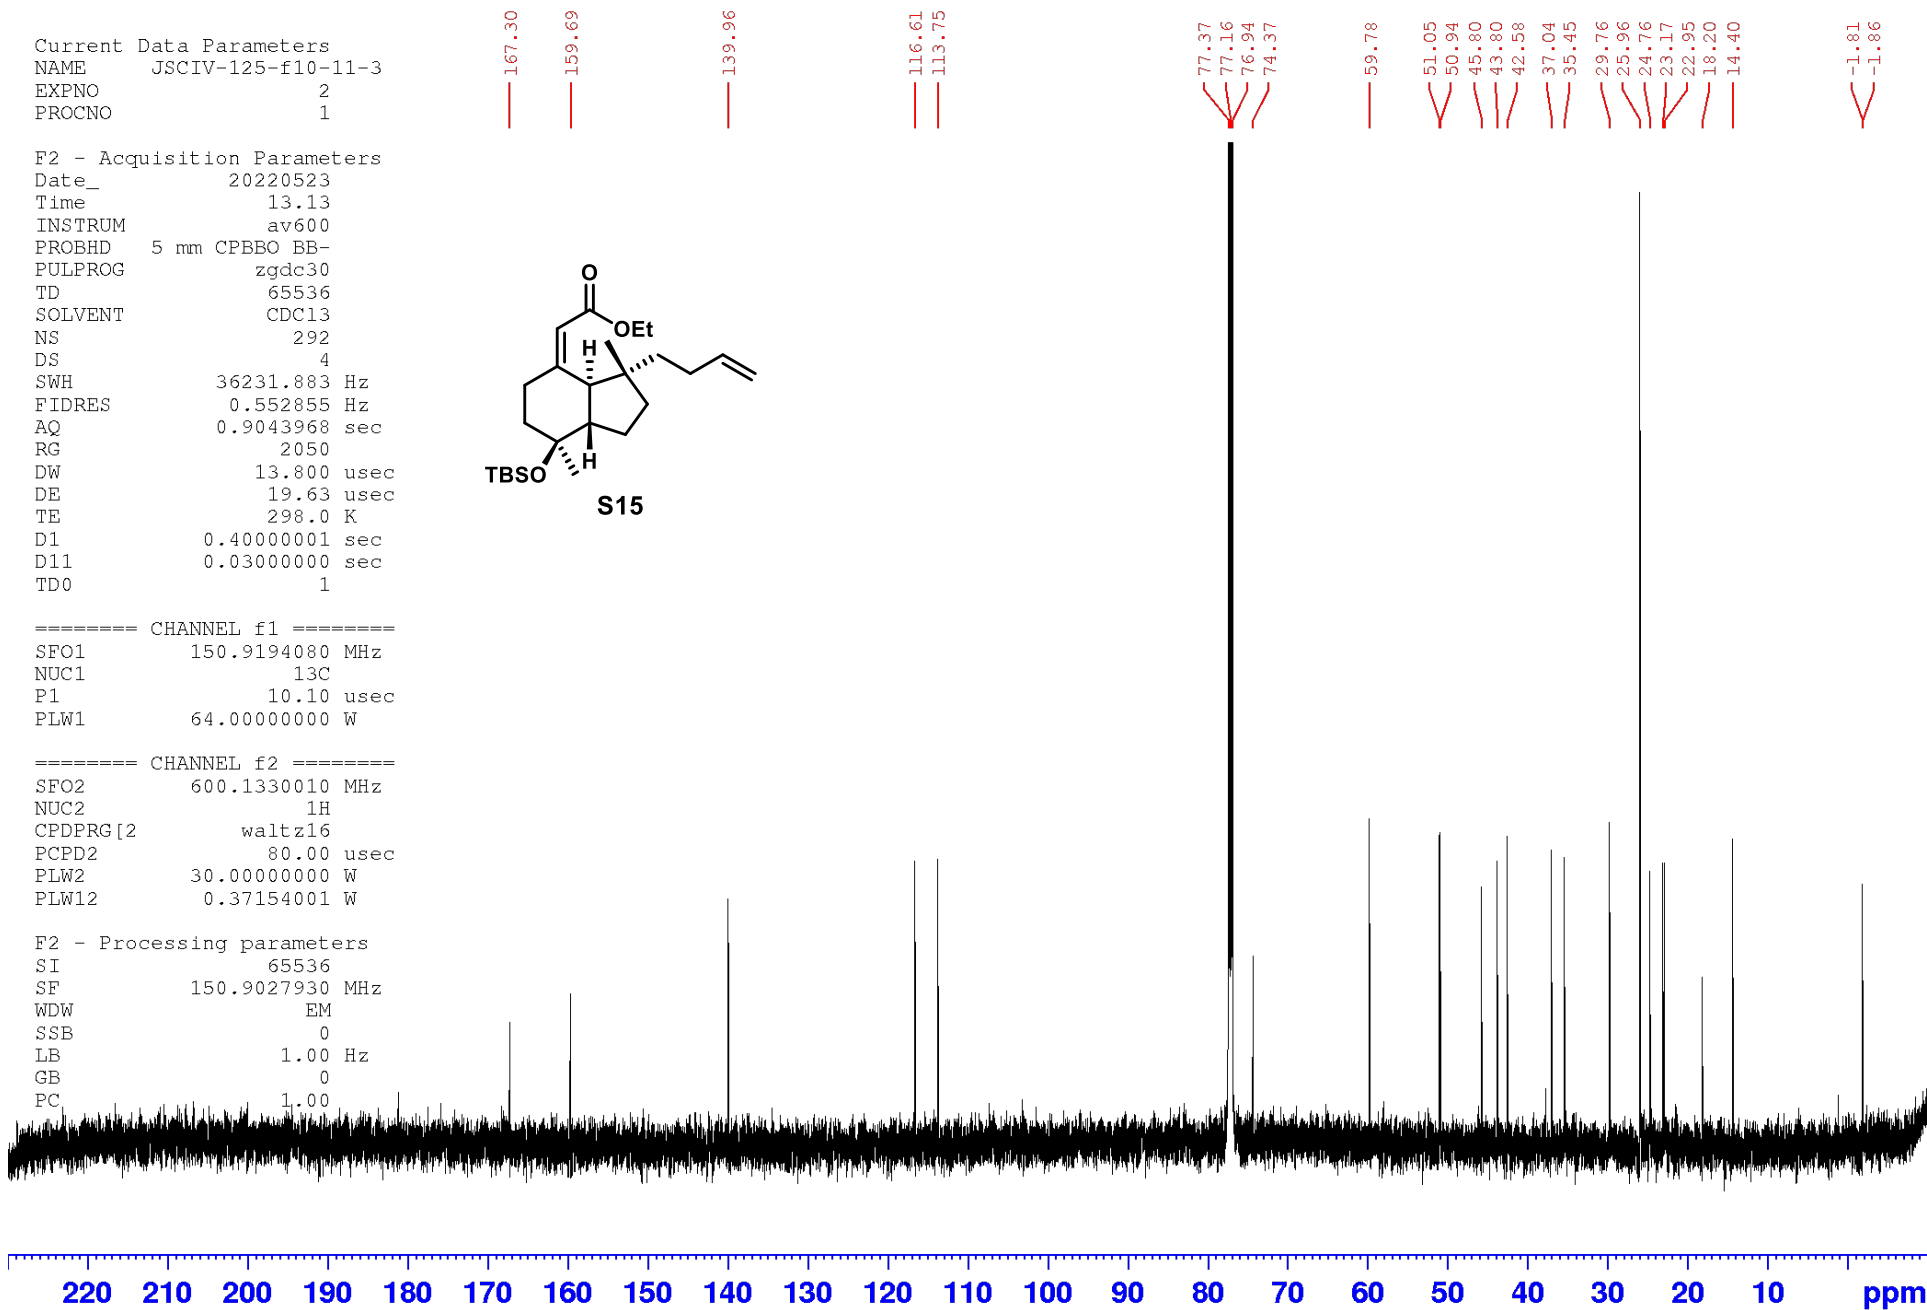

Current Data Parameters  
NAME JSCIV-125-f10-11-2  
EXPNO 2  
PROCNO 1

F2 - Acquisition Parameters  
Date\_ 20220523  
Time 10.53  
INSTRUM cryo500  
PROBHD 5 mm CPTCI 1H-  
PULPROG cosygp60.prd  
TD 2048  
SOLVENT CDCl3  
NS 2  
DS 16  
SWH 8012.820 Hz  
FIDRES 3.912510 Hz  
AQ 0.1277952 sec  
RG 512  
DW 62.400 usec  
DE 6.00 usec  
TE 298.0 K  
d0 0.00000300 sec  
d1 1.00000000 sec  
d13 0.00000300 sec  
d16 0.00020000 sec  
INO 0.00012480 sec

==== CHANNEL f1 =====  
NUC1 1H  
P1 9.75 usec  
PL1 1.60 dB  
SFO1 500.2235015 MHz

==== GRADIENT CHANNEL =====  
GPNAM[1] SMSQ10.100  
GPNAM[2] SMSQ10.100  
GFX1 0 %  
GFX2 0 %  
GPY1 0 %  
GPY2 0 %  
GPZ1 17.00 %  
GPZ2 17.00 %  
P16 1000.00 usec

F1 - Acquisition parameters  
TD 469  
SFO1 500.2235 MHz  
FIDRES 34.169811 Hz  
SW 16.018 ppm  
FnMODE QF

F2 - Processing parameters  
SI 1024  
SF 500.2200300 MHz  
WDW SINE  
SSB 0  
LB 0 Hz  
GB 0  
PC 1.00

F1 - Processing parameters  
SI 1024  
MC2 QF  
SF 500.2200314 MHz  
WDW SINE  
SSB 0  
LB 0 Hz  
GB 0

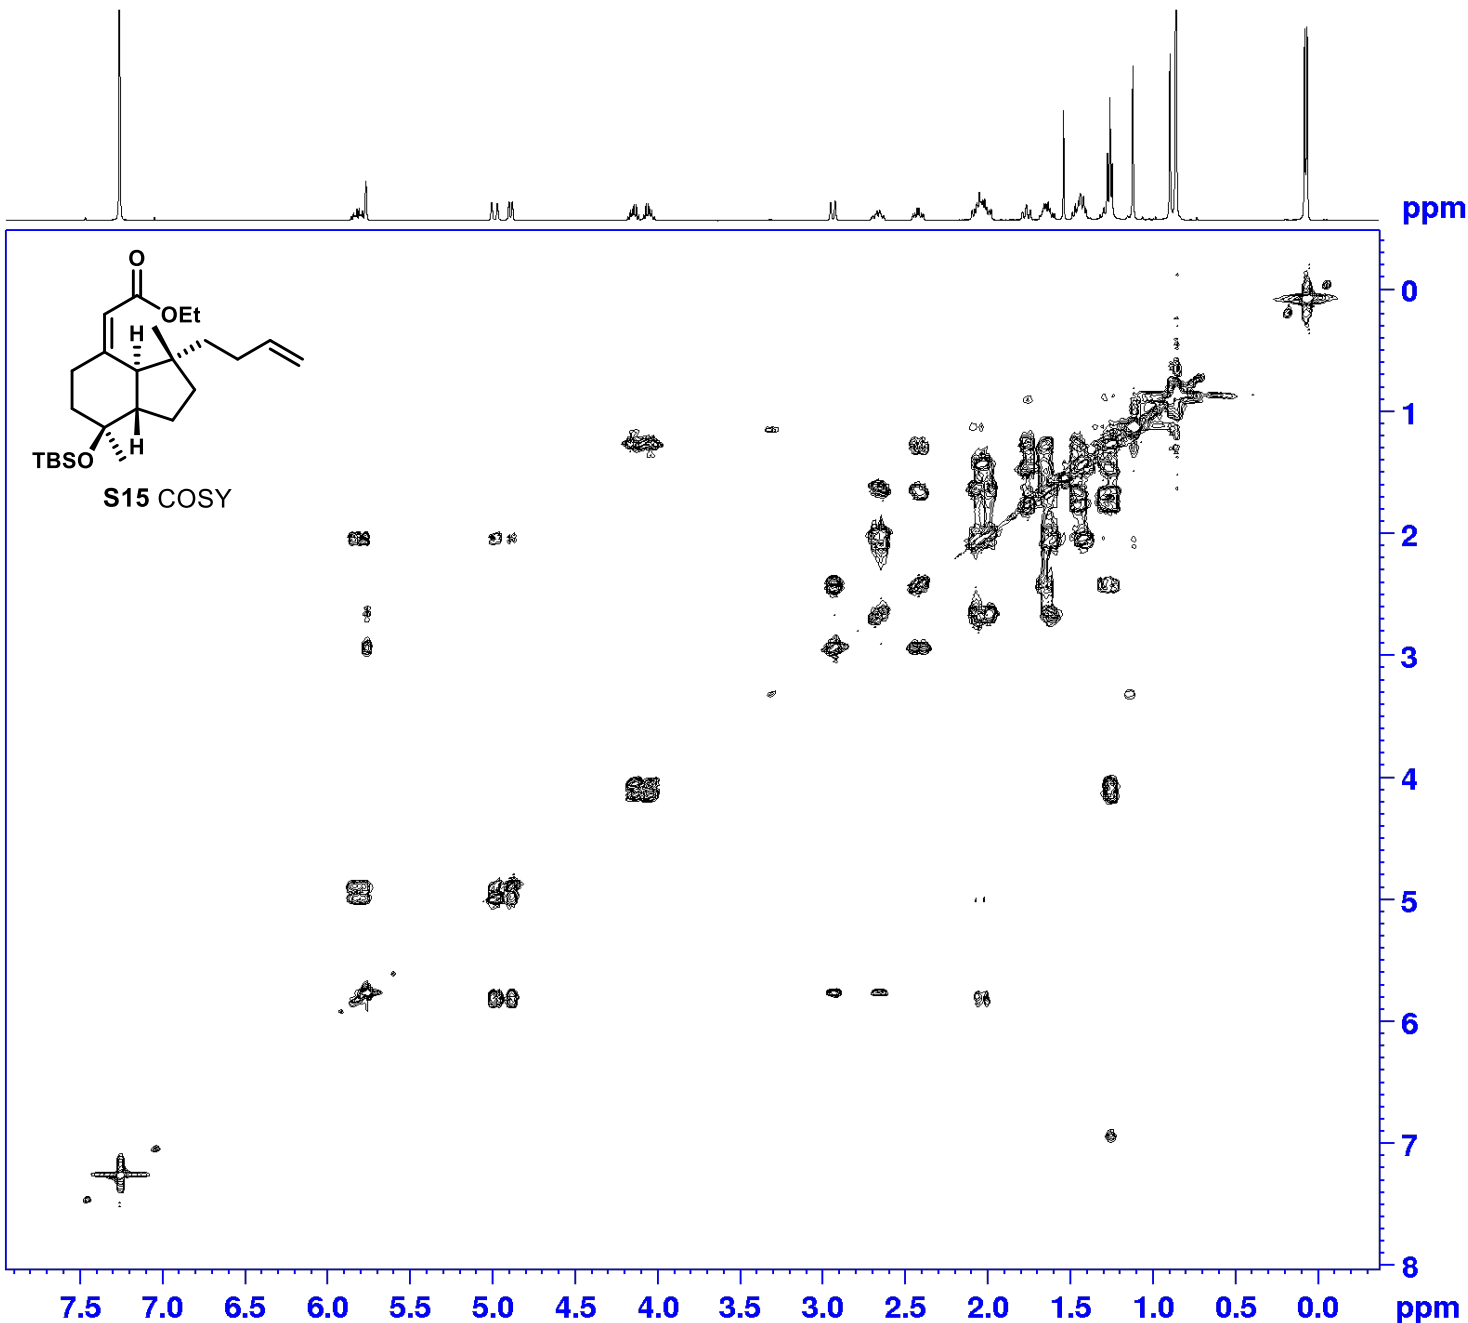



Current Data Parameters  
NAME JSCLV-125-E10-11-3  
EXPNO 3  
PROCNO 1

F2 - Acquisition Parameters  
Date\_ 20220523  
Time 13.17  
INSTRUM av600  
PROBHD 5 mm CPBBO BB-  
PULPROG haqcetppp2  
TD 1024  
SOLVENT CDCl3  
NS 2  
DS 16  
SWH 9615.385 Hz  
FIDRES 9.390024 Hz  
AQ 0.0532480 sec  
RG 2050  
DW 52.000 usec  
DE 10.00 usec  
TE 298.0 K  
CNST2 145.0000000  
DO 0.00000300 sec  
D1 1.10000002 sec  
D4 0.00172414 sec  
D11 0.05000000 sec  
D16 0.00020000 sec  
IN0 0.00001380 sec  
ZGPTNS

===== CHANNEL f1 =====  
SFO1 600.1342009 MHz  
NUC1 1H  
F1 10.00 usec  
P2 20.00 usec  
P28 1000.00 usec  
PLW1 30.00000000 W

===== CHANNEL f2 =====  
SFO2 150.9194083 MHz  
NUC2 13C  
CPDPRG2 gssp  
P3 10.10 usec  
P14 500.00 usec  
P24 2000.00 usec  
PCPD2 65.00 usec  
PLW0 0 W  
PLW2 64.00000000 W  
PLW12 1.47909999 W  
SPNAM[3] Crp60,0.5,20.1  
SPOKL3 0.500  
SPOFFS3 0 Hz  
SPW3 10.00000000 W  
SPNAM[7] Crp60comp.4  
SPOKL7 0.500  
SPOFFS7 0 Hz  
SPW7 10.00000000 W

===== GRADIENT CHANNEL =====  
GPNAM[1] SMSQ10.100  
GPNAM[2] SMSQ10.100  
GFZ1 80.00 %  
GFZ2 20.10 %  
P16 1000.00 usec

F1 - Acquisition parameters  
TD 256  
SFO1 150.9194 MHz  
FIDRES 283.061584 Hz  
SW 240.074 ppm  
EnMODE Echo-Antiecho

F2 - Processing parameters  
SI 1024  
SF 600.1300278 MHz  
WDW EM  
SSB 0  
LB 5.00 Hz  
GB 0  
PC 1.00

F1 - Processing parameters  
SI 1024  
MO2 echo-antiecho  
SF 150.9028143 MHz  
WDW QSINE  
SSB 3  
LB 0 Hz  
GB 0

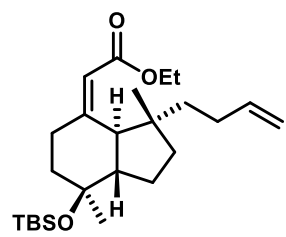

S15 HSQC

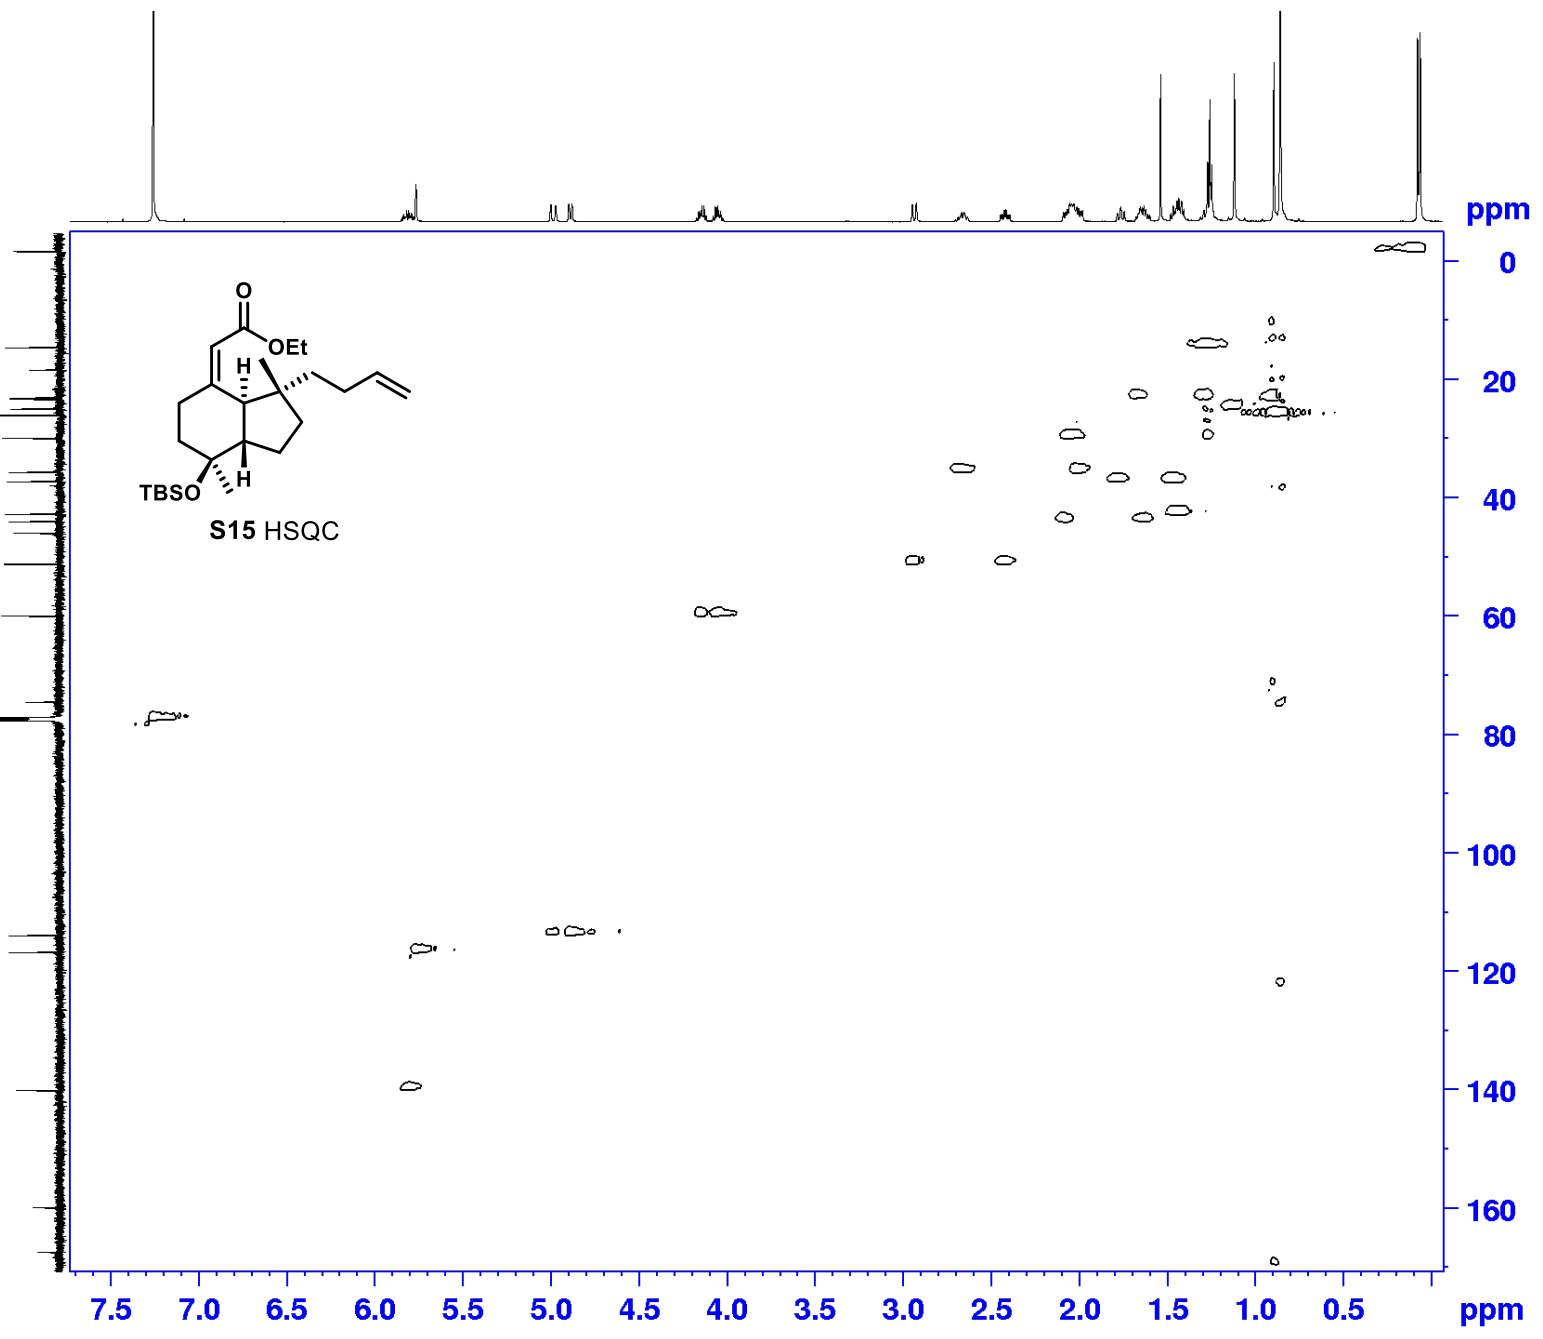

Current Data Parameters  
NAME JscIV-125-f10-11-3  
EXPNO 4  
PROCNO 1

F2 - Acquisition Parameters  
Date\_ 20220523  
Time 13.27  
INSTRUM av600  
PROBHD 5 mm CPBBO BB-  
PULPROG hmbcgp1pndqf  
TD 4096  
SOLVENT CDC13  
NS 2  
DS 16  
SWH 9615.385 Hz  
FIDRES 2.347506 Hz  
AQ 0.2129520 sec  
RG 2050  
DW 52.000 usec  
DE 10.00 usec  
TE 298.0 K  
CNST2 145.0000000  
CNST13 10.0000000  
D0 0.00000300 sec  
D1 1.10000002 sec  
D2 0.00344828 sec  
D6 0.05000000 sec  
D16 0.00020000 sec  
IN0 0.00001380 sec

----- CHANNEL f1 -----  
SFO1 600.1342009 MHz  
NUC1 1H  
P1 9.50 usec  
F2 19.00 usec  
PLW1 30.00000000 W

----- CHANNEL f2 -----  
SFO2 150.9194083 MHz  
NUC2 13C  
P3 10.10 usec  
PLW2 64.00000000 W

----- GRADIENT CHANNEL -----  
GPNAM[1] SMSQ10.100  
GPNAM[2] SMSQ10.100  
GPNAM[3] SMSQ10.100  
GP21 50.00 %  
GP22 30.00 %  
GP23 40.10 %  
P16 1000.00 usec

F1 - Acquisition parameters  
TD 256  
SFO1 150.9194 MHz  
FIDRES 283.061584 Hz  
SW 240.074 ppm  
FnMODE QF

F2 - Processing parameters  
SI 2048  
SF 600.1300327 MHz  
WDW SINE  
SSB 0  
LB 0 Hz  
GB 0  
PC 1.00

F1 - Processing parameters  
SI 1024  
MC2 QF  
SF 150.9028014 MHz  
WDW SINE  
SSB 0  
LB 0 Hz  
GB 0

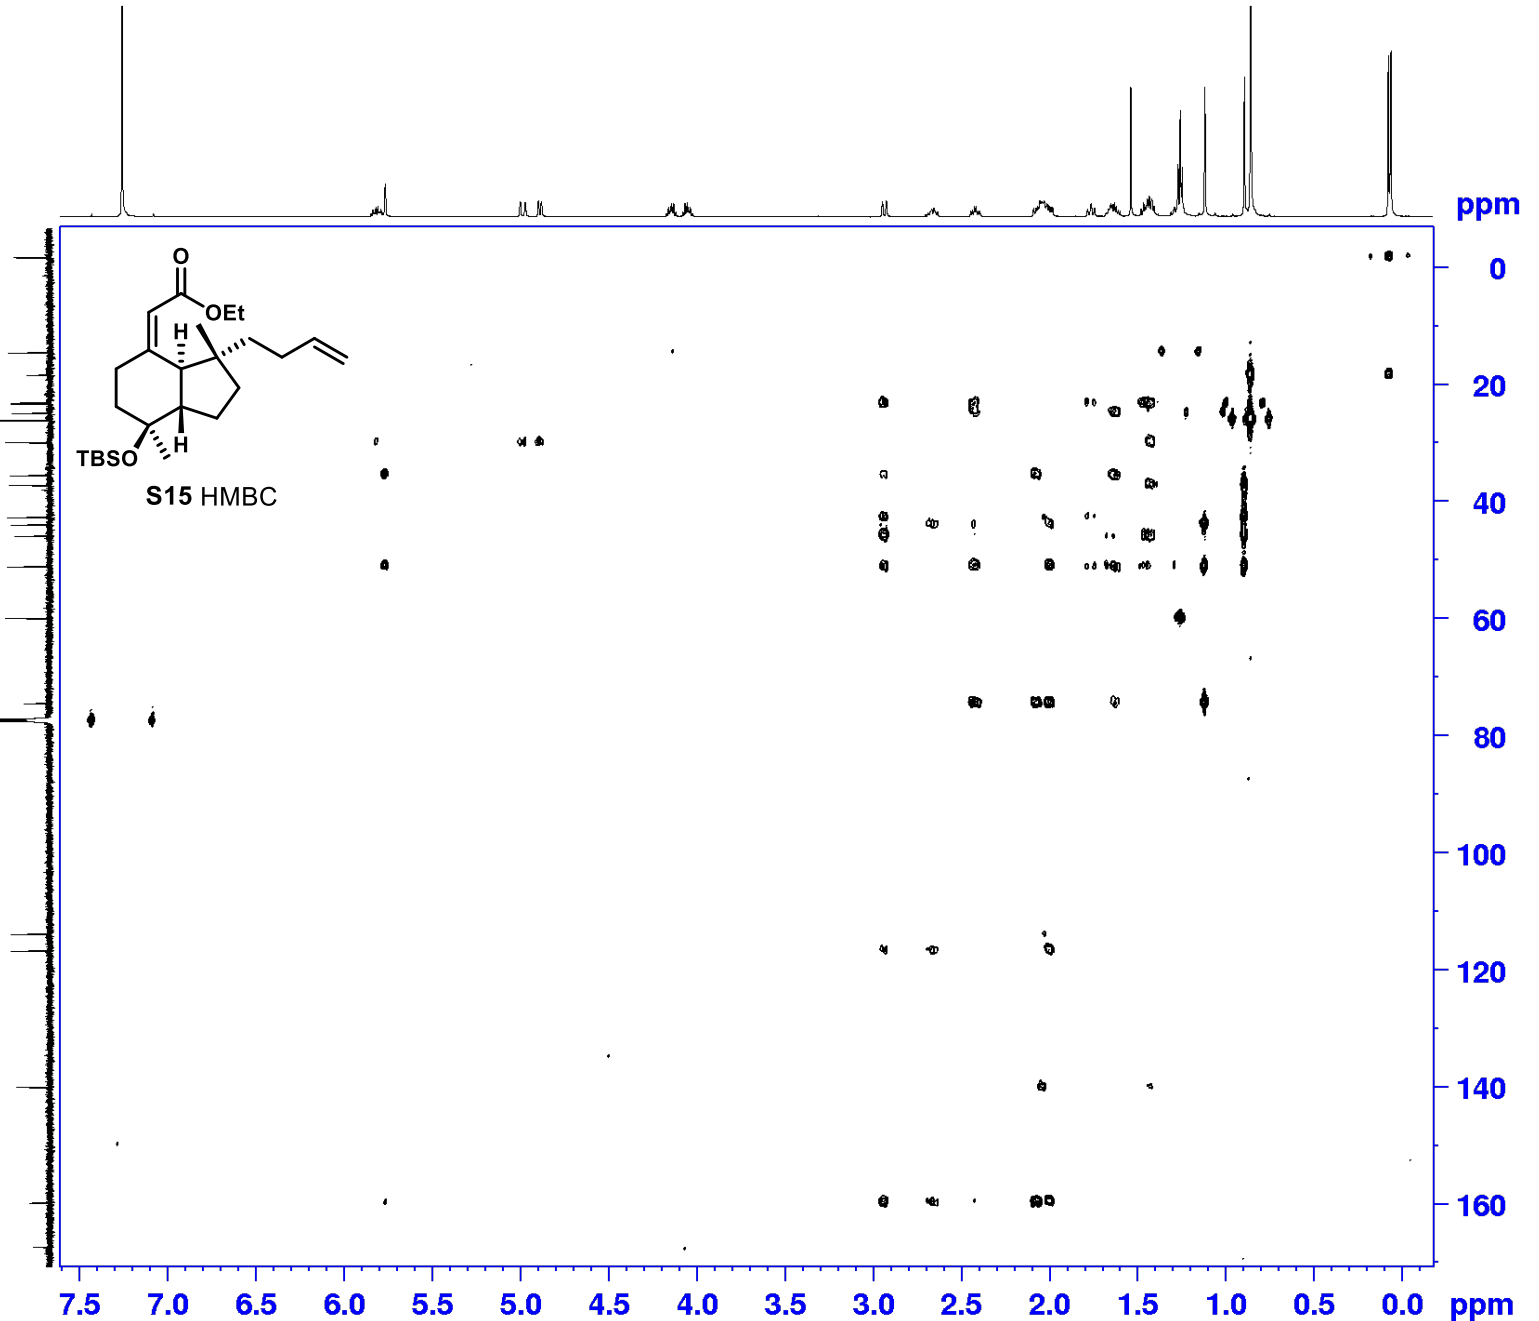

Current Data Parameters  
NAME JSCIV-125-f10-11-3  
EXPNO 5  
PROCNO 1

F2 - Acquisition Parameters  
Date\_ 20220523  
Time 13.40  
INSTRUM av600  
PROBHD 5 mm CPBBO BB-  
PULPROG noesygpph  
TD 2048  
SOLVENT CDCl3  
NS 2  
DS 16  
SWH 9615.385 Hz  
FIDRES 4.695012 Hz  
AQ 0.1064960 sec  
RG 57  
DW 52.000 usec  
DE 16.68 usec  
TE 297.9 K  
D0 0.00003990 sec  
D1 2.00000000 sec  
D8 1.00000000 sec  
D16 0.00020000 sec  
IN0 0.00010400 sec

----- CHANNEL f1 -----  
SFO1 600.1342009 MHz  
NUC1 1H  
P1 9.50 usec  
P2 19.00 usec  
PLW1 30.00000000 W

===== GRADIENT CHANNEL =====  
GPNAM[1] SMSQ10.100  
GPZ1 40.00 %  
P16 1000.00 usec

F1 - Acquisition parameters  
TD 256  
SFO1 600.1342 MHz  
FIDRES 75.120193 Hz  
SW 16.022 ppm  
FnMODE States-TPPI

F2 - Processing parameters  
SI 1024  
SF 600.1300238 MHz  
WDW QSINE  
SSB 2  
LB 0 Hz  
GB 0  
PC 1.00

F1 - Processing parameters  
SI 1024  
MC2 States-TPPI  
SF 600.1300385 MHz  
WDW QSINE  
SSB 2  
LB 0 Hz  
GB 0

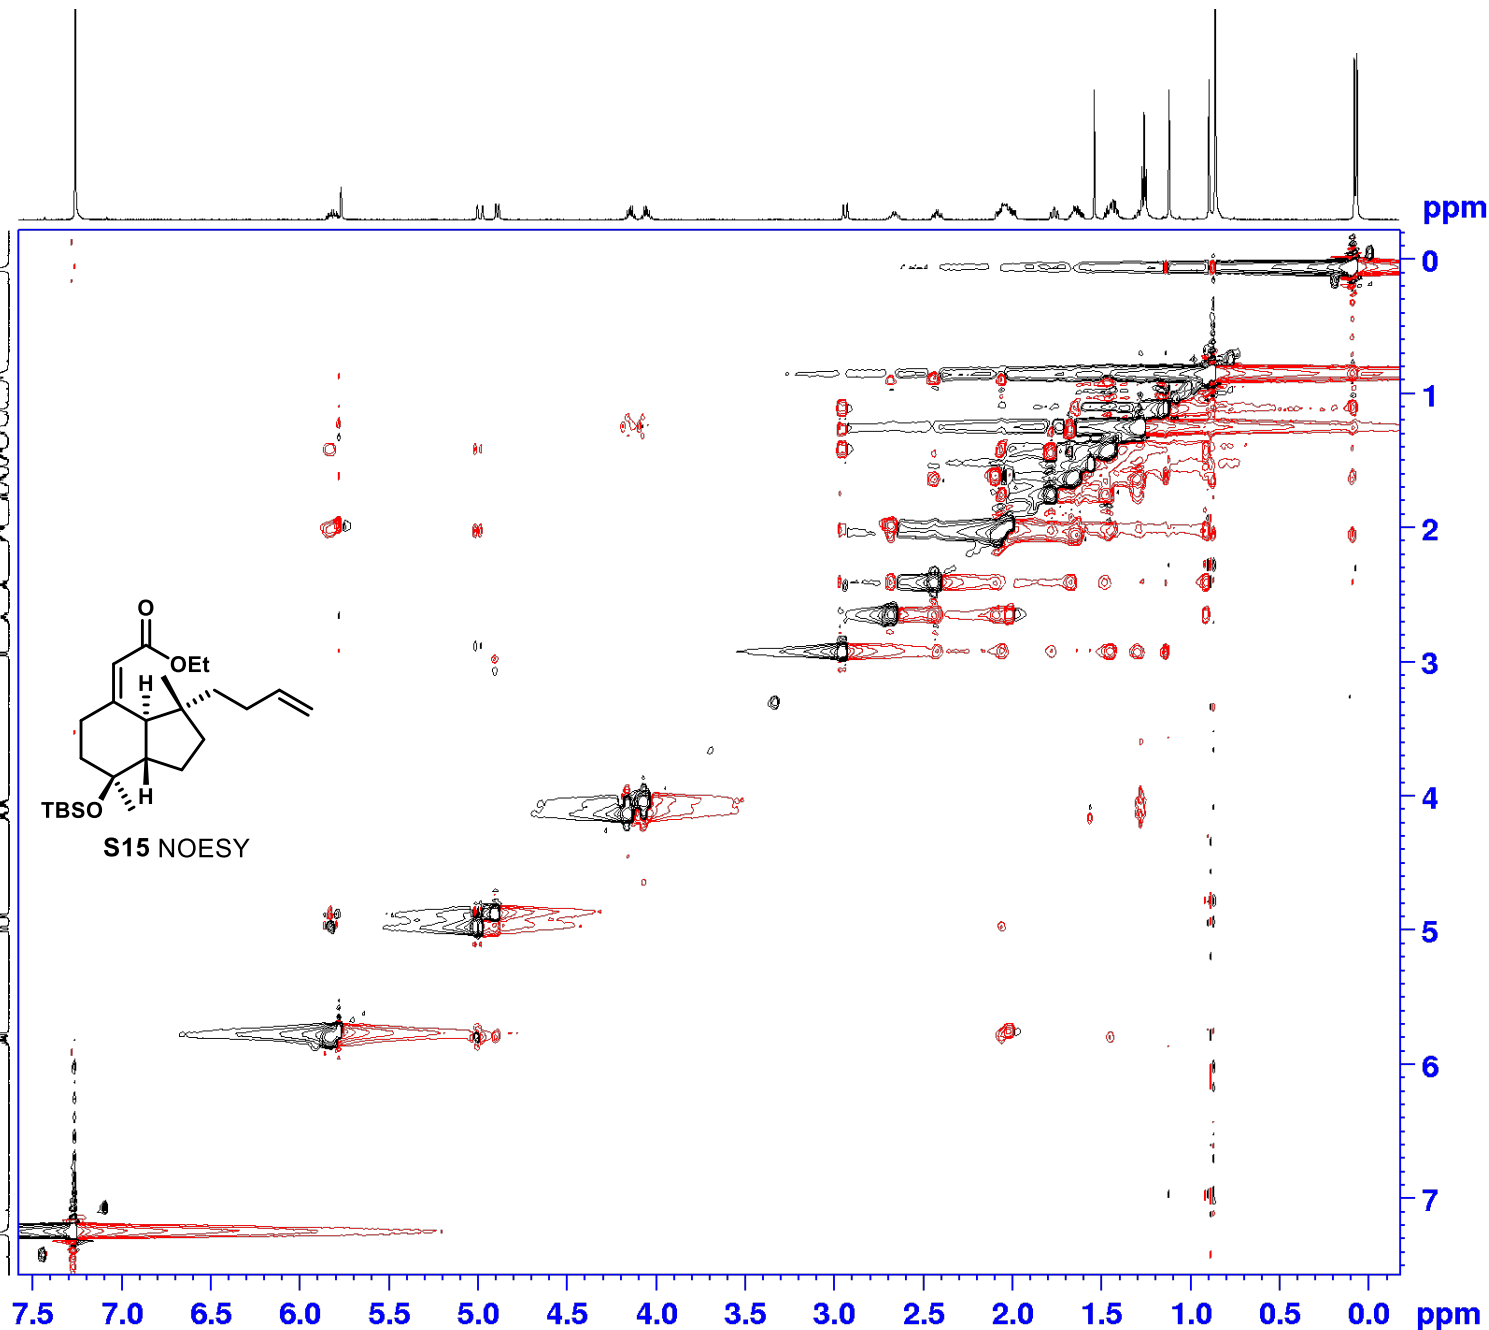

Current Data Parameters  
NAME JSCIV-125-f19-27-2  
EXPNO 1  
PROCNO 1

F2 - Acquisition Parameters  
Date\_ 20220523  
Time 15.26  
INSTRUM av600  
PROBHD 5 mm CPBBO BB-  
PULPROG zg30  
TD 98074  
SOLVENT CDC13  
NS 8  
DS 2  
SWH 9615.385 Hz  
FIDRES 0.098042 Hz  
AQ 5.0998478 sec  
RG 10  
DW 52.000 usec  
DE 14.23 usec  
TE 297.9 K  
D1 0.10000000 sec  
TD0 1

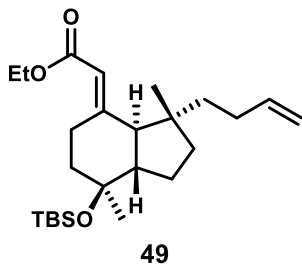

==== CHANNEL f1 =====  
SFO1 600.134209 MHz  
NUC1 1H  
P1 9.50 usec  
PLW1 30.00000000 W

F2 - Processing parameters  
SI 65536  
SF 600.1300353 MHz  
WDW EM  
SSB 0  
LB 0.30 Hz  
GB 0  
PC 1.00

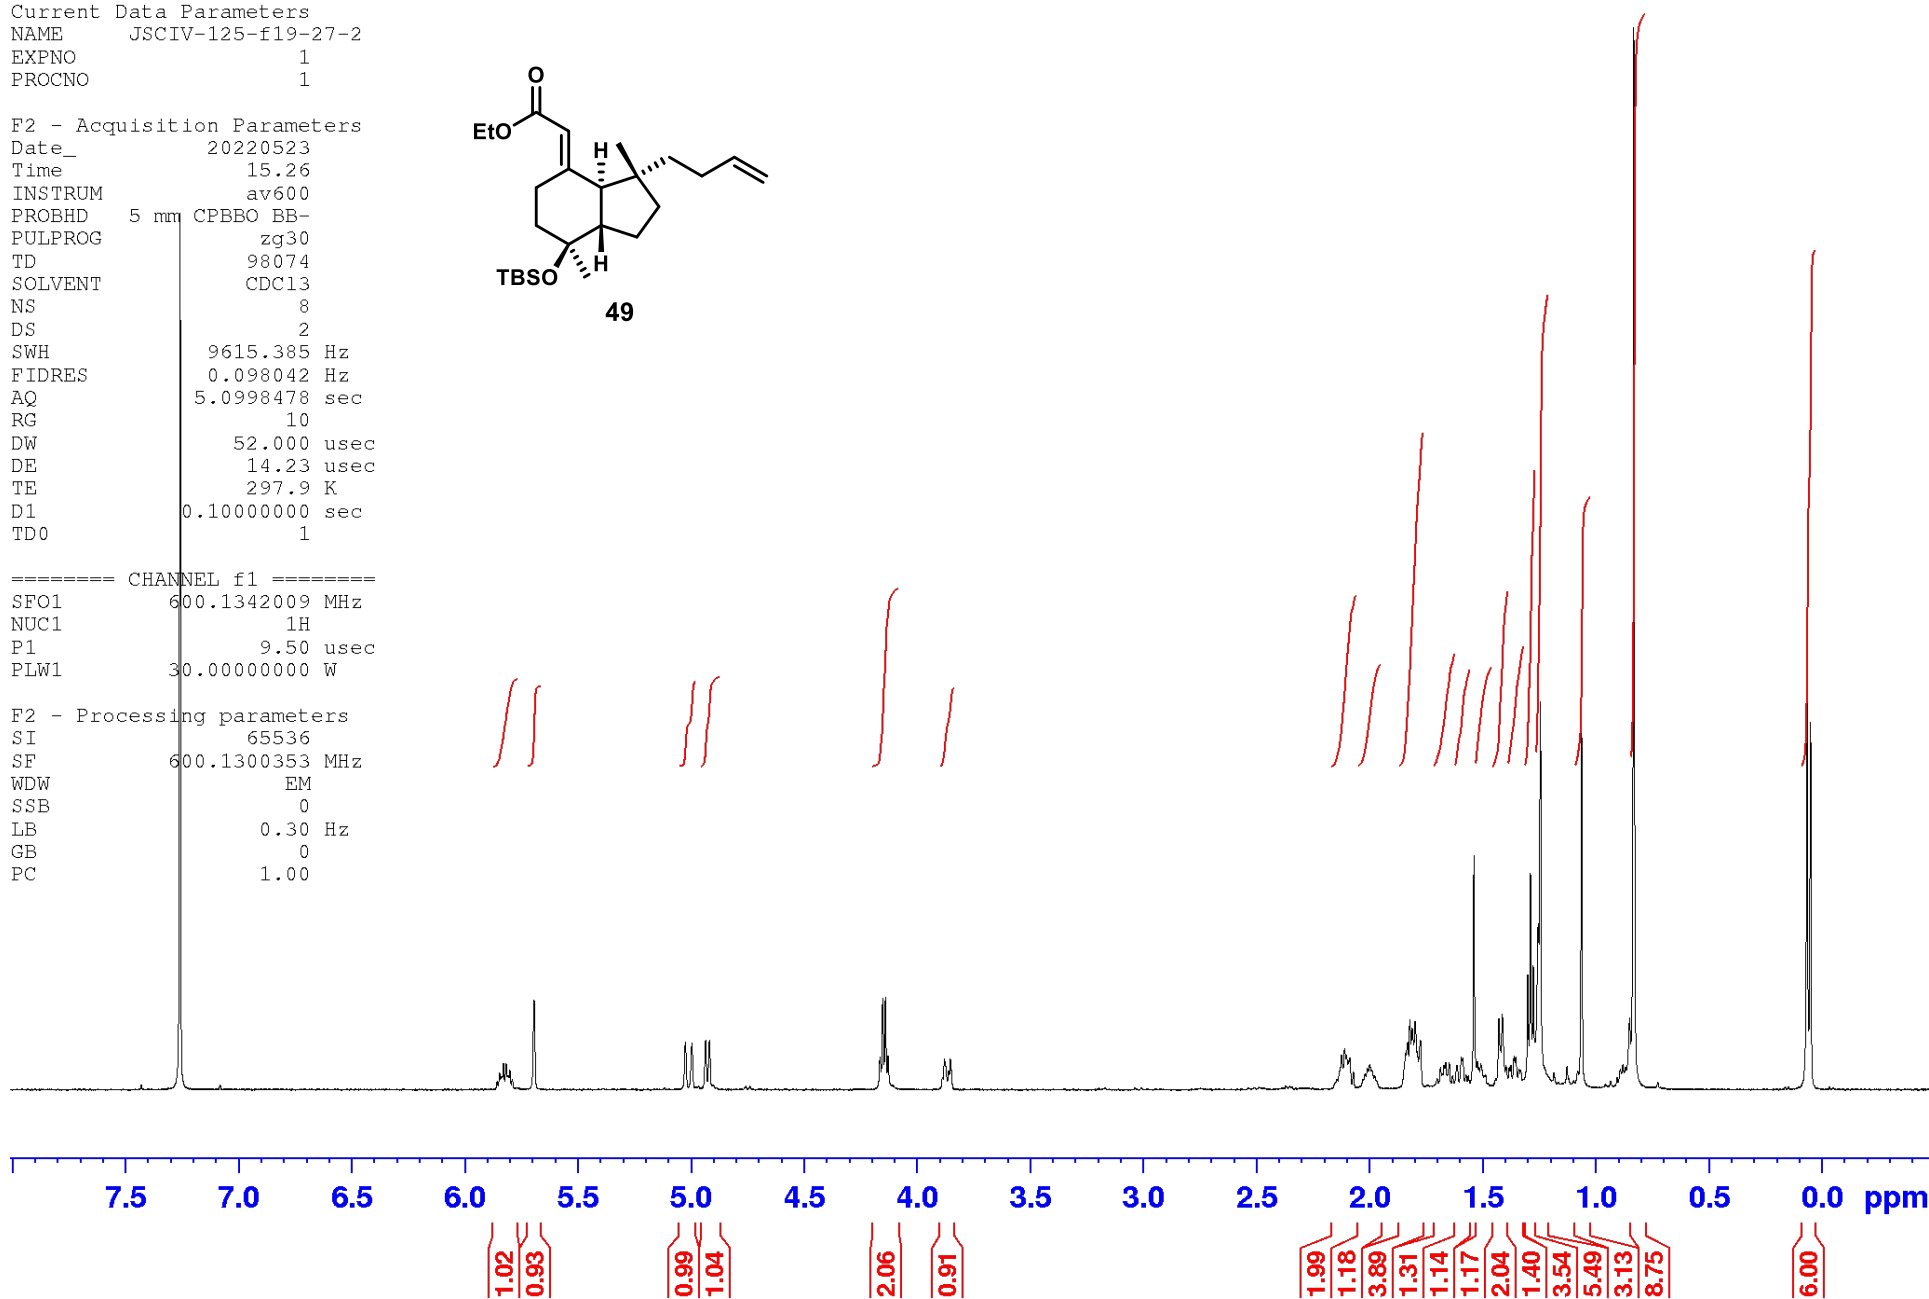

Current Data Parameters  
NAME JSCIV-125-f19-27-2  
EXPNO 2  
PROCNO 1

F2 - Acquisition Parameters  
Date\_ 20220523  
Time 15.28  
INSTRUM av600  
PROBHD 5 mm CPBBO BB-  
PULPROG zgdc30  
TD 65536  
SOLVENT CDC13  
NS 200  
DS 4  
SWH 36231.883 Hz  
FIDRES 0.552855 Hz  
AQ 0.9043968 sec  
RG 2050  
DW 13.800 usec  
DE 19.63 usec  
TE 298.0 K  
D1 0.40000001 sec  
D11 0.03000000 sec  
TD0 1

===== CHANNEL f1 =====  
SFO1 150.9194080 MHz  
NUC1 13C  
P1 10.10 usec  
PLW1 64.00000000 W

===== CHANNEL f2 =====  
SFO2 600.1330010 MHz  
NUC2 1H  
CPDPRG[2] waltz16  
PCPD2 80.00 usec  
PLW2 30.00000000 W  
PLW12 0.37154001 W

F2 - Processing parameters  
SI 65536  
SF 150.9027928 MHz  
WDW EM  
SSB 0  
LB 1.00 Hz  
GB 0  
PC 1.00

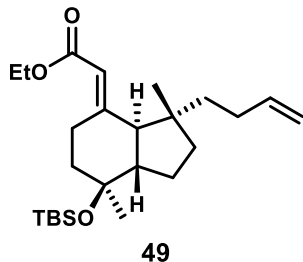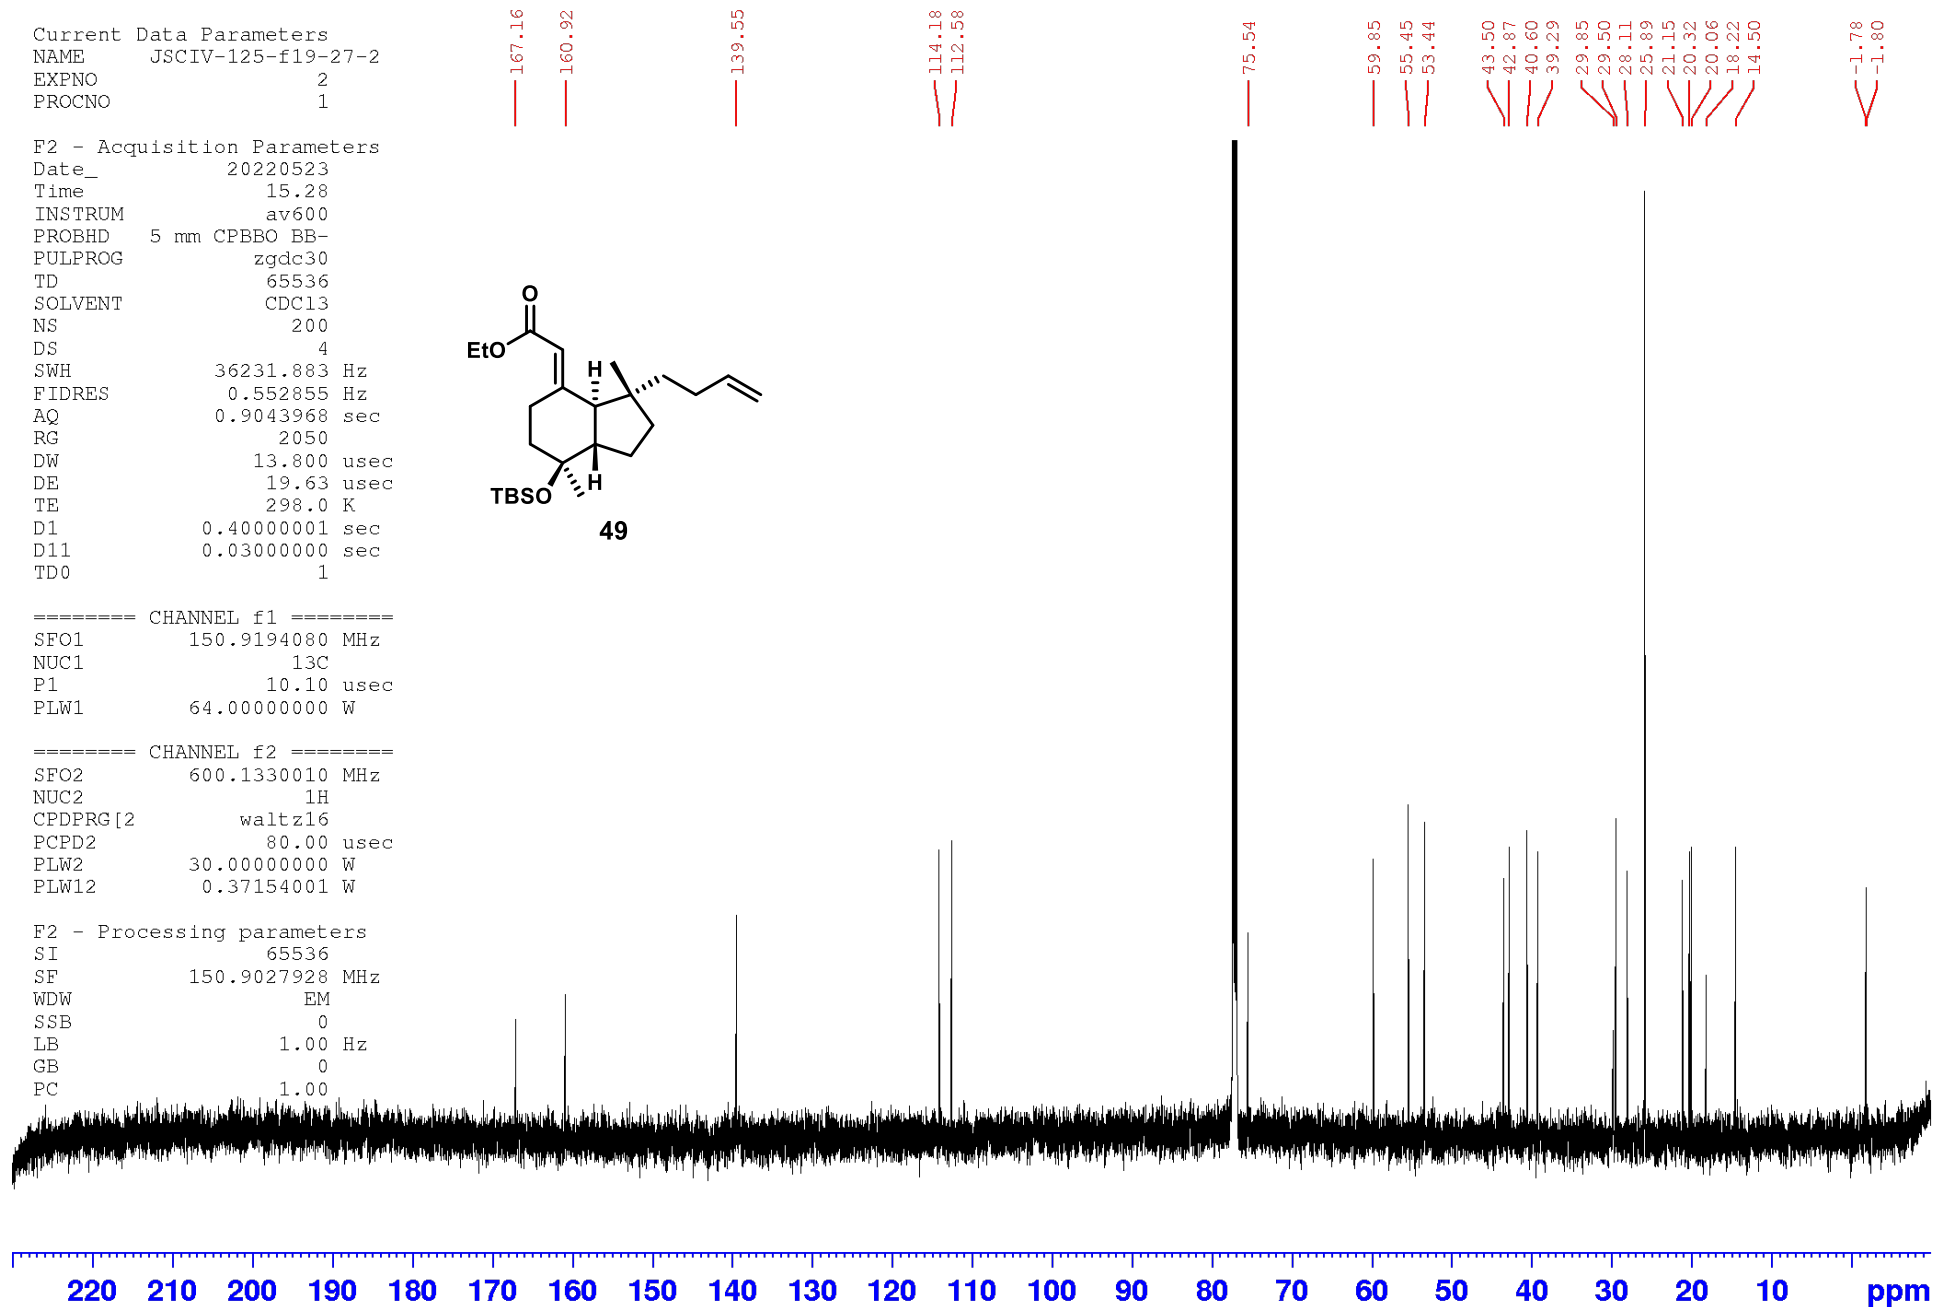

Current Data Parameters  
NAME JSCIV-125-fl9-27-2  
EXPNO 4  
PROCNO 1

F2 - Acquisition Parameters  
Date\_ 20220523  
Time 15.40  
INSTRUM av600  
PROBHD 5 mm CPBBO BB-  
PULPROG cosygppqf  
TD 2048  
SOLVENT CDCl3  
NS 1  
DS 16  
SWH 9615.385 Hz  
FIDRES 4.695012 Hz  
AQ 0.1064960 sec  
RG 645  
DW 52.000 usec  
DE 10.00 usec  
TE 297.9 K  
DO 0.00000300 sec  
D1 1.48689198 sec  
D13 0.00000400 sec  
D16 0.00020000 sec  
INO 0.00010400 sec

===== CHANNEL f1 =====  
SF01 600.1342009 MHz  
NUC1 1H  
P0 9.50 usec  
P1 9.50 usec  
PLW1 30.00000000 W

===== GRADIENT CHANNEL =====  
GPNAM[1] SMSQ10.100  
GPZ1 10.00 %  
P16 1000.00 usec

F1 - Acquisition parameters  
TD 256  
SF01 600.1342 MHz  
FIDRES 75.120193 Hz  
SW 16.022 ppm  
FnMODE QF

F2 - Processing parameters  
SI 1024  
SF 600.1300328 MHz  
WDW SINE  
SSB 0  
LB 0 Hz  
GB 0  
PC 1.00

F1 - Processing parameters  
SI 1024  
MC2 QF  
SF 600.1300336 MHz  
WDW SINE  
SSB 0  
LB 0 Hz  
GB 0

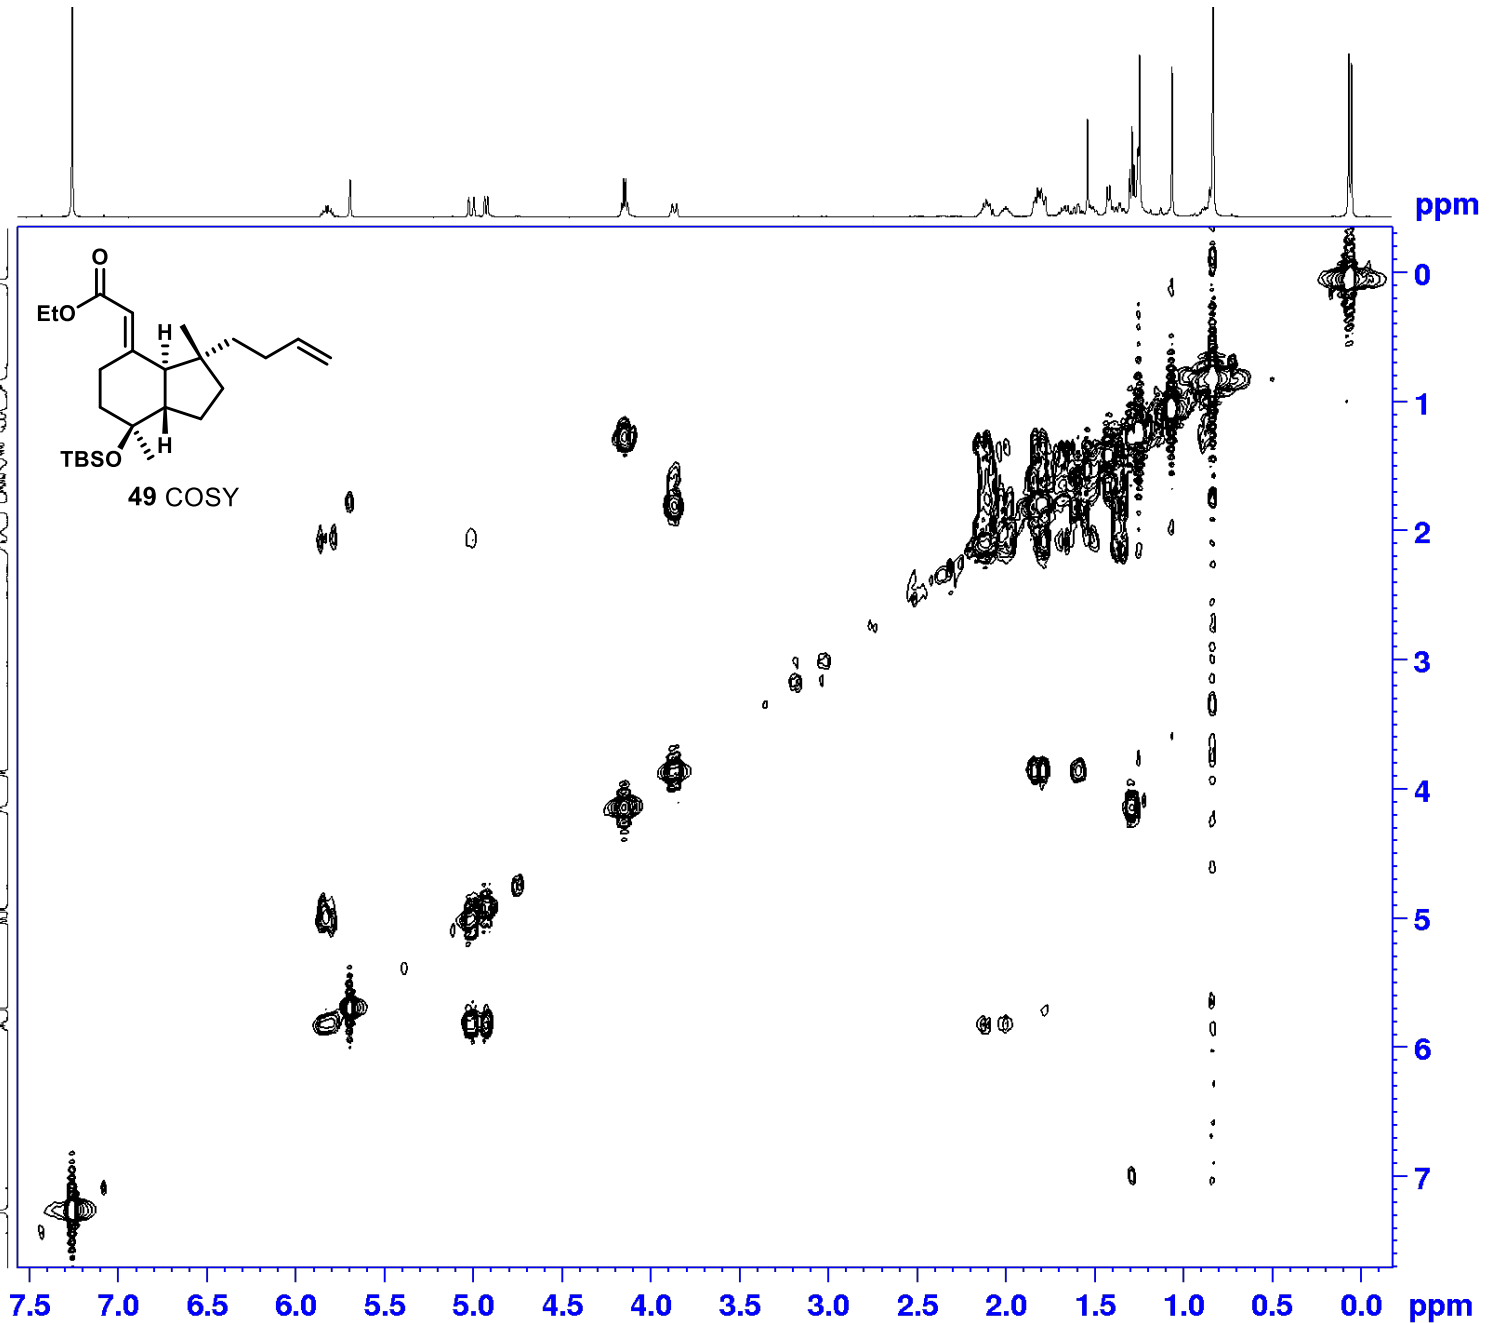

Current Data Parameters  
NAME JSCLV-125-E19-27-2  
EXPNO 5  
PROCNO 1

F2 - Acquisition Parameters  
Date\_ 20220523  
Time 15.48  
INSTRUM av600  
PROBHD 5 mm CPBBO BB-  
PULPROG haqcetppp.2  
TD 1024  
SOLVENT CDCl3  
NS 2  
DS 16  
SWH 9615.385 Hz  
FIDRES 9.390024 Hz  
AQ 0.0532480 sec  
RG 2050  
DW 52.000 usec  
DE 10.00 usec  
TE 297.9 K  
CNST2 145.0000000  
D0 0.00000300 sec  
D1 1.10000002 sec  
D4 0.00172414 sec  
D11 0.05000000 sec  
D16 0.00020000 sec  
IN0 0.00001380 sec  
ZGPTNS

==== CHANNEL F1 =====  
SF01 600.1342009 MHz  
NUC1 1H  
P1 10.00 usec  
P2 20.00 usec  
P28 1000.00 usec  
PLW1 30.00000000 W

==== CHANNEL F2 =====  
SF02 150.9194083 MHz  
NUC2 13C  
CPDPRG2 gssp  
P3 10.10 usec  
P14 500.00 usec  
P24 2000.00 usec  
PCPD2 65.00 usec  
PLW0 0 W  
PLW2 64.00000000 W  
PLW12 1.47909999 W  
SPNAM[3] Crp60,0.5,20.1  
SFOML3 0.500  
SFOFFS3 0 Hz  
SFH3 10.00000000 W  
SPNAM[7] Crp60comp.4  
SFOML7 0.500  
SFOFFS7 0 Hz  
SPW7 10.00000000 W

==== GRADIENT CHANNEL =====  
GPNAM[1] SMSQ10.100  
GPNAM[2] SMSQ10.100  
GFZ1 80.00 %  
GFZ2 20.10 %  
P16 1000.00 usec

F1 - Acquisition parameters  
TD 256  
SF01 150.9194 MHz  
FIDRES 283.061584 Hz  
SW 240.074 ppm  
FaMODE Echo-Antiecho

F2 - Processing parameters  
SI 1024  
SF 600.1300346 MHz  
WDW EM  
SSB 0  
LB 5.00 Hz  
GB 0  
PC 1.00

F1 - Processing parameters  
SI 1024  
MO2 echo-antiecho  
SF 150.9028122 MHz  
WDW QSINE  
SSB 3  
LB 0 Hz  
GB 0

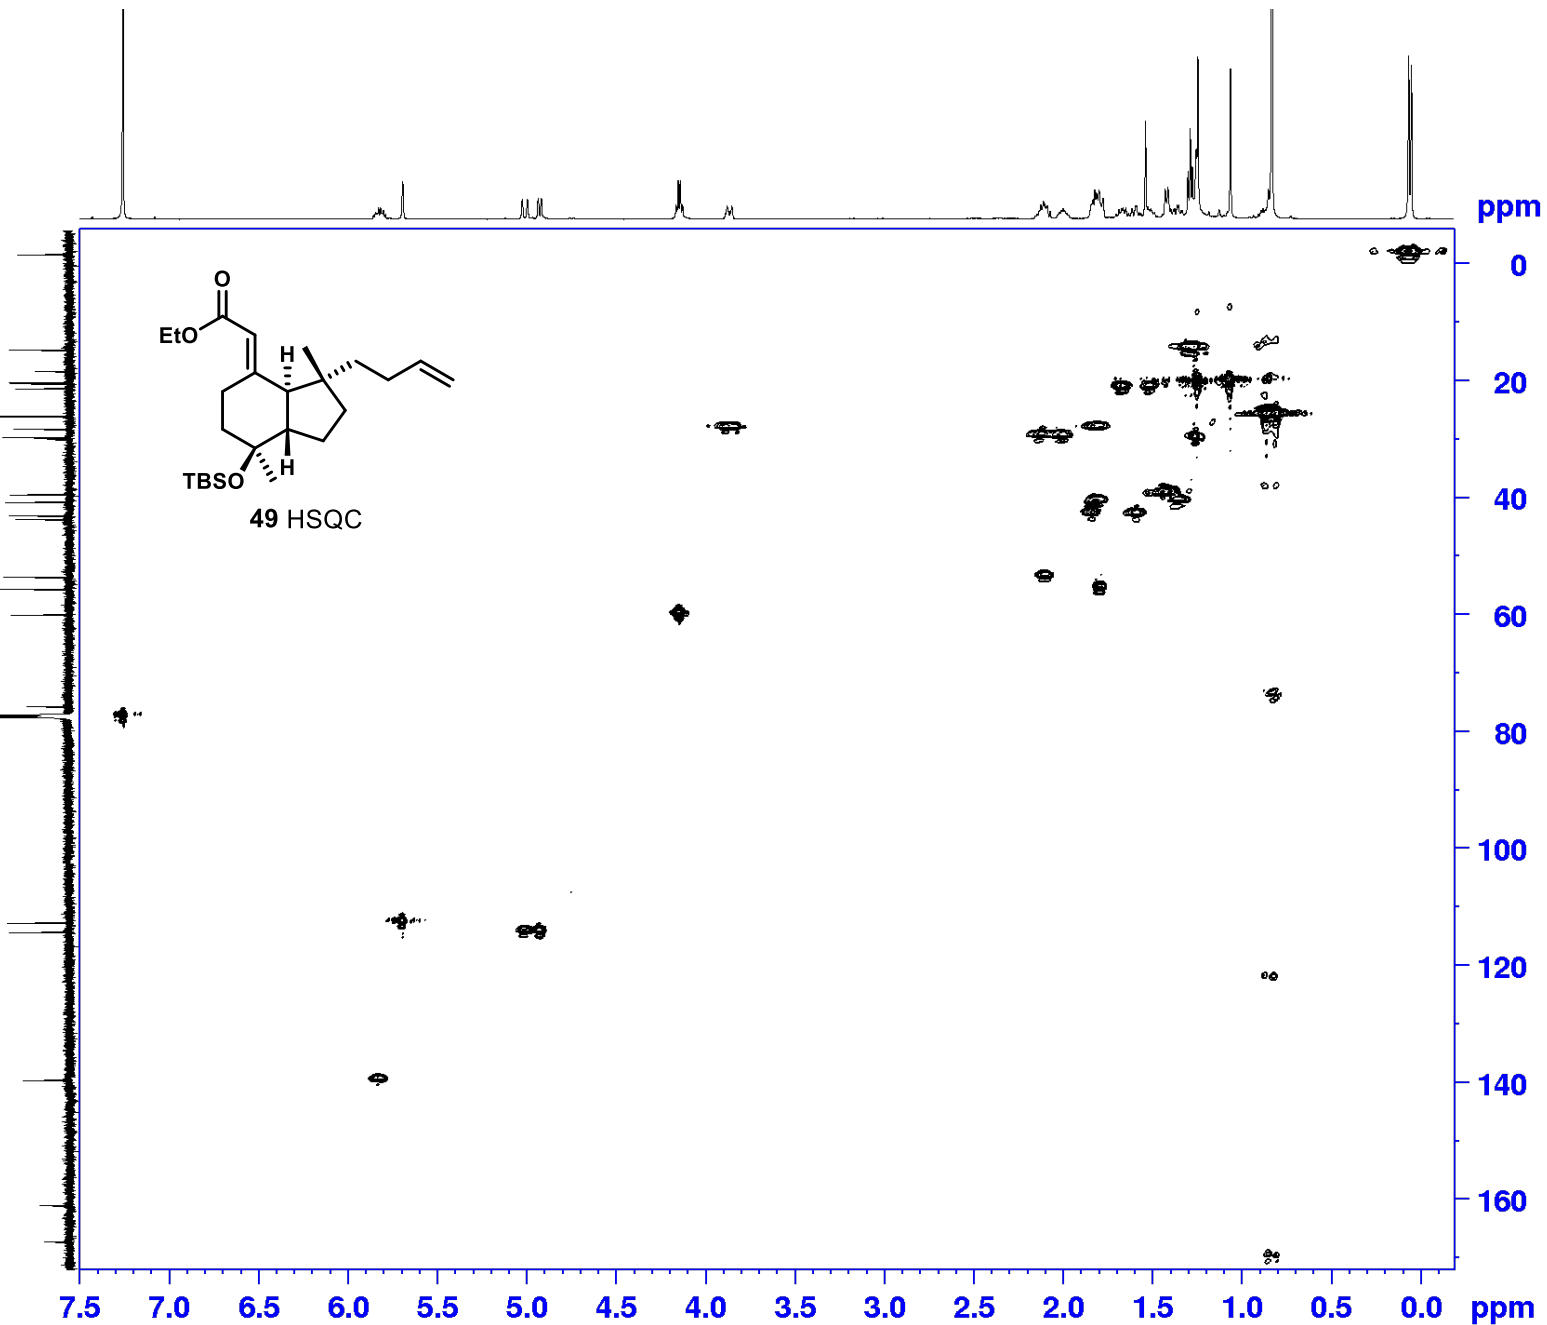

Current Data Parameters  
NAME JscIV-125-f19-27-2  
EXPNO 8  
PROCNO 1

F2 - Acquisition Parameters  
Date\_ 20220523  
Time 15.58  
INSTRUM av600  
PROBHD 5 mm CPBBO BB-  
PULPROG hmbcgp1pndqf  
TD 4096  
SOLVENT CDCl3  
NS 2  
DS 16  
SWH 9615.385 Hz  
FIDRES 2.347506 Hz  
AQ 0.2129920 sec  
RG 2050  
DW 52.000 usec  
DE 10.00 usec  
TE 297.9 K  
CNST2 145.0000000  
CNST13 10.0000000  
D0 0.00000300 sec  
D1 1.10000002 sec  
D2 0.00344828 sec  
D6 0.05000000 sec  
D16 0.00020000 sec  
IN0 0.00001380 sec

----- CHANNEL f1 -----  
SFO1 600.1342009 MHz  
NUC1 1H  
P1 9.50 usec  
P2 19.00 usec  
PLW1 30.00000000 W

----- CHANNEL f2 -----  
SFO2 150.9194083 MHz  
NUC2 13C  
P3 10.10 usec  
PLW2 64.00000000 W

===== GRADIENT CHANNEL =====  
GPNAM[1] SMSQ10.100  
GPNAM[2] SMSQ10.100  
GPNAM[3] SMSQ10.100  
GPZ1 50.00 %  
GPZ2 30.00 %  
GPZ3 40.10 %  
P16 1000.00 usec

F1 - Acquisition parameters  
TD 256  
SFO1 150.9194 MHz  
FIDRES 283.061584 Hz  
SW 240.074 ppm  
FnMODE QF

F2 - Processing parameters  
SI 2048  
SF 600.1300379 MHz  
WDW SINE  
SSB 0  
LB 0 Hz  
GB 0  
PC 1.00

F1 - Processing parameters  
SI 1024  
MC2 QF  
SF 150.9028170 MHz  
WDW SINE  
SSB 0  
LB 0 Hz  
GB 0

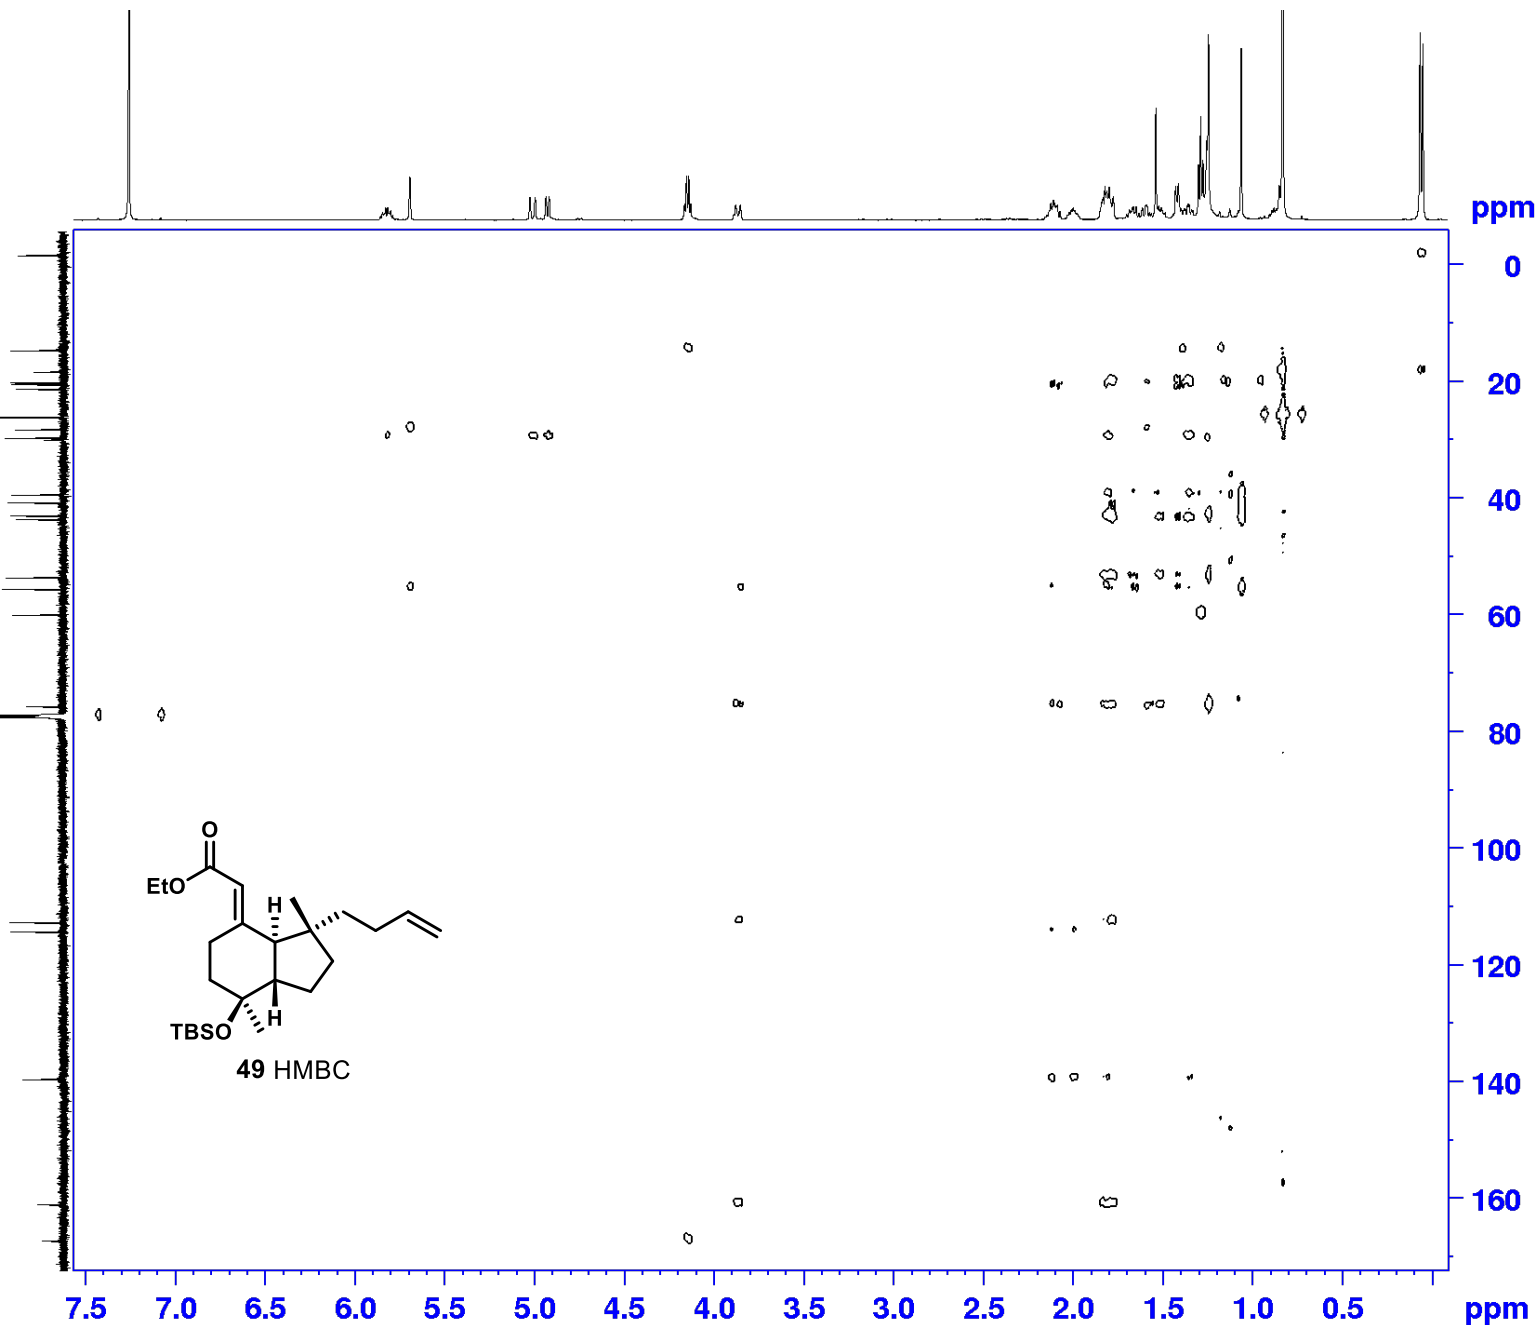



Current Data Parameters  
NAME JSCIV-125-fl9-27-2  
EXPNO 7  
PROCNO 1

F2 - Acquisition Parameters  
Date\_ 20220523  
Time 16.11  
INSTRUM av600  
PROBHD 5 mm CPBBO BB-  
PULPROG noesygp  
TD 2048  
SOLVENT CDCl3  
NS 2  
DS 16  
SWH 9615.385 Hz  
FIDRES 4.695012 Hz  
AQ 0.1064960 sec  
RG 57  
DW 52.000 usec  
DE 16.68 usec  
TE 297.9 K  
DO 0.00003990 sec  
D1 2.00000000 sec  
D8 1.00000000 sec  
D16 0.00020000 sec  
INO 0.00010400 sec

===== CHANNEL f1 =====  
SF01 600.1342009 MHz  
NUC1 1H  
P1 9.50 usec  
P2 19.00 usec  
PLW1 30.00000000 W

===== GRADIENT CHANNEL =====  
GFNAM[1] SMSQ10.100  
GPZ1 40.00 %  
P16 1000.00 usec

F1 - Acquisition parameters  
TD 256  
SF01 600.1342 MHz  
FIDRES 75.120193 Hz  
SW 16.022 ppm  
FnMODE States-TPPI

F2 - Processing parameters  
SI 1024  
SF 600.1300339 MHz  
WDW QSINE  
SSB 2  
LB 0 Hz  
GB 0  
PC 1.00

F1 - Processing parameters  
SI 1024  
MC2 States-TPPI  
SF 600.1300383 MHz  
WDW QSINE  
SSB 2  
LB 0 Hz  
GB 0

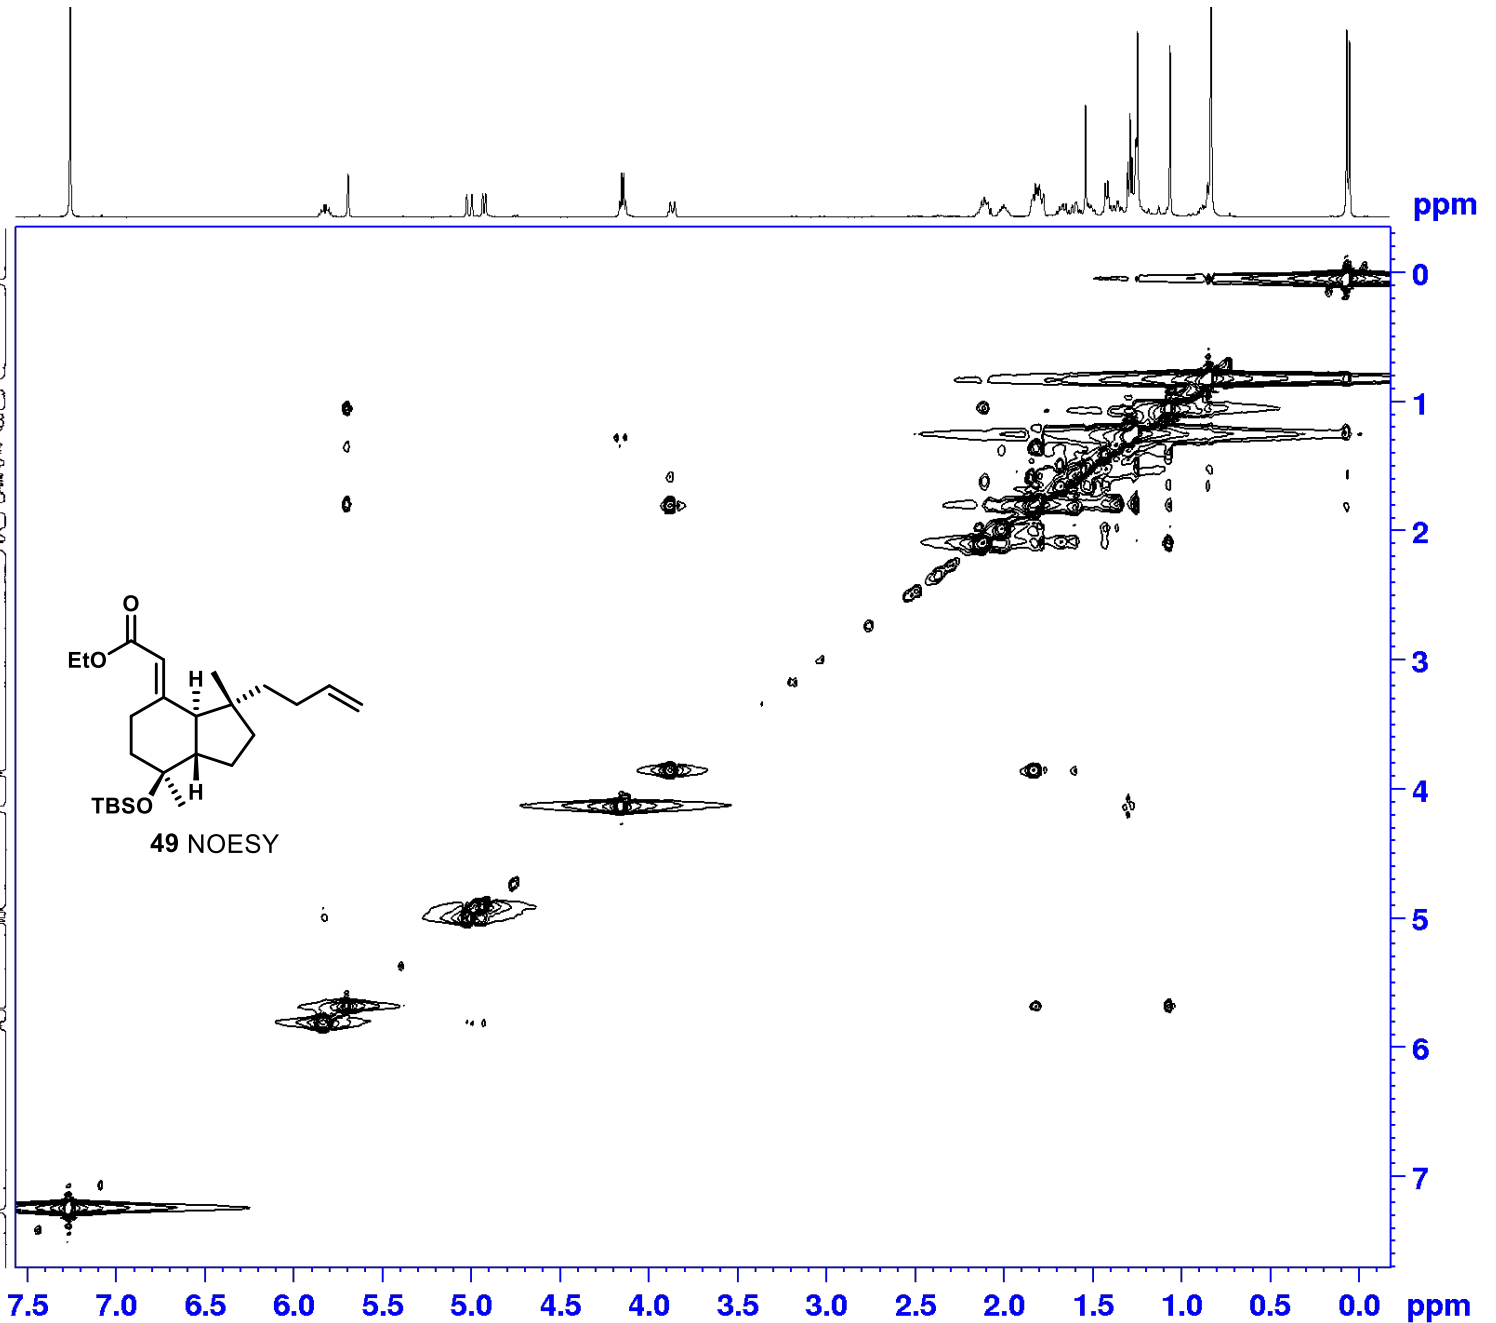

Current Data Parameters  
NAME JSCIV-142-f29-38-2  
EXPNO 1  
PROCNO 1

F2 - Acquisition Parameters  
Date\_ 20220609  
Time 13.55  
INSTRUM av600  
PROBHD 5 mm CPBBO BB-  
PULPROG zg30  
TD 98074  
SOLVENT CDC13  
NS 8  
DS 2  
SWH 9615.385 Hz  
FIDRES 0.098042 Hz  
AQ 5.0998478 sec  
RG 10  
DW 52.000 usec  
DE 14.23 usec  
TE 298.0 K  
D1 0.10000000 sec  
TD0 1

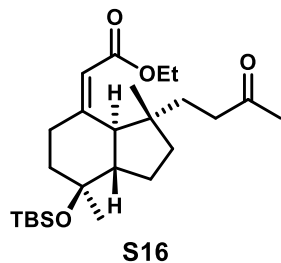

==== CHANNEL f1 =====  
SFO1 600.134209 MHz  
NUC1 1H  
P1 9.50 usec  
PLW1 30.00000000 W

F2 - Processing parameters  
SI 65536  
SF 600.1300351 MHz  
WDW EM  
SSB 0  
LB 0.30 Hz  
GB 0  
PC 1.00

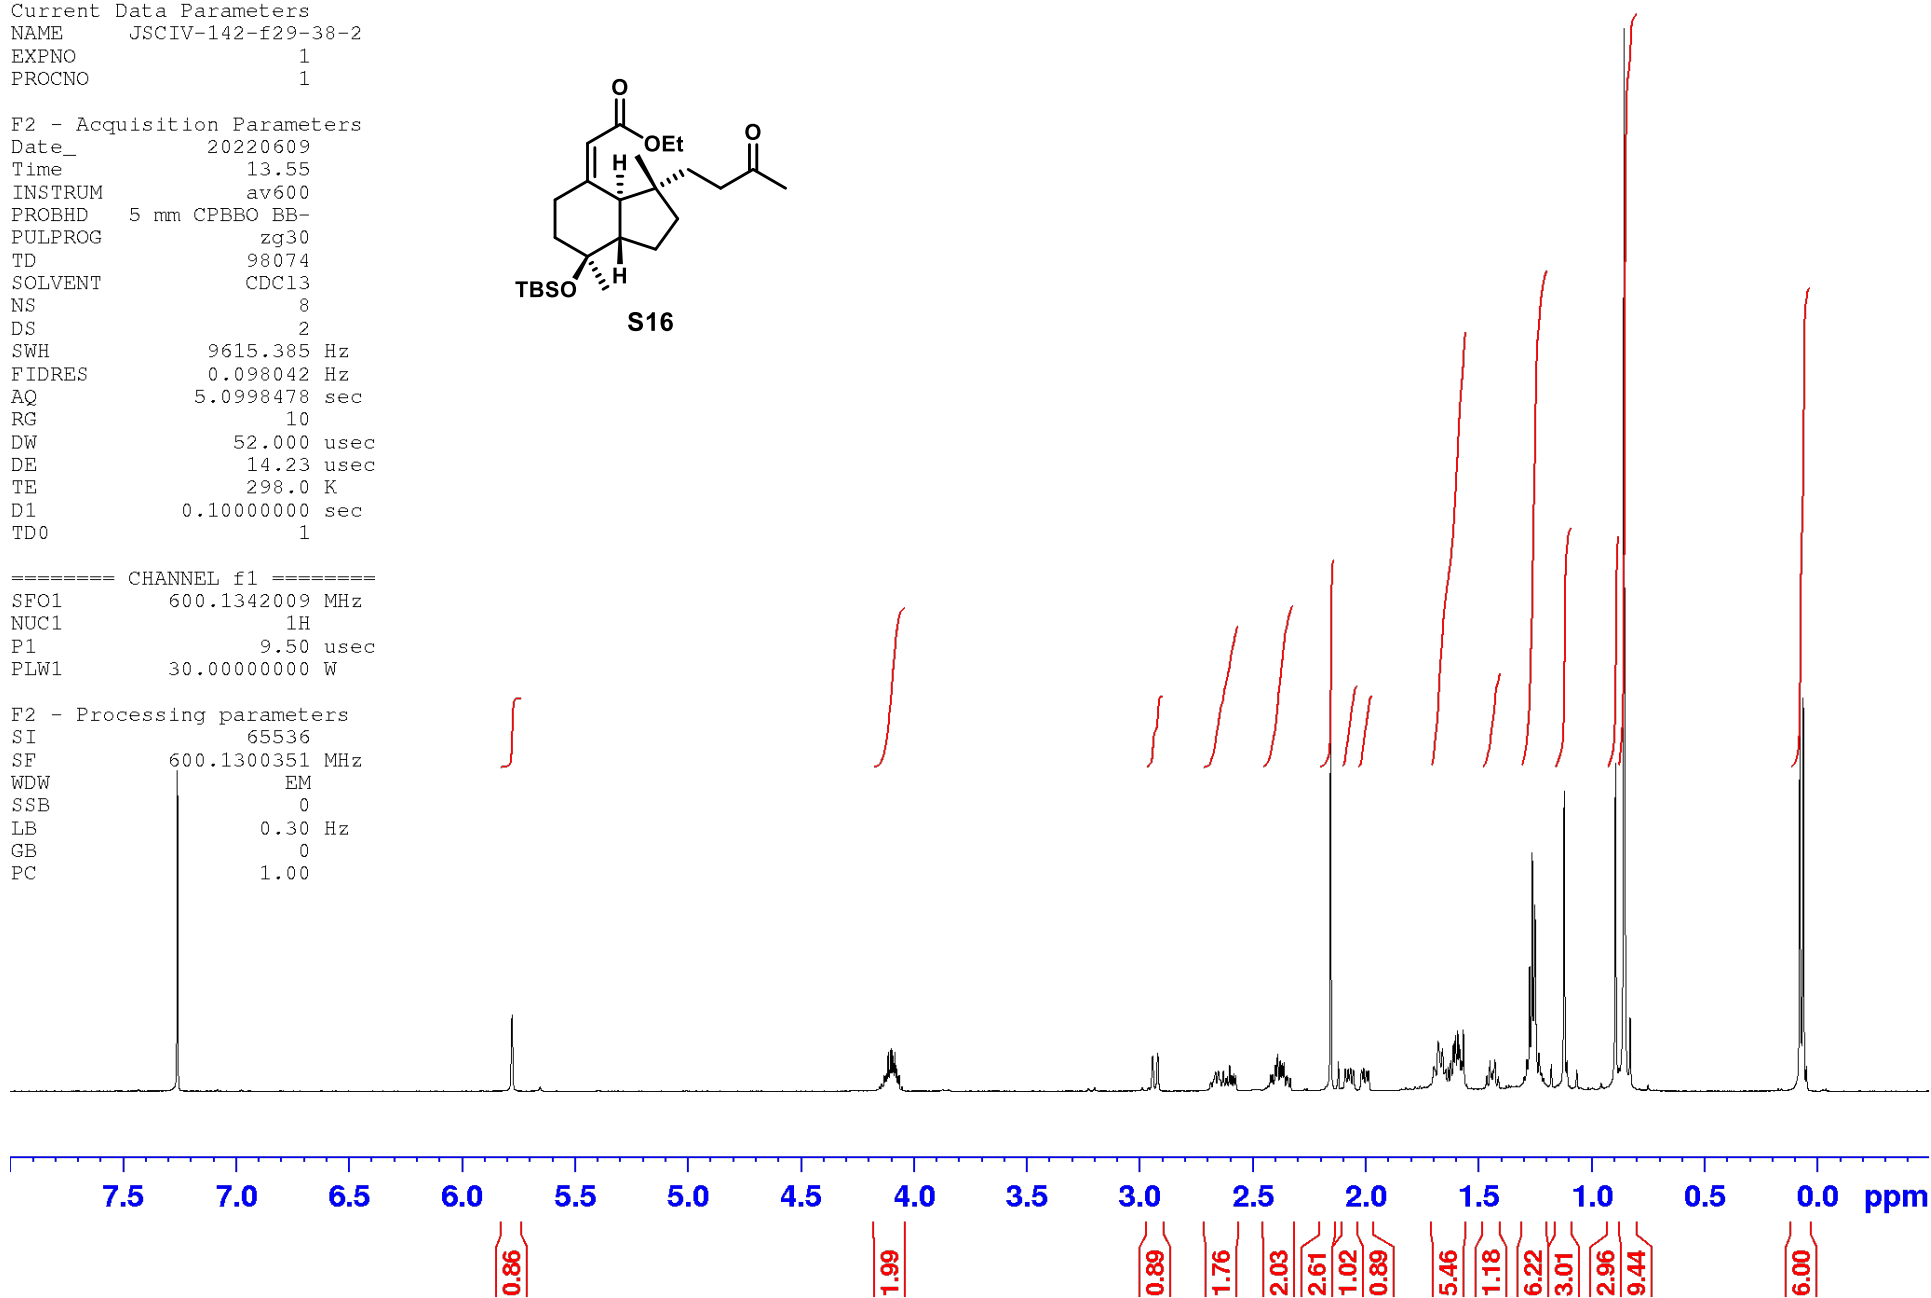

Current Data Parameters  
NAME JSCIV-142-f29-38-2  
EXPNO 2  
PROCNO 1

F2 - Acquisition Parameters  
Date\_ 20220609  
Time 13.56  
INSTRUM av600  
PROBHD 5 mm CPBBO BB-  
PULPROG zgdc30  
TD 65536  
SOLVENT CDCl3  
NS 65  
DS 4  
SWH 36231.883 Hz  
FIDRES 0.552855 Hz  
AQ 0.9043968 sec  
RG 2050  
DW 13.800 usec  
DE 19.63 usec  
TE 298.0 K  
D1 0.40000001 sec  
D11 0.03000000 sec  
TD0 1

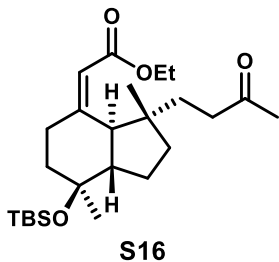

----- CHANNEL f1 -----  
SFO1 150.9194080 MHz  
NUC1 13C  
P1 10.10 usec  
PLW1 64.00000000 W

----- CHANNEL f2 -----  
SFO2 600.1330010 MHz  
NUC2 1H  
CPDPRG[2] waltz16  
PCPD2 80.00 usec  
PLW2 30.00000000 W  
PLW12 0.37154001 W

F2 - Processing parameters  
SI 65536  
SF 150.9027930 MHz  
WDW EM  
SSB 0  
LB 1.00 Hz  
GB 0  
PC 1.00

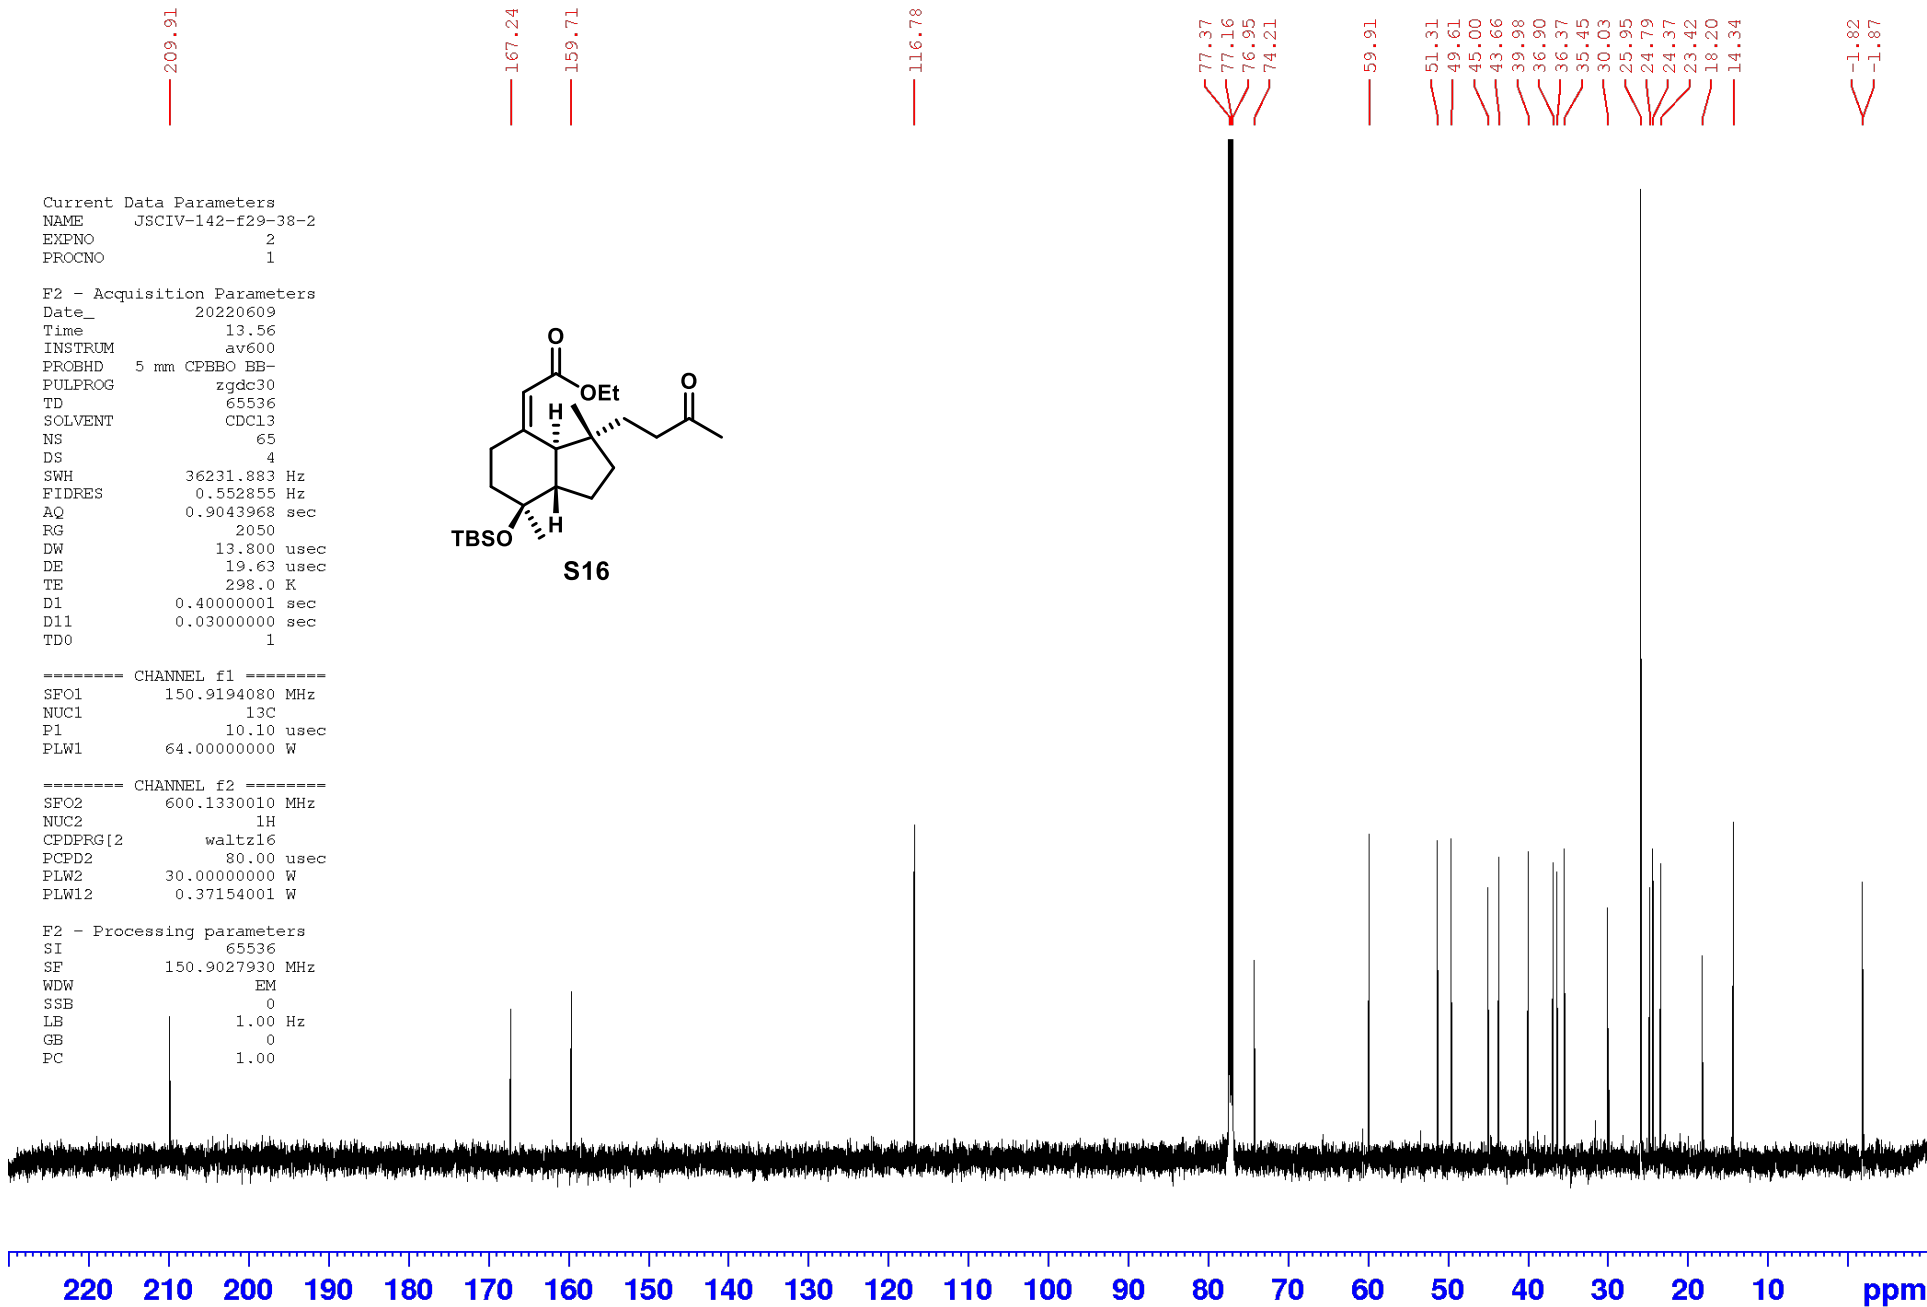

Current Data Parameters  
NAME JSCIV-142-f29-38-2  
EXPNO 5  
PROCNO 1

F2 - Acquisition Parameters  
Date\_ 20220609  
Time 14.04  
INSTRUM av600  
PROBHD 5 mm CPBBO BB-  
PULPROG cosygpgf  
TD 2048  
SOLVENT CDCl3  
NS 1  
DS 16  
SWH 9615.385 Hz  
FIDRES 4.695012 Hz  
AQ 0.1064960 sec  
RG 256  
DW 52.000 usec  
DE 10.00 usec  
TE 297.9 K  
DO 0.00000300 sec  
D1 1.48689198 sec  
D13 0.00000400 sec  
D16 0.00020000 sec  
IN0 0.00010400 sec

==== CHANNEL f1 =====  
SF01 600.1342009 MHz  
NUC1 1H  
P0 9.50 usec  
P1 9.50 usec  
PLW1 30.00000000 W

==== GRADIENT CHANNEL =====  
GPNAM[1] SMSQ10.100  
GPZ1 10.00 %  
P16 1000.00 usec

F1 - Acquisition parameters  
TD 256  
SF01 600.1342 MHz  
FIDRES 75.120193 Hz  
SW 16.022 ppm  
FnMODE QF

F2 - Processing parameters  
SI 1024  
SF 600.1300339 MHz  
WDW SINE  
SSB 0  
LB 0 Hz  
GB 0  
PC 1.00

F1 - Processing parameters  
SI 1024  
MC2 QF  
SF 600.1300349 MHz  
WDW SINE  
SSB 0  
LB 0 Hz  
GB 0

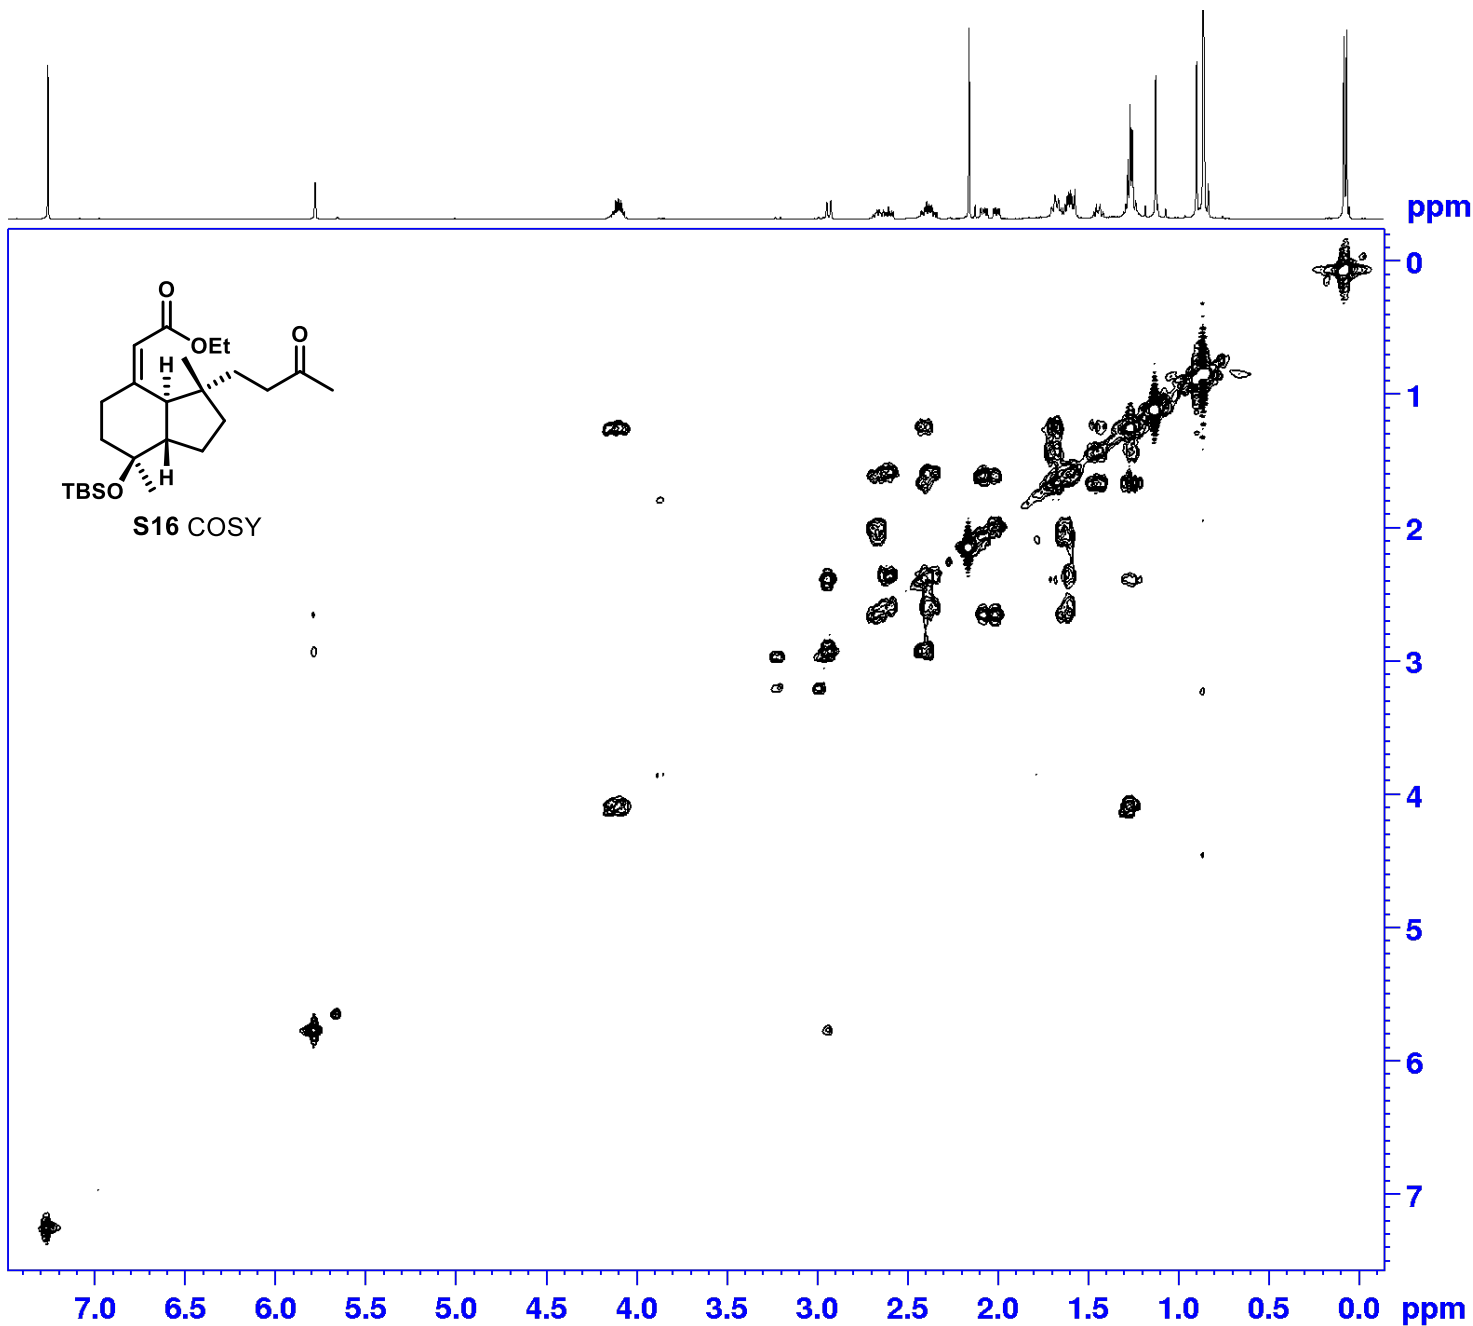

Current Data Parameters  
NAME JSCIV-142-E29-38-2  
EXPNO 4  
PROCNO 1

F2 - Acquisition Parameters  
Date\_ 20220609  
Time 14.52  
INSTRUM av600  
PROBHD 5 mm CPBBO BB-  
PULPROG hsqcetgppp.2  
TD 1024  
SOLVENT cdcl3  
NS 2  
DS 16  
SWH 9615.385 Hz  
FIDRES 9.390024 Hz  
AQ 0.0532480 sec  
RG 2050  
DW 52.000 usec  
DE 10.00 usec  
TE 297.9 K  
CNST2 145.0000000  
DO 0.00000300 sec  
D1 1.10000002 sec  
D4 0.00172414 sec  
D11 0.03000000 sec  
D16 0.00020000 sec  
IND 0.00001380 sec  
ZGPGTNS

===== CHANNEL f1 =====  
SFO1 600.1342009 MHz  
NUC1 1H  
P1 10.00 usec  
P2 20.00 usec  
P28 1000.00 usec  
PLW1 30.00000000 W

===== CHANNEL f2 =====  
SFO2 150.9194083 MHz  
NUC2 13C  
CPDPRG[2] gsrp  
P3 10.10 usec  
P14 500.00 usec  
P24 2000.00 usec  
PCPD2 65.00 usec  
PLW0 0 W  
PLW2 64.00000000 W  
PLW12 1.47909999 W  
SPNAM[3] Crp60,0.5,20.1  
SFOAL3 0.500  
SPOFFS3 0 Hz  
SPW3 10.00000000 W  
SPNAM[7] Crp60comp.4  
SFOAL7 0.500  
SPOFFS7 0 Hz  
SPW7 10.00000000 W

===== GRADIENT CHANNEL =====  
GPNAM[1] SMSQ10.100  
GPNAM[2] SMSQ10.100  
GPZ1 80.00 %  
GPZ2 20.10 %  
P16 1000.00 usec

F1 - Acquisition parameters  
TD 256  
SFO1 150.9194 MHz  
FIDRES 283.061564 Hz  
SW 240.074 ppm  
FaMODE Echo-Antiecho

F2 - Processing parameters  
SI 1024  
SF 600.1300325 MHz  
WDW EM  
SSB 0  
LB 5.00 Hz  
GB 0  
PC 1.00

F1 - Processing parameters  
SI 1024  
MC2 echo-antiecho  
SF 150.9028166 MHz  
WDW QSINE  
SSB 3  
LB 0 Hz  
GB 0

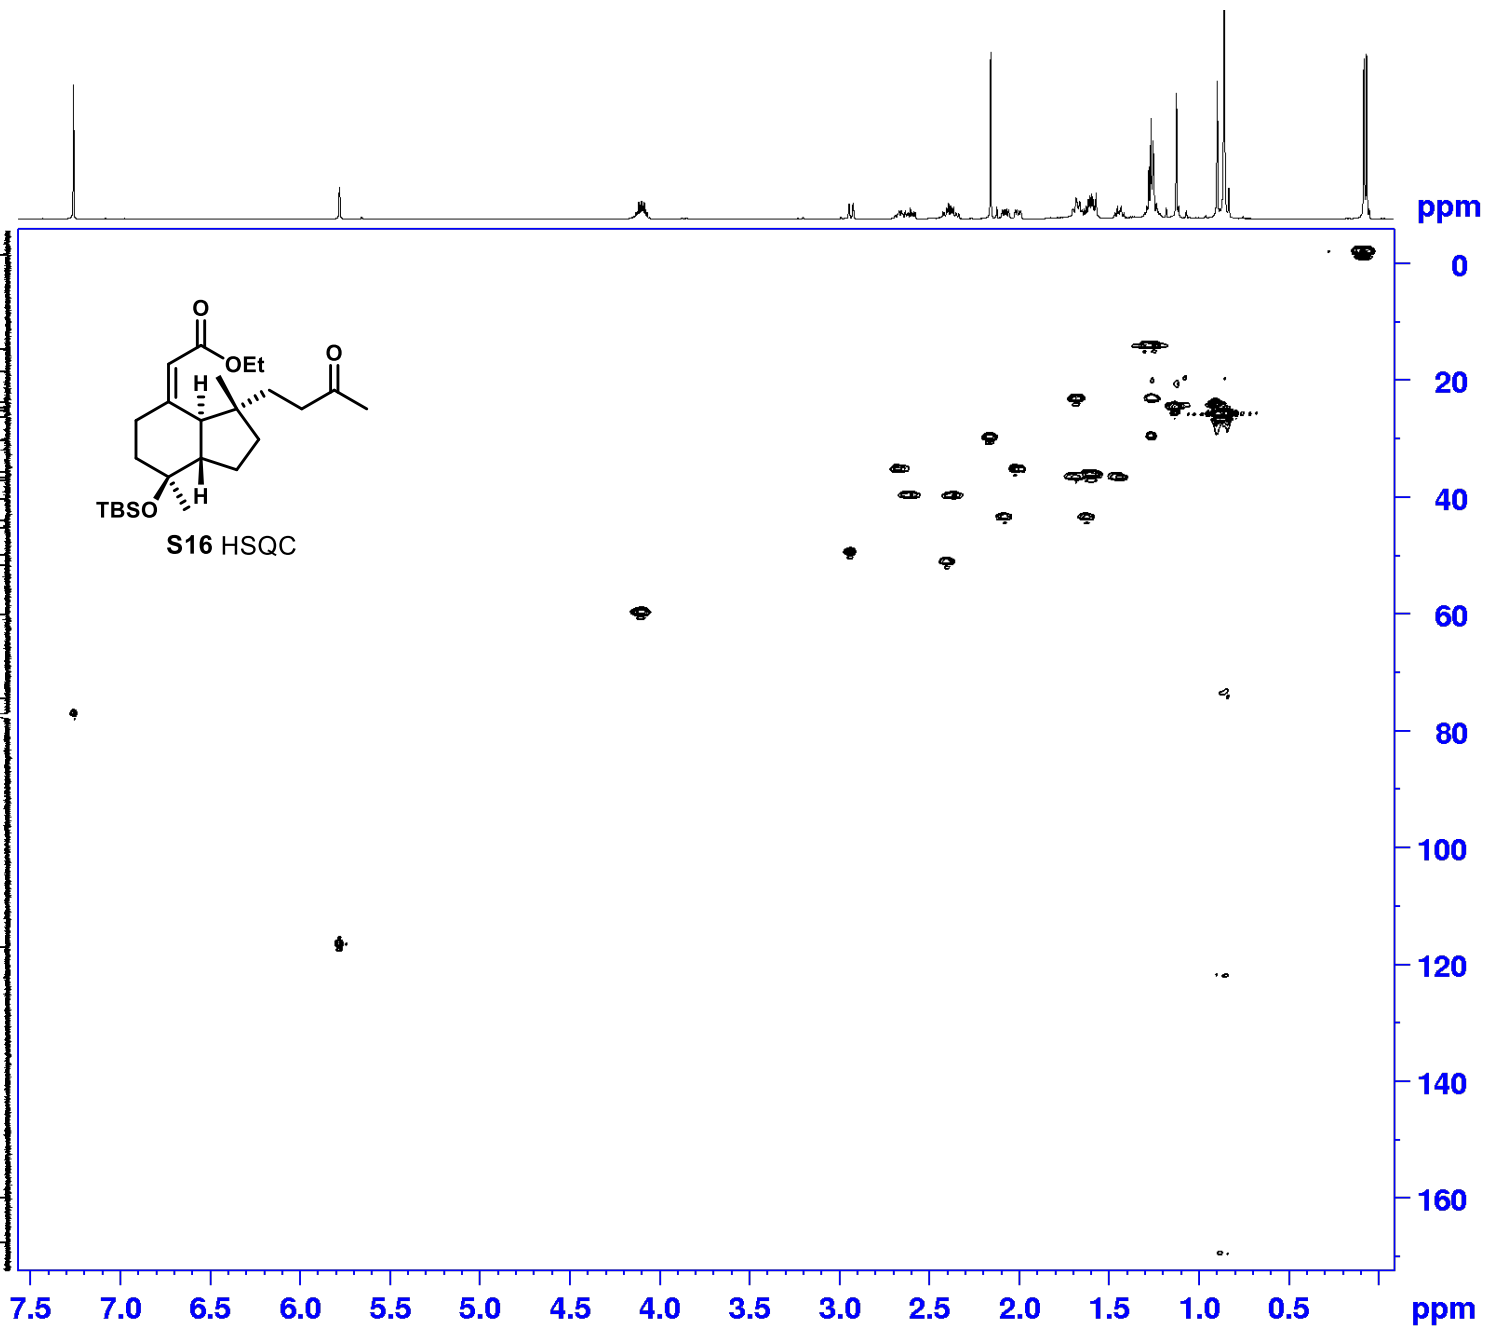

Current Data Parameters  
NAME J8CIV-142-f29-38-2  
EXPNO 6  
PROCNO 1

F2 - Acquisition Parameters  
Date\_ 20220609  
Time 14.12  
INSTRUM av600  
PROBHD 5 mm CPBBO BB-  
PULPROG hmbcgp1pndqf  
TD 4096  
SOLVENT CDCl3  
NS 2  
DS 16  
SWH 9615.385 Hz  
FIDRES 2.347506 Hz  
AQ 0.2129920 sec  
RG 2050  
DW 52.000 usec  
DE 10.00 usec  
TE 298.0 K  
CNST2 145.0000000  
CNST3 10.0000000  
D0 0.00000390 sec  
D1 1.10000002 sec  
D2 0.00344828 sec  
D6 0.05000000 sec  
D16 0.00020000 sec  
IN0 0.00001380 sec

----- CHANNEL f1 -----  
SFO1 600.1342009 MHz  
NUC1 1H  
P1 9.50 usec  
P2 19.00 usec  
PLW1 30.00000000 W

----- CHANNEL f2 -----  
SFO2 150.9194083 MHz  
NUC2 13C  
P3 10.10 usec  
PLW2 64.00000000 W

----- GRADIENT CHANNEL -----  
GPNAM[1] SMSQ10.100  
GPNAM[2] SMSQ10.100  
GPNAM[3] SMSQ10.100  
GPZ1 50.00 %  
GPZ2 30.00 %  
GPZ3 40.10 %  
P16 1000.00 usec

F1 - Acquisition parameters  
TD 256  
SFO1 150.9194 MHz  
FIDRES 283.061584 Hz  
SW 240.074 ppm  
FnMODE QF

F2 - Processing parameters  
SI 2048  
SF 600.1300335 MHz  
WDW SINE  
SSB 0  
LB 0 Hz  
GB 0  
PC 1.00

F1 - Processing parameters  
SI 1024  
MC2 QF  
SF 150.9028115 MHz  
WDW SINE  
SSB 0  
LB 0 Hz  
GB 0

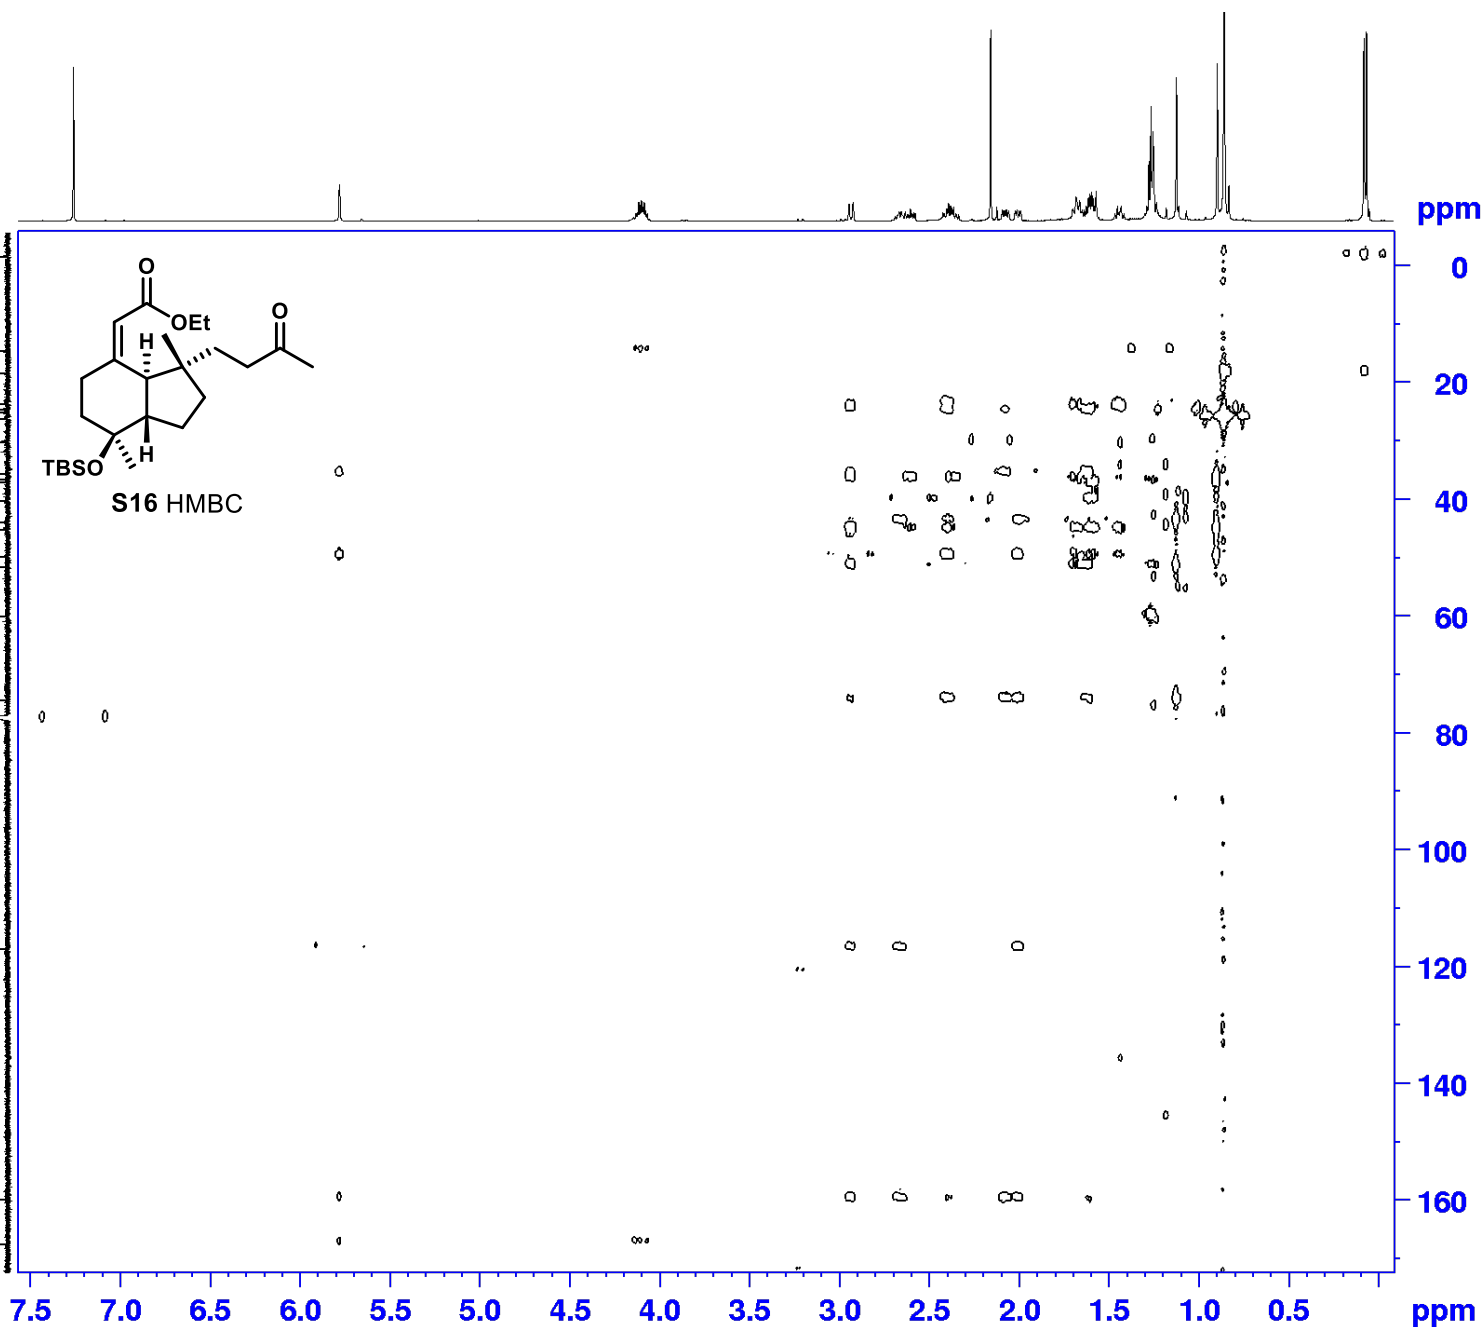

Current Data Parameters  
NAME JSCIV-142-f29-38-2  
EXPNO 7  
PROCNO 1

F2 - Acquisition Parameters  
Date\_ 20220609  
Time 14.24  
INSTRUM av600  
PROBHD 5 mm CPBBO BB-  
PULPROG noesygp  
TD 2048  
SOLVENT CDCl3  
NS 2  
DS 16  
SWH 9615.385 Hz  
FIDRES 4.695012 Hz  
AQ 0.1064960 sec  
RG 57  
DW 52.000 usec  
DE 16.68 usec  
TE 297.9 K  
DO 0.00003990 sec  
D1 2.00000000 sec  
D8 1.00000000 sec  
D16 0.00020000 sec  
IN0 0.00010400 sec

==== CHANNEL f1 =====  
SF01 600.1342009 MHz  
NUC1 1H  
P1 9.50 usec  
P2 19.00 usec  
PLW1 30.00000000 W

==== GRADIENT CHANNEL =====  
GPNAM[1] SMSQ10.100  
GPZ1 40.00 %  
P16 1000.00 usec

F1 - Acquisition parameters  
TD 256  
SF01 600.1342 MHz  
FIDRES 75.120193 Hz  
SW 16.022 ppm  
FnMODE States-TPPI

F2 - Processing parameters  
SI 1024  
SF 600.1300355 MHz  
WDW QSINE  
SSB 2  
LB 0 Hz  
GB 0  
PC 1.00

F1 - Processing parameters  
SI 1024  
MC2 States-TPPI  
SF 600.1300355 MHz  
WDW QSINE  
SSB 2  
LB 0 Hz  
GB 0

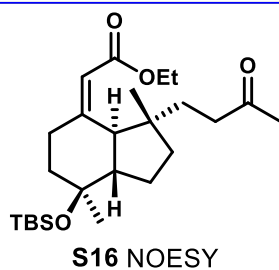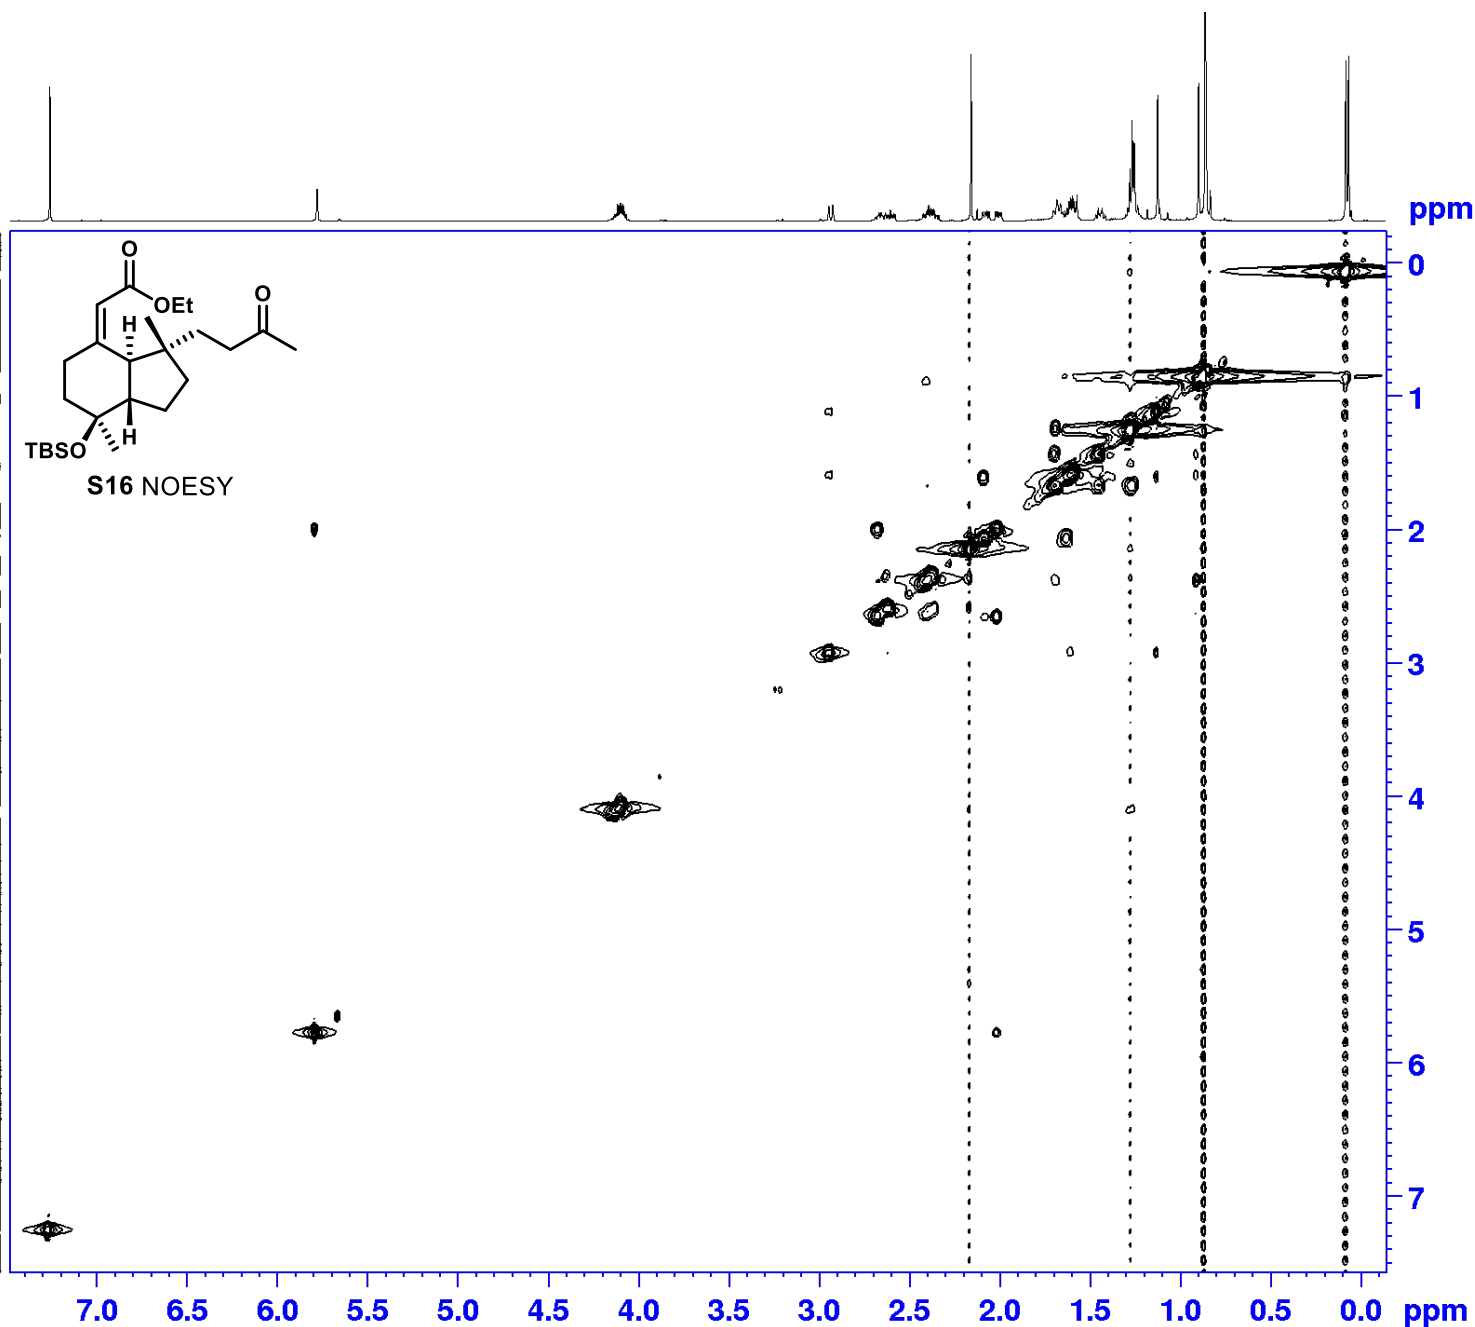

Current Data Parameters  
NAME JSCIV-142-f44-60  
EXPNO 1  
PROCNO 1

F2 - Acquisition Parameters

Date\_ 20210730  
Time 20.24  
INSTRUM av600  
PROBHD 5 mm CPBBO BB-  
PULPROG zg30  
TD 48074  
SOLVENT CDC13  
NS 16  
DS 2  
SWH 9615.385 Hz  
FIDRES 0.200012 Hz  
AQ 2.4998479 sec  
RG 10  
DW 52.000 usec  
DE 14.23 usec  
TE 298.0 K  
D1 4.00000000 sec  
TD0 1

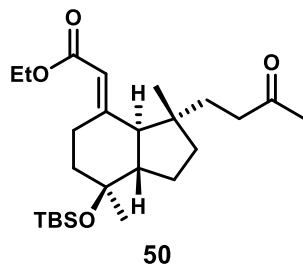

==== CHANNEL f1 =====

SFO1 600.134209 MHz  
NUC1 1H  
P1 9.50 usec  
PLW1 30.00000000 W

F2 - Processing parameters

SI 65536  
SF 600.1300346 MHz  
WDW EM  
SSB 0  
LB 0.30 Hz  
GB 0  
PC 1.00

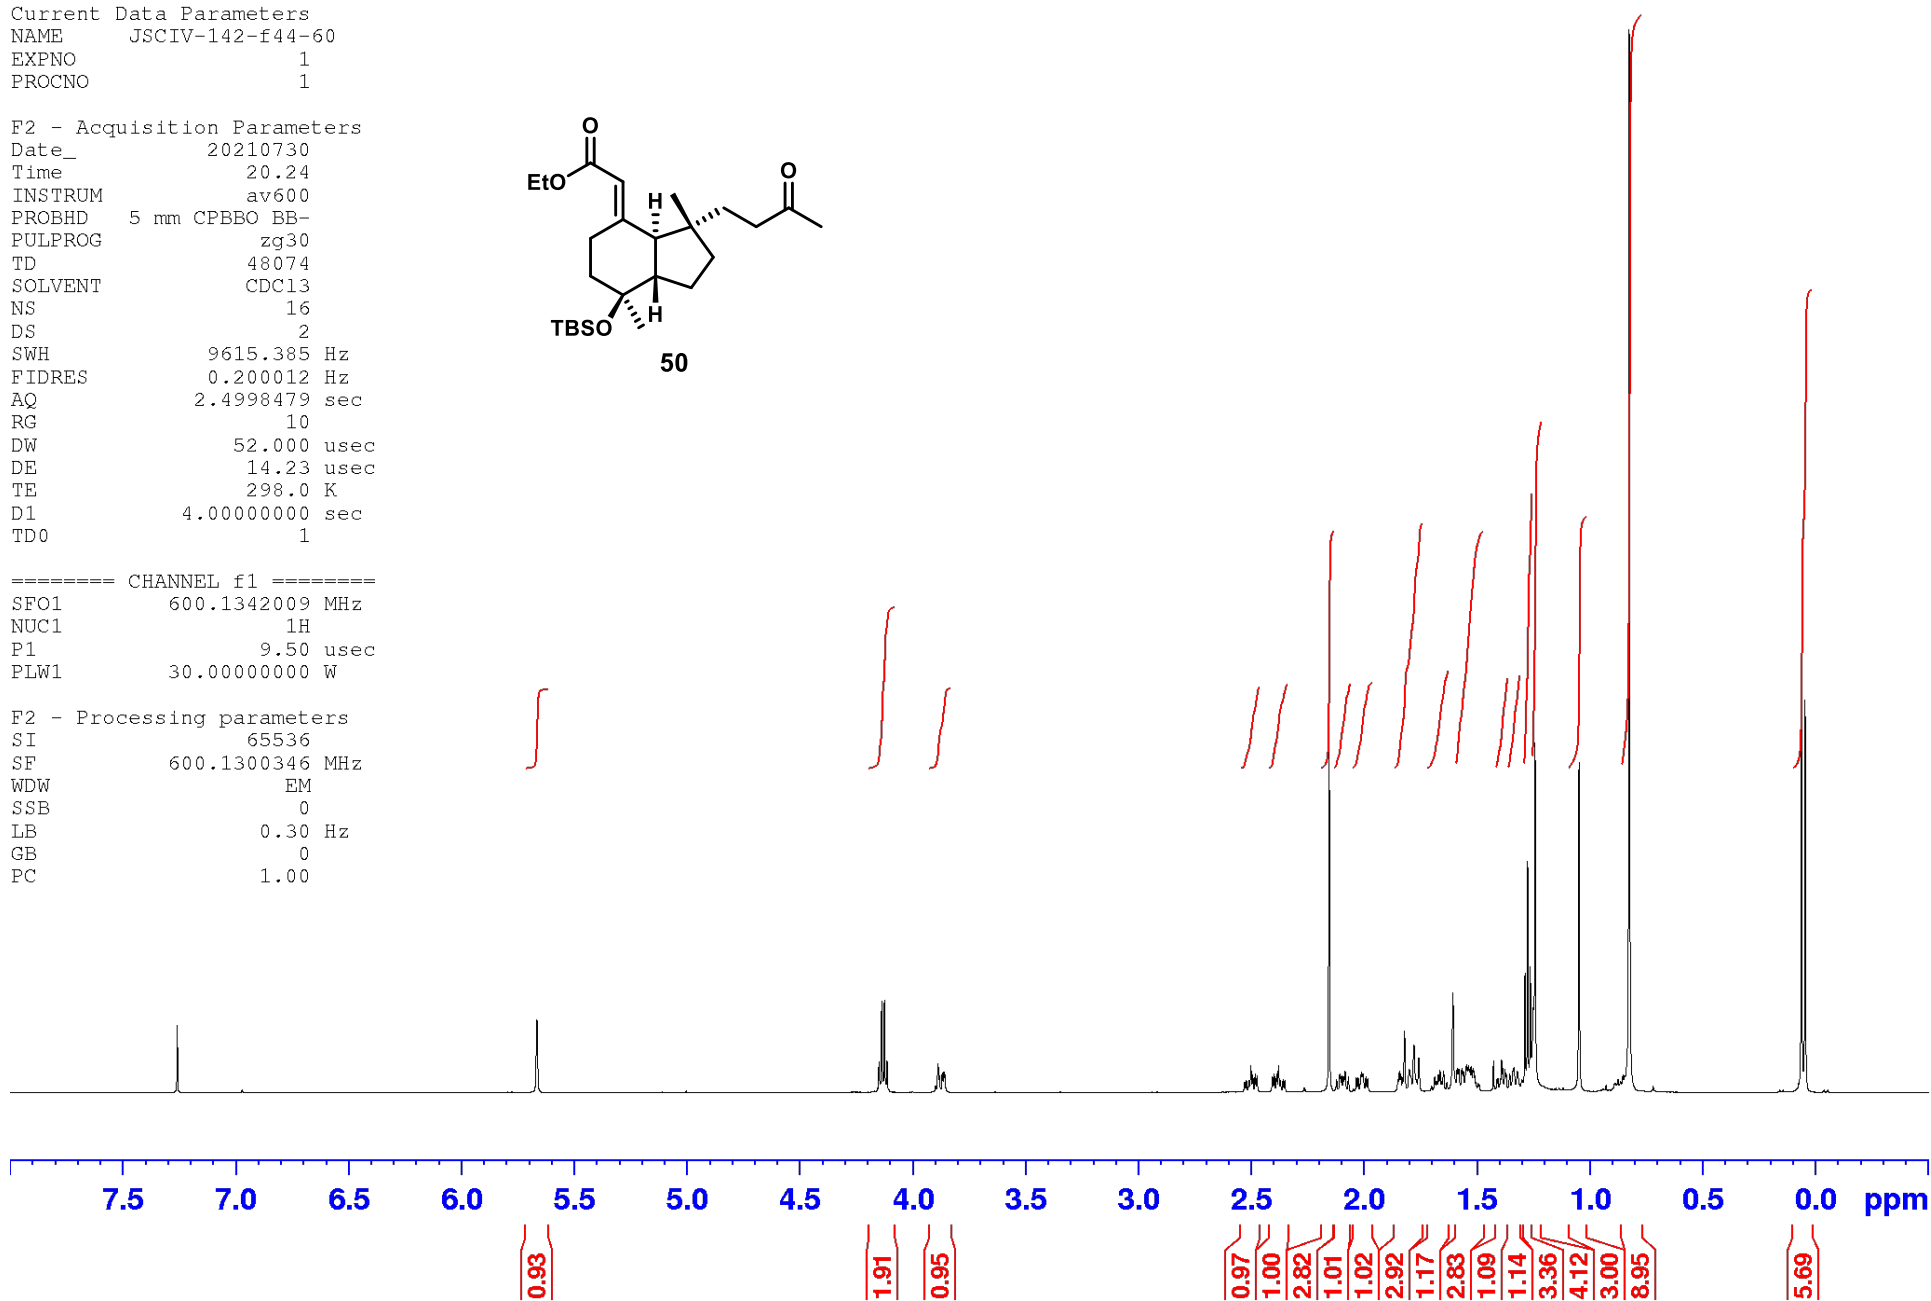



Current Data Parameters  
NAME JSCIV-142-f44-60-2  
EXPNO 2  
PROCNO 1

F2 - Acquisition Parameters  
Date\_ 20220613  
Time 16.32  
INSTRUM av600  
PROBHD 5 mm CPBBO BB-  
PULPROG zgdc30  
TD 65536  
SOLVENT CDCL3  
NS 80  
DS 4  
SWH 36231.883 Hz  
FIDRES 0.552855 Hz  
AQ 0.9043968 sec  
RG 2050  
DW 13.800 usec  
DE 19.63 usec  
TE 298.0 K  
D1 0.4000001 sec  
D11 0.03000000 sec  
TDO 1

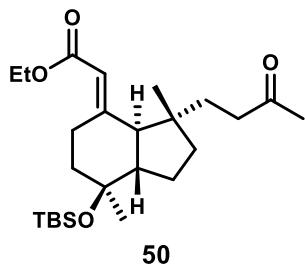

----- CHANNEL f1 -----  
SFO1 150.9194080 MHz  
NUC1 13C  
P1 10.10 usec  
PLW1 64.00000000 W

----- CHANNEL f2 -----  
SFO2 600.1330010 MHz  
NUC2 1H  
CPDPRG[2] waltz16  
PCPD2 80.00 usec  
PLW2 30.00000000 W  
PLW12 0.37154001 W

F2 - Processing parameters  
SI 65536  
SF 150.9027936 MHz  
WDW EM  
SSB 0  
LB 1.00 Hz  
GB 0  
PC 1.00

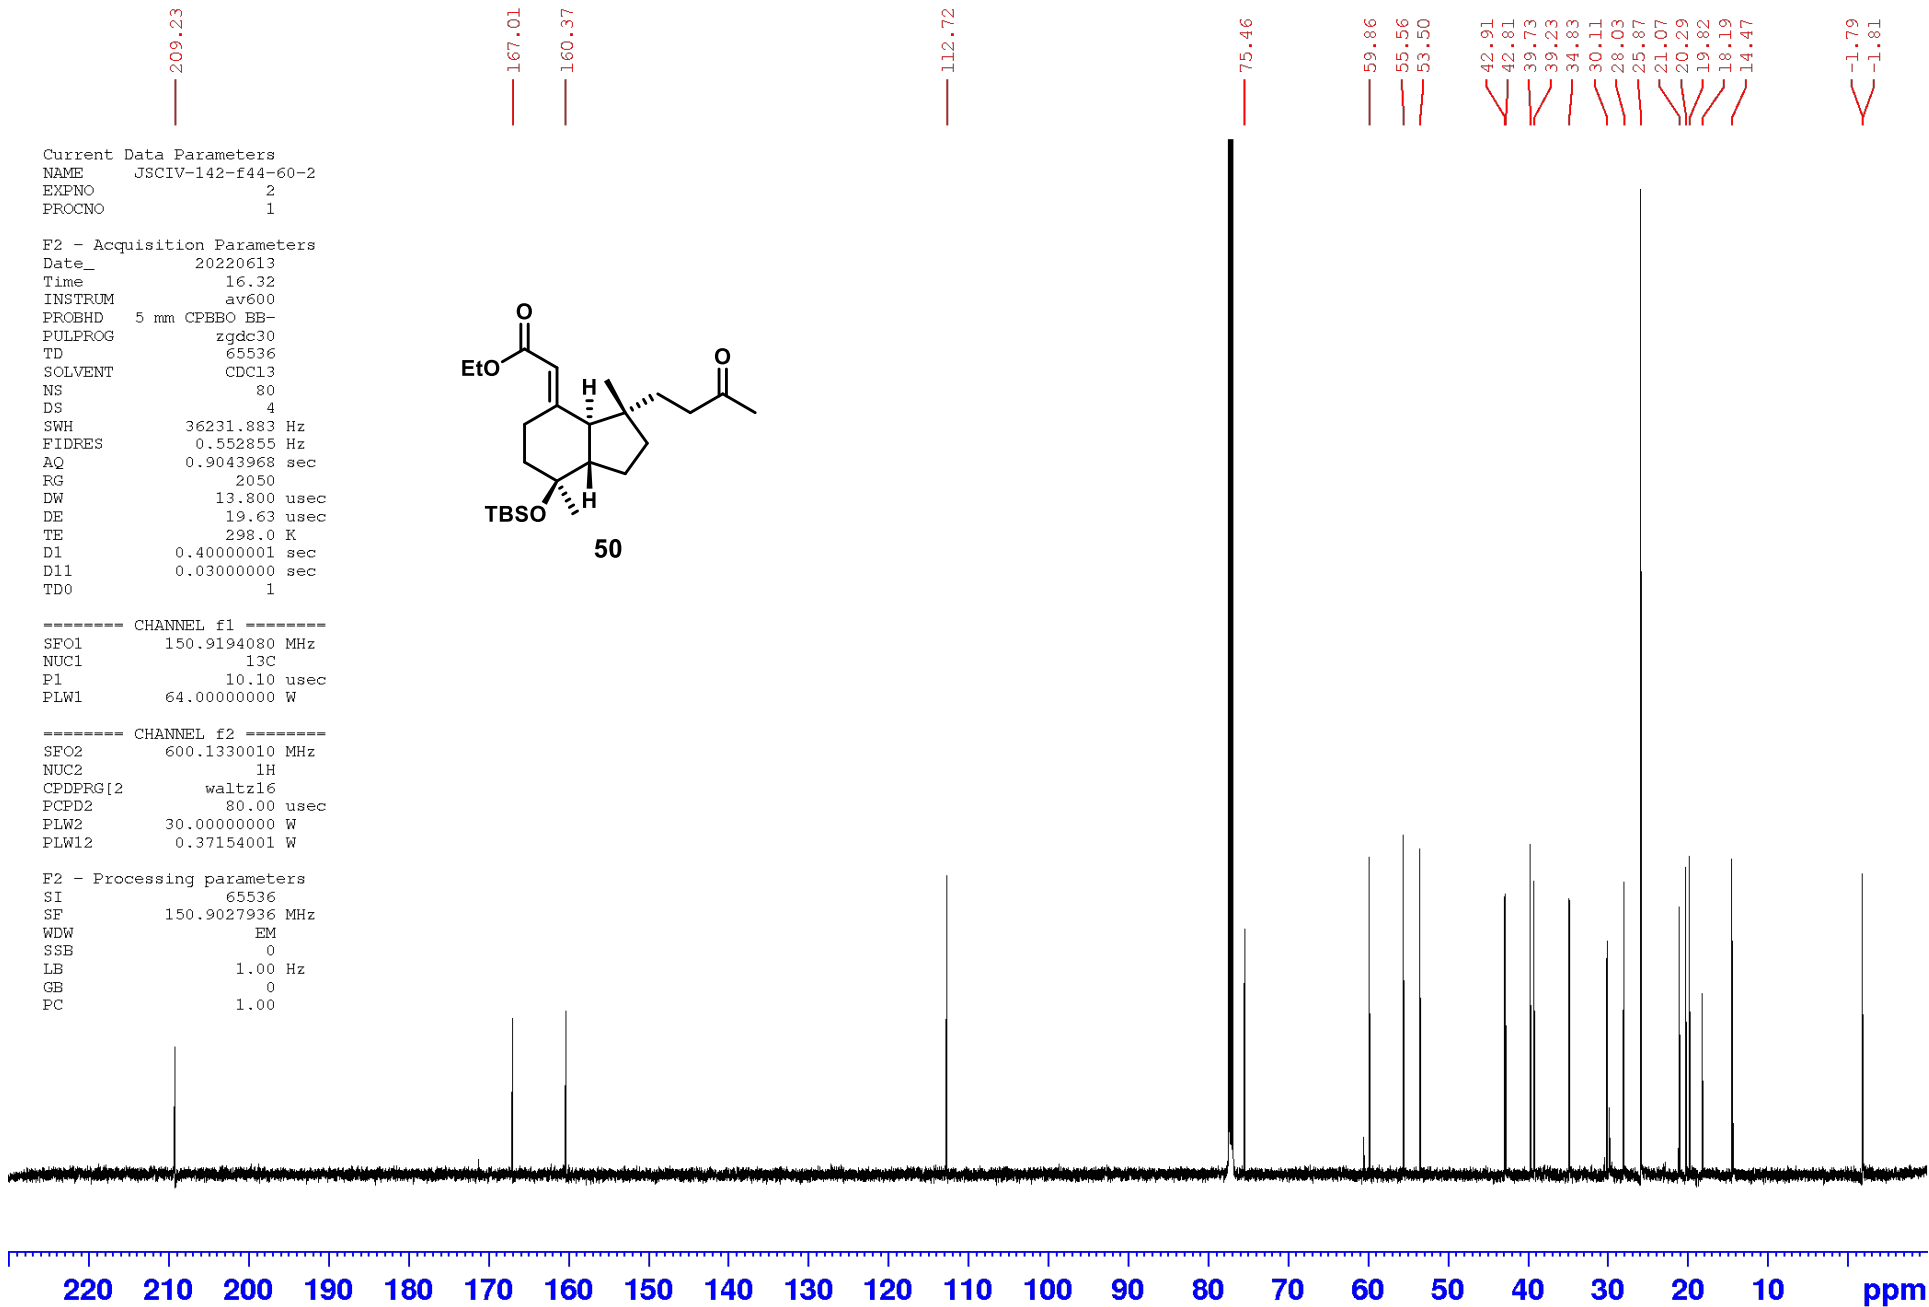

Current Data Parameters  
NAME JSCIV-142-f44-60-2  
EXPNO 5  
PROCNO 1

F2 - Acquisition Parameters  
Date\_ 20220613  
Time 16.49  
INSTRUM av500  
PROBHD 5 mm CPBBO BB-  
PULPROG cosygpgf  
TD 2048  
SOLVENT CDCl3  
NS 1  
DS 16  
SWH 9615.385 Hz  
FIDRES 4.695012 Hz  
AQ 0.1064960 sec  
RG 114  
DW 52.000 usec  
DE 10.00 usec  
TE 298.0 K  
DO 0.00000300 sec  
D1 1.48689198 sec  
D13 0.00000490 sec  
D16 0.00020000 sec  
IN0 0.00010400 sec

----- CHANNEL f1 -----  
SF01 600.1342009 MHz  
NUC1 1H  
P0 9.50 usec  
P1 9.50 usec  
PLW1 30.00000000 W

===== GRADIENT CHANNEL =====  
GPNAM[1] SMSQ10.100  
GP21 10.00 %  
P16 1000.00 usec

F1 - Acquisition parameters  
TD 256  
SF01 600.1342 MHz  
FIDRES 75.120193 Hz  
SW 16.022 ppm  
FnMODE QF

F2 - Processing parameters  
SI 1024  
SF 600.1300336 MHz  
WDW SINE  
SSB 0  
LB 0 Hz  
GB 0  
PC 1.00

F1 - Processing parameters  
SI 1024  
MC2 QF  
SF 600.1300372 MHz  
WDW SINE  
SSB 0  
LB 0 Hz  
GB 0

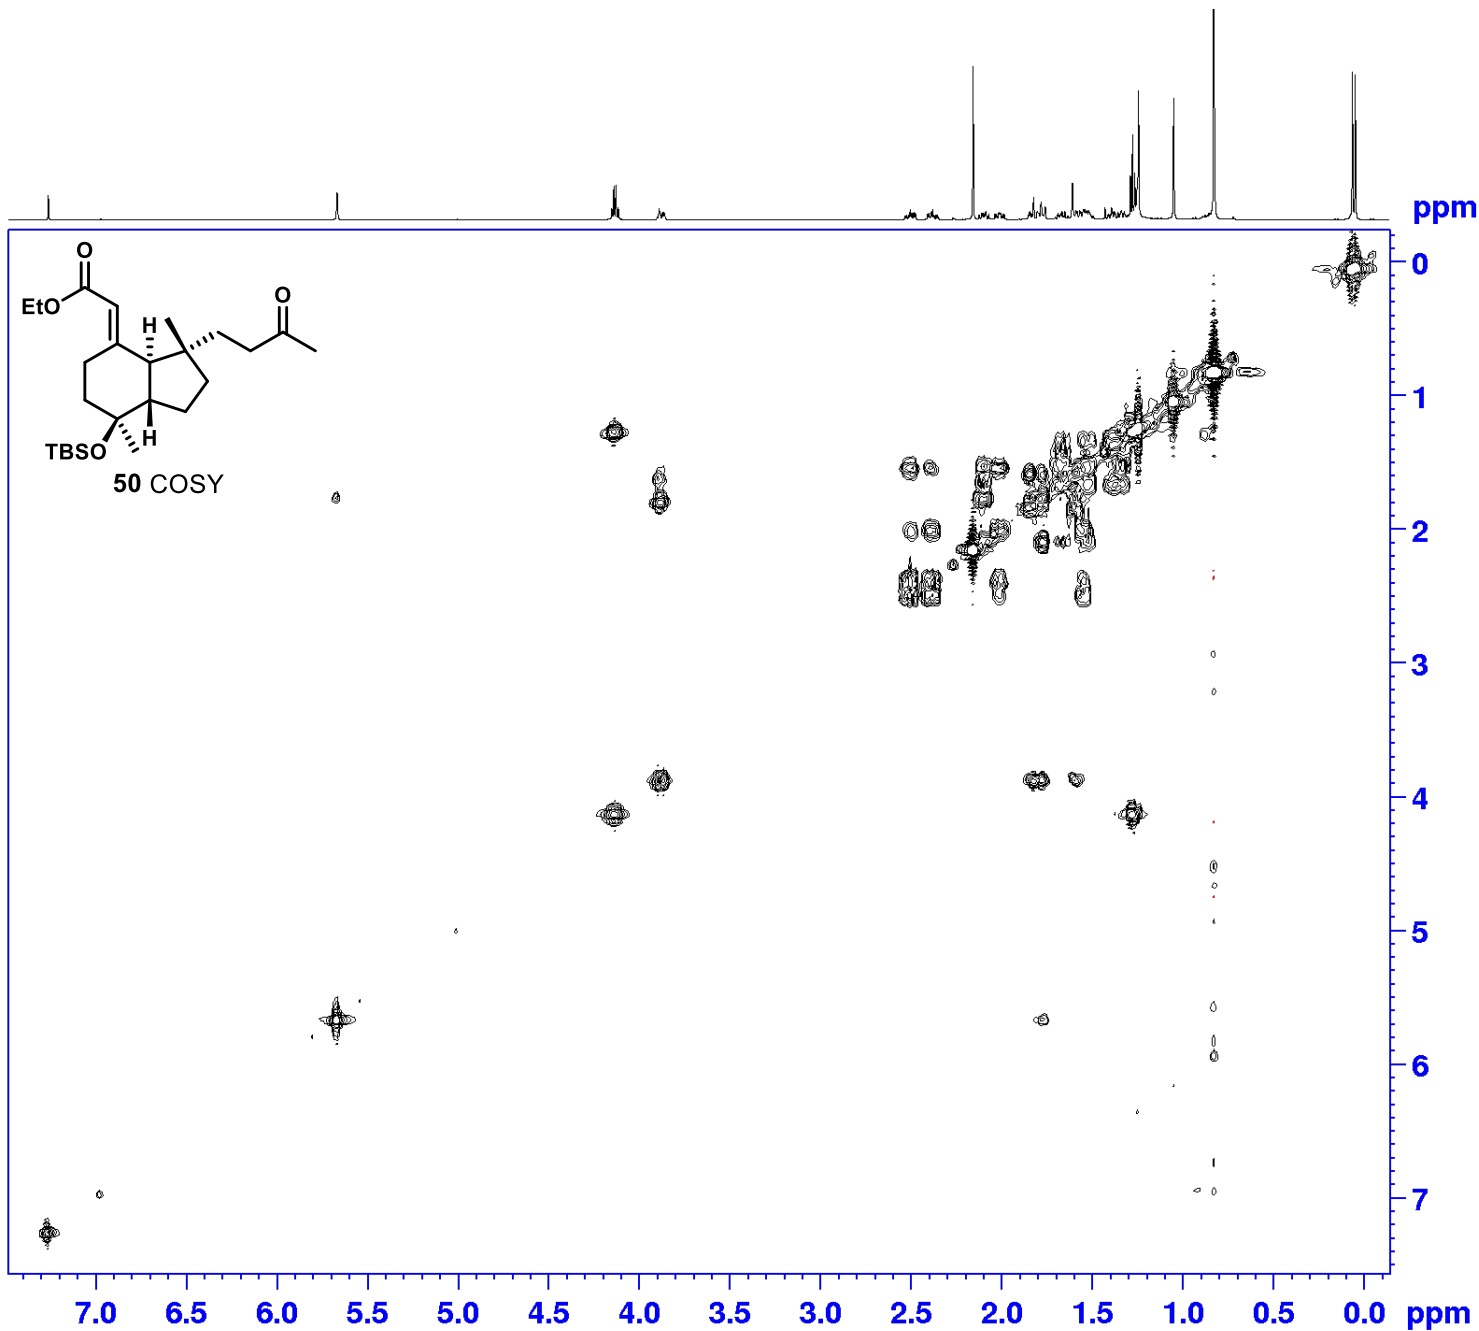

Current Data Parameters  
NAME JSCIV-142-E44-G0-2  
EXPNO 4  
PROCNO 1

F2 - Acquisition Parameters  
Date\_ 20220613  
Time 16.39  
INSTRUM av600  
PROBHD 5 mm CPBBO BB-  
PULPROG hsqcetppp.2  
TD 1024  
SOLVENT cdcl3  
NS 2  
DS 16  
SWH 9615.385 Hz  
FIDRES 9.390024 Hz  
AQ 0.0532480 sec  
RG 2050  
DW 52.000 usec  
DE 10.00 usec  
TE 297.9 K  
CNS2 145.0000000  
DO 0.0000300 sec  
D1 1.1000002 sec  
D4 0.00172414 sec  
D11 0.03000000 sec  
D16 0.00020000 sec  
IND 0.00001380 sec  
ZGPGNS

\*\*\*\*\* CHANNEL f1 \*\*\*\*\*  
SFO1 600.1342009 MHz  
NUC1 1H  
P1 10.00 usec  
P2 20.00 usec  
P28 1000.00 usec  
PLW1 30.00000000 W

\*\*\*\*\* CHANNEL f2 \*\*\*\*\*  
SFO2 150.9194083 MHz  
NUC2 13C  
CPDPRG[2] gsrp  
P3 10.10 usec  
P14 500.00 usec  
P24 2000.00 usec  
PCPD2 65.00 usec  
PLW0 0 W  
PLW2 64.00000000 W  
PLW12 1.47909999 W  
SPNAM[3] Crp60,0.5,20.1  
SFOAL3 0.500  
SPOFFS3 0 Hz  
SPW3 10.00000000 W  
SPNAM[7] Crp60comp.4  
SFOAL7 0.500  
SPOFFS7 0 Hz  
SPW7 10.00000000 W

\*\*\*\*\* GRADIENT CHANNEL \*\*\*\*\*  
GPNM[1] SMSQ10.100  
GPNM[2] SMSQ10.100  
GPZ1 80.00 %  
GPZ2 20.10 %  
P16 1000.00 usec

F1 - Acquisition parameters  
TD 256  
SFO1 150.9194 MHz  
FIDRES 283.061564 Hz  
SW 240.074 ppm  
PaMODE Echo-Antiecho

F2 - Processing parameters  
SI 1024  
SF 600.1300321 MHz  
WDW EM  
SSB 0  
LB 5.00 Hz  
GB 0  
PC 1.00

F1 - Processing parameters  
SI 1024  
MC2 echo-antiecho  
SF 150.9028034 MHz  
WDW QSINE  
SSB 3  
LB 0 Hz  
GB 0

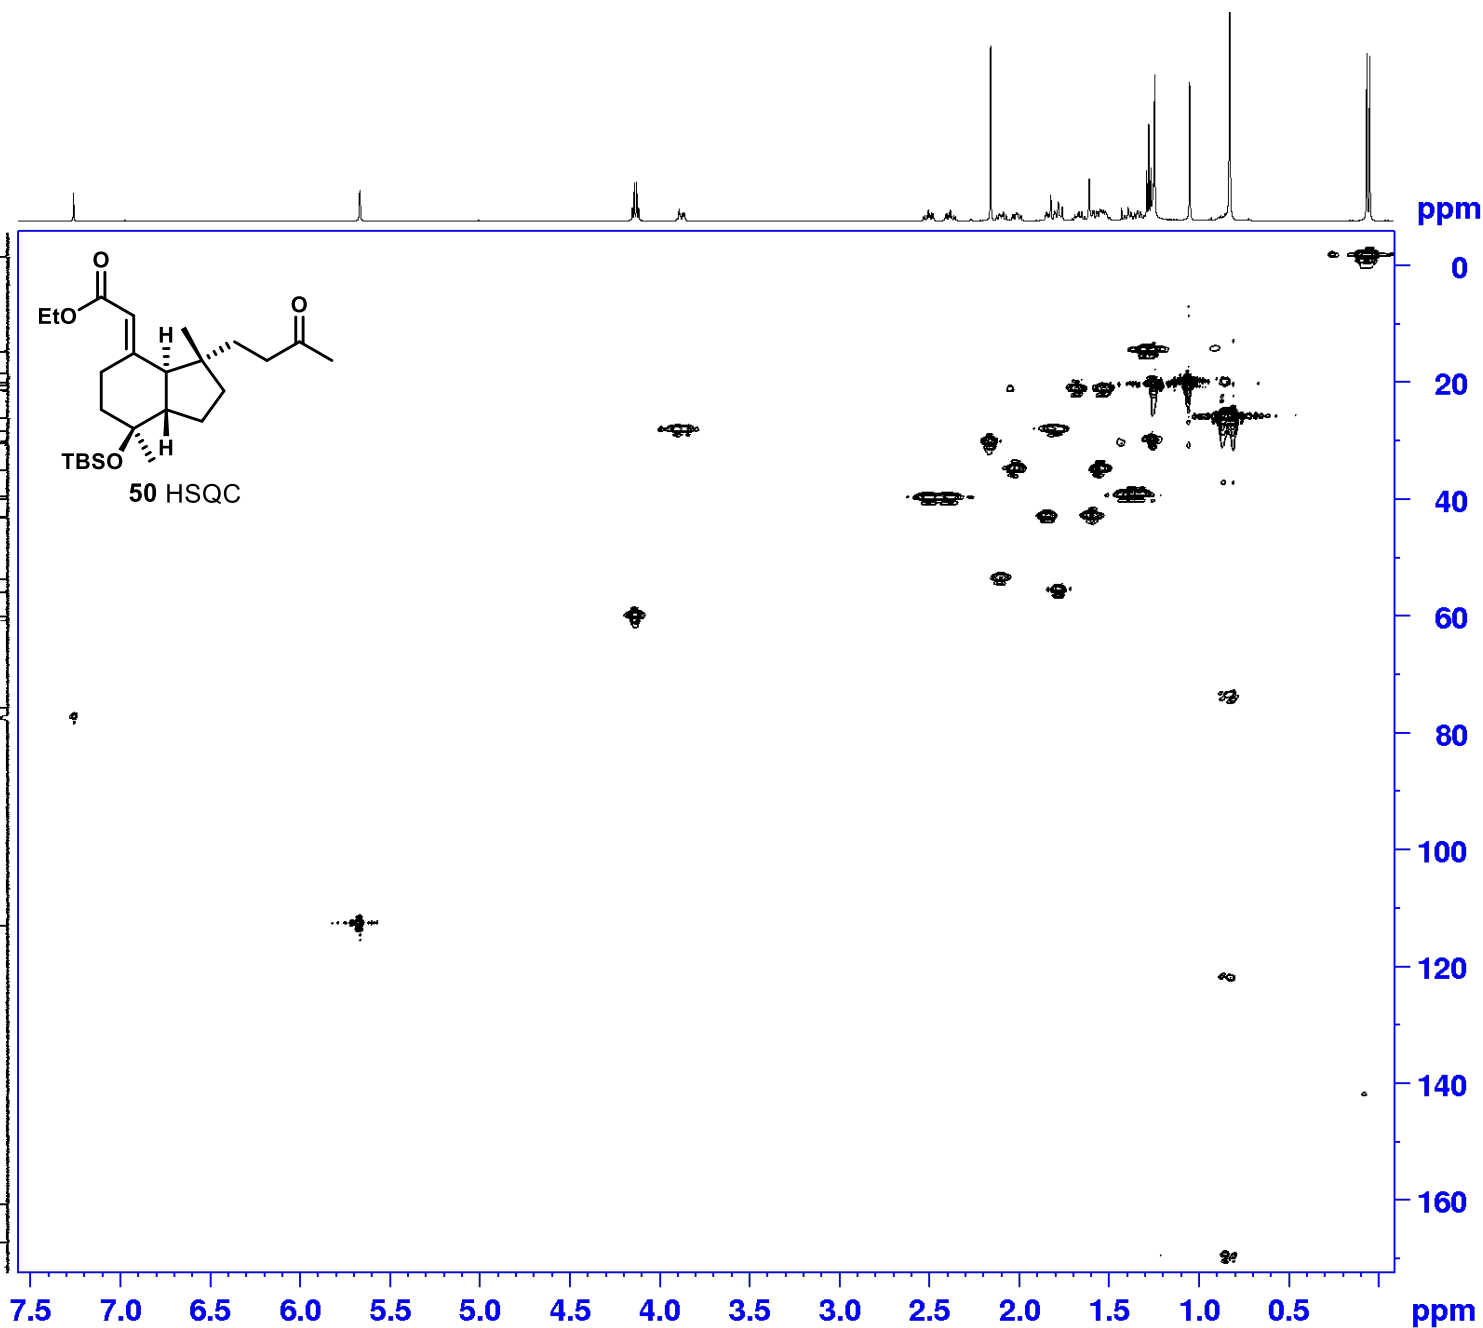

Current Data Parameters  
NAME J8CIV-142-f44-60-2  
EXPNO 6  
PROCNO 1

F2 - Acquisition Parameters  
Date\_ 20220613  
Time 16.57  
INSTRUM av600  
PROBHD 5 mm CPBBO BB-  
PULPROG hmbcgp1pdqf  
TD 4096  
SOLVENT CDCl3  
NS 2  
DS 16  
SWH 9615.385 Hz  
FIDRES 2.347506 Hz  
AQ 0.2129920 sec  
RG 2050  
DW 52.000 usec  
DE 10.00 usec  
TE 297.9 K  
CNST2 145.0000000  
CNST13 10.0000000  
D0 0.00000300 sec  
D1 1.10000002 sec  
D2 0.00344828 sec  
D6 0.05000000 sec  
D16 0.00020000 sec  
IN0 0.00001380 sec

----- CHANNEL f1 -----  
SFO1 600.1342009 MHz  
NUC1 1H  
P1 9.50 usec  
P2 19.00 usec  
PLW1 30.00000000 W

----- CHANNEL f2 -----  
SFO2 150.9194083 MHz  
NUC2 13C  
P3 10.10 usec  
PLW2 64.00000000 W

----- GRADIENT CHANNEL -----  
GPNAM[1] SMSQ10.100  
GPNAM[2] SMSQ10.100  
GPNAM[3] SMSQ10.100  
GPZ1 50.00 %  
GPZ2 30.00 %  
GPZ3 40.10 %  
P16 1000.00 usec

F1 - Acquisition parameters  
TD 256  
SFO1 150.9194 MHz  
FIDRES 283.061584 Hz  
SW 240.074 ppm  
FnMODE QF

F2 - Processing parameters  
SI 2048  
SF 600.1300327 MHz  
WDW SINE  
SSB 0  
LB 0 Hz  
GB 0  
PC 1.00

F1 - Processing parameters  
SI 1024  
MC2 QF  
SF 150.9028003 MHz  
WDW SINE  
SSB 0  
LB 0 Hz  
GB 0

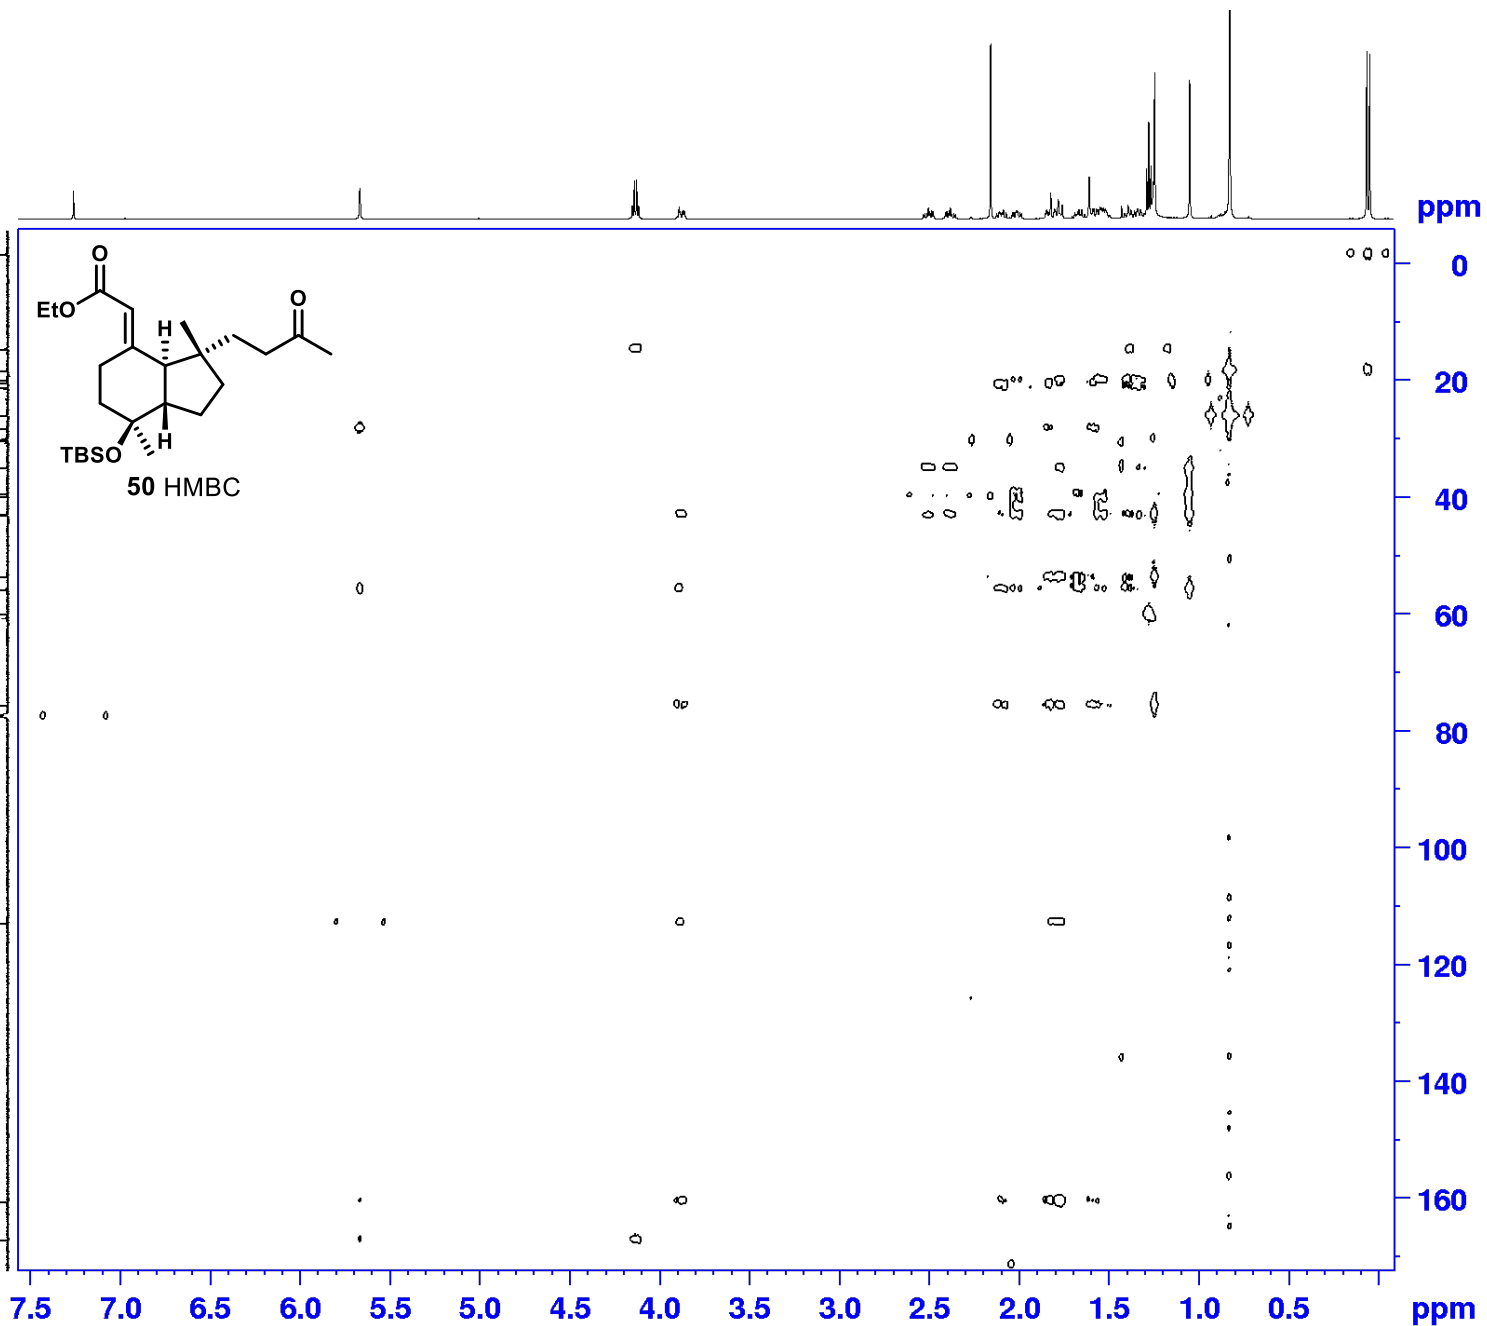

Current Data Parameters  
NAME JSCIV-142-f44-60-2  
EXPNO 7  
PROCNO 1

F2 - Acquisition Parameters  
Date\_ 20220613  
Time 17:10  
INSTRUM av600  
PROBHD 5 mm CPBBO BB-  
PULPROG noesypph  
TD 2048  
SOLVENT CDCl3  
NS 2  
DS 16  
SWH 9615.385 Hz  
FIDRES 4.695012 Hz  
AQ 0.1064960 sec  
RG 57  
DW 52.000 usec  
DE 16.68 usec  
TE 297.9 K  
D0 0.00003990 sec  
D1 2.00000000 sec  
D8 1.00000000 sec  
D16 0.00020000 sec  
IN0 0.00010400 sec

----- CHANNEL f1 -----  
SF01 600.1342009 MHz  
NUC1 1H  
P1 9.50 usec  
P2 19.00 usec  
PLW1 30.00000000 W

----- GRADIENT CHANNEL -----  
GPNAM[1] SMSQ10.100  
GPZ1 40.00 %  
P16 1000.00 usec

F1 - Acquisition parameters  
TD 256  
SF01 600.1342 MHz  
FIDRES 75.120193 Hz  
SW 16.022 ppm  
FnMODE States-TPPI

F2 - Processing parameters  
SI 1024  
SF 600.1300333 MHz  
WDW QSINE  
SSB 2  
LB 0 Hz  
GB 0  
PC 1.00

F1 - Processing parameters  
SI 1024  
MC2 States-TPPI  
SF 600.1300314 MHz  
WDW QSINE  
SSB 2  
LB 0 Hz  
GB 0

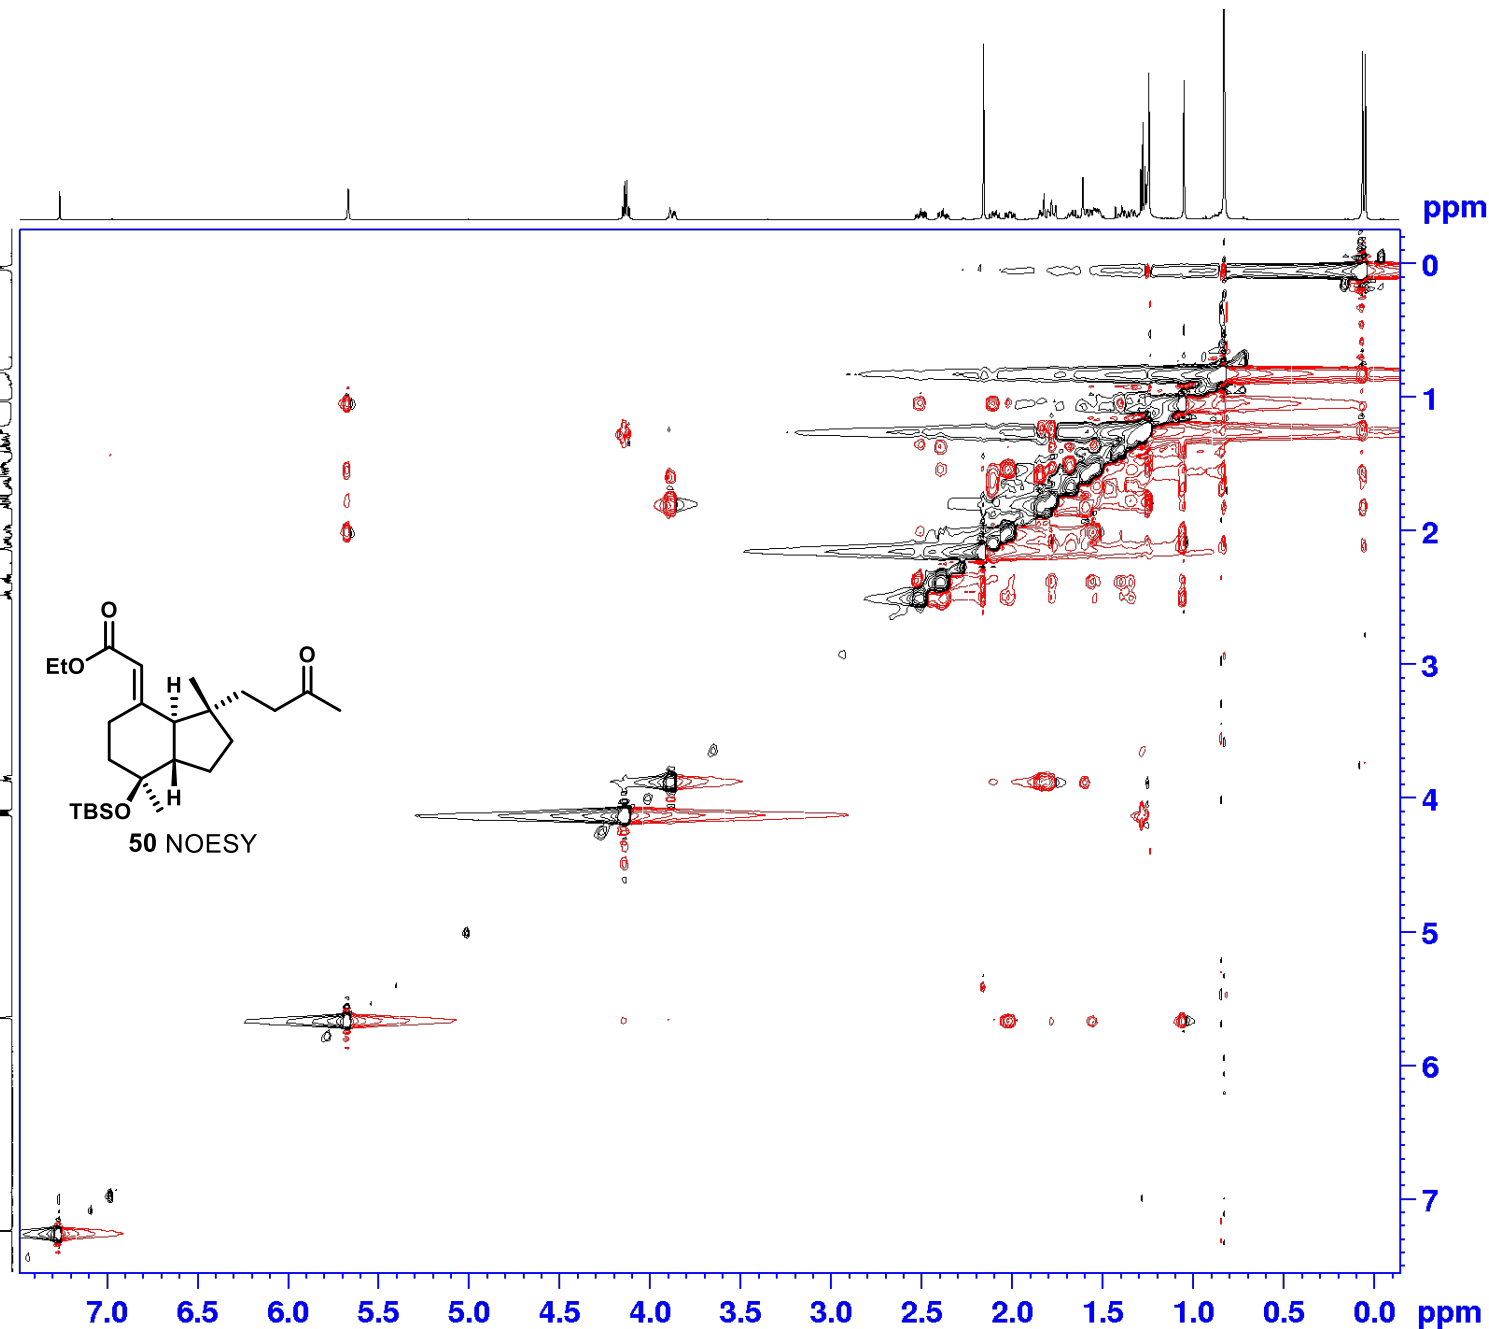

Current Data Parameters  
NAME JC 3-269 col  
EXPNO 1  
PROCNO 1

F2 - Acquisition Parameters  
Date\_ 20210228  
Time 19.35  
INSTRUM av600  
PROBHD 5 mm CPBBO BB-  
PULPROG zg30  
TD 98074  
SOLVENT CDC13  
NS 8  
DS 2  
SWH 9615.385 Hz  
FIDRES 0.098042 Hz  
AQ 5.0998478 sec  
RG 8  
DW 52.000 usec  
DE 13.70 usec  
TE 298.1 K  
D1 0.10000000 sec  
TD0 1

===== CHANNEL f1 =====  
SFO1 600.1342009 MHz  
NUC1 1H  
P1 12.00 usec  
PLW1 28.00000000 W

F2 - Processing parameters  
SI 65536  
SF 600.1300350 MHz  
WDW EM  
SSB 0  
LB 0.30 Hz  
GB 0  
PC 1.00

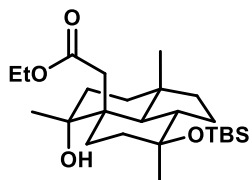

51

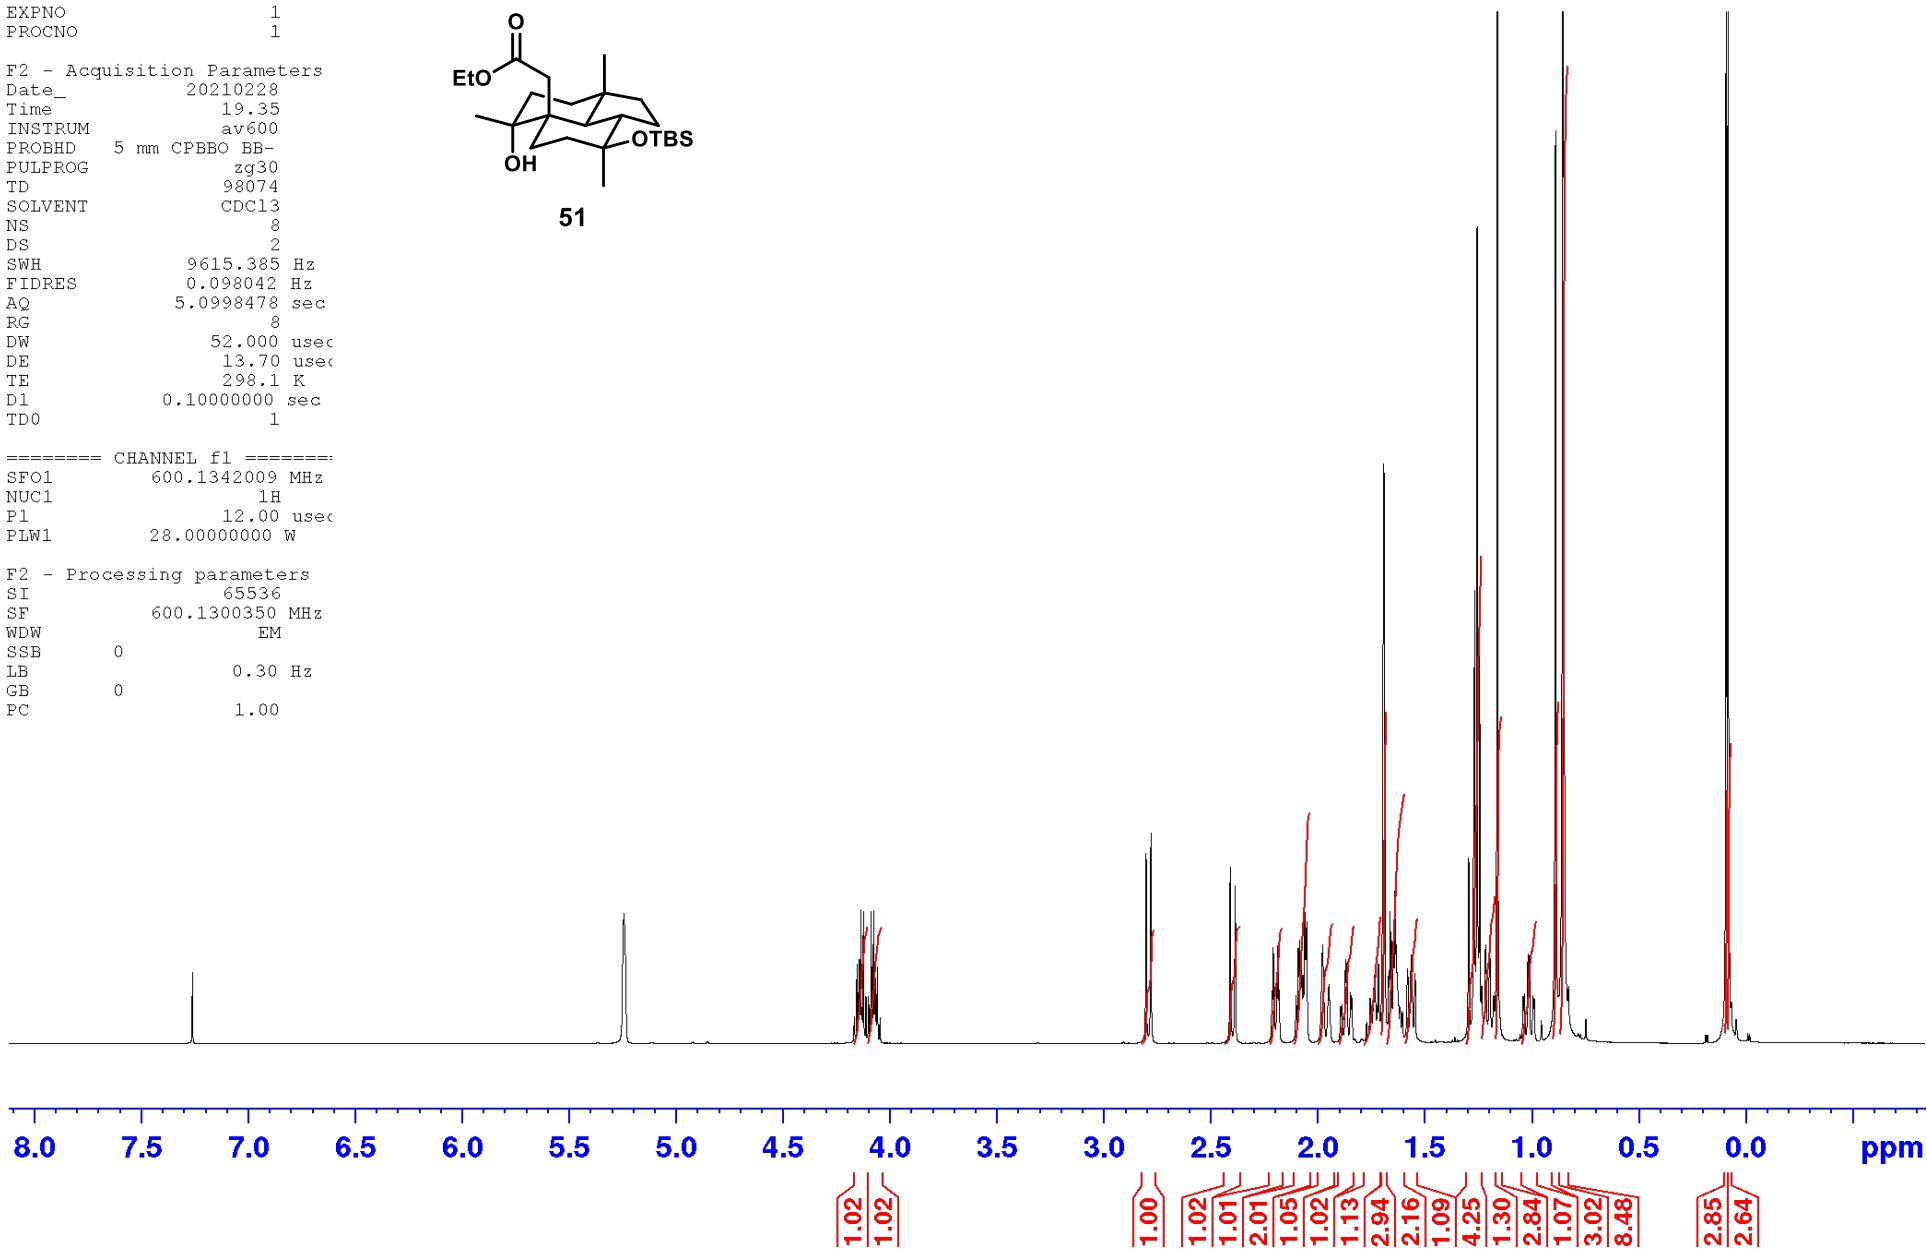

Current Data Parameters  
NAME JC 3-269 col  
EXPNO 2  
PROCNO 1

F2 - Acquisition Parameters

Date\_ 20210228  
Time 19.40  
INSTRUM av600  
PROBHD 5 mm CPBBO BB-  
PULPROG zgdc30  
TD 65536  
SOLVENT CDCl3  
NS 191  
DS 4  
SWH 36231.883 Hz  
FIDRES 0.552855 Hz  
AQ 0.9043968 sec  
RG 2050  
DW 13.800 usec  
DE 19.65 usec  
TE 298.1 K  
D1 0.40000001 sec  
D11 0.03000000 sec  
TD0 1

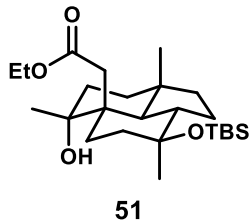

=====  
CHANNEL f1  
SFO1 150.9194075 MHz  
NUC1 13C  
P1 10.00 usec  
PLW1 65.00000000 W

=====  
CHANNEL f2  
SFO2 600.1330010 MHz  
NUC2 1H  
CPDPRG[2] waltz16  
PCPD2 80.00 usec  
PLW2 28.00000000 W  
PLW12 0.63000000 W

F2 - Processing parameters  
SI 65536  
SF 150.9027940 MHz  
WDW EM  
SSB 0  
LB 1.00 Hz  
GB 0  
PC 1.00

173.47  
141.08  
122.74  
77.09  
60.25  
56.57  
44.93  
42.99  
42.27  
40.65  
39.83  
38.43  
37.21  
33.26  
25.95  
22.32  
22.22  
21.28  
18.97  
18.21  
14.29  
-1.72  
-1.78

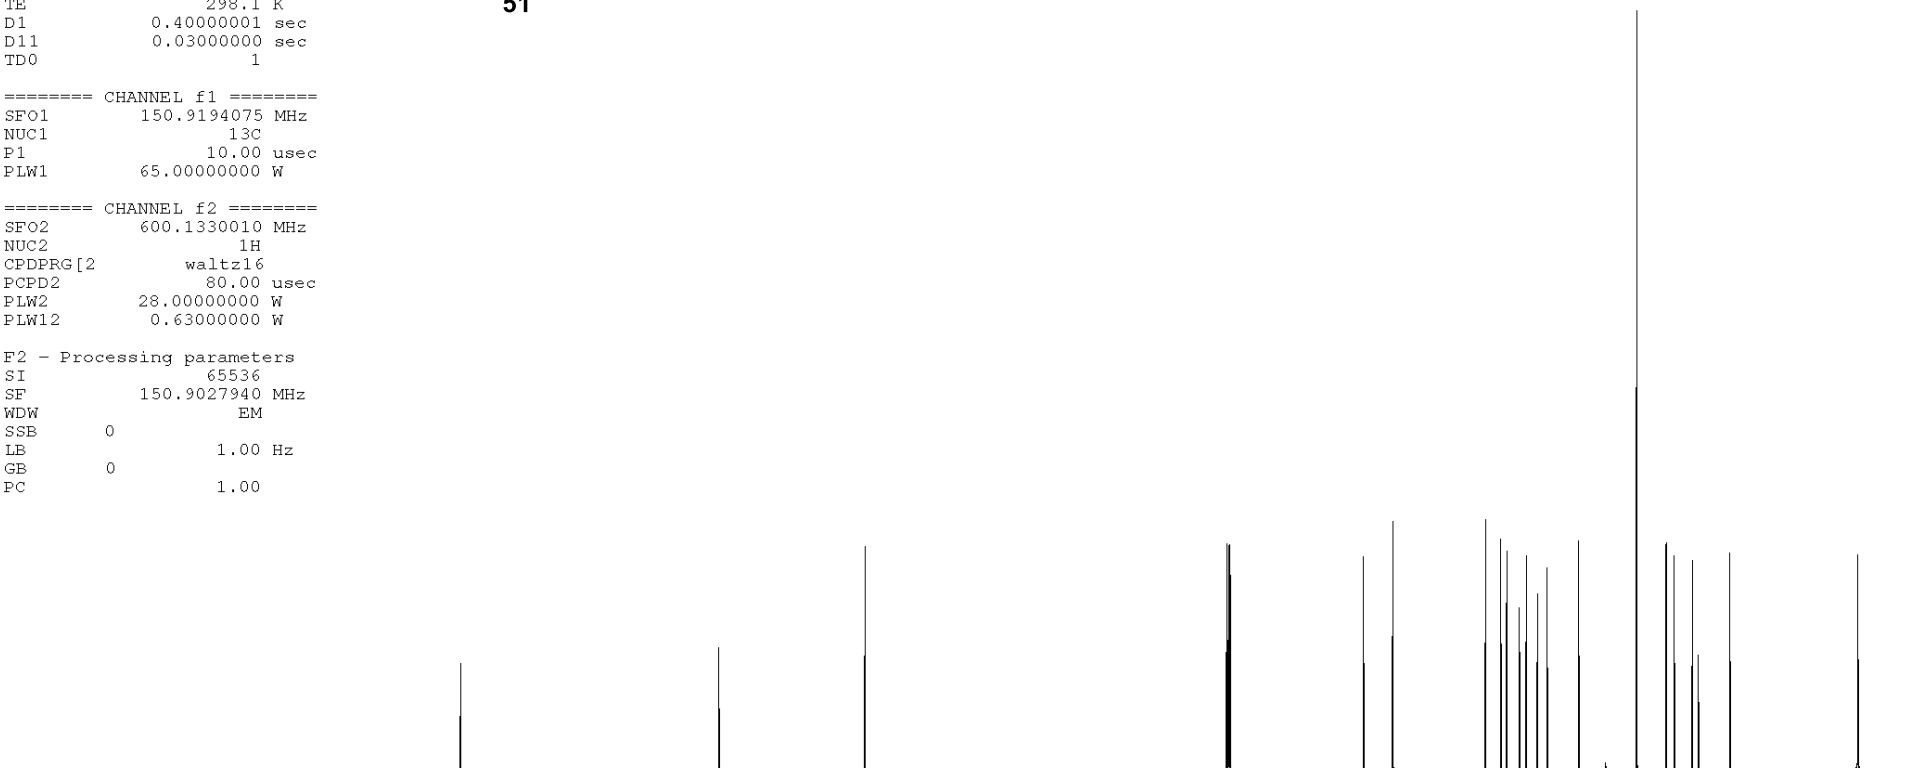

220 210 200 190 180 170 160 150 140 130 120 110 100 90 80 70 60 50 40 30 20 10 ppm

Current Data Parameters

NAME JC 3-269 col  
EXPNO 1  
PROCNO 1

F2 - Acquisition Parameters

Date\_ 20210228  
Time 19.35  
INSTRUM av600  
PROBHD 5 mm CPBBO BB-  
PULPROG zg30  
TD 98074  
SOLVENT CDCl3  
NS 8  
DS 2  
SWH 9615.385 Hz  
FIDRES 0.098042 Hz  
AQ 5.0998478 sec  
RG 8  
DW 52.000 usec  
DE 13.70 usec  
TE 298.1 K  
D1 0.10000000 sec  
TDO 1

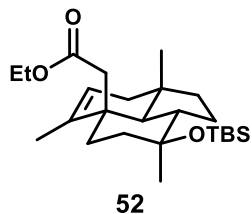

==== CHANNEL f1 =====

SFO1 600.1342009 MHz  
NUC1 1H  
P1 12.00 usec  
PLW1 28.00000000 W

F2 - Processing parameters

SI 65536  
SF 600.1300350 MHz  
WDW EM  
SSB 0  
LB 0.30 Hz  
GB 0  
PC 1.00

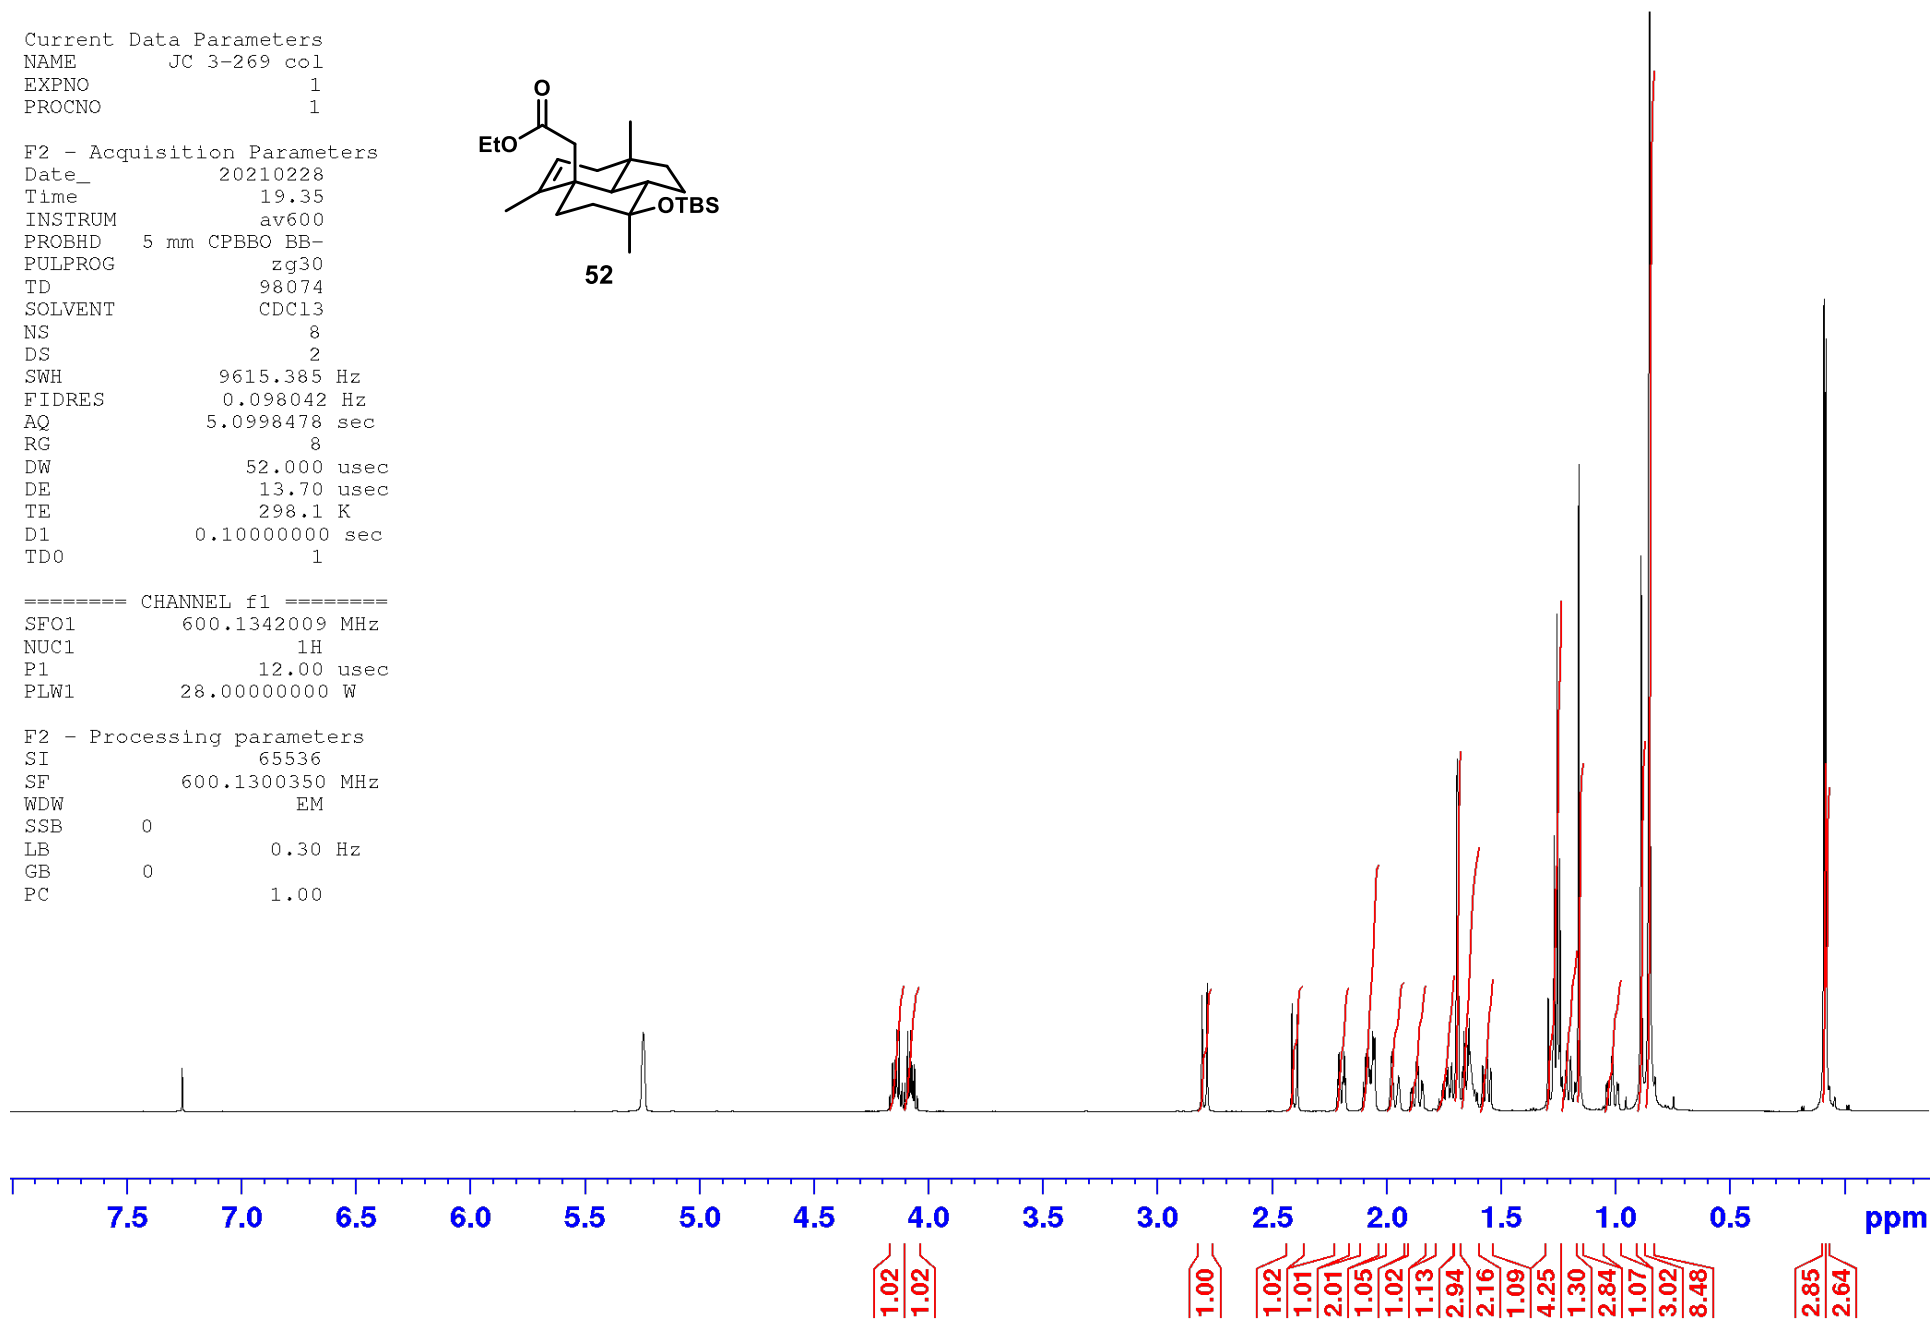



Current Data Parameters  
NAME JC 5-001 col  
EXPNO 2  
PROCNO 1

F2 - Acquisition Parameters  
Date\_ 20210424  
Time 19.43  
INSTRUM av600  
PROBHD 5 mm CPBBO BB-  
PULPROG zgdc30  
TD 65536  
SOLVENT CDCl3  
NS 164  
DS 4  
SWH 36231.883 Hz  
FIDRES 0.552855 Hz  
AQ 0.9043968 sec  
RG 2050  
DW 13.800 usec  
DE 19.65 usec  
TE 298.1 K  
D1 0.40000001 sec  
D11 0.03000000 sec  
TD0 1

----- CHANNEL f1 -----  
SFO1 150.9194075 MHz  
NUC1 13C  
P1 10.00 usec  
PLW1 65.00000000 W

----- CHANNEL f2 -----  
SFO2 600.1330010 MHz  
NUC2 1H  
CPDPRG[2] waltz16  
PCPD2 80.00 usec  
PLW2 28.00000000 W  
PLW12 0.63000000 W

F2 - Processing parameters  
SI 65536  
SF 150.9027928 MHz  
WDW EM  
SSB 0  
LB 1.00 Hz  
GB 0  
PC 1.00

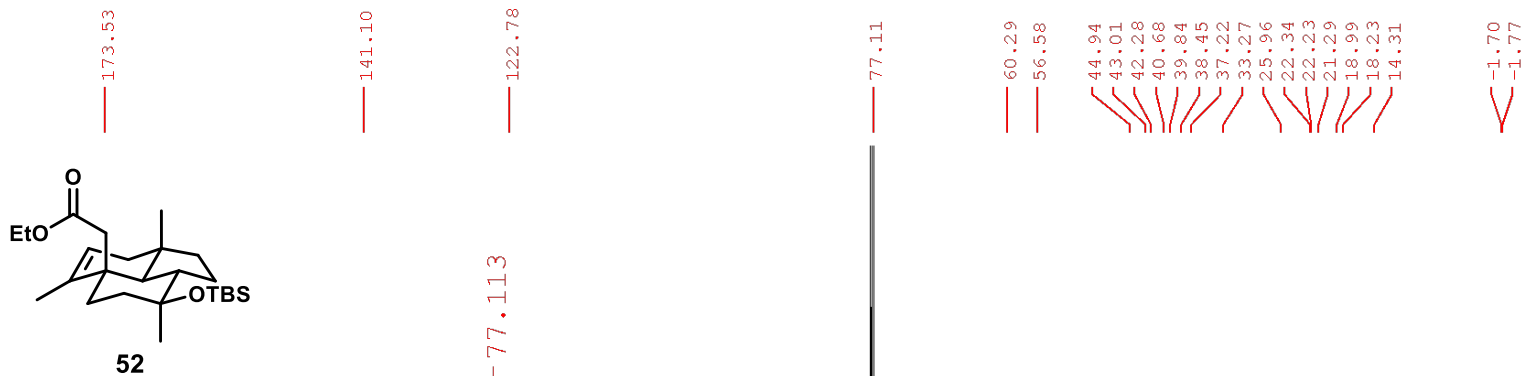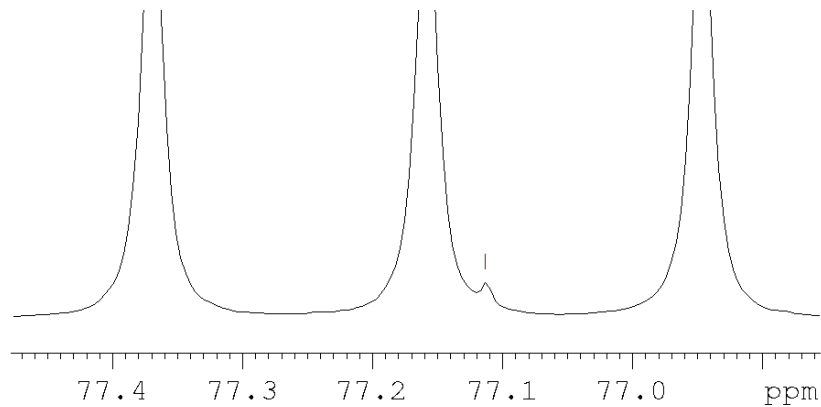

220 210 200 190 180 170 160 150 140 130 120 110 100 90 80 70 60 50 40 30 20 10 ppm

Current Data Parameters  
NAME JC 3-185 bot socl2  
EXPNO 1  
PROCNO 1

F2 - Acquisition Parameters  
Date\_ 20200824  
Time 23.44  
INSTRUM av600  
PROBHD 5 mm CPBBO BB-  
PULPROG zg30  
TD 98074  
SOLVENT CDC13  
NS 8  
DS 2  
SWH 9615.385 Hz  
FIDRES 0.098042 Hz  
AQ 5.0998478 sec  
RG 10  
DW 52.000 usec  
DE 13.70 usec  
TE 298.0 K  
D1 0.10000000 sec  
TDO 1

==== CHANNEL f1 =====  
SFO1 600.1342009 MHz  
NUC1 1H  
P1 12.00 usec  
PLW1 28.00000000 W

F2 - Processing parameters  
SI 65536  
SF 600.1300341 MHz  
WDW EM  
SSB 0  
LB 0.30 Hz  
GB 0  
PC 1.00

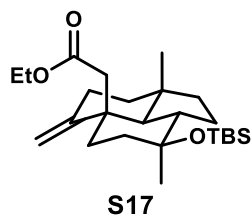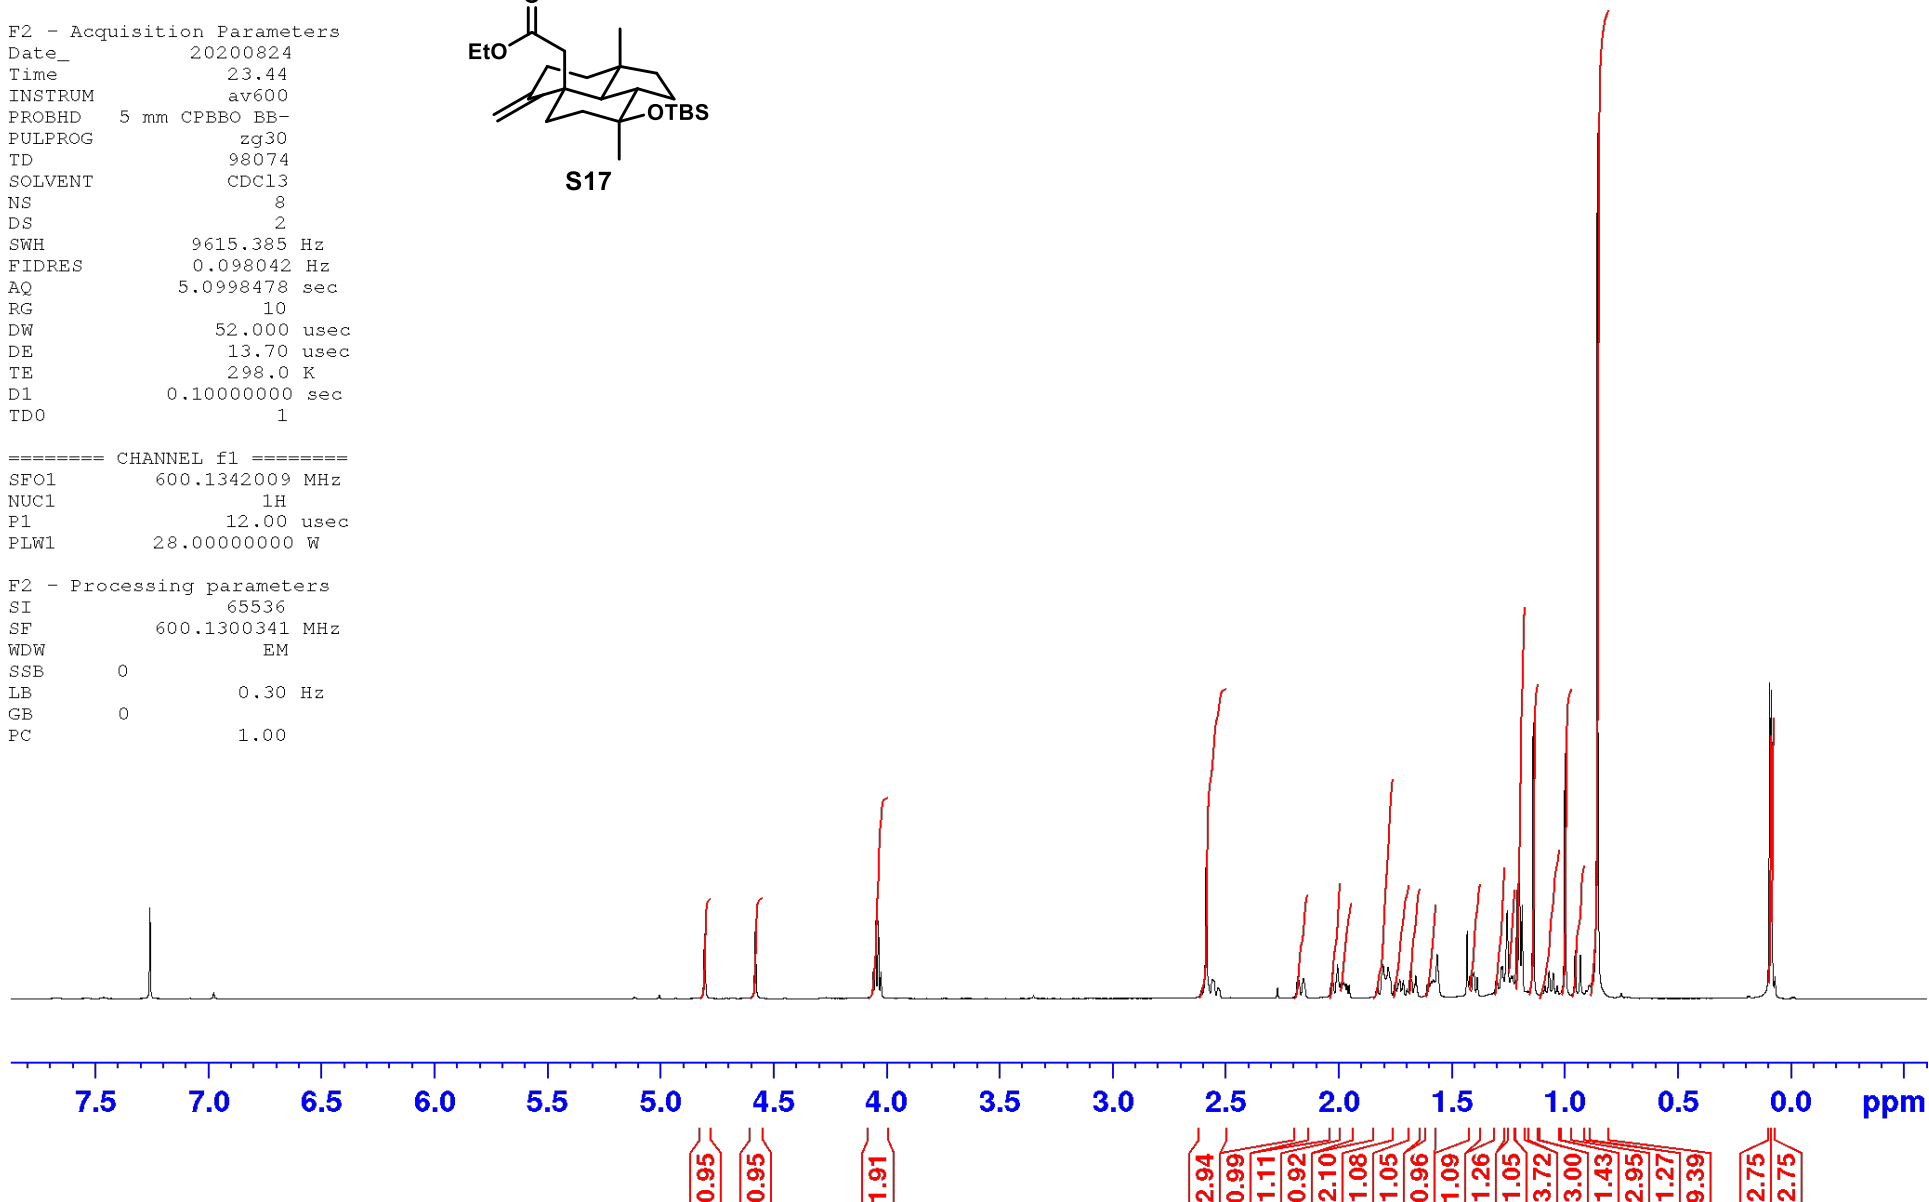

Current Data Parameters  
 NAME JSCIV-164-E87-103  
 EXFNO 2  
 PROCNO 1

F2 - Acquisition Parameters  
 Date\_ 20210818  
 Time 18.21  
 INSTRUM cryo500  
 PROBHD 5 mm CPYCI 1H-  
 PULPROG SpinEchopg30gp2.prd  
 TD 65536  
 SOLVENT cdcl3  
 NS 109  
 DS 16  
 SWH 30303.031 Hz  
 FIDRES 0.462388 Hz  
 AQ 1.0813440 sec  
 RG 3251  
 DW 16.500 usec  
 DE 6.00 usec  
 TE 298.1 K  
 D1 0.25000000 sec  
 d11 0.03000000 sec  
 D16 0.00020000 sec  
 d17 0.00019600 sec  
 MCREST 0 sec  
 MCWPK 0.01500000 sec  
 F2 37.70 usec

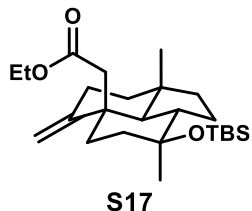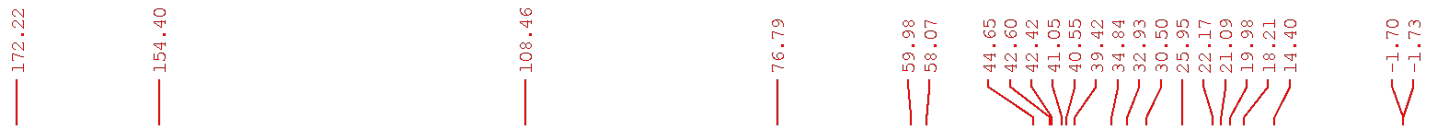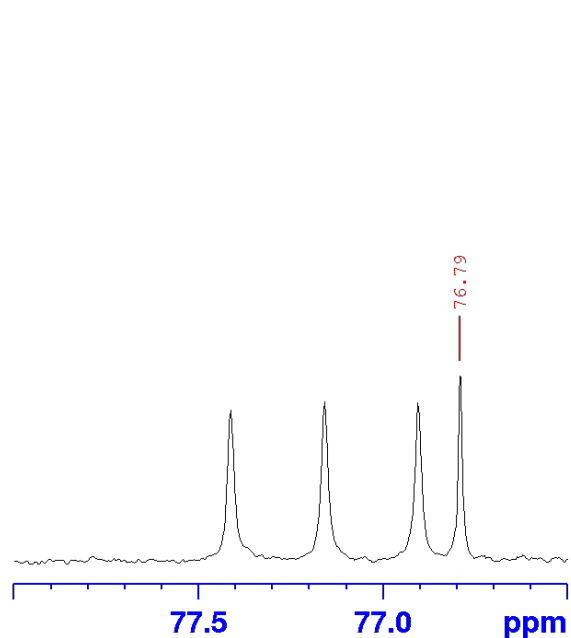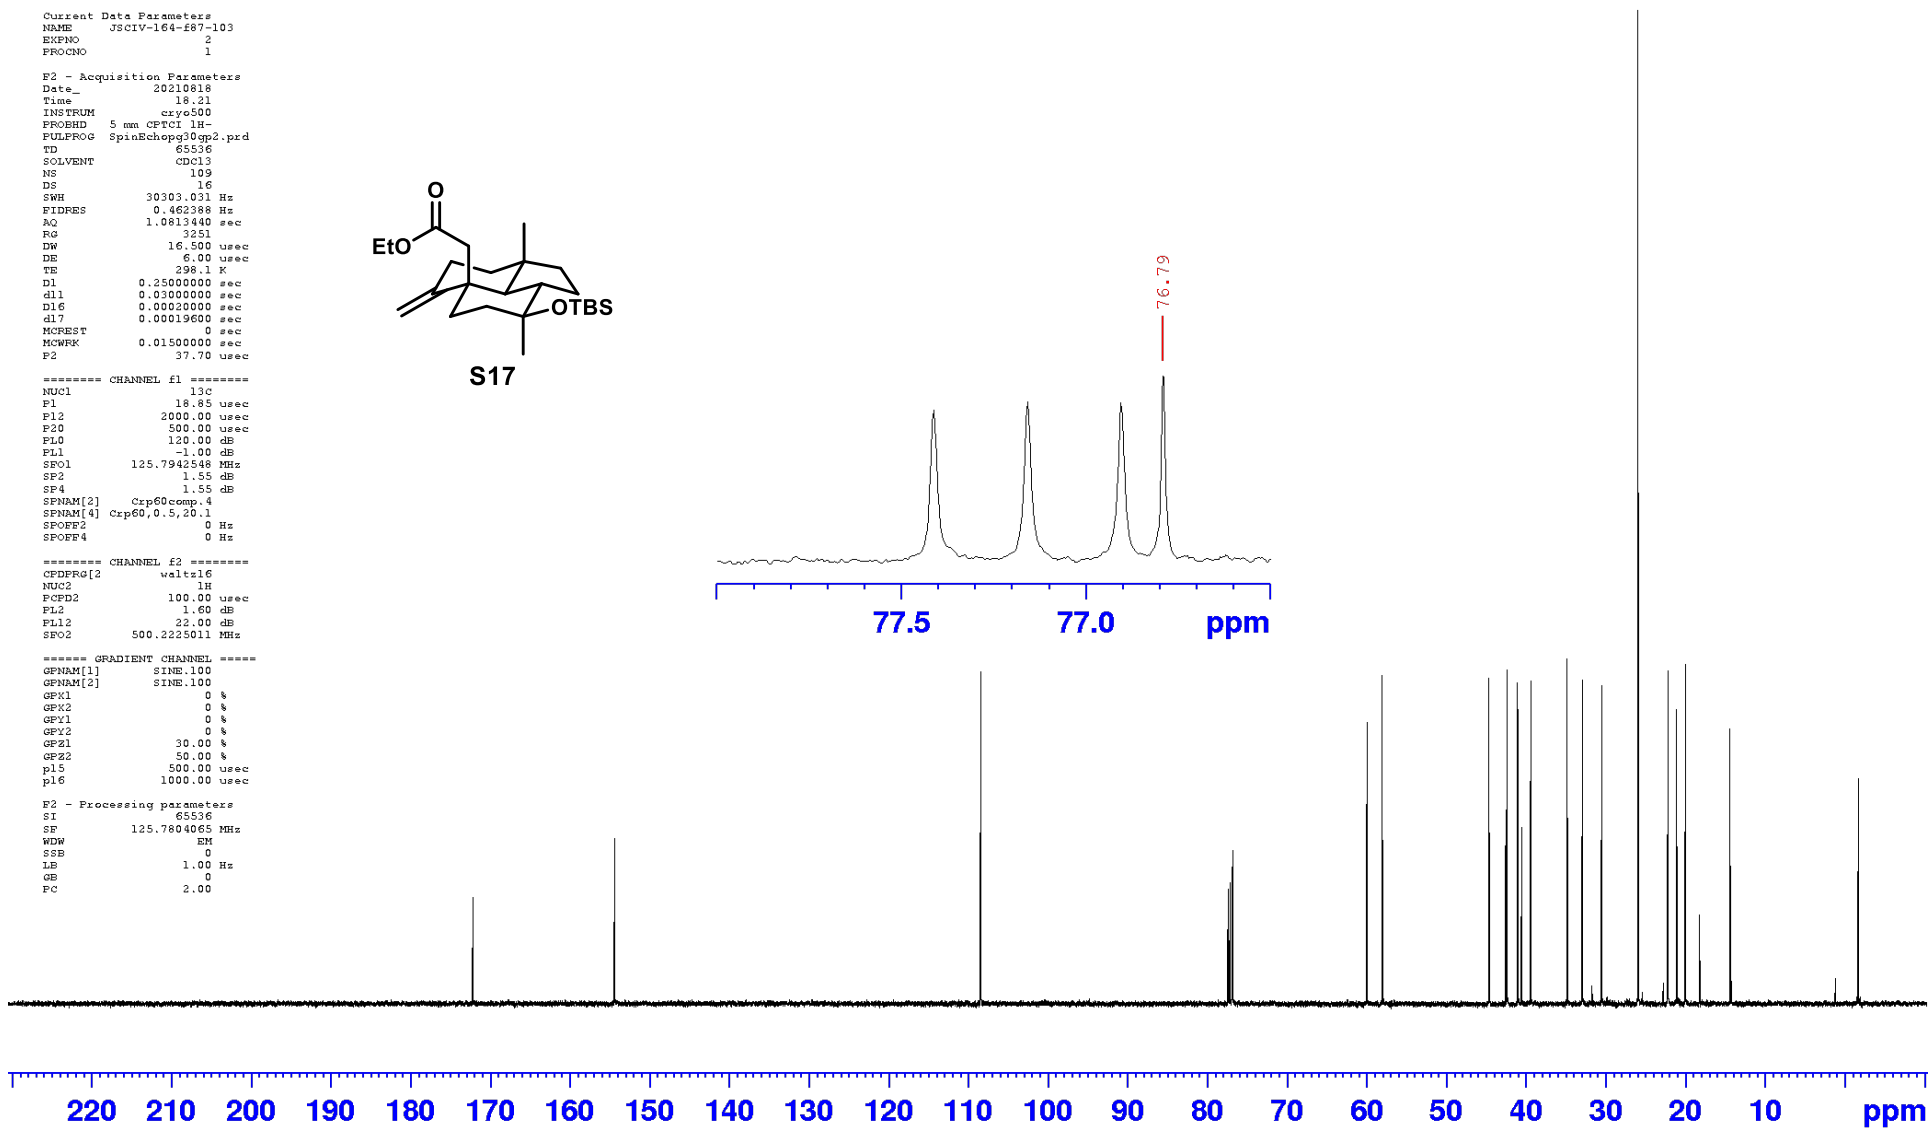

Current Data Parameters  
NAME JC 3-270 top dibal COL  
EXPNO 1  
PROCNO 1

F2 - Acquisition Parameters  
Date\_ 20210301  
Time 3.38  
INSTRUM av600  
PROBHD 5 mm CPBBO BB-  
PULPROG zg30  
TD 98074  
SOLVENT CDCl3  
NS 8  
DS 2  
SWH 9615.385 Hz  
FIDRES 0.098042 Hz  
AQ 5.0998478 sec  
RG 8  
DW 52.000 usec  
DE 13.70 usec  
TE 298.1 K  
D1 0.10000000 sec  
TD0 1

==== CHANNEL f1 =====  
SFO1 600.1342009 MHz  
NUC1 1H  
P1 12.00 usec  
PLW1 28.00000000 W

F2 - Processing parameters  
SI 65536  
SF 600.1300353 MHz  
WDW EM  
SSB 0  
LB 0.30 Hz  
GB 0  
PC 1.00

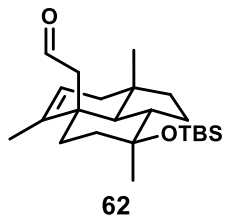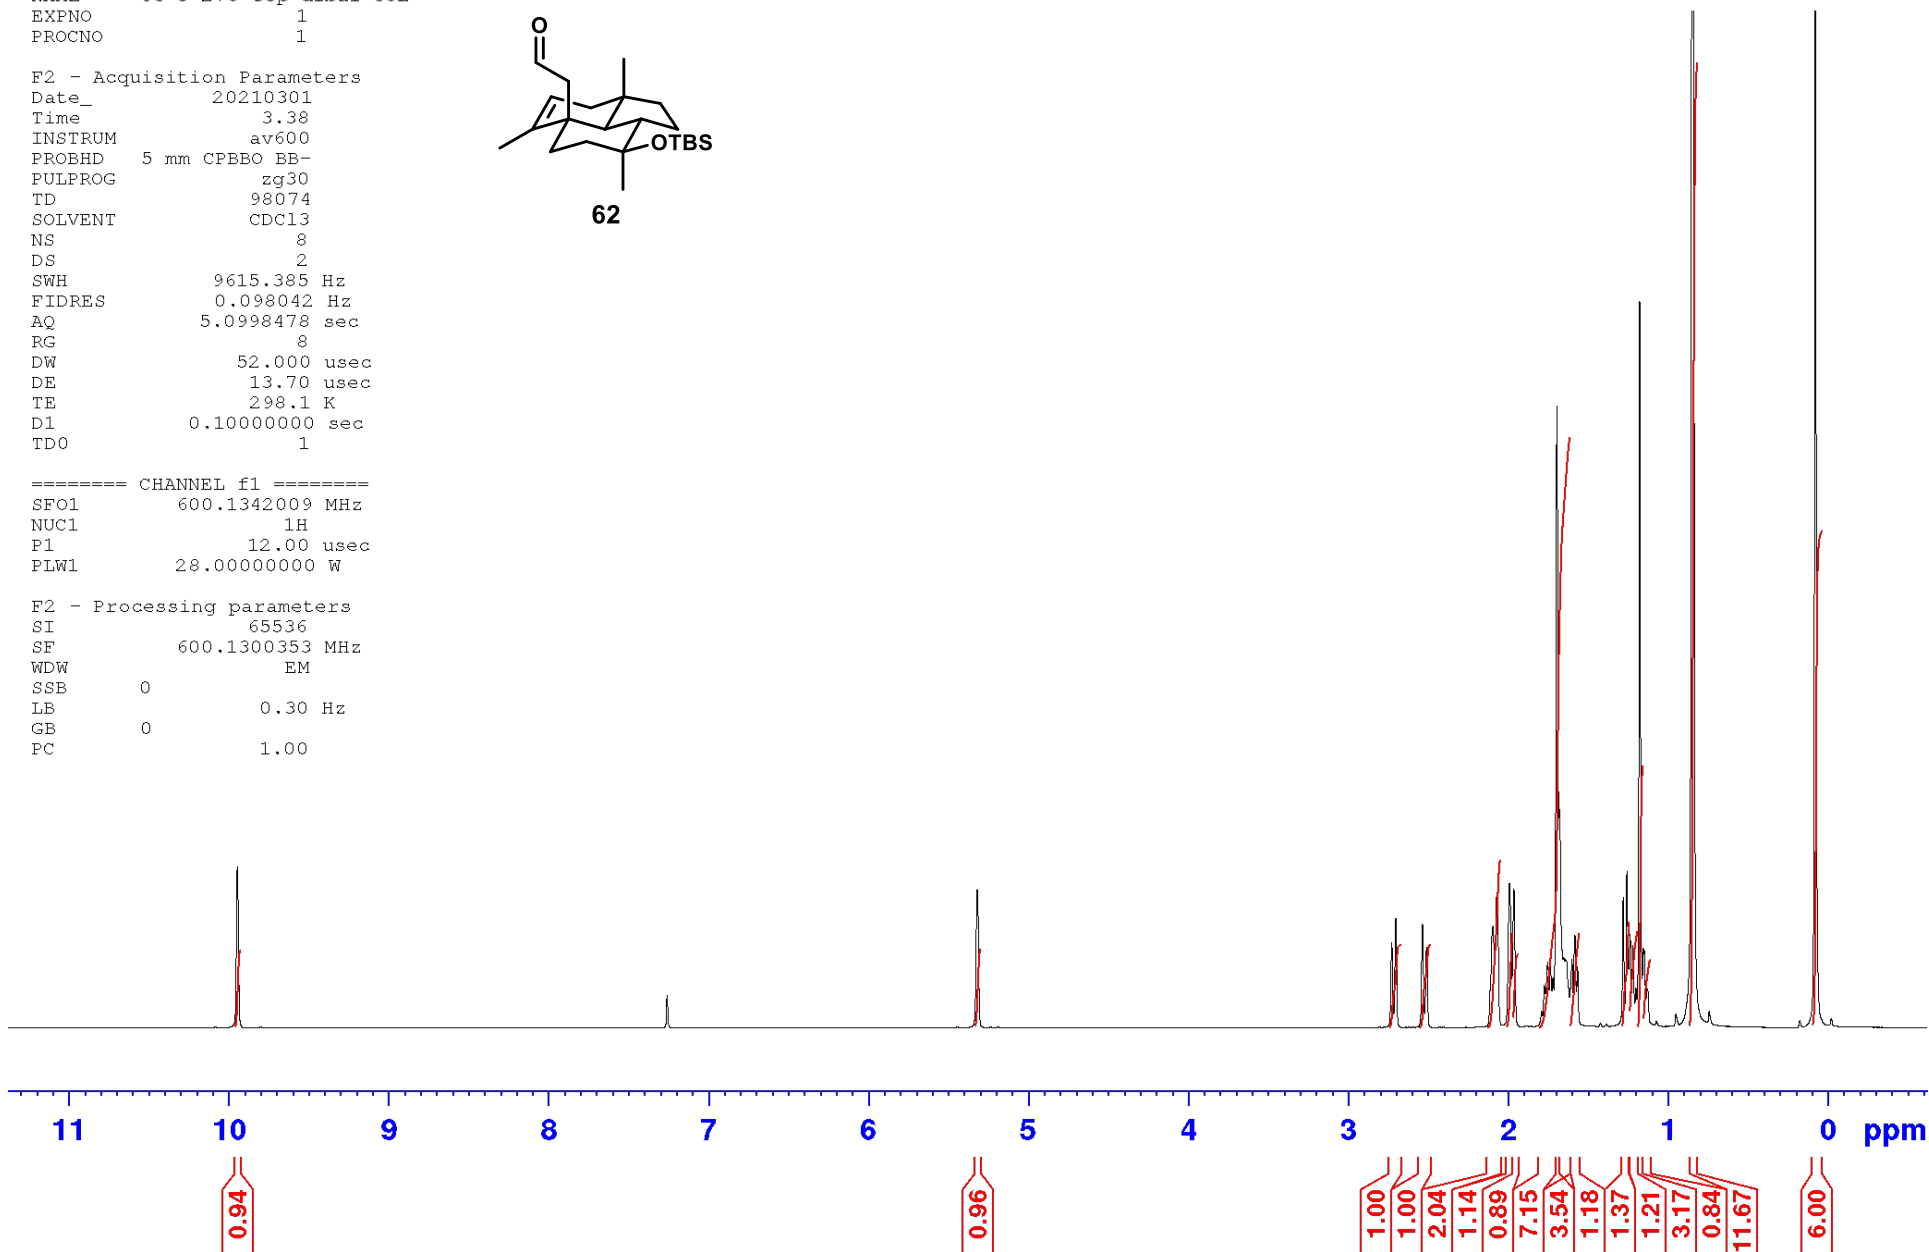

Current Data Parameters  
NAME JSCIV-162-f2-7  
EXPNO 2  
PROCNO 1

F2 - Acquisition Parameters  
Date\_ 20210816  
Time 15.42  
INSTRUM av600  
PROBHD 5 mm CPBBO BB-  
PULPROG zgdc30  
TD 65536  
SOLVENT CDCl3  
NS 143  
DS 4  
SWH 36231.883 Hz  
FIDRES 0.552855 Hz  
AQ 0.9043968 sec  
RG 2050  
DW 13.800 usec  
DE 19.63 usec  
TE 298.0 K  
D1 0.40000001 sec  
D11 0.030000000 sec  
TD0 1

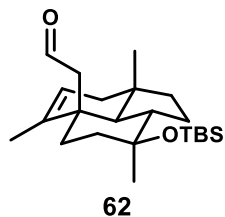

----- CHANNEL f1 -----  
SFO1 150.9194080 MHz  
NUC1 13C  
P1 10.10 usec  
PLW1 64.00000000 W

----- CHANNEL f2 -----  
SFO2 600.1330010 MHz  
NUC2 1H  
CPDPRG[2] waltz16  
PCPD2 80.00 usec  
PLW2 30.00000000 W  
PLW12 0.37154001 W

F2 - Processing parameters  
SI 65536  
SF 150.9027937 MHz  
WDW EM  
SSB 0  
LB 1.00 Hz  
GB 0  
PC 1.00

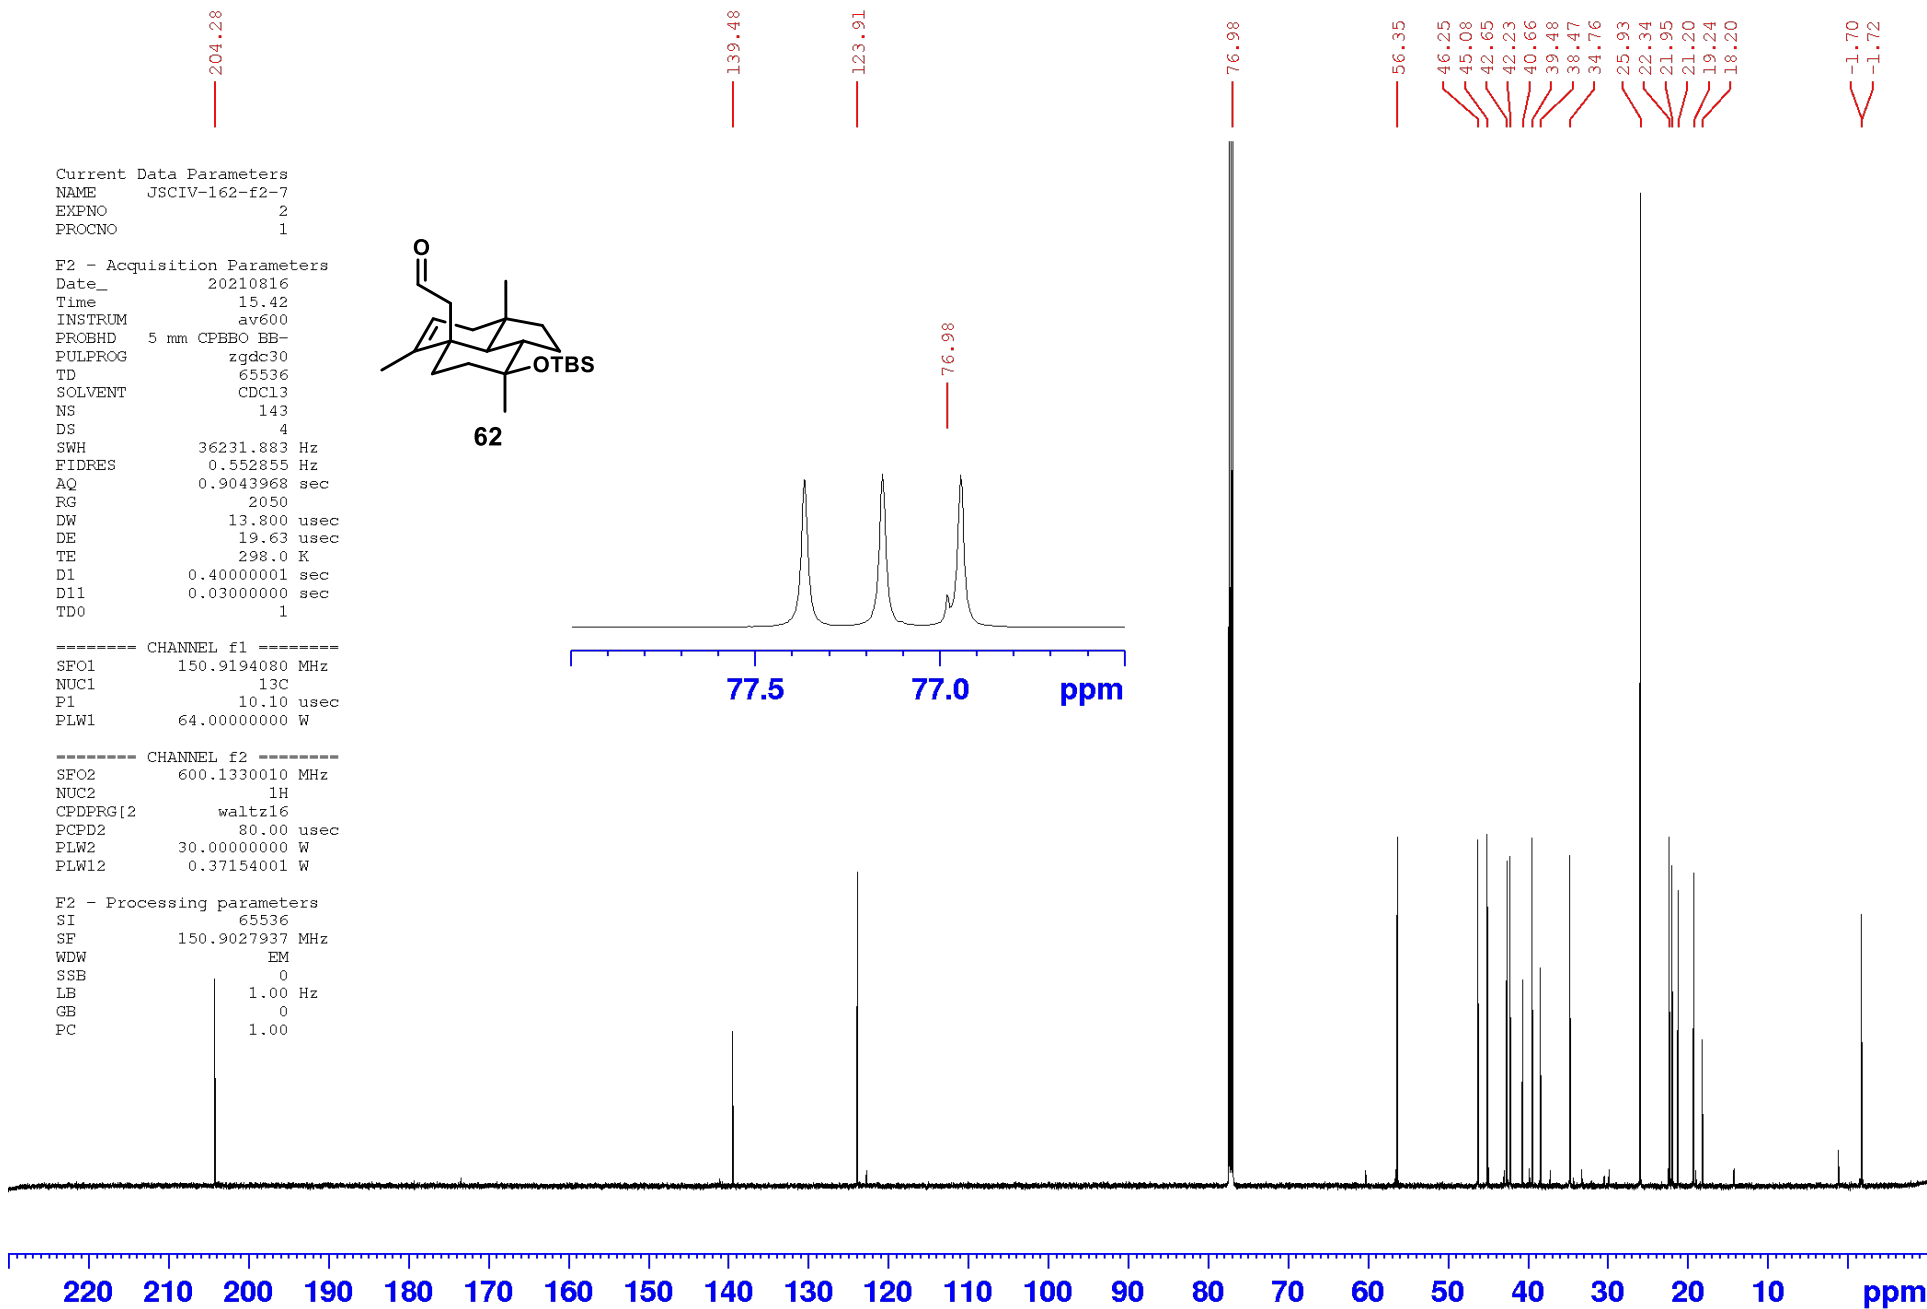

Current Data Parameters  
NAME JC 5-003 dibal bot col  
EXPNO 1  
PROCNO 1

F2 - Acquisition Parameters  
Date\_ 20210423  
Time\_ 18.43  
INSTRUM cryo500  
PROBHD 5 mm CPTCI 1H-  
PULPROG zg30  
TD 81728  
SOLVENT CDC13  
NS 8  
DS 2  
SWH 8012.820 Hz  
FIDRES 0.098043 Hz  
AQ 5.0998273 sec  
RG 4  
DW 62.400 usec  
DE 6.00 usec  
TE 298.0 K  
D1 0.10000000 sec  
MCREST 0 sec  
MCWRK 0.01500000 sec

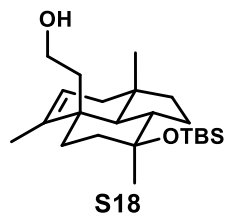

==== CHANNEL f1 =====  
NUC1 1H  
P1 9.75 usec  
PL1 1.60 dB  
SFO1 500.2235015 MHz

F2 - Processing parameters  
SI 65536  
SF 500.2200312 MHz  
WDW EM  
SSB 0  
LB 0.30 Hz  
GB 0  
PC 2.00

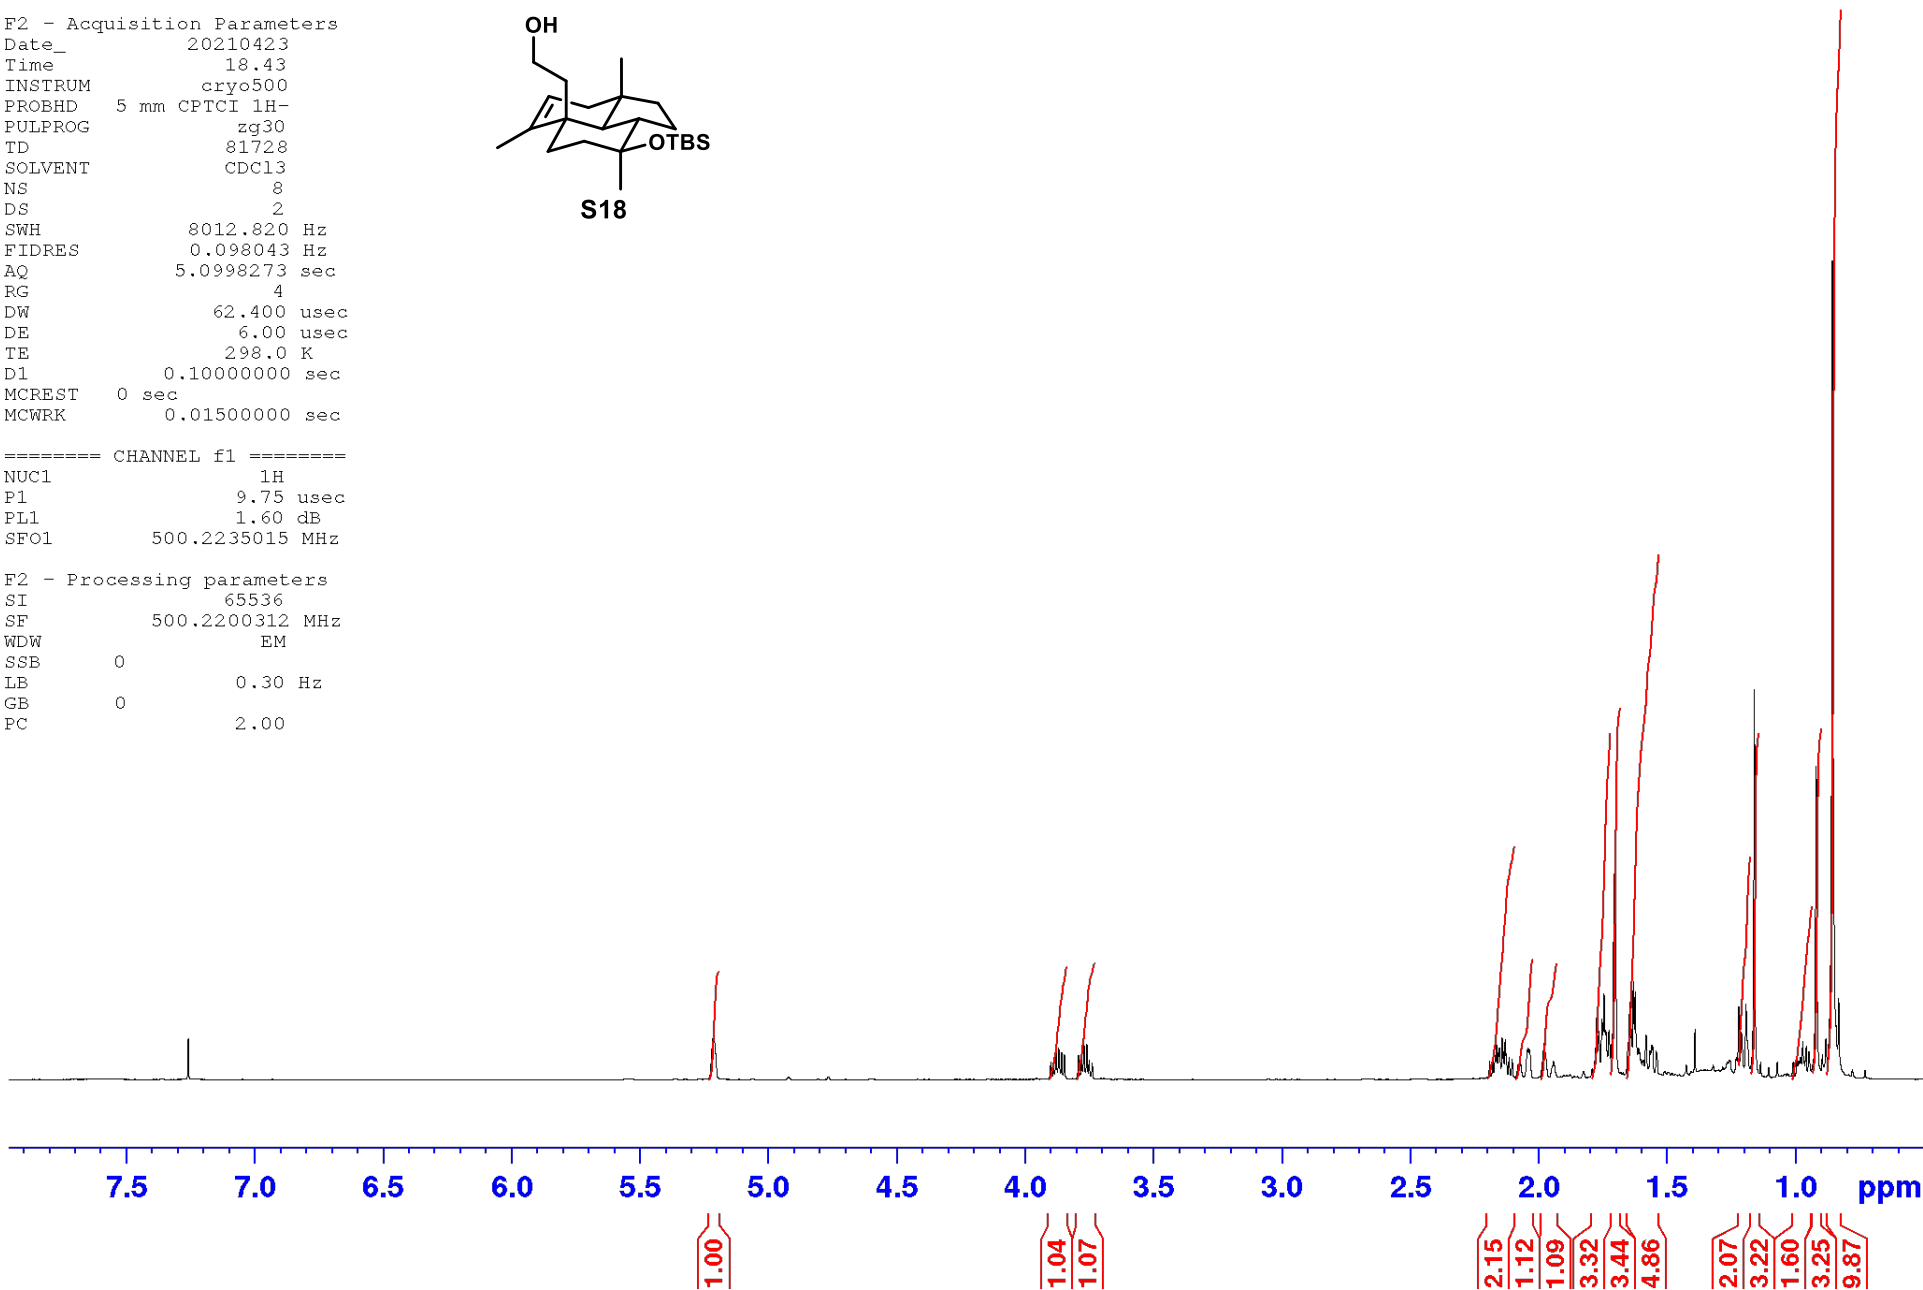

Current Data Parameters  
NAME JC 5-003 dibal bot col  
EXPNO 2  
PROCNO 1

F2 - Acquisition Parameters  
Date\_ 20210423  
Time 18.45  
INSTRUM cryo500  
PROBHD 5 mm CPTCI 1H-  
PULPROG SpinEchopg30gp2.prd  
TD 65536  
SOLVENT CDCl3  
NS 32  
DS 16  
SWH 30303.031 Hz  
FIDRES 0.462388 Hz  
AQ 1.0813440 sec  
RG 7298.2  
DW 16.500 usec  
DE 6.00 usec  
TE 298.0 K  
D1 0.25000000 sec  
d11 0.03000000 sec  
D16 0.00020000 sec  
d17 0.00019600 sec  
MCREST 0 sec  
MCWRK 0.01500000 sec  
P2 37.70 usec

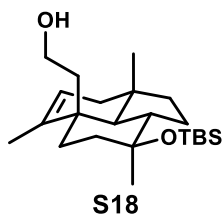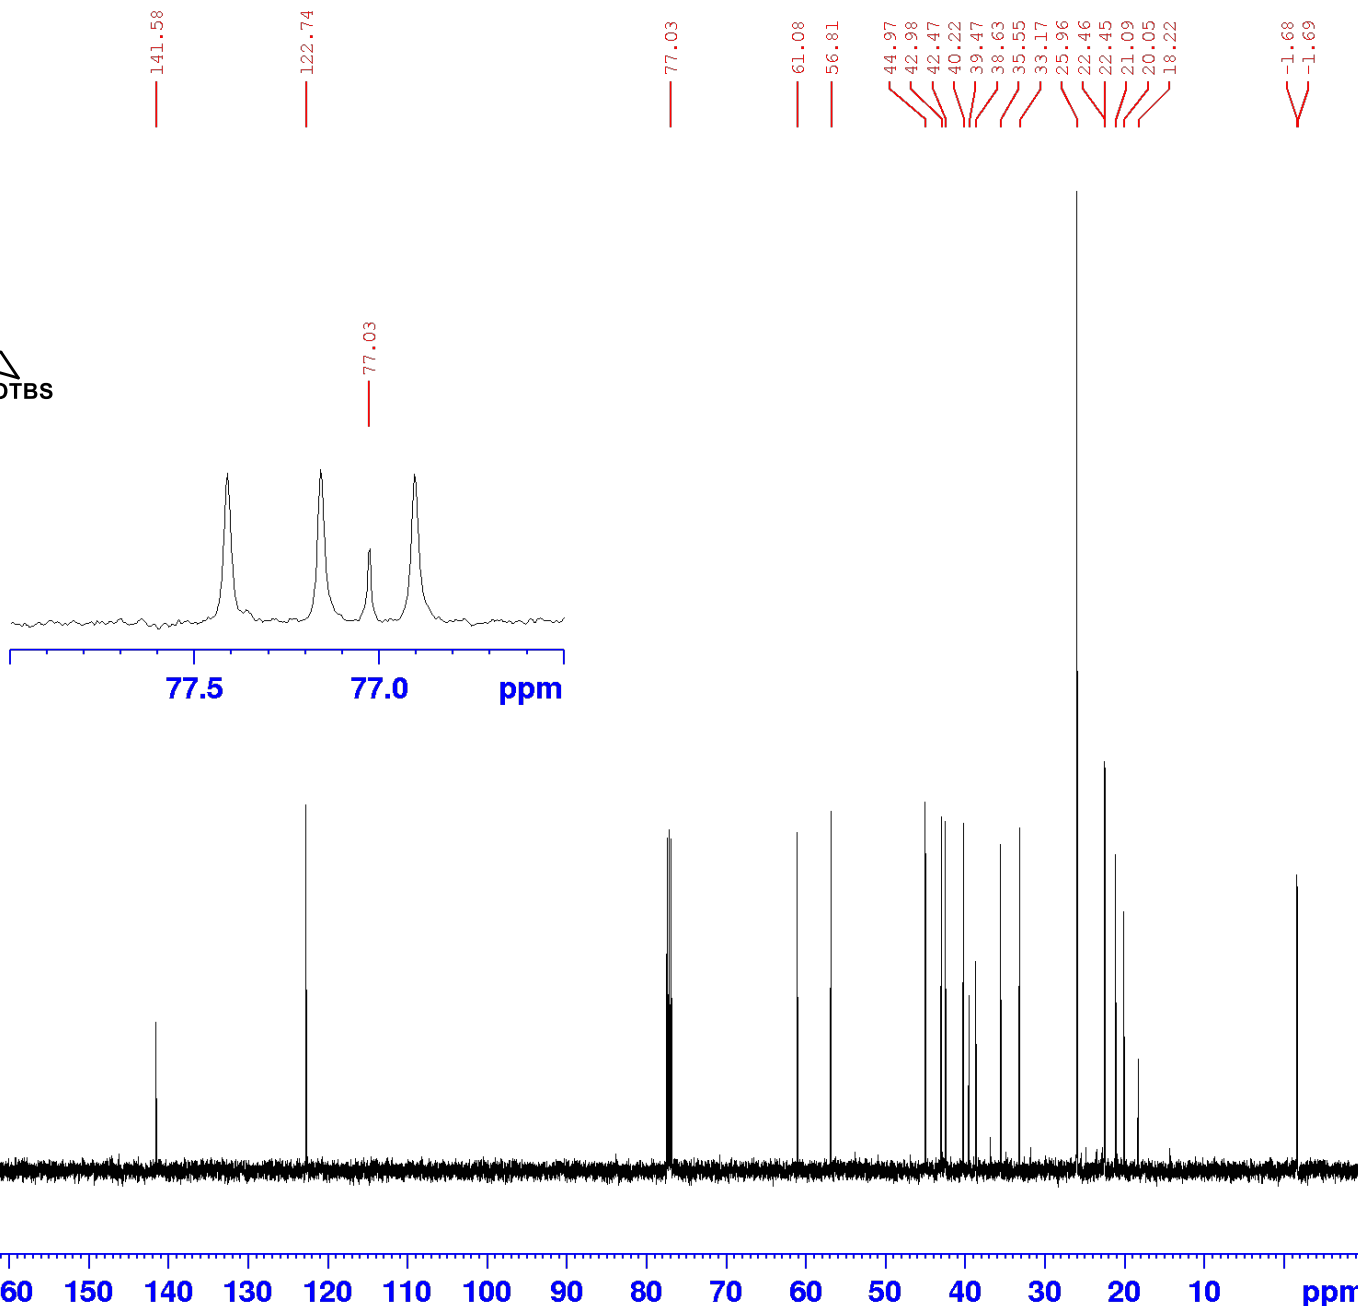

F2 - Processing parameters  
SI 65536  
SF 125.7804066 MHz  
WDW EM  
SSB 0  
LB 1.00 Hz  
GB 0  
PC 2.00

Current Data Parameters  
NAME JSCIV-242-f24-80  
EXPNO 1  
PROCNO 1

F2 - Acquisition Parameters  
Date\_ 20211008  
Time 19.16  
INSTRUM cryo500  
PROBHD 5 mm CPTCI 1H-  
PULPROG zg30  
TD 81728  
SOLVENT CDCl3  
NS 8  
DS 2  
SWH 8012.820 Hz  
FIDRES 0.098043 Hz  
AQ 5.0998273 sec  
RG 7.1  
DW 62.400 usec  
DE 6.00 usec  
TE 298.0 K  
D1 0.10000000 sec  
MCREST 0 sec  
MCWRK 0.01500000 sec

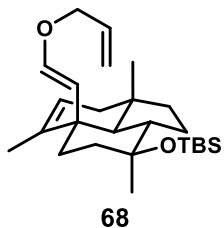

==== CHANNEL f1 =====  
NUC1 1H  
P1 9.75 usec  
PL1 1.60 dB  
SFO1 500.2235015 MHz

F2 - Processing parameters  
SI 65536  
SF 500.2200311 MHz  
WDW EM  
SSB 0  
LB 0.30 Hz  
GB 0  
PC 1.00

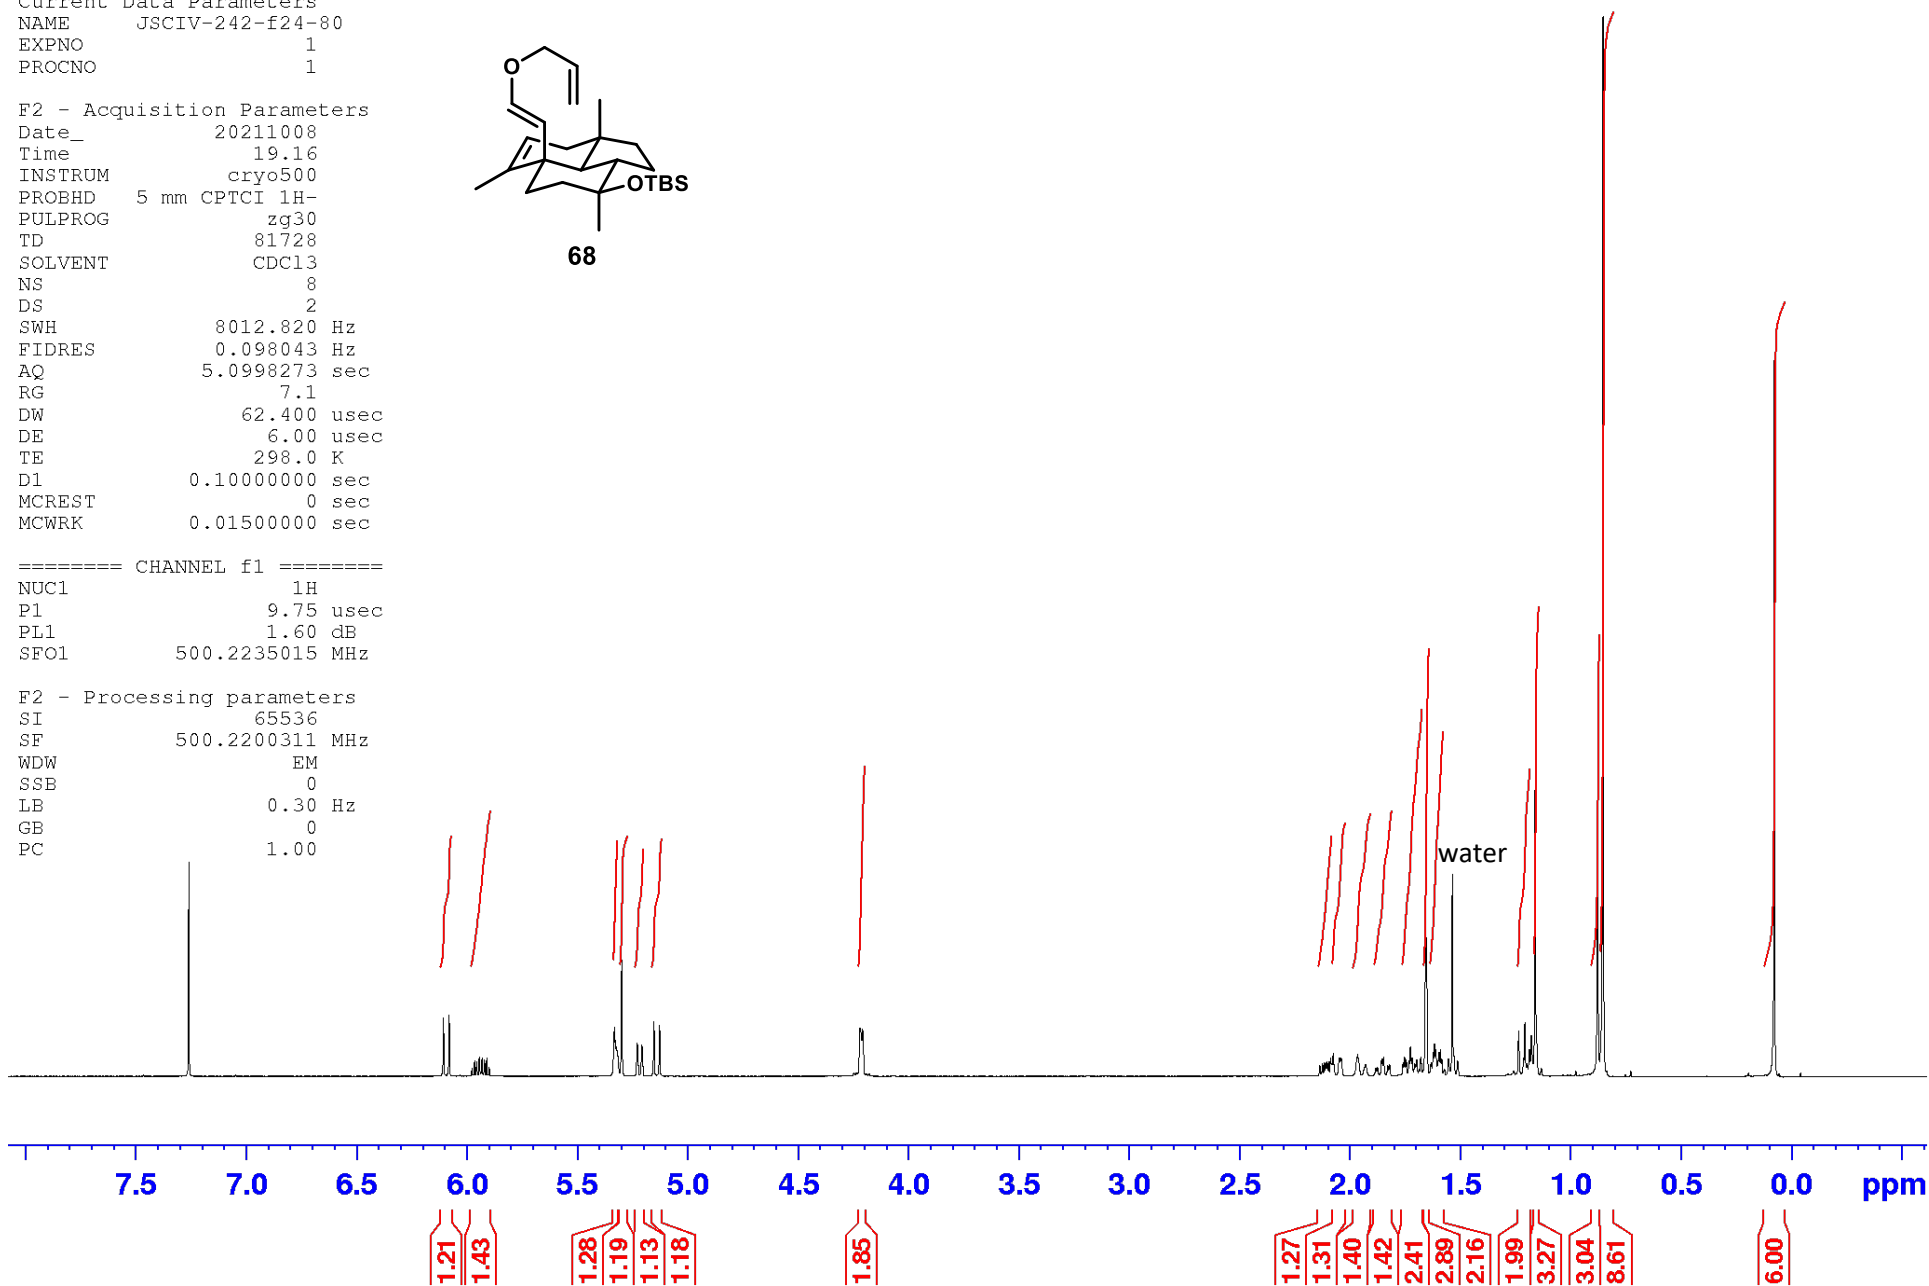



Current Data Parameters  
NAME JSCIV-242-f24-80  
EXPNO 2  
PROCNO 1

F2 - Acquisition Parameters  
Date\_ 20211008  
Time\_ 19.20  
INSTRUM cryo500  
PROBHD 5 mm CPTCI 1H-  
PULPROG SpinEchopg30gp2.prd  
TD 65536  
SOLVENT cdc13  
NS 120  
DS 16  
SWH 30303.031 Hz  
FIDRES 0.462388 Hz  
AQ 1.0813440 sec  
RG 7298.2  
DW 16.500 usec  
DE 6.00 usec  
TE 298.0 K  
D1 0.25000000 sec  
d11 0.03000000 sec  
D16 0.00020000 sec  
d17 0.00019600 sec  
MCREST 0 sec  
MCWRK 0.01500000 sec  
P2 37.70 usec

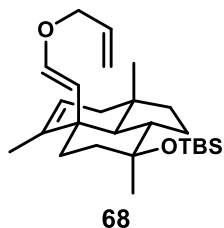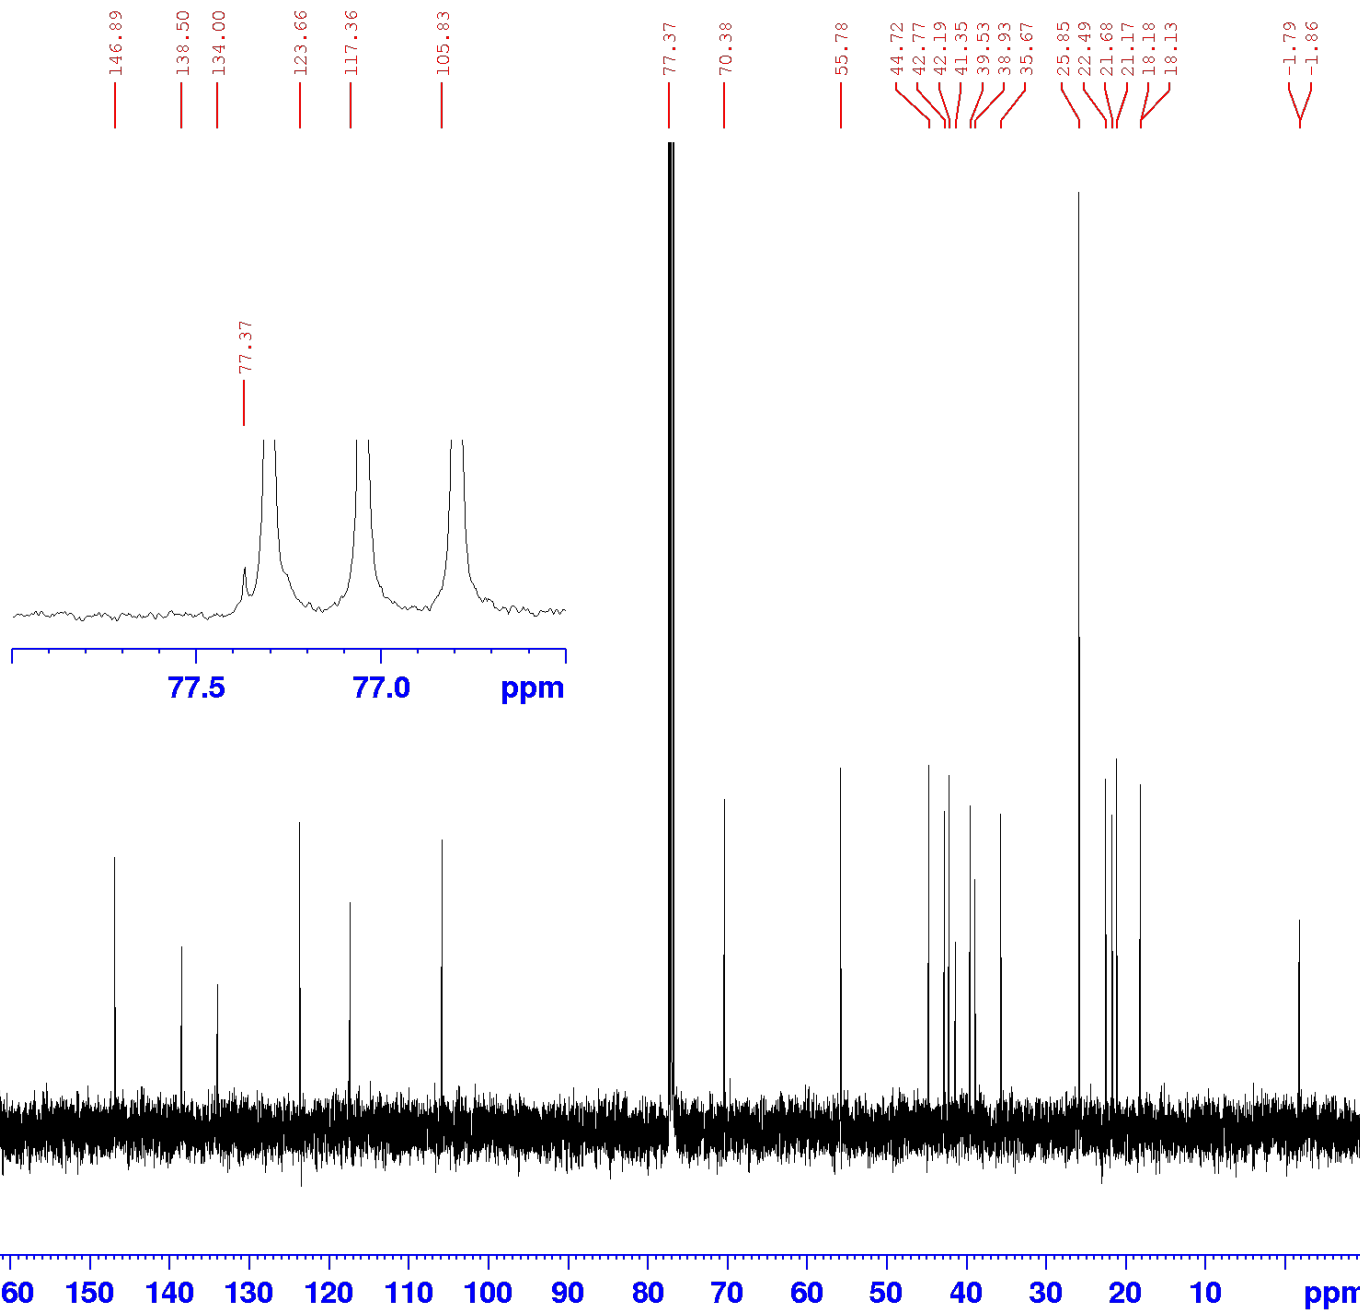

Current Data Parameters  
NAME JSCIV-197-f4-7  
EXPNO 1  
PROCNO 1

F2 - Acquisition Parameters

Date\_ 20210907  
Time 19.05  
INSTRUM av600  
PROBHD 5 mm CPBBO BB-  
PULPROG zg30  
TD 48074  
SOLVENT CDC13  
NS 16  
DS 2  
SWH 9615.385 Hz  
FIDRES 0.200012 Hz  
AQ 2.4998479 sec  
RG 10  
DW 52.000 usec  
DE 14.23 usec  
TE 298.0 K  
D1 3.00000000 sec  
TD0 1

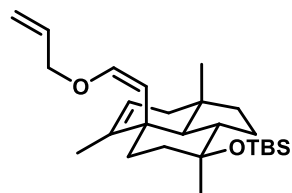

S19

==== CHANNEL f1 =====

SFO1 600.1342009 MHz  
NUC1 1H  
P1 9.50 usec  
PLW1 30.00000000 W

F2 - Processing parameters

SI 65536  
SF 600.1300352 MHz  
WDW EM  
SSB 0  
LB 0.30 Hz  
GB 0  
PC 1.00

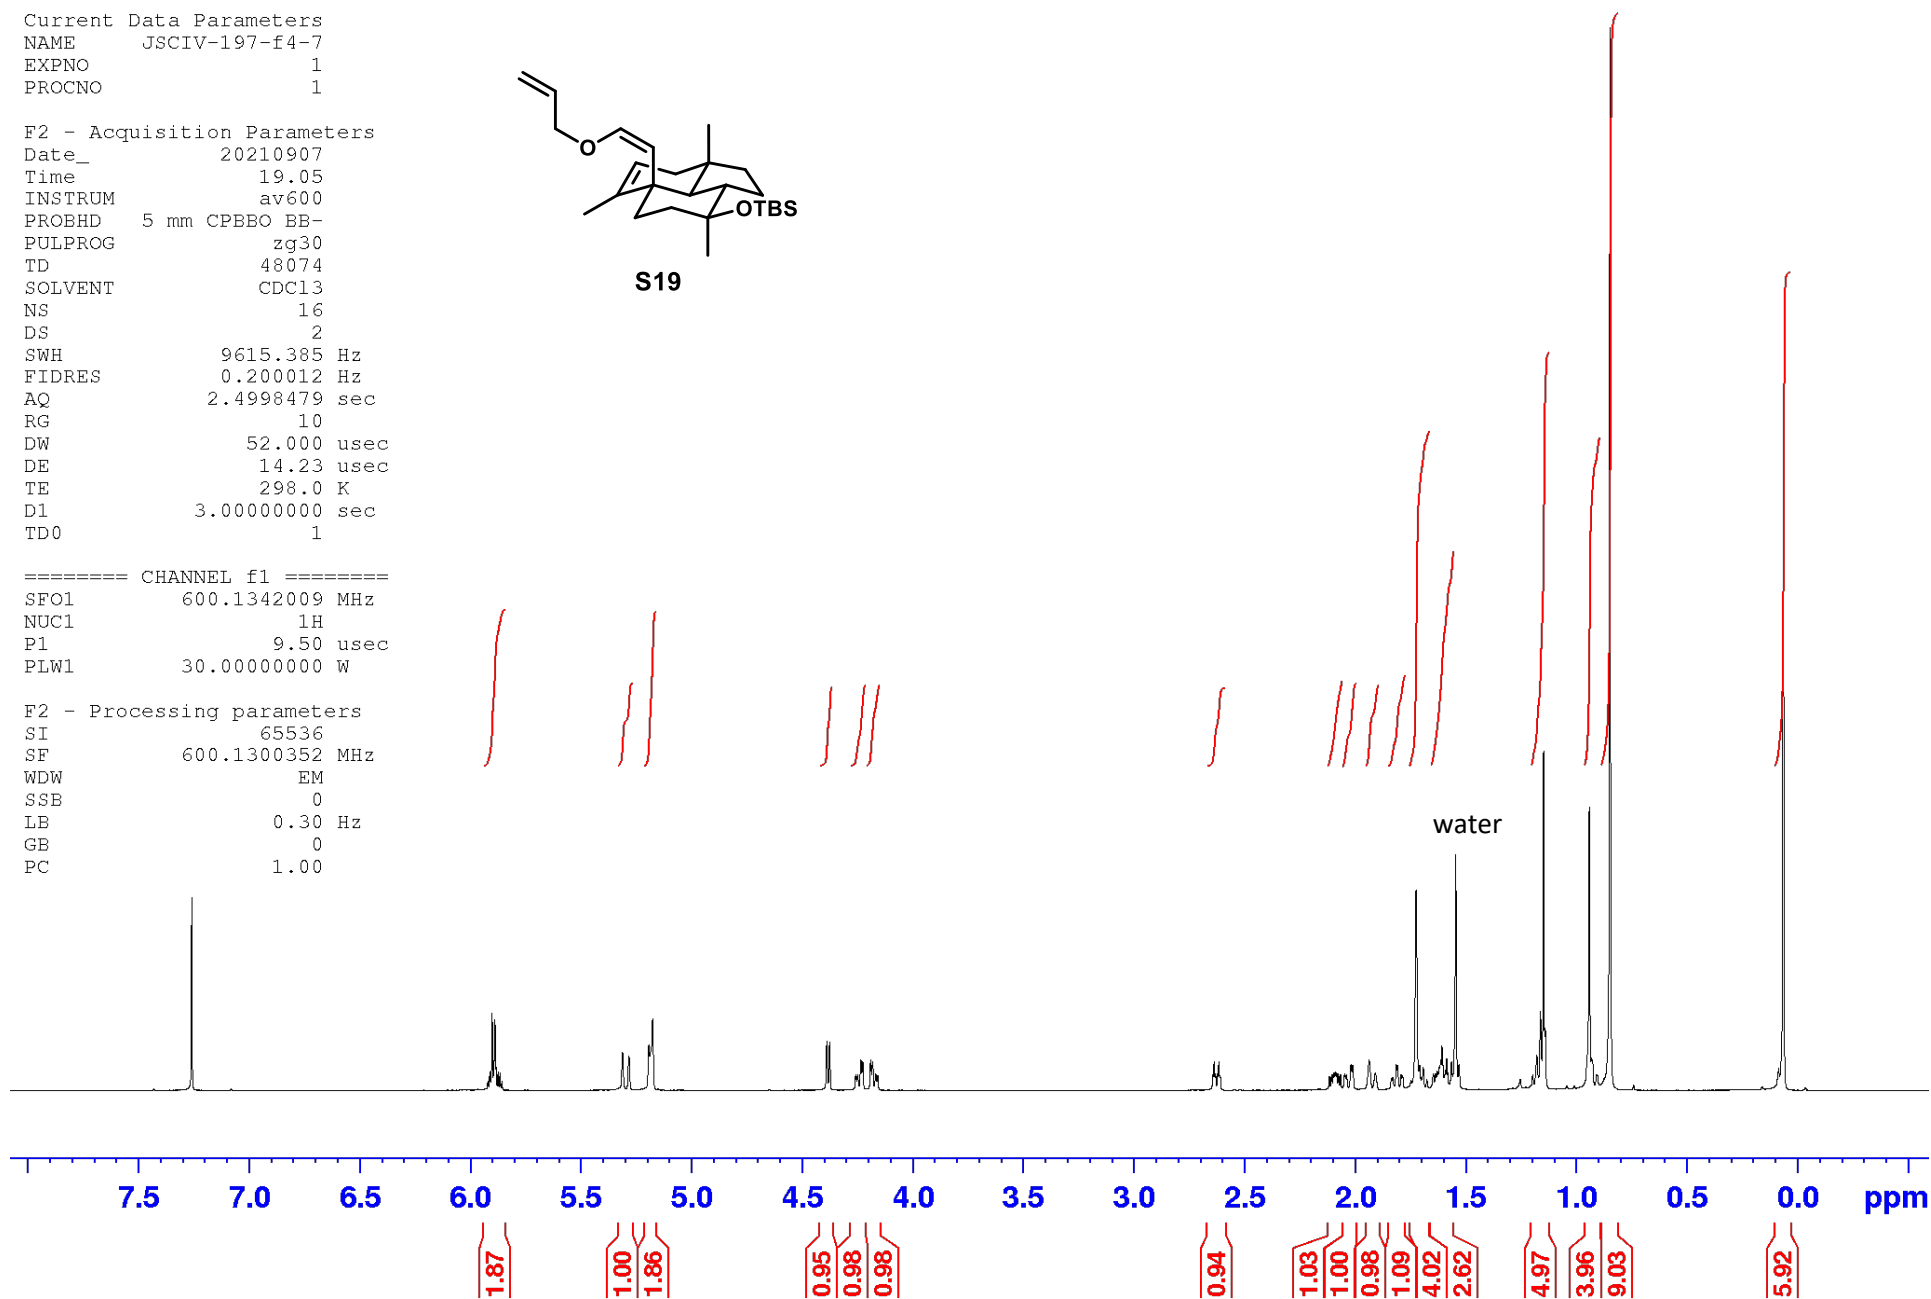

Current Data Parameters  
NAME JSCV-146-col2-f2-6  
EXPNO 2  
PROCNO 1

F2 - Acquisition Parameters  
Date\_ 20220521  
Time 14.55  
INSTRUM av600  
PROBHD 5 mm CPBBO BB-  
PULPROG zgdc30  
TD 65536  
SOLVENT CDCl3  
NS 198  
DS 4  
SWH 36231.883 Hz  
FIDRES 0.552855 Hz  
AQ 0.9043968 sec  
RG 2050  
DW 13.800 usec  
DE 19.63 usec  
TE 297.9 K  
D1 0.40000001 sec  
D11 0.03000000 sec  
TDO 1

===== CHANNEL f1 =====  
SFO1 150.9194080 MHz  
NUC1 13C  
P1 10.10 usec  
PLW1 64.00000000 W

===== CHANNEL f2 =====  
SFO2 600.1330010 MHz  
NUC2 1H  
CPDPRG[2] waltz16  
PCPD2 80.00 usec  
PLW2 30.00000000 W  
PLW12 0.37154001 W

F2 - Processing parameters  
SI 65536  
SF 150.9027932 MHz  
WDW EM  
SSB 0  
LB 1.00 Hz  
GB 0  
PC 1.00

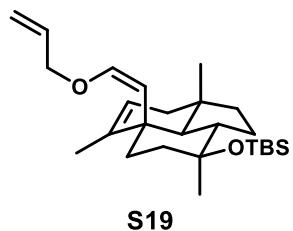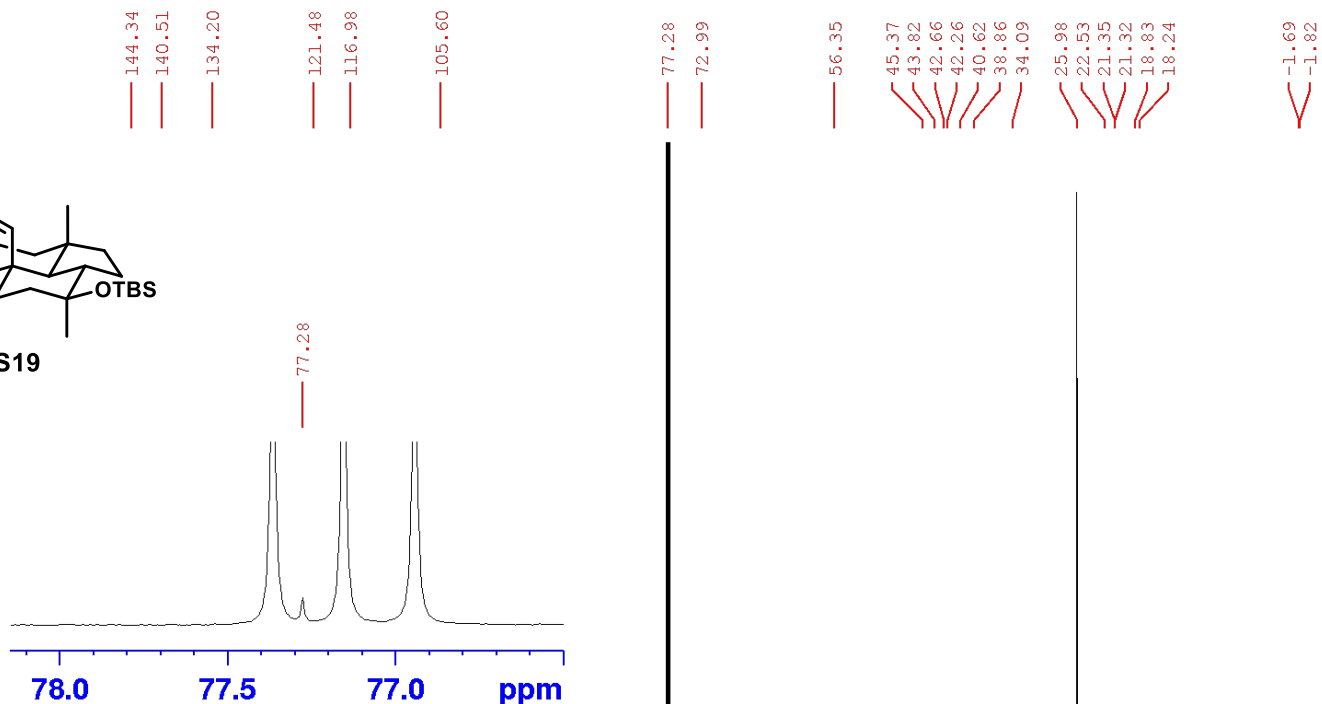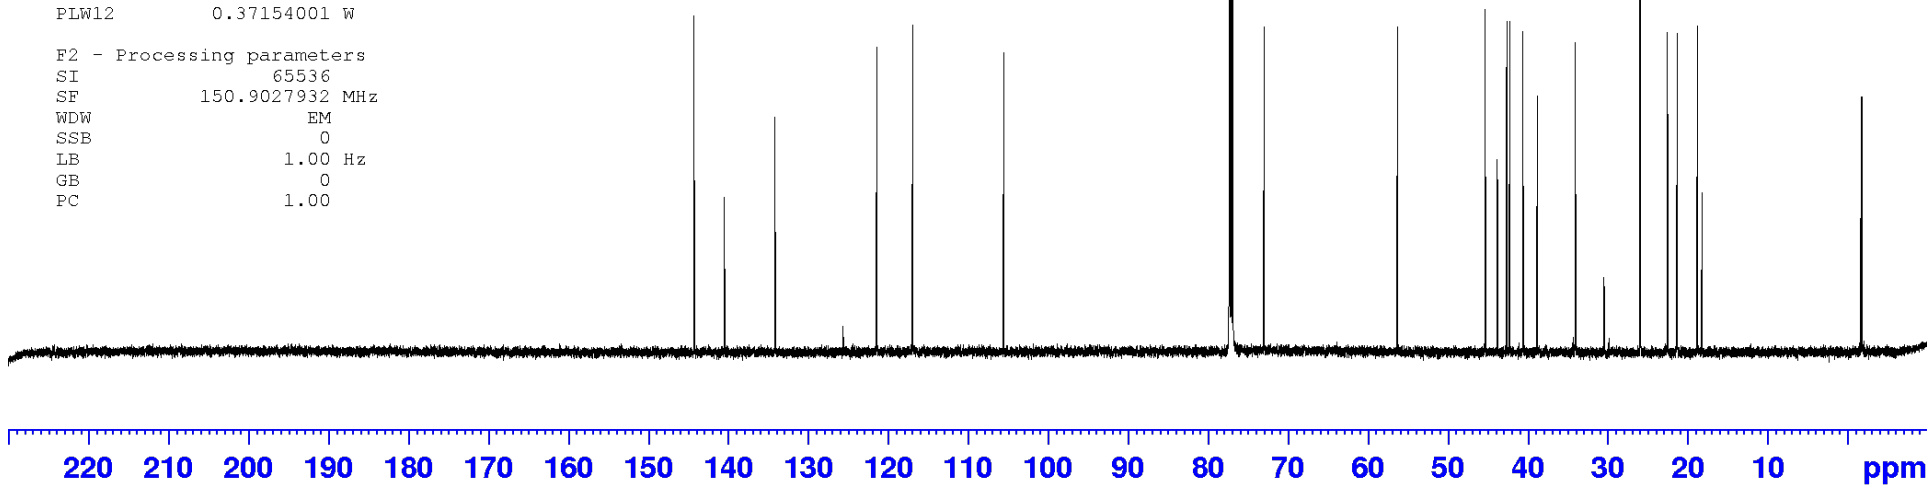

Current Data Parameters  
NAME JC 5-007 claisen TOP col  
EXPNO 1  
PROCNO 1

F2 - Acquisition Parameters

Date\_ 20210428  
Time 20.55  
INSTRUM av600  
PROBHD 5 mm CPBBO BB-  
PULPROG zg30  
TD 98074  
SOLVENT CDCl3  
NS 8  
DS 2  
SWH 9615.385 Hz  
FIDRES 0.098042 Hz  
AQ 5.0998478 sec  
RG 9  
DW 52.000 usec  
DE 13.70 usec  
TE 298.0 K  
D1 0.10000000 sec  
TDO 1

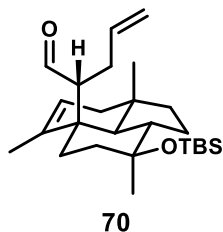

==== CHANNEL f1 =====

SFO1 600.1342009 MHz  
NUC1 1H  
P1 12.00 usec  
PLW1 28.00000000 W

F2 - Processing parameters

SI 65536  
SF 600.1300344 MHz  
WDW EM  
SSB 0  
LB 0.30 Hz  
GB 0  
PC 1.00

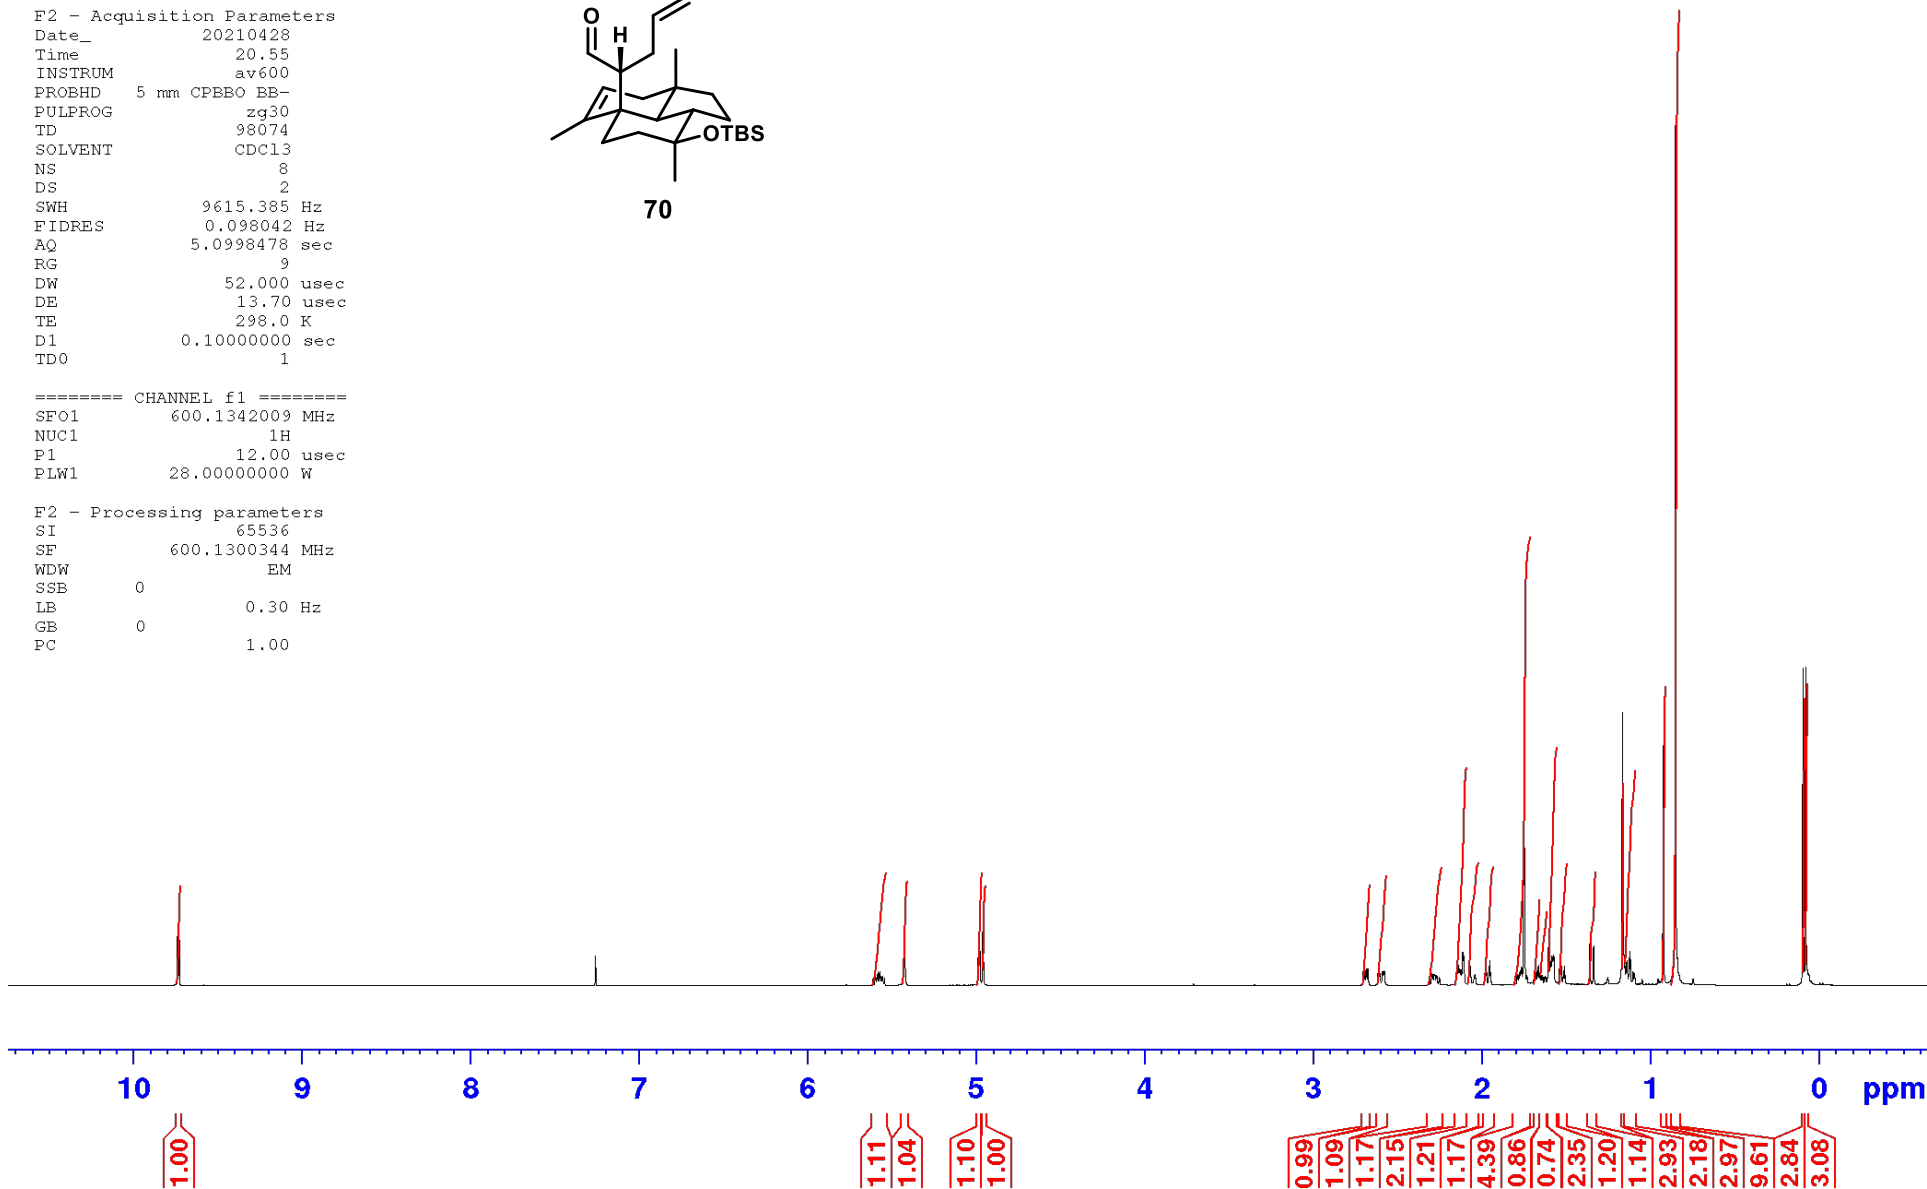

Current Data Parameters  
 NAME JC 5-007 claisen TOP col  
 EXPNO 2  
 PROCNO 1

F2 - Acquisition Parameters  
 Date\_ 20210428  
 Time 21.00  
 INSTRUM av600  
 PROBHD 5 mm CPBBO BB-  
 PULPROG zgpg30  
 TD 65536  
 SOLVENT CDCl3  
 NS 168  
 DS 4  
 SWH 36231.883 Hz  
 FIDRES 0.552855 Hz  
 AQ 0.9043968 sec  
 RG 2050  
 DW 13.800 usec  
 DE 19.65 usec  
 TE 298.0 K  
 D1 0.40000001 sec  
 D11 0.03000000 sec  
 TD0 1

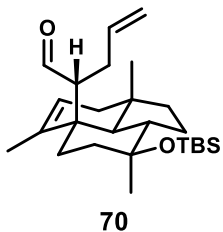

==== CHANNEL f1 =====  
 SFO1 150.9194075 MHz  
 NUC1 13C  
 P1 10.00 usec  
 PLW1 65.00000000 W

==== CHANNEL f2 =====  
 SFO2 600.1330010 MHz  
 NUC2 1H  
 CPDPRG[2] waltz16  
 PCPD2 80.00 usec  
 PLW2 28.00000000 W  
 PLW12 0.63000000 W

F2 - Processing parameters  
 SI 65536  
 SF 150.9027935 MHz  
 WDW EM  
 SSB 0  
 LB 1.00 Hz  
 GB 0  
 PC 1.00

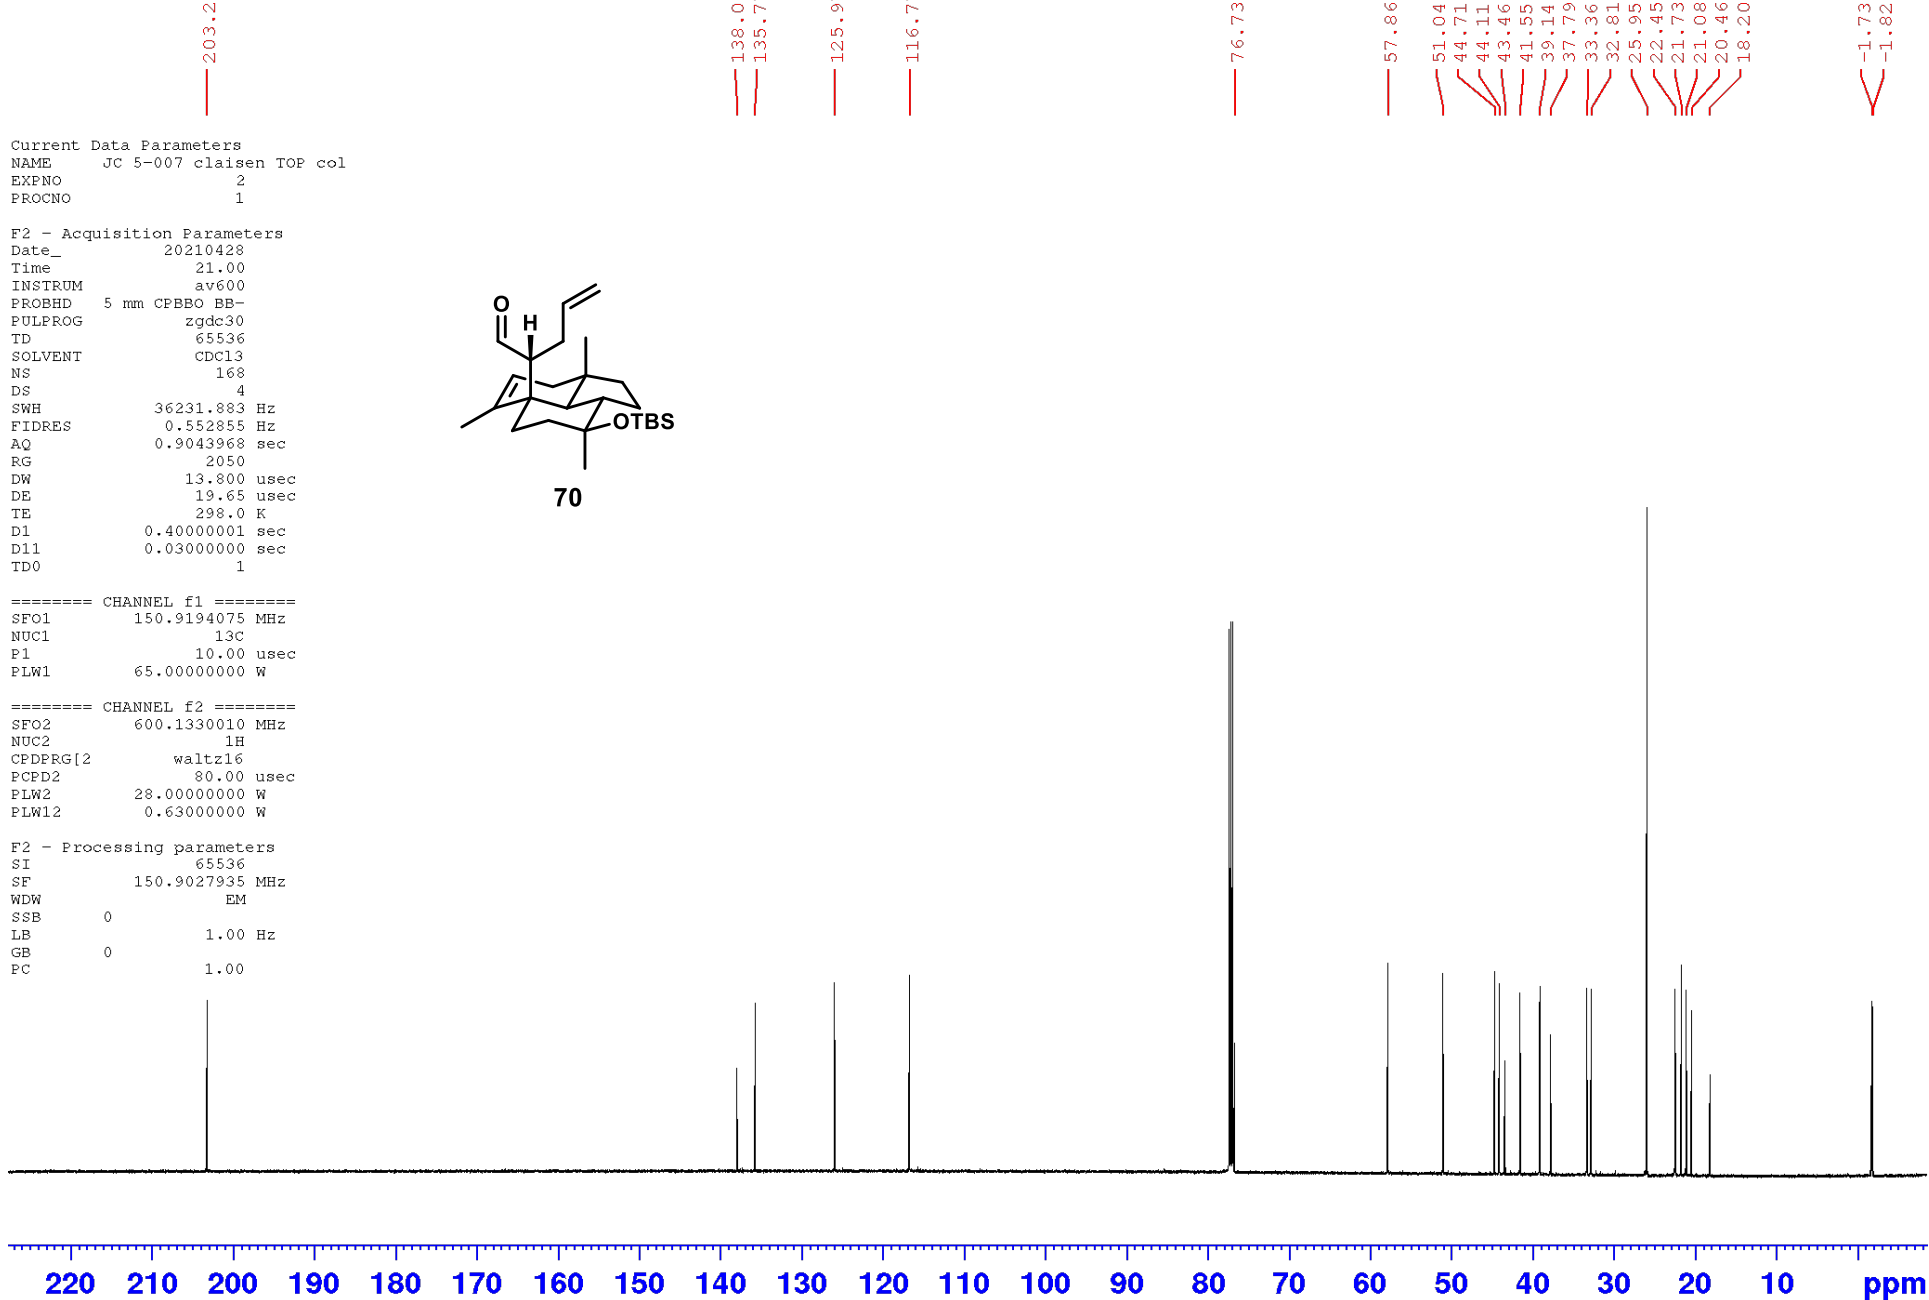

Current Data Parameters  
NAME JC 5-065 bot  
EXPNO 1  
PROCNO 1

F2 - Acquisition Parameters  
Date\_ 20210708  
Time 23.53  
INSTRUM cryo500  
PROBHD 5 mm CPTCI 1H-  
PULPROG zg30  
TD 16022  
SOLVENT CDCl3  
NS 8  
DS 2  
SWH 8012.820 Hz  
FIDRES 0.500114 Hz  
AQ 0.9997728 sec  
RG 5  
DW 62.400 usec  
DE 6.00 usec  
TE 298.0 K  
D1 0.10000000 sec  
MCREST 0 sec  
MCWRK 0.01500000 sec

===== CHANNEL f1 =====  
NUC1 1H  
P1 9.75 usec  
PL1 1.60 dB  
SFO1 500.2235015 MHz

F2 - Processing parameters  
SI 65536  
SF 500.2200315 MHz  
WDW EM  
SSB 0  
LB 0.30 Hz  
GB 0  
PC 1.00

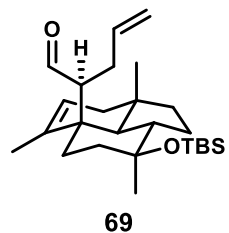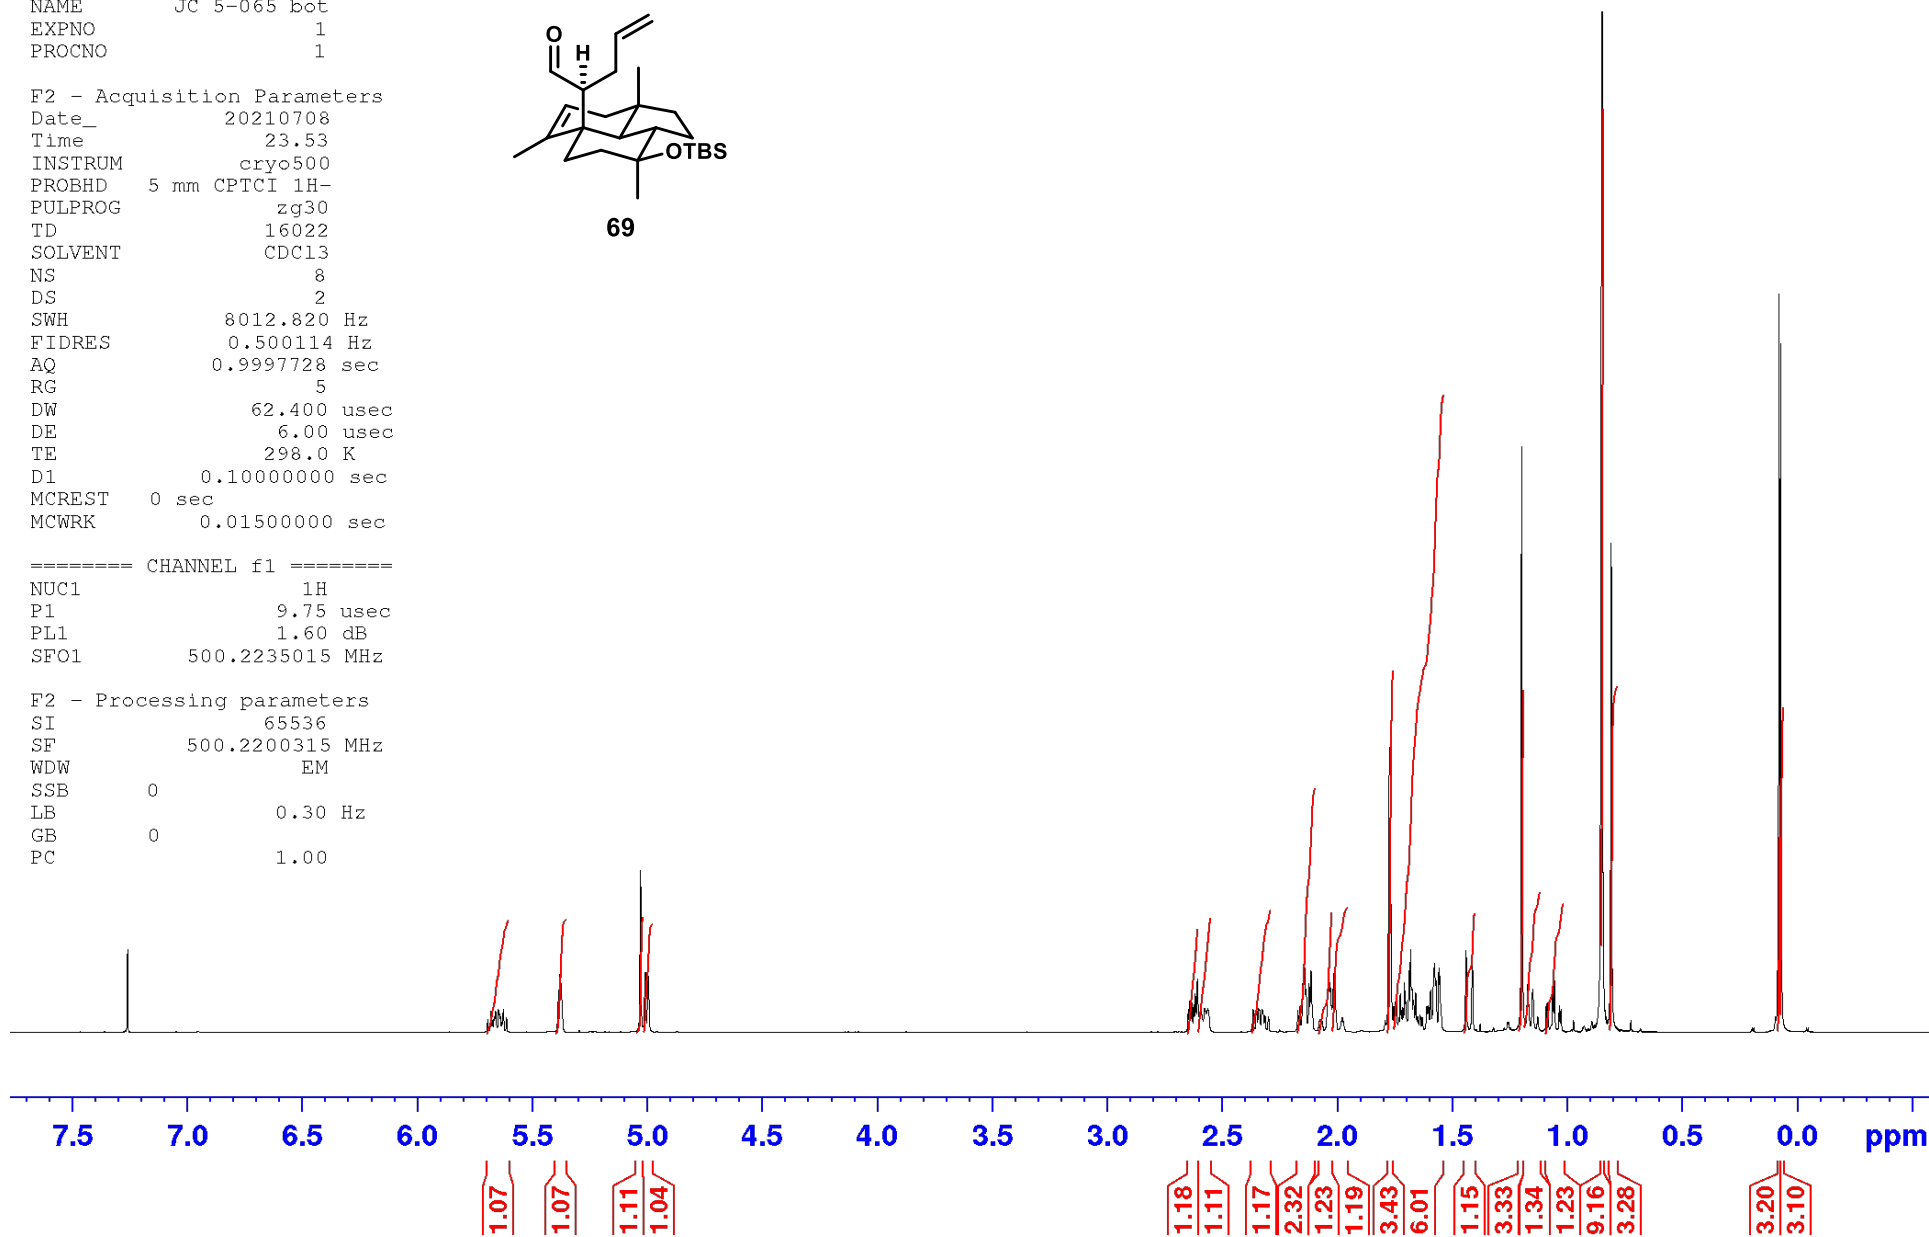

Current Data Parameters  
NAME Jc 5-065 bot  
EXPROG 2  
PROCNO 1

F2 - Acquisition Parameters  
Date\_ 20210708  
Time 23.55  
INSTRUM cryo500  
PROBHD 5 mm CPCT 1H-  
PULPROG SpinEchoep20pp2.prd  
ID 65536  
SOLVENT CDCl3  
NS 77  
DS 16  
SWH 30303.031 Hz  
FIDRES 0.462388 Hz  
AQ 1.0813440 sec  
RG 7298.2  
DM 16.500 usec  
DE 6.00 usec  
TE 298.0 K  
D1 0.25000000 sec  
d11 0.03000000 sec  
D16 0.00020000 sec  
d17 0.00019000 sec  
MREST 0 sec  
MCWK 0.01500000 sec  
F2 37.70 usec

===== CHANNEL f1 =====  
NUC1 13C  
P1 18.85 usec  
PL1 2000.00 usec  
P2 500.00 usec  
PL0 120.00 dB  
PL1 -1.00 dB  
SFO1 125.7942548 MHz  
SP2 1.55 dB  
SP4 1.55 dB  
SFRM[2] Cyp60comp.4  
SENAM[4] Cyp60.0.5.20.1  
SFOFF2 0 Hz  
SFOFF4 0 Hz

===== CHANNEL f2 =====  
CPDPRG2 waltz16  
NUC2 1H  
PCPD2 100.00 usec  
PL2 1.60 dB  
PL12 22.00 dB  
SFO2 500.2225011 MHz

===== GRADIENT CHANNEL =====  
GPNAM[1] SINE.100  
GPNAM[2] SINE.100  
GPX1 0 %  
GPX2 0 %  
GPY1 0 %  
GPY2 0 %  
GPF1 30.00 %  
GPE2 50.00 %  
p15 500.00 usec  
p16 1000.00 usec

F2 - Processing parameters  
SI 65536  
SF 125.7804062 MHz  
WDW EM  
SSB 0  
LB 1.00 Hz  
GB 0  
PC 2.00

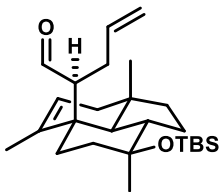

69

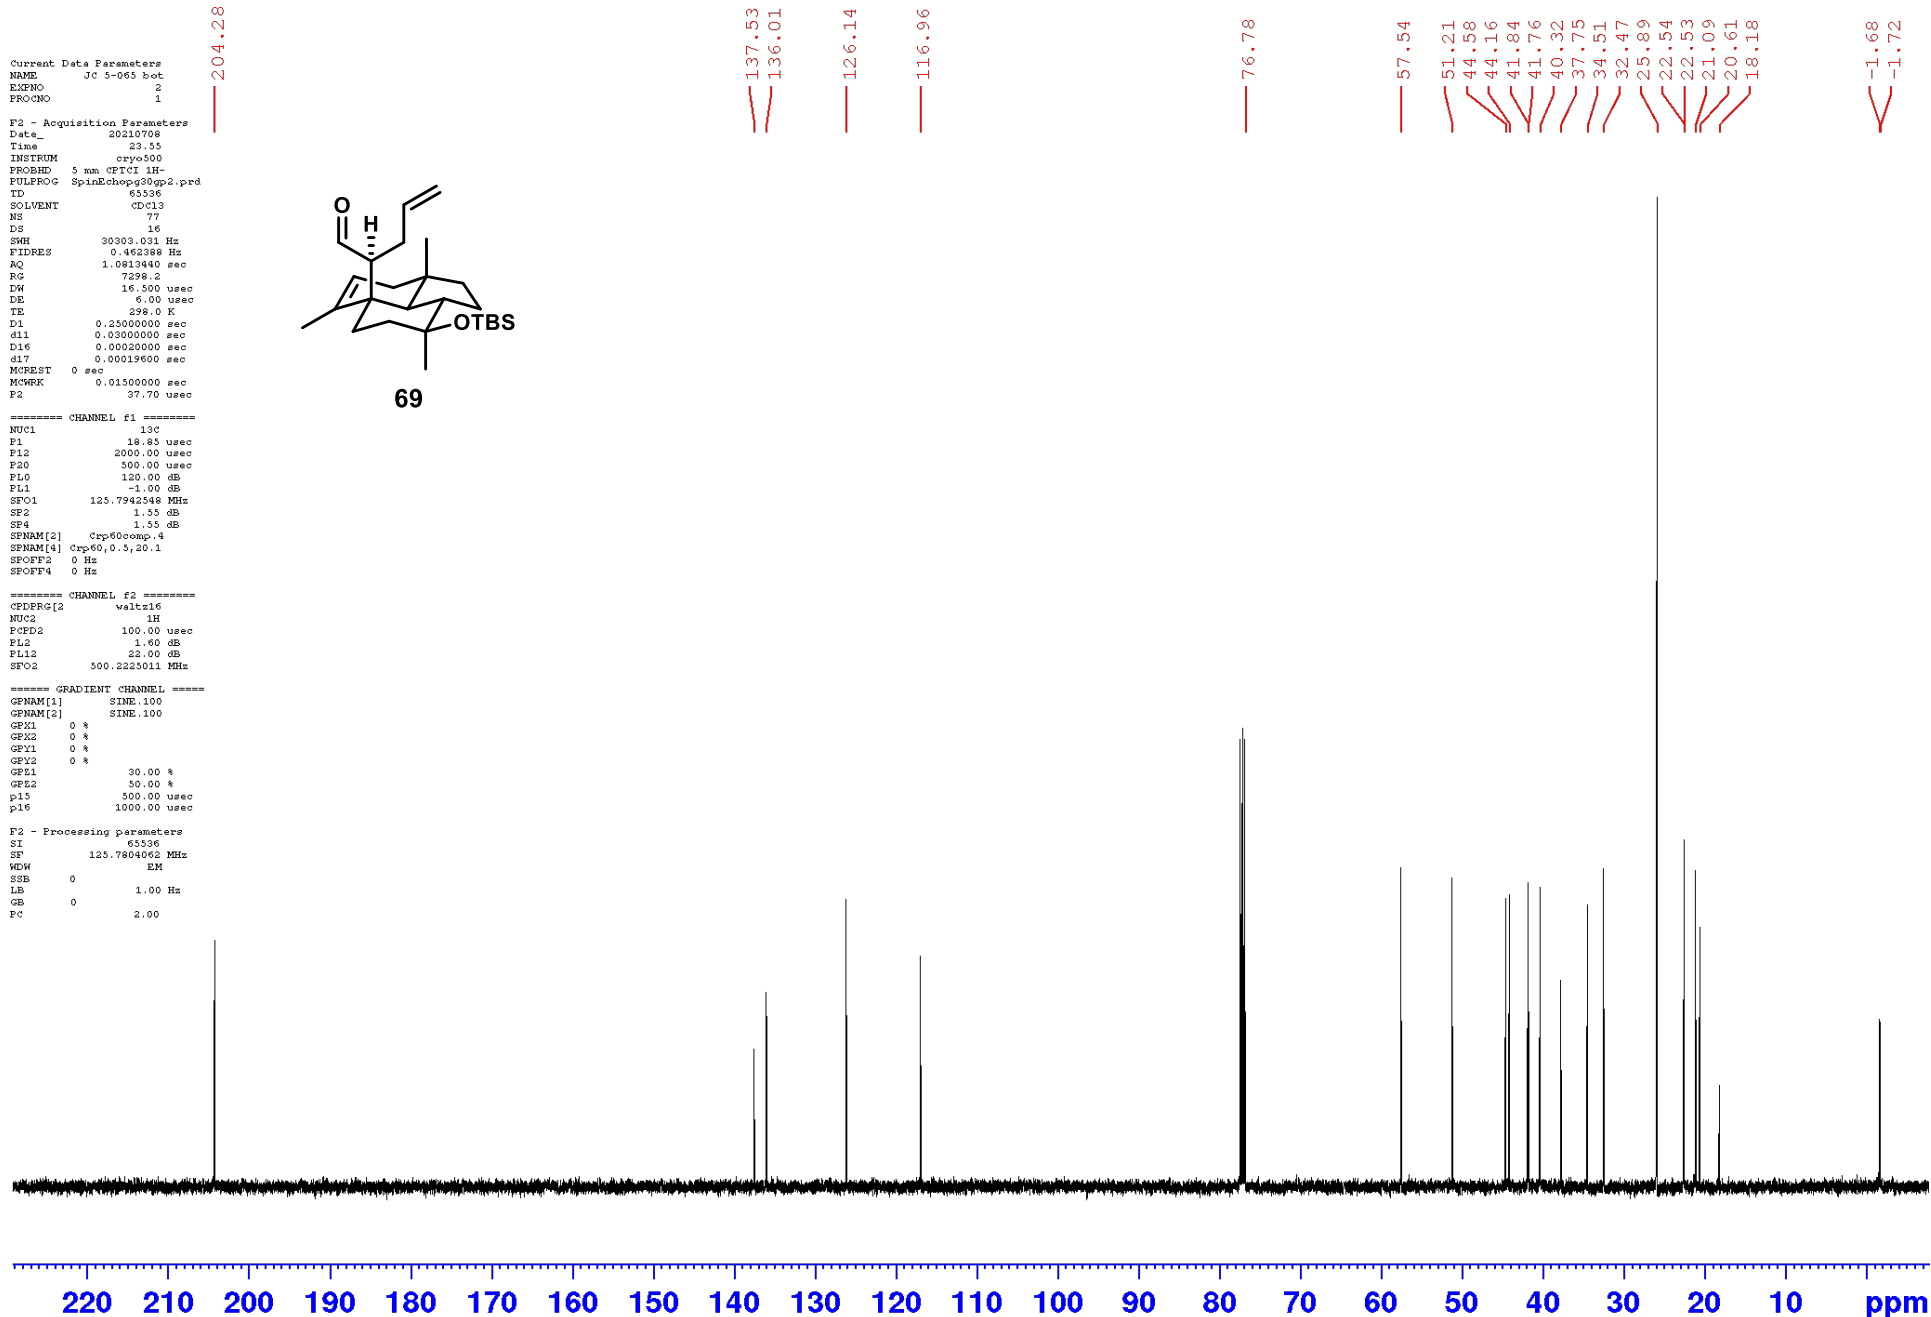

Current Data Parameters  
NAME JC 5-067 cr LAH  
EXPNO 1  
PROCNO 1

F2 - Acquisition Parameters  
Date\_ 20210621  
Time 2.27  
INSTRUM cryo500  
PROBHD 5 mm CPTCI 1H-  
PULPROG zg30  
TD 16022  
SOLVENT CDC13  
NS 8  
DS 2  
SWH 8012.820 Hz  
FIDRES 0.500114 Hz  
AQ 0.9997728 sec  
RG 3.6  
DW 62.400 usec  
DE 6.00 usec  
TE 298.0 K  
D1 0.10000000 sec  
MCREST 0 sec  
MCWRK 0.01500000 sec

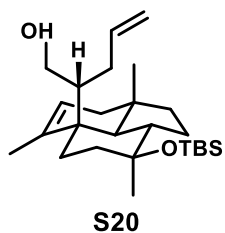

==== CHANNEL f1 =====  
NUC1 1H  
P1 9.75 usec  
PL1 1.60 dB  
SFO1 500.2235015 MHz

F2 - Processing parameters  
SI 65536  
SF 500.2200309 MHz  
WDW EM  
SSB 0  
LB 0.30 Hz  
GB 0  
PC 1.00

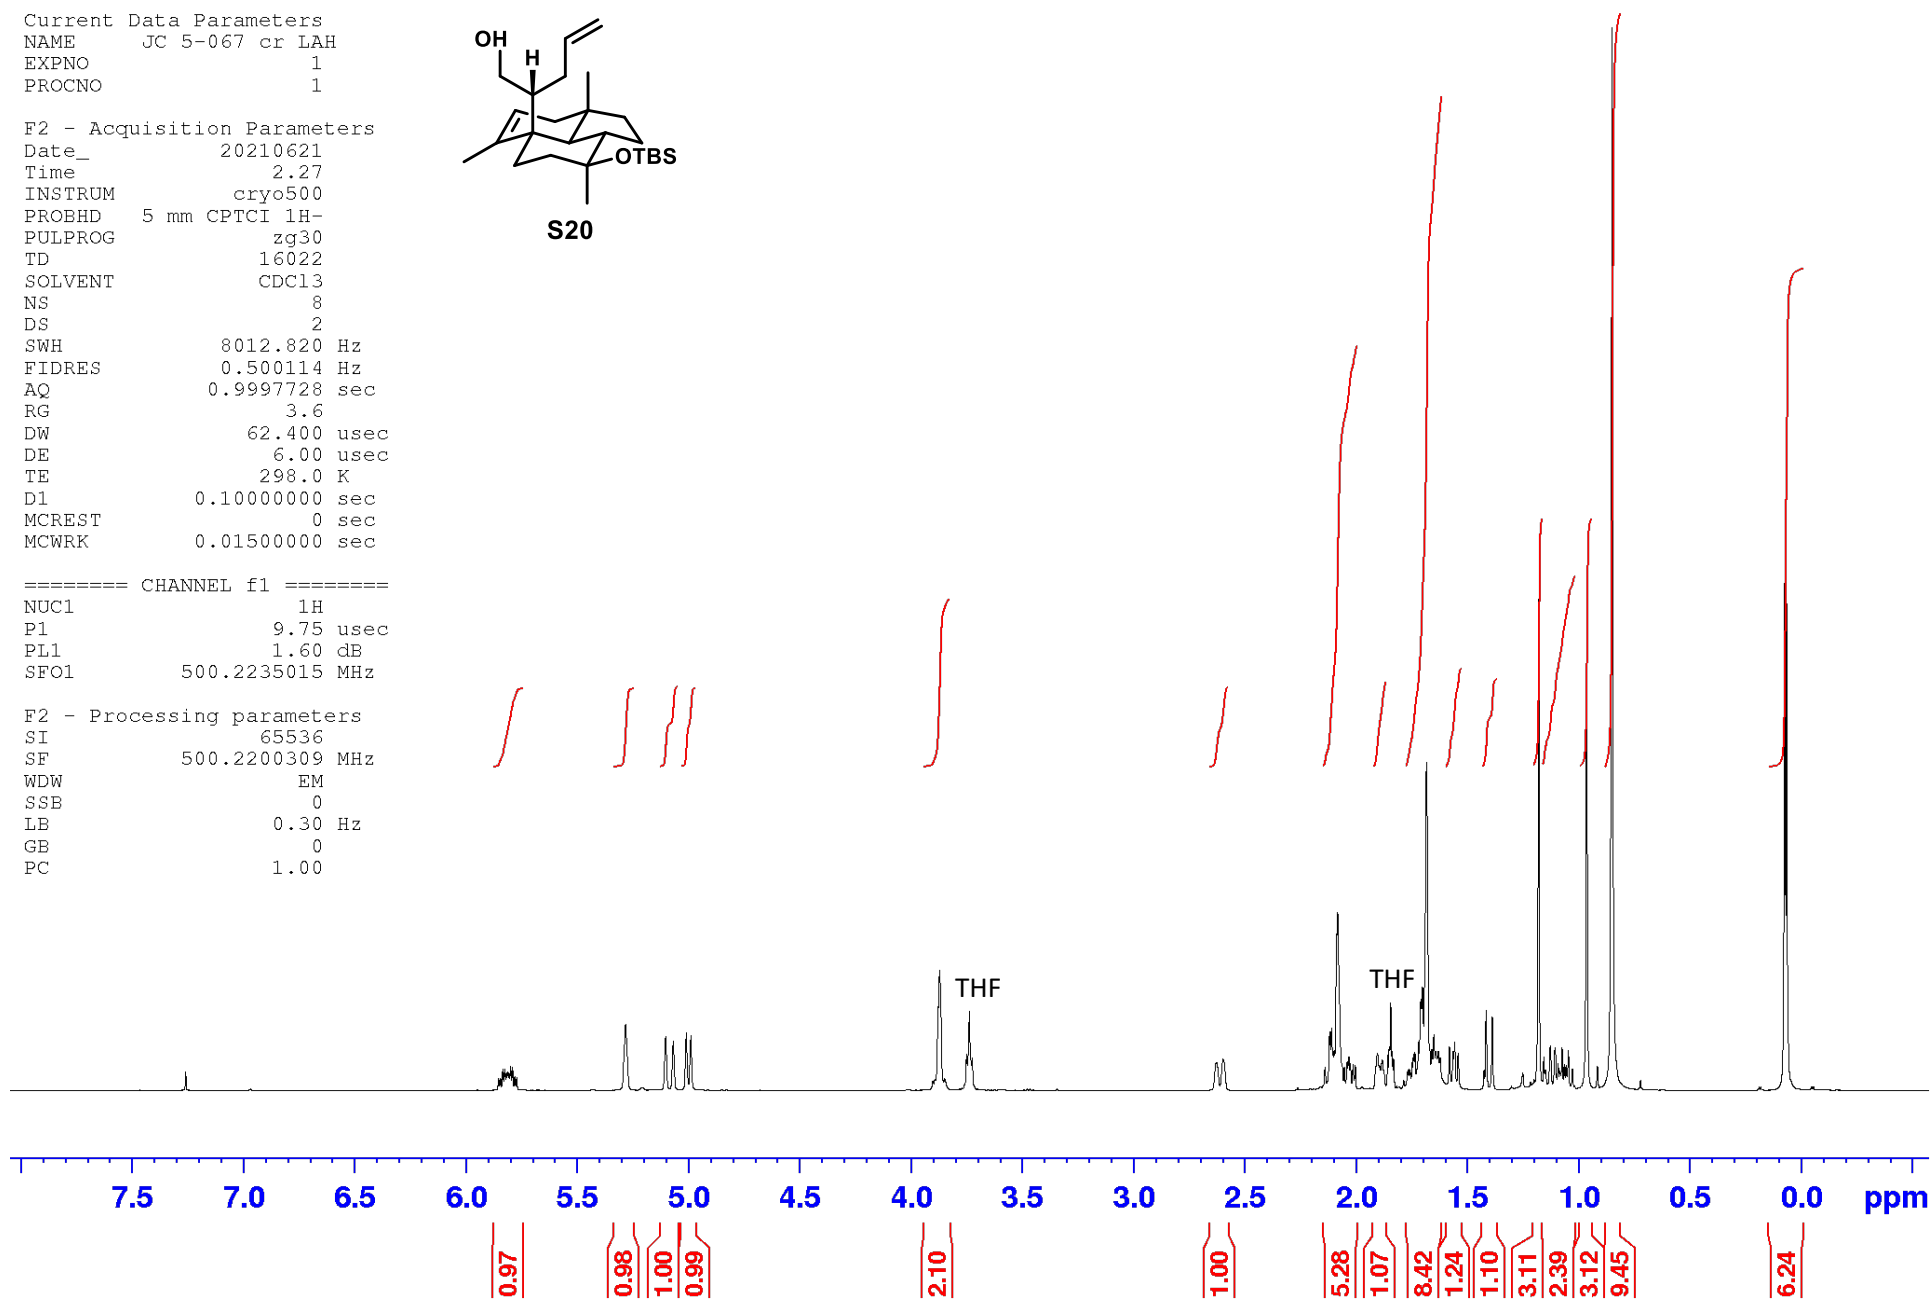



Current Data Parameters  
NAME JC 5-067 cr 1AH  
EXPNO 2  
PROCNO 1

F2 - Acquisition Parameters  
Date\_ 20210621  
Time 2.29  
INSTRUM cryo500  
PROBHD 5 mm CPTCI 1H-  
PULPROG SpinEchoq30gp2.prd  
TD 65536  
SOLVENT CDCl3  
NS 36  
DS 16  
SWH 30303.031 Hz  
FIDRES 0.462388 Hz  
AQ 1.0813440 sec  
RG 2580.3  
DW 16.500 usec  
DE 6.00 usec  
TE 298.0 K  
D1 0.25000000 sec  
d11 0.03000000 sec  
D16 0.00020000 sec  
d17 0.00019600 sec  
MCREST 0 sec  
MEMRK 0.01500000 sec  
F2 37.70 usec

===== CHANNEL f1 =====  
NUC1 13c  
P1 18.85 usec  
P12 2000.00 usec  
P20 500.00 usec  
PL0 120.00 dB  
PL1 -1.00 dB  
SFO1 125.7942548 MHz  
SF2 1.55 dB  
SF4 1.55 dB  
SENAM[2] Crp60comp4  
SENA[4] Crp60,0.5,20.1  
SFOFF2 0 Hz  
SFOFF4 0 Hz

===== CHANNEL f2 =====  
CPDPRG[2] waltr16  
NUC2 1H  
PCPD2 100.00 usec  
PL2 1.60 dB  
PL12 22.00 dB  
SFO2 500.2225011 MHz

===== GRADIENT CHANNEL =====  
GFNAM[1] SINE.100  
GFNAM[2] SINE.100  
GFX1 0 %  
GFX2 0 %  
GFY1 0 %  
GFY2 0 %  
GEZ1 30.00 %  
GEZ2 50.00 %  
p15 500.00 usec  
p16 1000.00 usec

F2 - Processing parameters  
SI 65536  
SF 125.7804077 MHz  
WDW EM  
SSB 0  
LB 1.00 Hz  
GB 0  
FC 2.00

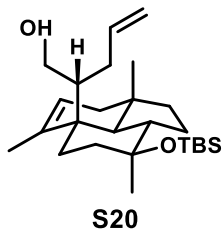

140.76  
140.24  
124.45  
115.69  
77.11  
63.71  
57.89  
45.02  
44.65  
43.09  
41.87  
41.36  
38.11  
37.78  
35.90  
33.90  
25.96  
22.79  
21.83  
20.83  
20.35  
18.21  
1.67  
1.70

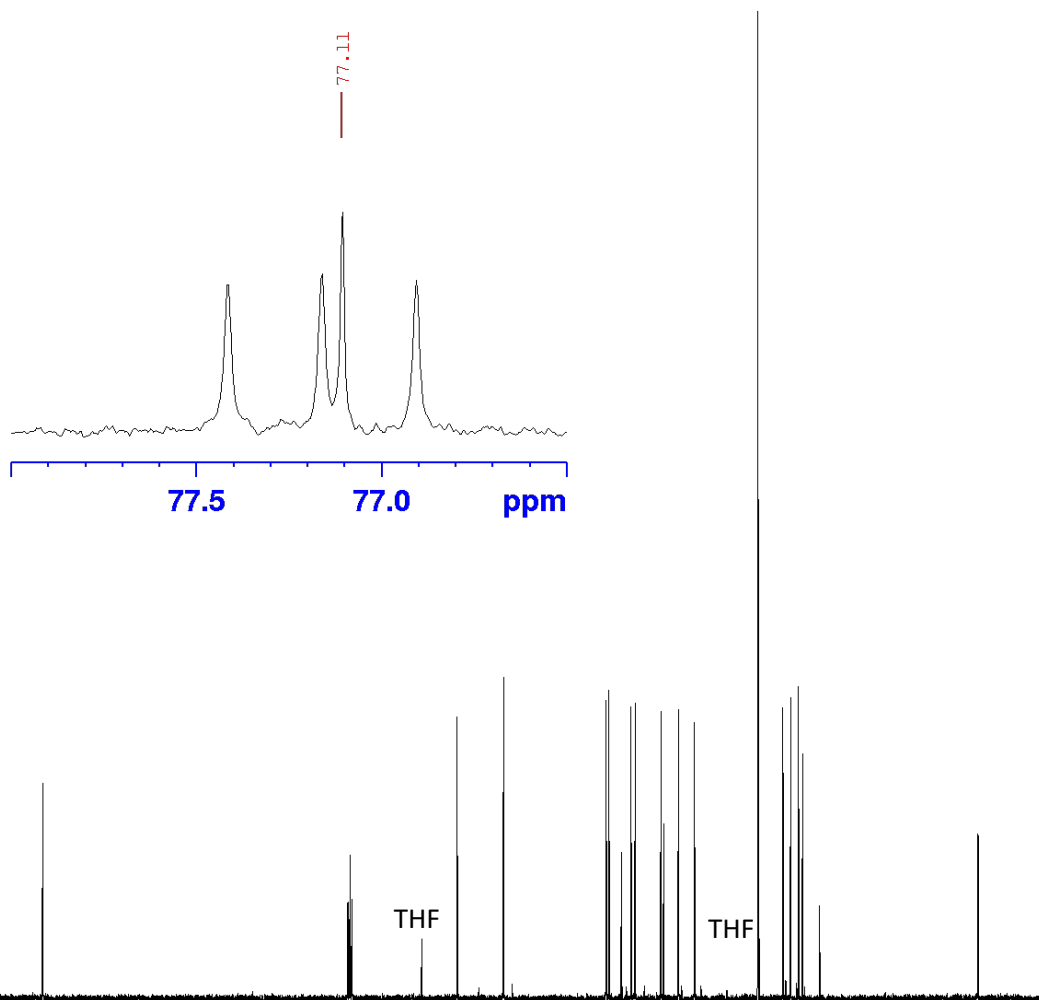

220 210 200 190 180 170 160 150 140 130 120 110 100 90 80 70 60 50 40 30 20 10 ppm

Current Data Parameters  
NAME JC 5-009 Ms col  
EXPNO 1  
PROCNO 1

F2 - Acquisition Parameters  
Date\_ 20210504  
Time 0.10  
INSTRUM av600  
PROBHD 5 mm CPBBO BB-  
PULPROG zg30  
TD 98074  
SOLVENT CDCl3  
NS 8  
DS 2  
SWH 9615.385 Hz  
FIDRES 0.098042 Hz  
AQ 5.0998478 sec  
RG 9  
DW 52.000 usec  
DE 13.70 usec  
TE 298.0 K  
D1 0.10000000 sec  
TD0 1

==== CHANNEL f1 =====  
SFO1 600.1342009 MHz  
NUC1 1H  
P1 12.00 usec  
PLW1 28.00000000 W

F2 - Processing parameters  
SI 65536  
SF 600.1300342 MHz  
WDW EM  
SSB 0  
LB 0.30 Hz  
GB 0  
PC 1.00

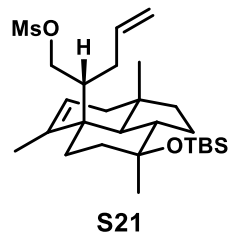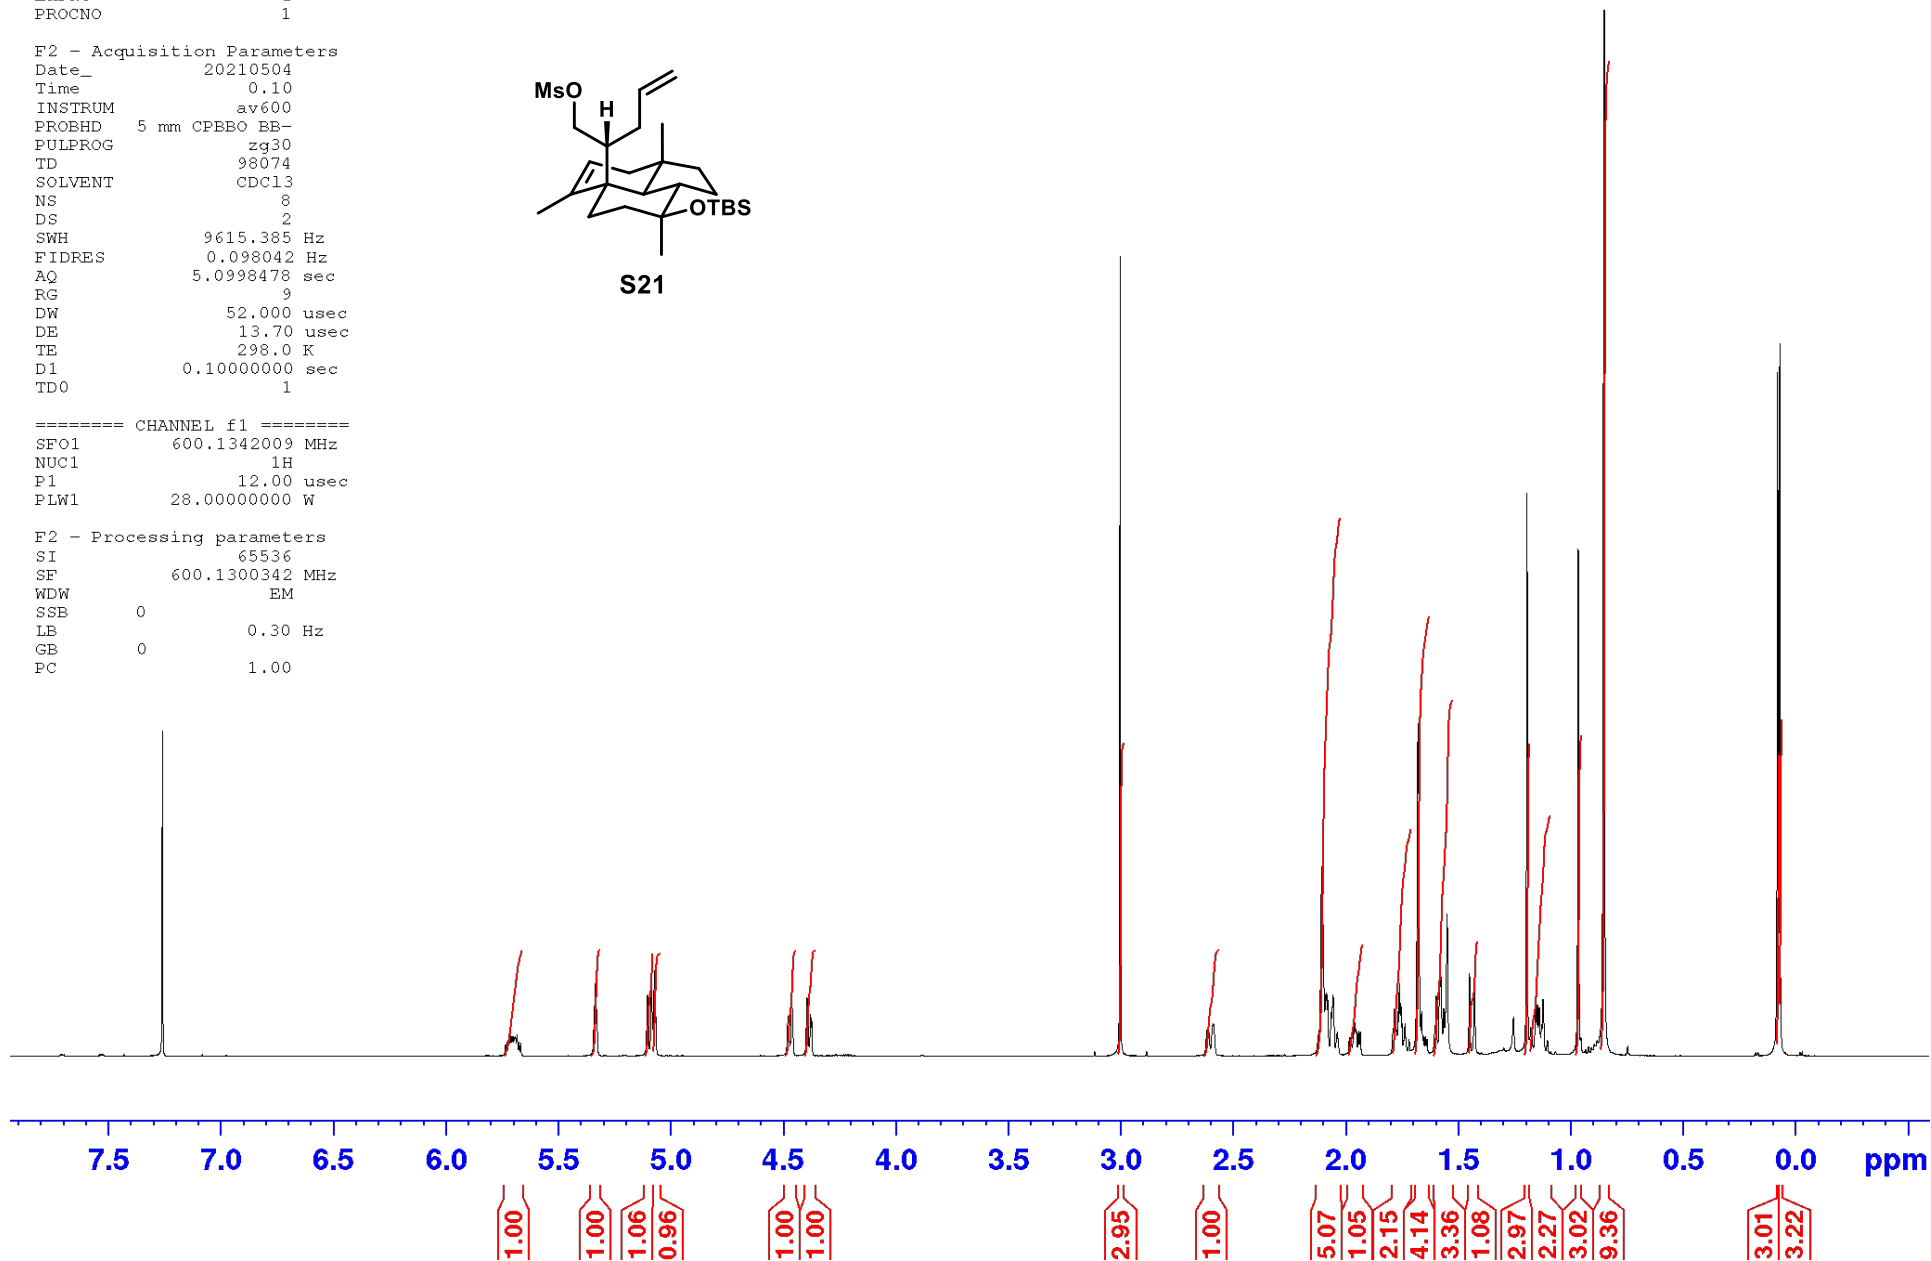

Current Data Parameters  
NAME JC 5-068 Ms col  
EXPNO 2  
PROCNO 1

F2 - Acquisition Parameters  
Date\_ 20210622  
Time 2.49  
INSTRUM cryo500  
PROBHD 5 mm CPTCI 1H-  
PULPROG SpinEchopg30gp2.prd  
TD 65536  
SOLVENT CDCl3  
NS 748  
DS 16  
SMH 30303.031 Hz  
FIDRES 0.462388 Hz  
AQ 1.0813440 sec  
RG 16384  
DM 16.500 usec  
DE 6.00 usec  
TE 298.0 K  
D1 0.25000000 sec  
d11 0.03000000 sec  
D16 0.00020000 sec  
d17 0.00019600 sec  
MCOREST 0 sec  
MCHRRK 0.01500000 sec  
P2 37.70 usec

===== CHANNEL f1 =====  
NUC1 13C  
P1 18.85 usec  
P12 2000.00 usec  
P20 500.00 usec  
PL0 120.00 dB  
PL1 -1.00 dB  
SFO1 125.7942548 MHz  
SF2 1.55 dB  
SF4 1.55 dB  
SPNAM[2] Crp60comp.4  
SPNAM[4] Crp60,0.5,20.1  
SPOFF2 0 Hz  
SPOFF4 0 Hz

===== CHANNEL f2 =====  
CPDPRG[2] waltz16  
NUC2 1H  
PCPD2 100.00 usec  
PL2 1.60 dB  
PL12 22.00 dB  
SFO2 500.2225011 MHz

===== GRADIENT CHANNEL =====  
GPNAM[1] SINE.100  
GPNAM[2] SINE.100  
GPX1 0 %  
GPX2 0 %  
GPY1 0 %  
GPY2 0 %  
GPE1 30.00 %  
GPE2 50.00 %  
p15 500.00 usec  
p16 1000.00 usec

F2 - Processing parameters  
SI 65536  
SF 125.7804064 MHz  
WDW EM  
SSB 0  
LB 1.00 Hz  
GB 0  
PC 2.00

139.75  
137.82

125.48

117.27

76.93

69.52

57.67

44.91  
44.81  
42.72  
41.84  
41.23  
37.75  
37.36  
36.10  
34.54  
33.78

25.96  
22.79  
21.66  
20.63  
20.22  
18.22

-1.65

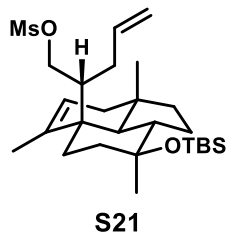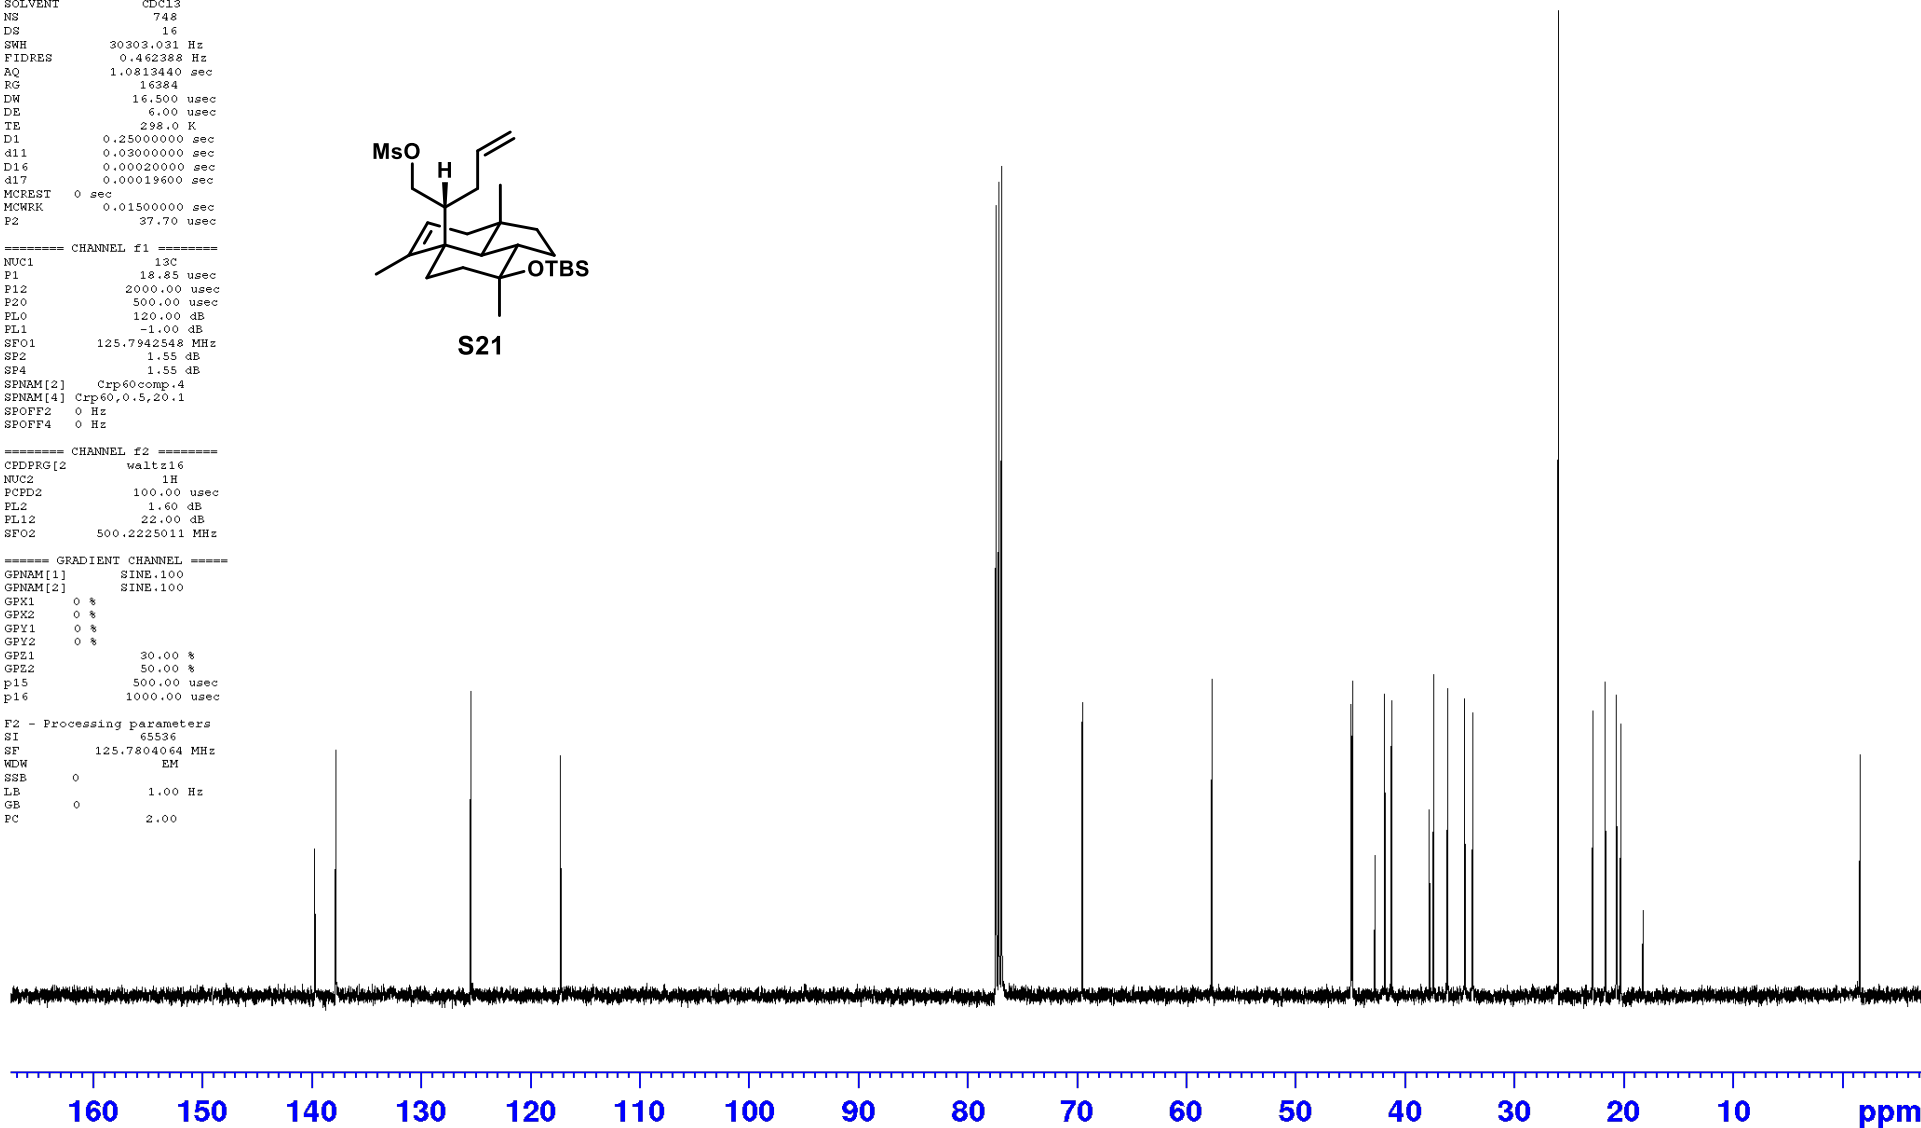

Current Data Parameters  
NAME JC 5-069 superH  
EXPNO 1  
PROCNO 1

F2 - Acquisition Parameters  
Date\_ 20210630  
Time 18.31  
INSTRUM cryo500  
PROBHD 5 mm CPTCI 1H-  
PULPROG zg30  
TD 16022  
SOLVENT CDCl3  
NS 8  
DS 2  
SWH 8012.820 Hz  
FIDRES 0.500114 Hz  
AQ 0.9997728 sec  
RG 4.5  
DW 62.400 usec  
DE 6.00 usec  
TE 298.0 K  
D1 0.10000000 sec  
MCREST 0 sec  
MCWRK 0.01500000 sec

==== CHANNEL f1 =====  
NUC1 1H  
P1 9.75 usec  
PL1 1.60 dB  
SFO1 500.2235015 MHz

F2 - Processing parameters  
SI 65536  
SF 500.2200312 MHz  
WDW EM  
SSB 0  
LB 0.30 Hz  
GB 0  
PC 1.00

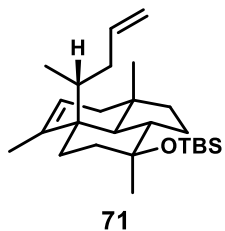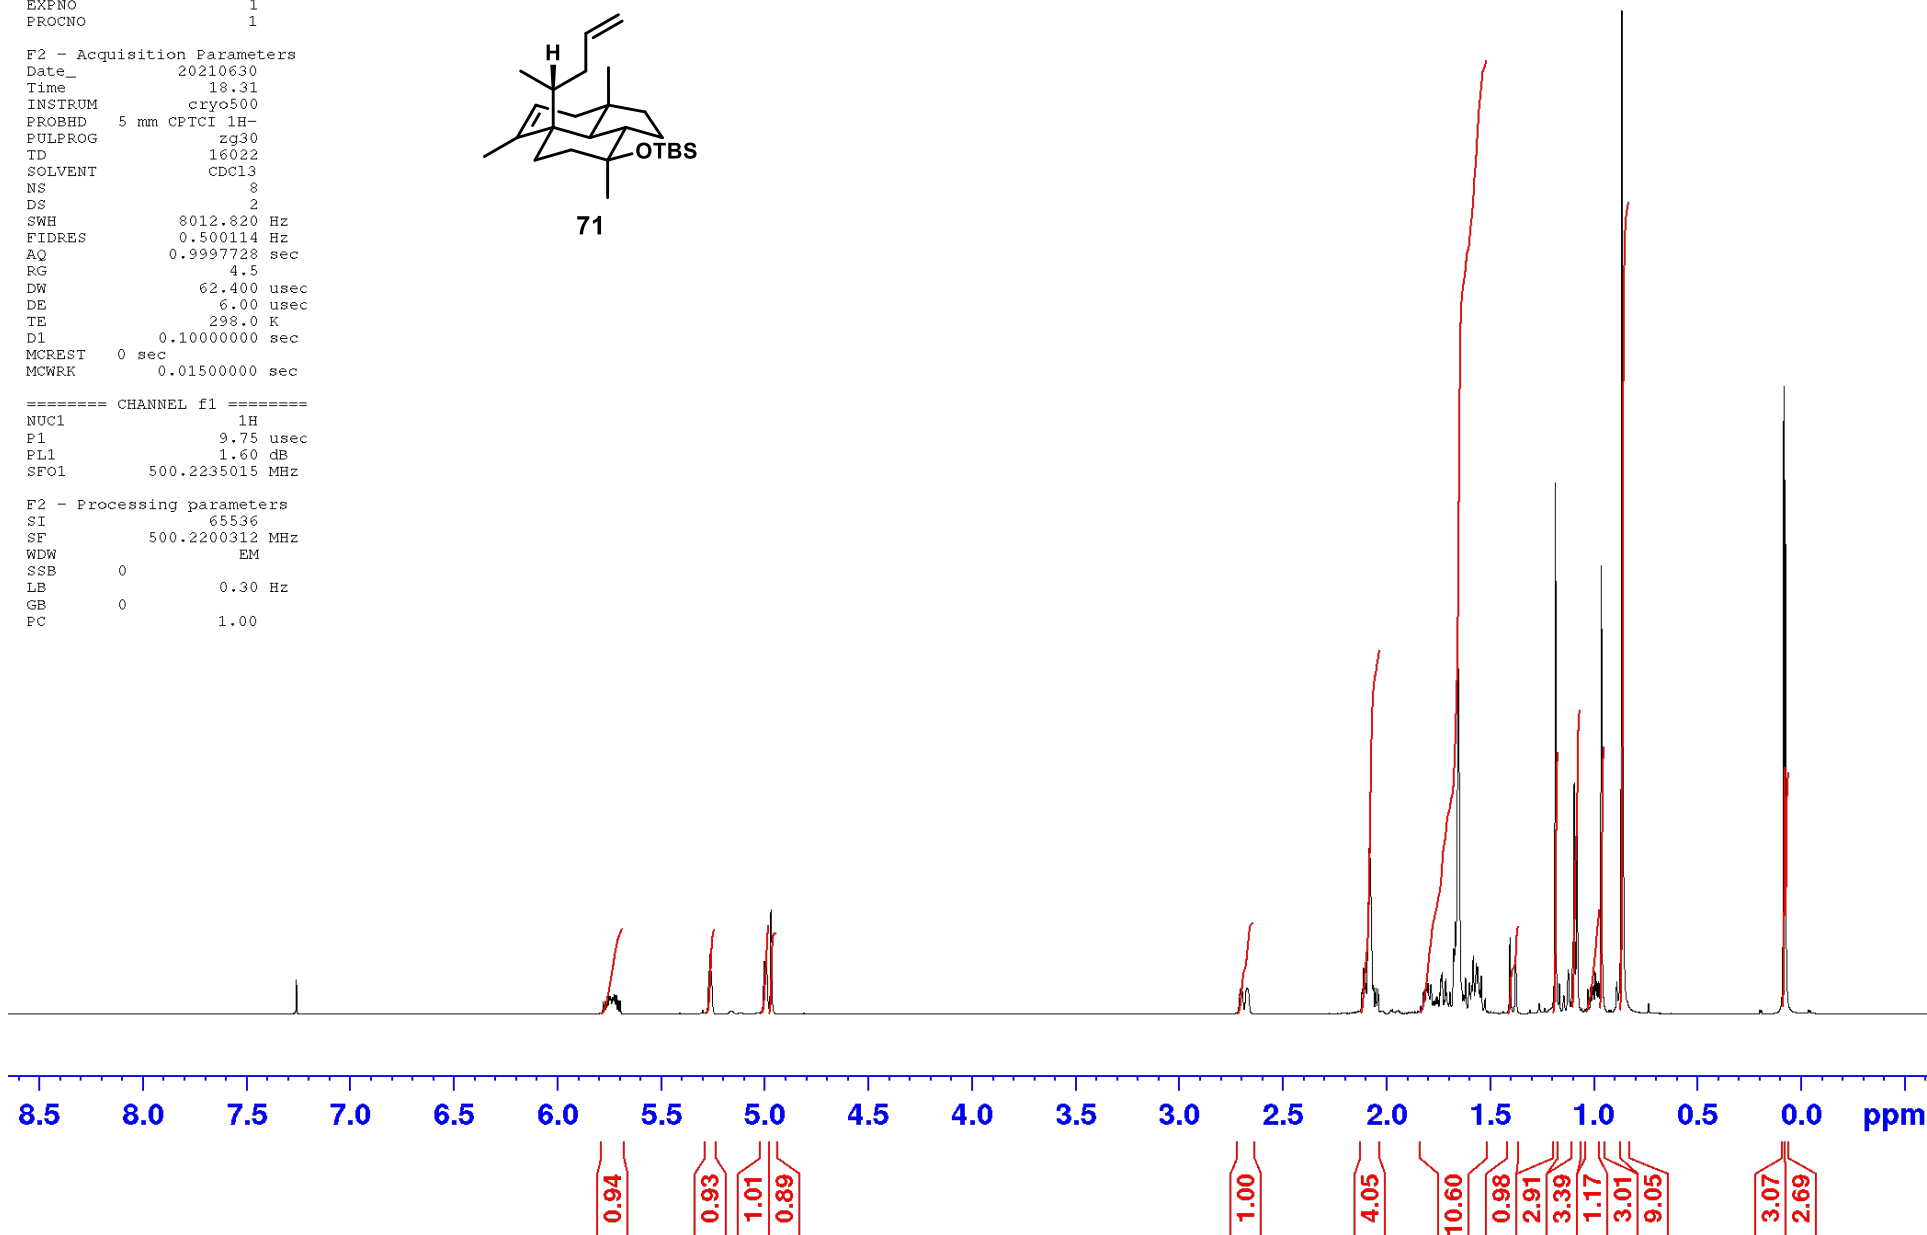

Current Data Parameters  
NAME Jc 5-069 superH  
EXPNO 2  
PROCNO 1

F2 - Acquisition Parameters  
Date\_ 20210630  
Time 18.32  
INSTRUM cryo500  
PROBHD 5 mm CPTCI 1H-  
PULPROG SpinEchopg30gp2.prd  
TD 65536  
SOLVENT CDCl3  
NS 11  
DS 16  
SWH 30303.031 Hz  
FIDRES 0.462388 Hz  
AQ 1.0813440 sec  
RG 5792.6  
DW 16.500 usec  
DE 6.00 usec  
TE 298.0 K  
D1 0.25000000 sec  
d11 0.03000000 sec  
D16 0.00020000 sec  
d17 0.00019600 sec  
MCREST 0 sec  
MCWPK 0.01500000 sec  
P2 37.70 usec

----- CHANNEL f1 -----  
NUC1 13C  
P1 18.85 usec  
P12 2000.00 usec  
P20 500.00 usec  
PL0 120.00 dB  
PL1 -1.00 dB  
SF01 125.7942548 MHz  
SP2 1.55 dB  
SP4 1.55 dB  
SPNAM[2] Crp60comp.4  
SPNAM[4] Crp60,0.5,20.1  
SPOFF2 0 Hz  
SPOFF4 0 Hz

----- CHANNEL f2 -----  
CPDPRG[2] waltz16  
NUC2 1H  
PCPD2 100.00 usec  
P12 1.60 dB  
PL12 22.00 dB  
SF02 500.2225011 MHz

----- GRADIENT CHANNEL -----  
GPNAM[1] SINE.100  
GPNAM[2] SINE.100  
GPX1 0 %  
GPX2 0 %  
GPY1 0 %  
GPY2 0 %  
GPZ1 30.00 %  
GPZ2 50.00 %  
p15 500.00 usec  
p16 1000.00 usec

F2 - Processing parameters  
SI 65536  
SF 125.7804050 MHz  
WDW EM  
SSB 0  
LB 1.00 Hz  
GB 0  
PC 2.00

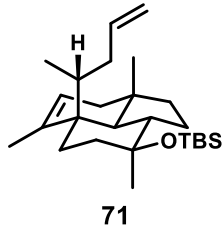

140.991  
139.828

123.796

115.347

77.006

57.757  
45.225  
44.567  
42.900  
41.472  
41.404  
41.284  
37.689  
34.246  
30.237  
25.991  
22.737  
22.018  
20.994  
20.824  
18.245  
18.105  
1.675  
-1.719

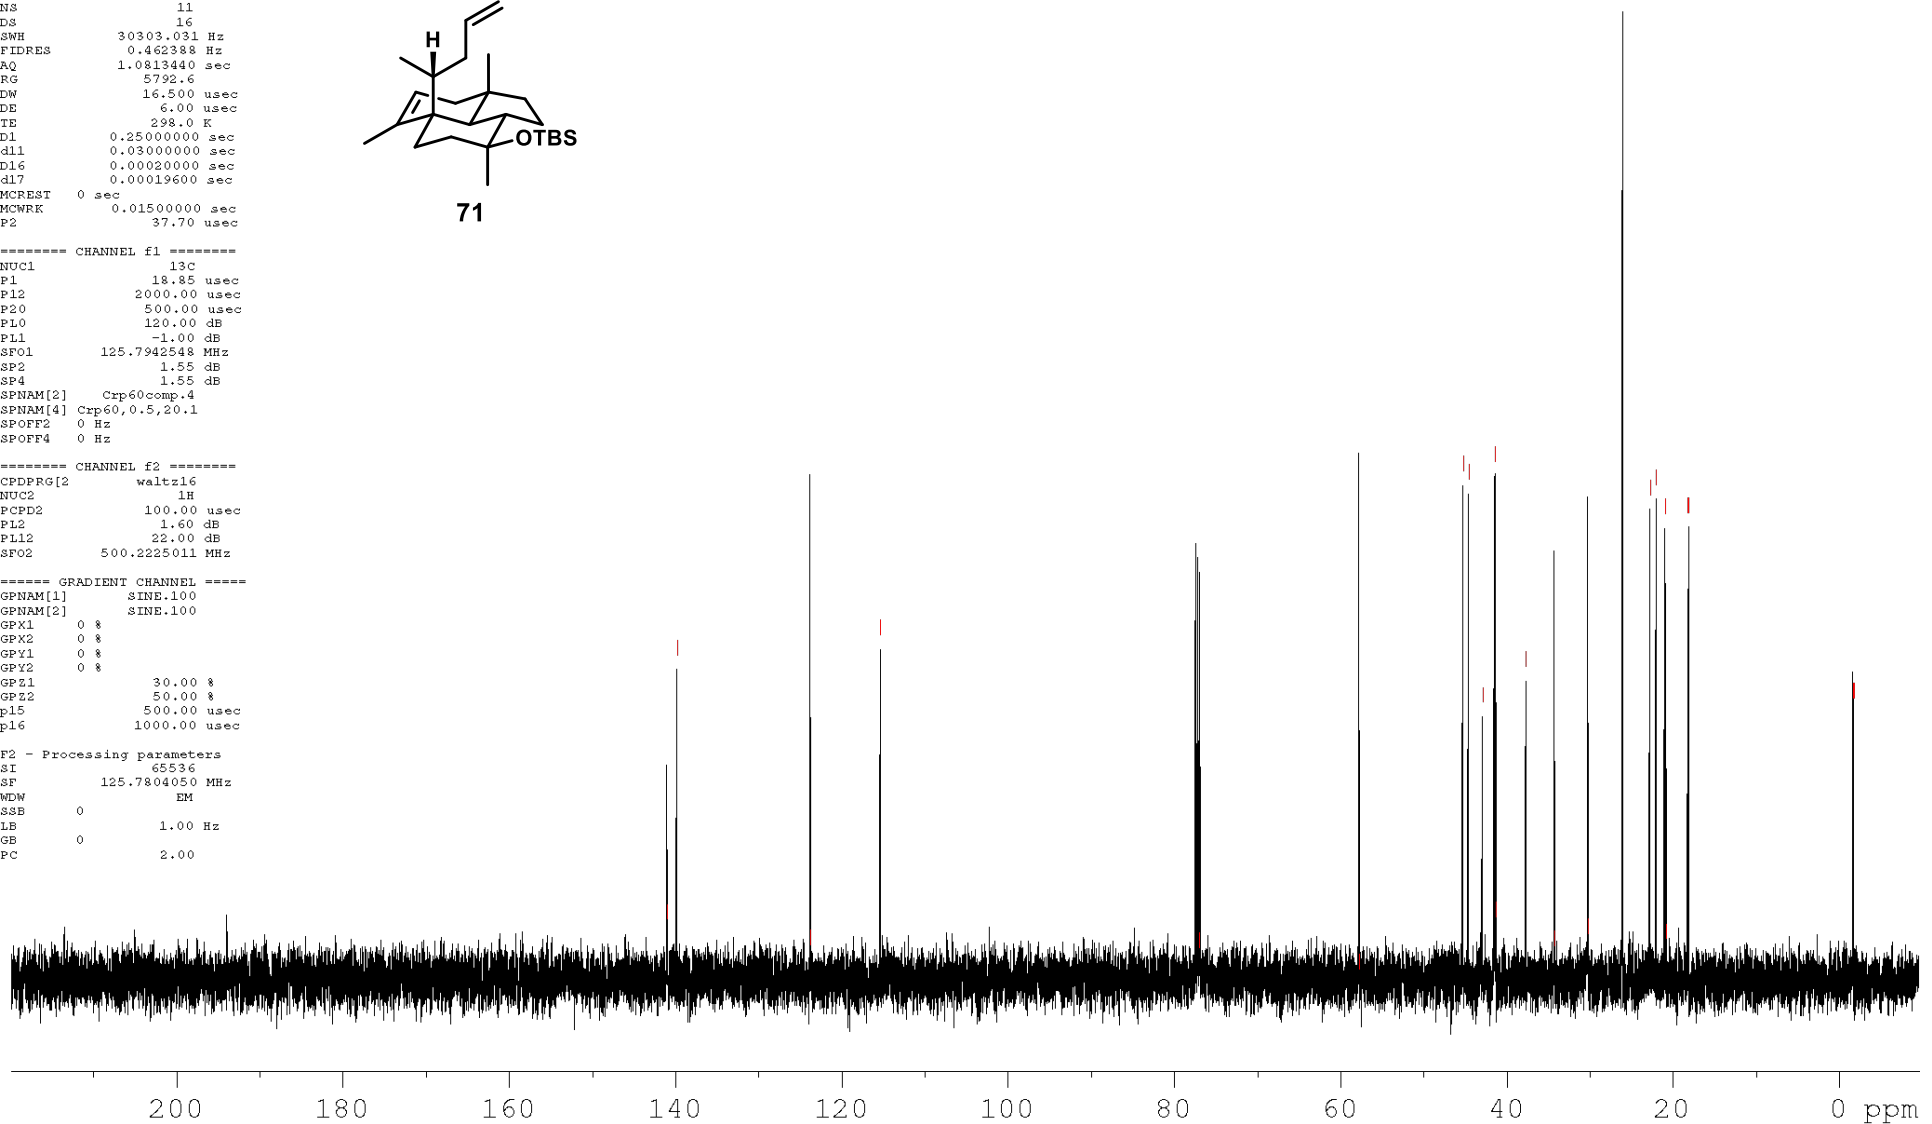

Current Data Parameters  
NAME JC 5-054 diol  
EXPNO 1  
PROCNO 1

F2 - Acquisition Parameters  
Date\_ 20210708  
Time 19.05  
INSTRUM cryo500  
PROBHD 5 mm CPTCI 1H-  
PULPROG zg30  
TD 16022  
SOLVENT CDCl3  
NS 8  
DS 2  
SWH 8012.820 Hz  
FIDRES 0.500114 Hz  
AQ 0.9997728 sec  
RG 8  
DW 62.400 usec  
DE 6.00 usec  
TE 298.0 K  
D1 0.10000000 sec  
MCREST 0 sec  
MCWRK 0.01500000 sec

==== CHANNEL f1 =====  
NUC1 1H  
P1 9.75 usec  
PL1 1.60 dB  
SFO1 500.2235015 MHz

F2 - Processing parameters  
SI 65536  
SF 500.2200312 MHz  
WDW EM  
SSB 0  
LB 0.30 Hz  
GB 0  
PC 2.00

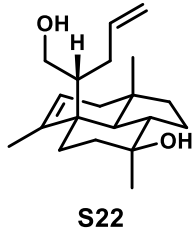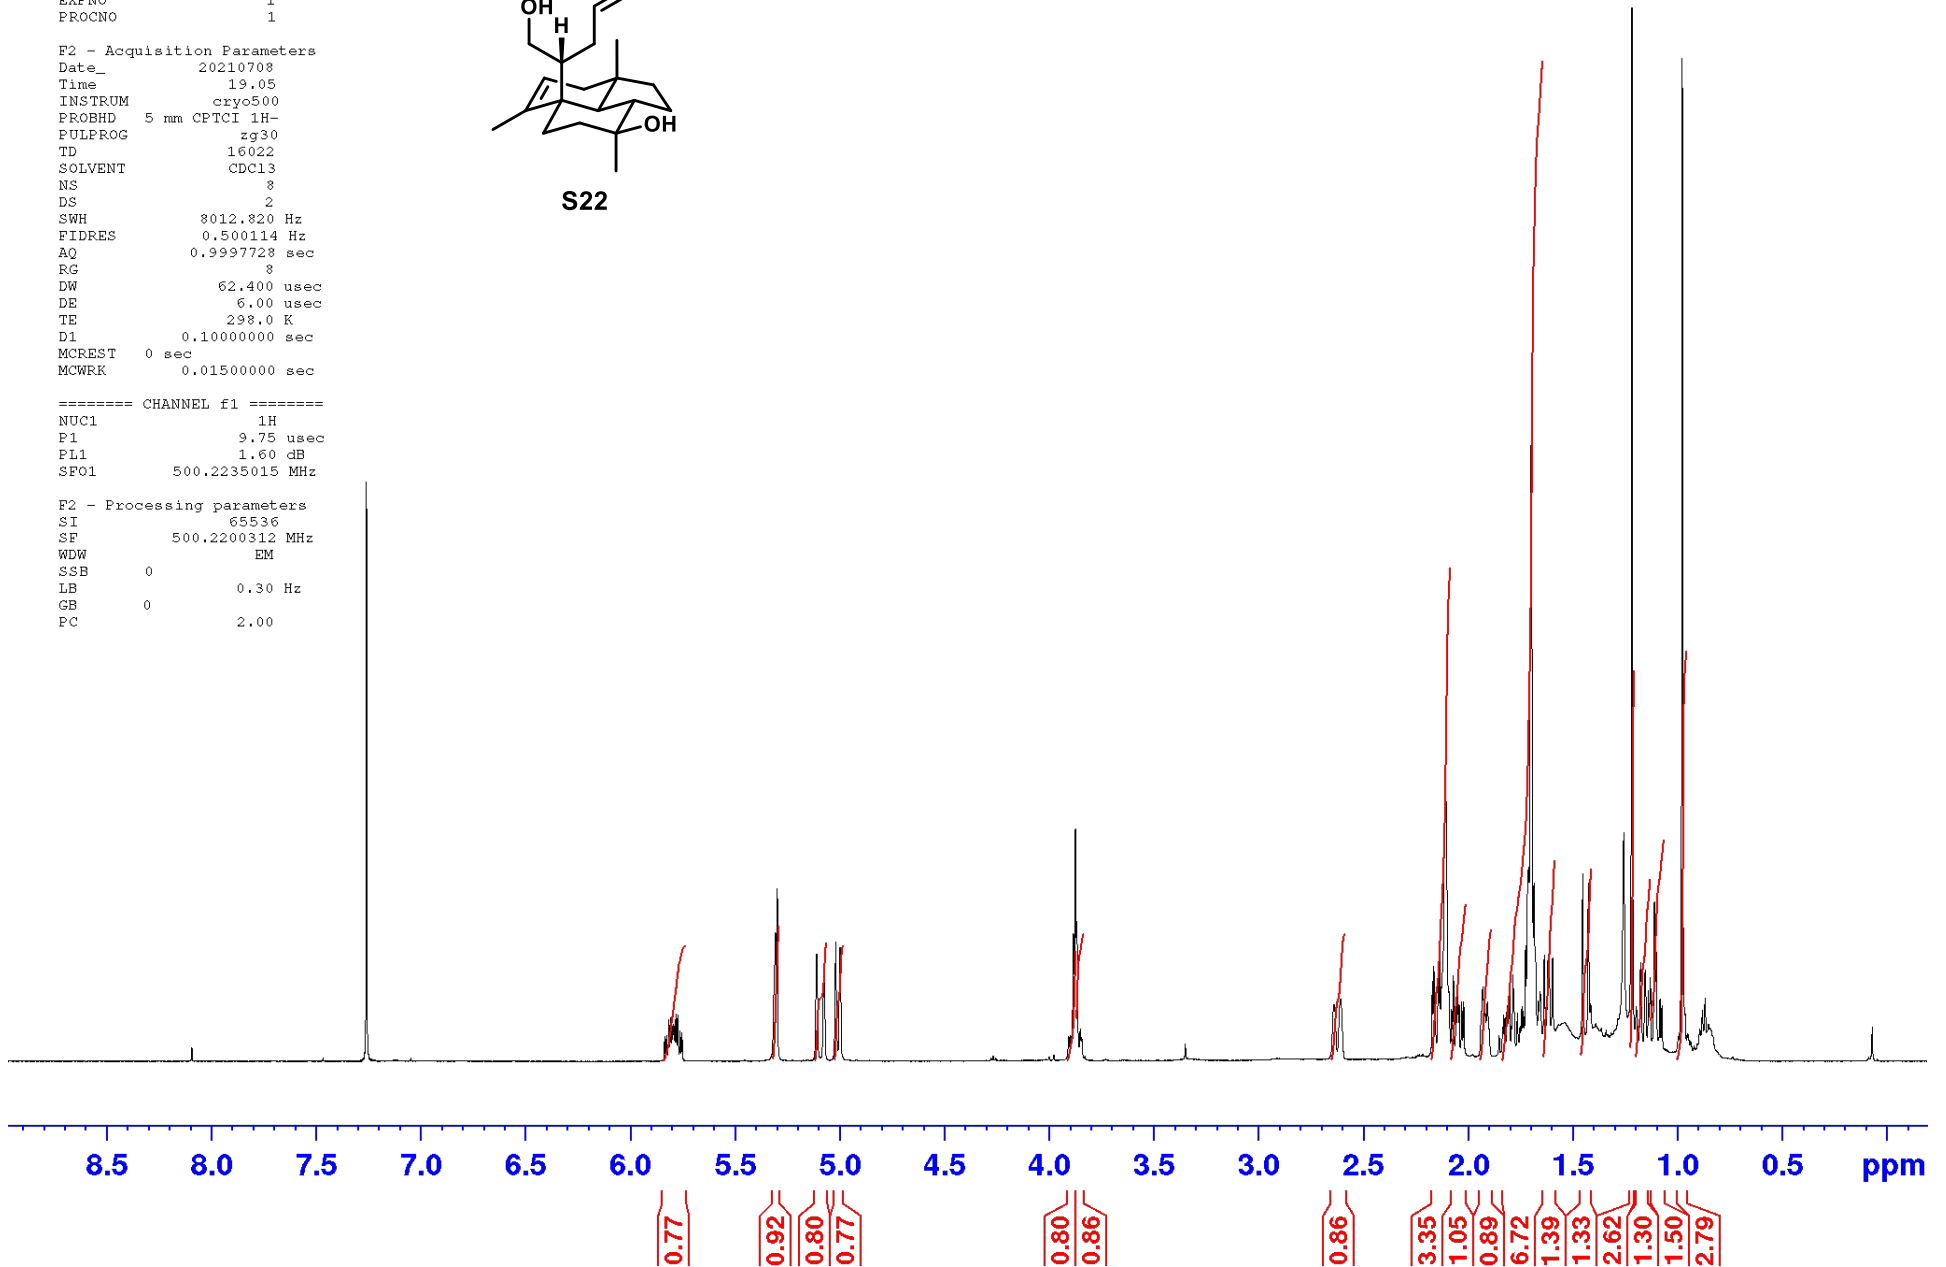

Current Data Parameters  
NAME JC 5-054 diol  
EXPNO 2  
PROCNO 1

F2 - Acquisition Parameters  
Date\_ 20210708  
Time 19.08  
INSTRUM cryo500  
PROBHD 5 mm CPCT 1H-  
PULPROG SpinEchopg30pp2.prd  
TD 65536  
SOLVENT CDCl3  
NS 156  
DS 16  
SWH 30303.031 Hz  
FIDRES 0.462388 Hz  
AQ 1.0813440 sec  
RG 5160.6  
DW 16.500 usec  
DE 6.00 usec  
TE 298.0 K  
d1 1.00000000 sec  
d11 0.03000000 sec  
d16 0.00020000 sec  
d17 0.00019600 sec  
MCOREST 0 sec  
MCORR 0.01500000 sec  
F2 37.70 usec

===== CHANNEL f1 =====  
NUC1 13C  
P1 18.85 usec  
P2 2000.00 usec  
P3 500.00 usec  
PL0 120.00 dB  
PL1 -1.00 dB  
SFO1 125.7942548 MHz  
SF2 1.55 dB  
SF4 1.55 dB  
SPNAM[2] Crp60comp.4  
SPNAM[4] Crp60,0.5,20.1  
SPOFF2 0 Hz  
SPOFF4 0 Hz

===== CHANNEL f2 =====  
CPDPRG2 waltz16  
NUC2 1H  
PCPD2 100.00 usec  
PL2 1.60 dB  
PL12 22.00 dB  
SFO2 500.2225011 MHz

===== GRADIENT CHANNEL =====  
GPNAM[1] SINE.100  
GPNAM[2] SINE.100  
GPK1 0 %  
GPK2 0 %  
GPY1 0 %  
GPY2 0 %  
GPE1 30.00 %  
GPE2 50.00 %  
p15 500.00 usec  
p16 1000.00 usec

F2 - Processing parameters  
SI 65536  
SF 125.7804060 MHz  
WDW EM  
SSB 0  
LB 1.00 Hz  
GB 0  
PC 2.00

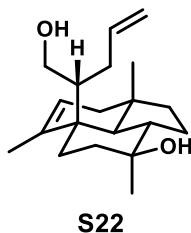

140.57  
140.08  
124.51  
115.80  
74.53  
63.86  
58.44  
45.06  
44.07  
43.10  
41.53  
41.24  
38.03  
37.78  
35.94  
33.94  
22.19  
21.77  
20.53  
20.34

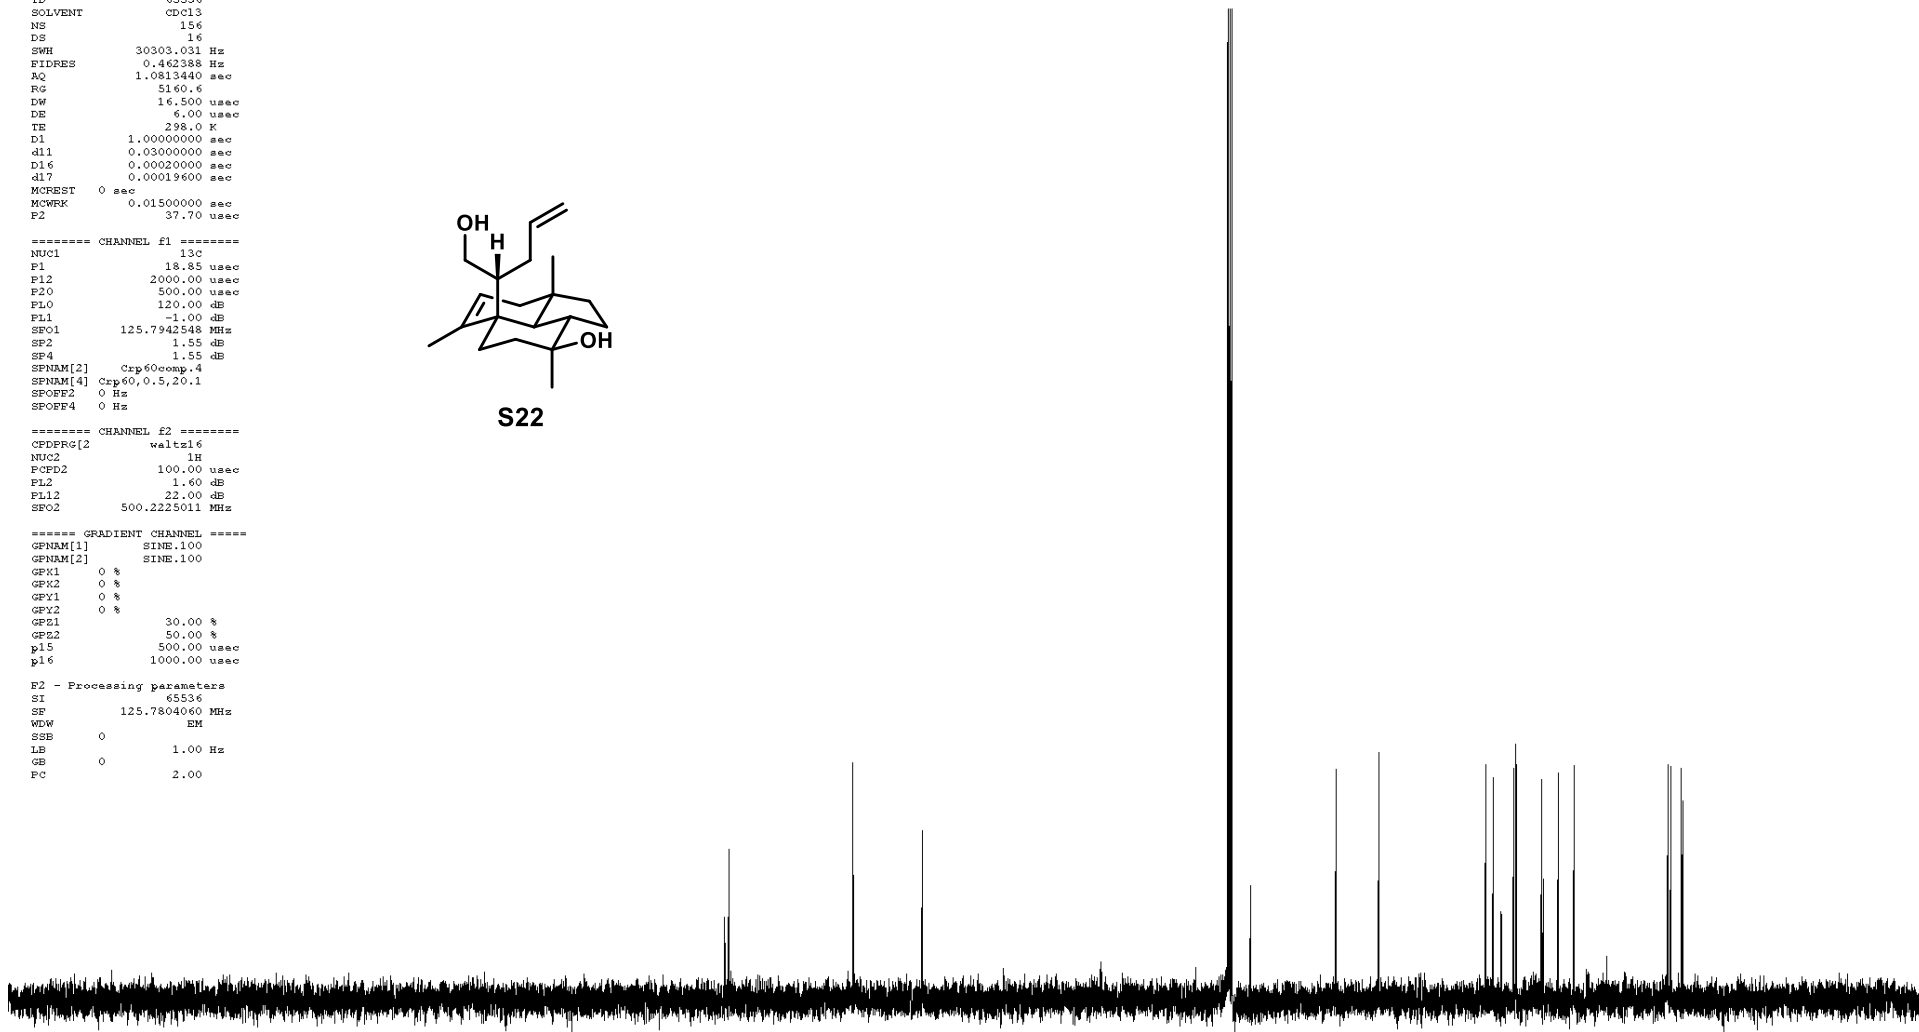

220 210 200 190 180 170 160 150 140 130 120 110 100 90 80 70 60 50 40 30 20 10 ppm

Current Data Parameters  
NAME JSCIV-292-f4-13  
EXPNO 1  
PROCNO 1

F2 - Acquisition Parameters

Date\_ 20211208  
Time\_ 17.16  
INSTRUM av600  
PROBHD 5 mm CPBBO BB-  
PULPROG zg30  
TD 48074  
SOLVENT CDC13  
NS 8  
DS 2  
SWH 7796.258 Hz  
FIDRES 0.162172 Hz  
AQ 3.0831459 sec  
RG 8  
DW 64.133 usec  
DE 10.57 usec  
TE 298.0 K  
D1 4.00000000 sec  
TD0 1

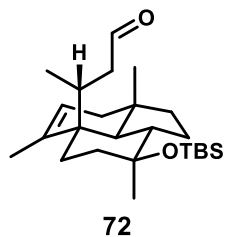

==== CHANNEL f1 =====  
SFO1 600.1336008 MHz  
NUC1 1H  
P1 9.50 usec  
PLW1 30.00000000 W

F2 Processing parameters

SI 65536  
SF 600.1300348 MHz  
WDW EM  
SSB 0  
LB 0.30 Hz  
GB 0  
PC 1.00

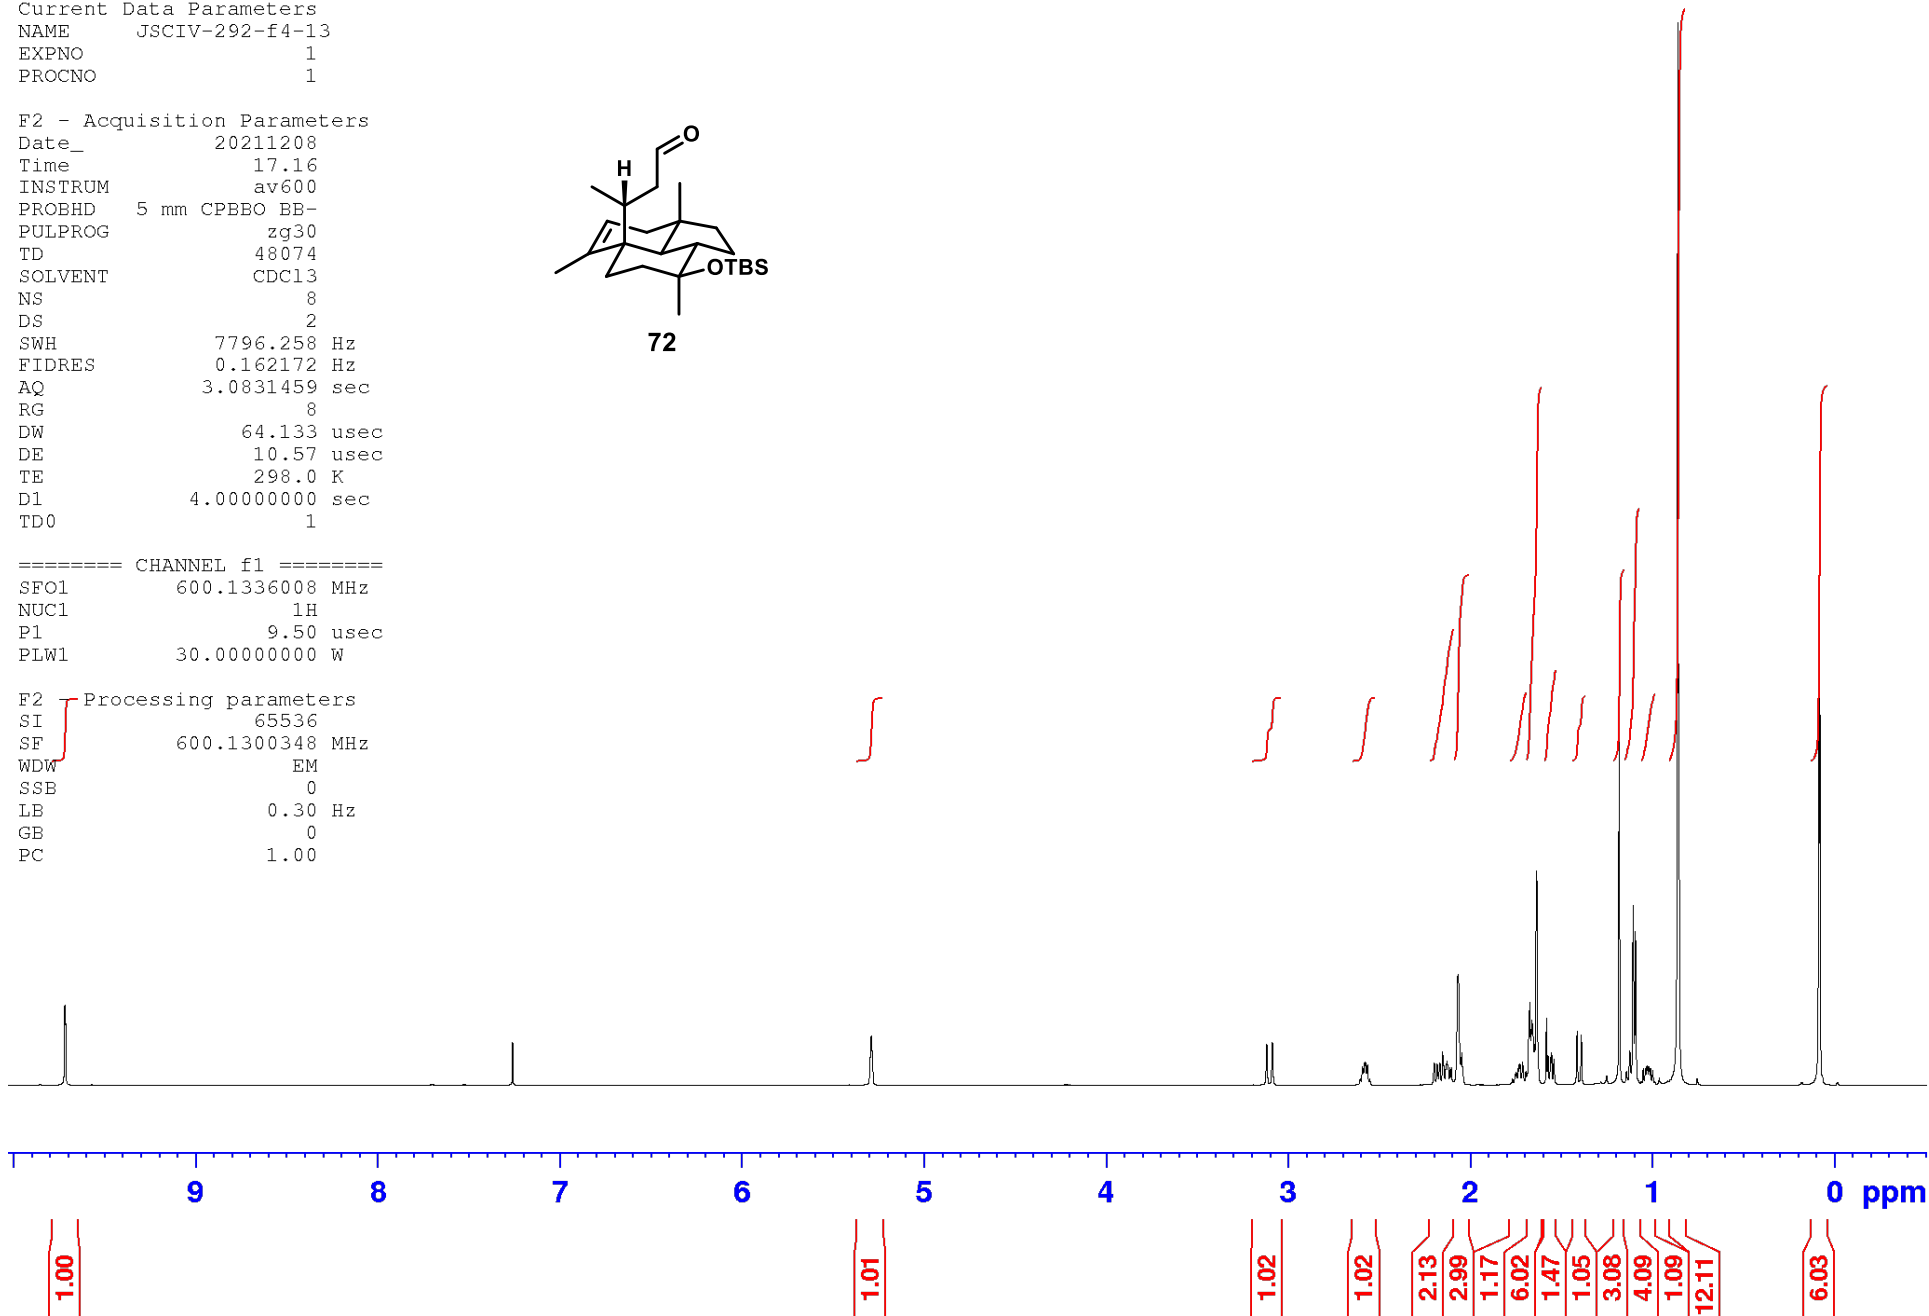



Current Data Parameters  
NAME JSCIV-292-f4-13  
EXPNO 2  
PROCNO 1

F2 - Acquisition Parameters

Date\_ 20211208  
Time 17.19  
INSTRUM av600  
PROBHD 5 mm CPBBO BB-  
PULPROG zgdc30  
TD 65536  
SOLVENT CDC13  
NS 119  
DS 4  
SWH 36231.883 Hz  
FIDRES 0.552855 Hz  
AQ 0.9043968 sec  
RG 2050  
DW 13.800 usec  
DE 19.63 usec  
TE 297.9 K  
D1 0.40000001 sec  
D11 0.03000000 sec  
TDO 1

===== CHANNEL f1 =====  
SFO1 150.9194080 MHz  
NUC1 13C  
P1 10.10 usec  
PLW1 64.00000000 W

===== CHANNEL f2 =====  
SFO2 600.1330010 MHz  
NUC2 1H  
CPDPRG[2] waltz16  
PCPD2 80.00 usec  
PLW2 30.00000000 W  
PLW12 0.37154001 W

F2 - Processing parameters

SI 65536  
SF 150.9027941 MHz  
WDW EM  
SSB 0  
LB 1.00 Hz  
GB 0  
PC 1.00

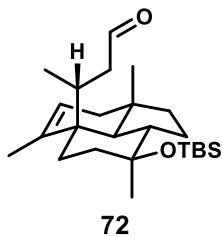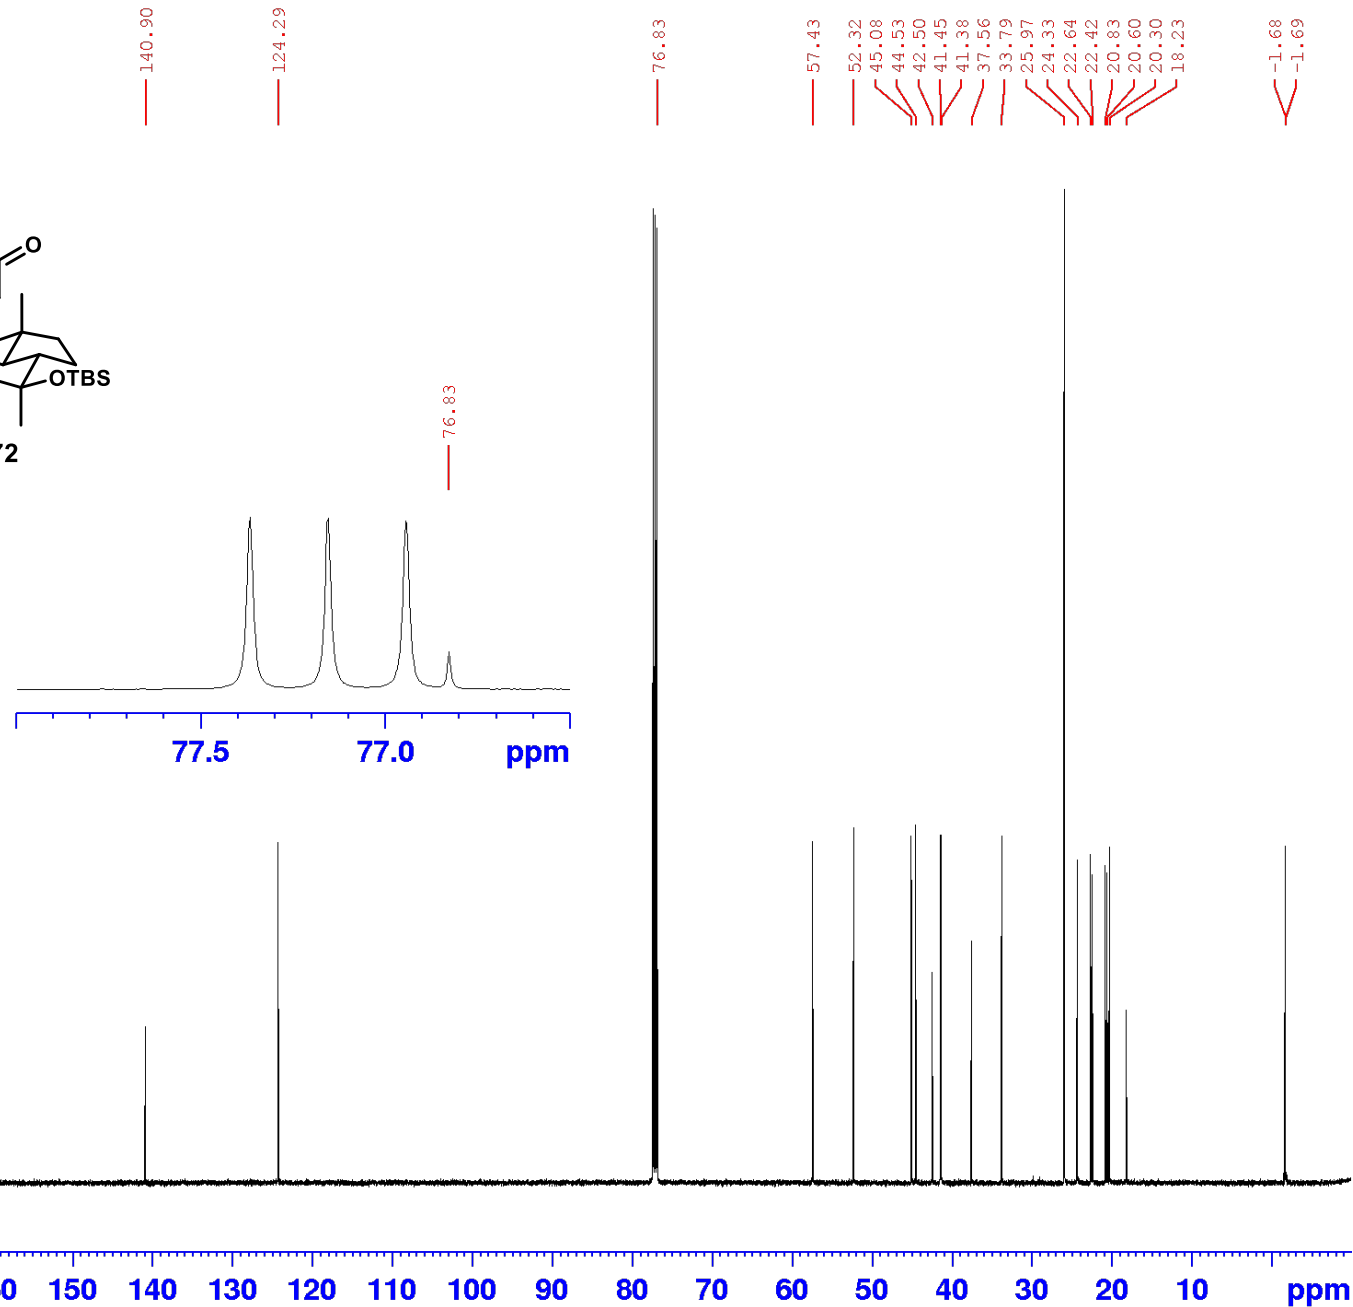

Current Data Parameters

NAME JSCV-094-f3-8  
EXPNO 1  
PROCNO 1

F2 - Acquisition Parameters

Date\_ 20220304  
Time 13.58  
INSTRUM gn500  
PROBHD 5 mm broadband  
PULPROG zg30  
TD 40062  
SOLVENT CDCl3  
NS 16  
DS 2  
SWH 7002.801 Hz  
FIDRES 0.174799 Hz  
AQ 2.8604269 sec  
RG 128  
DW 71.400 usec  
DE 6.00 usec  
TE 298.0 K  
D1 3.0000000 sec  
MCREST 0 sec  
MCWRK 0.01500000 sec

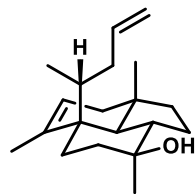

S23

==== CHANNEL f1 =====

NUC1 1H  
P1 12.00 usec  
PL1 -6.00 dB  
SFO1 498.6529919 MHz

F2 - Processing parameters

SI 65536  
SF 498.6500284 MHz  
WDW EM  
SSB 0  
LB 0.30 Hz  
GE 0  
PC 1.00

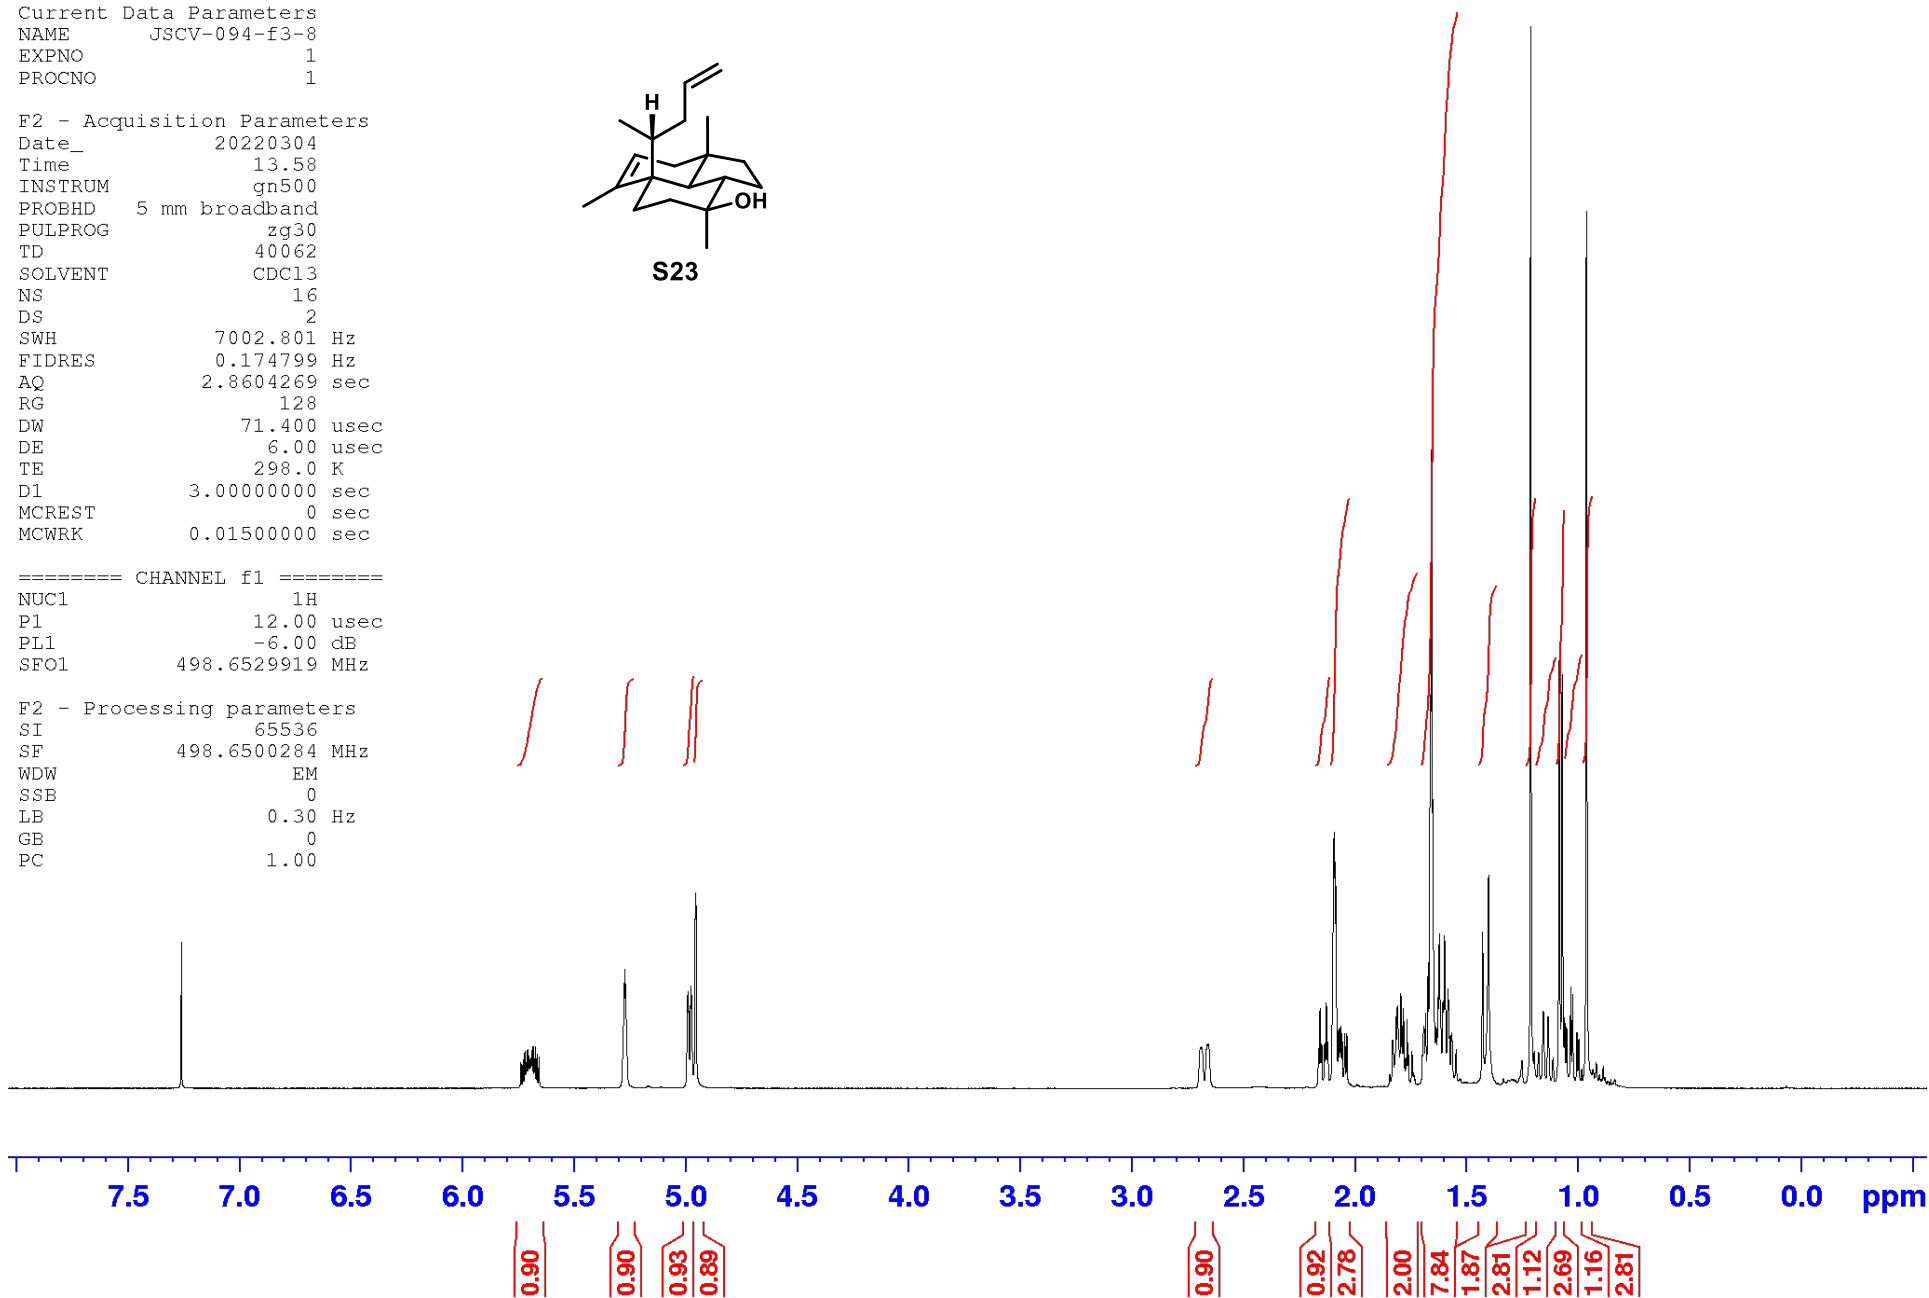

Current Data Parameters  
NAME JSCV-094-f3-8  
EXPNO 2  
PROCNO 1

F2 - Acquisition Parameters  
Date\_ 20220304  
Time 14.02  
INSTRUM gn500  
PROBHD 5 mm broadband  
PULPROG zgdc30  
TD 65536  
SOLVENT CDCl3  
NS 126  
DS 4  
SWH 30303.031 Hz  
FIDRES 0.462388 Hz  
AQ 1.0813440 sec  
RG 32768  
DW 16.500 usec  
DE 6.00 usec  
TE 297.9 K  
D1 0.25000000 sec  
d11 0.03000000 sec  
MCREST 0 sec  
MCWRK 0.01500000 sec

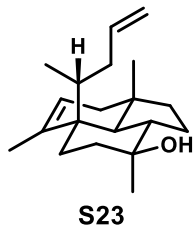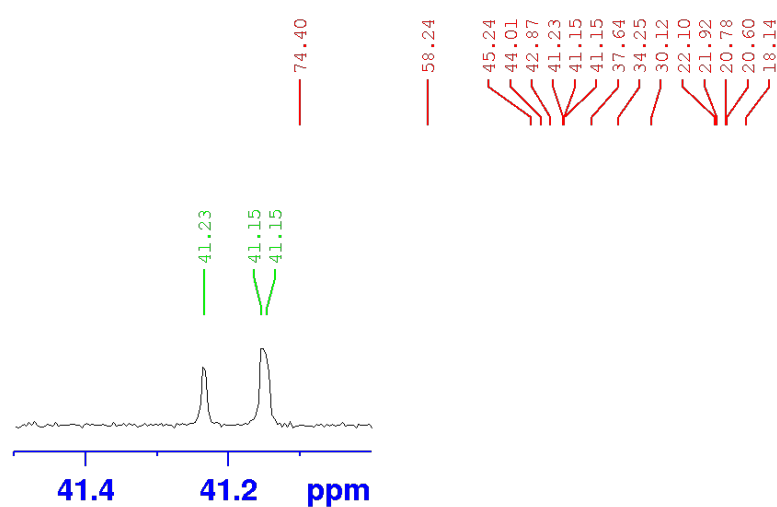

==== CHANNEL f1 =====  
NUC1 13C  
P1 14.20 usec  
PL1 -6.00 dB  
SFO1 125.3994349 MHz

==== CHANNEL f2 =====  
CPDPRG[2] waltz16  
NUC2 1H  
PCPD2 100.00 usec  
PL2 -6.00 dB  
PL12 12.30 dB  
SFO2 498.6524933 MHz

F2 - Processing parameters  
SI 65536  
SF 125.3856296 MHz  
WDW EM  
SSB 0  
LB 0 Hz  
GB 0  
PC 2.00

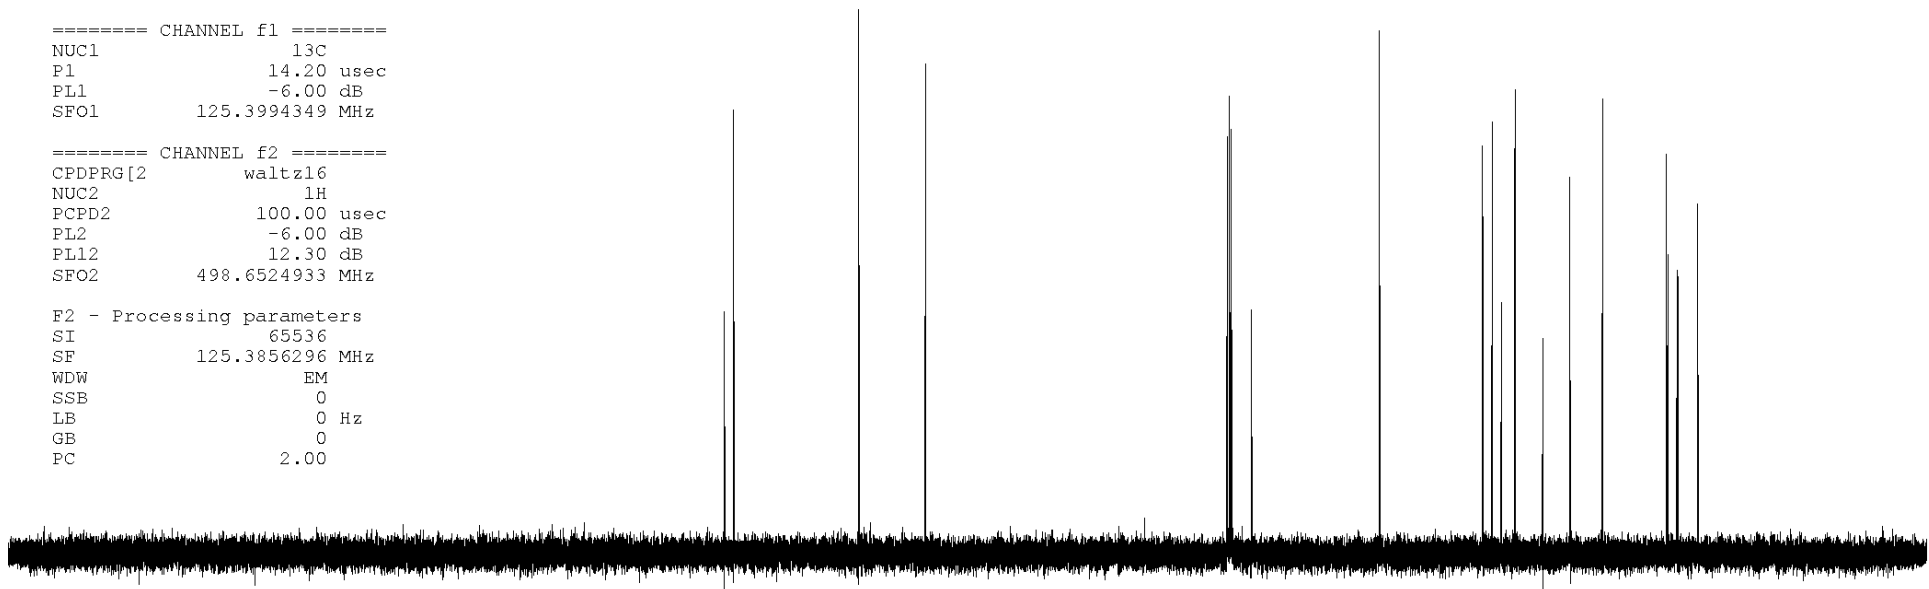

220 210 200 190 180 170 160 150 140 130 120 110 100 90 80 70 60 50 40 30 20 10 ppm

Current Data Parameters

NAME JSCV-047-f8-21  
EXPNO 1  
PROCNO 1

F2 - Acquisition Parameters

Date\_ 20220125  
Time 17.30  
INSTRUM av600  
PROBHD 5 mm CPBBO BB-  
PULPROG zg30  
TD 48074  
SOLVENT CDCl3  
NS 16  
DS 2  
SWH 9615.385 Hz  
FIDRES 0.200012 Hz  
AQ 2.4998479 sec  
RG 10  
DW 52.000 usec  
DE 14.23 usec  
TE 298.0 K  
D1 3.00000000 sec  
TD0 1

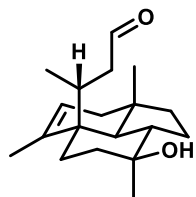

73

==== CHANNEL f1 =====

SFO1 600.1342009 MHz  
NUC1 1H  
P1 9.50 usec  
PLW1 30.00000000 W

F2 - Processing parameters

SI 65536  
SF 600.1300344 MHz  
WDW EM  
SSB 0  
LB 0.30 Hz  
GB 0  
PC 1.00

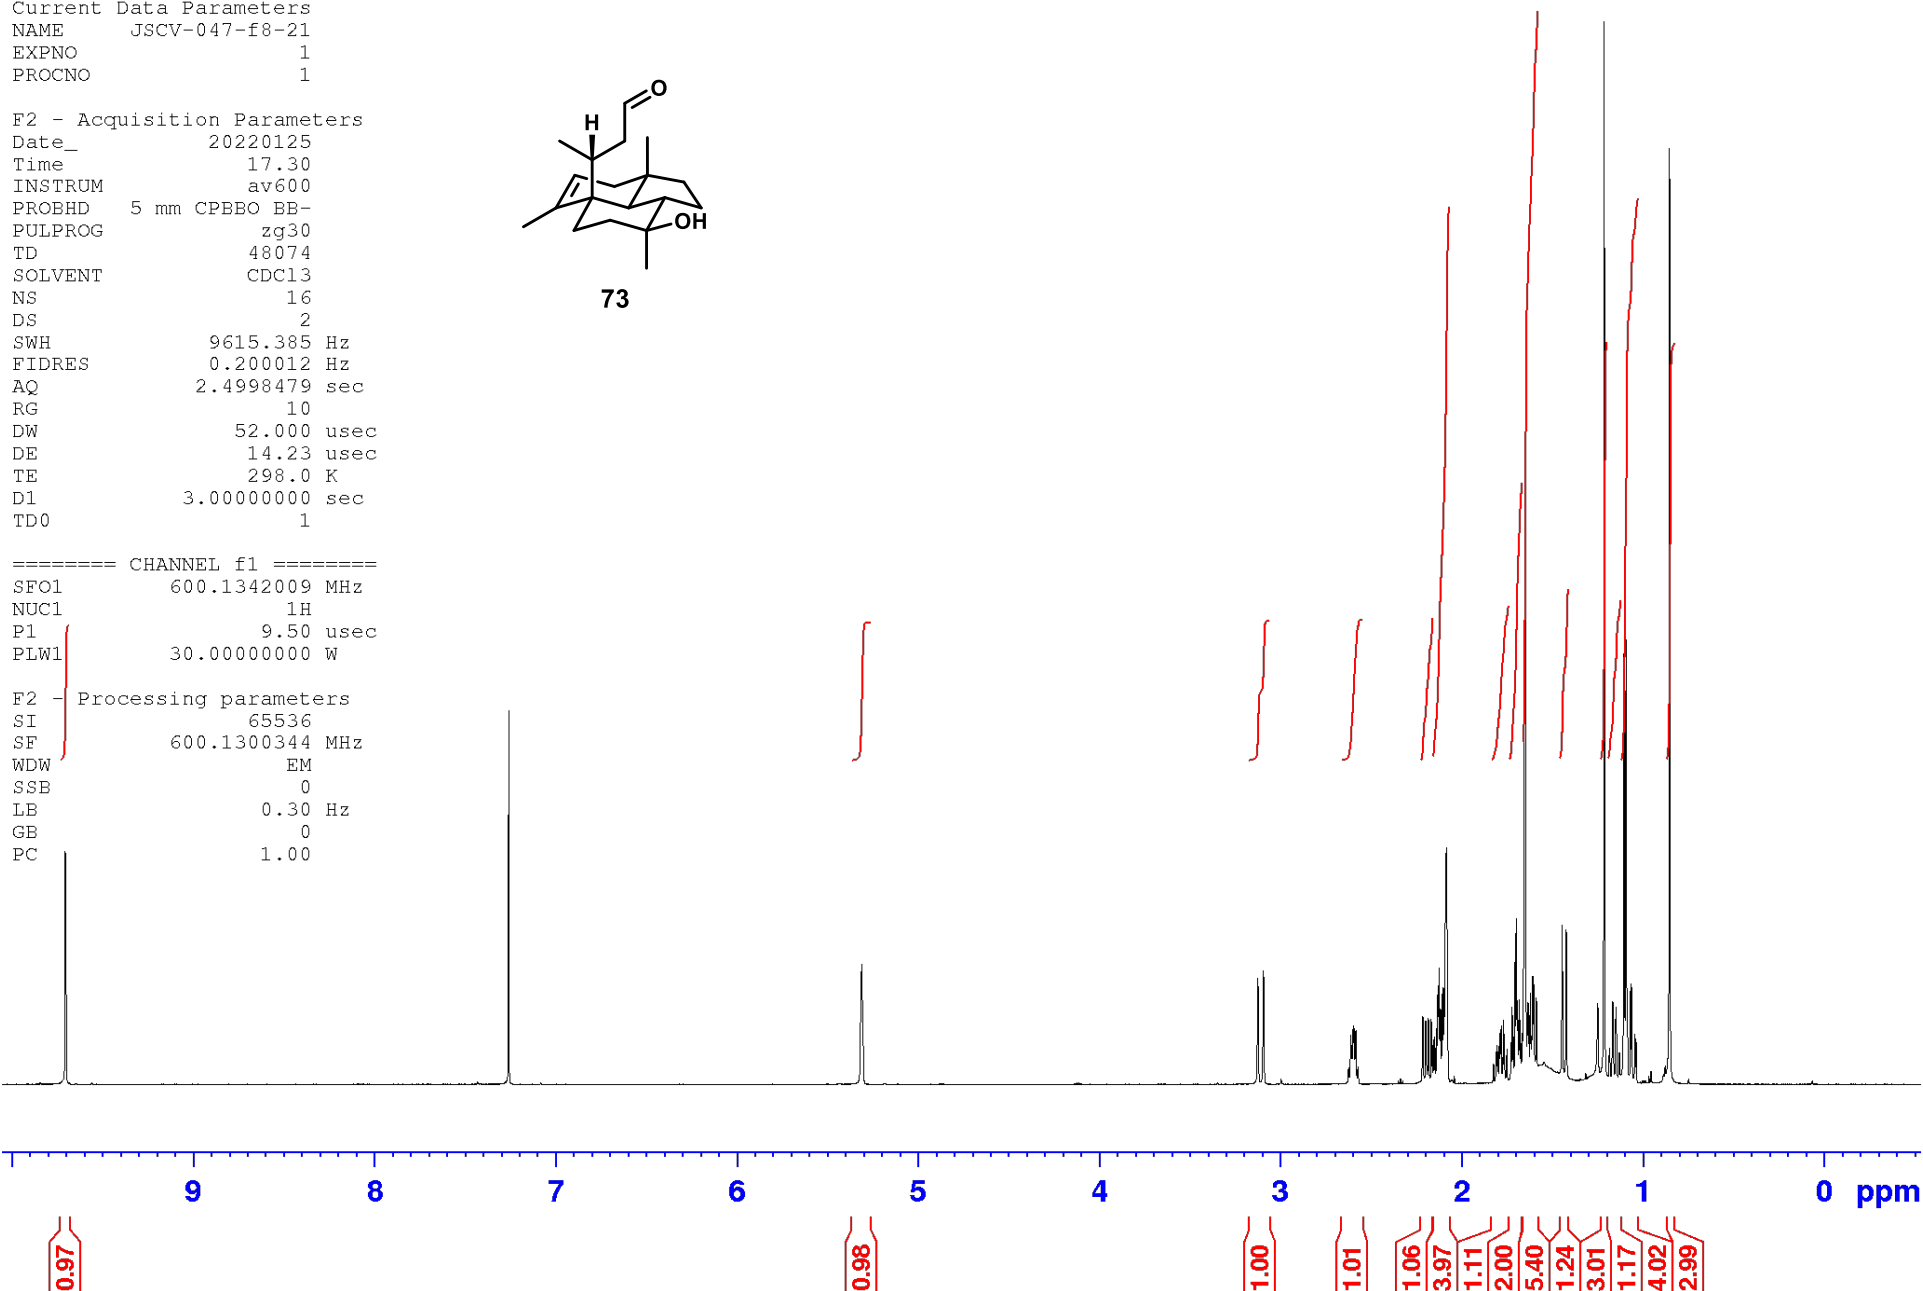

Current Data Parameters  
NAME JSCV-047-f8-21  
EXPNO 2  
PROCNO 1

F2 - Acquisition Parameters  
Date\_ 20220125  
Time 17.40  
INSTRUM av600  
PROBHD 5 mm CPBBO BB-  
PULPROG zgdc30  
TD 65536  
SOLVENT CDCl3  
NS 177  
DS 4  
SWH 36231.883 Hz  
FIDRES 0.552855 Hz  
AQ 0.9043968 sec  
RG 2050  
DW 13.800 usec  
DE 19.63 usec  
TE 297.9 K  
D1 0.4000001 sec  
D11 0.03000000 sec  
TDO 1

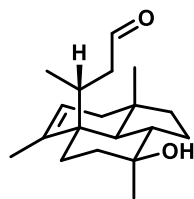

73

----- CHANNEL f1 -----  
SFO1 150.9194080 MHz  
NUC1 13C  
P1 10.10 usec  
PLW1 64.00000000 W

----- CHANNEL f2 -----  
SFO2 600.1330010 MHz  
NUC2 1H  
CPDPRG[2] waltz16  
PCPD2 80.00 usec  
PLW2 30.00000000 W  
PLW12 0.37154001 W

F2 - Processing parameters  
SI 65536  
SF 150.9027938 MHz  
WDW EM  
SSB 0  
LB 1.00 Hz  
GB 0  
PC 1.00

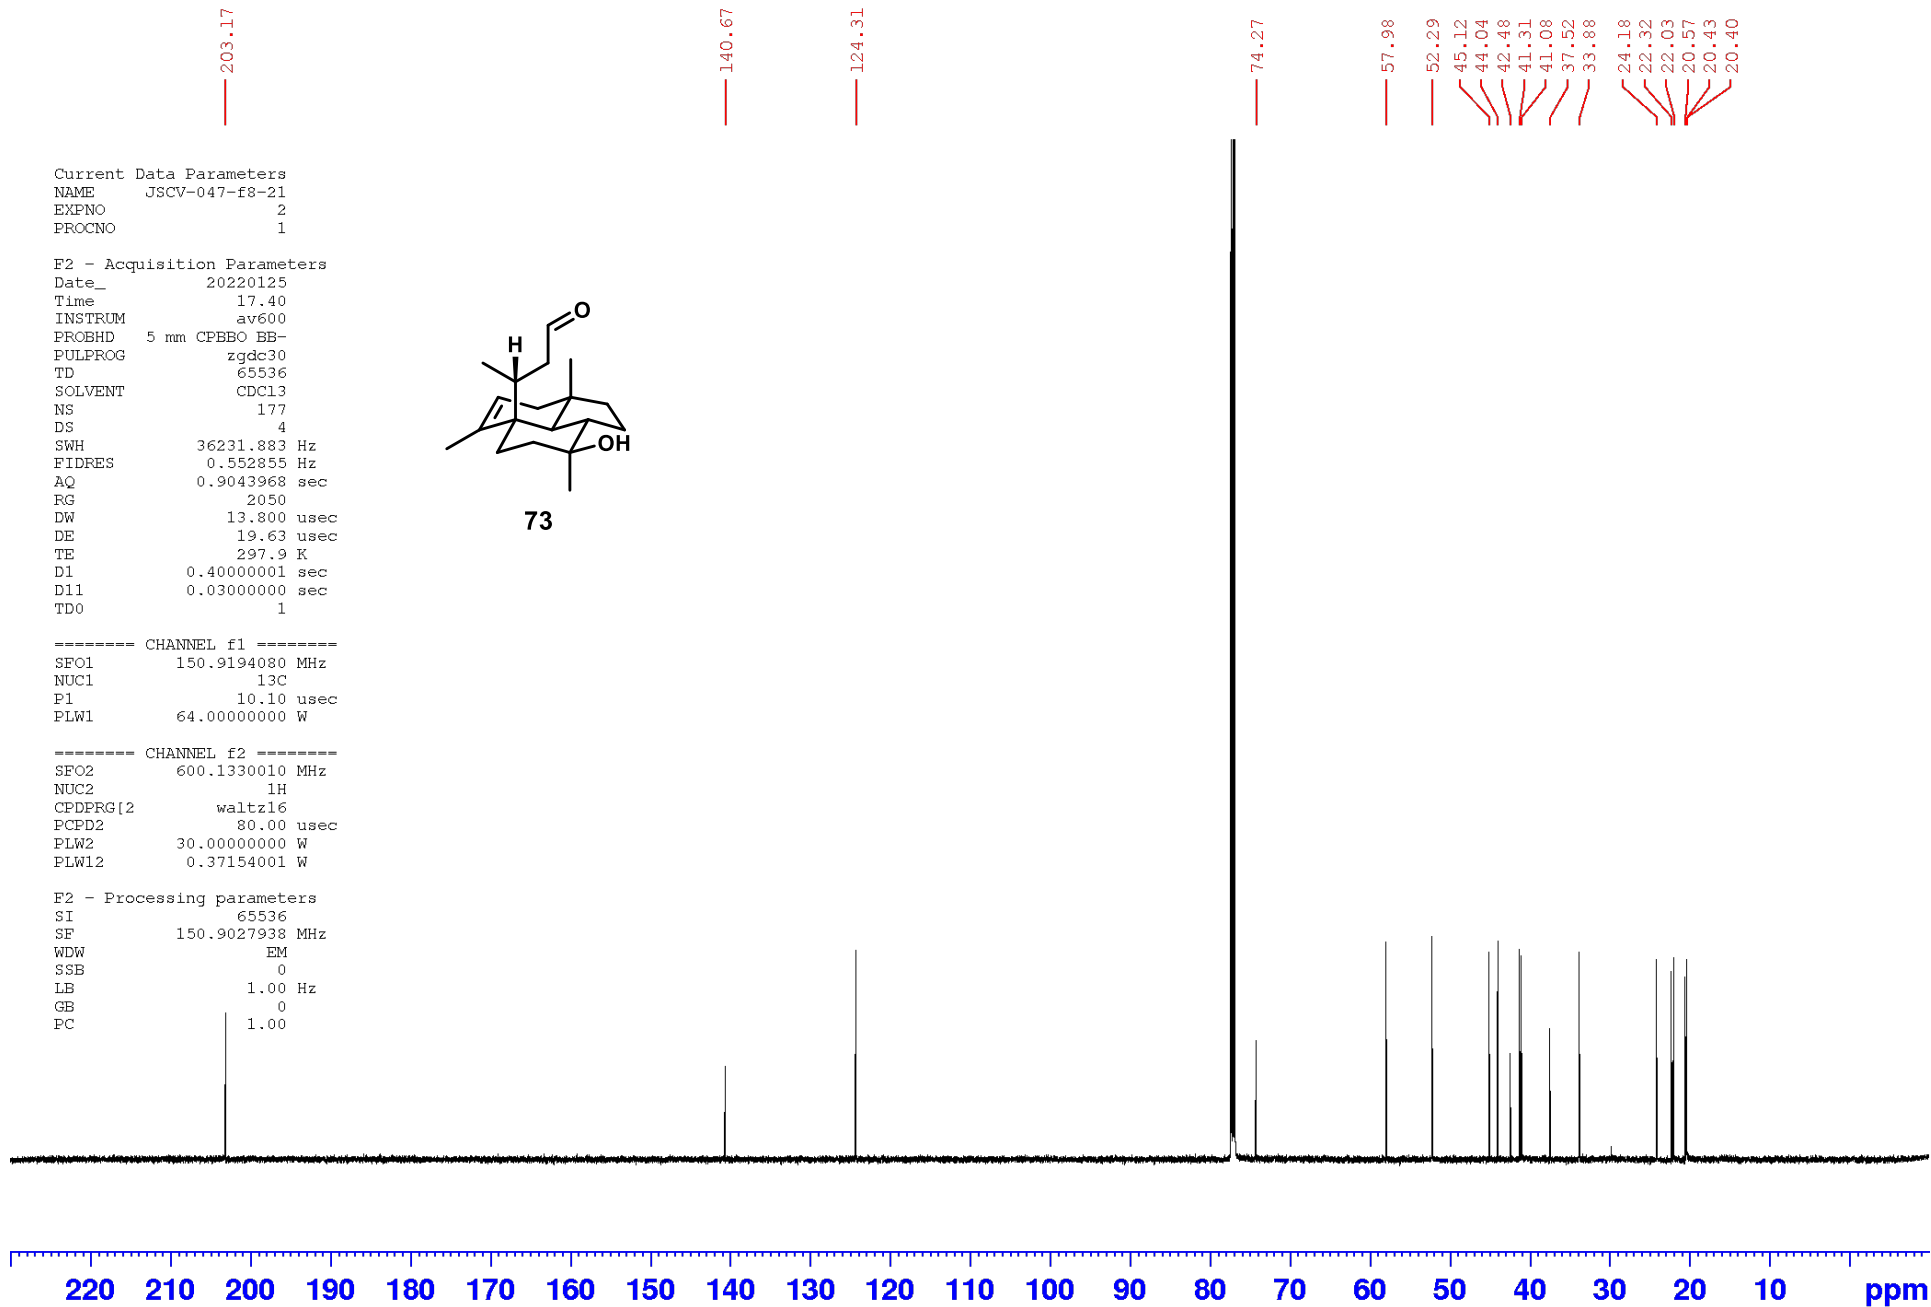

Current Data Parameters  
NAME JC 5-071 cr  
EXPNO 1  
PROCNO 1

F2 - Acquisition Parameters  
Date\_ 20210624  
Time\_ 3.27  
INSTRUM cryo500  
PROBHD 5 mm CPTCI 1H-  
PULPROG zg30  
TD 16022  
SOLVENT CDC13  
NS 8  
DS 2  
SWH 8012.820 Hz  
FIDRES 0.500114 Hz  
AQ 0.9997728 sec  
RG 8  
DW 62.400 usec  
DE 6.00 usec  
TE 298.0 K  
D1 0.10000000 sec  
MCREST 0 sec  
MCWRK 0.01500000 sec

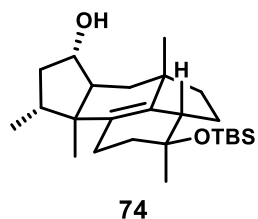

==== CHANNEL f1 =====  
NUC1 1H  
P1 9.75 usec  
PL1 1.60 dB  
SFO1 500.2235015 MHz

F2 - Processing parameters  
SI 65536  
SF 500.2200314 MHz  
WDW EM  
SSB 0  
LB 0.30 Hz  
GB 0  
PC 1.00

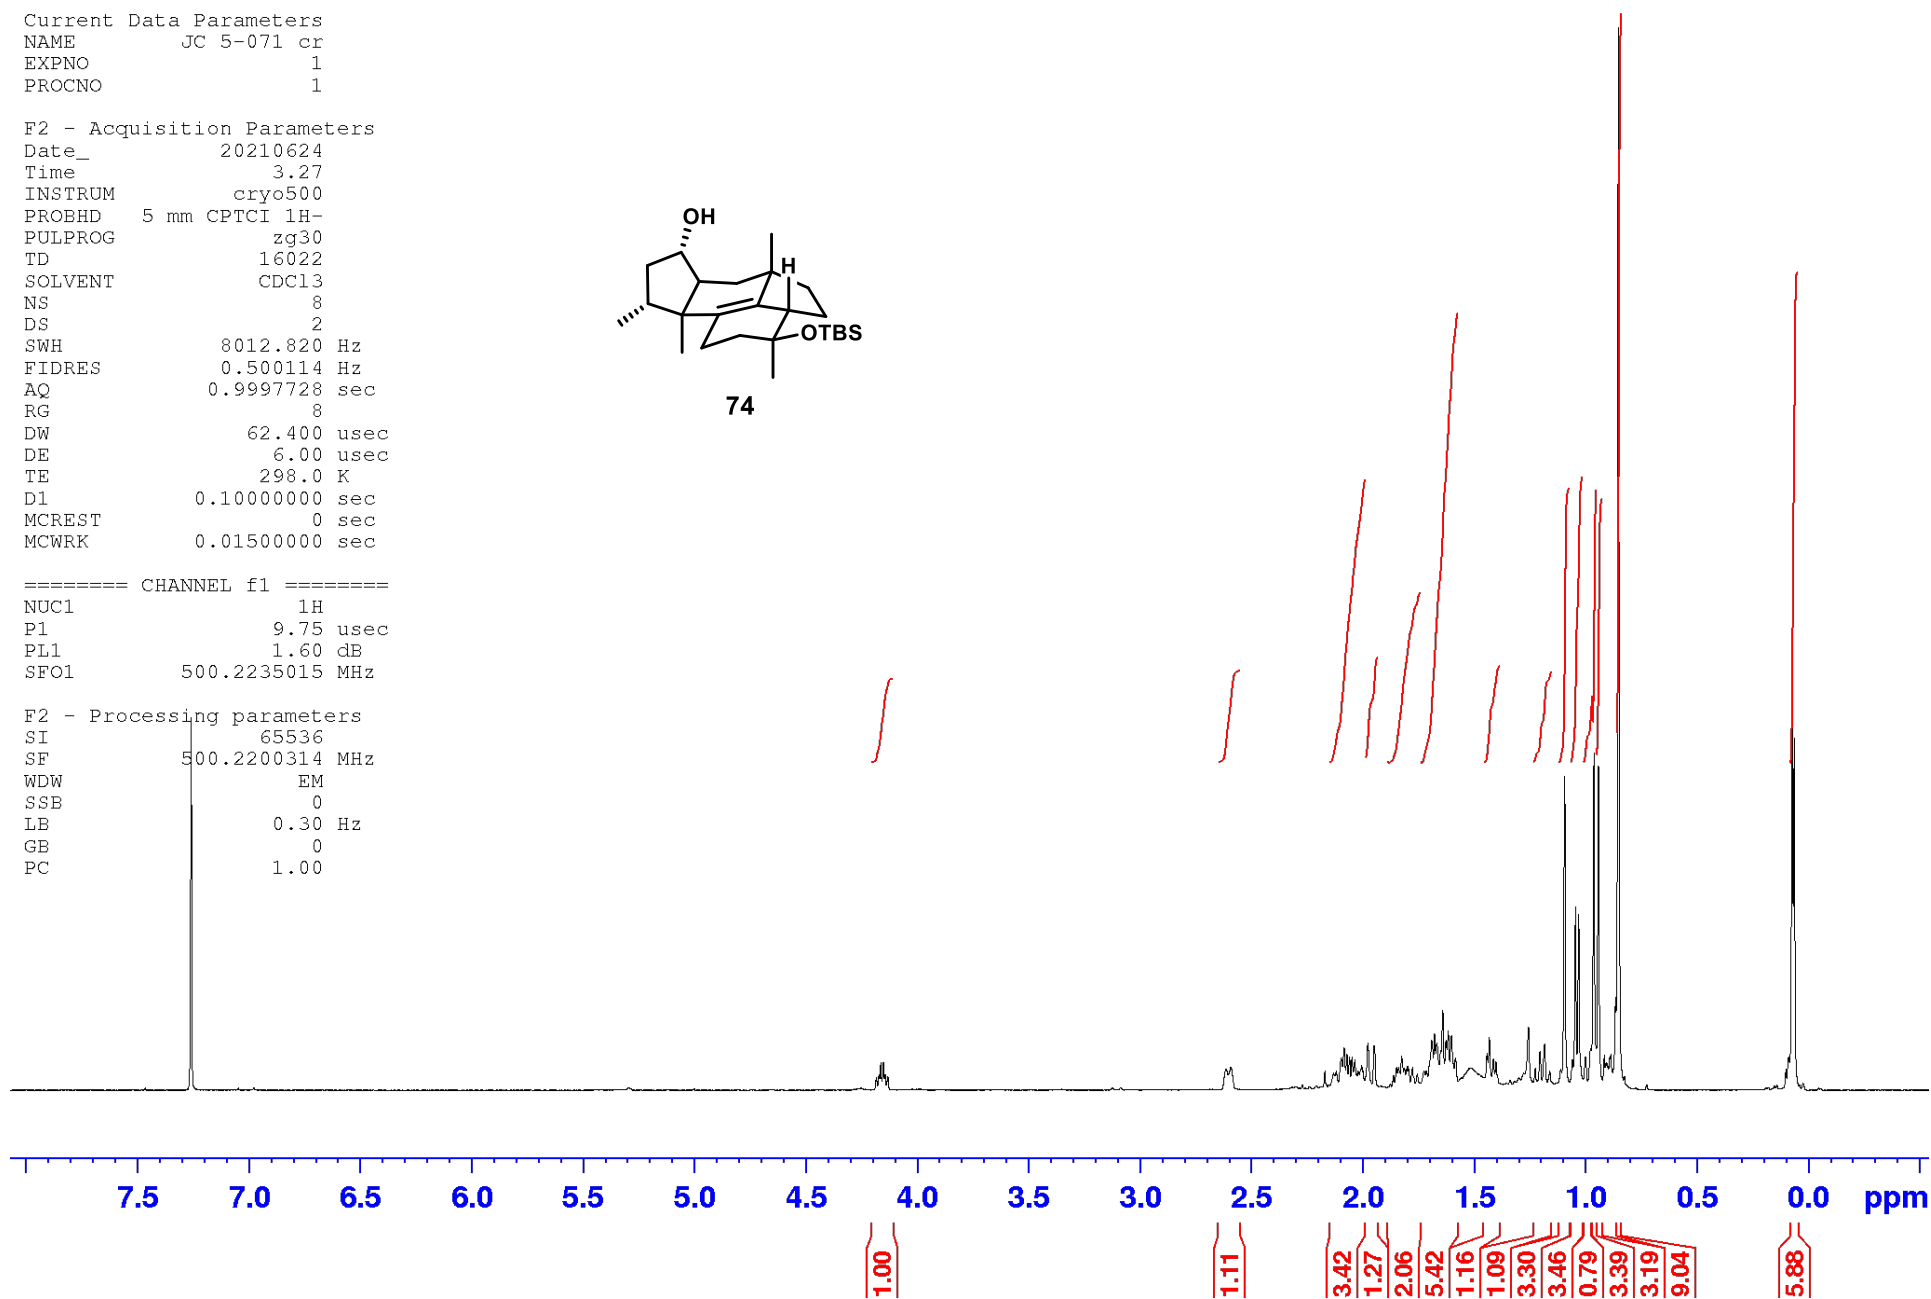

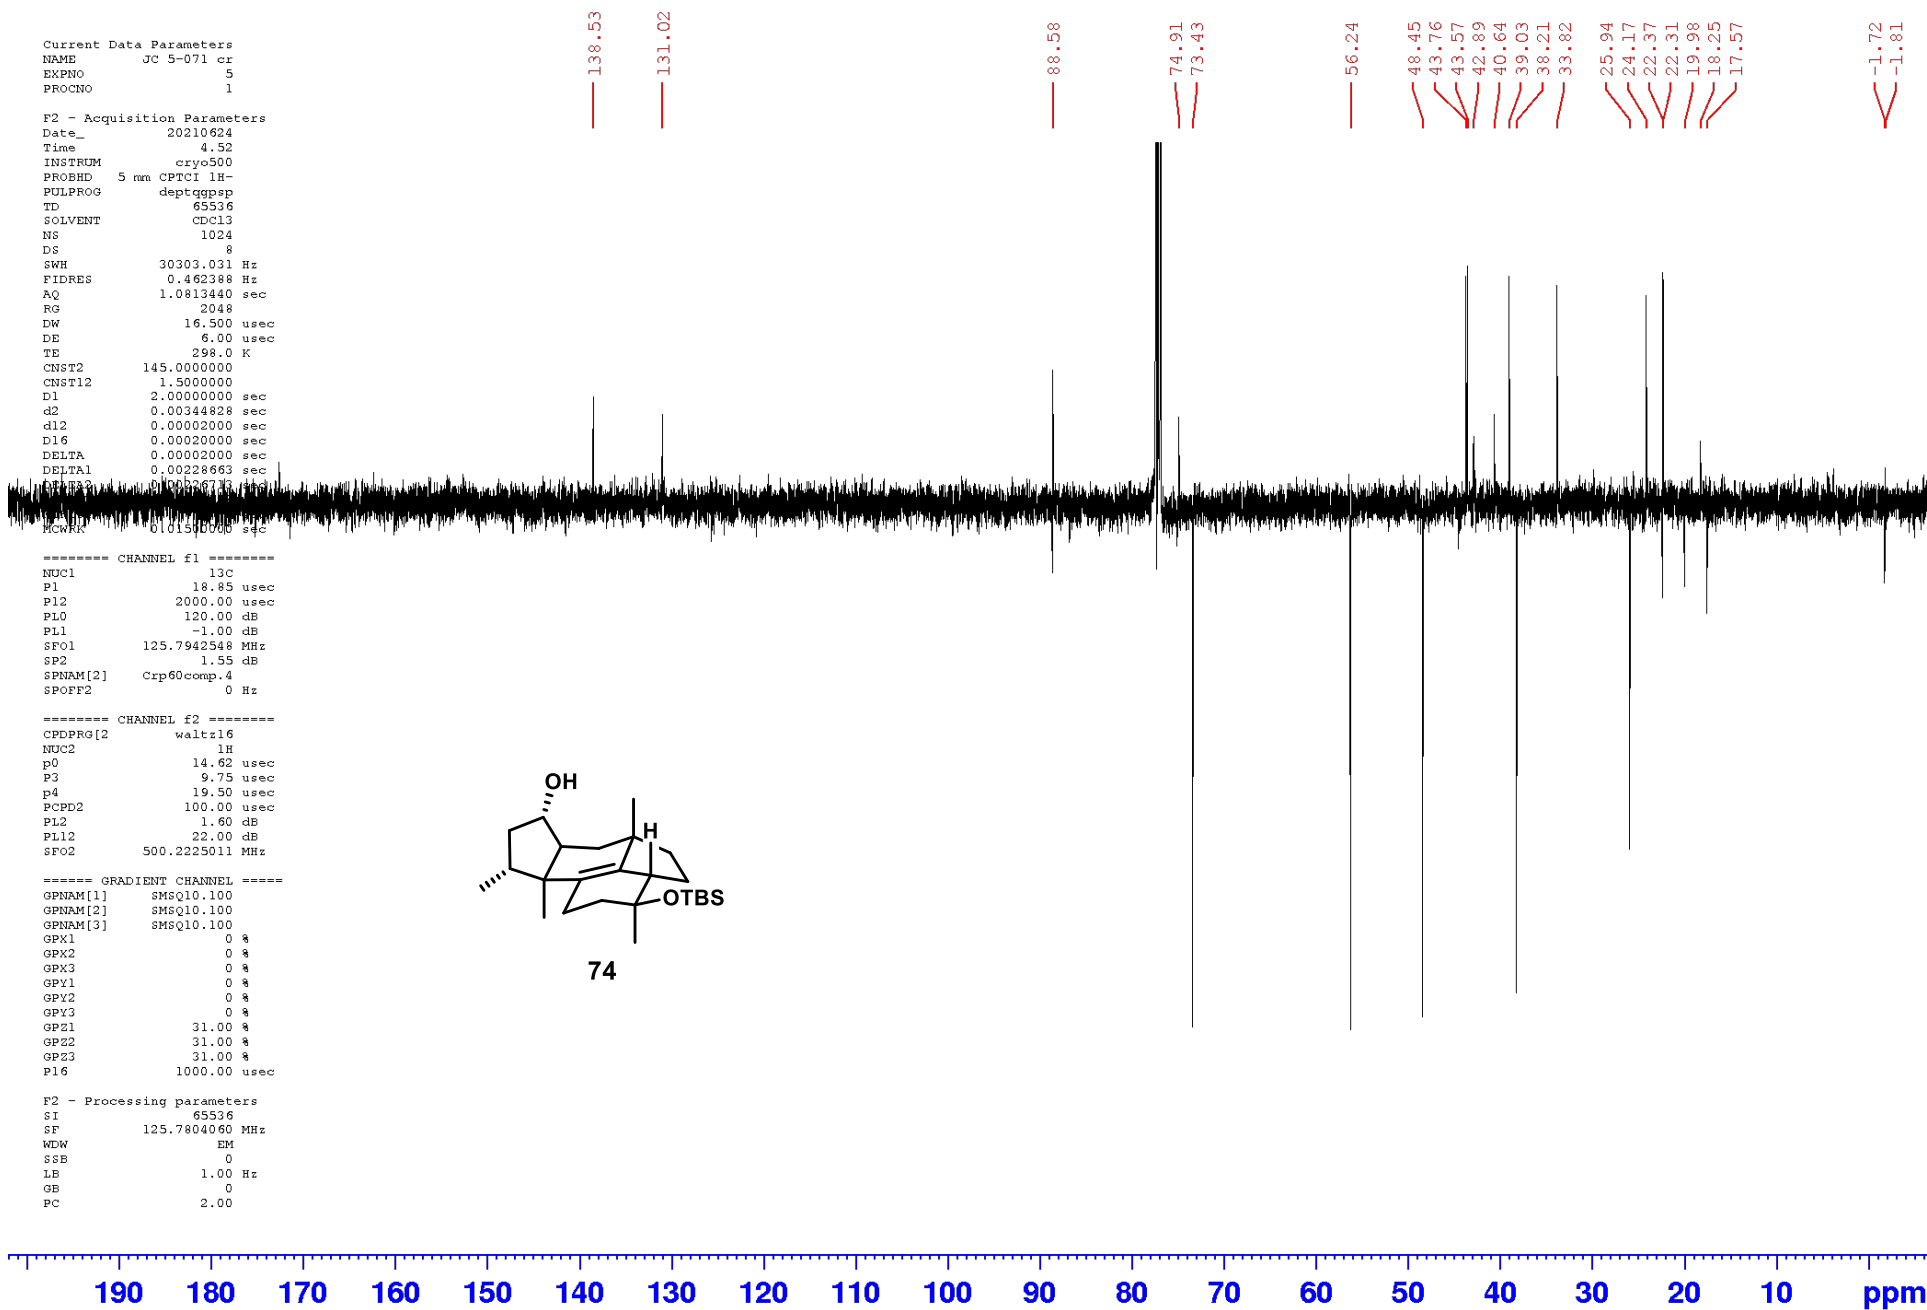

Current Data Parameters  
NAME JC 5-072 uwave carbonylene cr  
EXPNO 1  
PROCNO 1

F2 - Acquisition Parameters  
Date\_ 20210624  
Time 19.04  
INSTRUM cryo500  
PROBHD 5 mm CPTCI 1H-  
PULPROG zg30  
TD 16022  
SOLVENT CDCl3  
NS 8  
DS 2  
SWH 8012.820 Hz  
FIDRES 0.500114 Hz  
AQ 0.9997728 sec  
RG 6.3  
DW 62.400 usec  
DE 6.00 usec  
TE 298.0 K  
D1 0.1000000 sec  
MCREST 0 sec  
MCWRK 0.0150000 sec

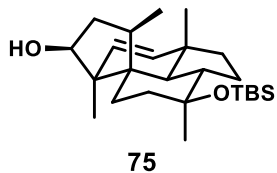

==== CHANNEL f1 =====  
NUC1 1H  
P1 9.75 usec  
PL1 1.60 dB  
SFO1 500.2235015 MHz

F2 - Processing parameters  
SI 65536  
SF 500.2200311 MHz  
WDW EM  
SSB 0  
LB 0.30 Hz  
GB 0  
PC 1.00

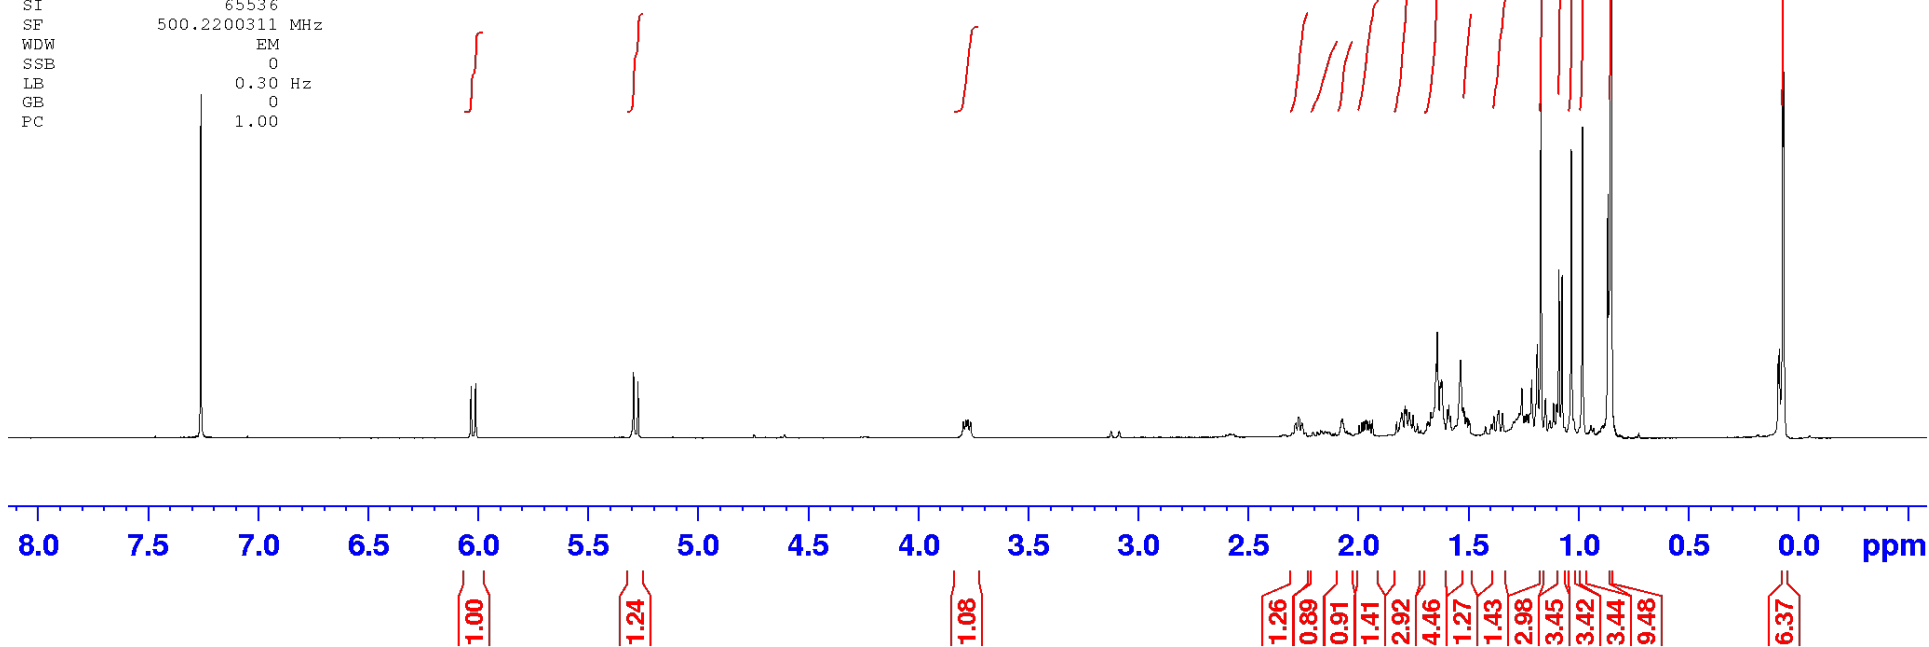



Current Data Parameters  
NAME JC 5-072 uaeve carbonylene cr  
EXPNO 2  
PROCNO 1

F2 - Acquisition Parameters  
Date\_ 20210624  
Time 19.08  
INSTRUM cryo500  
PROBHD 5 mm QNP1H-  
FULPRPG SpinEchoq30cp2.prd  
TD 65536  
SOLVENT CDCl3  
NS 89  
DS 16  
SWH 30303.031 Hz  
FIDRES 0.462388 Hz  
AQ 1.0813440 sec  
RG 8192  
DW 16.500 usec  
DE 6.00 usec  
TE 298.0 K  
DL 0.2500000 sec  
dL1 0.0300000 sec  
DL6 0.0002000 sec  
dL7 0.00019600 sec  
MCREST 0 sec  
MCWPK 0.0150000 sec  
F2 37.70 usec

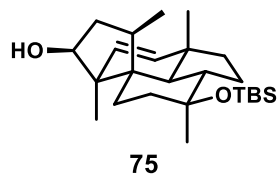

138.67  
131.20

79.30  
76.36

52.54  
51.82  
45.34  
44.25  
42.38  
42.19  
41.13  
39.57  
30.40  
29.63  
25.96  
22.33  
22.19  
20.77  
20.26  
19.97  
18.25

1.65  
1.70

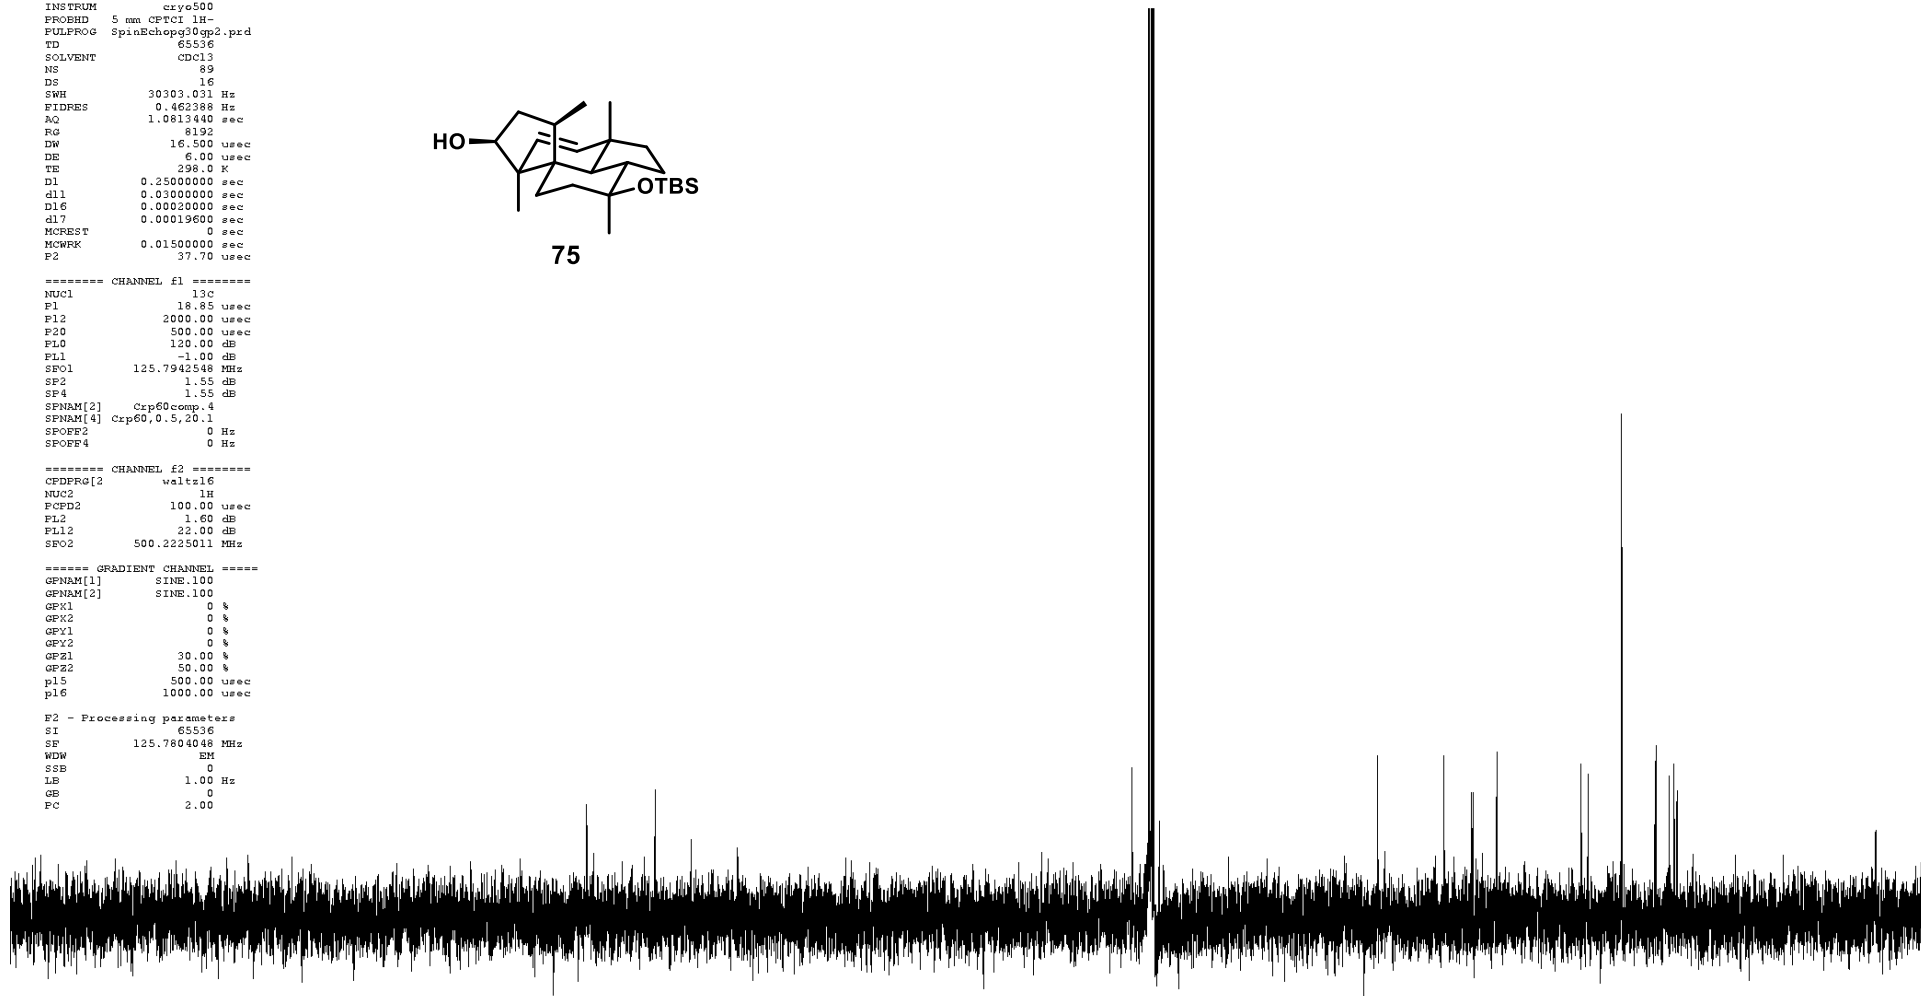

190 180 170 160 150 140 130 120 110 100 90 80 70 60 50 40 30 20 10 ppm

Current Data Parameters  
NAME JC 5-078 HCl rt cr  
EXPNO 1  
PROCNO 1

F2 - Acquisition Parameters  
Date\_ 20210625  
Time 22.01  
INSTRUM av600  
PROBHD 5 mm CPBBO BB-  
PULPROG zg30  
TD 19228  
SOLVENT CDCl3  
NS 8  
DS 2  
SWH 9615.385 Hz  
FIDRES 0.500072 Hz  
AQ 0.9998560 sec  
RG 32  
DW 52.000 usec  
DE 13.70 usec  
TE 298.0 K  
D1 0.10000000 sec  
TD0 1

==== CHANNEL f1 =====  
SFO1 600.1342009 MHz  
NUC1 1H  
P1 12.00 usec  
PLW1 28.00000000 W

F2 - Processing parameters  
SI 65536  
SF 600.1300349 MHz  
WDW EM  
SSB 0  
LB 0.30 Hz  
GB 0  
PC 1.00

crude reaction mixture suggests  
formation of desired product

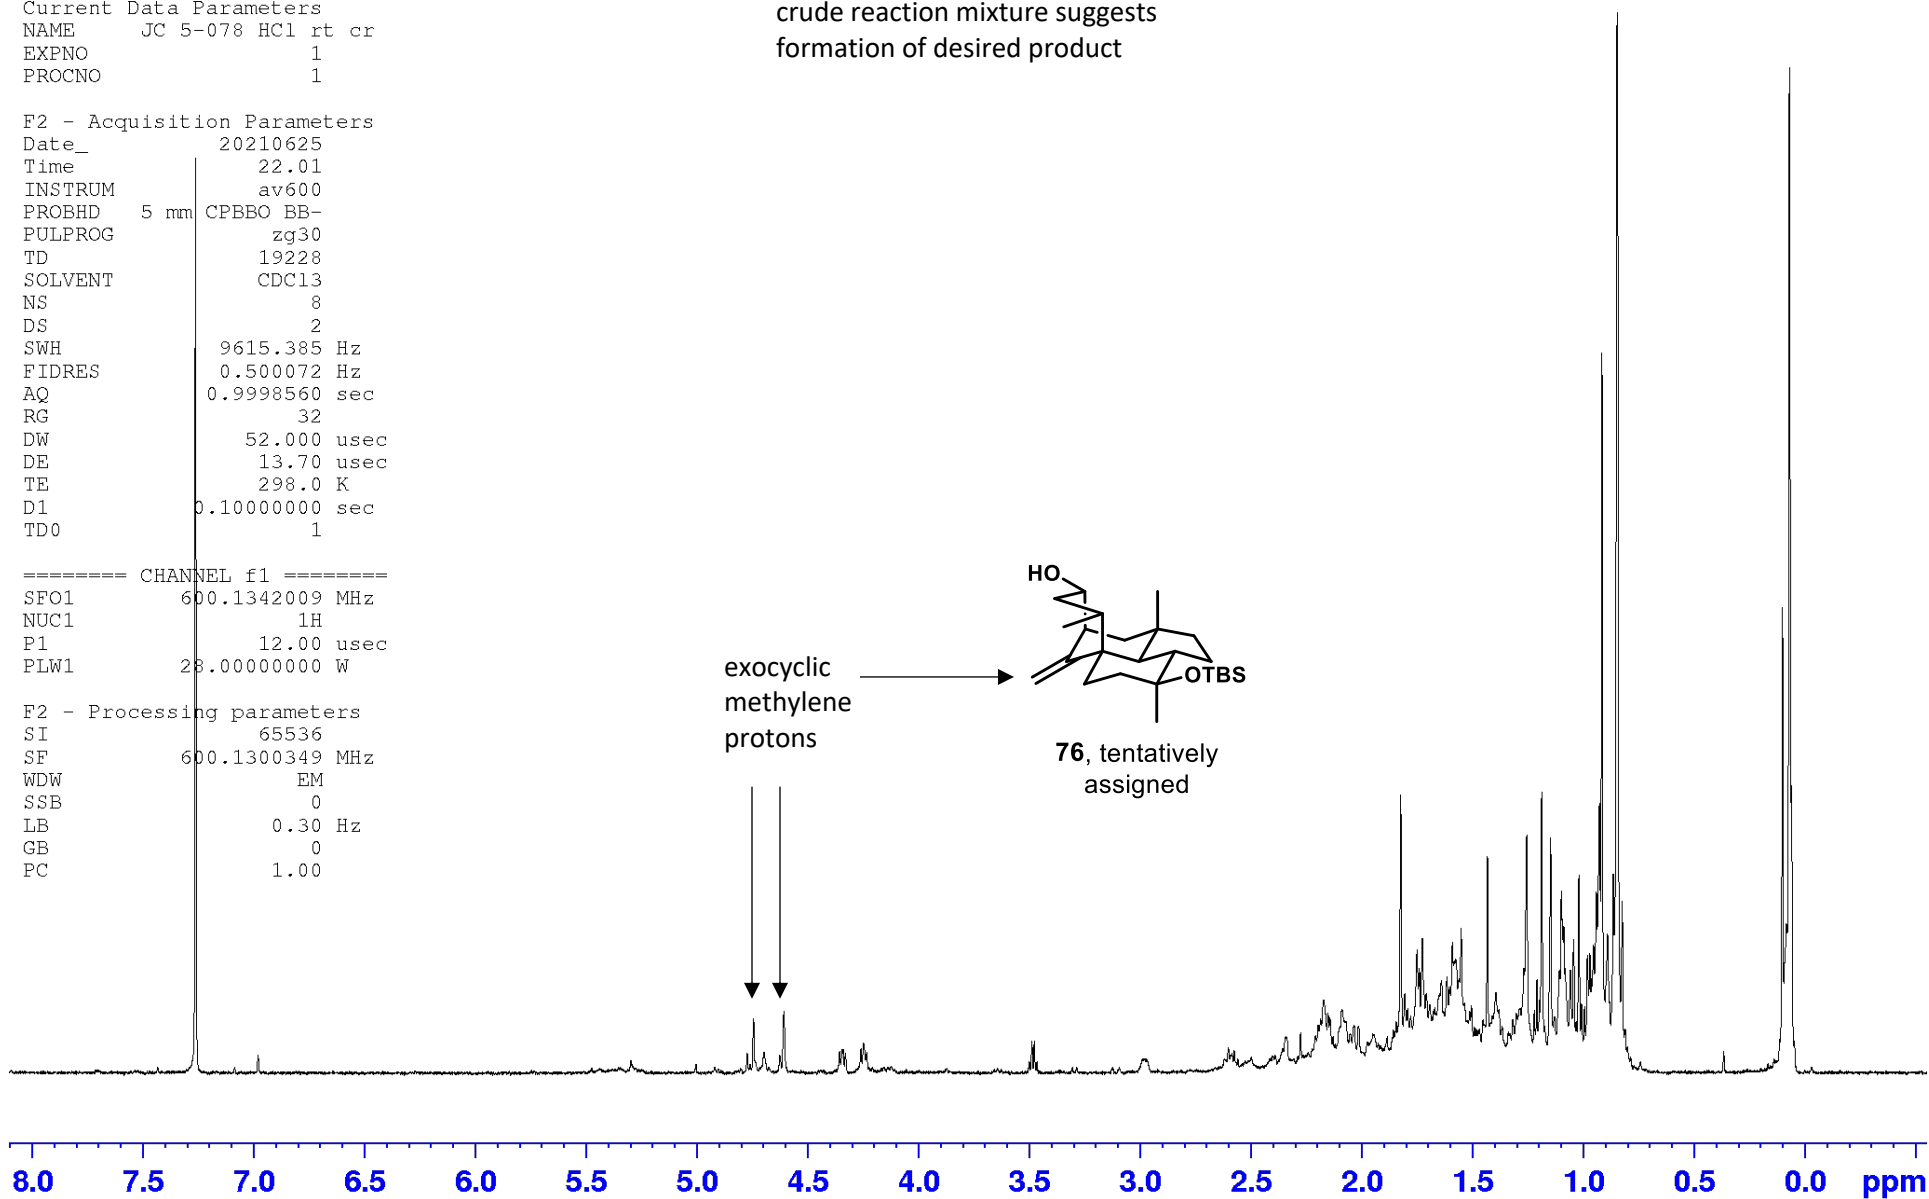

Current Data Parameters  
NAME JSCV-237V  
EXPNO 1  
PROCNO 1

F2 - Acquisition Parameters  
Date\_ 20220922  
Time 17.42  
INSTRUM gn500  
PROBHD 5 mm broadband  
PULPROG zg30  
TD 81728  
SOLVENT CDC13  
NS 8  
DS 2  
SWH 8012.820 Hz  
FIDRES 0.098043 Hz  
AQ 5.0998273 sec  
RG 2298.8  
DW 62.400 usec  
DE 6.00 usec  
TE 298.0 K  
D1 0.10000000 sec  
MCREST 0 sec  
MCWRK 0.01500000 sec

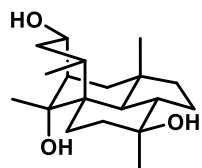

78, side product  
obtained in  
small quantity

==== CHANNEL f1 =====  
NUC1 1H  
P1 12.00 usec  
PL1 -6.00 dB  
SFO1 498.5534899 MHz  
  
F2 - Processing parameters  
SI 65536  
SF 498.5500257 MHz  
WDW EM  
SSB 0  
LB 0.30 Hz  
GB 0  
PC 1.00

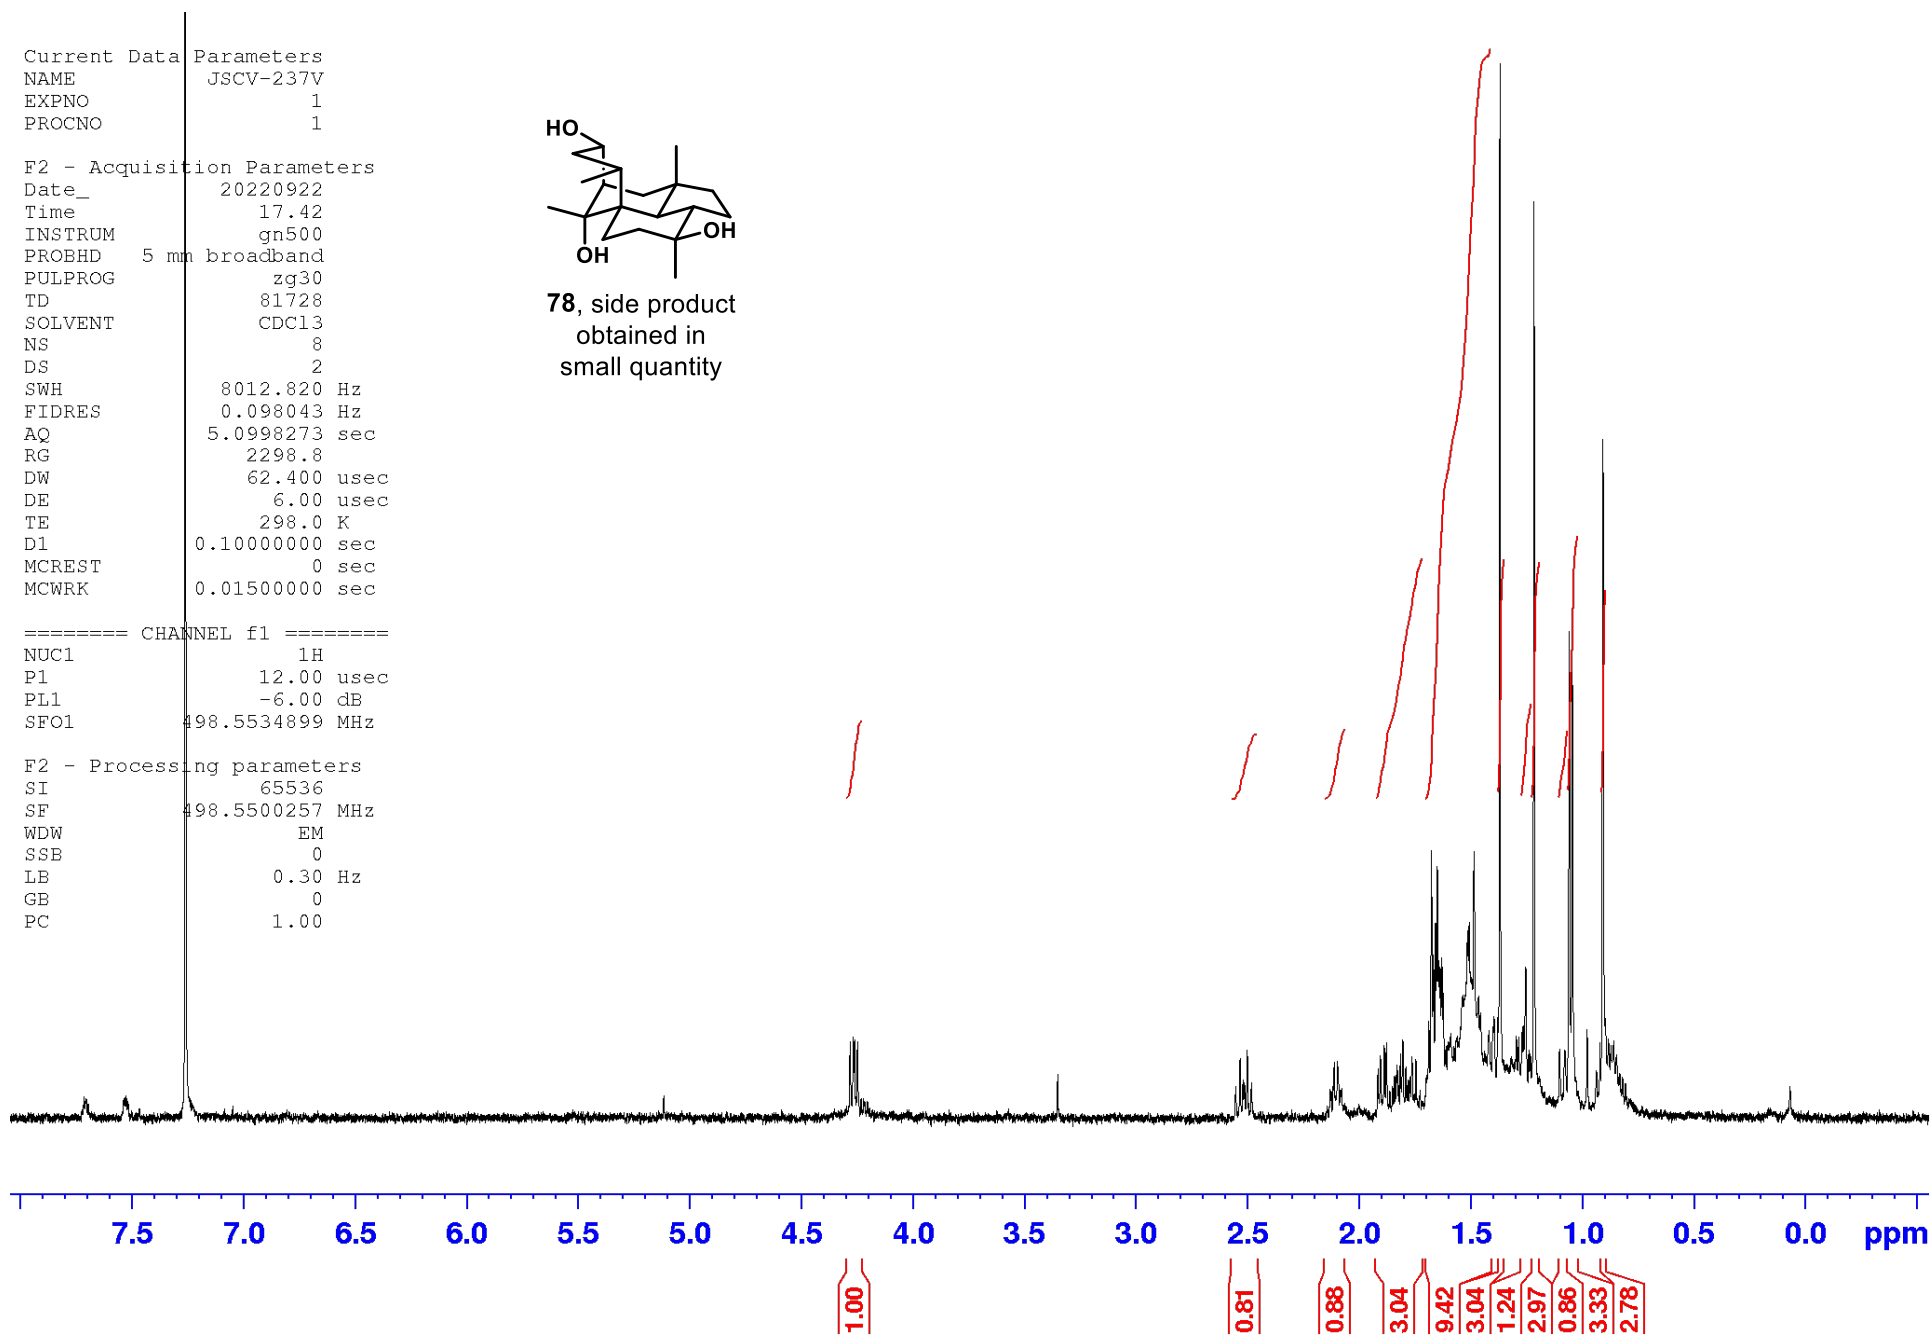

Current Data Parameters  
NAME JSCV-237V-2  
EXPNO 3  
PROCNO 1

F2 - Acquisition Parameters  
Date\_ 20220923  
Time 18.38  
INSTRUM av600  
PROBHD 5 mm CPTCI 1H-  
PULPROG deptqgppsp  
TD 65536  
SOLVENT cdcl3  
NS 228  
DS 8  
SWH 36231.883 Hz  
FIDRES 0.552855 Hz  
AQ 0.9043968 sec  
RG 2050  
DW 13.800 usec  
DE 18.00 usec  
TE 298.0 K  
CNST2 145.0000000  
CNST12 1.5000000  
D1 2.00000000 sec  
D2 0.00344828 sec  
D12 0.00002000 sec  
D16 0.00020000 sec  
TDO 1

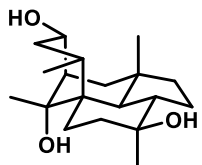

78, side product  
obtained in  
small quantity

===== CHANNEL f1 =====  
SFO1 150.9194080 MHz  
NUC1 13C  
P1 18.75 usec  
P13 2000.00 usec  
PLW0 0 W  
PLW1 164.00000000 W  
SFMAM[5] Crp60comp.4

===== CHANNEL f2 =====  
SFO2 600.1330010 MHz  
NUC2 1H  
CPDPRG[2] waltz16  
P0 12.00 usec  
P3 8.00 usec  
P4 16.00 usec  
PCPD2 80.00 usec  
PLW2 6.16599989 W  
PLW12 0.04466800 W

===== GRADIENT CHANNEL =====  
GFNAM[1] SMSQ10.100  
GFNAM[2] SMSQ10.100  
GFNAM[3] SMSQ10.100  
GFZ1 31.00 %  
GFZ2 31.00 %  
GFZ3 31.00 %  
P16 1000.00 usec

F2 - Processing parameters  
SI 65536  
SF 150.9027935 MHz  
WDW EM  
SSB 0  
LB 1.00 Hz  
GB 0  
PC 1.00

73.90  
73.83  
72.23  
52.25  
50.17  
43.42  
41.17  
41.07  
40.83  
40.74  
38.94  
27.07  
25.82  
24.82  
21.88  
21.64  
20.59  
19.76

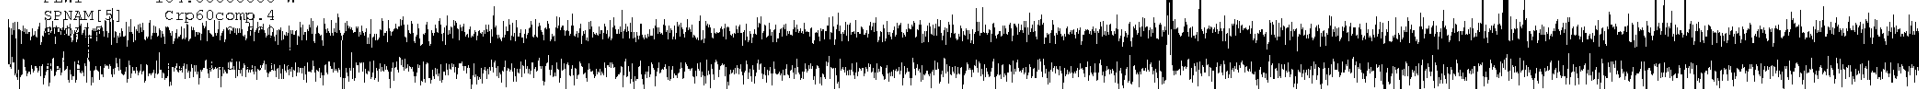

190 180 170 160 150 140 130 120 110 100 90 80 70 60 50 40 30 20 10 ppm

Current Data Parameters  
NAME JSCV-237V-2  
EXPNO 5  
PROCNO 1

F2 - Acquisition Parameters  
Date\_ 20220923  
Time 18.53  
INSTRUM av600  
PROBHD 5 mm CPTCI 1H-  
PULPROG cosygpgf  
TD 2048  
SOLVENT CDCl3  
NS 1  
DS 16  
SWH 9615.385 Hz  
FIDRES 4.695012 Hz  
AQ 0.1064960 sec  
RG 2050  
DW 52.000 usec  
DE 10.00 usec  
TE 298.0 K  
DO 0.00000300 sec  
D1 1.48689198 sec  
D13 0.00000400 sec  
D16 0.00020000 sec  
INO 0.00010400 sec

==== CHANNEL f1 =====  
SFO1 600.1342009 MHz  
NUC1 1H  
PO 8.00 usec  
P1 8.00 usec  
PLW1 6.16599989 W

===== GRADIENT CHANNEL =====  
GPNAM[1] SMSQ10.100  
GPZ1 10.00 %  
P16 1000.00 usec

F1 - Acquisition parameters  
TD 256  
SFO1 600.1342 MHz  
FIDRES 75.120193 Hz  
SW 16.022 ppm  
FnMODE QF

F2 - Processing parameters  
SI 1024  
SF 600.1300323 MHz  
WDW SINE  
SSB 0  
LB 0 Hz  
GB 0  
PC 1.00

F1 - Processing parameters  
SI 1024  
MC2 QF  
SF 600.1300360 MHz  
WDW SINE  
SSB 0  
LB 0 Hz  
GB 0

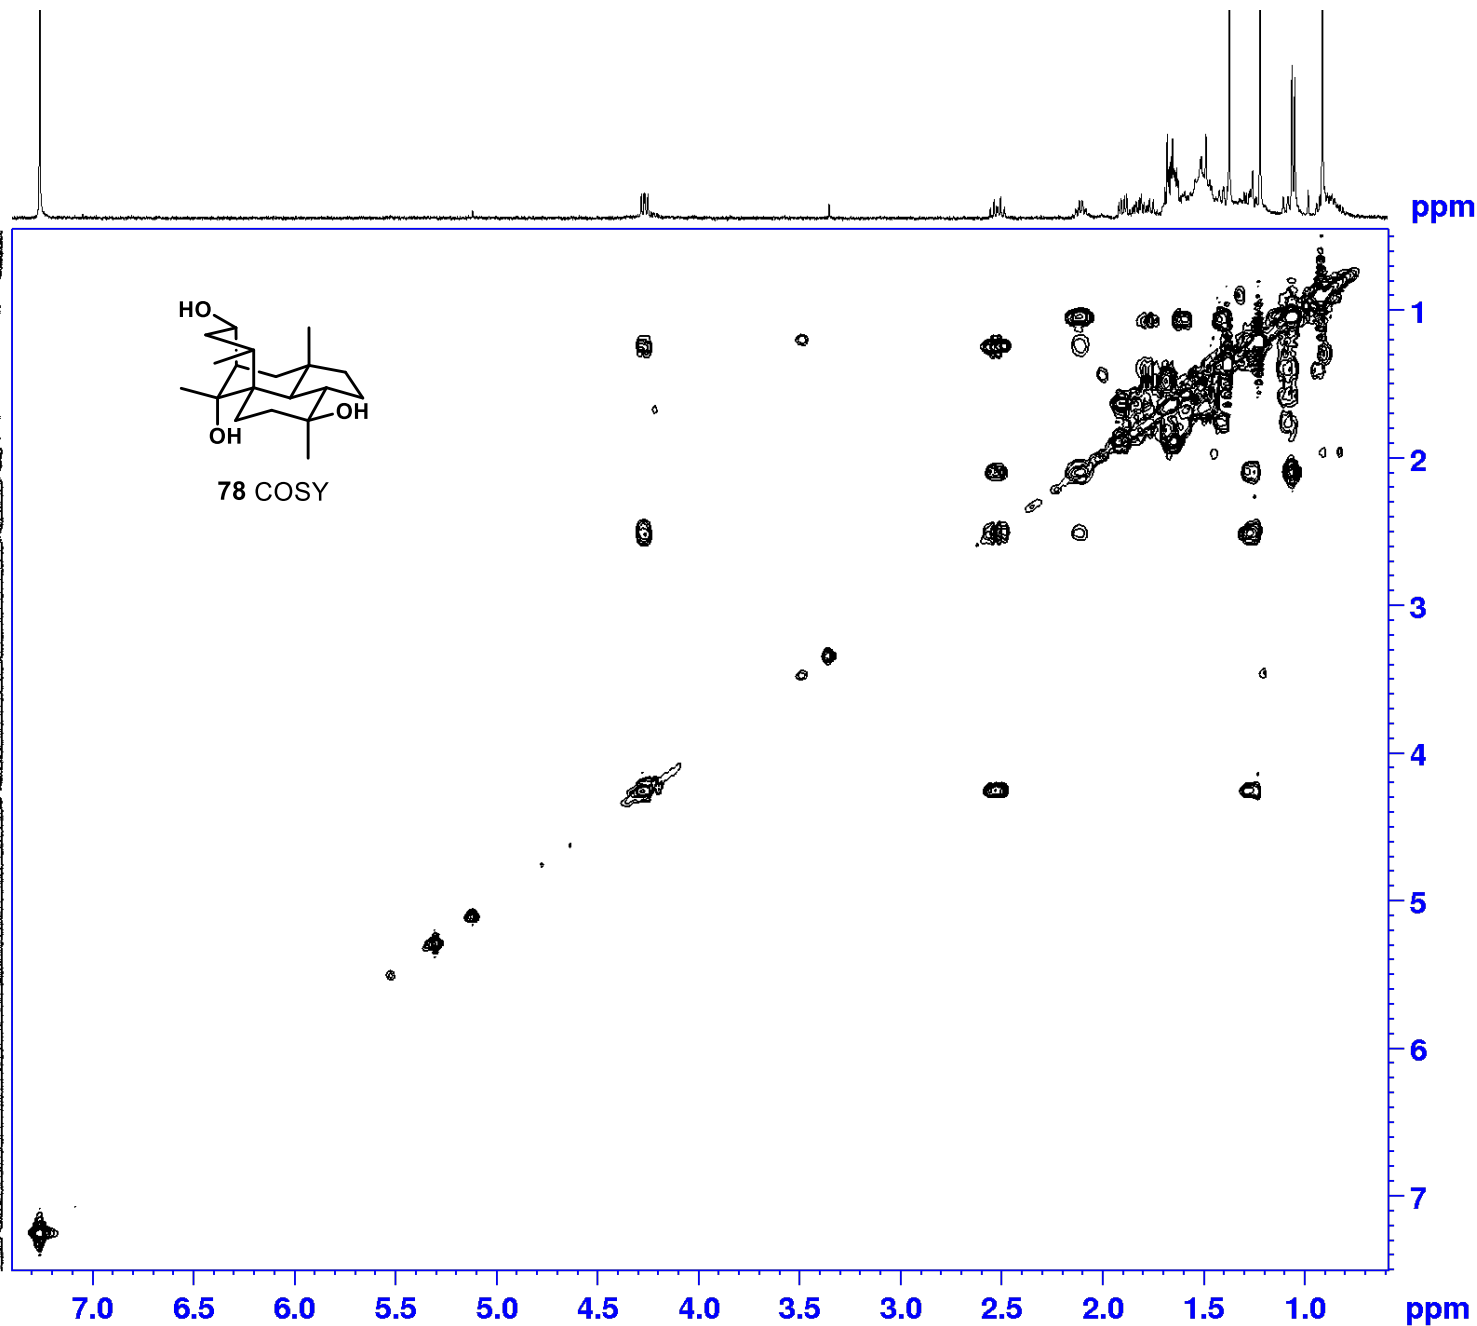

```

Current Data Parameters
NAME      JSCV-237V-2
EXPNO    4
PROCNO    1

F2 - Acquisition Parameters
Date_    20220923
Time     16.43
INSTRUM  av600
PROBHD   5 mm CPTCI 1H-
PULPROG  hsqcztgppp.2
TD       1024
SOLVENT  cdcl3
NS       2
DS       16
SWH      9615.385 Hz
FIDRES   9.390024 Hz
AQ       0.0532480 sec
RG       2050
DW       52.000 usec
DE       10.00 usec
TE       297.9 K
CNST2    145.0000000
DO       0.0000300 sec
D1       1.1000002 sec
D4       0.00172414 sec
D11      0.03000000 sec
D16      0.00020000 sec
IN0      0.00001380 sec
ZOOPTNS

===== CHANNEL f1 =====
SF01    600.1342009 MHz
NUC1     1H
P1       8.00 usec
P2       16.00 usec
P28      0 usec
PLW1     6.1659989 W

===== CHANNEL f2 =====
SF02    150.9194083 MHz
NUC2     13C
CPDPRG2  gssp
P3       18.75 usec
P4       500.00 usec
P24      2000.00 usec
PCPD2    65.00 usec
PLW0     0 W
PLW2    164.0000000 W
PLW12    13.80399990 W
SFOAL3[3] Crp60,0.5,20.1
SFOAL3   0.500
SFOFFS3  0 Hz
SPW3     92.25700378 W
SFOAL7[7] Crp60comp,4
SFOAL7   0.500
SFOFFS7  0 Hz
SPW7     92.25700378 W

===== GRADIENT CHANNEL =====
GPNAM[1] SMSQ10.100
GPNAM[2] SMSQ10.100
GPZ1     80.00 %
GPZ2     20.10 %
F16      1000.00 usec

F1 - Acquisition parameters
TD       256
SF01     150.9194 MHz
FIDRES   283.061584 Hz
SW       240.074 ppm
FaMODE   Echo-Antiecho

F2 - Processing parameters
SI       1024
SF       600.1300360 MHz
WDW      EM
SSB      0
LB       5.00 Hz
GB       0
FC       1.00

F1 - Processing parameters
SI       1024
MC2      echo-antiecho
SF       150.9028030 MHz
WDW      QSINE
SSB      3
LB       0 Hz
GB       0

```

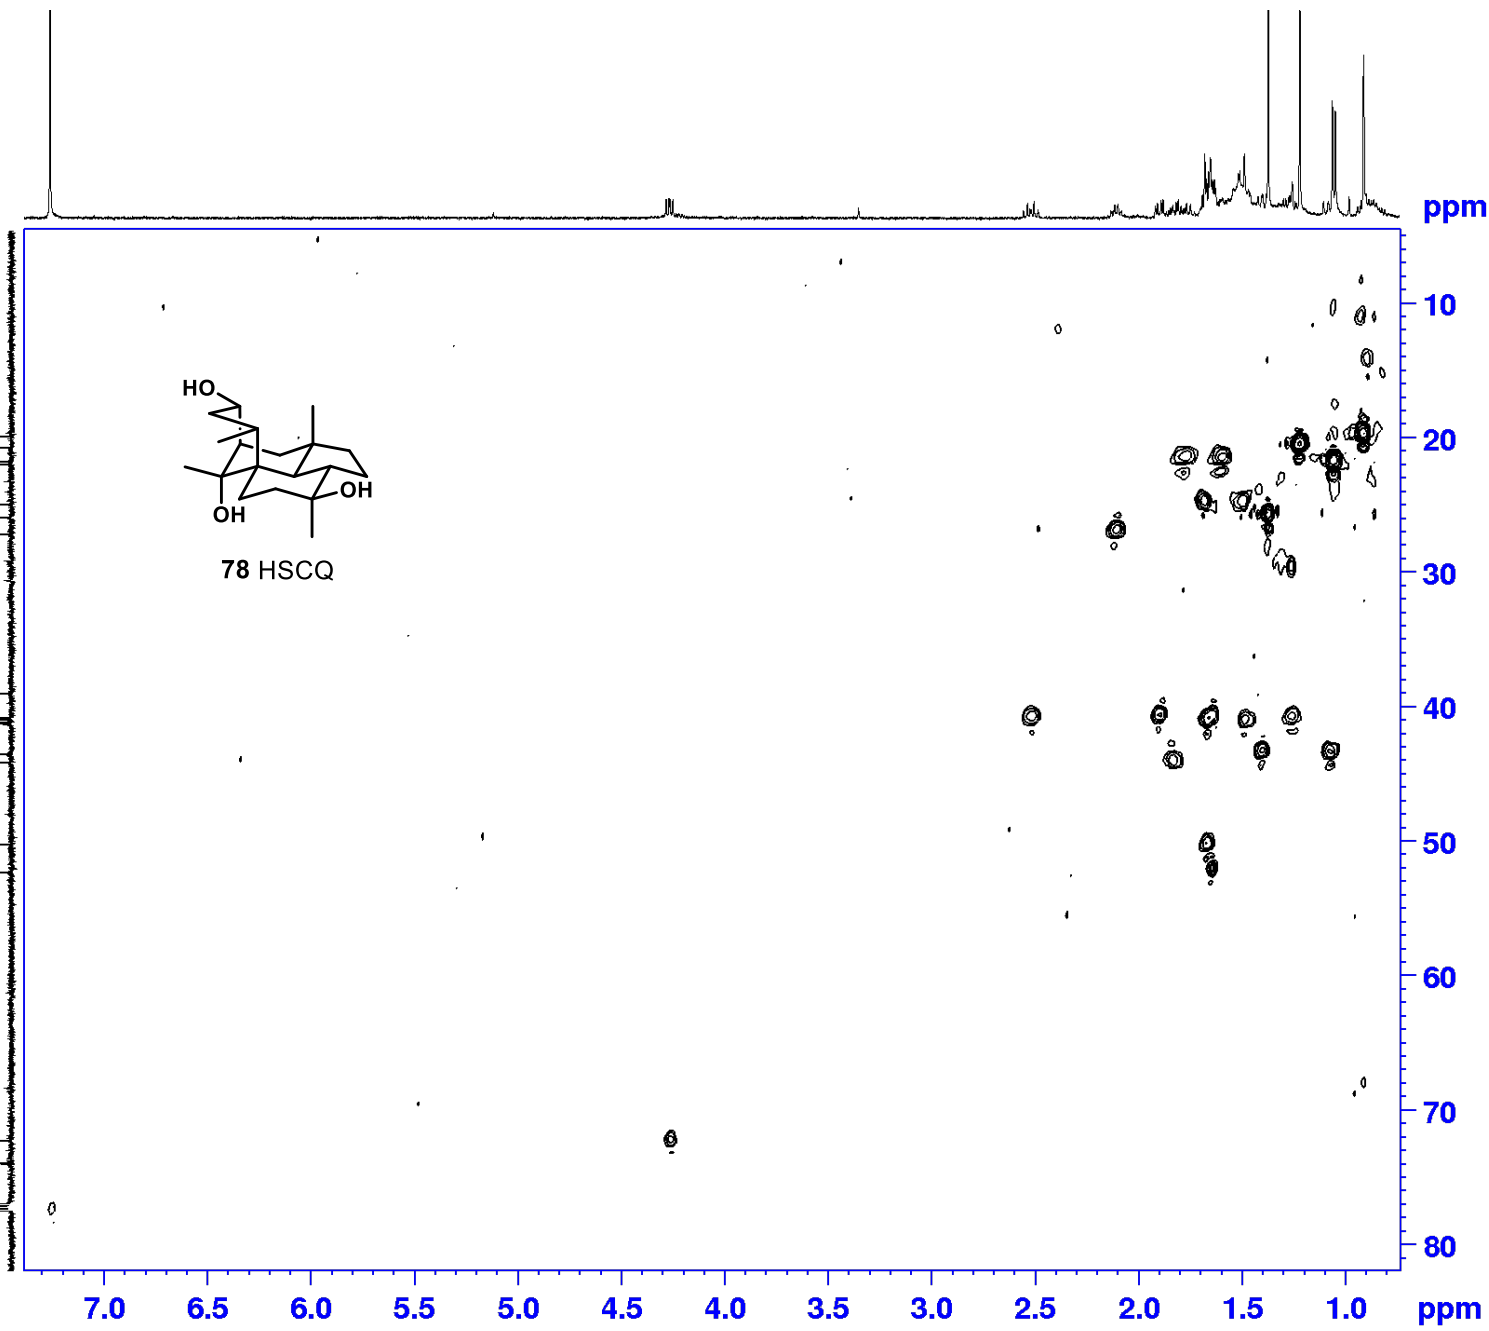

Current Data Parameters  
NAME JSCV-237V-2  
EXPNO 6  
PROCNO 1

F2 - Acquisition Parameters

Date\_ 20220923  
Time 19.02  
INSTRUM av600  
PROBHD 5 mm CPTCI 1H-  
PULPROG hmbcgp1pndqf  
TD 4096  
SOLVENT CDCl3  
NS 2  
DS 16  
SWH 9615.385 Hz  
FIDRES 2.347506 Hz  
AQ 0.2129920 sec  
RG 2050  
DW 52.000 usec  
DE 10.00 usec  
TE 298.0 K  
CNST2 145.0000000  
CNST13 10.0000000  
D0 0.00000300 sec  
D1 1.10000002 sec  
D2 0.00344828 sec  
D6 0.05000000 sec  
D16 0.00020000 sec  
IN0 0.00001380 sec

----- CHANNEL f1 -----  
SFO1 600.1342009 MHz  
NUC1 1H  
P1 8.00 usec  
P2 16.00 usec  
PLW1 6.16599989 W

----- CHANNEL f2 -----  
SFO2 150.9194083 MHz  
NUC2 13C  
P3 18.75 usec  
PLW2 164.00000000 W

----- GRADIENT CHANNEL -----  
GPNAM[1] SMSQ10.100  
GPNAM[2] SMSQ10.100  
GPNAM[3] SMSQ10.100  
GPZ1 50.00 %  
GPZ2 30.00 %  
GPZ3 40.10 %  
P16 1000.00 usec

F1 - Acquisition parameters  
TD 256  
SFO1 150.9194 MHz  
FIDRES 283.061584 Hz  
SW 240.074 ppm  
FnMODE QF

F2 - Processing parameters  
SI 2048  
SF 600.1300314 MHz  
WDW SINE  
SSB 0  
LB 0 Hz  
GB 0  
PC 1.00

F1 - Processing parameters  
SI 1024  
MC2 QF  
SF 150.9028090 MHz  
WDW SINE  
SSB 0  
LB 0 Hz  
GB 0

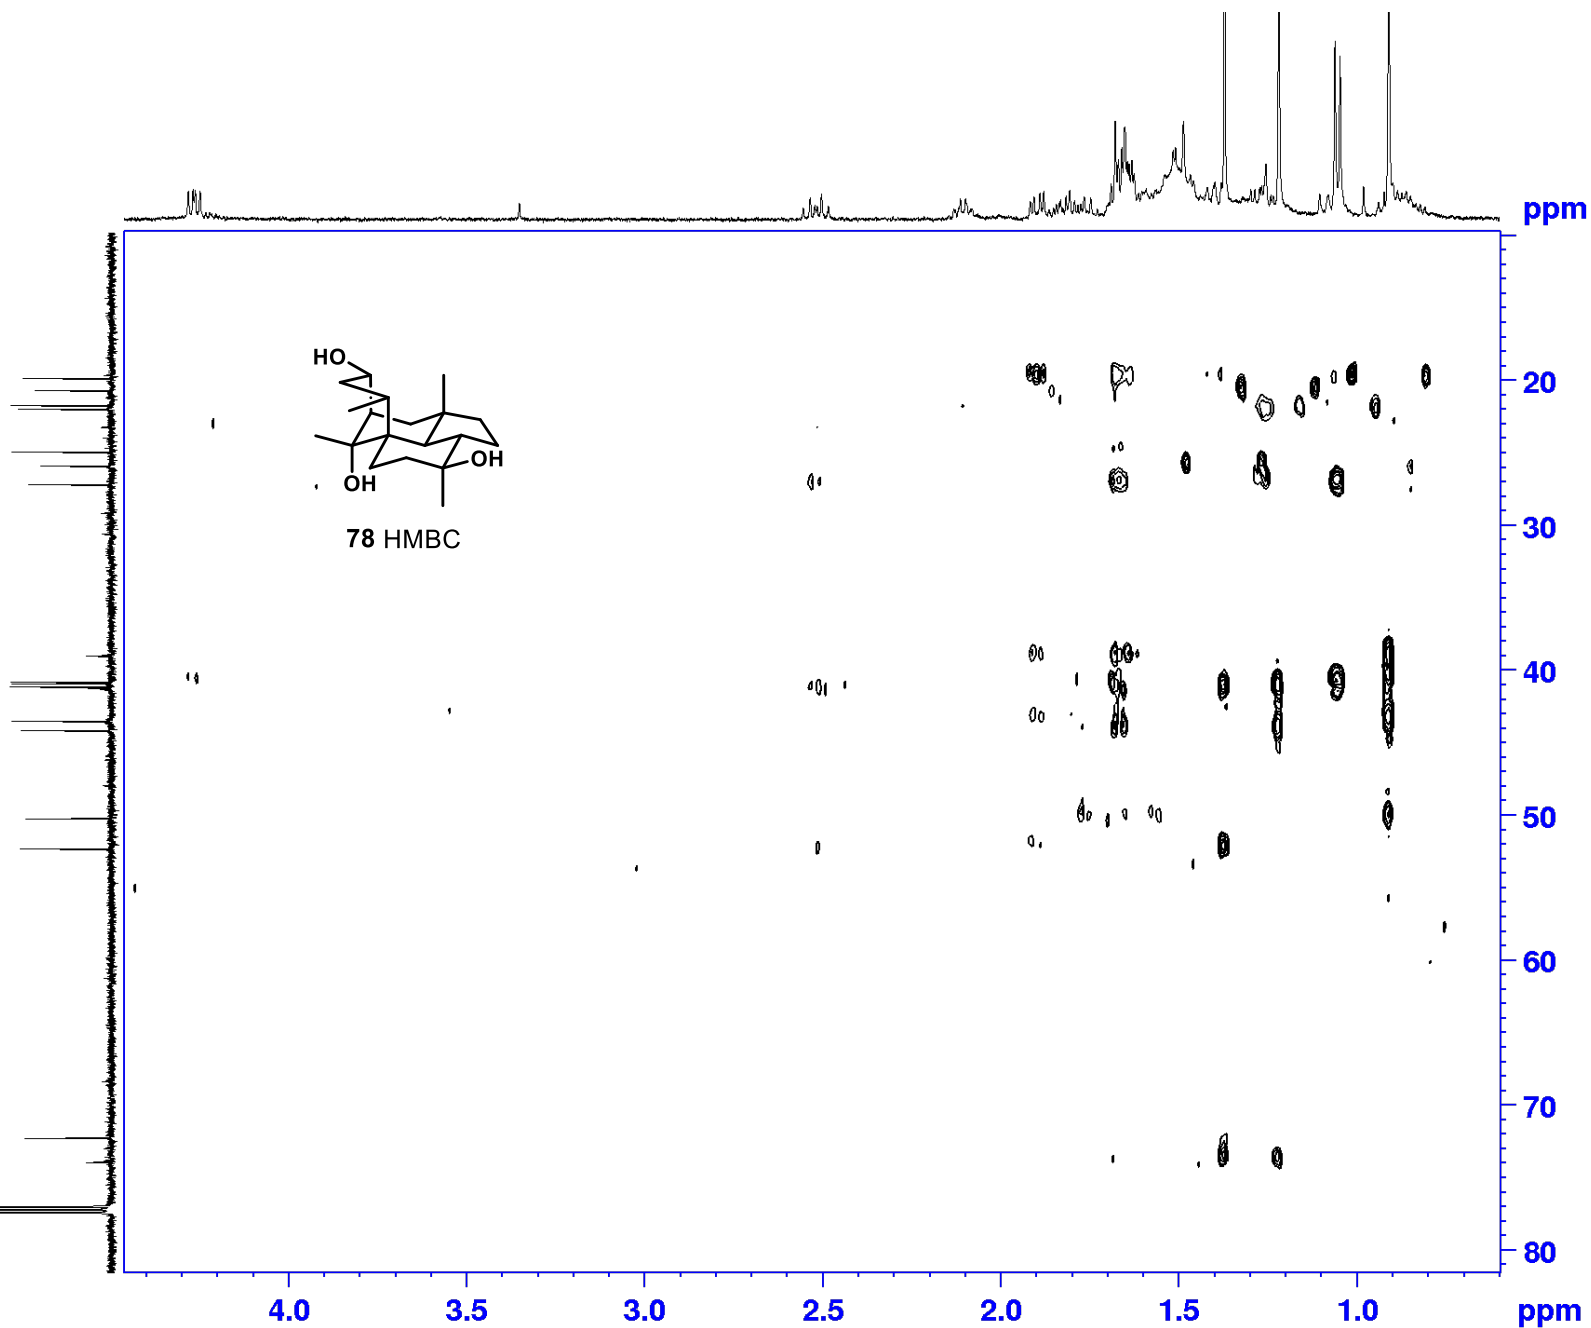

Current Data Parameters  
NAME JSCV-237V-2  
EXPNO 7  
PROCNO 1

F2 - Acquisition Parameters  
Date\_ 20220923  
Time 19.15  
INSTRUM av600  
PROBHD 5 mm CPTCI 1H-  
PULPROG noesygp  
TD 2048  
SOLVENT CDCl3  
NS 2  
DS 16  
SWH 9615.385 Hz  
FIDRES 4.695012 Hz  
AQ 0.1064960 sec  
RG 2050  
DW 52.000 usec  
DE 17.63 usec  
TE 298.0 K  
D0 0.00004181 sec  
D1 2.00000000 sec  
D8 1.00000000 sec  
D16 0.00020000 sec  
IN0 0.00010400 sec

----- CHANNEL f1 -----  
SFO1 600.1342009 MHz  
NUC1 1H  
P1 8.00 usec  
P2 16.00 usec  
PLW1 6.16599989 W

----- GRADIENT CHANNEL -----  
GPNAM[1] SMSQ10.100  
GPZ1 40.00 %  
P16 1000.00 usec

F1 - Acquisition parameters  
TD 256  
SFO1 600.1342 MHz  
FIDRES 75.120193 Hz  
SW 16.022 ppm  
FnMODE States-TPPI

F2 - Processing parameters  
SI 1024  
SF 600.1300326 MHz  
WDW QSINE  
SSB 2  
LB 0 Hz  
GB 0  
PC 1.00

F1 - Processing parameters  
SI 1024  
MC2 States-TPPI  
SF 600.1300347 MHz  
WDW QSINE  
SSB 2  
LB 0 Hz  
GB 0

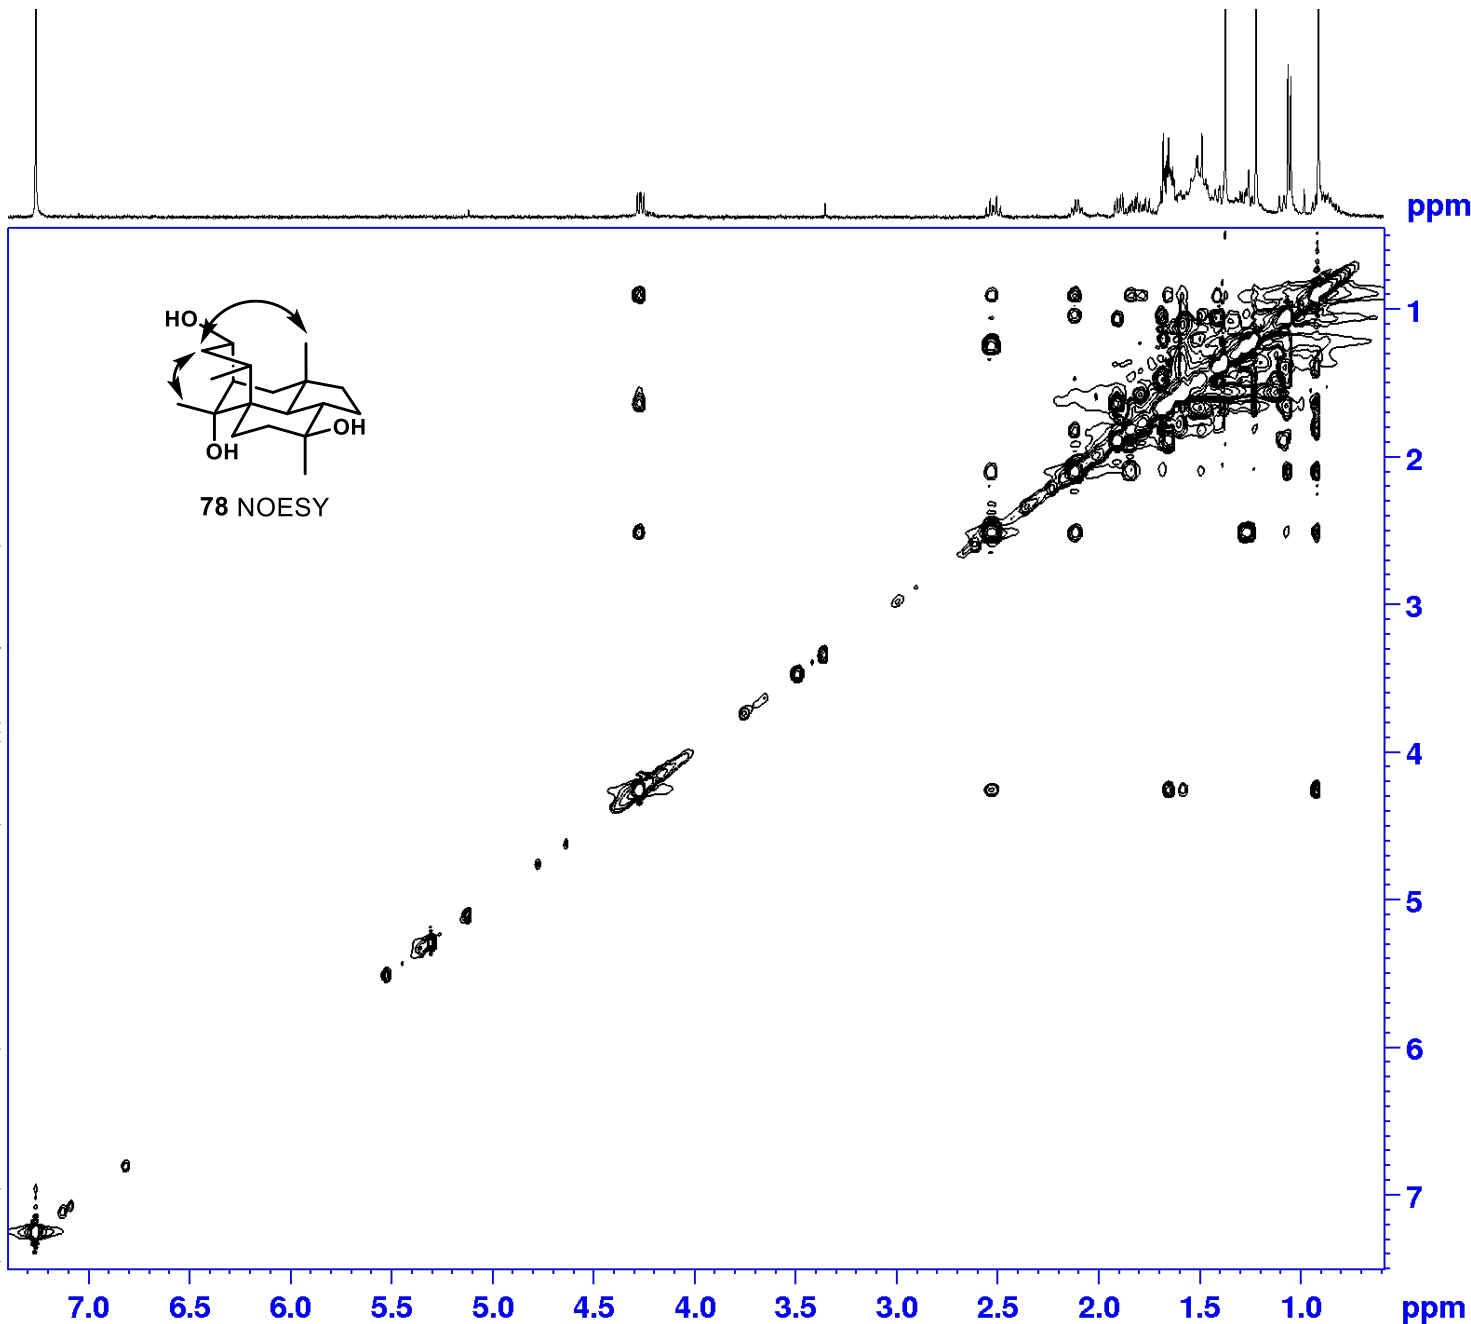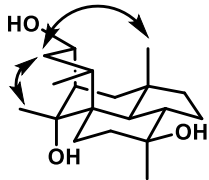



Current Data Parameters  
NAME JSCV-074-concd-rxn-mixture  
EXPNO 1  
PROCNO 1

F2 - Acquisition Parameters  
Date\_ 20220211  
Time 17.53  
INSTRUM av600  
PROBHD 5 mm CPBBO BB-  
PULPROG zg30  
TD 48074  
SOLVENT CDCl3  
NS 8  
DS 2  
SWH 8403.361 Hz  
FIDRES 0.174801 Hz  
AQ 2.8604031 sec  
RG 10  
DW 59.500 usec  
DE 16.75 usec  
TE 297.9 K  
D1 3.00000000 sec  
TDO 1

===== CHANNEL f1 =====  
SFO1 600.1336008 MHz  
NUC1 1H  
P1 9.50 usec  
PLW1 30.00000000 W

F2 - Processing parameters  
SI 65536  
SF 600.1300342 MHz  
WDW EM  
SSB 0  
LB 0.30 Hz  
GB 0  
PC 1.00

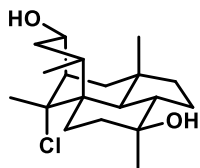

**79**, concentrated  
reaction mixture.  
Impure due to  
instability on SiO<sub>2</sub>

1,4-dioxane

Silicone  
grease

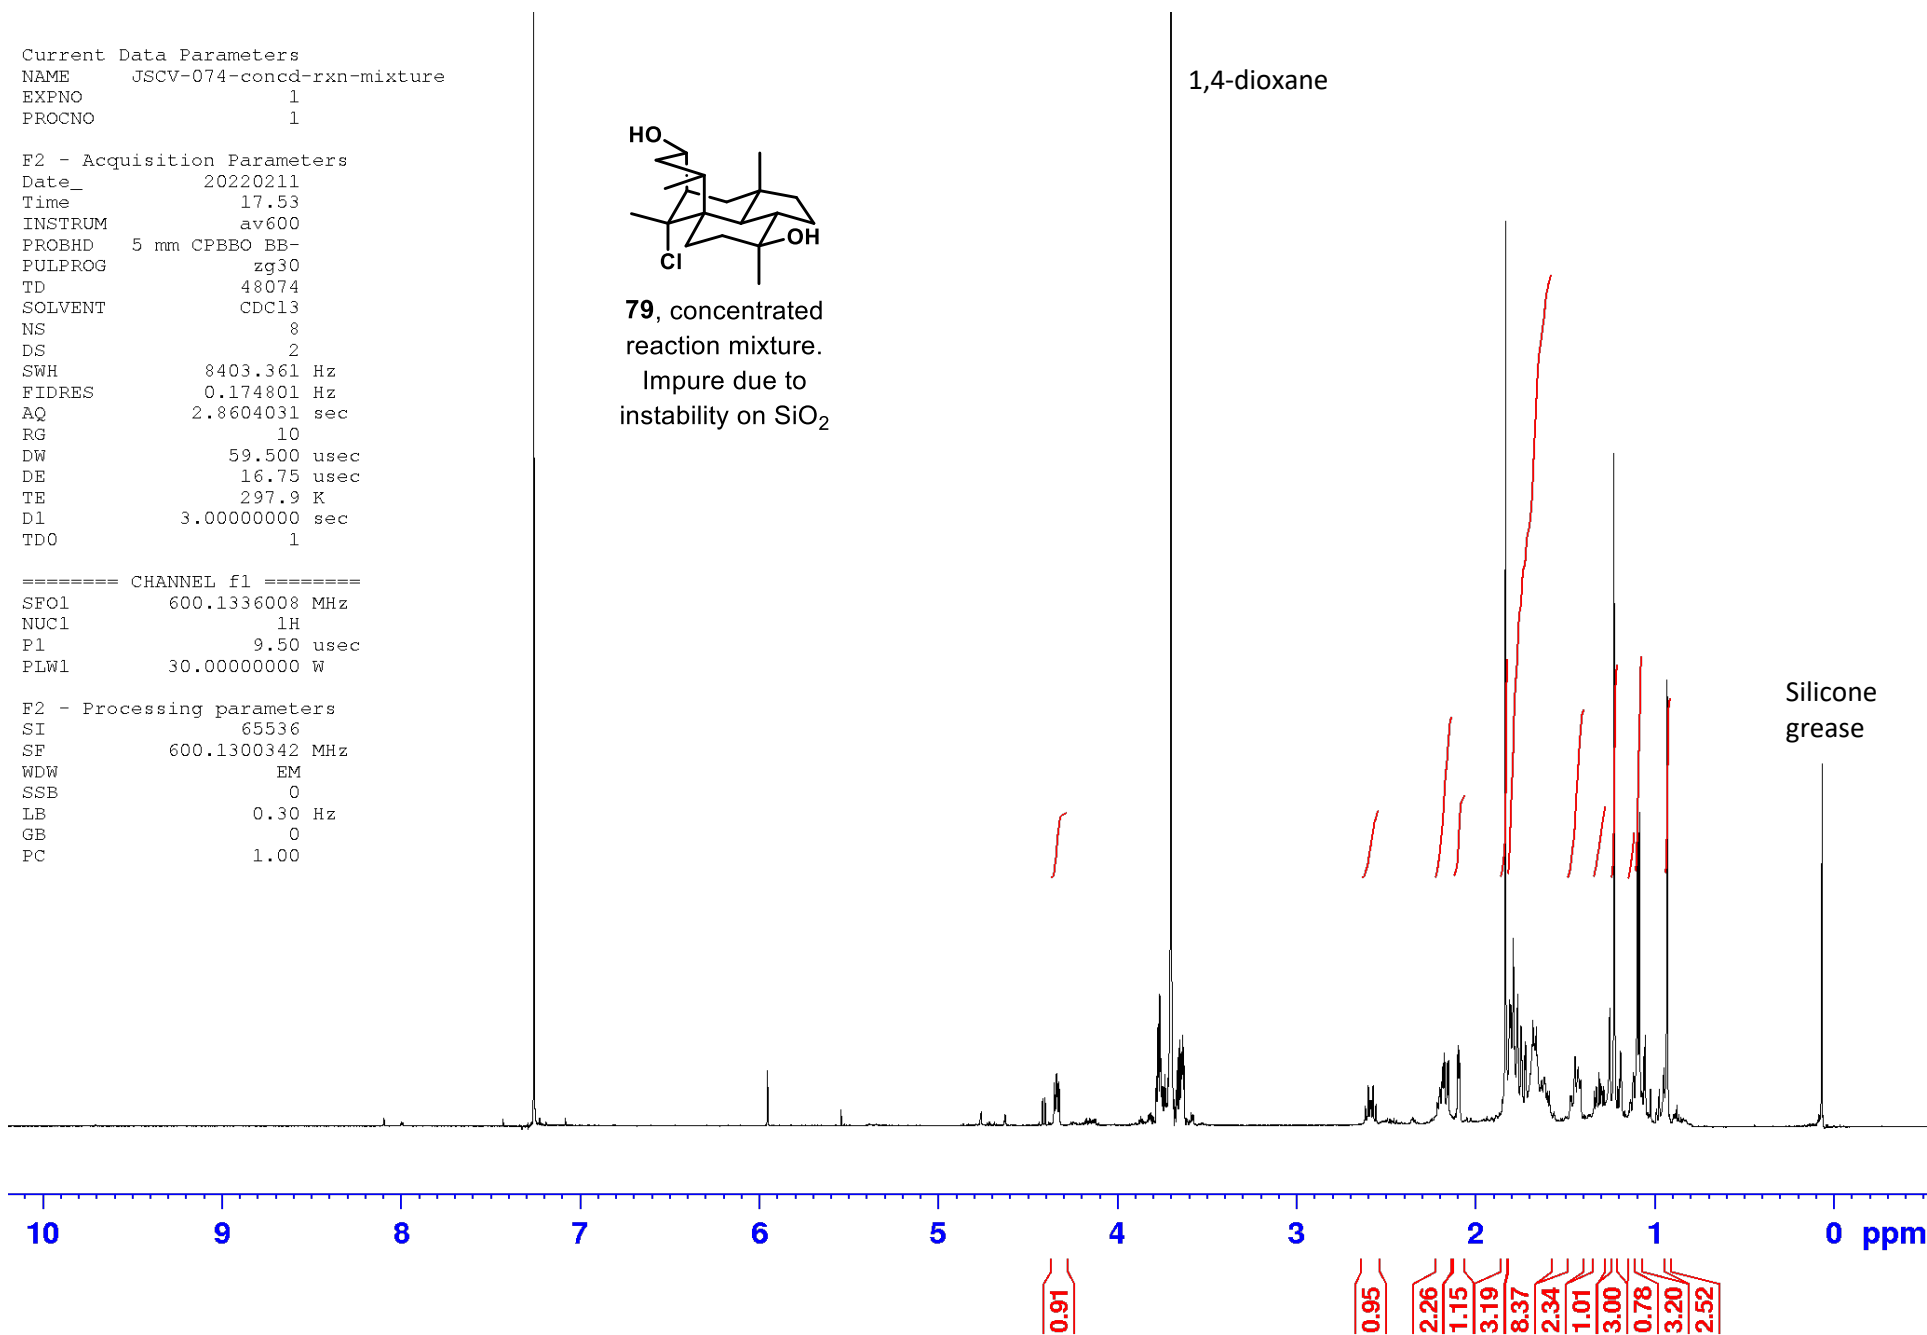

Current Data Parameters  
 NAME JSCV-074-concd-rxn-mixture  
 EXPNO 2  
 PROCNO 1

F2 - Acquisition Parameters  
 Date\_ 20220211  
 Time 17.57  
 INSTRUM av600  
 PROBHD 5 mm CPBBO BB-  
 PULPROG zgdc30  
 TD 65536  
 SOLVENT CDC13  
 NS 415  
 DS 4  
 SWH 36231.883 Hz  
 FIDRES 0.552855 Hz  
 AQ 0.9043968 sec  
 RG 2050  
 DW 13.800 usec  
 DE 19.63 usec  
 TE 298.0 K  
 D1 0.4000001 sec  
 D11 0.03000000 sec  
 TD0 1

==== CHANNEL f1 =====  
 SFO1 150.9194080 MHz  
 NUC1 13C  
 P1 10.10 usec  
 PLW1 64.00000000 W

==== CHANNEL f2 =====  
 SFO2 600.1330010 MHz  
 NUC2 1H  
 CPDPRG[2] waltz16  
 PCPD2 80.00 usec  
 PLW2 30.00000000 W  
 PLW12 0.37154001 W

F2 - Processing parameters  
 SI 65536  
 SF 150.9027934 MHz  
 WDW EM  
 SSB 0  
 LB 1.00 Hz  
 GB 0  
 PC 1

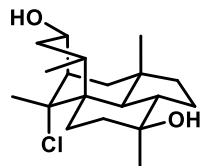

**79**, concentrated  
 reaction mixture.  
 Impure due to  
 instability on SiO<sub>2</sub>

86.16  
 73.86  
 72.45  
 54.71  
 51.95  
 44.23  
 43.25  
 42.46  
 41.98  
 40.90  
 40.58  
 38.89  
 28.51  
 27.76  
 26.94  
 22.24  
 21.63  
 20.63  
 19.52

1,4-dioxane

Silicone  
 grease

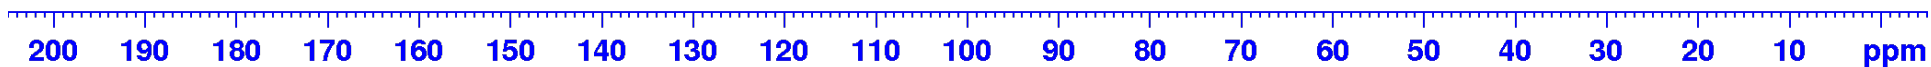

Current Data Parameters  
NAME JSCV-122-col5-f5-8  
EXPNO 1  
PROCNO 1

F2 - Acquisition Parameters  
Date\_ 20220411  
Time 15.48  
INSTRUM gn500  
PROBHD 5 mm broadband  
PULPROG zg30  
TD 40062  
SOLVENT CDCl3  
NS 32  
DS 2  
SWH 8012.820 Hz  
FIDRES 0.200010 Hz  
AQ 2.4998689 sec  
RG 2896.3  
DW 62.400 usec  
DE 6.00 usec  
TE 298.0 K  
D1 3.0000000 sec  
MCREST 0 sec  
MCWRK 0.01500000 sec

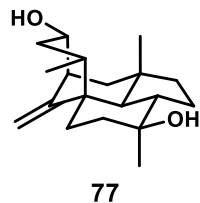

==== CHANNEL f1 =====  
NUC1 1H  
P1 12.00 usec  
PL1 -6.00 dB  
SFO1 498.6534906 MHz

F2 - Processing parameters  
SI 65536  
SF 498.6500284 MHz  
WDW EM  
SSB 0  
LB 0.30 Hz  
GB 0  
PC 1.00

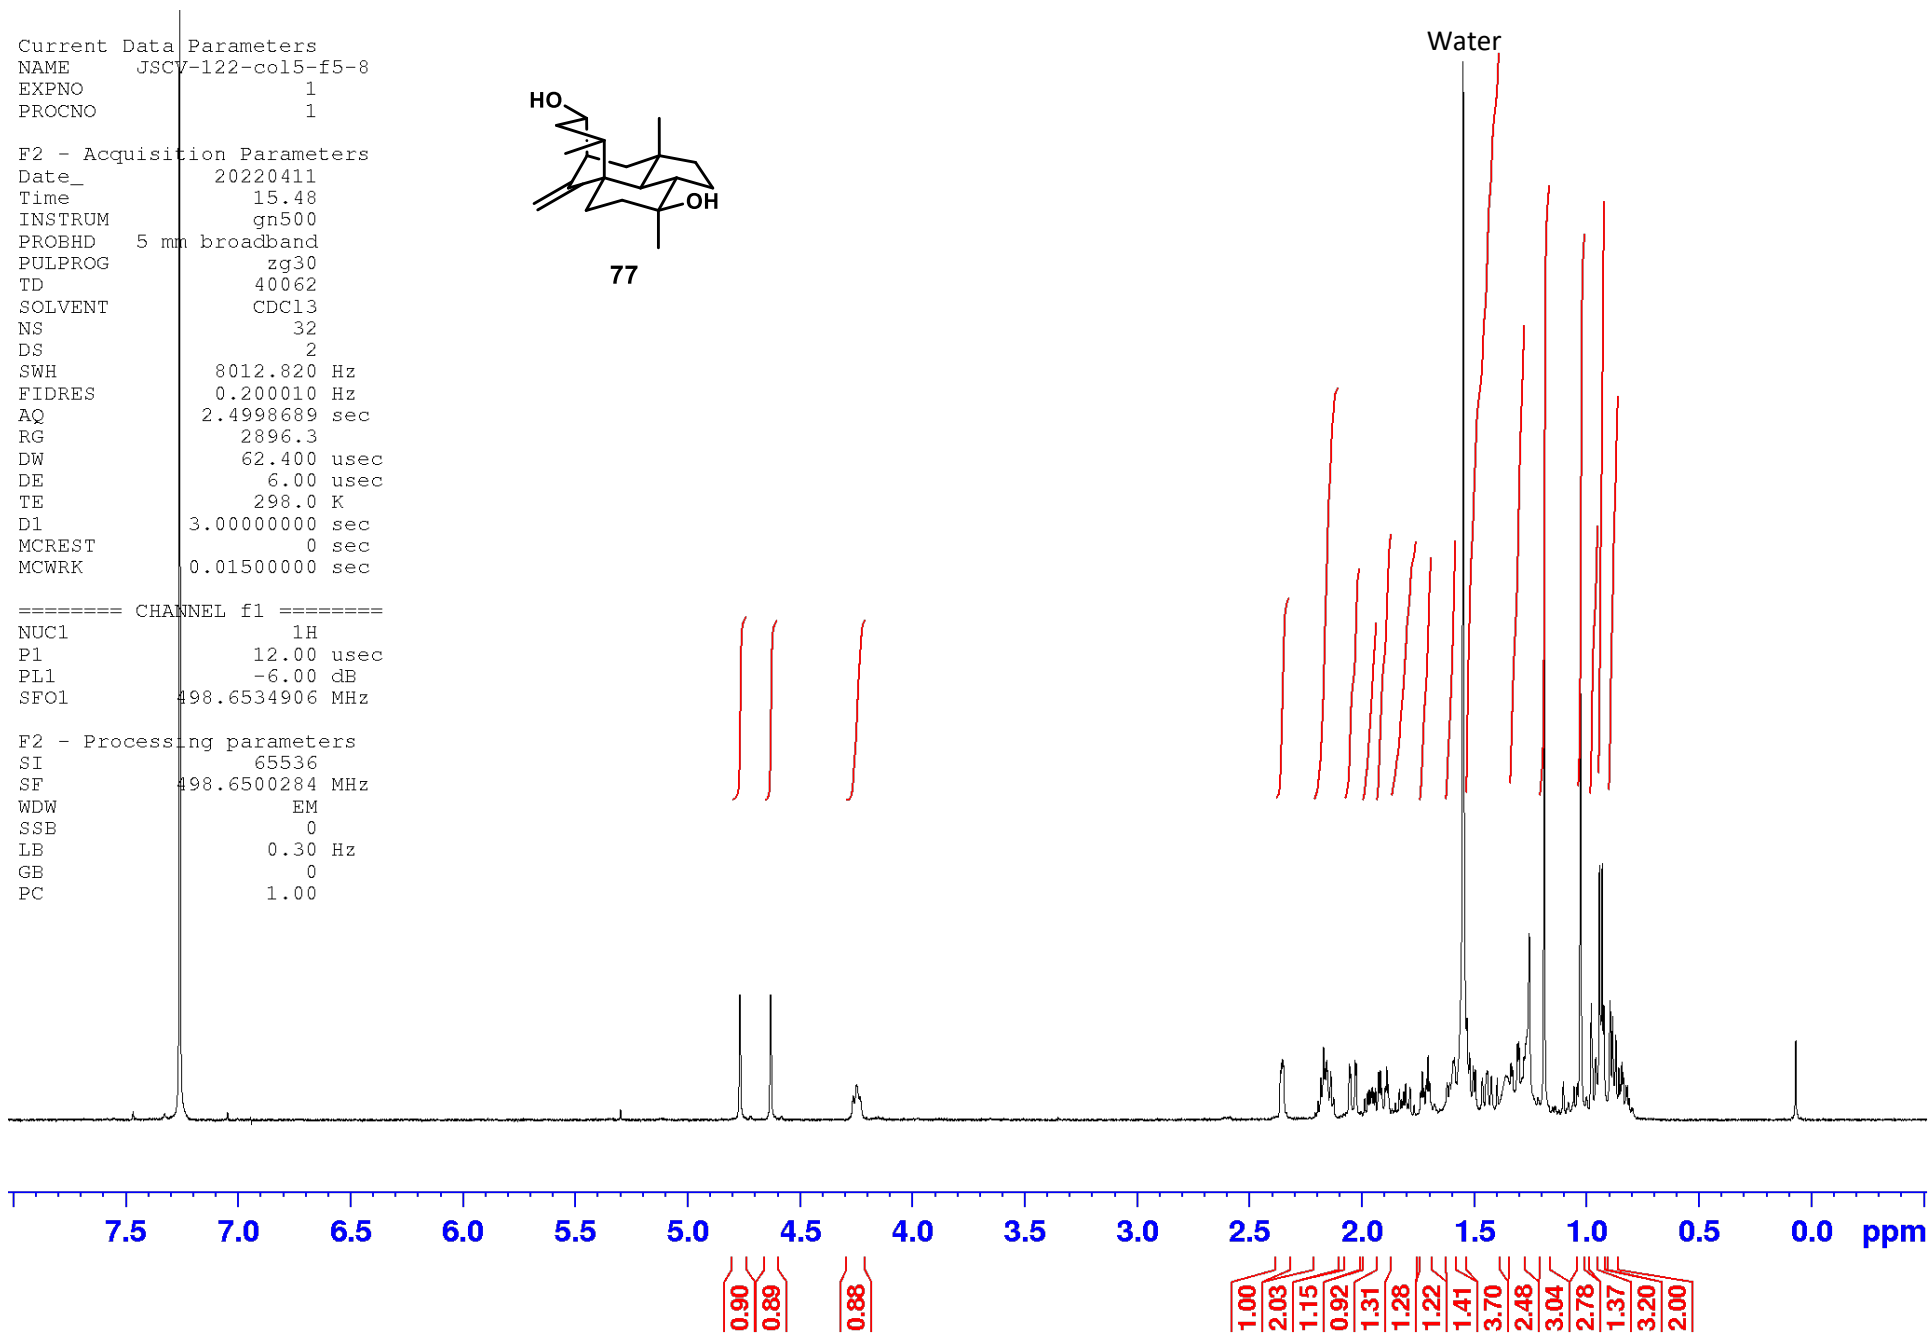

Current Data Parameters  
NAME JSCV-122-col4-f9-23  
EXPNO 2  
PROCNO 1

F2 - Acquisition Parameters  
Date\_ 20220411  
Time 11.34  
INSTRUM av600  
PROBHD 5 mm CPBBO BB-  
PULPROG zgdc30  
TD 65536  
SOLVENT CDCl3  
NS 404  
DS 4  
SWH 36231.883 Hz  
FIDRES 0.552855 Hz  
AQ 0.9043968 sec  
RG 2050  
DW 13.800 usec  
DE 19.63 usec  
TE 298.0 K  
D1 0.40000001 sec  
D11 0.03000000 sec  
TD0 1

----- CHANNEL f1 -----  
SFO1 150.9194080 MHz  
NUC1 13C  
P1 10.10 usec  
PLW1 64.00000000 W

----- CHANNEL f2 -----  
SFO2 600.1330010 MHz  
NUC2 1H  
CPDPRG[2] waltz16  
PCPD2 80.00 usec  
PLW2 30.00000000 W  
PLW12 0.37154001 W

F2 - Processing parameters  
SI 65536  
SF 150.9027937 MHz  
WDW EM  
SSB 0  
LB 1.00 Hz  
GB 0  
PC 1.00

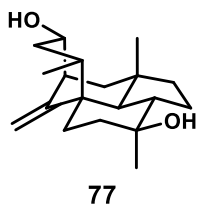

154.66

106.00

73.91  
73.43

59.48

52.09  
45.77

44.50

43.33

43.09

41.47

41.34

39.88

30.37

27.80

21.70

20.79

20.52

20.46

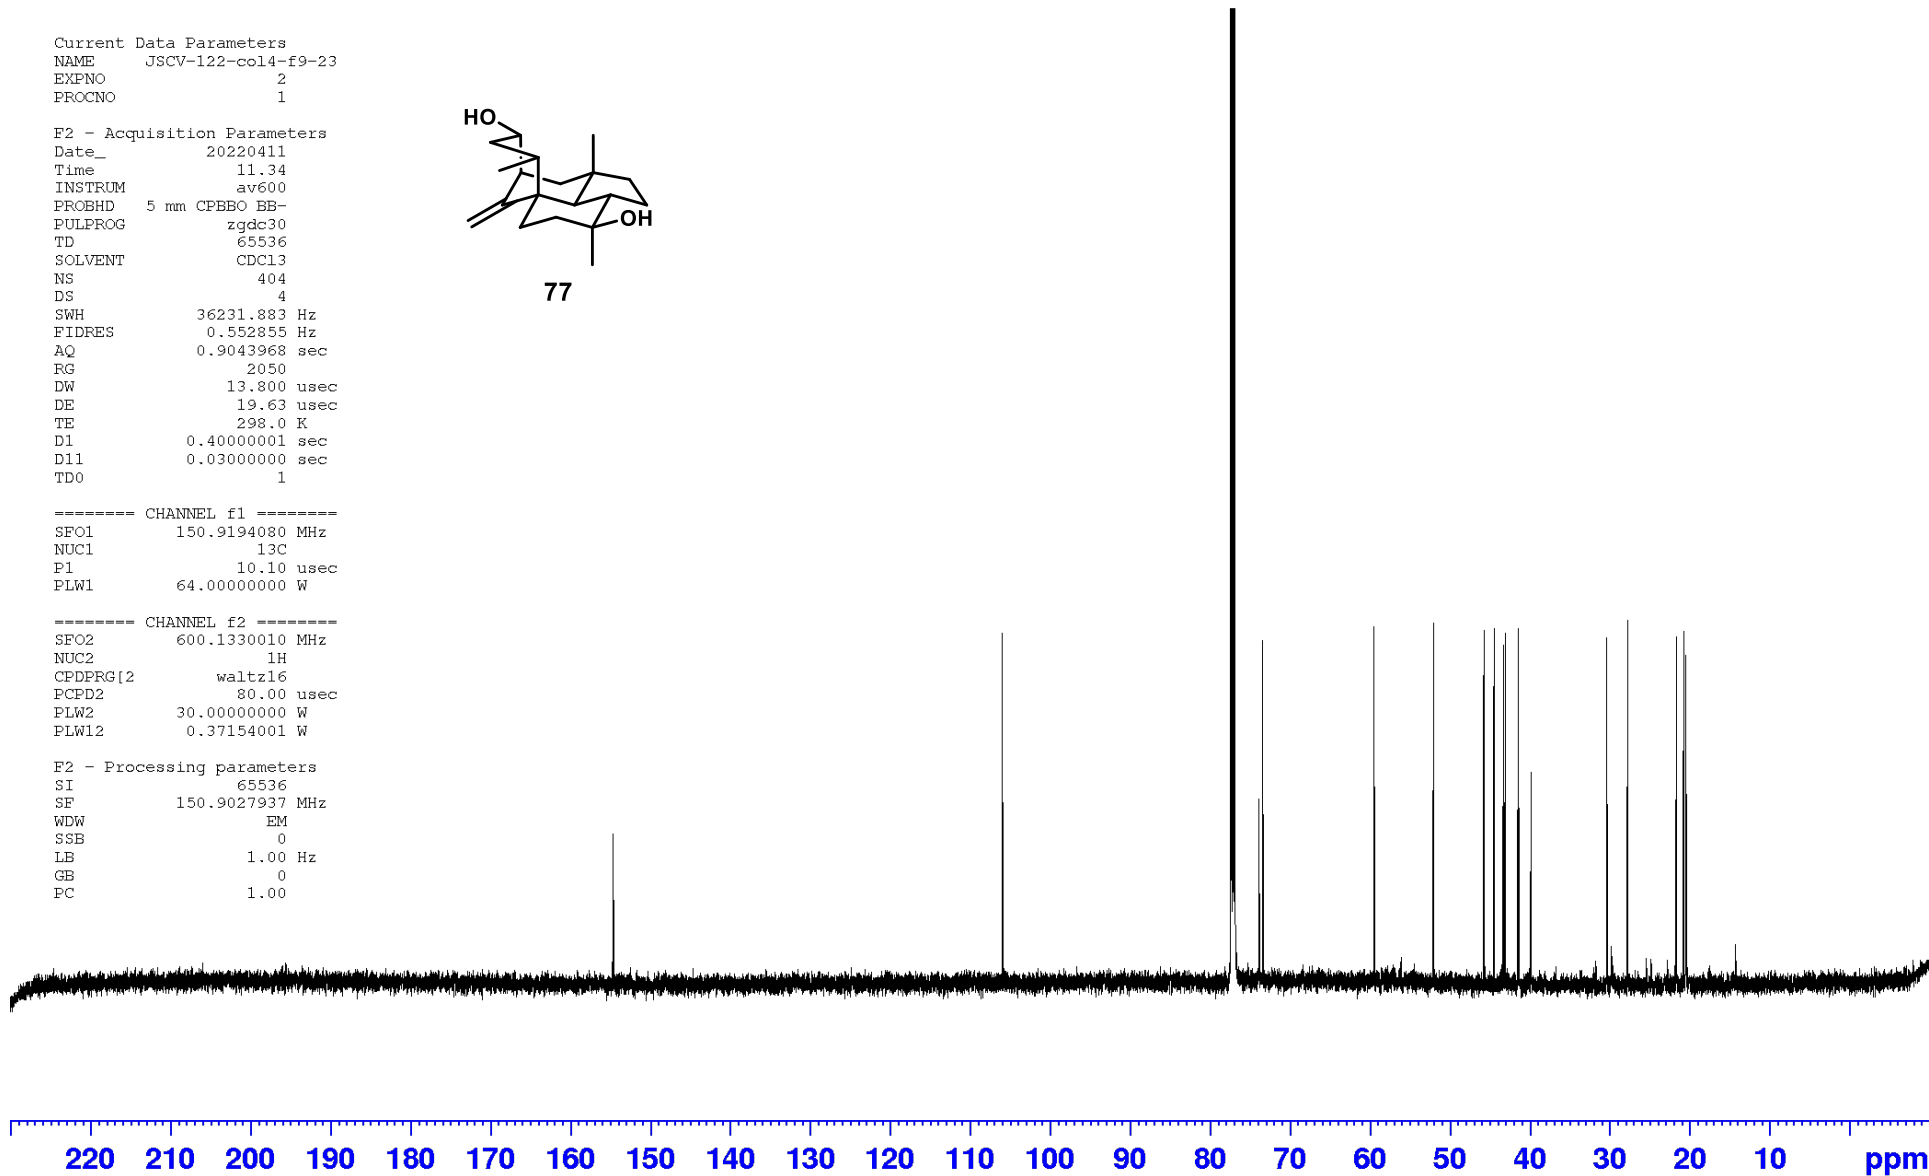

Current Data Parameters  
NAME JSCV-122-f33-45-2  
EXPNO 1  
PROCNO 1

F2 - Acquisition Parameters  
Date\_ 20220618  
Time 12.00  
INSTRUM av600  
PROBHD 5 mm CPBBO BB-  
PULPROG zg30  
TD 48074  
SOLVENT CDC13  
NS 16  
DS 2  
SWH 9615.385 Hz  
FIDRES 0.200012 Hz  
AQ 2.4998479 sec  
RG 10  
DW 52.000 usec  
DE 14.23 usec  
TE 297.9 K  
D1 4.00000000 sec  
TD0 1

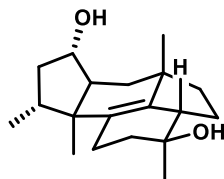

**80**, side product  
obtained in  
small quantity

==== CHANNEL f1 =====  
SFO1 600.1342009 MHz  
NUC1 1H  
P1 9.50 usec  
PLW1 30.00000000 W

F2 - Processing parameters  
SI 65536  
SF 600.1300351 MHz  
WDW EM  
SSB 0  
LB 0.10 Hz  
GB 0  
PC 1.00

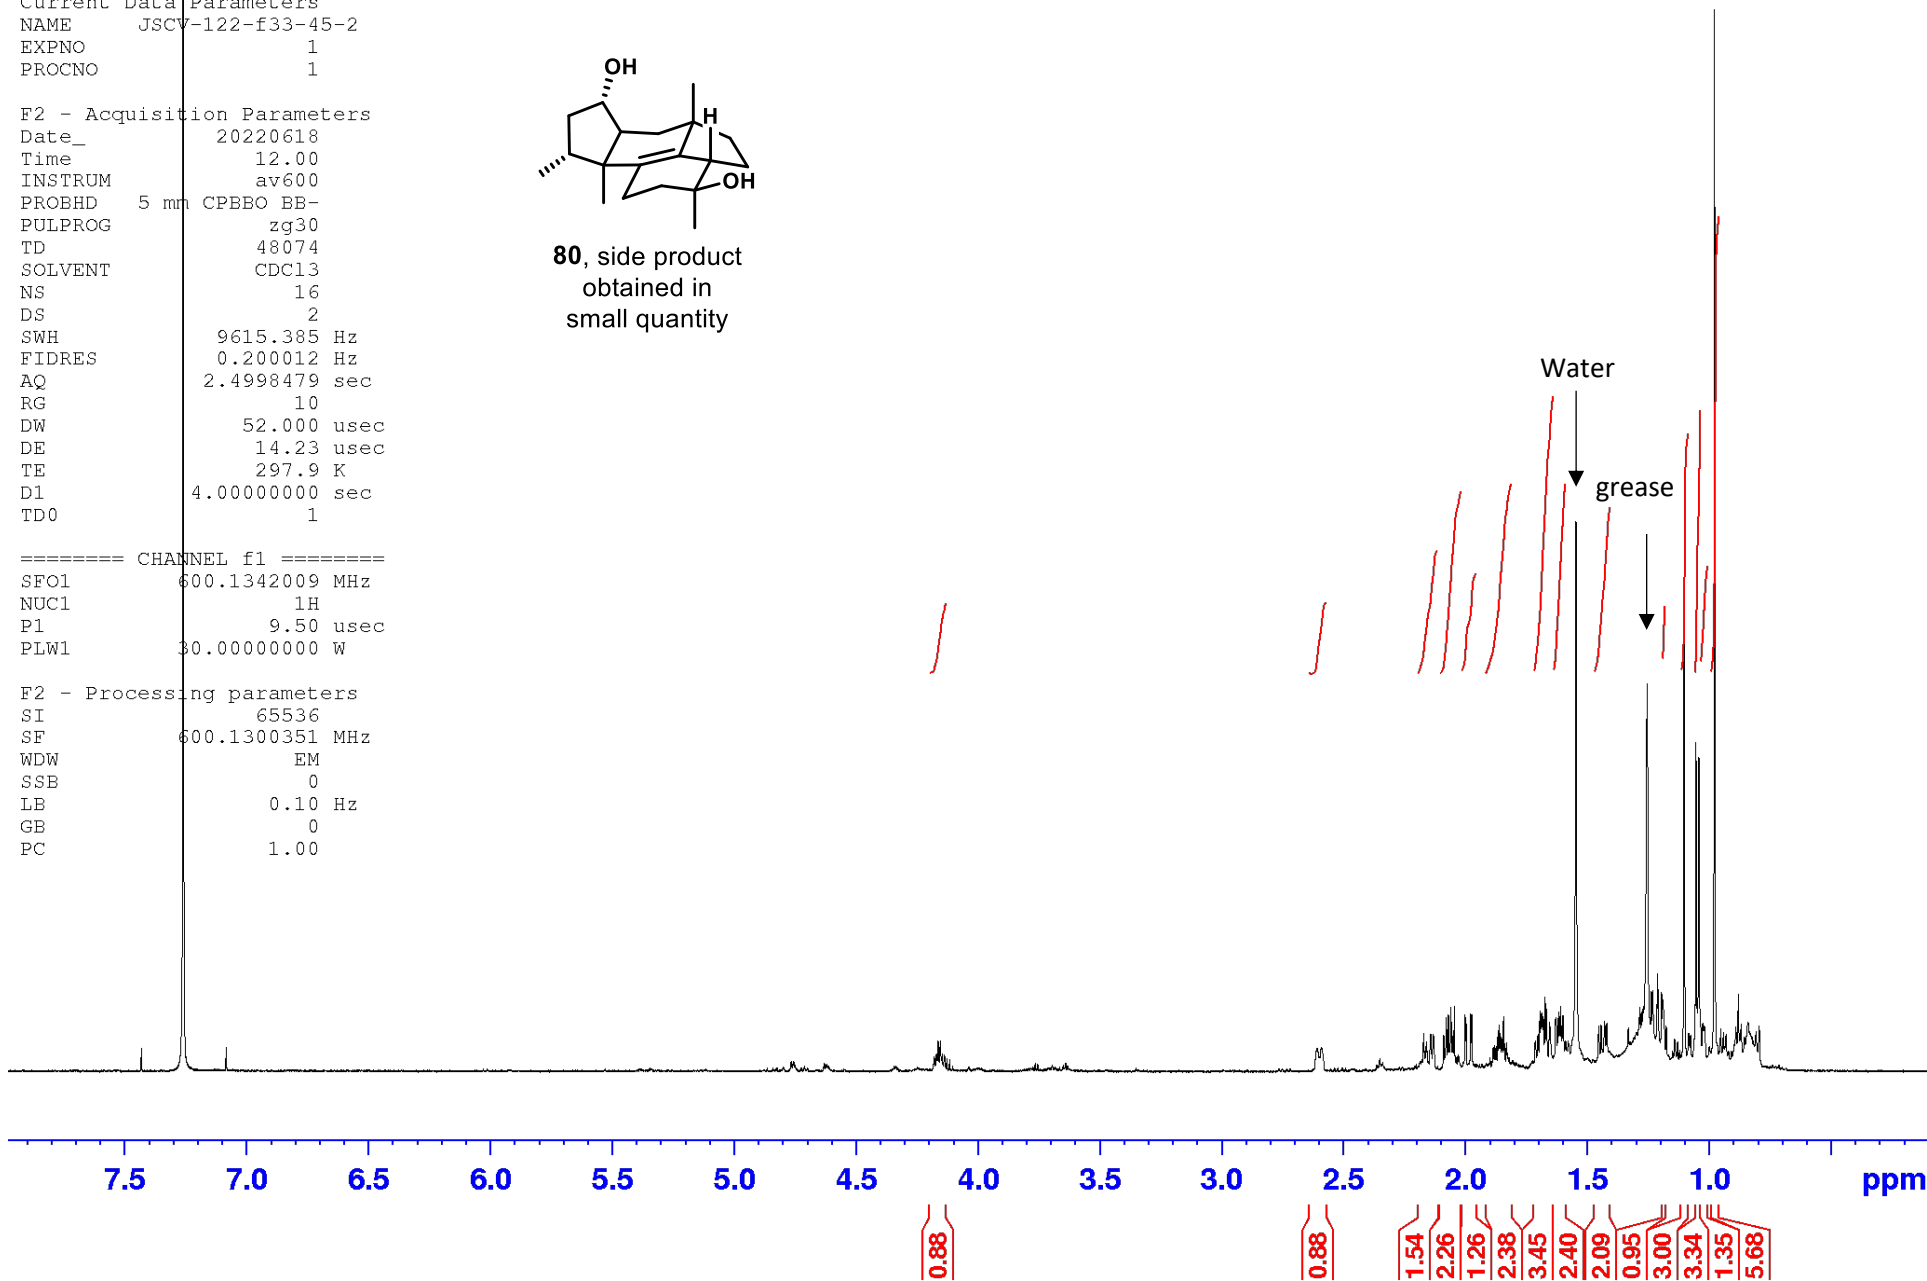

Current Data Parameters  
NAME JSCV-122-f33-45-2  
EXPNO 2  
PROCNO 1

F2 - Acquisition Parameters  
Date\_ 20220618  
Time 12.03  
INSTRUM av600  
PROBHD 5 mm CPBBO BB-  
PULPROG zgdc30  
TD 65536  
SOLVENT CDCl3  
NS 422  
DS 4  
SWH 36231.883 Hz  
FIDRES 0.552855 Hz  
AQ 0.9043968 sec  
RG 2050  
DW 13.800 usec  
DE 19.63 usec  
TE 298.0 K  
D1 0.40000001 sec  
D11 0.03000000 sec  
TD0 1

----- CHANNEL f1 -----  
SFO1 150.9194080 MHz  
NUC1 13C  
P1 10.10 usec  
PLW1 64.00000000 W

===== CHANNEL f2 =====  
SFO2 600.1330010 MHz  
NUC2 1H  
CPDPRG[2] waltz16  
PCPD2 80.00 usec  
PLW2 30.00000000 W  
PLW12 0.37154001 W

F2 - Processing parameters  
SI 65536  
SF 150.9027932 MHz  
WDW EM  
SSB 0  
LB 1.00 Hz  
GB 0  
PC 1.00

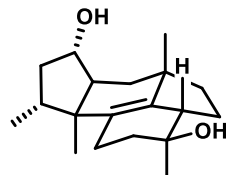

80, side product  
obtained in  
small quantity

138.18  
131.39

78.34  
72.30  
56.14  
47.89  
43.76  
43.57  
42.90  
40.56  
38.78  
38.13  
33.71  
25.84  
24.08  
22.41  
21.85  
19.53  
17.56

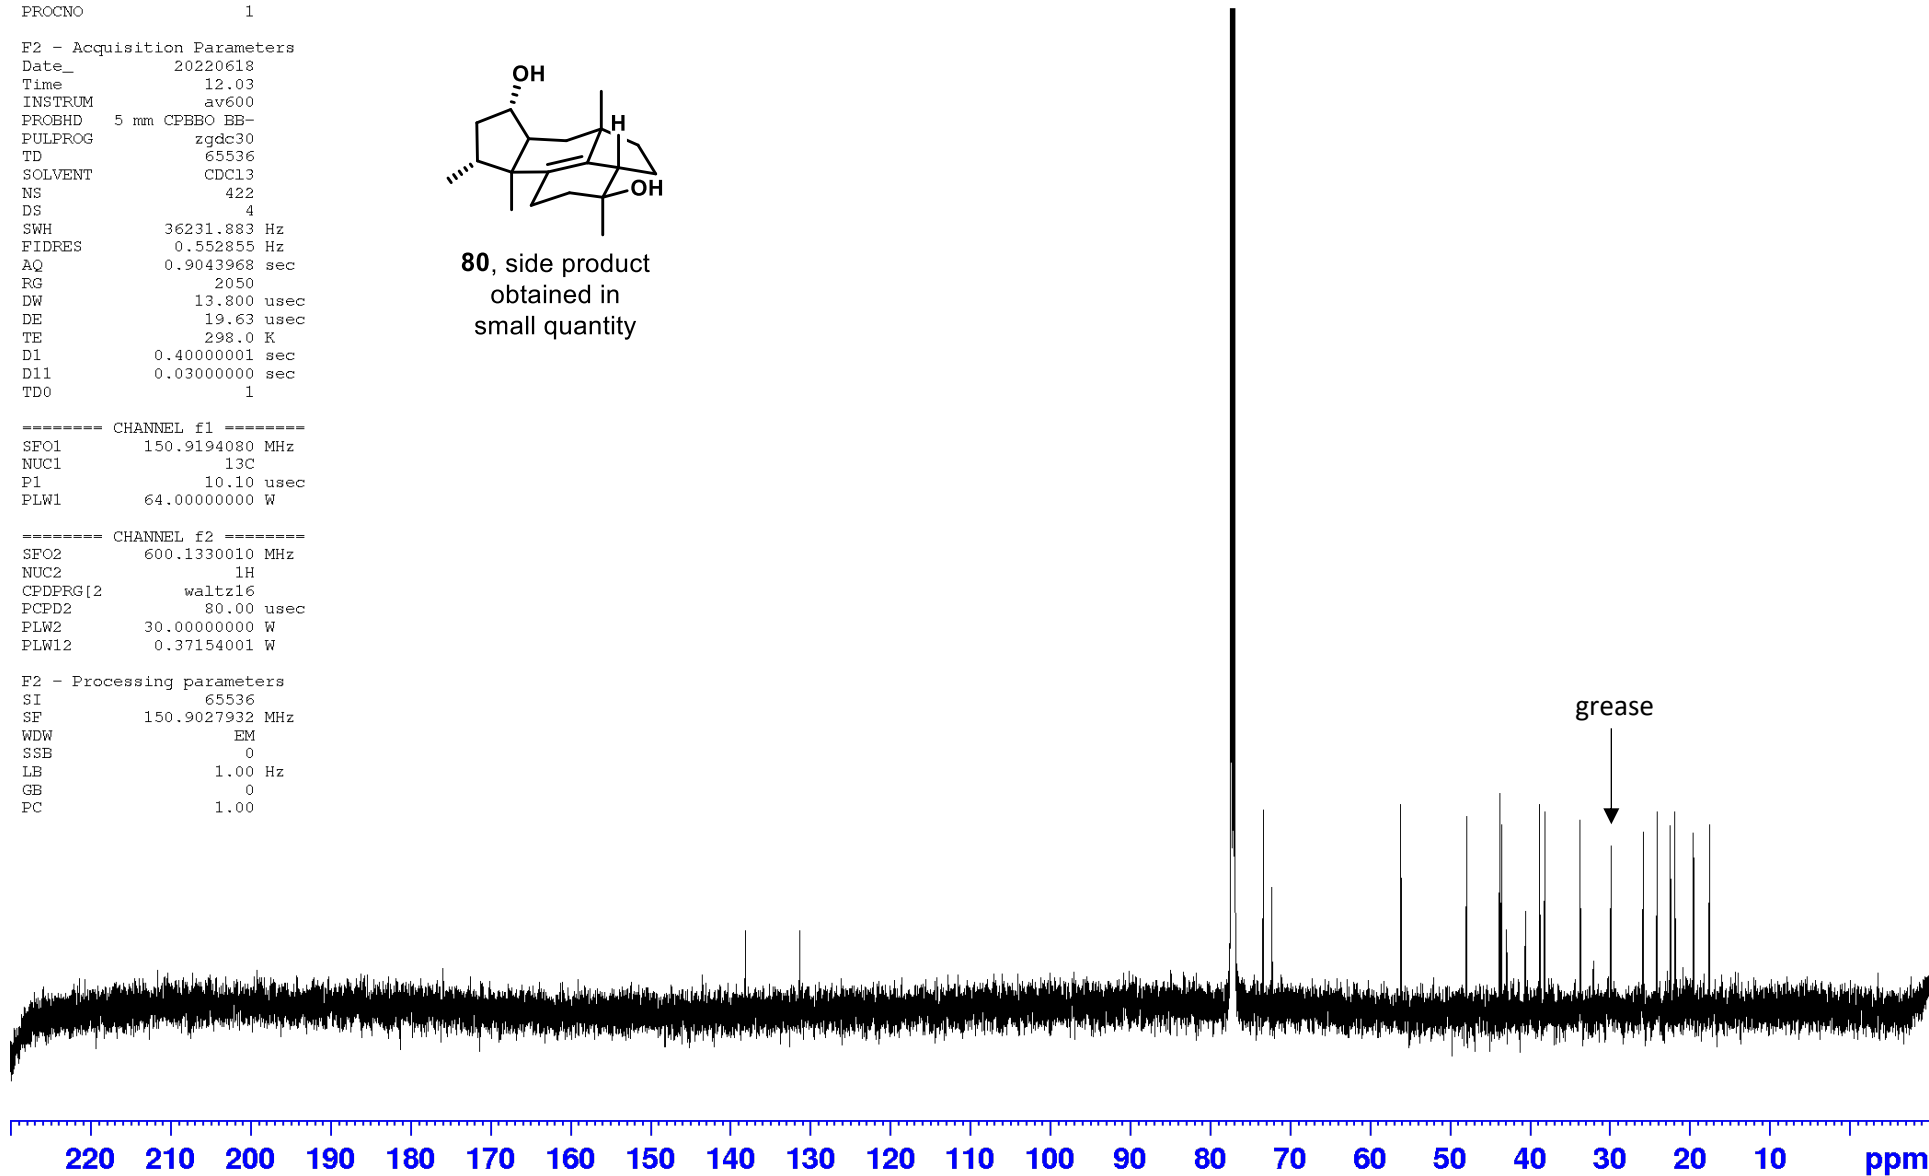

Current Data Parameters  
NAME JSCV-122-f33-45-2  
EXPNO 5  
PROCNO 1

F2 - Acquisition Parameters  
Date\_ 20220618  
Time 12.59  
INSTRUM av600  
PROBHD 5 mm CPBBO BB-  
PULPROG cosygpgf  
TD 2048  
SOLVENT CDCl3  
NS 1  
DS 16  
SWH 9615.385-Hz  
FIDRES 4.695012 Hz  
AQ 0.1064960 sec  
RG 724  
DW 52.000 usec  
DE 10.00 usec  
TE 298.0 K  
DO 0.00000300 sec  
D1 1.48689198 sec  
D13 0.00000400 sec  
D16 0.00020000 sec  
IN0 0.00010400 sec

==== CHANNEL f1 =====  
SF01 600.1342009 MHz  
NUC1 1H  
P0 9.50 usec  
P1 9.50 usec  
PLW1 30.00000000 W

===== GRADIENT CHANNEL =====  
GPNAM[1] SMSQ10.100  
GPZ1 10.00 %  
P16 1000.00 usec

F1 - Acquisition parameters  
TD 256  
SF01 600.1342 MHz  
FIDRES 75.120193 Hz  
SW 16.022 ppm  
FnMODE QF

F2 - Processing parameters  
SI 1024  
SF 600.1300345 MHz  
WDW SINE  
SSB 0  
LB 0 Hz  
GB 0  
PC 1.00

F1 - Processing parameters  
SI 1024  
MC2 QF  
SF 600.1300375 MHz  
WDW SINE  
SSB 0  
LB 0 Hz  
GB 0

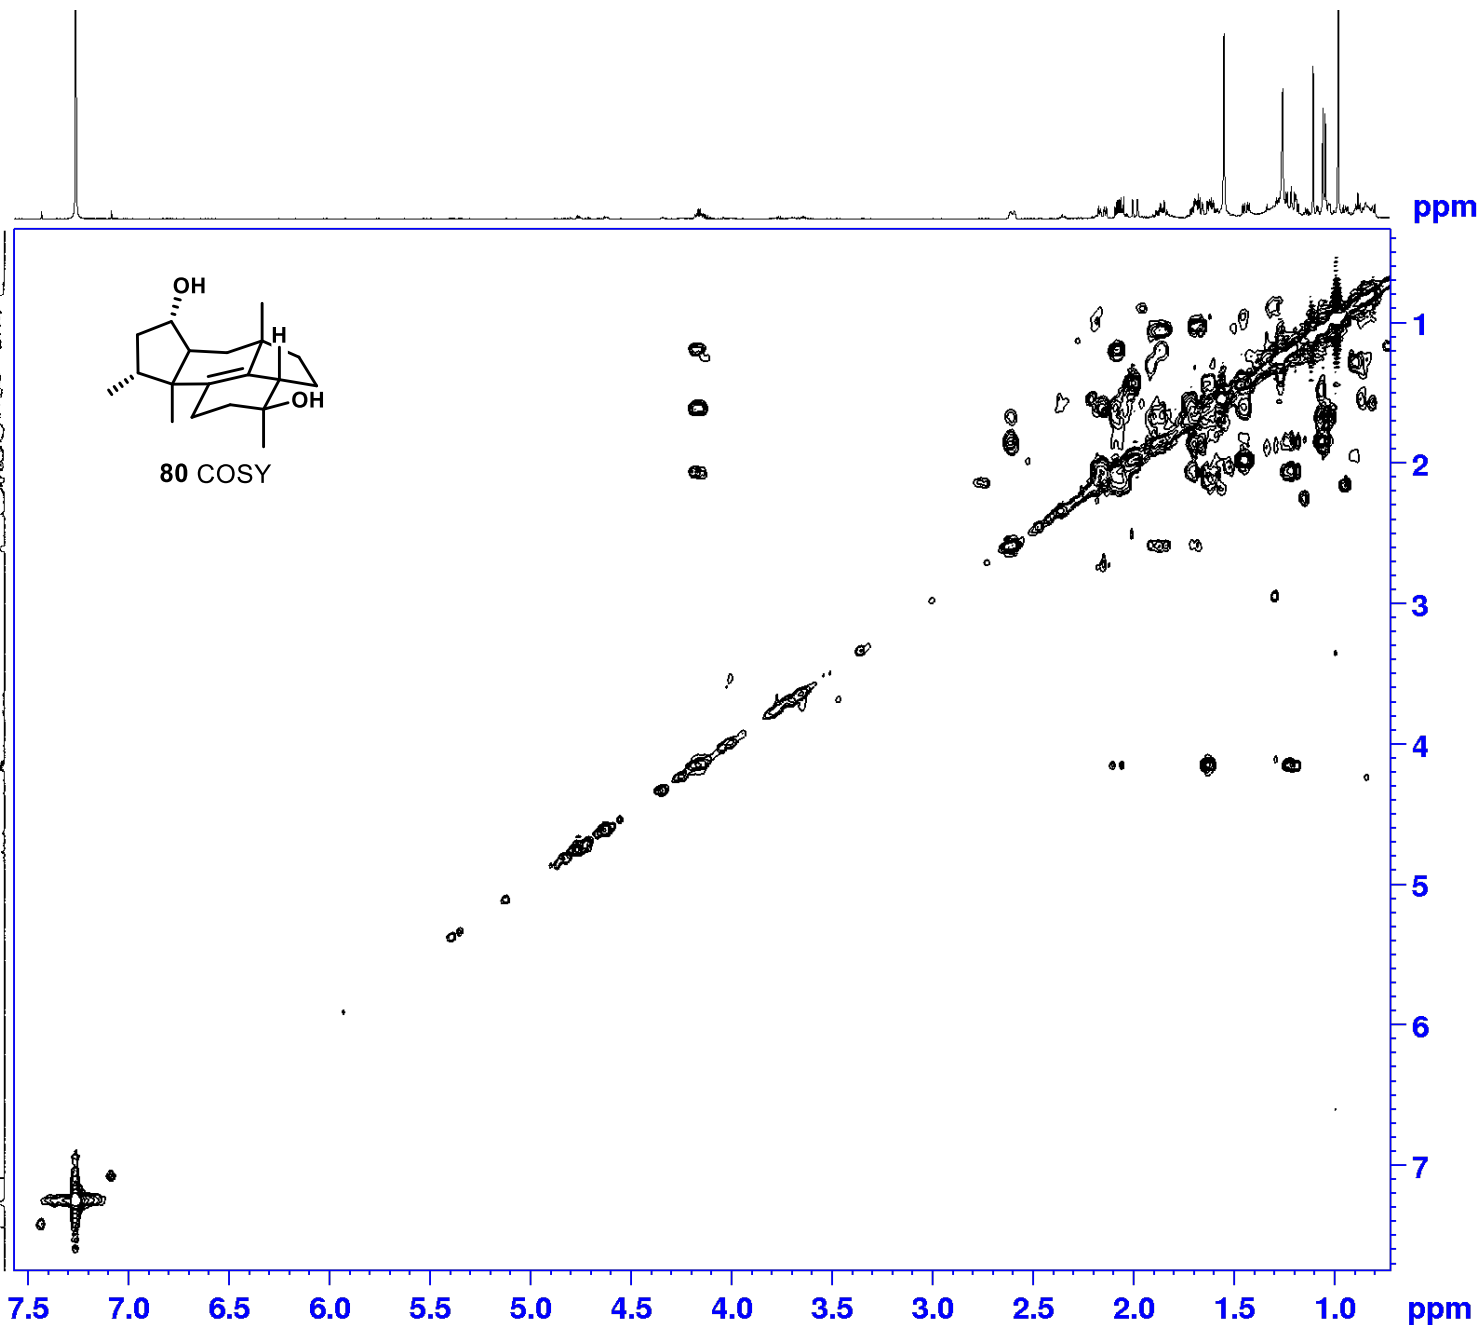

Current Data Parameters  
NAME jscv-122-f33-45-2  
EXENO 4  
PROCNO 1

F2 - Acquisition Parameters  
Date\_ 20220618  
Time 12.39  
INSTRUM av600  
PROBHD 5 mm CPBBO BB-  
FULPROG hsqcetgpgp.2  
TD 1024  
SOLVENT cdcl3  
NS 4  
DS 16  
SWH 9615.385 Hz  
FIDRES 9.390024 Hz  
AQ 0.0532480 sec  
RG 2050  
DW 52.000 usec  
DE 10.00 usec  
TE 298.0 K  
CHST2 145.0000000  
D0 0.0000300 sec  
D1 1.10000002 sec  
D4 0.00172414 sec  
D11 0.03000000 sec  
D16 0.00020000 sec  
LNO 0.00001380 sec  
ZGPGTNS

==== CHANNEL f1 =====  
SFO1 600.1342009 MHz  
NUC1 1H  
P1 10.00 usec  
P2 20.00 usec  
P28 1000.00 usec  
PLW1 30.00000000 W

==== CHANNEL f2 =====  
SFO2 150.9194083 MHz  
NUC2 13C  
CPDPRG[2] garp  
P3 10.10 usec  
P14 500.00 usec  
P24 2000.00 usec  
PCPD2 65.00 usec  
PLW0 0 W  
PLW2 64.00000000 W  
PLW12 1.47909999 W  
SPNAM[3] Ccp60,0.5,20.1  
SFOAL3 0.500  
SPOFFS3 0 Hz  
SPW3 10.00000000 W  
SPNAM[7] Ccp60comp.4  
SFOAL7 0.500  
SPOFFS7 0 Hz  
SPW7 10.00000000 W

==== GRADIENT CHANNEL =====  
GFNAM[1] SMSQ10.100  
GFNAM[2] SMSQ10.100  
GPZ1 80.00 %  
GPZ2 20.10 %  
F16 1000.00 usec

F1 - Acquisition parameters  
TD 256  
SFO1 150.9194 MHz  
FIDRES 283.061584 Hz  
SW 240.074 ppm  
EaMODE Echo-Antiecho

F2 - Processing parameters  
SI 1024  
SF 600.1300335 MHz  
WDW EM  
SSB 0  
LB 5.00 Hz  
GB 0  
PC 1.00

F1 - Processing parameters  
SI 1024  
MC2 echo-antiecho  
SF 150.9028024 MHz  
WDW QSINE  
SSB 3  
LB 0 Hz  
GB 0

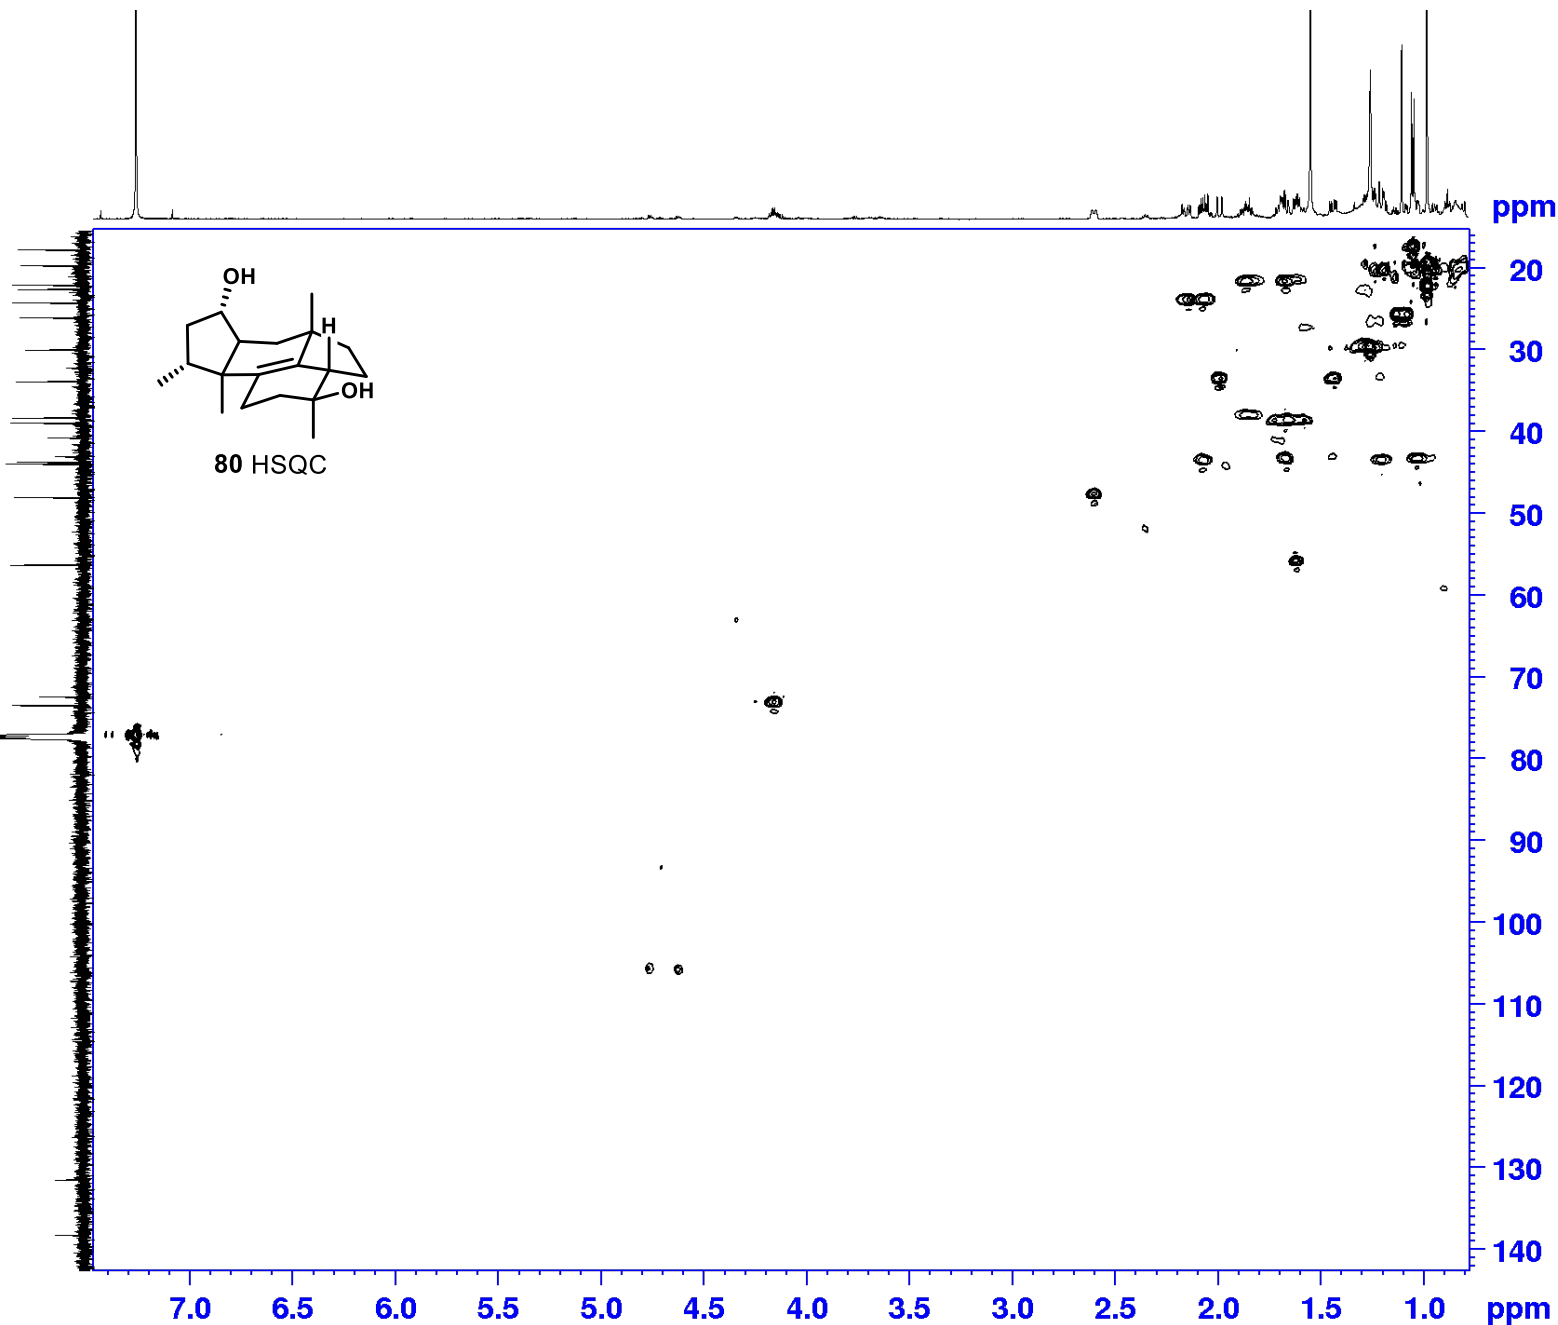



Current Data Parameters  
NAME JSCV-122-f33-45-2  
EXPNO 6  
PROCNO 1

F2 - Acquisition Parameters  
Date\_ 20220618  
Time 13.07  
INSTRUM av600  
PROBHD 5 mm CPBBO BB-  
PULPROG hmbcgp1pdqf  
TD 4096  
SOLVENT CDCl3  
NS 4  
DS 16  
SWH 9615.385 Hz  
FIDRES 2.347506 Hz  
AQ 0.2129920 sec  
RG 2050  
DW 52.000 usec  
DE 10.00 usec  
TE 298.0 K  
CNST2 145.0000000  
CNST13 10.0000000  
D0 0.00000300 sec  
D1 1.10000002 sec  
D2 0.00344828 sec  
D6 0.05000000 sec  
D16 0.00020000 sec  
IN0 0.00001380 sec

----- CHANNEL f1 -----  
SFO1 600.1342009 MHz  
NUC1 1H  
P1 9.50 usec  
P2 19.00 usec  
PLW1 30.00000000 W

----- CHANNEL f2 -----  
SFO2 150.9194083 MHz  
NUC2 13C  
P3 10.10 usec  
PLW2 64.00000000 W

----- GRADIENT CHANNEL -----  
GPNAM[1] SMSQ10.100  
GPNAM[2] SMSQ10.100  
GPNAM[3] SMSQ10.100  
GPZ1 50.00 %  
GPZ2 30.00 %  
GPZ3 40.10 %  
P16 1000.00 usec

F1 - Acquisition parameters  
TD 256  
SFO1 150.9194 MHz  
FIDRES 283.061584 Hz  
SW 240.074 ppm  
EnMODE QF

F2 - Processing parameters  
SI 2048  
SF 600.1300382 MHz  
WDW SINE  
SSB 0  
LB 0 Hz  
GB 0  
PC 1.00

F1 - Processing parameters  
SI 1024  
MC2 QF  
SF 150.9028242 MHz  
WDW SINE  
SSB 0  
LB 0 Hz  
GB 0

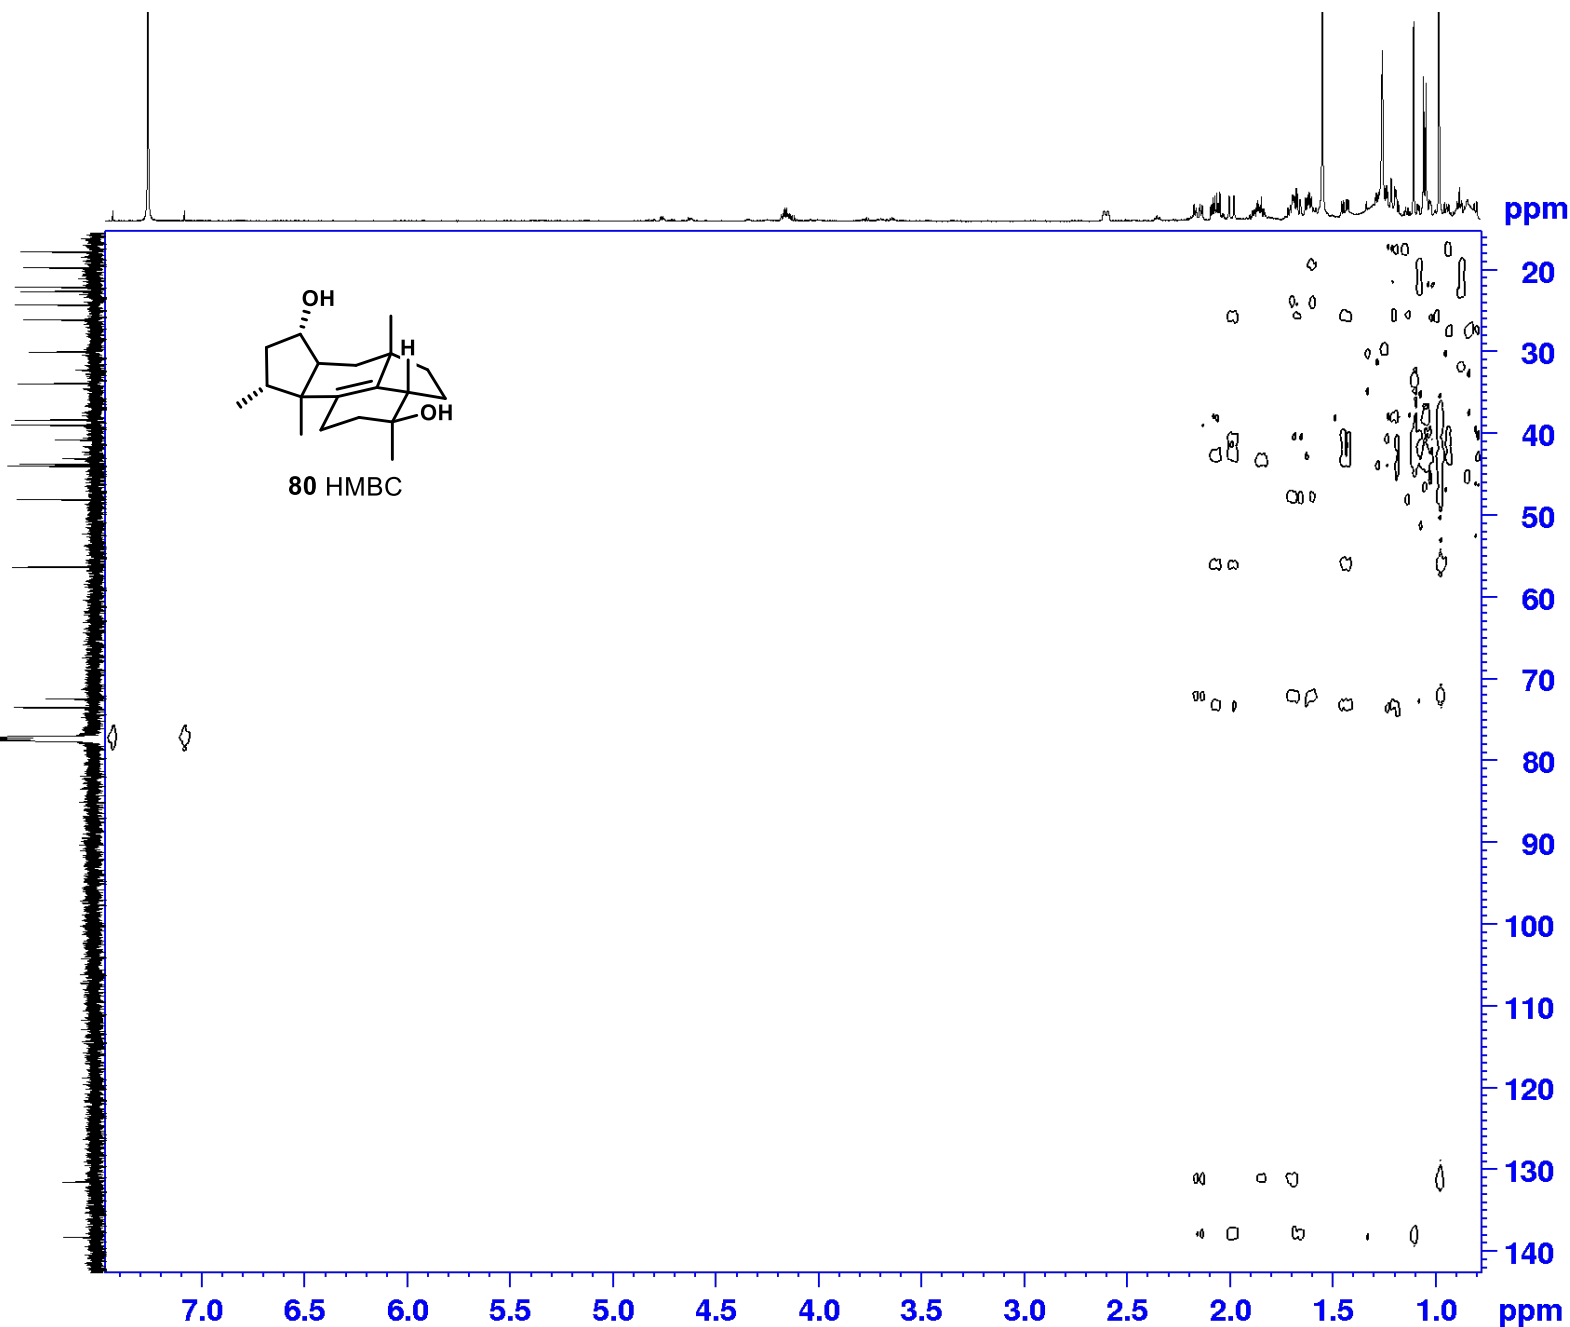

Current Data Parameters  
NAME JSCV-122-f33-45-2  
EXPNO 7  
PROCNO 1

F2 - Acquisition Parameters  
Date\_ 20220618  
Time 13.32  
INSTRUM av600  
PROBHD 5 mm CPBBO BB-  
PULPROG noesygpqh  
TD 2048  
SOLVENT CDCl3  
NS 2  
DS 16  
SWH 9615.385 Hz  
FIDRES 4.695012 Hz  
AQ 0.1064960 sec  
RG 101  
DW 52.000 usec  
DE 16.68 usec  
TE 297.9 K  
DO 0.00003990 sec  
D1 2.00000000 sec  
D8 1.00000000 sec  
D16 0.00020000 sec  
IN0 0.00010400 sec

==== CHANNEL f1 =====  
SFO1 600.1342009 MHz  
NUC1 1H  
P1 9.50 usec  
P2 19.00 usec  
PLW1 30.00000000 W

===== GRADIENT CHANNEL =====  
GPNAM[1] SMSQ10.100  
GPZ1 40.00 %  
P16 1000.00 usec

F1 - Acquisition parameters  
TD 256  
SFO1 600.1342 MHz  
FIDRES 75.120193 Hz  
SW 16.022 ppm  
FnMODE States-TPPI

F2 - Processing parameters  
SI 1024  
SF 600.1300407 MHz  
WDW QSINE  
SSB 2  
LB 0 Hz  
GB 0  
PC 1.00

F1 - Processing parameters  
SI 1024  
MC2 States-TPPI  
SF 600.1300319 MHz  
WDW QSINE  
SSB 2  
LB 0 Hz  
GB 0

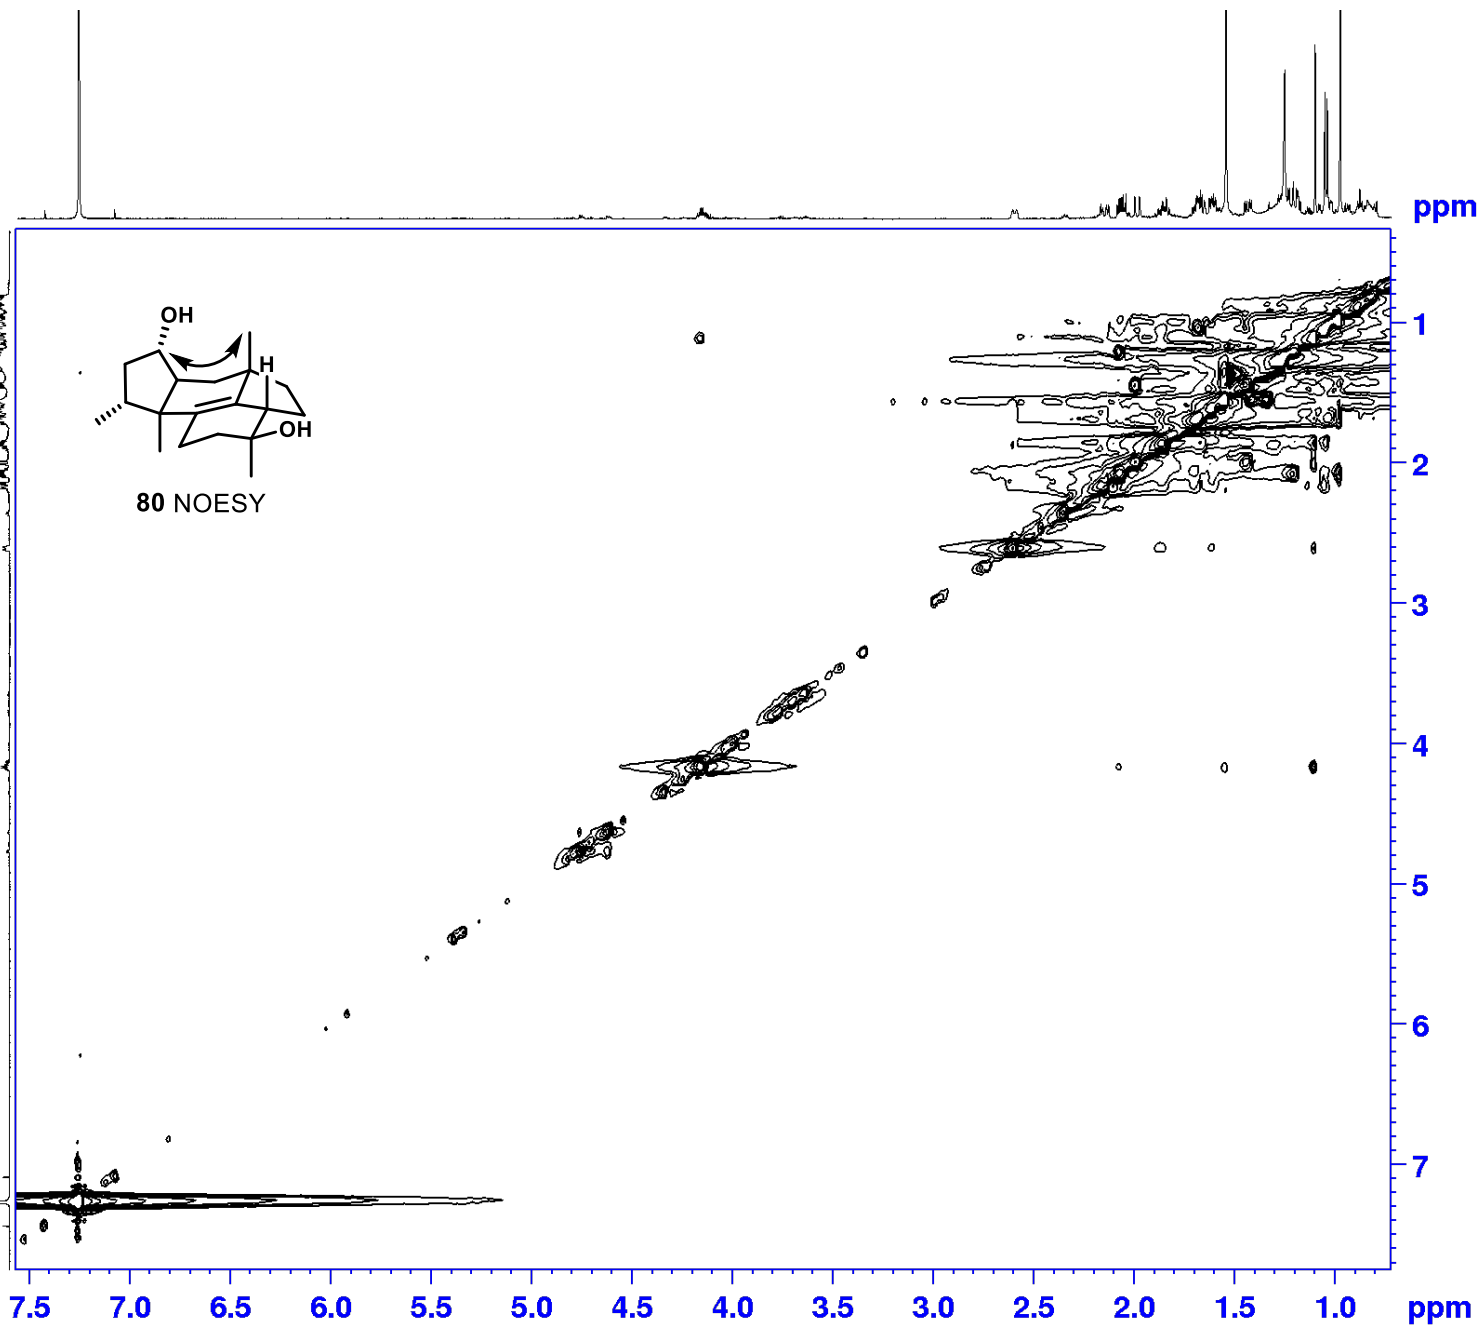

Current Data Parameters  
NAME JSCV-146-coll-f30-34  
EXPNO 1  
PROCNO 1

F2 - Acquisition Parameters  
Date\_ 20220520  
Time 18.30  
INSTRUM cryo500  
PROBHD 5 mm CPTCI 1H-  
PULPROG zg30  
TD 40062  
SOLVENT CDCl3  
NS 14  
DS 2  
SWH 8012.820 Hz  
FIDRES 0.200010 Hz  
AQ 2.4998689 sec  
RG 6.3  
DW 62.400 usec  
DE 6.00 usec  
TE 298.0 K  
D1 4.00000000 sec  
MCREST 0 sec  
MCWRK 0.01500000 sec

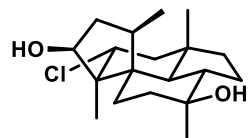

**81**, side product  
obtained in  
small quantity

==== CHANNEL f1 =====  
NUC1 1H  
P1 9.75 usec  
PL1 1.60 dB  
SFO1 500.2235015 MHz

F2 - Processing parameters  
SI 65536  
SF 500.2200317 MHz  
WDW EM  
SSB 0  
LB 0.30 Hz  
GB 0  
PC 1.00

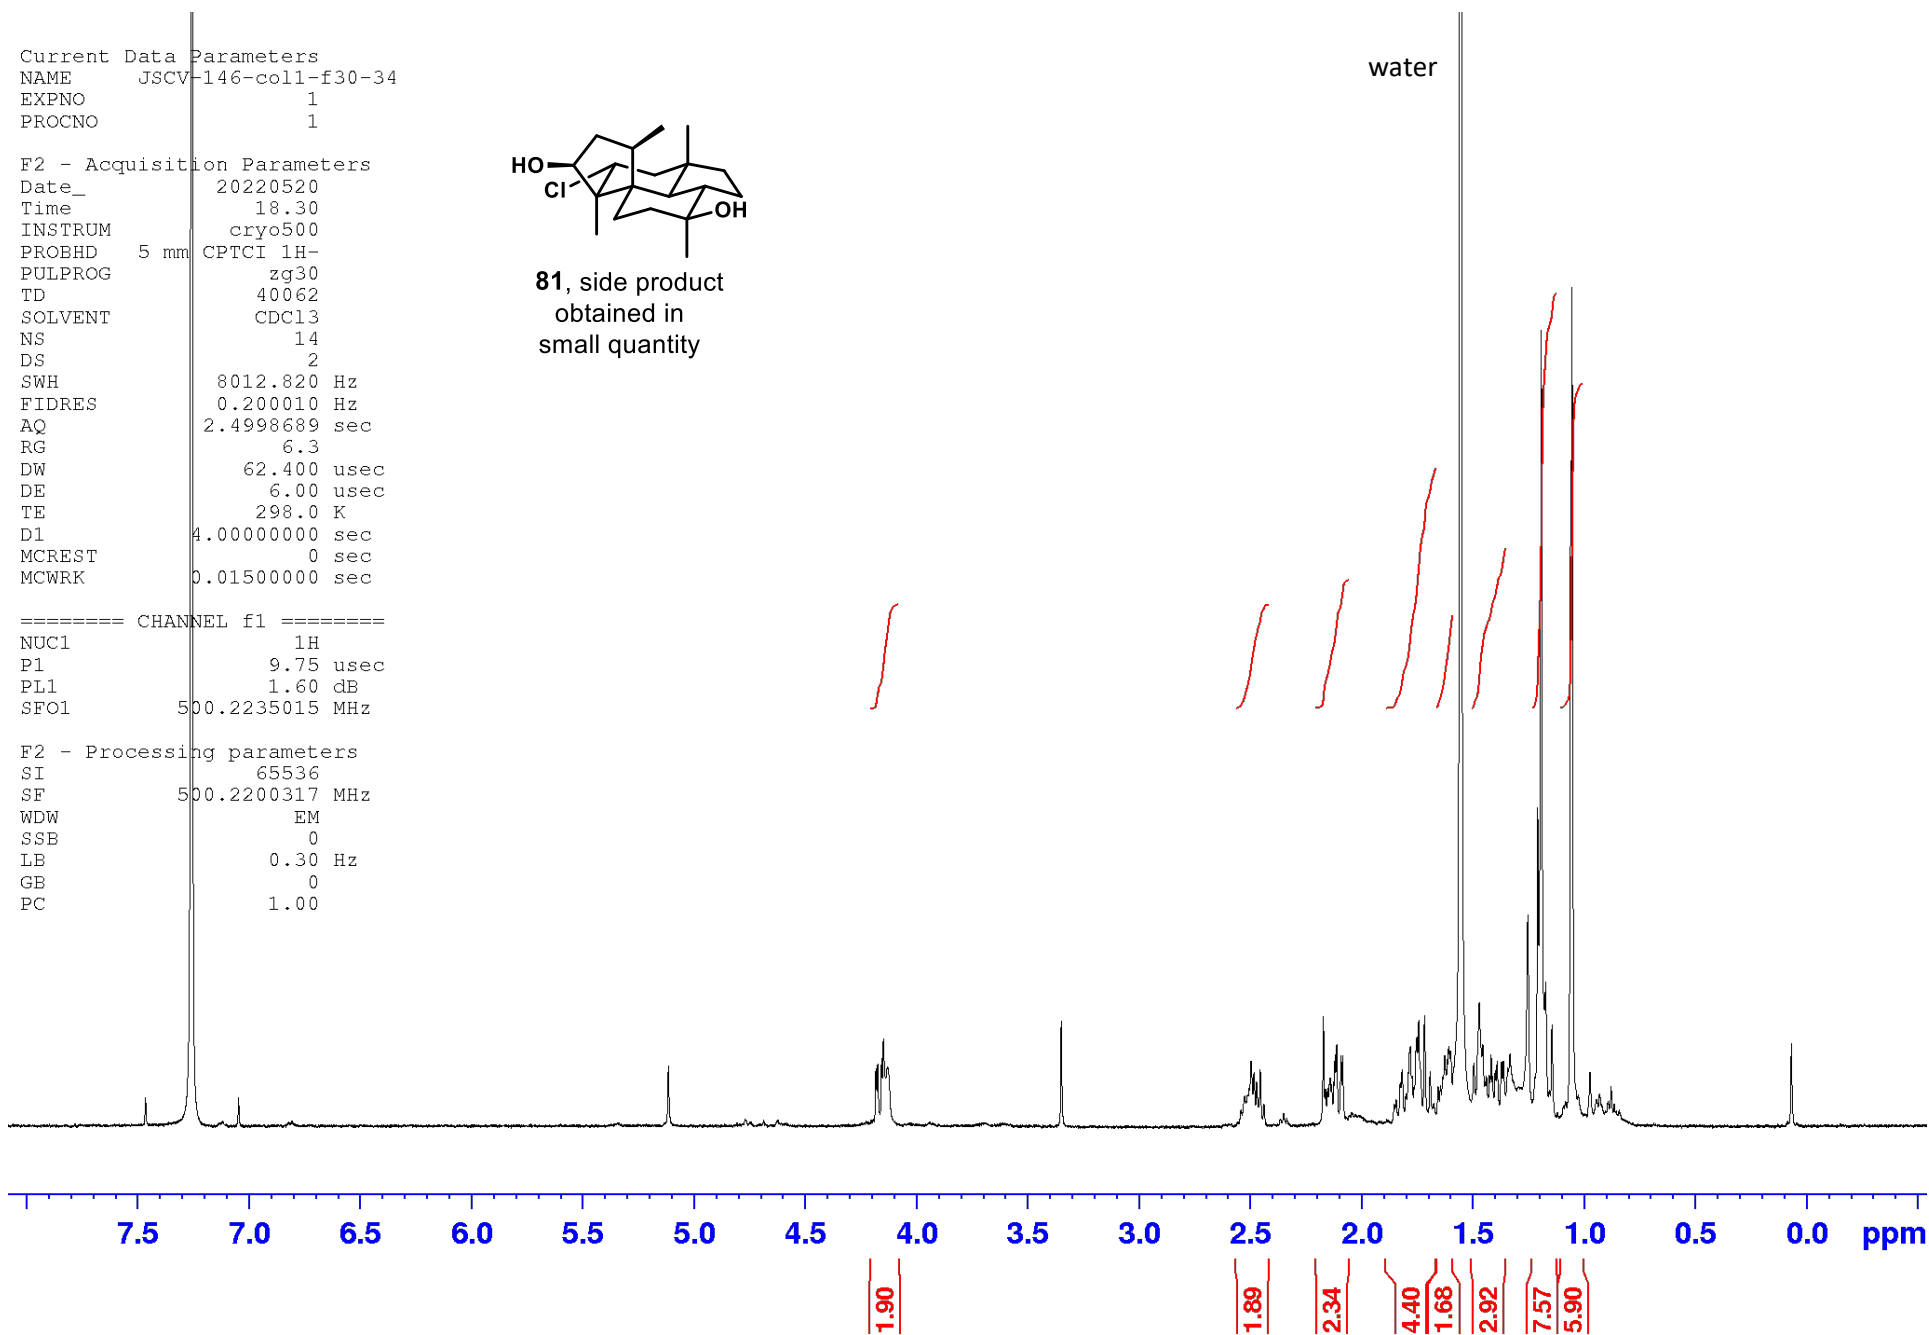

Current Data Parameters  
NAME JSCV-146-f27-39-2  
EXPNO 2  
PROCNO 1

F2 - Acquisition Parameters  
Date\_ 20220617  
Time 18.24  
INSTRUM av600  
PROBHD 5 mm CPBBO BB-  
PULPROG zgdc30  
TD 65536  
SOLVENT CDC13  
NS 367  
DS 4  
SWH 36231.883 Hz  
FIDRES 0.552855 Hz  
AQ 0.9043968 sec  
RG 2050  
DW 13.800 usec  
DE 19.63 usec  
TE 298.0 K  
D1 0.40000001 sec  
D11 0.03000000 sec  
TD0 1

----- CHANNEL f1 -----  
SFO1 150.9194080 MHz  
NUC1 13C  
P1 10.10 usec  
PLW1 64.00000000 W

----- CHANNEL f2 -----  
SFO2 600.1330010 MHz  
NUC2 1H  
CPDPRG[2] waltz16  
PCPD2 80.00 usec  
PLW2 30.00000000 W  
PLW12 0.37154001 W

F2 - Processing parameters  
SI 65536  
SF 150.9027931 MHz  
WDW EM  
SSB 0  
LB 1.00 Hz  
GB 0  
PC 1.00

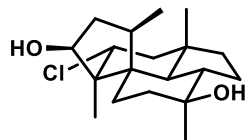

81, side product  
obtained in  
small quantity

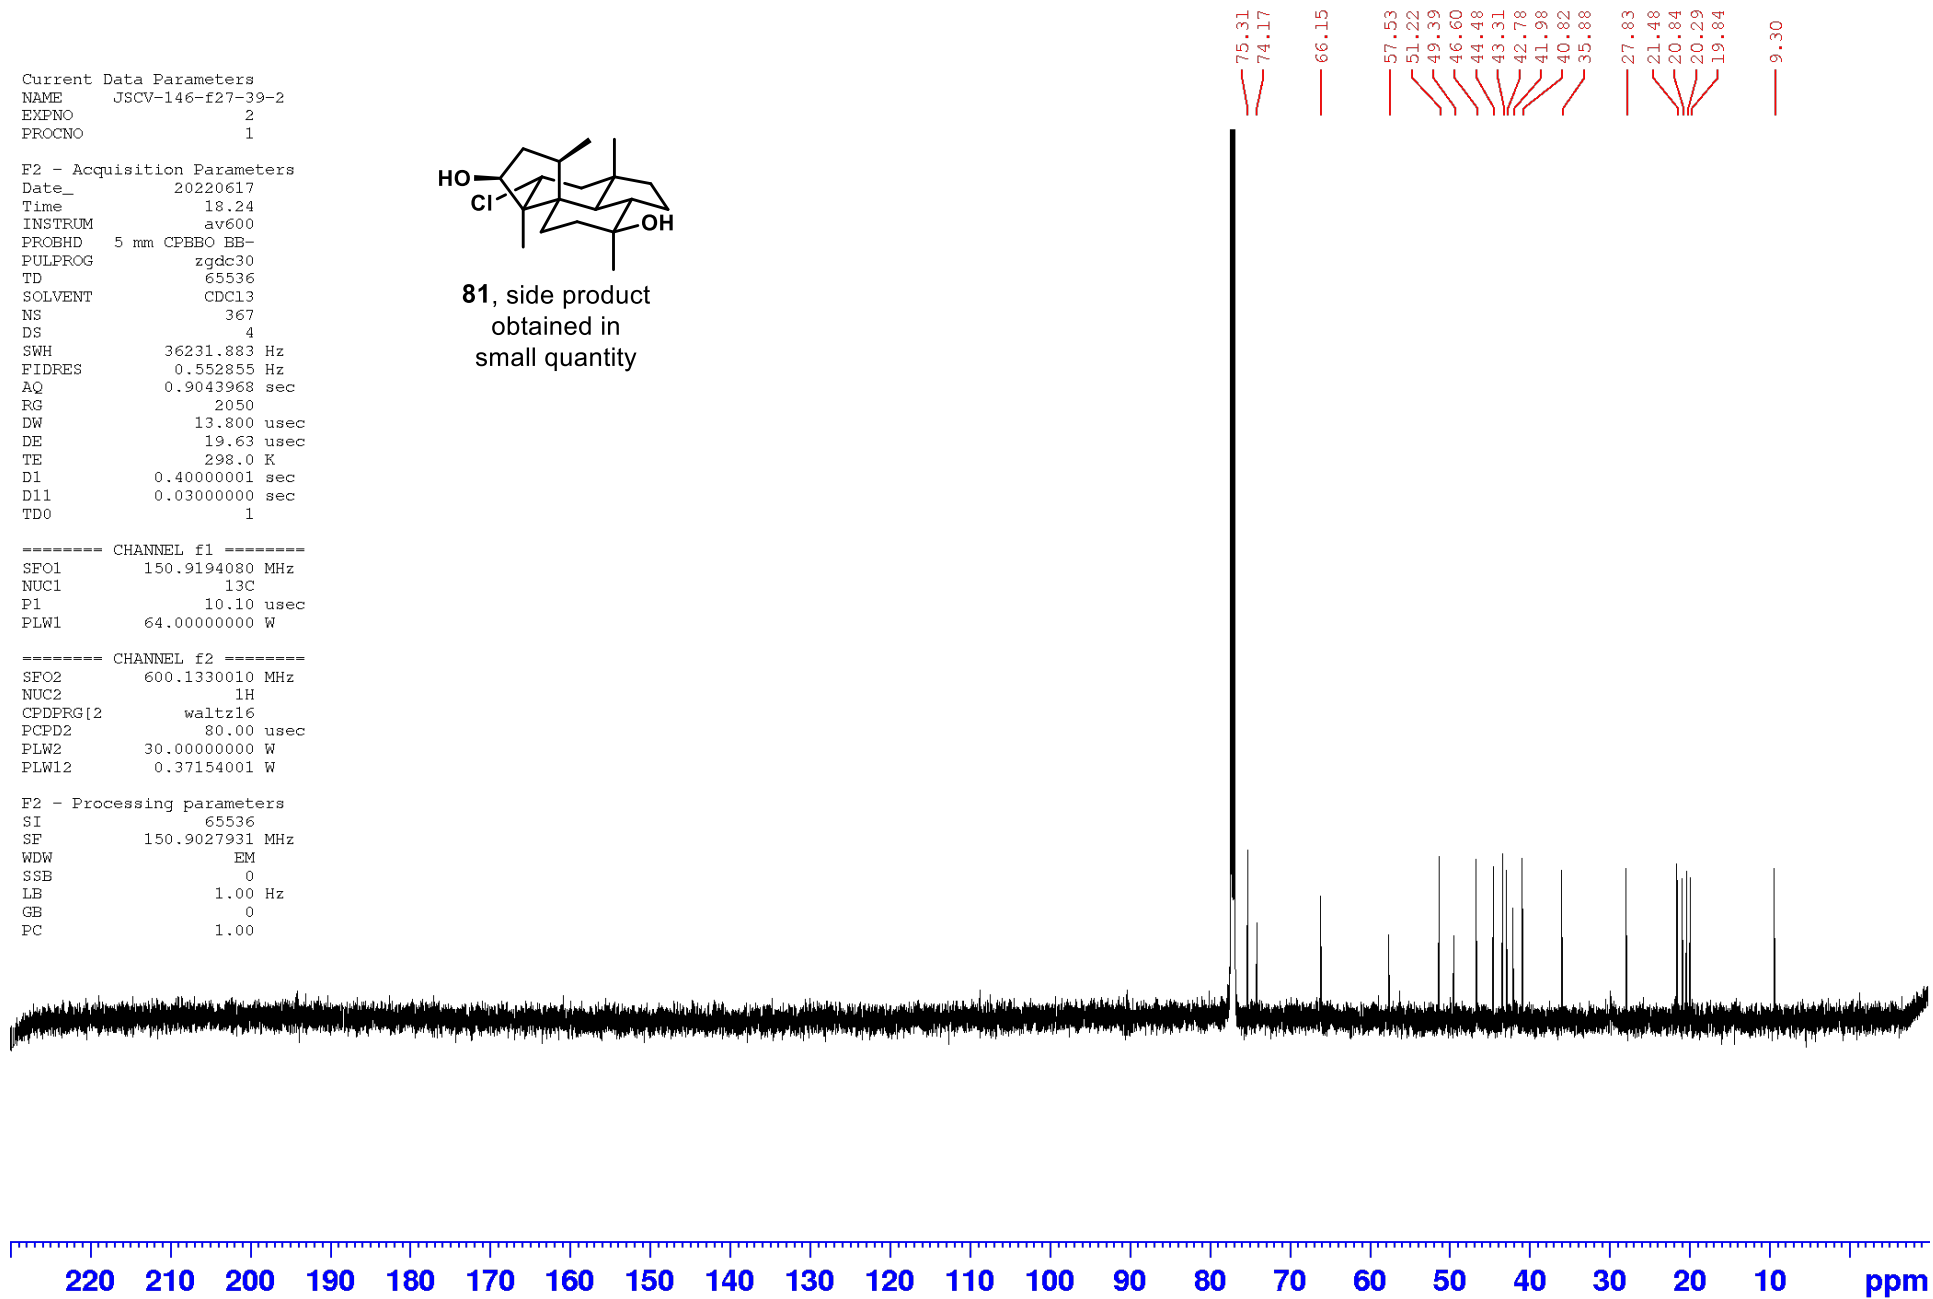

Current Data Parameters  
NAME JSCV-146-f27-39-2  
EXPNO 5  
PROCNO 1

F2 - Acquisition Parameters  
Date\_ 20220617  
Time 19.11  
INSTRUM av600  
PROBHD 5 mm CPBBO BB-  
PULPROG cosygpgf  
TD 2048  
SOLVENT CDCl3  
NS 1  
DS 16  
SWH 9615.385 Hz  
FIDRES 4.695012 Hz  
AQ 0.1064960 sec  
RG 724  
DW 52.000 usec  
DE 10.00 usec  
TE 297.9 K  
DO 0.00000300 sec  
D1 1.48689198 sec  
D13 0.00000400 sec  
D16 0.00020000 sec  
IN0 0.00010400 sec

==== CHANNEL f1 =====  
SF01 600.1342009 MHz  
NUC1 1H  
P0 9.50 usec  
P1 9.50 usec  
PLW1 30.00000000 W

===== GRADIENT CHANNEL =====  
GPNAM[1] SMSQ10.100  
GPZ1 10.00 %  
P16 1000.00 usec

F1 - Acquisition parameters  
TD 256  
SF01 600.1342 MHz  
FIDRES 75.120193 Hz  
SW 16.022 ppm  
FnMODE QF

F2 - Processing parameters  
SI 1024  
SF 600.1300349 MHz  
WDW SINE  
SSB 0  
LB 0 Hz  
GB 0  
PC 1.00

F1 - Processing parameters  
SI 1024  
MC2 QF  
SF 600.1300326 MHz  
WDW SINE  
SSB 0  
LB 0 Hz  
GB 0

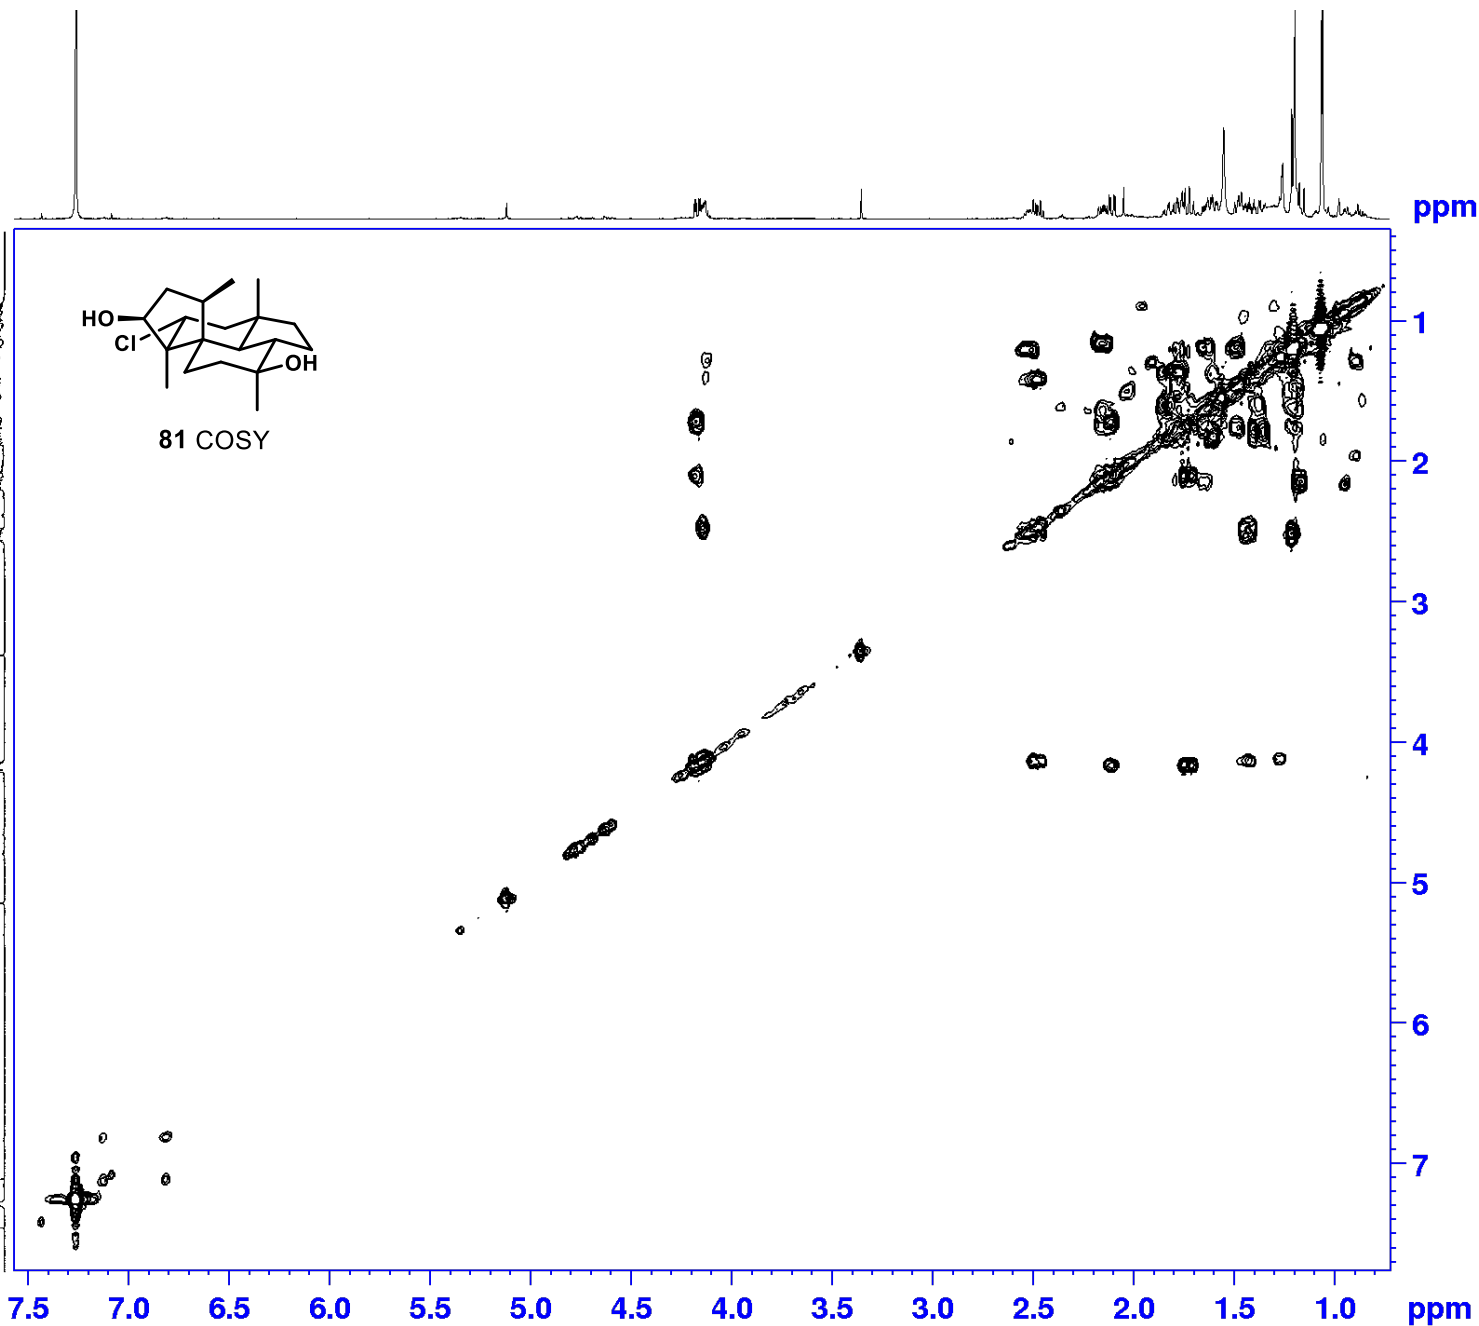

Current Data Parameters  
NAME JSCV-146-f27-39-2  
EXPNO 4  
PROCNO 1

F2 - Acquisition Parameters  
Date\_ 20220617  
Time 19.00  
INSTRUM av600  
PROBHD 5 mm CPEBO BB-  
PULPROG hsqcetgppr.2  
TD 1024  
SOLVENT cdcl3  
NS 2  
DS 16  
SWH 9615.385 Hz  
FIDRES 9.390024 Hz  
AQ 0.0532480 sec  
RG 912  
DW 52.000 usec  
DE 10.00 usec  
TE 297.9 K  
CNST2 145.0000000  
DD 0.0000300 sec  
D1 1.1000002 sec  
D4 0.00172414 sec  
D11 0.0300000 sec  
D16 0.0002000 sec  
IN0 0.00001380 sec  
ZOOPTNS

===== CHANNEL f1 =====  
SF01 600.1342009 MHz  
NUC1 1H  
P1 10.00 usec  
P2 20.00 usec  
P28 1000.00 usec  
PLW1 30.0000000 W

===== CHANNEL f2 =====  
SF02 150.9194083 MHz  
NUC2 13C  
CPDPRG2 gexp  
P3 10.10 usec  
P14 500.00 usec  
P24 2000.00 usec  
PCPD2 65.00 usec  
PLW0 0 W  
PLW2 64.0000000 W  
PLW12 1.47909999 W  
SFOAL3 Crp60,0.5,20.1  
SFOAL3 0.500  
SFOFFS3 0 Hz  
SPW3 10.0000000 W  
SFOAL7 Crp60comp,4  
SFOAL7 0.500  
SFOFFS7 0 Hz  
SPW7 10.0000000 W

===== GRADIENT CHANNEL =====  
GPNAM[1] SMSQ10.100  
GPNAM[2] SMSQ10.100  
GPZ1 80.00 %  
GPZ2 20.10 %  
F16 1000.00 usec

F1 - Acquisition parameters  
TD 256  
SF01 150.9194 MHz  
FIDRES 283.061584 Hz  
SW 240.074 ppm  
FaMODE Echo-Antiecho

F2 - Processing parameters  
SI 1024  
SF 600.1300354 MHz  
WDW EM  
SSB 0  
LB 5.00 Hz  
GB 0  
FC 1.00

F1 - Processing parameters  
SI 1024  
MC2 echo-antiecho  
SF 150.9028014 MHz  
WDW QSINE  
SSB 3  
LB 0 Hz  
GB 0

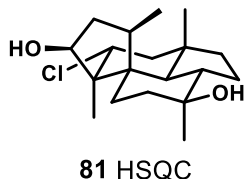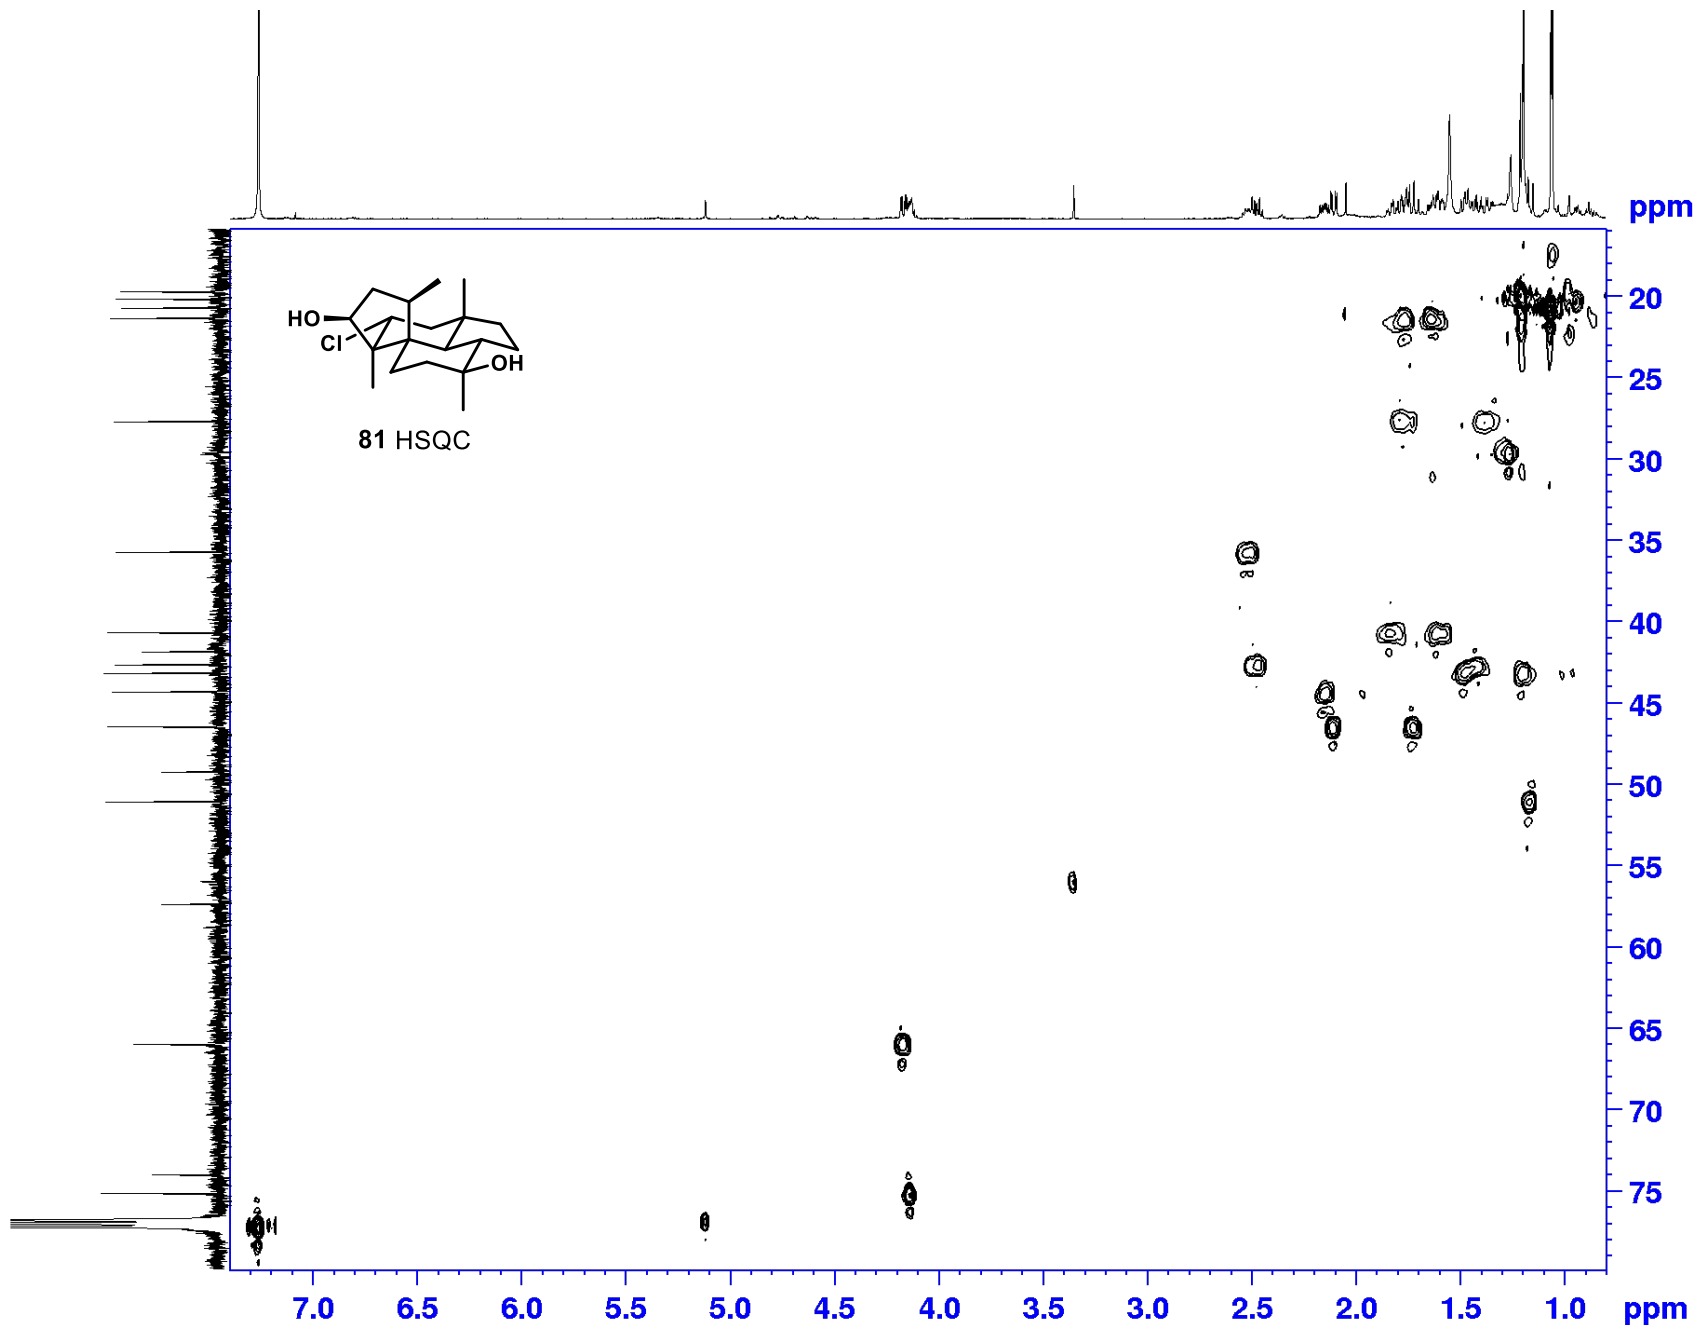

Current Data Parameters  
NAME J8CV-146-f27-39-2  
EXPNO 6  
PROCNO 1

F2 - Acquisition Parameters  
Date\_ 20220617  
Time 19.18  
INSTRUM av600  
PROBHD 5 mm CPBBO BB-  
PULPROG hmbcgp1pndg1  
TD 4096  
SOLVENT CDCl3  
NS 2  
DS 16  
SWH 9615.385 Hz  
FIDRES 2.347506 Hz  
AQ 0.2129920 sec  
RG 2050  
DW 52.000 usec  
DE 10.00 usec  
TE 297.9 K  
CNST2 145.0000000  
CNST13 10.0000000  
D0 0.00000300 sec  
D1 1.10000002 sec  
D2 0.00344828 sec  
D6 0.05000000 sec  
D16 0.00020000 sec  
IN0 0.00001380 sec

----- CHANNEL f1 -----  
SFO1 600.1342009 MHz  
NUC1 1H  
P1 9.50 usec  
P2 19.00 usec  
PLW1 30.00000000 W

----- CHANNEL f2 -----  
SFO2 150.9194083 MHz  
NUC2 13C  
P3 10.10 usec  
PLW2 64.00000000 W

----- GRADIENT CHANNEL -----  
GPNAM[1] SMSQ10.100  
GPNAM[2] SMSQ10.100  
GPNAM[3] SMSQ10.100  
GPZ1 50.00 %  
GPZ2 30.00 %  
GPZ3 40.10 %  
P16 1000.00 usec

F1 - Acquisition parameters  
TD 256  
SFO1 150.9194 MHz  
FIDRES 283.061584 Hz  
SW 240.074 ppm  
FnMODE QF

F2 - Processing parameters  
SI 2048  
SF 600.1300327 MHz  
WDW SINE  
SSB 0  
LB 0 Hz  
GB 0  
PC 1.00

F1 - Processing parameters  
SI 1024  
MC2 QF  
SF 150.9028234 MHz  
WDW SINE  
SSB 0  
LB 0 Hz  
GB 0

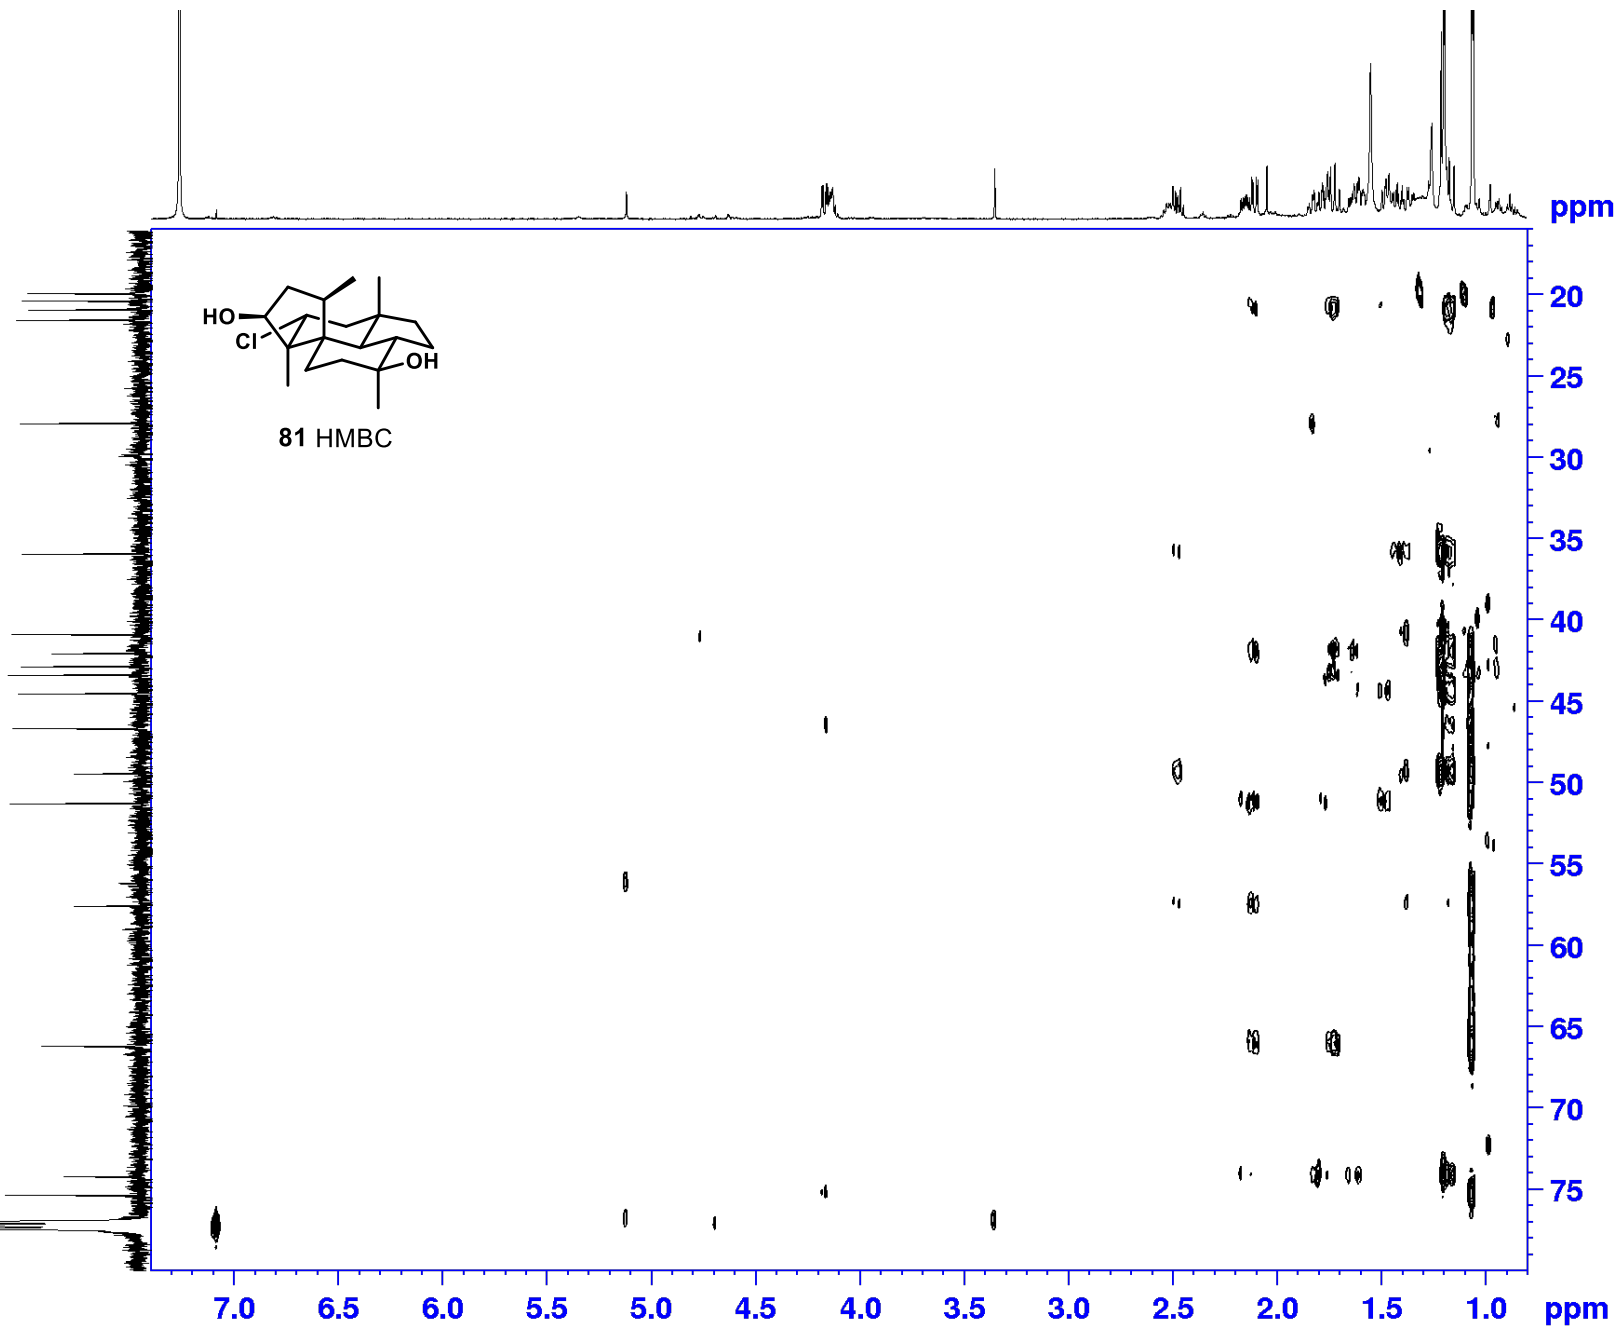

Current Data Parameters  
NAME JSCV-146-f27-39-2  
EXPNO 7  
PROCNO 1

F2 - Acquisition Parameters  
Date\_ 20220617  
Time 19.31  
INSTRUM av600  
PROBHD 5 mm CPBBO BB-  
PULPROG noesygpqh  
TD 2048  
SOLVENT CDCl3  
NS 2  
DS 16  
SWH 9615.385 Hz  
FIDRES 4.695012 Hz  
AQ 0.1064960 sec  
RG 101  
DW 52.000 usec  
DE 16.68 usec  
TE 298.0 K  
DO 0.00003990 sec  
D1 2.00000000 sec  
D8 1.00000000 sec  
D16 0.00020000 sec  
IN0 0.00010400 sec

==== CHANNEL f1 =====  
SF01 600.1342009 MHz  
NUC1 1H  
P1 9.50 usec  
P2 19.00 usec  
PLW1 30.00000000 W

===== GRADIENT CHANNEL =====  
GFNAM[1] SMSQ10.100  
GPZ1 40.00 %  
P16 1000.00 usec

F1 - Acquisition parameters  
TD 256  
SF01 600.1342 MHz  
FIDRES 75.120193 Hz  
SW 16.022 ppm  
FnMODE States-TPPI

F2 - Processing parameters  
SI 1024  
SF 600.1300380 MHz  
WDW QSINE  
SSB 2  
LB 0 Hz  
GB 0  
PC 1.00

F1 - Processing parameters  
SI 1024  
MC2 States-TPPI  
SF 600.1300331 MHz  
WDW QSINE  
SSB 2  
LB 0 Hz  
GB 0

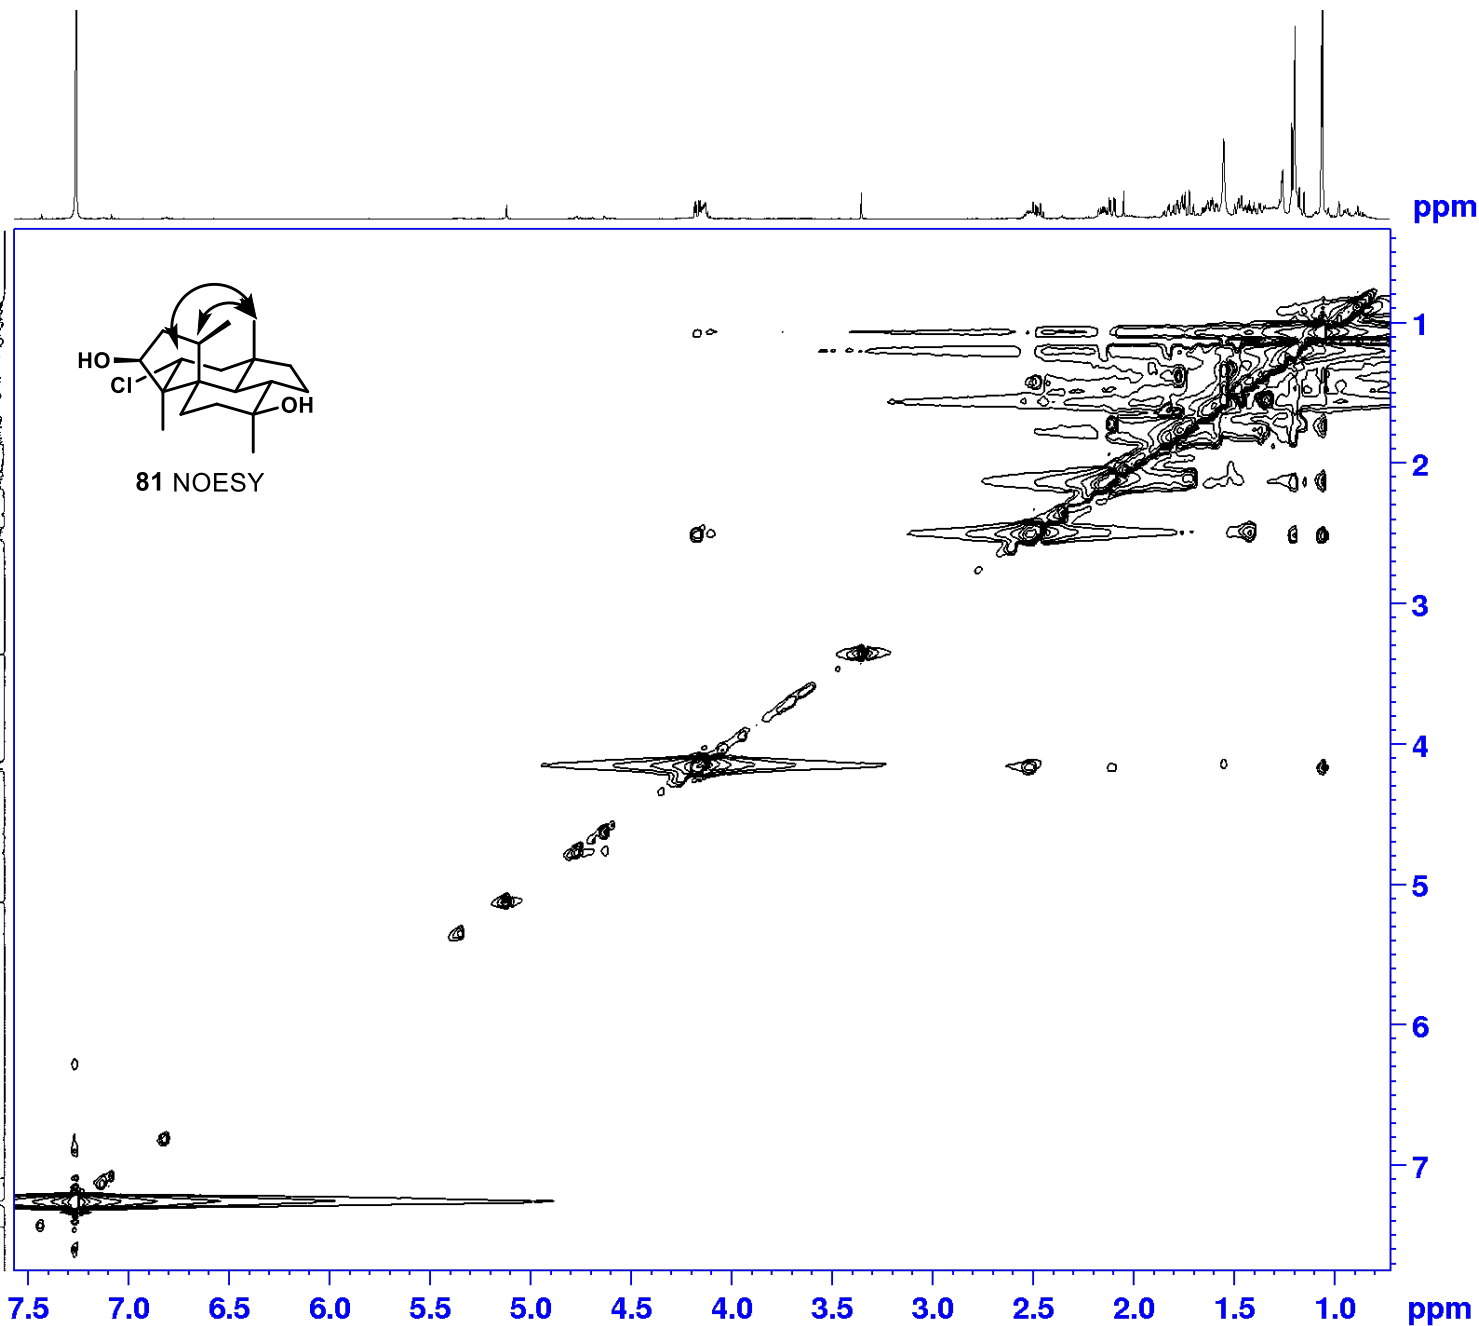



Current Data Parameters  
NAME JSCV-280-f6-20  
EXPNO 1  
PROCNO 1

F2 - Acquisition Parameters  
Date\_ 20221109  
Time\_ 11.22  
INSTRUM cryo500  
PROBHD 5 mm CPTCI 1H-  
PULPROG zg30  
TD 40062  
SOLVENT CDCl3  
NS 8  
DS 2  
SWH 8012.820 Hz  
FIDRES 0.200010 Hz  
AQ 2.4998689 sec  
RG 6.3  
DW 62.400 usec  
DE 6.00 usec  
TE 298.0 K  
D1 6.00000000 sec  
MCREST 0 sec  
MCWRK 0.01500000 sec

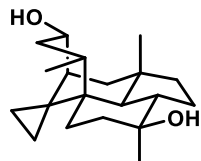

S24

==== CHANNEL f1 =====  
NUC1 1H  
P1 9.75 usec  
PL1 1.60 dB  
SFO1 500.2235015 MHz

F2 - Processing parameters  
SI 65536  
SF 500.2200319 MHz  
WDW EM  
SSB 0  
LB 0.30 Hz  
GB 0  
PC 1.00

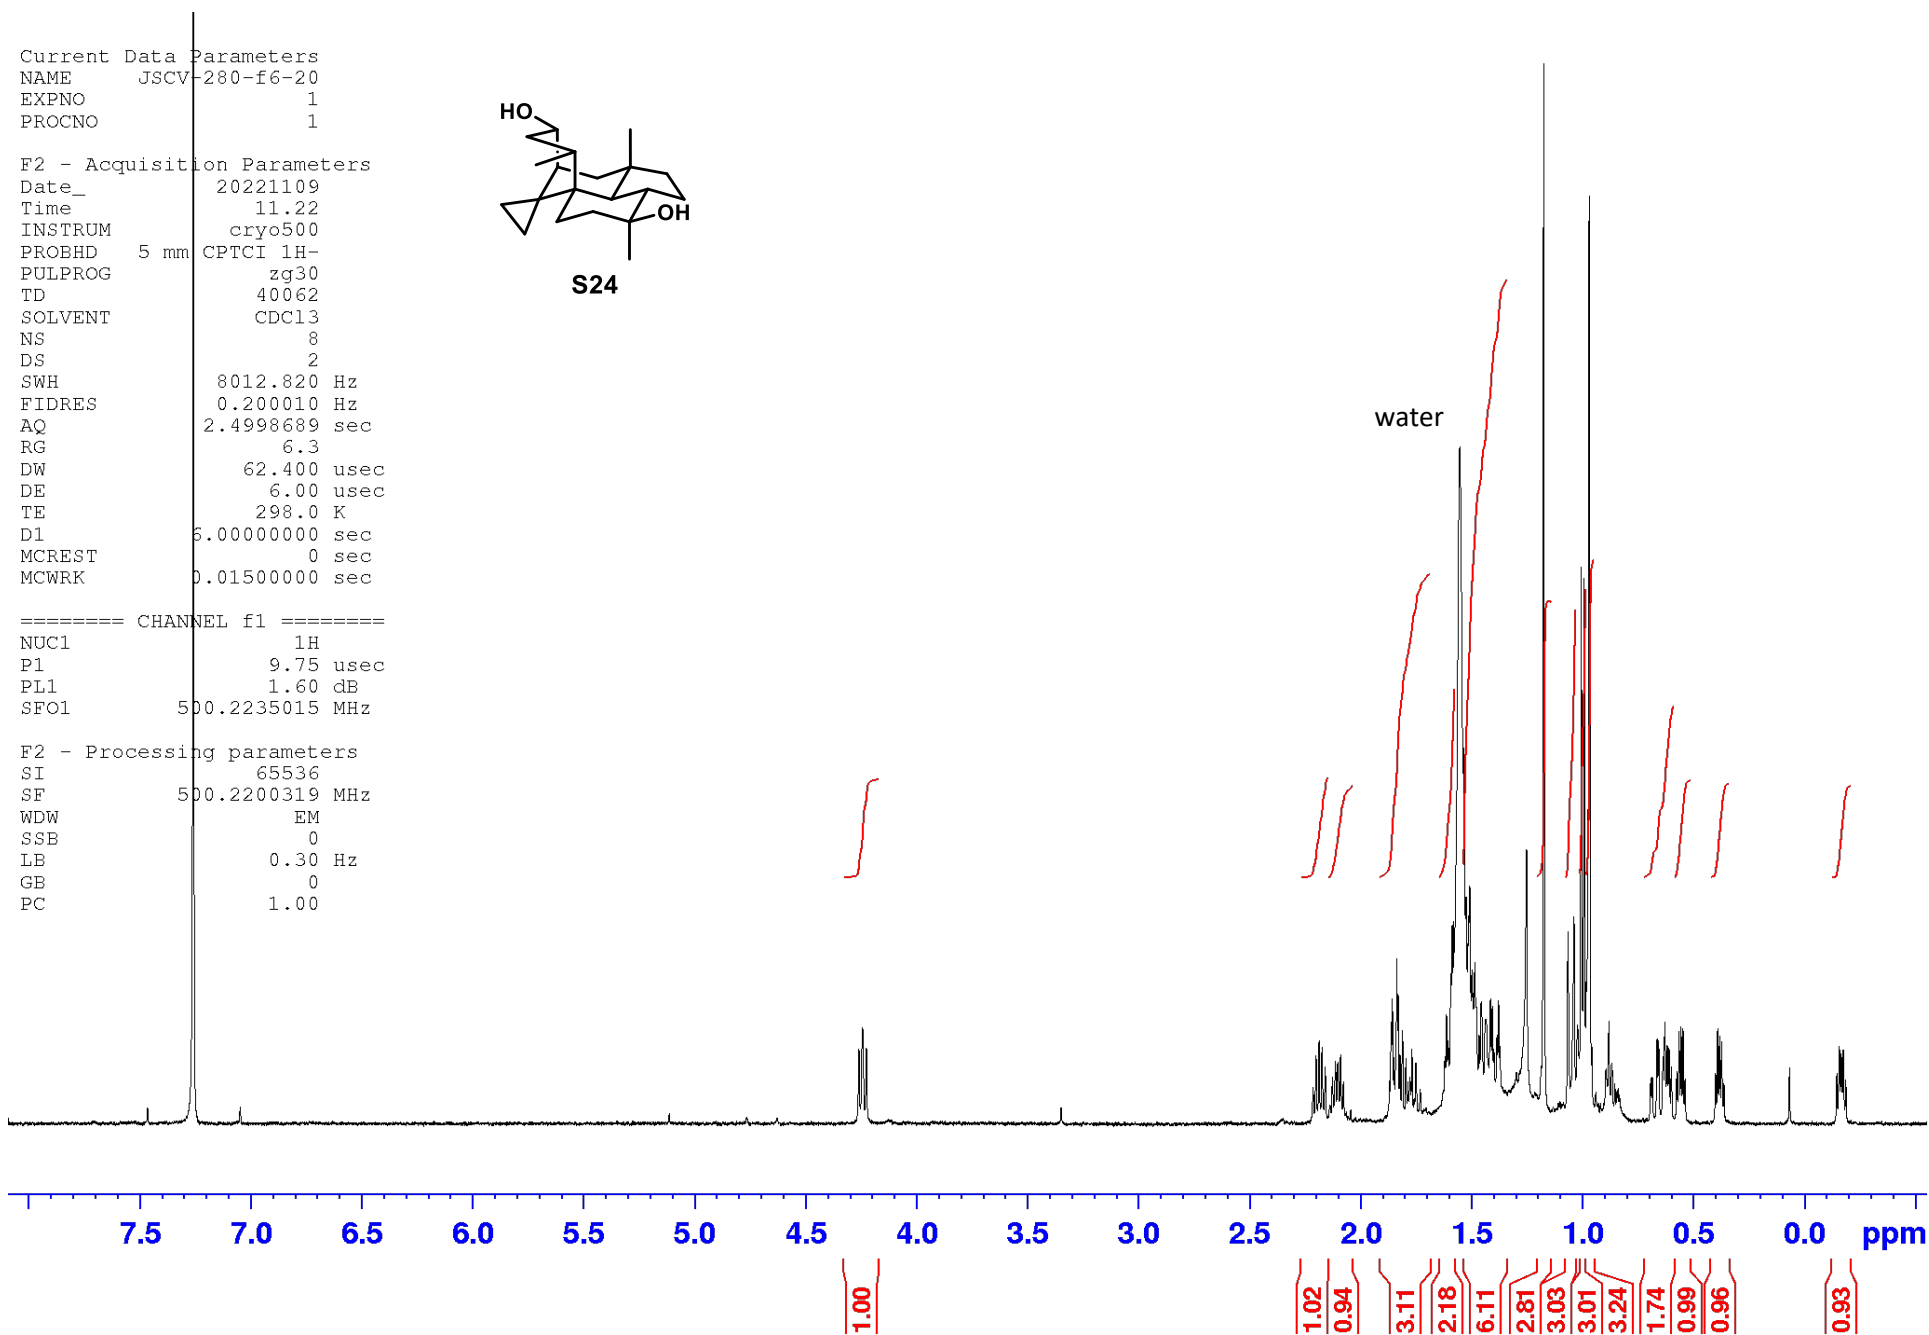

Current Data Parameters  
NAME JSCV-128-f6-17  
EXPNO 2  
PROCNO 1

F2 - Acquisition Parameters  
Date\_ 20220415  
Time 16.23  
INSTRUM av600  
PROBHD 5 mm CPBBO BB-  
PULPROG zgdc30  
TD 65536  
SOLVENT CDC13  
NS 451  
DS 4  
SWH 36231.883 Hz  
FIDRES 0.552855 Hz  
AQ 0.9043968 sec  
RG 2050  
DW 13.800 usec  
DE 19.63 usec  
TE 298.0 K  
D1 0.4000001 sec  
D11 0.03000000 sec  
TD0 1

----- CHANNEL f1 -----  
SFO1 150.9194080 MHz  
NUC1 13C  
P1 10.10 usec  
PLW1 64.00000000 W

----- CHANNEL f2 -----  
SFO2 600.1330010 MHz  
NUC2 1H  
CPDPRG2 waltz16  
PCPD2 80.00 usec  
PLW2 30.00000000 W  
PLW12 0.37154001 W

F2 - Processing parameters  
SI 65536  
SF 150.9027927 MHz  
WDW EM  
SSB 0  
LB 1.00 Hz  
GB 0  
PC 1.00

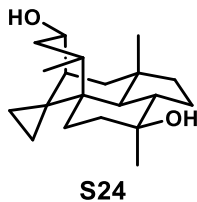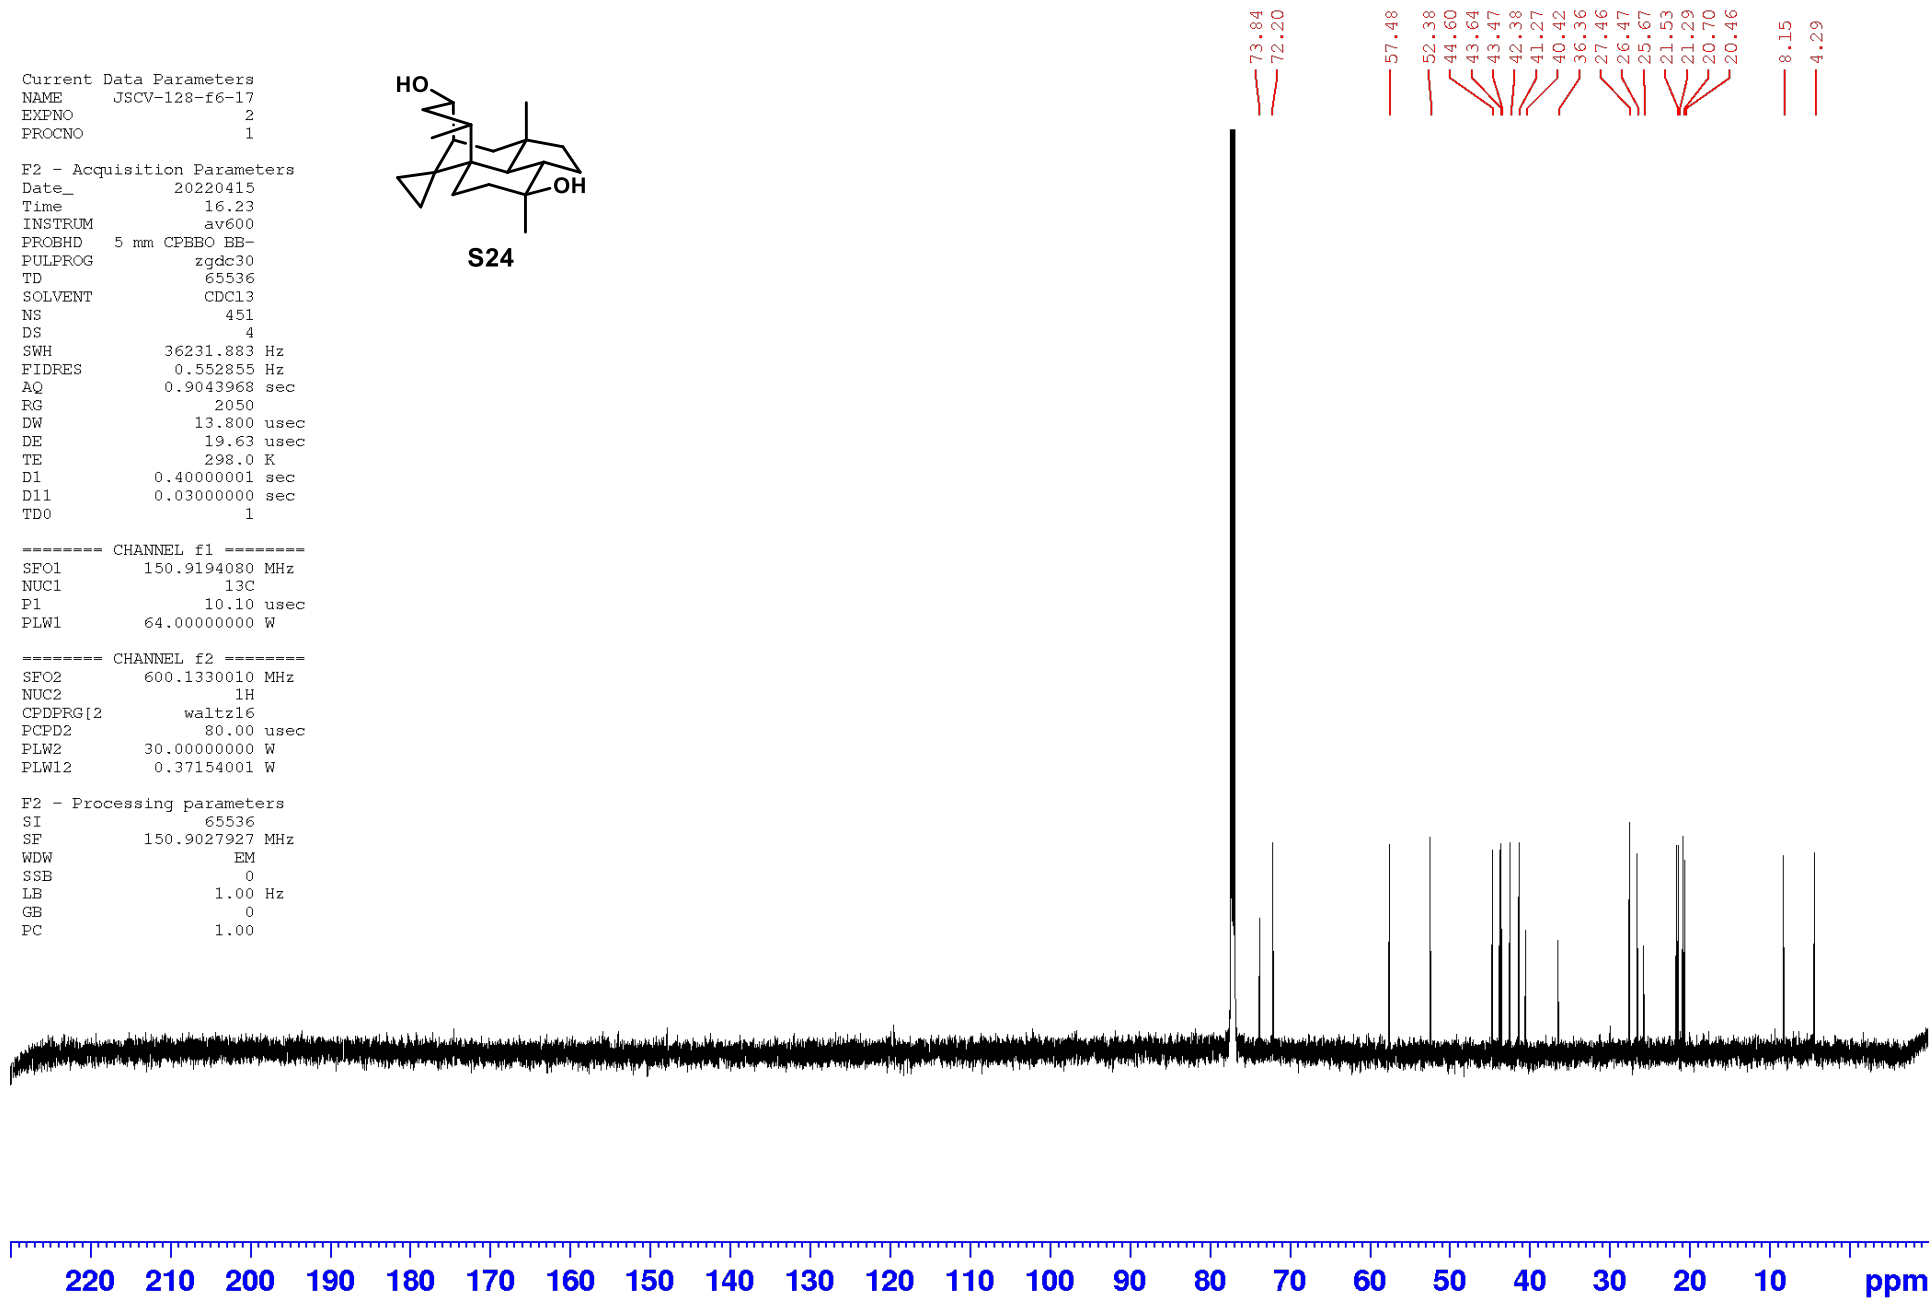

Current Data Parameters  
NAME JSCV-289B-f45-54  
EXPNO 1  
PROCNO 1

F2 - Acquisition Parameters  
Date\_ 20221129  
Time 17.19  
INSTRUM av600  
PROBHD 5 mm CPTCI 1H-  
PULPROG zg30  
TD 48074  
SOLVENT CDC13  
NS 19  
DS 2  
SWH 9615.385 Hz  
FIDRES 0.200012 Hz  
AQ 2.4998479 sec  
RG 2050  
DW 52.000 usec  
DE 14.54 usec  
TE 298.1 K  
D1 6.0000000 sec  
TD0 1

==== CHANNEL f1 =====  
SFO1 600.1342009 MHz  
NUC1 1H  
P1 8.00 usec  
PLW1 6.1659989 W

F2 - Processing parameters  
SI 65536  
SF 600.1300344 MHz  
WDW EM  
SSB 0  
LB 0.30 Hz  
GB 0  
PC 1.00

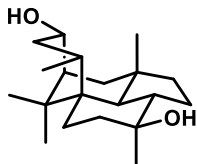

wickerol B (2)

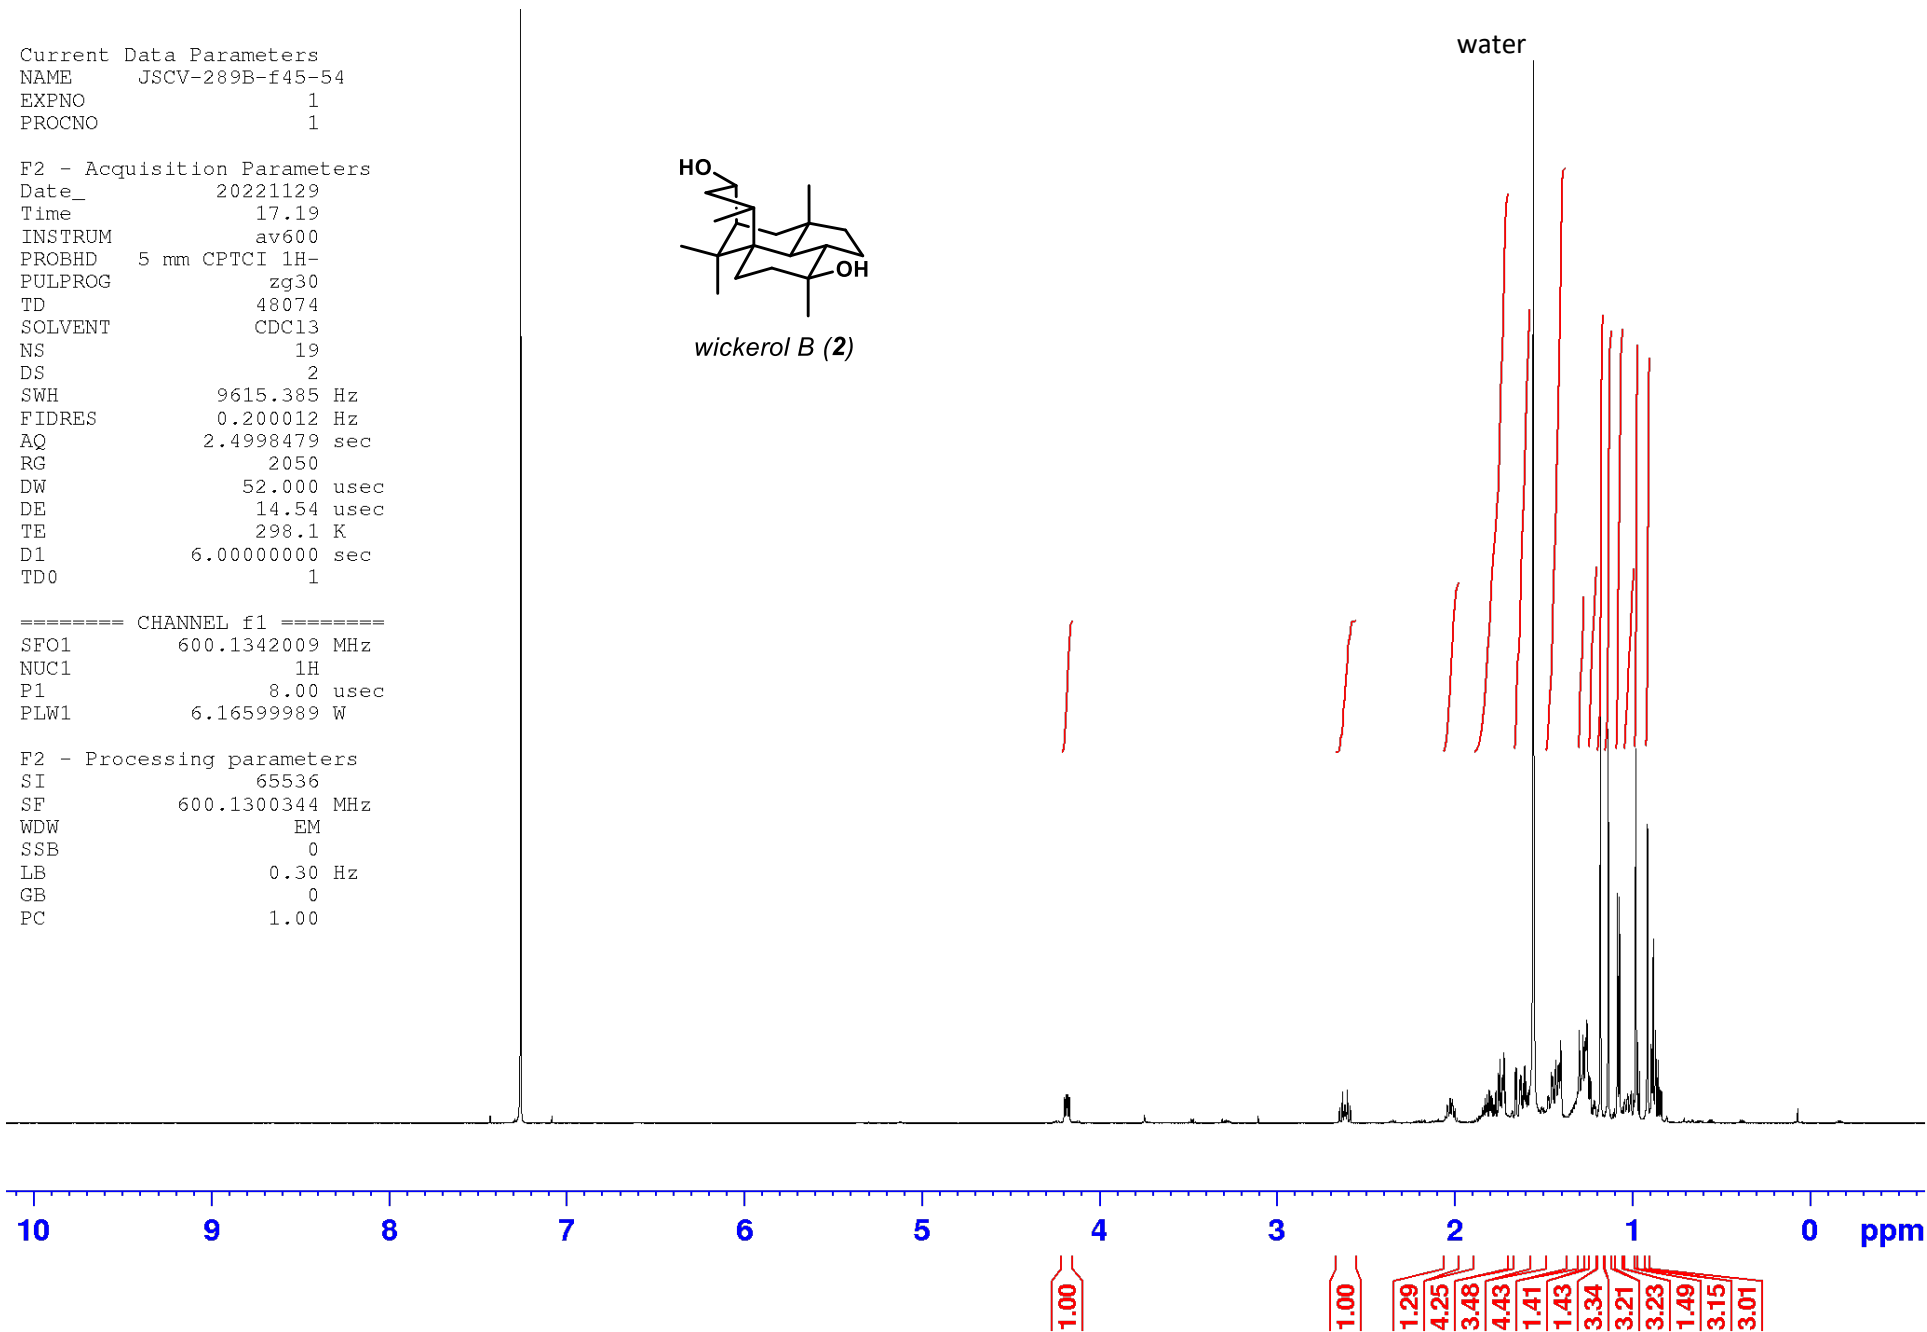

Current Data Parameters  
NAME JSCV-289B-f45-54  
EXPNO 2  
PROCNO 1

F2 - Acquisition Parameters  
Date\_ 20221129  
Time 17.25  
INSTRUM av600  
PROBHD 5 mm CPTCI 1H-  
FULPROG SpinEchopg30gp2.prdts  
TD 108692  
SOLVENT CDC13  
NS 168  
DS 16  
SWH 36231.883 Hz  
FIDRES 0.333345 Hz  
AQ 1.4999496 sec  
RG 2050  
DW 13.800 usec  
DE 18.44 usec  
TE 298.1 K  
D1 4.00000000 sec  
D11 0.03000000 sec  
D16 0.00020000 sec  
D17 0.00019600 sec  
P2 37.50 usec  
TD0 1

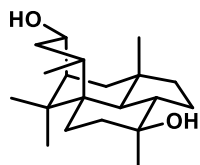

wickerol B (2)

=====  
SFO1 150.9194080 MHz  
NUC1 13C  
F1 18.75 usec  
F13 2000.00 usec  
P26 500.00 usec  
PLW0 0 W  
PLW1 164.00000000 W  
SPNAM[5] Crp60comp.4  
SPOAL5 0.500  
SPOFFS5 0 Hz  
SPW5 92.25700378 W  
SPNAM[8] Crp60,0.5,20.1  
SPOAL8 0.500  
SPOFFS8 0 Hz  
SPW8 92.25700378 W

=====  
SFO2 600.1330010 MHz  
NUC2 1H  
CPDPRG[2] waltz16  
PCPD2 80.00 usec  
PLW2 6.16599989 W  
PLW12 0.04466800 W

=====  
SPNAM[1] SMSQ1b.100  
SPOAL1 0.500  
SPOFFS1 0 Hz  
SPW1 1000.00 usec

F2 - Processing parameters  
SI 65536  
SF 150.9027931 MHz  
WDW EM  
SSB 0  
LB 1.00 Hz  
GB 0  
PC 1.00

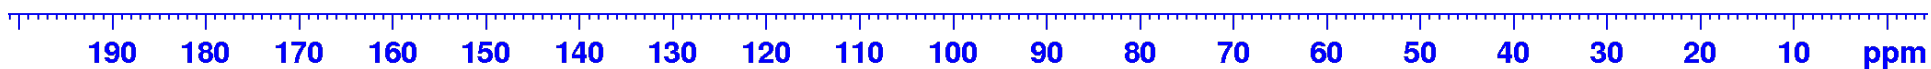

73.91  
72.82  
52.61  
51.99  
44.30  
43.61  
41.94  
41.24  
41.06  
39.42  
39.27  
38.97  
26.60  
26.24  
26.09  
25.06  
22.51  
21.63  
20.64  
19.83

hexane  
hexane  
hexane

Current Data Parameters  
NAME JSCV-130B-f5-11-2  
EXPNO 1  
PROCNO 1

F2 - Acquisition Parameters  
Date\_ 20220425  
Time 21.15  
INSTRUM av600  
PROBHD 5 mm CPBBO BB-  
PULPROG zg30  
TD 48072  
SOLVENT CDC13  
NS 16  
DS 2  
SWH 9615.385 Hz  
FIDRES 0.200020 Hz  
AQ 2.4997439 sec  
RG 20.2  
DW 52.000 usec  
DE 14.23 usec  
TE 298.0 K  
D1 4.00000000 sec  
TD0 1

==== CHANNEL f1 =====  
SFO1 500.1342009 MHz  
NUC1 1H  
P1 9.50 usec  
PLW1 30.00000000 W

F2 - Processing parameters  
SI 65536  
SF 500.1300343 MHz  
WDW EM  
SSB 0  
LB 0.30 Hz  
GB 0  
PC 1.00

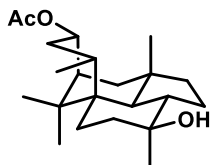

8-O-acetyl  
wickero B (85)

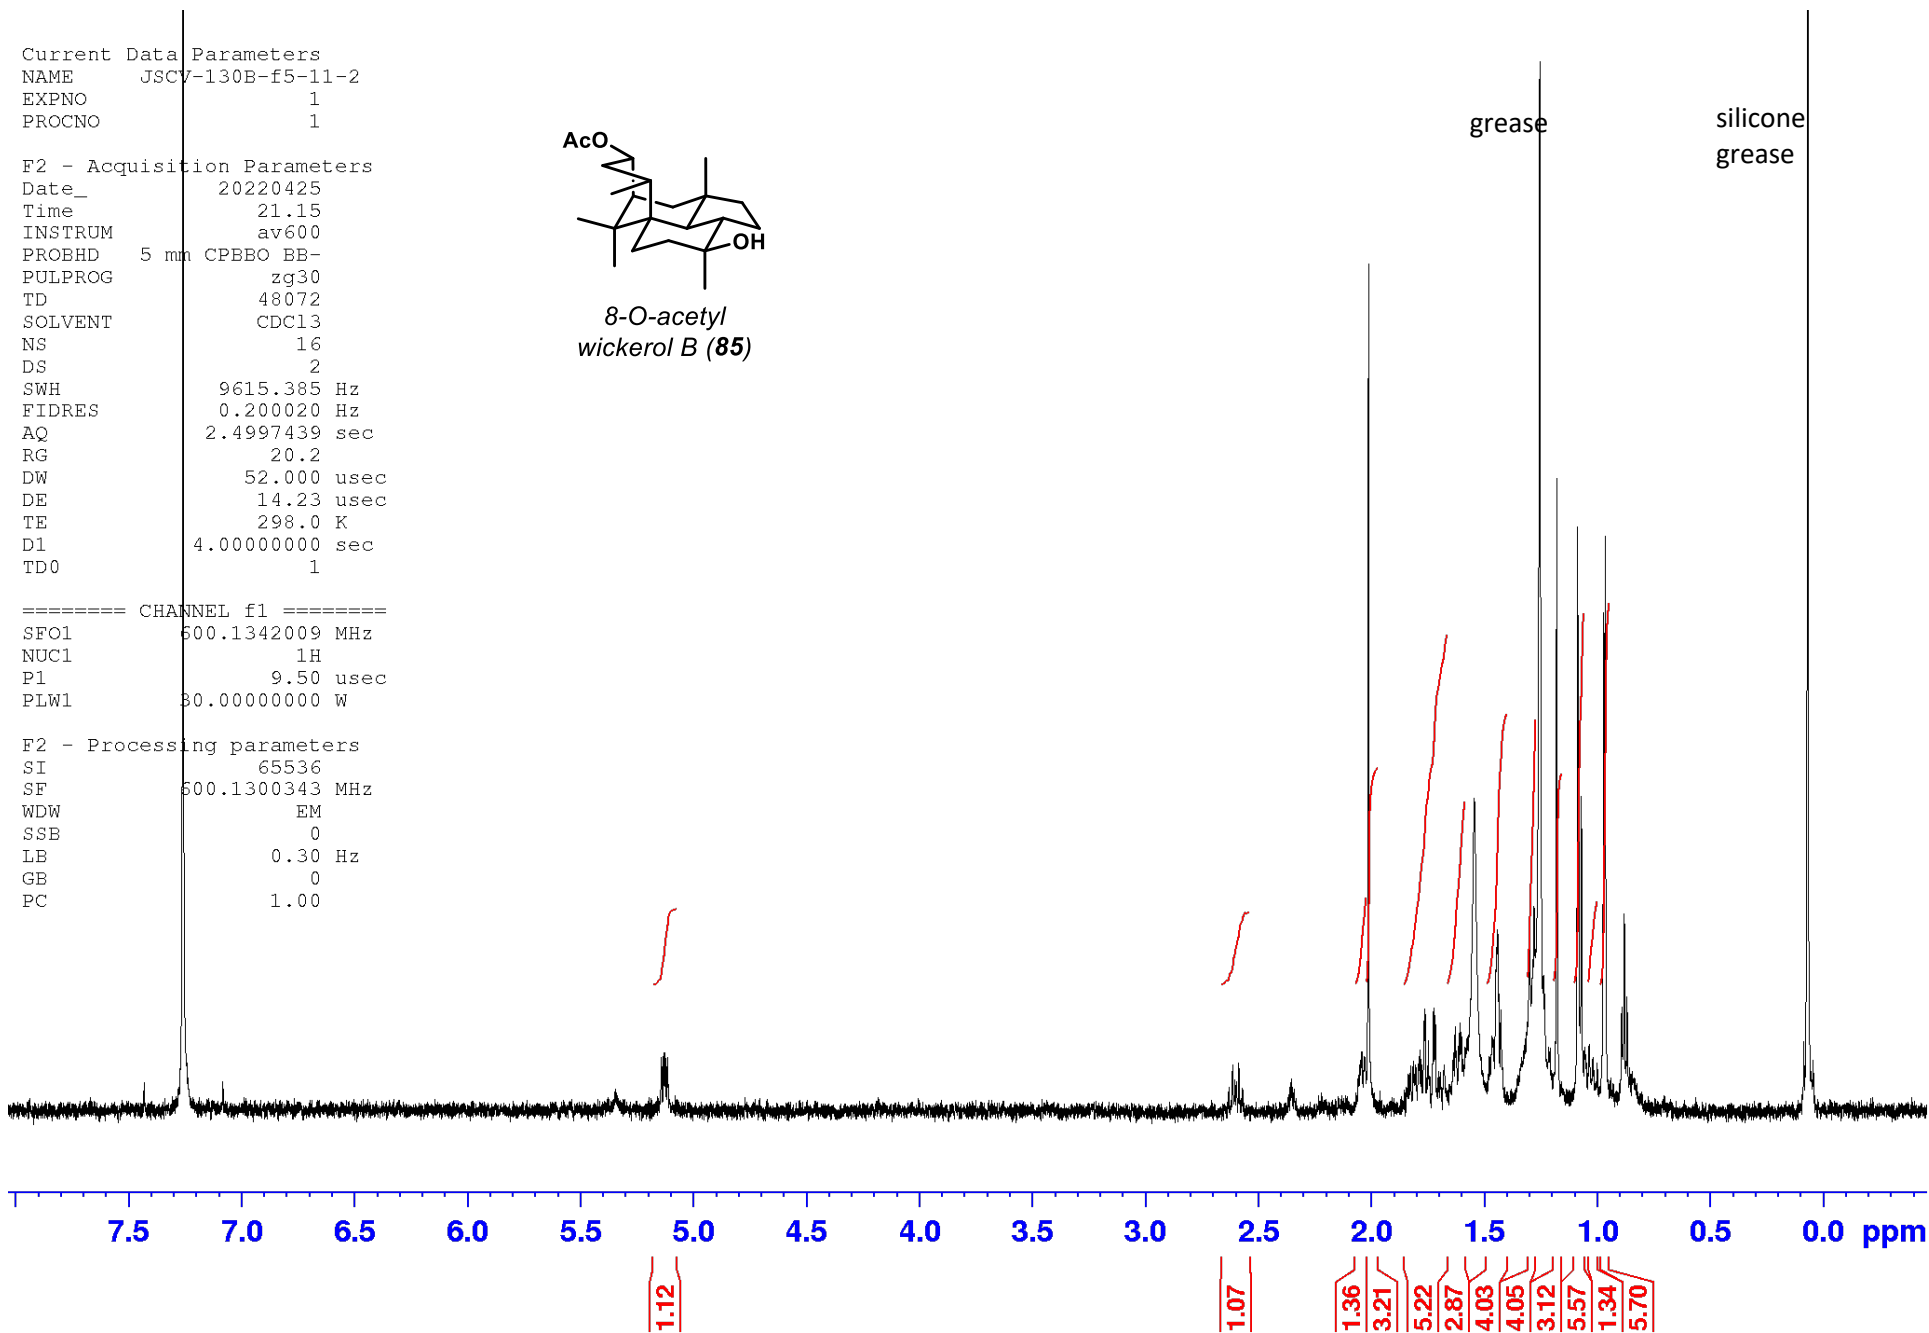

Current Data Parameters  
NAME JSCV-130B-f5-11-2  
EXPNO 3  
PROCNO 1

F2 - Acquisition Parameters  
Date\_ 20220426  
Time 5.53  
INSTRUM av600  
PROBHD 5 mm CPBBO BB-  
PULPROG zgdc30  
TD 65536  
SOLVENT CDC13  
NS 12288  
DS 4  
SWH 36231.883 Hz  
FIDRES 0.552855 Hz  
AQ 0.9043968 sec  
RG 2050  
DW 13.800 usec  
DE 19.63 usec  
TE 298.0 K  
D1 1.50000000 sec  
D11 0.03000000 sec  
TD0 1

----- CHANNEL f1 -----  
SFO1 150.9194080 MHz  
NUC1 13C  
P1 10.10 usec  
PLW1 64.00000000 W

----- CHANNEL f2 -----  
SFO2 600.1330010 MHz  
NUC2 1H  
CPDPRG[2] waltz16  
PCPD2 80.00 usec  
PLW2 30.00000000 W  
PLW12 0.37154001 W

F2 - Processing parameters  
SI 65536  
SF 150.9027924 MHz  
WDW EM  
SSB 0  
LB 1.00 Hz  
GB 0  
PC 1.00

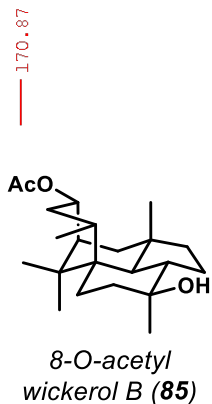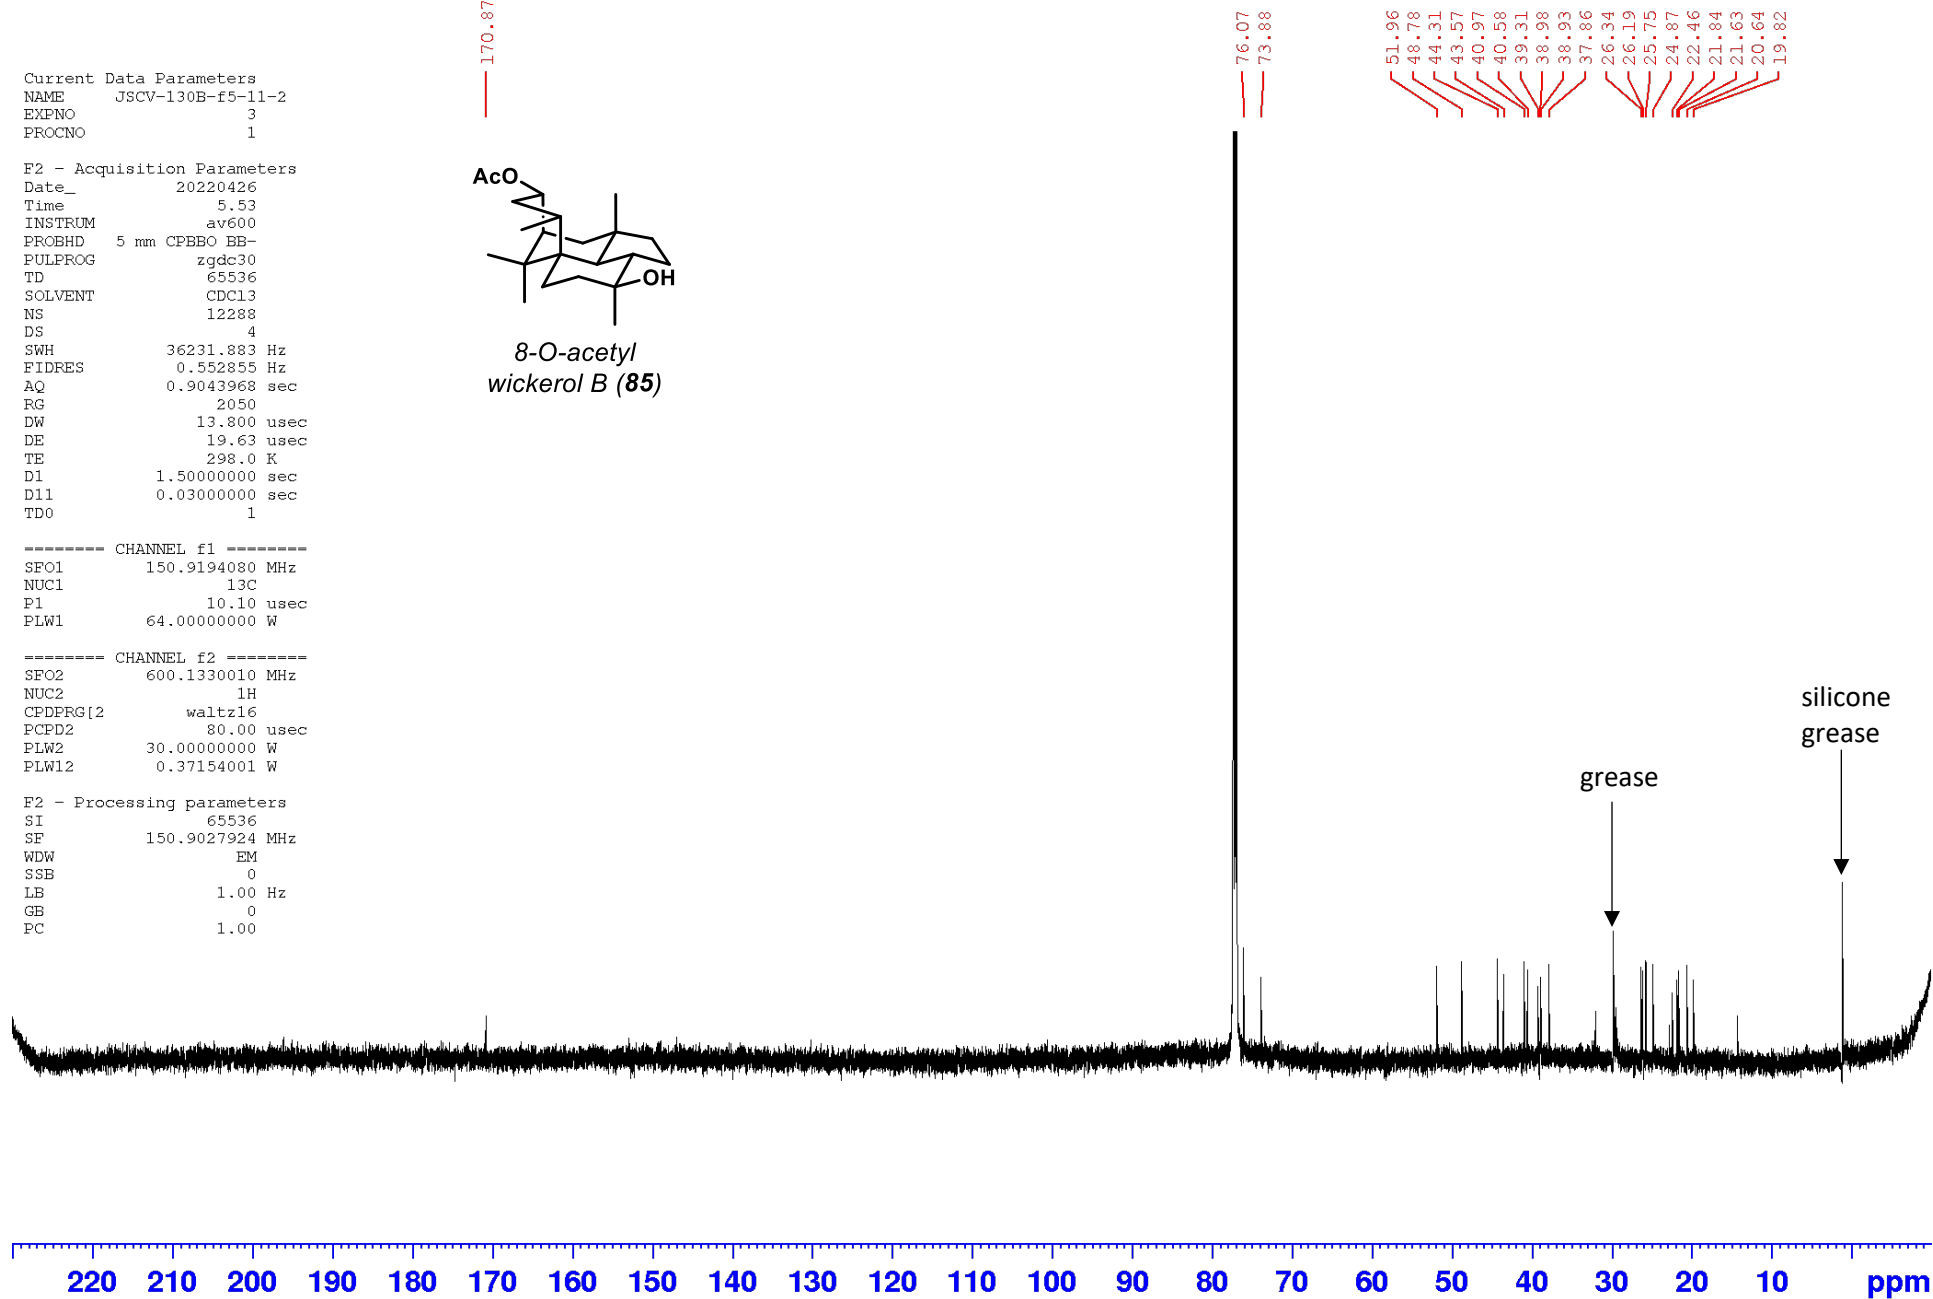

Current Data Parameters  
NAME JSCVI-004-f17-22-recheck  
EXPNO 1  
PROCNO 1

F2 - Acquisition Parameters  
Date\_ 20221214  
Time 18.51  
INSTRUM cryo500  
PROBHD 5 mm CPTCI 1H-  
PULPROG zg30  
TD 81728  
SOLVENT CDC13  
NS 8  
DS 2  
SWH 8012.820 Hz  
FIDRES 0.098043 Hz  
AQ 5.0998273 sec  
RG 7.1  
DW 62.400 usec  
DE 6.00 usec  
TE 298.0 K  
D1 0.1000000 sec  
MCREST 0 sec  
MCWRK 0.0150000 sec

==== CHANNEL f1 =====  
NUC1 1H  
P1 9.75 usec  
PL1 1.60 dB  
SFO1 500.2235015 MHz

F2 - Processing parameters  
SI 65536  
SF 500.2200314 MHz  
WDW EM  
SSB 0  
LB 0.30 Hz  
GB 0  
PC 1.00

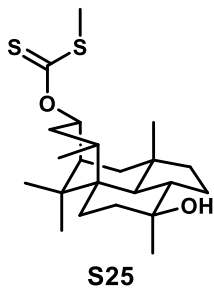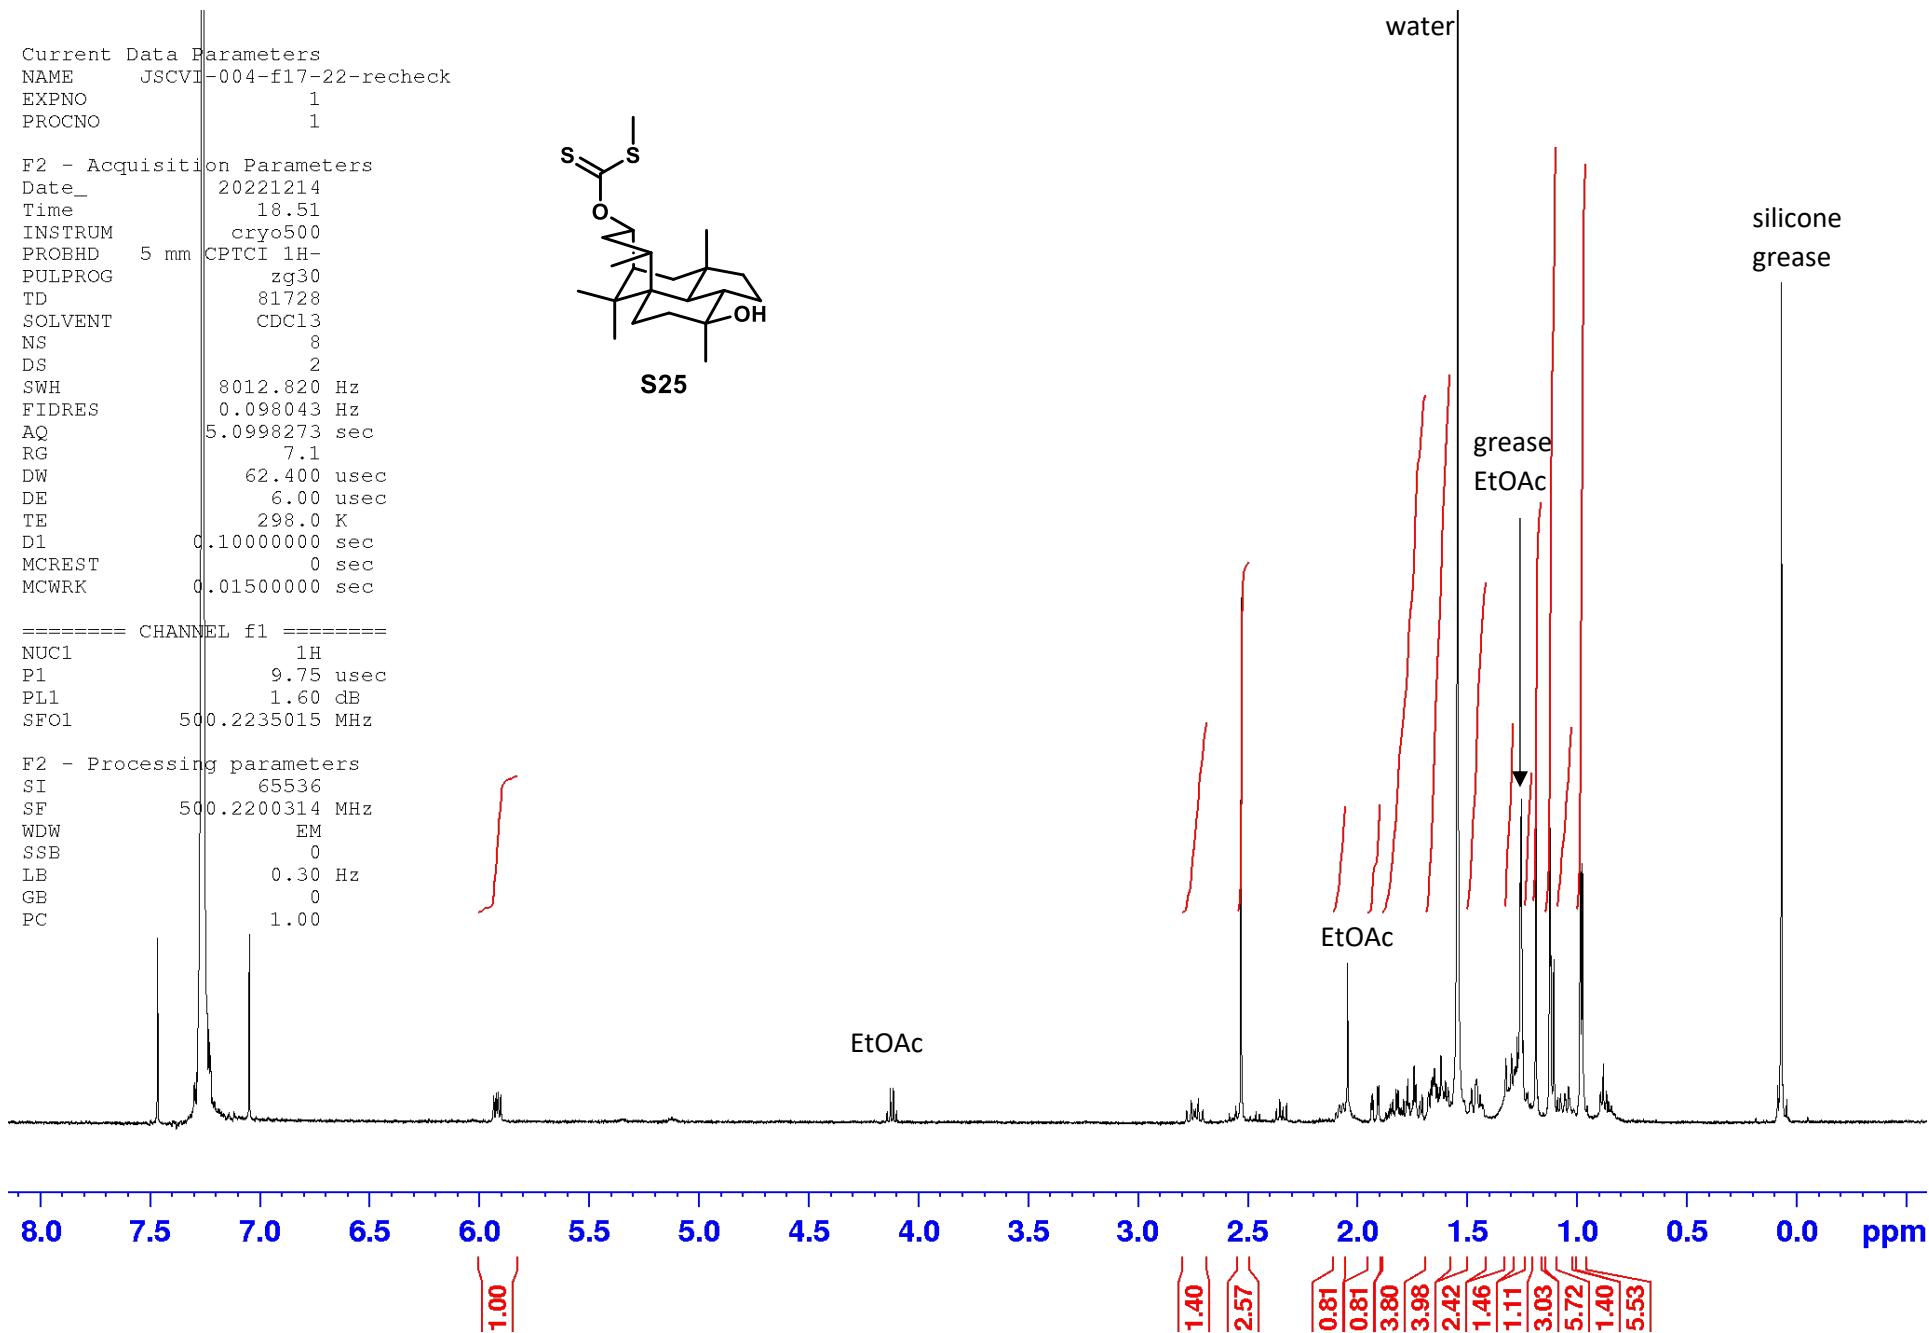

Current Data Parameters  
NAME JSCVI-005-f12-23  
EXPNO 1  
PROCNO 1

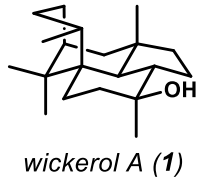

F2 - Acquisition Parameters  
Date\_ 20221216  
Time 20.39  
INSTRUM av600  
PROBHD 5 mm CPTCI 1H-  
PULPROG zg30  
TD 98074  
SOLVENT CDCl3  
NS 32  
DS 2  
SWH 9615.385 Hz  
FIDRES 0.098042 Hz  
AQ 5.0998478 sec  
RG 1820  
DW 52.000 usec  
DE 14.54 usec  
TE 297.7 K  
D1 0.1000000 sec  
TD0 1

==== CHANNEL f1 =====  
SFO1 600.1342009 MHz  
NUC1 1H  
P1 8.00 usec  
PLW1 6.16599989 W

F2 - Processing parameters  
SI 65536  
SF 600.1300343 MHz  
WDW EM  
SSB 0  
LB 0.30 Hz  
GB 0  
PC 1.00

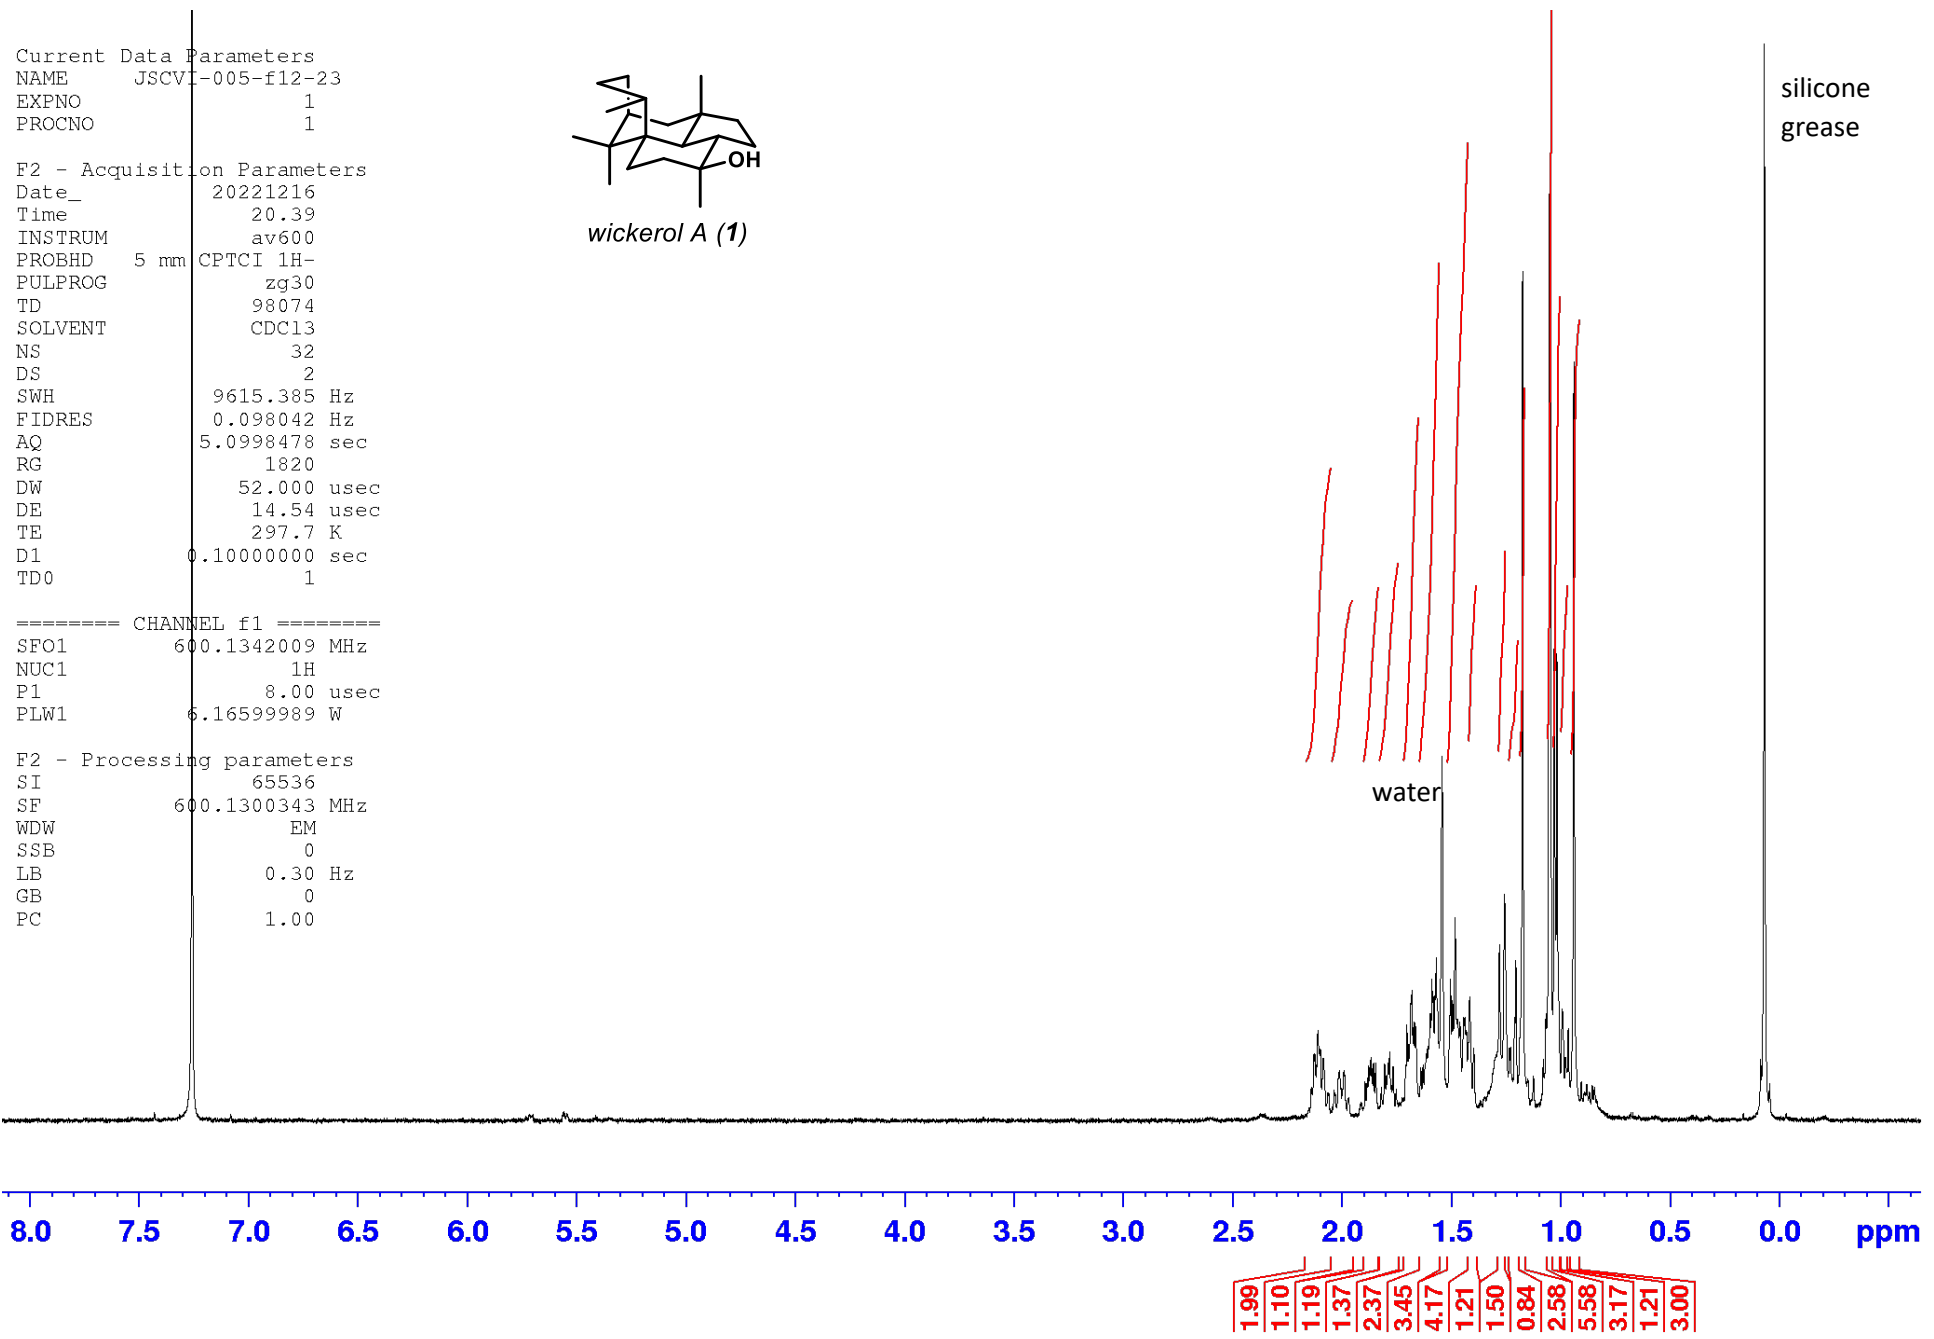



Current Data Parameters  
NAME JSCVI-005-fl2-23  
EXPNO 2  
PROCNO 1

F2 - Acquisition Parameters  
Date\_ 20221216  
Time 20.46  
INSTRUM av600  
PROBHD 5 mm CPTCI 1H-  
FULPROG SpinEchopg30gp2.prdts  
TD 72460  
SOLVENT CDC13  
NS 6144  
DS 16  
SWH 36231.883 Hz  
FIDRES 0.500026 Hz  
AQ 0.9999480 sec  
RG 2050  
DW 13.800 usec  
DE 18.44 usec  
TE 297.7 K  
D1 5.00000000 sec  
D11 0.03000000 sec  
D16 0.00020000 sec  
D17 0.00019600 sec  
P2 37.50 usec  
TD0 1

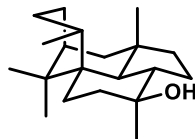

wickerol A (1)

=====  
SFO1 150.9194080 MHz  
NUC1 13C  
F1 18.75 usec  
F13 2000.00 usec  
P26 500.00 usec  
PLW0 0 W  
PLW1 164.00000000 W  
SPNAM[5] Crp60comp.4  
SPOAL5 0.500  
SPOFFS5 0 Hz  
SPW5 92.25700378 W  
SPNAM[8] Crp60,0.5,20.1  
SPOAL8 0.500  
SPOFFS8 0 Hz  
SPW8 92.25700378 W

=====  
SFO2 600.1330010 MHz  
NUC2 1H  
PCPDPRG[2] waltz16  
PCPD2 80.00 usec  
PLW2 6.16599989 W  
PLW12 0.04466800 W

=====  
GPNAM[1] SMSQ10.100  
GPNAM[2] SMSQ10.100  
GPZ1 30.00 %  
GPZ2 50.00 %  
P15 500.00 usec  
P16 1000.00 usec

=====  
SSB 0  
LB 1.00 Hz  
GB 0  
PC 1.00

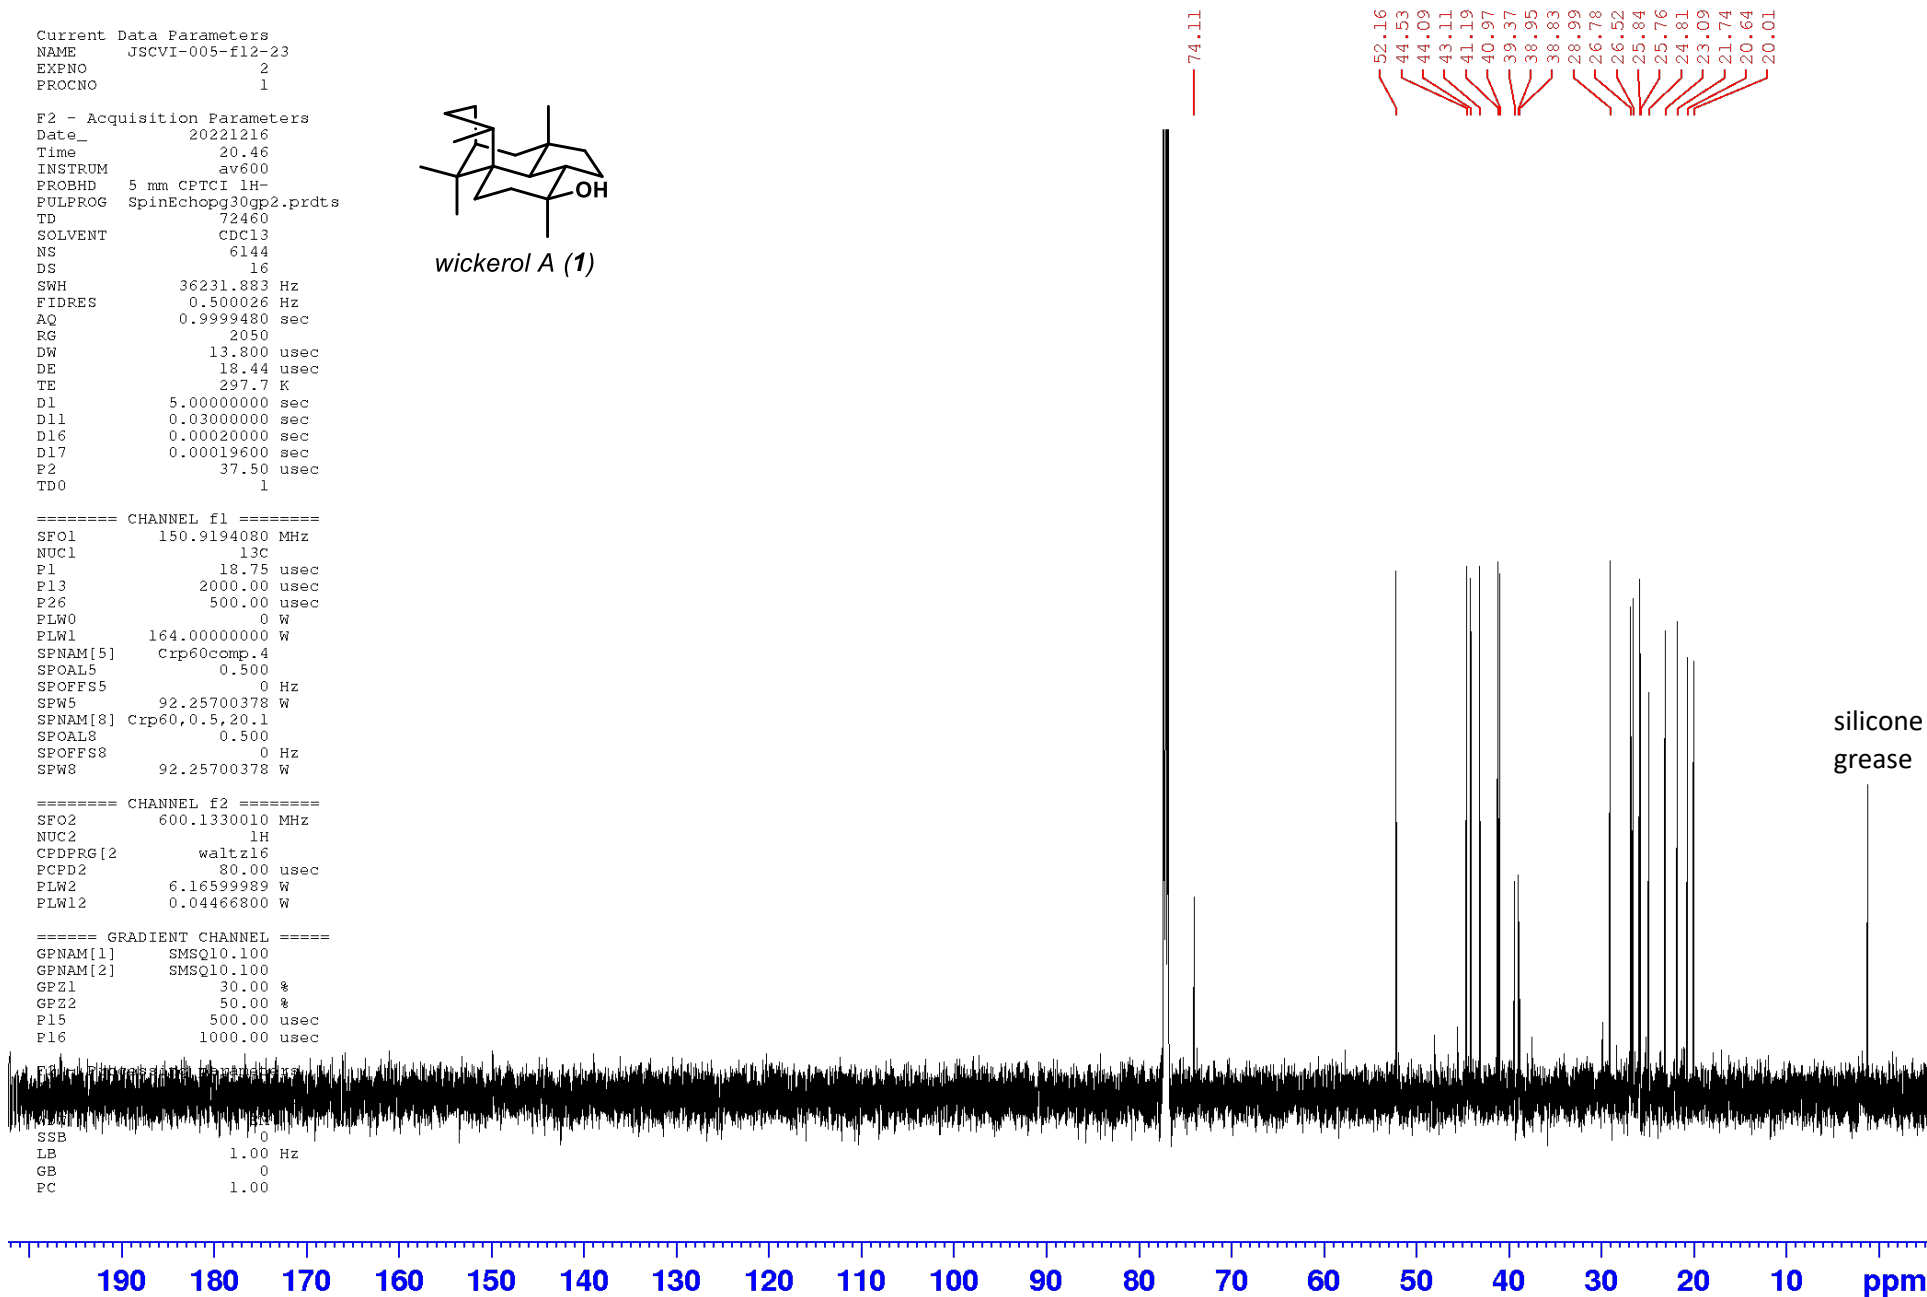

Comparison of Spectra Data – wickerol A (1)

JSCVI-005-f12-23 1 1 "G:\My Drive\File Archive\NMR Raw Data\JSCVI"

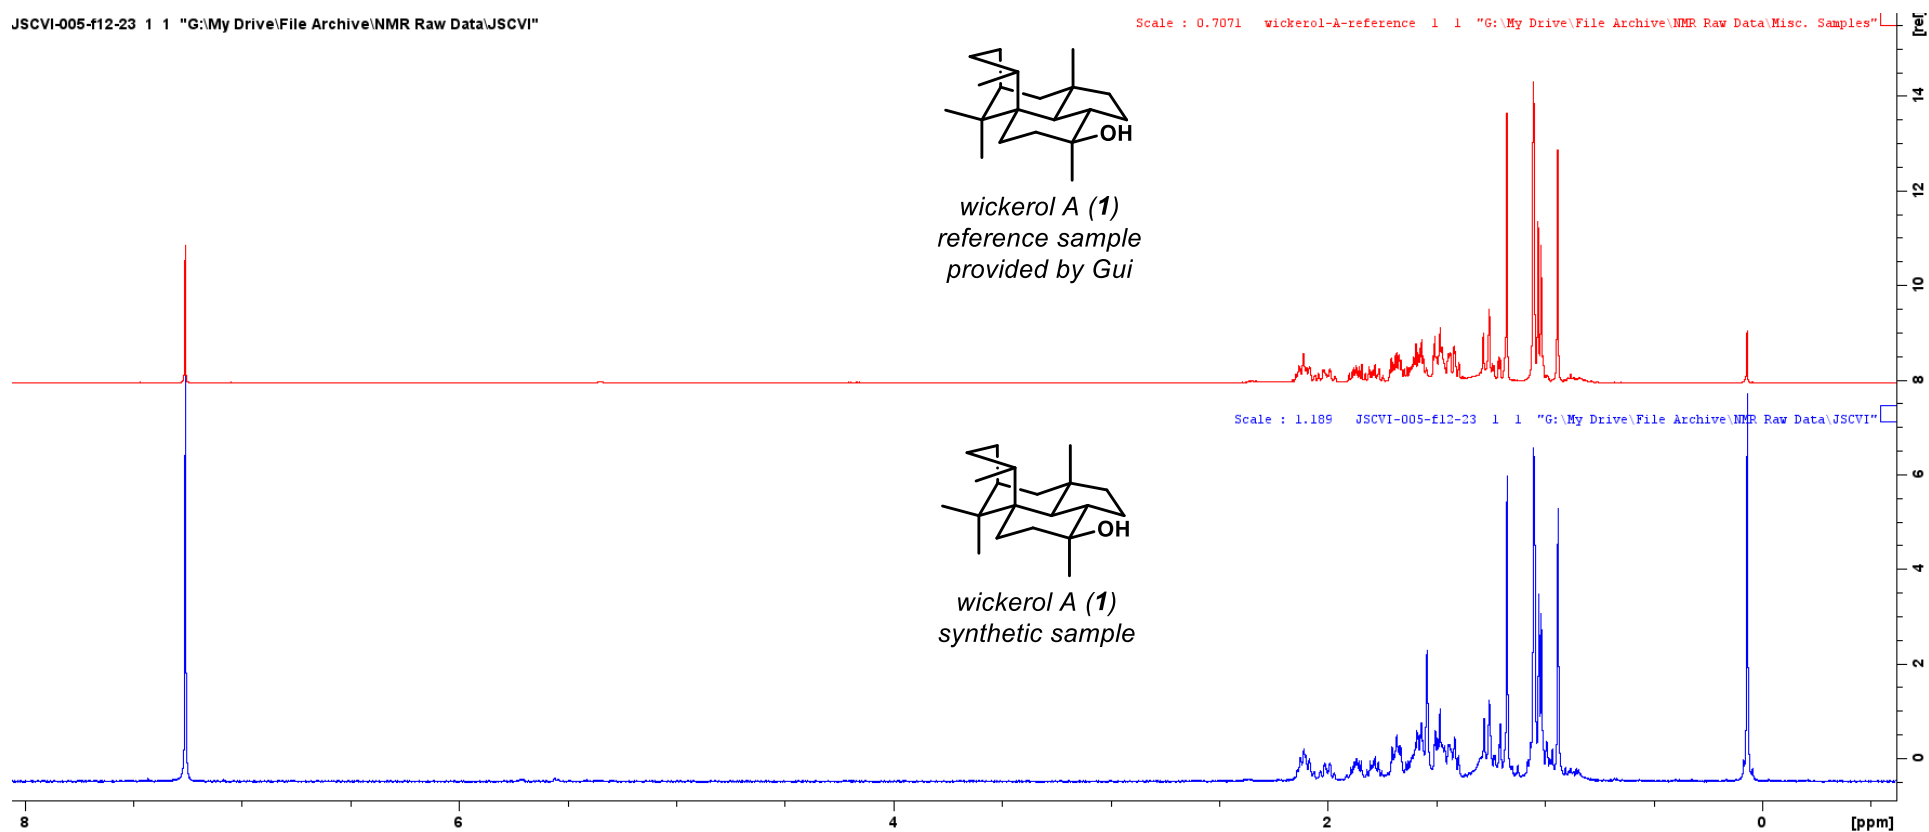

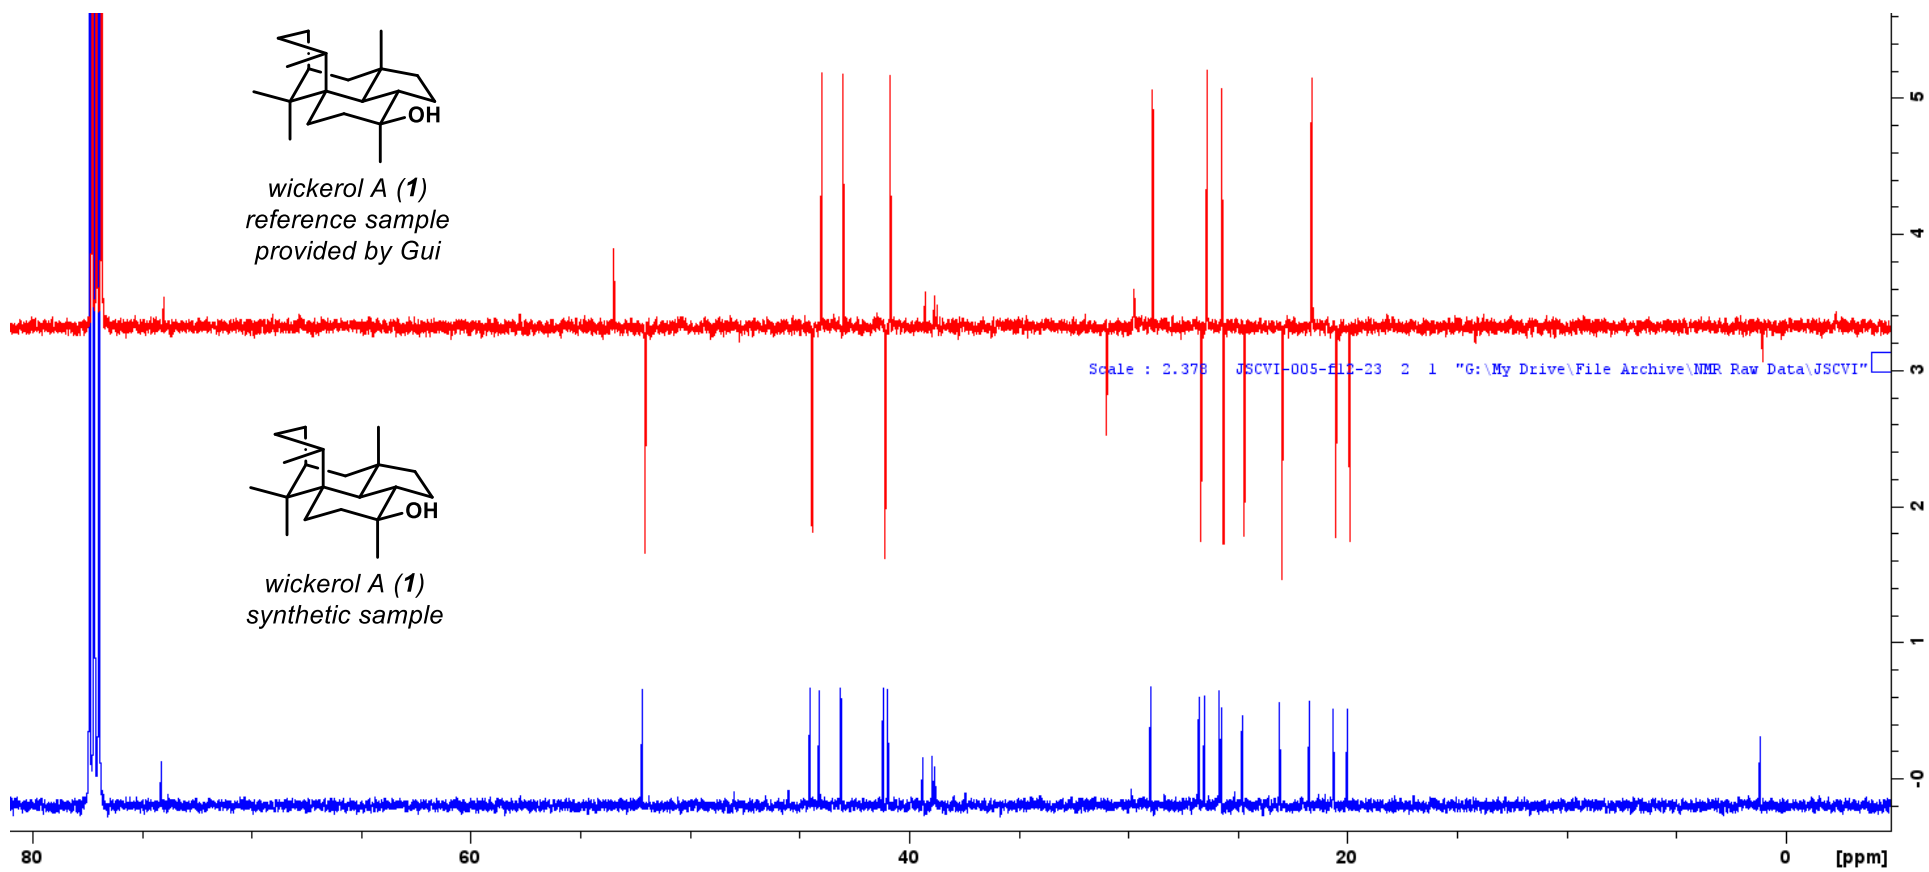

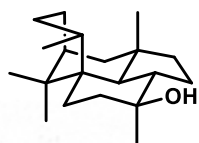

wickerol A (1)  
Ōmura's  
natural sample

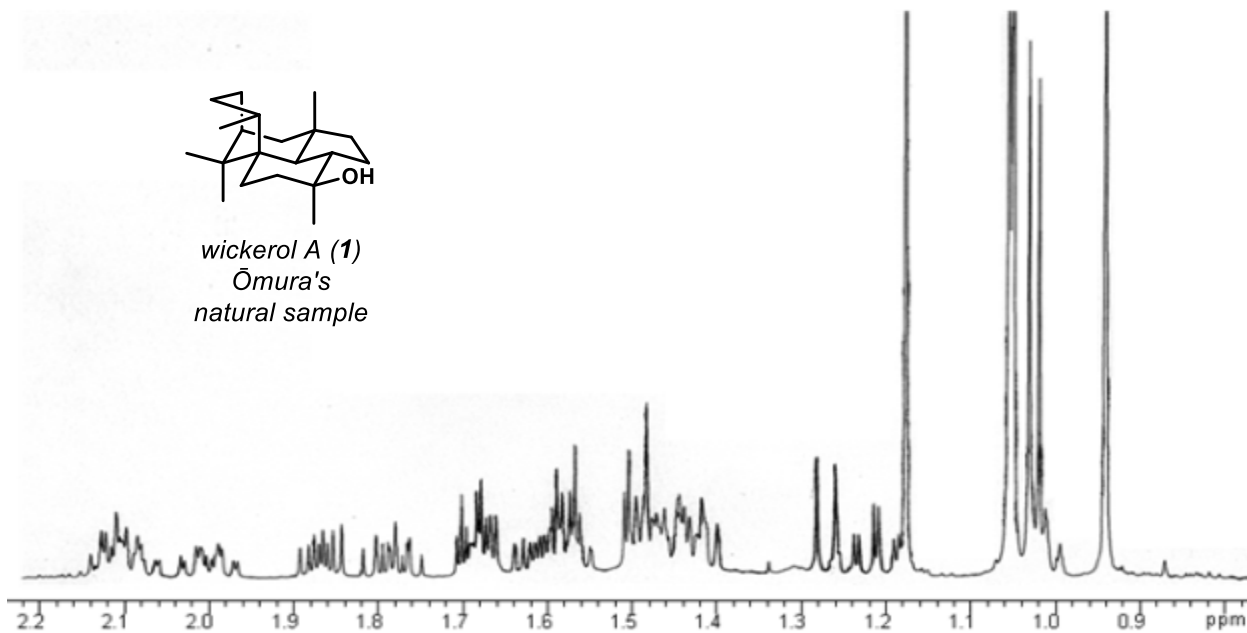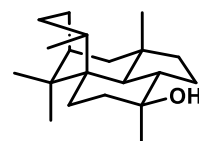

wickerol A (1)  
synthetic sample

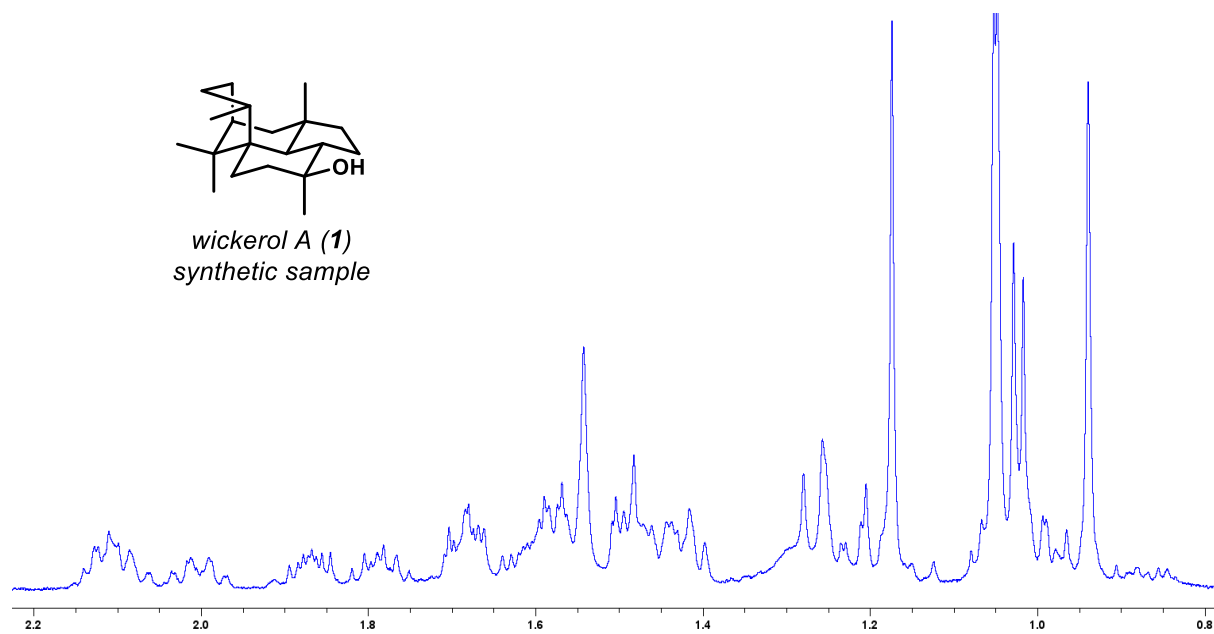

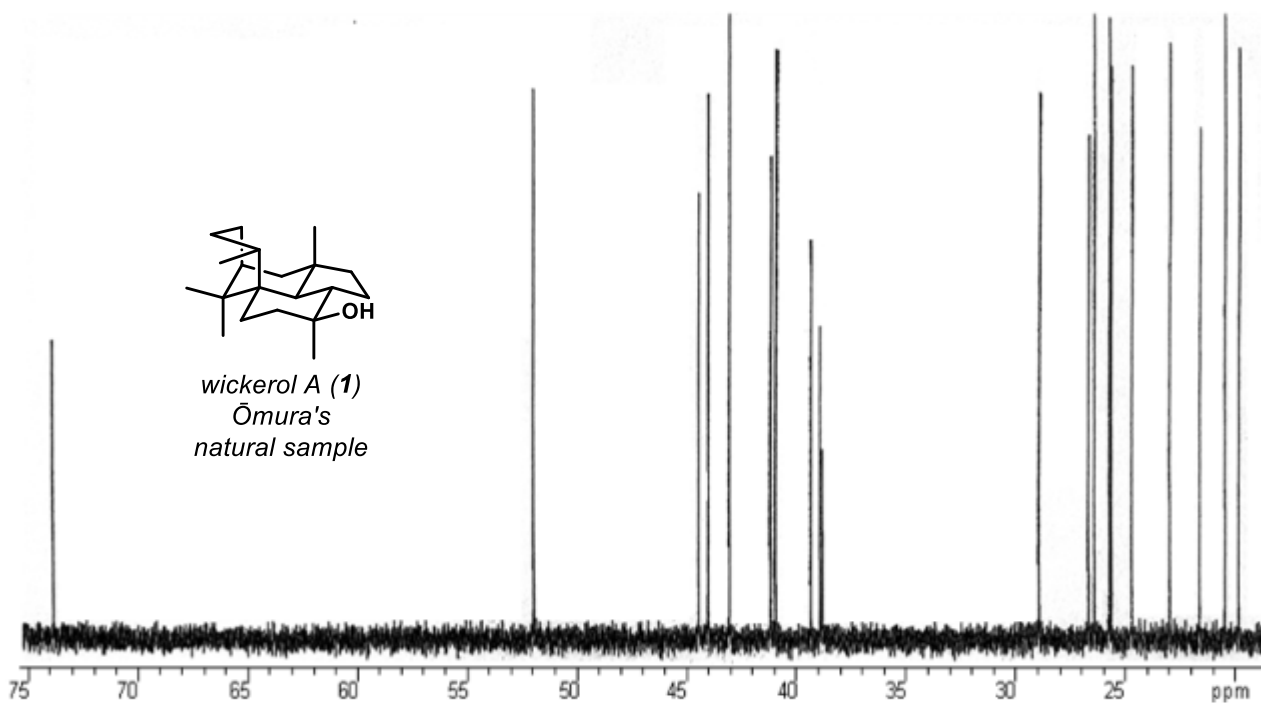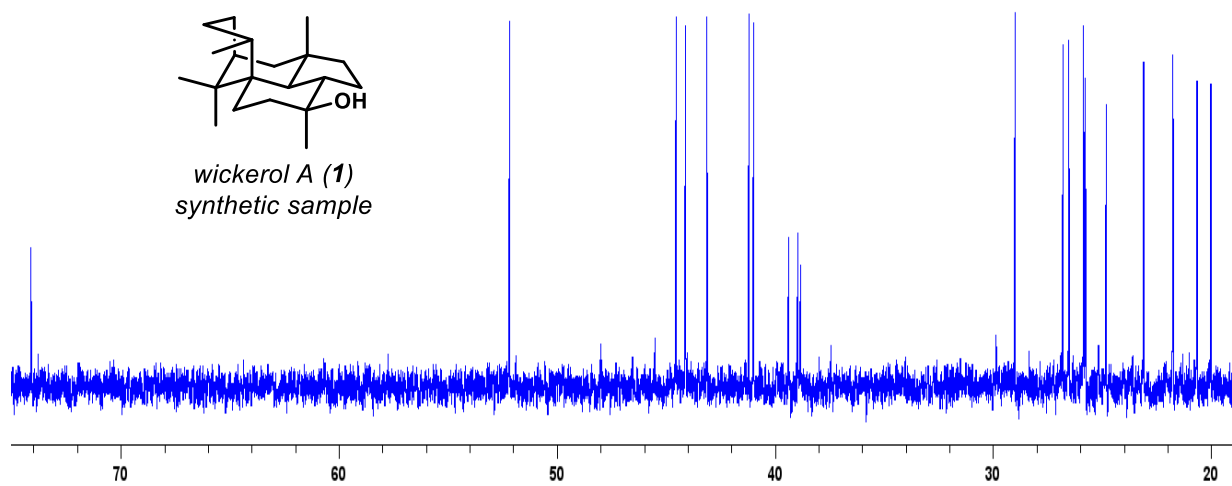

Comparison of Spectra Data – wickerol B (2)

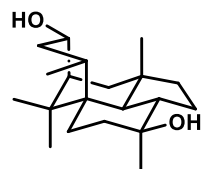

wickerol B (2)  
Ōmura's  
natural sample

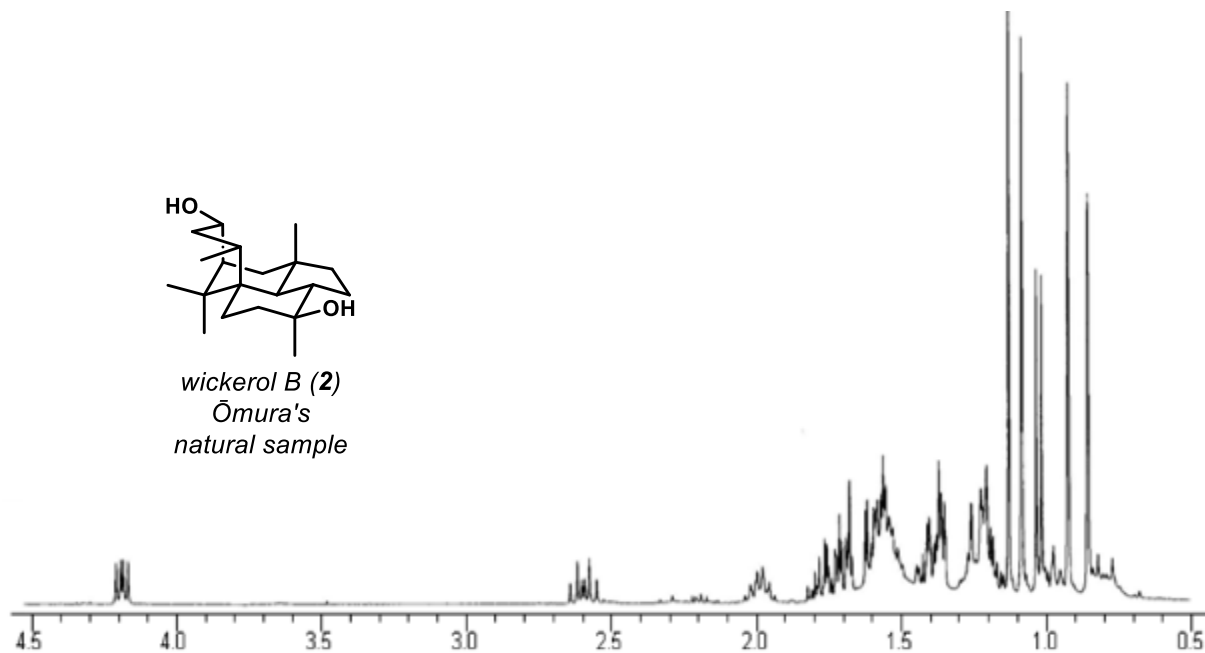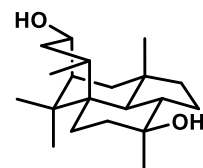

wickerol B (2)  
synthetic sample

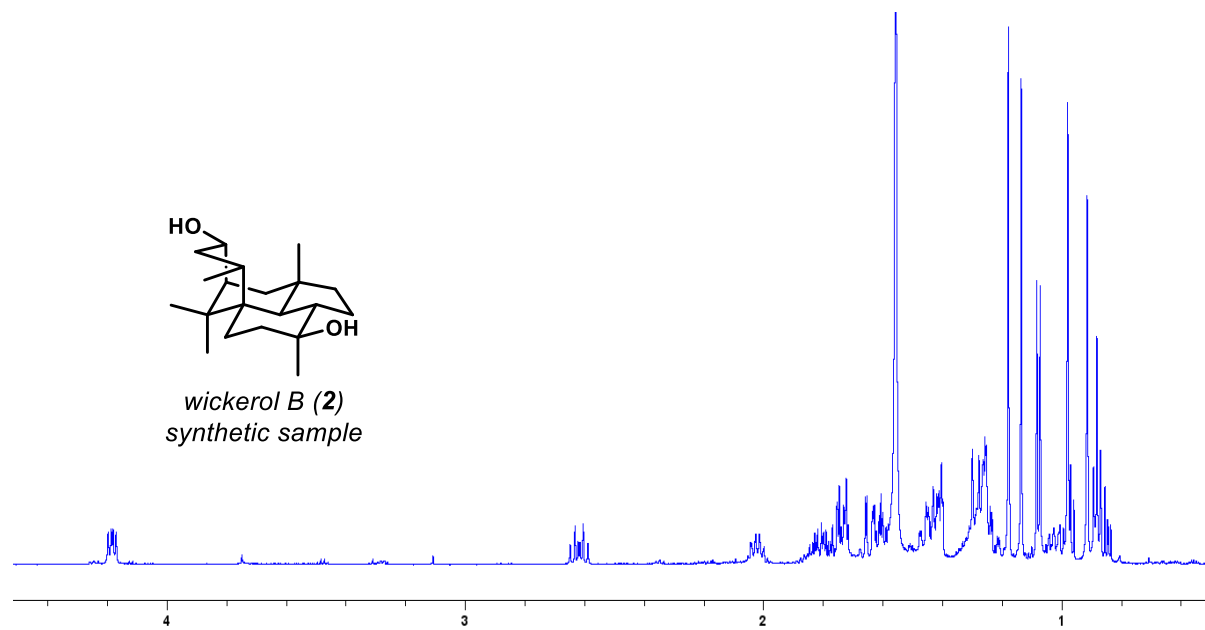

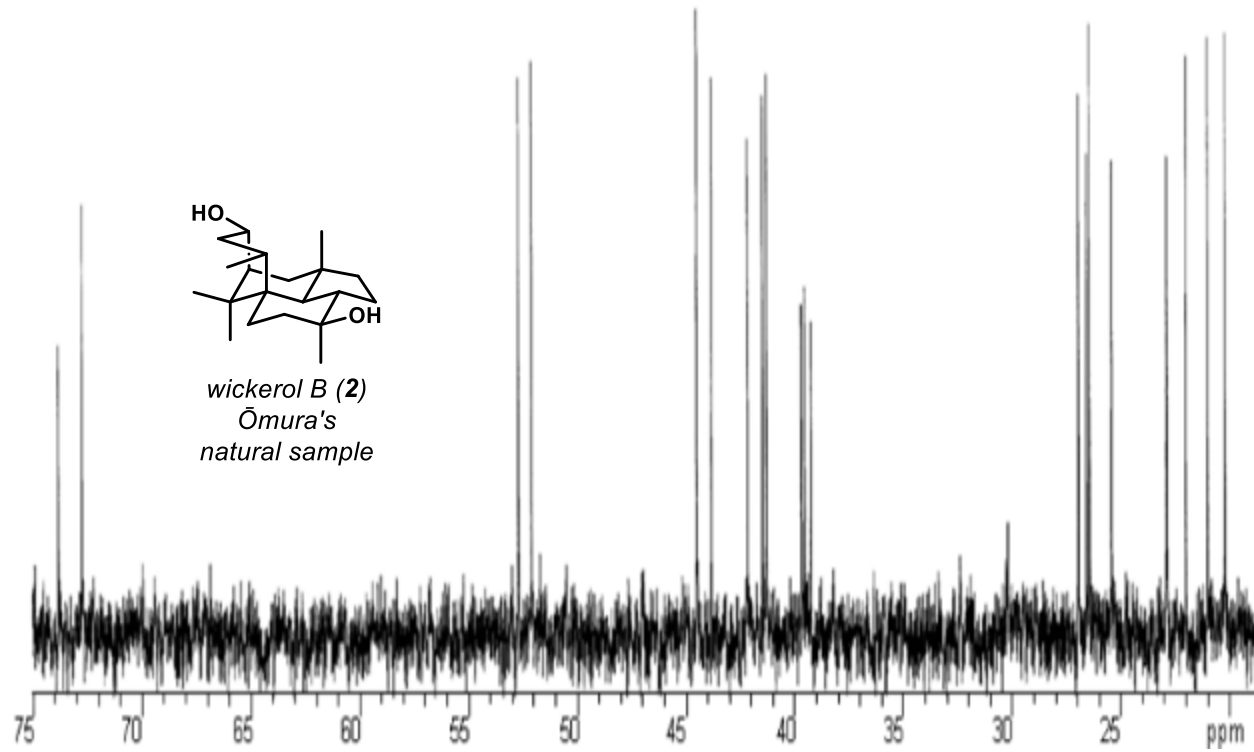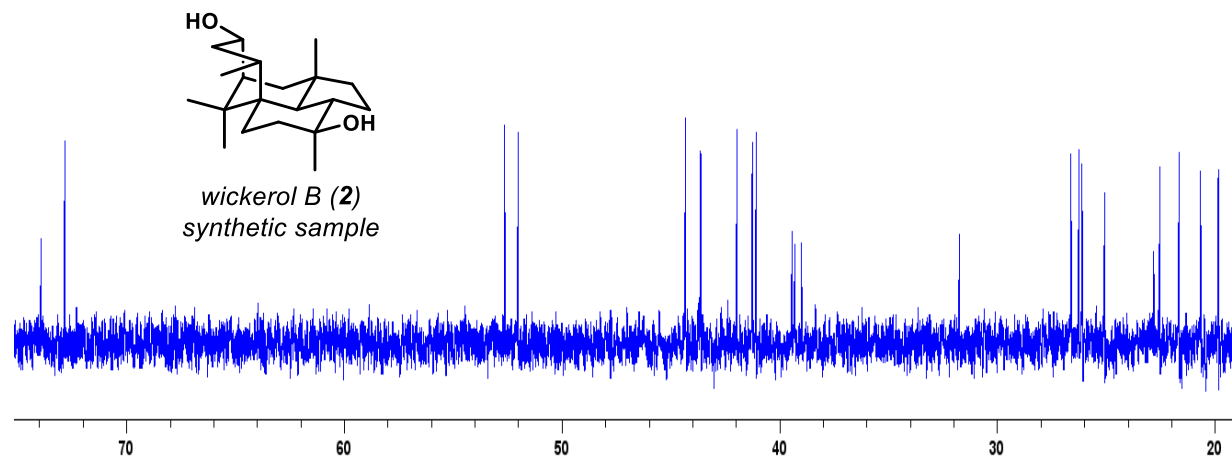

Comparison of Spectral Data – 8-O-acetyl wickerol B (85)

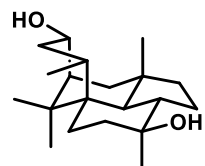

8-O-acetyl  
wickerol B (85)  
Ji's natural sample

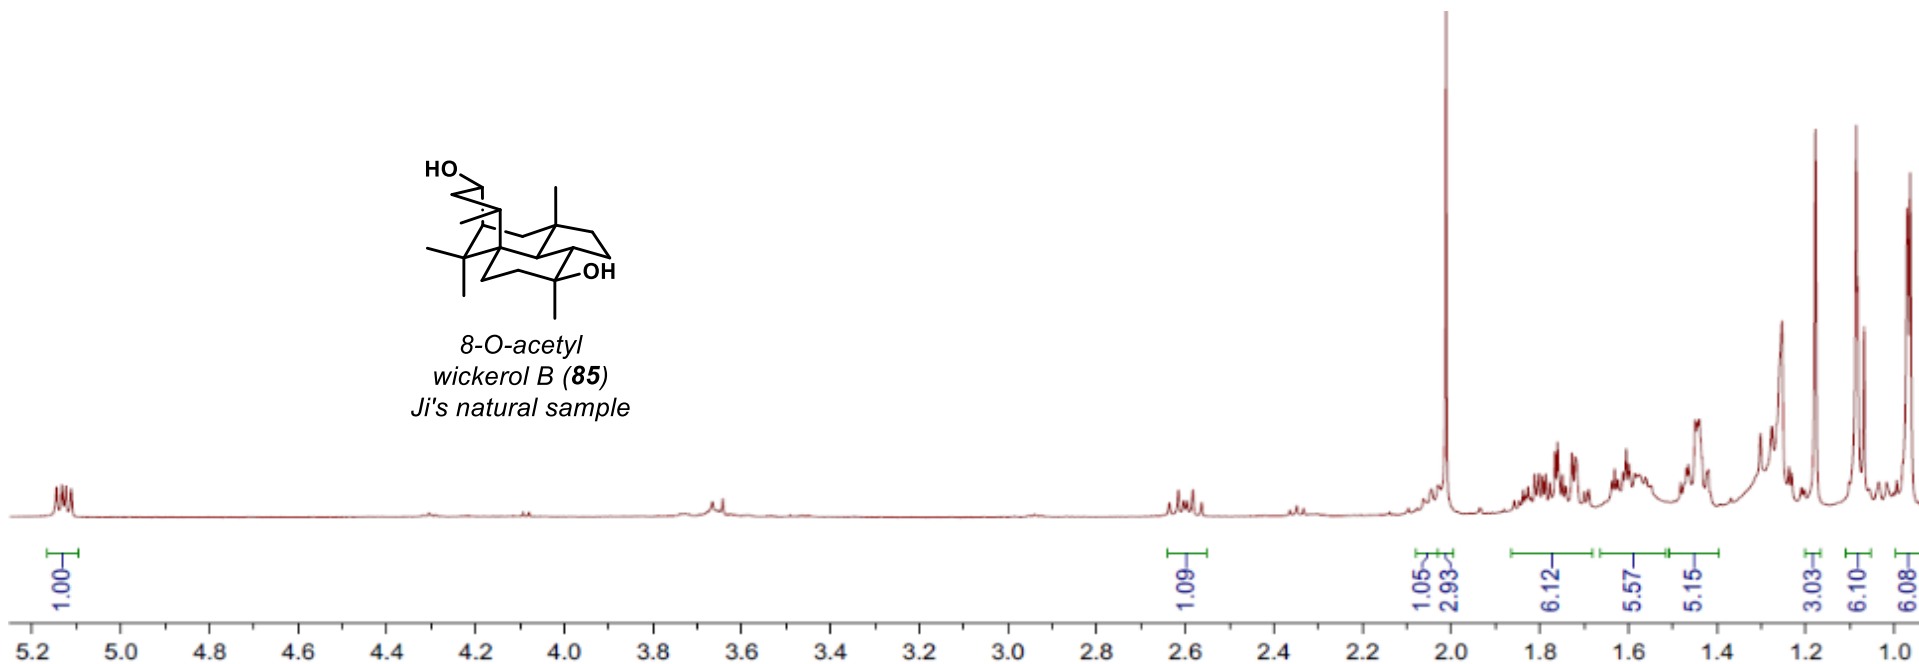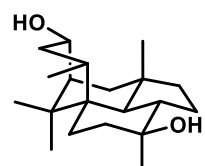

8-O-acetyl  
wickerol B (85)  
synthetic sample

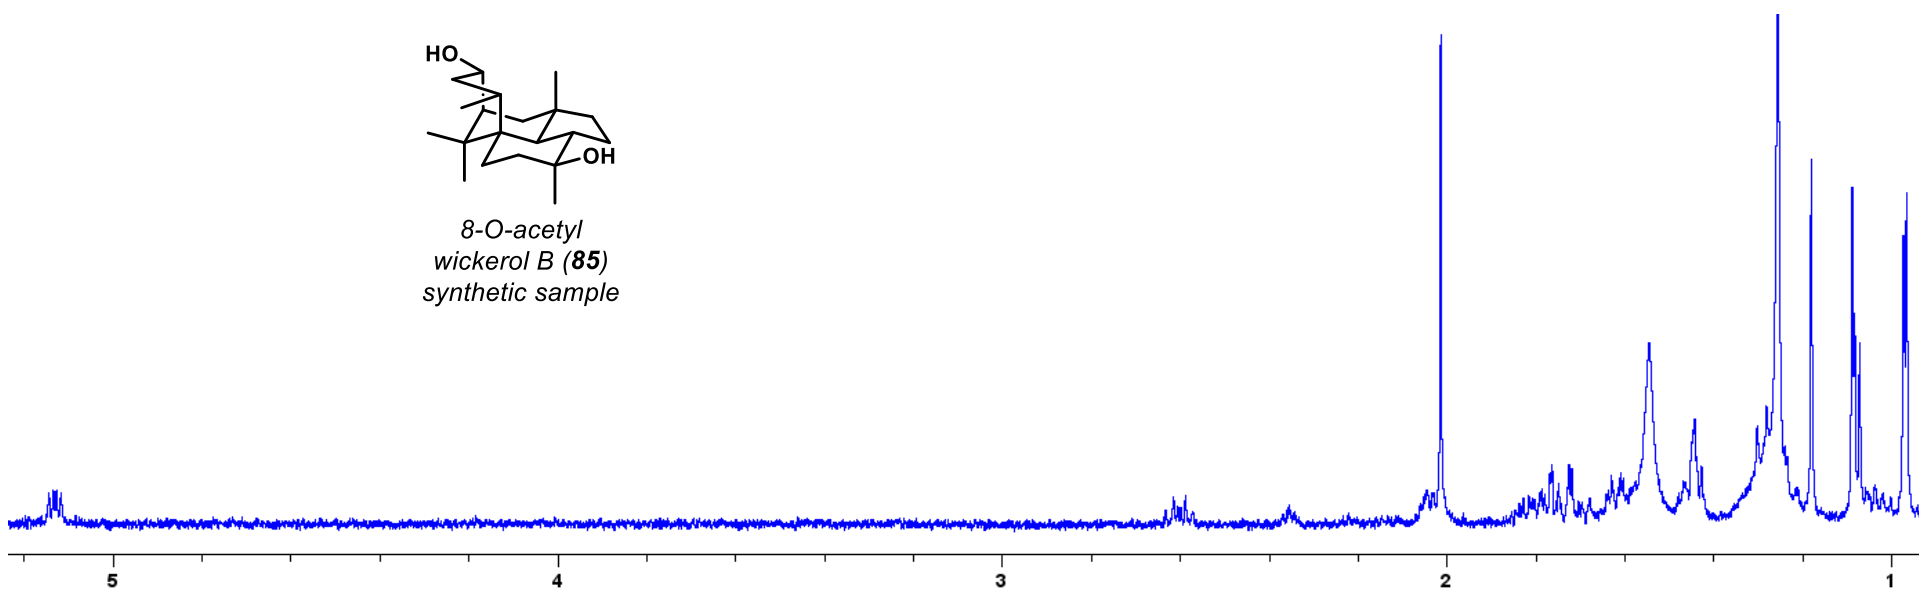



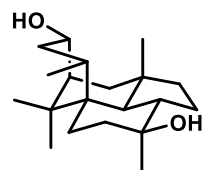

8-O-acetyl  
wickerol B (**85**)  
Ji's natural sample

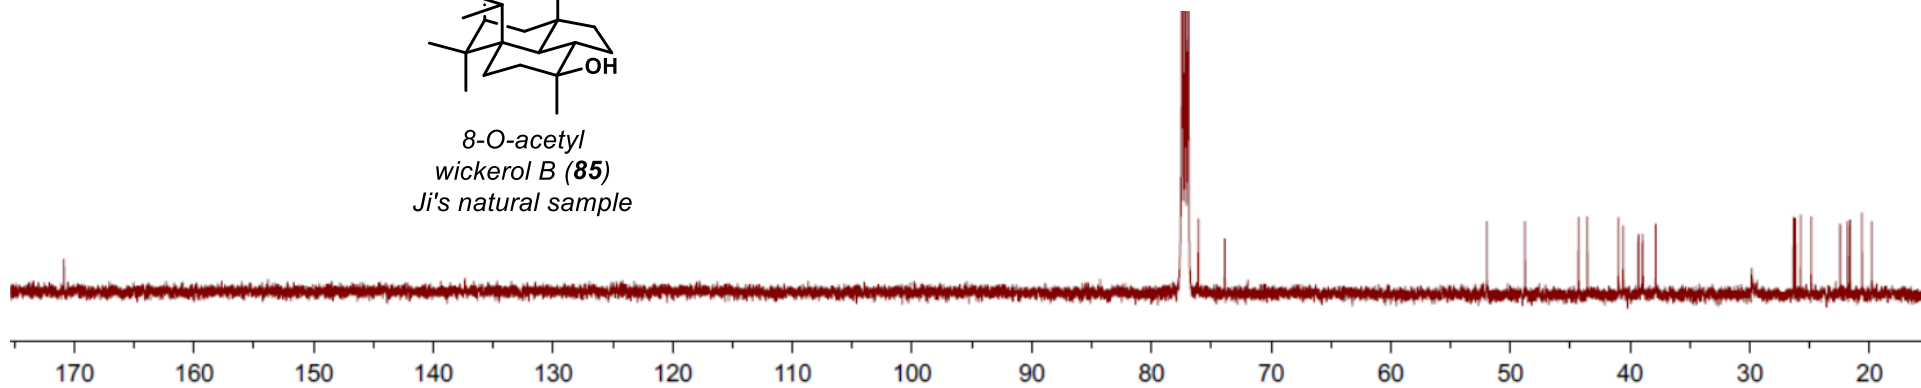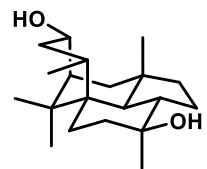

8-O-acetyl  
wickerol B (**85**)  
synthetic sample

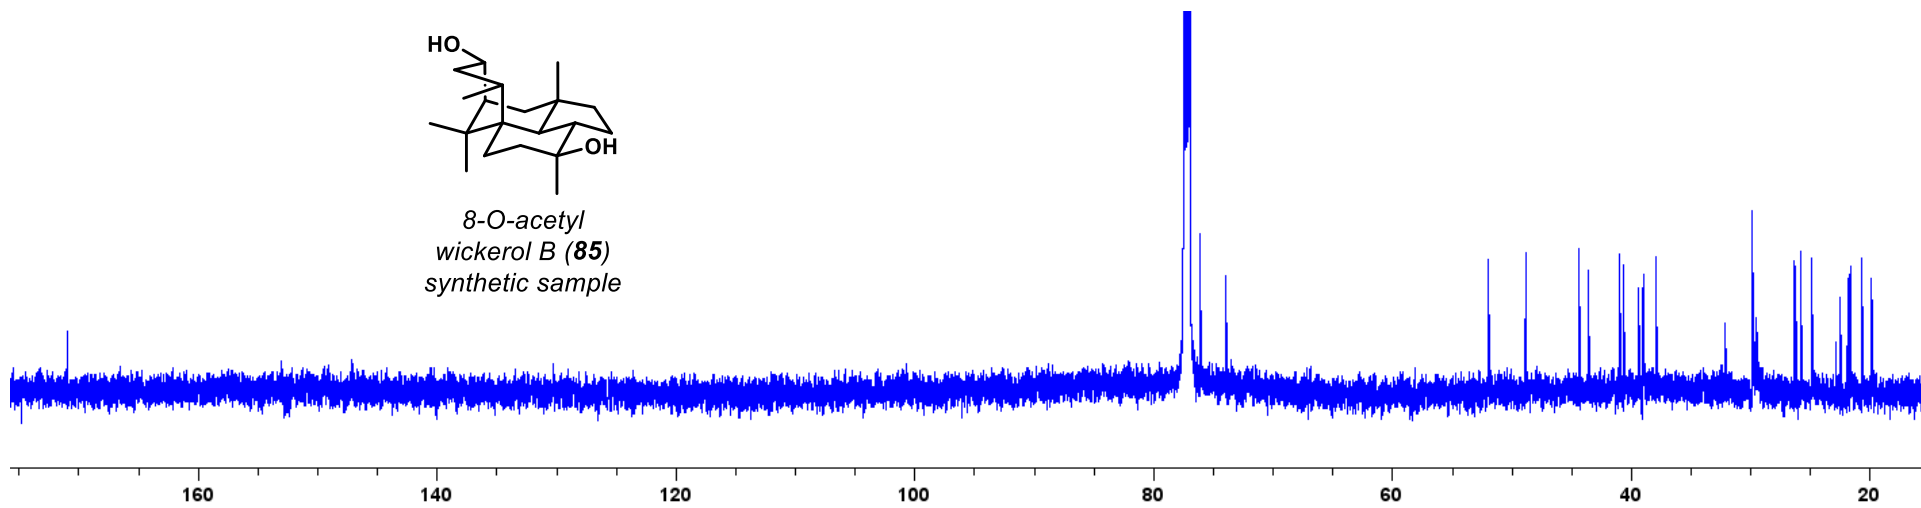

Supplement: ja3c00448_si_001.pdf [file ja3c00448_si_001.pdf]
